# Supplementary material for: Dissecting the DNA binding landscape and gene regulatory network of p63 and p53
Source: eLife journal article supplement (doi:10.7554/elife.63266), 2020-12-02
Supplement: supp [file elife_poa_e63266_Figure_5_figure_supplement_1.pdf › elife_poa_e63266_Figure_5_figure_supplement_1.pdf]

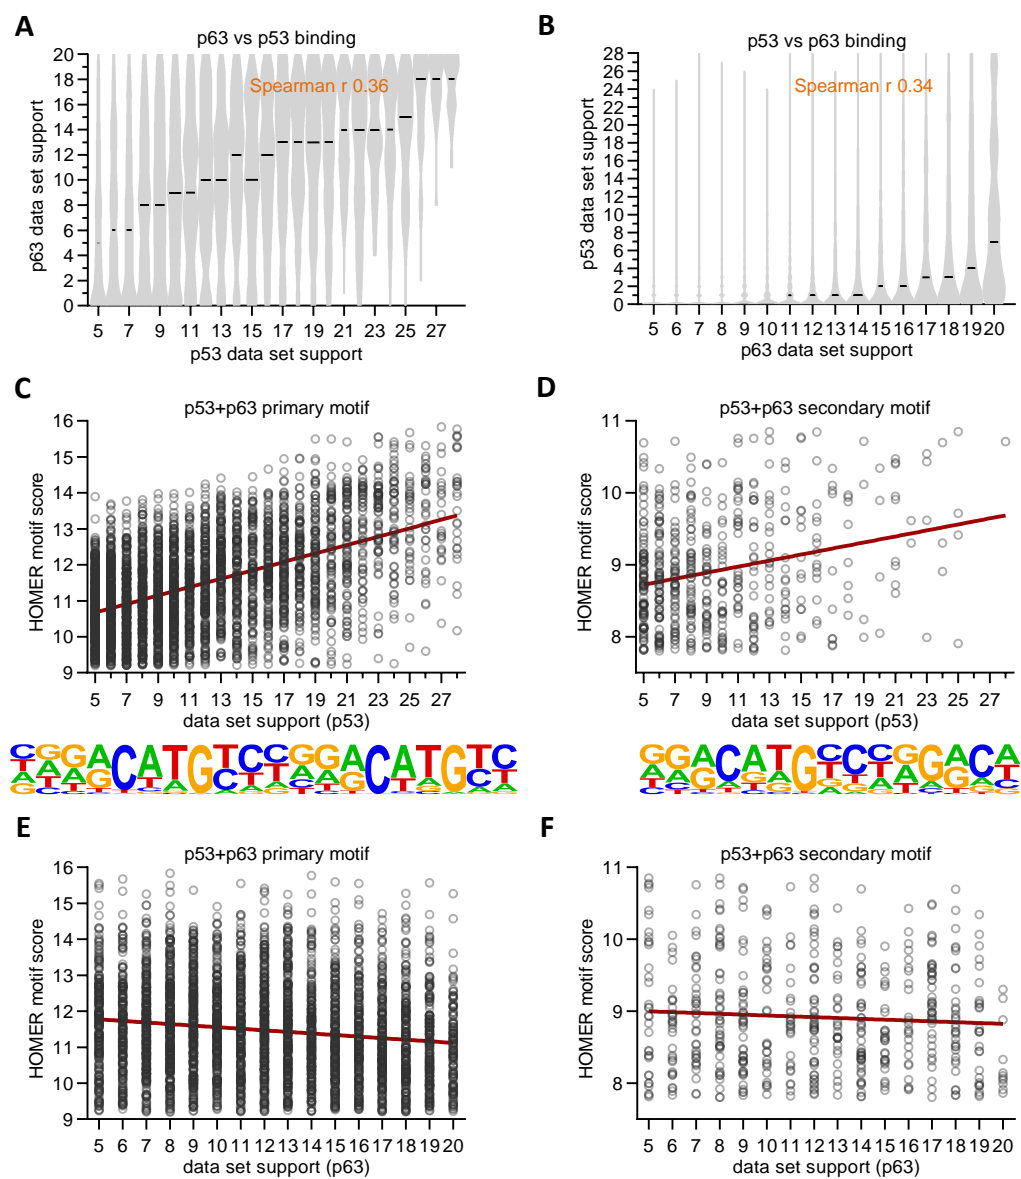

(A and B) Correlation between data set support for p53 and p63 binding. (C to F) Correlation between HOMER motif score for primary and secondary 'p53+p63' motifs and data set support for (C and D) p53 binding or (E and F) p63 binding
