# Supplementary material for: Dissecting the DNA binding landscape and gene regulatory network of p63 and p53
Source: eLife journal article supplement (doi:10.7554/elife.63266), 2020-12-02
Supplement: supp [file elife_poa_e63266_Figure_5_figure_supplement_2.pdf › elife_poa_e63266_Figure_5_figure_supplement_2.pdf]

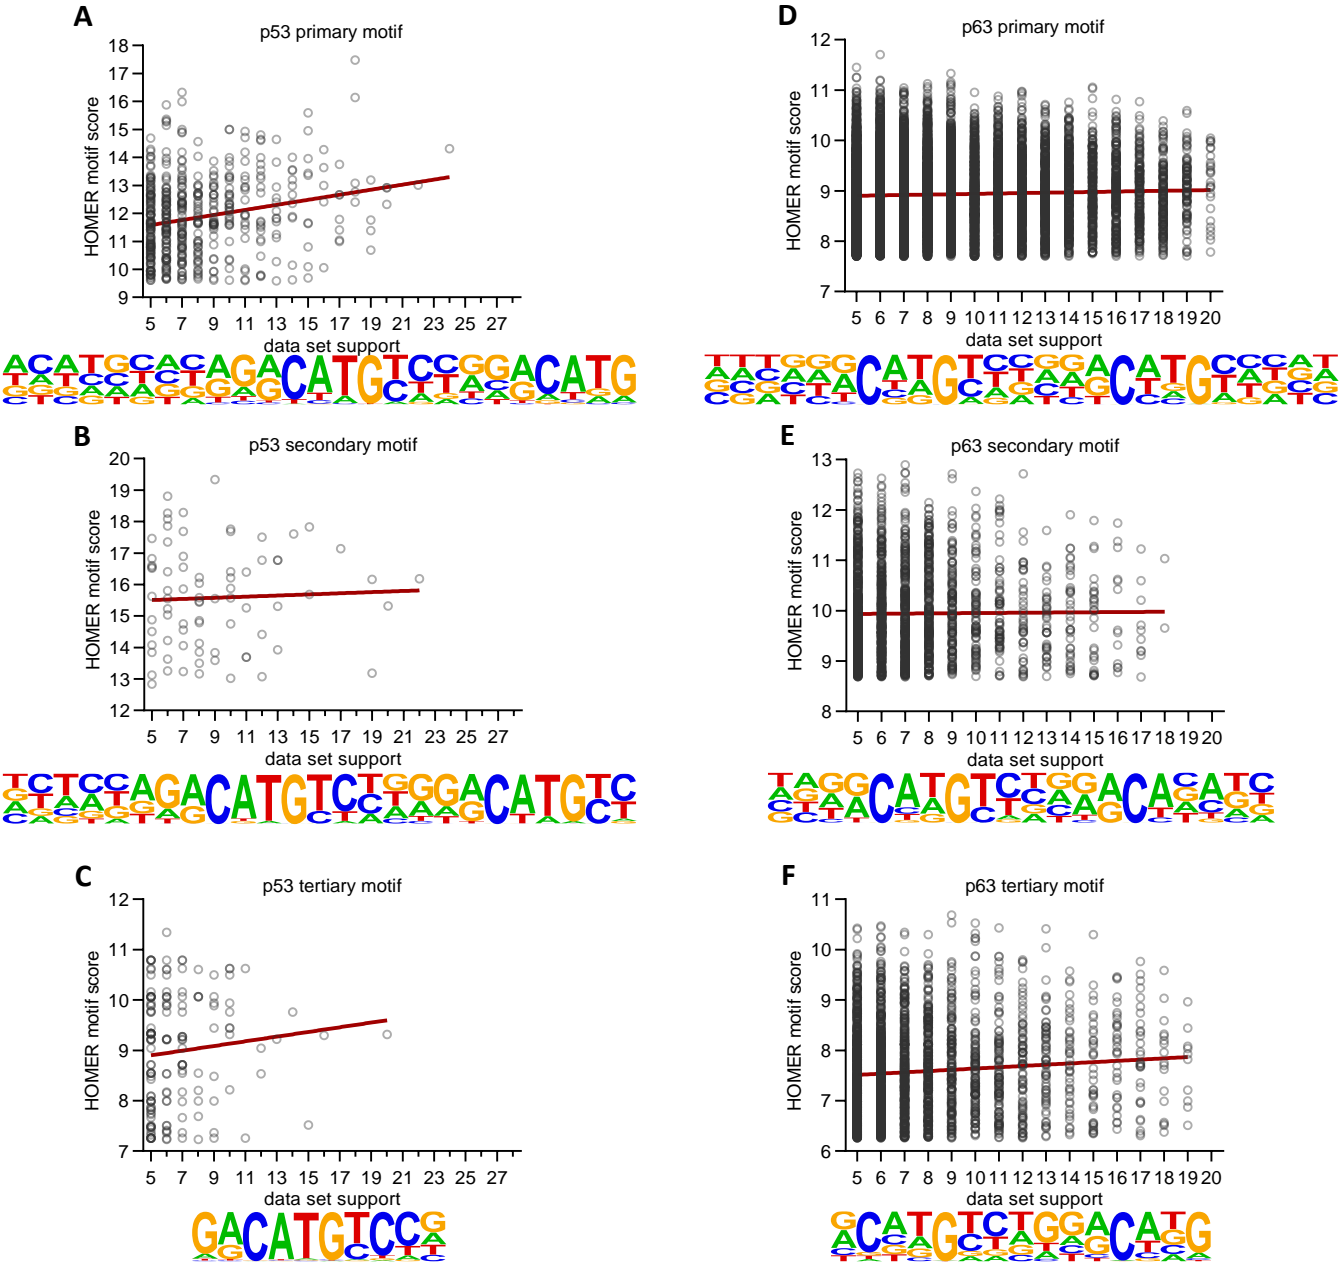

Correlation between HOMER motif score for primary, secondary and tertiary (A to C) ‘p53’ motifs or (D to F) ‘p63’ motifs and data set support for (A to C) p53 binding or (D to F) p63 binding.
