# Supplementary material for: Dissecting the DNA binding landscape and gene regulatory network of p63 and p53
Source: eLife journal article supplement (doi:10.7554/elife.63266), 2020-12-02
Supplement: supp [file elife_poa_e63266_Figure_5_figure_supplement_3.pdf › elife_poa_e63266_Figure_5_figure_supplement_3.pdf]

Top3 *de novo* motifs identified

p53+p63 common sites

| Motif                                                                            | p-value | % targets | % background | similarity |
|----------------------------------------------------------------------------------|---------|-----------|--------------|------------|
|  | 1E-6729 | 74.84%    | 0.90%        | p53        |
|  | 1E-382  | 3.04%     | 0.01%        | unknown    |
|  | 1E-256  | 1.95%     | 0.00%        | GATA       |

p53 unique sites

| Motif                                                                            | p-value | % targets | % background | similarity |
|----------------------------------------------------------------------------------|---------|-----------|--------------|------------|
|  | 1E-662  | 52.63%    | 1.38%        | p53        |
|  | 1E-163  | 6.08%     | 0.01%        | unknown    |
|  | 1E-131  | 5.56%     | 0.01%        | GATA       |

p63 unique sites

| Motif                                                                              | p-value  | % targets | % background | similarity  |
|------------------------------------------------------------------------------------|----------|-----------|--------------|-------------|
|  | 1E-11463 | 65.20%    | 4.46%        | p63         |
|  | 1E-761   | 23.99%    | 9.32%        | AP-1 (bZIP) |
|  | 1E-525   | 36.63%    | 21.03%       | bHLH        |

Top motifs co-enriched with primary ‘p53+p63’, ‘p53’, and ‘p63’ motifs at the respective DNA sites.
