# Supplementary material for: Dissecting the DNA binding landscape and gene regulatory network of p63 and p53
Source: eLife journal article supplement (doi:10.7554/elife.63266), 2020-12-02
Supplement: supp [file elife_poa_e63266_Figure_5_figure_supplement_4.pdf › elife_poa_e63266_Figure_5_figure_supplement_4.pdf]

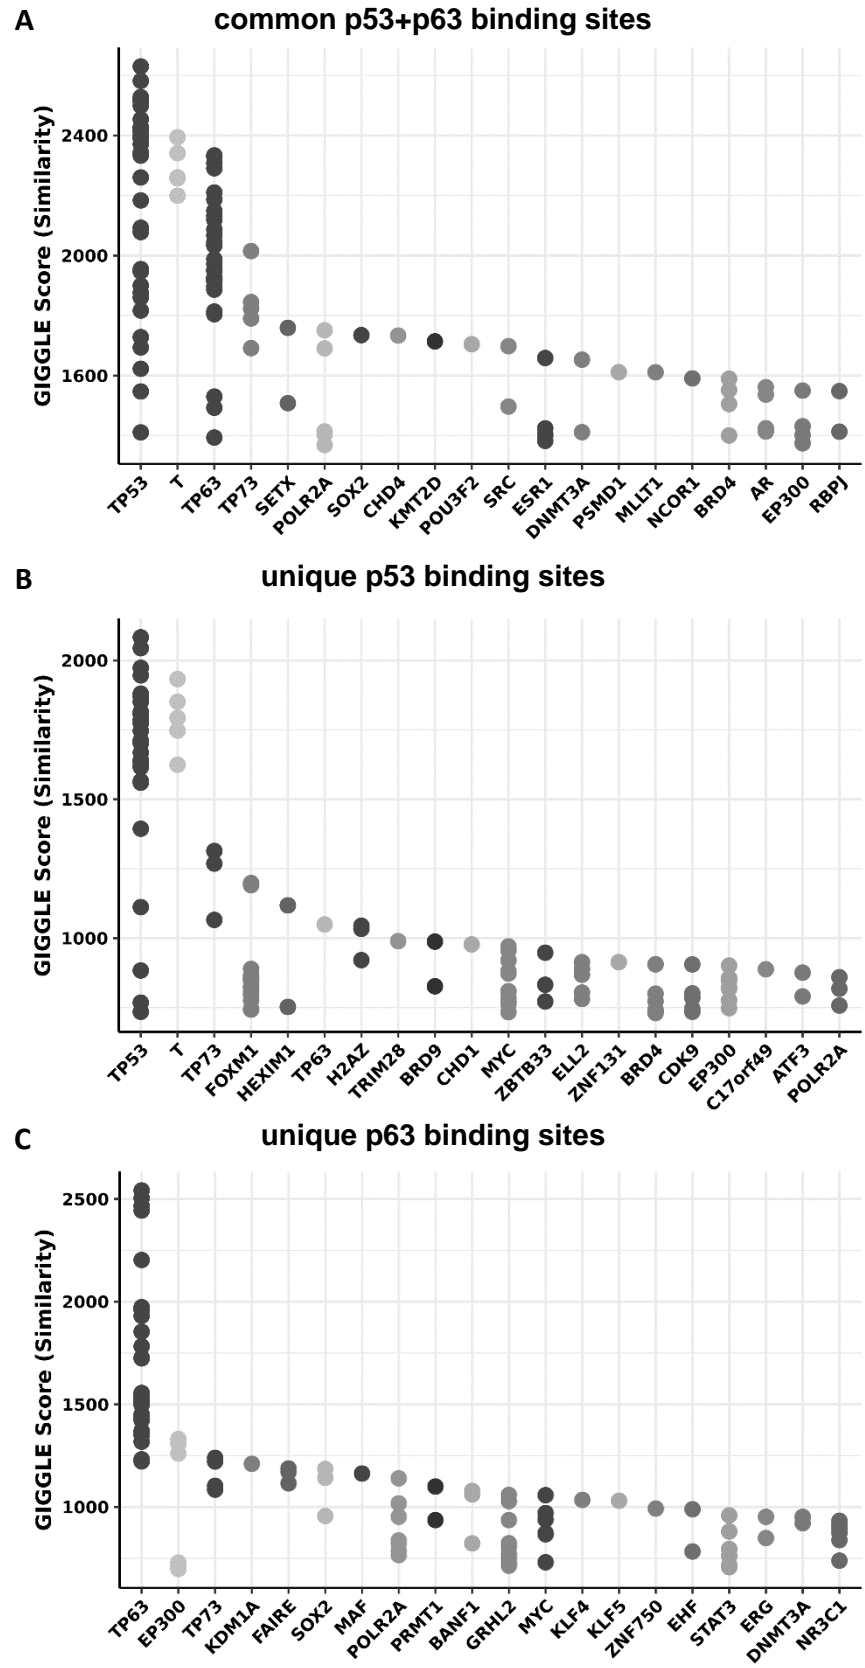

Top 20 TFs that possess ChIP-seq peaksets similar to **(A)** the common p53+p63 sites, **(B)** the unique p53 sites, and **(C)** the unique p63 sites (Figure 5E) as identified using CistromeDB toolkit. Of note, some TP53 ChIP-seq data sets are wrongly labeled “T” in the database.
