# Supplementary material for: Dissecting the DNA binding landscape and gene regulatory network of p63 and p53
Source: eLife journal article supplement (doi:10.7554/elife.63266), 2020-12-02
Supplement: supp [file elife_poa_e63266_Figure_7_figure_supplement_1.pdf › elife_poa_e63266_Figure_7_figure_supplement_1.pdf]

Riege et al., Figure 7 – figure supplement 1

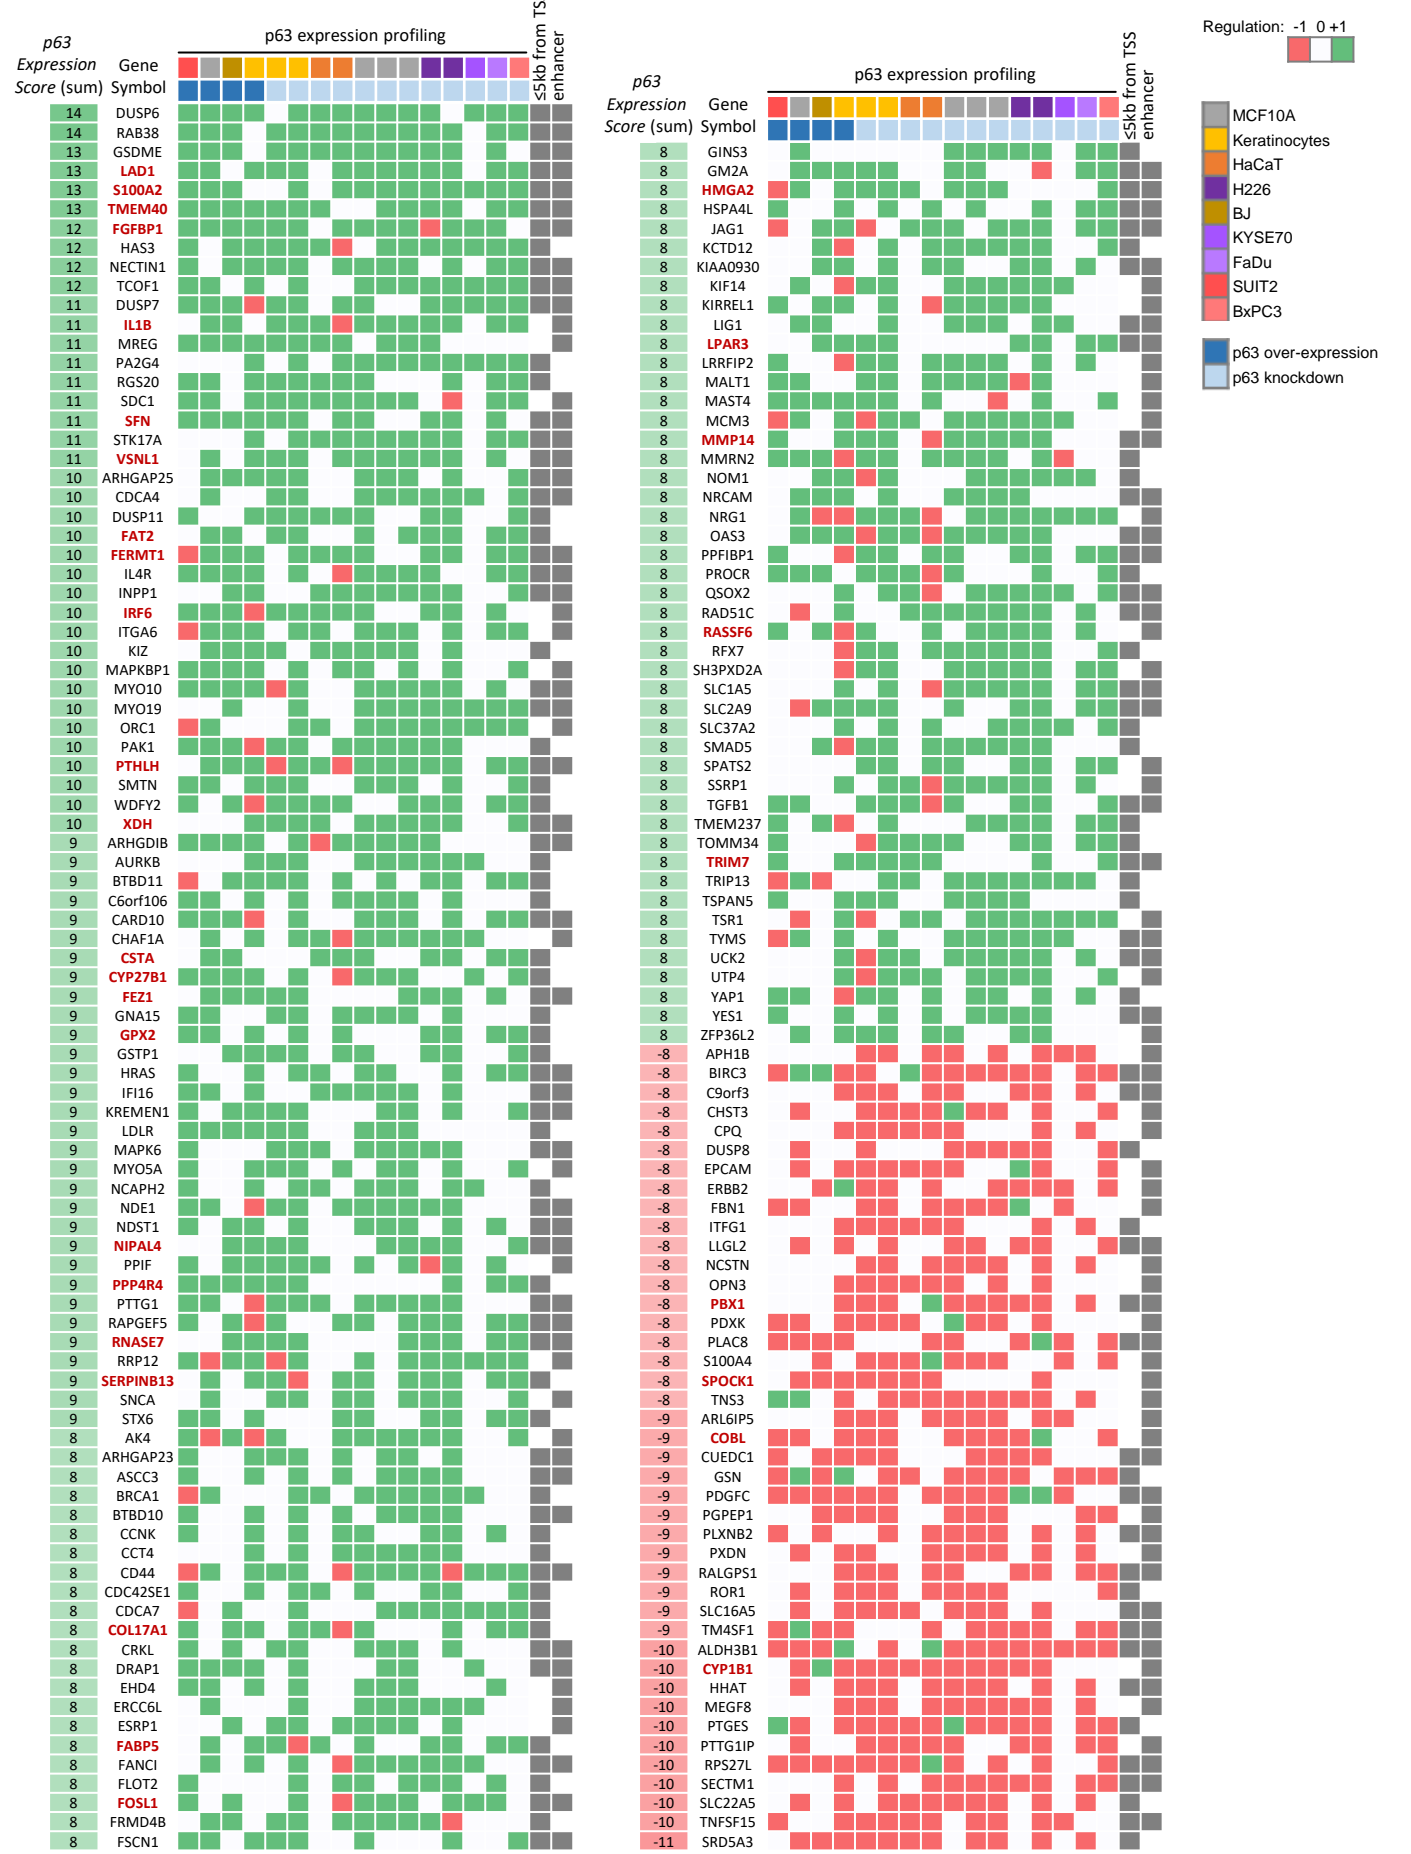

**Figure 7 – figure supplement 1**

Complement to Table 1. Genes identified as significantly up- or down-regulated in at least the half of all datasets ( $|p63 \text{ Expression Score}| \geq 8$ ) that are linked to p63 binding sites supported by at least half of all datasets ( $\geq 10$ ) through binding within 5 kb from their TSS or through double-elite enhancer:gene associations (Fishilevich et al., 2017). Using these thresholds we identified 138 and 42 high-probability candidates as directly up- and down-regulated by p63, respectively. Gene names marked in red are also up- or down-regulated across SCCs (Campbell et al., 2018).
