# Supplementary material for: Dissecting the DNA binding landscape and gene regulatory network of p63 and p53
Source: eLife journal article supplement (doi:10.7554/elife.63266), 2020-12-02
Supplement: supp [file elife_poa_e63266_Figure_8_figure_supplement_1.pdf › elife_poa_e63266_Figure_8_figure_supplement_1.pdf]

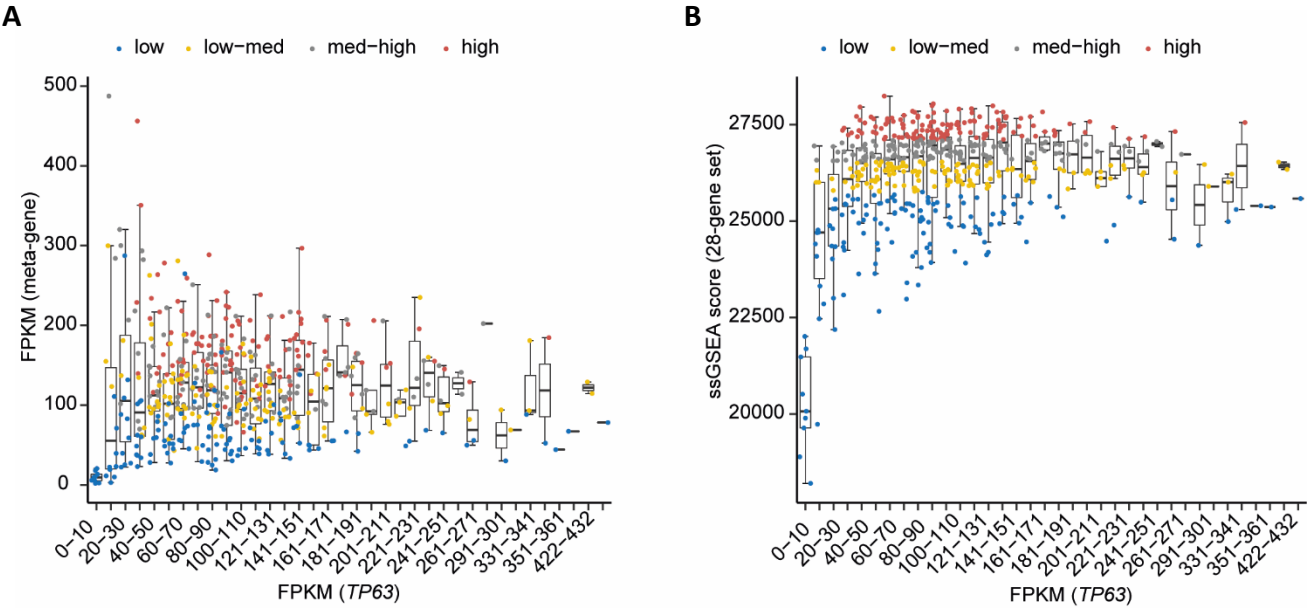

Boxplot in bins of 10 of *TP63* FPKM expression values in TCGA HNCSC patient sample data compared to **(A)** FPKM values of a meta-gene comprising the 28-gene set and **(B)** ssGSEA scores of the 28-gene set. Complementary to Figure 8C and D.
