# Supplementary material for: Dissecting the DNA binding landscape and gene regulatory network of p63 and p53
Source: eLife. 2020 Dec 2;9:e63266. doi: 10.7554/eLife.63266 (PMC7735755; doi:10.7554/eLife.63266)
Supplement: Supplementary file 1. [file elife-63266-supp1.xlsx]

## Sheet: Tabelle1
p63-dependent gene expression profiling data sets obtained from GEO
	Data set	Platform	GEO ID	Treatment samples	Control samples
	Carroll 2006 shp63 MCF10A	microarray	GSE20286	GSM508614	GSM508612
				GSM508615	GSM508613
	Carroll 2006 ΔNp63 MCF10A	microarray	GSE20286	GSM508621	GSM508618
				GSM508622	GSM508619
				GSM508623	GSM508620
	Zarnegar 2012 sip63 KC	microarray	GSE33572	GSM828658	GSM828656
				GSM828659	GSM828657
	Zarnegar 2012 ΔNp63 KC	microarray	GSE33572	GSM828664	GSM828656
				GSM828665	GSM828657
	Gallant-Behm 2012 shp63 H226	microarray	GSE40462	GSM994506	GSM994502
				GSM994507	GSM994503
	Wu 2012 sip53 HaCaT	microarray	GSE17394	GSM434573	GSM434561
				GSM434575	GSM434563
				GSM434577	GSM434565
				GSM434579	GSM434567
				GSM434581	GSM434569
				GSM434583	GSM434571
	Saladi 2017 shp63 HaCaT	microarray	GSE88832	GSM2349896	GSM2349893
				GSM2349897	GSM2349894
				GSM2349898	GSM2349895
	Saladi 2017 shp63 FaDU	microarray	GSE88833	GSM2349908	GSM2349902
				GSM2349909	GSM2349903
				GSM2349910	GSM2349904
	Saladi 2017 shp63 JHU029	microarray	GSE88833	GSM2349905	GSM2349899
				GSM2349906	GSM2349900
				GSM2349907	GSM2349901
	Bao 2015 sip63 KC	RNA-seq	GSE67382	GSM1921008	GSM1921004
				GSM1921009	GSM1921005
	Uzunbas 2019 shp63 MCF10A	RNA-seq	GSE111009	GSM3020089	GSM3020093
				GSM3020090	GSM3020094
	Uzunbas 2019 shp63 MCF10A Nutlin	RNA-seq	GSE111009	GSM3020091	GSM3020095
				GSM3020092	GSM3020096
	Abraham 2018 shp63 H226	RNA-seq	GSE111619	GSM3035187	GSM3035185
				GSM3035188	GSM3035186
	Watanabe 2014 shp63 KYSE70	RNA-seq	GSE47058	GSM1143927	GSM1143923
				GSM1143928	GSM1143926
	Somerville 2018 shsgp63 BxPC3	RNA-seq	GSE115462	GSM3178703	GSM3178701
				GSM3178704	GSM3178702
				GSM3377437	GSM3377436
				GSM3377438
	Somerville 2018 ΔNp63 PATU8988S	RNA-seq	GSE115462	GSM3178710	GSM3178708
				GSM3178711	GSM3178709
	Somerville 2018 ΔNp63 SUIT2	RNA-seq	GSE115462	GSM3377416	GSM3377415
				GSM3377418	GSM3377417
	Lin-Shiao 2019 ΔNp63 BJ	RNA-seq	GSE126397	GSM3597757	GSM3597749
				GSM3597758	GSM3597750
p63 DNA binding data sets obtained from CistromeDB
Data set #	Study	GEO ID	CistromeDB ID	Number of peaks	p63 antibody	Cells
1	Bao 2015	GSM1645715	58190	27091	H137 (Santa Cruz)	KC
2	Kouwenhoven 2010	GSM439776	4718	64262	4A4 (Abcam)	KC
		GSM439777	4719		4A4 (Abcam)
		GSM538930	5206		H129 (Santa Cruz)
3	Kouwenhoven 2015 (differentiation day0)	GSM1446927	52299	51518	H129 (Santa Cruz)	KC
4	Kouwenhoven 2015 (differentiation day2)	GSM1446928	52300	50890
5	Kouwenhoven 2015 (differentiation day4)	GSM1446929	52301	43842
6	Kouwenhoven 2015 (differentiation day7)	GSM1446930	52302	42810
7	McDade 2012	GSM794864	34559	2772	4A4 (Santa Cruz)	KC
8	McDade 2014	GSM1366686	44759	18052	4A4 (Santa Cruz)	KC
		GSM1366692	44765
9	McDade 2014 (cisplatin)	GSM1366688	44761	17616
		GSM1366694	44767
10	McDade 2014 (doxorubicin)	GSM1366687	44760	1882
		GSM1366693	44766
11	Olsen 2013	GSM1056847	41284	7980	4A4 (Abcam)	EP156T
12	Saladi 2017	GSM2350362	72220	15036	H129 (Santa Cruz)	JHU-029
13	Vasilaki 2016	GSM1489260	71029	12620	H129 (Santa Cruz)	HaCaT
14	Vasilaki 2016 (RAS)	GSM1489262	71027	12562
15	Vasilaki 2016 (RAS+TGFB)	GSM1489263	71026	5342
16	Vasilaki 2016 (TGFB)	GSM1489261	71028	12366
17	Watanabe 2014	GSM1139039	44231	6375	4A4 (Santa Cruz)	HCC95
18	Watanabe 2014	GSM1139036	44228	6854		TT
19	Zarnegar 2012 (differentiated)	GSM830122	36141	23378	4A4 (Santa Cruz)	KC
20	Zarnegar 2012 (progenitor)	GSM830121	36140	16495
	KC = keratinocytes
