# Supplementary material for: Dissecting the DNA binding landscape and gene regulatory network of p63 and p53
Source: eLife. 2020 Dec 2;9:e63266. doi: 10.7554/eLife.63266 (PMC7735755; doi:10.7554/eLife.63266)
Supplement: Supplementary file 2. [file elife-63266-supp2.xlsx]

## Sheet: p63 GRN
Chromosome	Transcript type	Ensembl ID	Gene Symbol	p63 Expression Score (-16..0..16)	p63 binding (≥10 data sets) within 5kb from TSS	p63 binding (≥10 data sets) linked through double-elite enhancer association	p53 Expression Score (-20..0..20)	covered by #data sets	covered by #RNA-seq	Carroll 2006 Np63 MCF10A (log2FC)	Carroll 2006 Np63 MCF10A (adj.p-value)	Carroll 2006 Np63 MCF10A (0,1)	Carroll 2006 Np63 MCF10A (-1,0,1)	Zarnegar 2012 Np63 KC (log2FC)	Zarnegar 2012 Np63 KC (adj.p-value)	Zarnegar 2012 Np63 KC (0,1)	Zarnegar 2012 Np63 KC (-1,0,1)	Zarnegar 2012 sip63 KC (log2FC)	Zarnegar 2012 sip63 KC (adj.p-value)	Zarnegar 2012 sip63 KC (0,1)	Zarnegar 2012 sip63 KC (-1,0,1)	Bao 2015 shp63 KC (log2FC)	Bao 2015 shp63 KC (adj.p-value)	Bao 2015 shp63 KC (0,1)	Bao 2015 shp63 KC (-1,0,1)	Wu 2012 sip63 HaCaT (log2FC)	Wu 2012 sip63 HaCaT (adj.p-value)	Wu 2012 sip63 HaCaT (0,1)	Wu 2012 sip63 HaCaT (-1,0,1)	Saladi 2017 shp63 HaCaT (log2FC)	Saladi 2017 shp63 HaCaT (adj.p-value)	Saladi 2017 shp63 HaCaT (0,1)	Saladi 2017 shp63 HaCaT (-1,0,1)	Lin-Shiao 2019 DNp63 BJ (log2FC)	Lin-Shiao 2019 DNp63 BJ (adj.p-value)	Lin-Shiao 2019 DNp63 BJ (0,1)	Lin-Shiao 2019 DNp63 BJ (-1,0,1)	Carroll 2006 shp63 MCF10A (log2FC)	Carroll 2006 shp63 MCF10A (adj.p-value)	Carroll 2006 shp63 MCF10A (0,1)	Carroll 2006 shp63 MCF10A (-1,0,1)	Uzunbas 2019 shp63 MCF10A (log2FC)	Uzunbas 2019 shp63 MCF10A (adj.p-value)	Uzunbas 2019 shp63 MCF10A (0,1)	Uzunbas 2019 shp63 MCF10A (-1,0,1)	Uzunbas 2019 shp63 MCF10A Nutlin (log2FC)	Uzunbas 2019 shp63 MCF10A Nutlin (adj.p-value)	Uzunbas 2019 shp63 MCF10A Nutlin (0,1)	Uzunbas 2019 shp63 MCF10A Nutlin (-1,0,1)
12	protein_coding	ENSG00000139318	DUSP6	14	1	1	3	16	8	1.16	4.89e-05	1	1	2.13391	0.00218	1	1	-1.14	0.065031	1	0	-2.89696	4.94256e-101	1	1	-0.546	4.89e-05	1	1	-0.181135	0.013688	1	1	0.805961	0.00176801	1	1	-1.06	5.74e-05	1	1	-0.440514	0.00560653	1	1	-0.347973	9.59259e-05	1	1
11	protein_coding	ENSG00000123892	RAB38	14	1	1	0	16	8	0.575	0.00686	1	1	0.244028	0.300512	1	0	-1.11	0.009457	1	1	-0.408829	0.000490072	1	1	-0.165	0.00386	1	1	-0.677094	0.00026002	1	1	2.1637	2.17277e-11	1	1	-1.31	1.71e-05	1	1	-0.815277	2.14867e-06	1	1	-0.748194	2.495e-10	1	1
7	protein_coding	ENSG00000105928	GSDME	13	1	1	9	16	8	0.469	0.00181	1	1	-0.0695312	0.710426	1	0	-1.21	0.010129	1	1	-2.93801	1.53888e-101	1	1	-0.263	0.00341	1	1	-0.196023	0.0315901	1	1	1.16106	1.23322e-07	1	1	-0.776	0.000297	1	1	-0.864778	1.57783e-09	1	1	-0.510188	1.16851e-08	1	1
1	protein_coding	ENSG00000159166	LAD1	13	1	1	-1	14	6	0.495	0.00962	1	1	3.15888	0.0003467	1	1	-1.07	0.031714	1	1	-0.355564	0.000466492	1	1	-0.112	0.215	1	0	-0.461747	0.00088254	1	1	---	---	0	0	-1.7	5.46e-06	1	1	-0.319105	0.0153569	1	1	-0.349275	5.59237e-06	1	1
14	protein_coding	ENSG00000198805	PNP	13	0	0	0	16	8	0.5	0.0426	1	1	1.31741	0.0094677	1	1	0.0724	0.906505	1	0	-1.30257	1.77614e-40	1	1	-0.0182	0.863	1	0	-0.190244	0.0218549	1	1	1.30011	1.68497e-08	1	1	-0.512	0.00174	1	1	-0.311555	0.0433929	1	1	-0.33299	8.39962e-05	1	1
1	protein_coding	ENSG00000196754	S100A2	13	1	1	8	16	8	0.436	0.0026	1	1	-0.00668754	0.975001	1	0	-0.576	0.074162	1	0	-4.23417	0	1	1	-0.316	0.114	1	0	-0.298805	0.0248473	1	1	5.74062	1.26255e-156	1	1	-0.658	0.000461	1	1	-0.758331	5.48177e-10	1	1	-0.281719	0.0443046	1	1
3	protein_coding	ENSG00000088726	TMEM40	13	1	1	12	16	8	0.874	0.000321	1	1	1.19681	0.0011741	1	1	-1.1	0.004781	1	1	-2.61424	8.80671e-194	1	1	-0.385	0.00428	1	1	0.0254538	0.759947	1	0	2.56174	2.56394e-06	1	1	-0.229	0.193	1	0	-1.48169	1.25197e-06	1	1	-0.859438	1.6802e-06	1	1
3	protein_coding	ENSG00000073282	TP63	13	0	0	-3	16	8	3.08	0.000138	1	1	-1.11741	0.0013046	1	-1	-1.25	0.006322	1	1	-1.81464	8.35224e-56	1	1	-0.203	0.00965	1	1	-0.44183	0.00045098	1	1	12.7801	2.40389e-10	1	1	-2.17	8.85e-06	1	1	-0.607244	3.70516e-05	1	1	-0.120647	0.258857	1	0
4	protein_coding	ENSG00000137440	FGFBP1	12	1	1	-1	16	8	3.19	1.16e-06	1	1	0.928212	0.0028228	1	1	-0.915	0.008607	1	1	-1.60853	1.96693e-39	1	1	0.514	0.0668	1	0	-0.270323	0.0070942	1	1	6.9955	9.14857e-05	1	1	-1.2	8.94e-05	1	1	-1.66518	1.43885e-43	1	1	-1.21178	6.85335e-77	1	1
16	protein_coding	ENSG00000103044	HAS3	12	1	0	6	14	8	---	---	0	0	1.64323	0.0101412	1	1	-1.37	0.045116	1	1	-3.74221	2.91215e-76	1	1	-0.31	0.000402	1	1	0.325044	0.0213139	1	-1	1.57692	5.3241e-05	1	1	---	---	0	0	-2.0919	9.50625e-07	1	1	-1.44344	1.6053e-09	1	1
11	protein_coding	ENSG00000110400	NECTIN1	12	1	1	6	16	8	0.173	0.102	1	0	0.622629	0.0142181	1	1	-1.21	0.004081	1	1	-0.709251	8.52922e-15	1	1	0.125	0.564	1	0	-0.364061	0.0013513	1	1	1.5981	5.33444e-09	1	1	-1.06	4.18e-05	1	1	-0.666126	8.42866e-07	1	1	-0.662704	2.27341e-26	1	1
5	protein_coding	ENSG00000070814	TCOF1	12	1	1	-11	16	8	0.377	0.0205	1	1	0.576645	0.0358671	1	1	0.472	0.118512	1	0	-1.24386	1.08778e-28	1	1	0.00133	0.988	1	0	0.0725724	0.244296	1	0	0.383946	0.205224	1	0	-1.4	1.46e-05	1	1	-0.884732	1.22365e-13	1	1	-1.18909	4.67668e-64	1	1
16	protein_coding	ENSG00000166451	CENPN	11	0	0	-15	16	8	0.28	0.0272	1	1	0.432397	0.0388689	1	1	-0.698	0.017052	1	1	-1.15704	7.747e-09	1	1	-0.0435	0.591	1	0	-0.188905	0.0165813	1	1	-0.266208	0.582032	1	0	-0.949	7.78e-05	1	1	-1.37063	5.57094e-13	1	1	-1.65156	1.27999e-32	1	1
3	protein_coding	ENSG00000164086	DUSP7	11	1	1	0	15	8	0.545	0.00175	1	1	-0.53693	0.0245378	1	-1	-1.43	0.002788	1	1	-1.89143	6.55495e-81	1	1	---	---	0	0	-0.379895	0.00085718	1	1	0.755333	0.00824813	1	1	-1.62	1.02e-05	1	1	-0.272075	0.0765038	1	0	-0.131209	0.145308	1	0
X	protein_coding	ENSG00000090776	EFNB1	11	0	0	13	16	8	0.383	0.226	1	0	0.722337	0.0096003	1	1	-0.513	0.045873	1	1	-1.56639	1.28089e-54	1	1	0.0449	0.755	1	0	0.0578394	0.388036	1	0	2.40308	4.99119e-16	1	1	-0.831	0.000245	1	1	-0.328155	0.0627761	1	0	-0.41382	2.04424e-05	1	1
2	protein_coding	ENSG00000125538	IL1B	11	0	1	6	15	7	1.74	3.36e-05	1	1	-0.21465	0.234538	1	0	-4.26	0.001386	1	1	-6.0981	3.62971e-76	1	1	-0.543	0.00779	1	1	0.568972	0.00049262	1	-1	4.84113	7.77125e-31	1	1	-0.732	0.000367	1	1	-1.43893	1.03377e-14	1	1	-1.78538	1.01135e-72	1	1
2	protein_coding	ENSG00000118242	MREG	11	0	1	3	16	8	1.1	0.00475	1	1	1.16902	0.0011011	1	1	-1.42	0.002817	1	1	-0.357297	0.0343624	1	1	-0.423	0.000223	1	1	-0.230077	0.0377988	1	1	1.91986	7.42918e-12	1	1	0.00863	0.958	1	0	-0.76702	0.0106451	1	1	-0.518344	0.00746581	1	1
12	protein_coding	ENSG00000170515	PA2G4	11	1	0	3	16	8	-0.374	0.109	1	0	1.8722	0.0060605	1	1	0.619	0.393907	1	0	-0.713443	1.14958e-10	1	1	-0.142	0.0632	1	0	-0.346109	0.00184339	1	1	0.510339	0.0839996	1	0	-0.54	0.0018	1	1	-0.355371	0.0305075	1	1	-0.236785	0.00459436	1	1
22	protein_coding	ENSG00000128340	RAC2	11	0	0	4	16	8	0.847	0.00216	1	1	2.61992	0.0004601	1	1	-1.13	0.008257	1	1	-1.68257	3.95918e-30	1	1	-0.317	0.000498	1	1	-0.367769	0.0011532	1	1	0.311408	0.419442	1	0	-0.133	0.384	1	0	-0.446298	0.00839432	1	1	-0.302245	0.00662904	1	1
8	protein_coding	ENSG00000147509	RGS20	11	1	0	10	16	8	0.559	0.00563	1	1	0.803787	0.0053926	1	1	-2.06	0.002089	1	1	-1.76171	1.85477e-34	1	1	-0.36	1.16e-05	1	1	-0.368006	0.00138454	1	1	0.852292	0.129608	1	0	-0.517	0.00147	1	1	-0.156491	0.59169	1	0	0.00375634	0.984569	1	0
2	protein_coding	ENSG00000115884	SDC1	11	0	1	11	16	8	0.497	0.00881	1	1	0.531416	0.0384365	1	1	-0.736	0.015494	1	1	-0.638821	1.34999e-11	1	1	-0.21	0.0035	1	1	-0.413613	0.0014216	1	1	-0.0441018	0.914831	1	0	-1.55	1.61e-05	1	1	-1.19842	1.19759e-26	1	1	-1.19996	8.43755e-113	1	1
1	protein_coding	ENSG00000175793	SFN	11	1	1	12	16	8	0.582	0.000774	1	1	0.849043	0.0134456	1	1	-1.17	0.013485	1	1	-1.10422	6.59929e-30	1	1	-0.111	0.603	1	0	-0.598955	0.00024646	1	1	2.16868	1.0832e-09	1	1	-0.751	0.000293	1	1	0.237973	0.1996	1	0	0.0855104	0.210347	1	0
6	protein_coding	ENSG00000112759	SLC29A1	11	0	0	-8	15	8	0.43	0.0569	1	0	0.61751	0.0169991	1	1	0.0476	0.869257	1	0	-0.924492	2.136e-06	1	1	---	---	0	0	0.241128	0.0135888	1	-1	1.23793	7.98881e-05	1	1	-1.74	5.46e-06	1	1	-0.564847	0.00196006	1	1	-0.85413	4.09515e-11	1	1
7	protein_coding	ENSG00000164543	STK17A	11	1	1	8	16	8	0.357	0.198	1	0	0.701447	0.0165436	1	1	0.503	0.067277	1	0	-1.39803	1.31035e-35	1	1	-0.221	0.0382	1	1	-0.30254	0.00307061	1	1	-0.516685	0.0872241	1	0	-0.543	0.00335	1	1	-0.739267	1.95134e-06	1	1	-0.482	7.55591e-11	1	1
2	protein_coding	ENSG00000163032	VSNL1	11	1	1	2	15	7	1.02	0.00079	1	1	1.79793	0.0007702	1	1	-2.16	0.002266	1	1	-2.73527	2.86857e-26	1	1	-0.411	0.0982	1	0	-0.983935	0.0001139	1	1	---	---	0	0	-1.12	4.13e-05	1	1	-0.725791	0.0205621	1	1	-0.523295	0.0212803	1	1
2	protein_coding	ENSG00000163219	ARHGAP25	10	1	1	2	14	6	1.13	0.000446	1	1	0.936403	0.0182417	1	1	-0.965	0.048518	1	1	-2.15804	1.74163e-13	1	1	-0.0361	0.609	1	0	-0.102245	0.209737	1	0	6.09122	5.91881e-16	1	1	-0.623	0.00305	1	1	-3.18035	0.000636197	1	1	-3.75706	1.38389e-11	1	1
10	protein_coding	ENSG00000154473	BUB3	10	0	0	-5	16	8	-0.271	0.053	1	0	1.31005	0.0009956	1	1	-1.29	0.021812	1	1	-1.09724	1.01554e-24	1	1	-0.028	0.808	1	0	-0.315054	0.00234452	1	1	0.201462	0.571492	1	0	-0.94	0.000151	1	1	-0.796626	9.70149e-10	1	1	-0.796515	4.03566e-30	1	1
8	protein_coding	ENSG00000104267	CA2	10	0	0	-1	14	6	1.55	1.79e-05	1	1	0.0748579	0.686586	1	0	-2.47	0.001337	1	1	0.178795	0.238744	1	0	-1.79	4.29e-07	1	1	-1.48854	2.377e-05	1	1	---	---	0	0	0.258	0.0769	1	0	-1.00164	7.8446e-05	1	1	-1.15151	8.2399e-22	1	1
1	protein_coding	ENSG00000118200	CAMSAP2	10	0	0	-1	15	8	-0.242	0.119	1	0	0.854099	0.0222003	1	1	-1.79	0.005844	1	1	-1.13925	2.4346e-34	1	1	---	---	0	0	-0.196378	0.0124618	1	1	0.578961	0.0539853	1	0	-0.645	0.00243	1	1	-0.661468	1.32835e-06	1	1	-0.557613	5.78557e-18	1	1
14	protein_coding	ENSG00000170779	CDCA4	10	1	1	-14	16	8	0.556	0.00154	1	1	-0.260946	0.198505	1	0	-0.821	0.027372	1	1	-1.22963	3.05581e-23	1	1	0.0507	0.584	1	0	0.110839	0.146	1	0	0.216432	0.555992	1	0	-0.664	0.000473	1	1	-1.0471	3.66946e-07	1	1	-1.26867	3.47682e-25	1	1
9	protein_coding	ENSG00000136943	CTSV	10	0	0	0	16	8	0.532	0.0051	1	1	1.52095	0.0058505	1	1	-0.282	0.545767	1	0	-1.98491	3.44747e-83	1	1	-0.606	5.37e-05	1	1	0.817379	0.00010091	1	-1	1.2914	0.00118651	1	1	-0.749	0.00139	1	1	-1.6004	8.42948e-09	1	1	-1.76739	7.62421e-20	1	1
2	protein_coding	ENSG00000144048	DUSP11	10	1	0	12	16	8	0.223	0.163	1	0	1.07322	0.0032943	1	1	-0.674	0.033782	1	1	-0.706175	3.00141e-07	1	1	-0.198	0.00171	1	1	-0.293925	0.00494462	1	1	-0.281534	0.497351	1	0	-0.275	0.0391	1	1	-0.267983	0.281365	1	0	-0.220344	0.124115	1	0
5	protein_coding	ENSG00000086570	FAT2	10	1	0	0	15	7	0.662	0.00165	1	1	0.479144	0.0706687	1	0	-0.851	0.023519	1	1	-1.64174	5.11412e-67	1	1	-0.133	0.302	1	0	0.0274962	0.66759	1	0	5.81894	1.42684e-29	1	1	-1.72	1.55e-05	1	1	-0.257049	0.154967	1	0	-0.3381	5.21992e-05	1	1
20	protein_coding	ENSG00000101311	FERMT1	10	1	1	5	16	8	0.716	0.000709	1	1	2.8408	0.0002173	1	1	0.364	0.369636	1	0	-1.21333	4.30204e-29	1	1	-0.437	3.52e-05	1	1	-0.553895	0.00059028	1	1	2.25039	1.20577e-10	1	1	-0.83	0.000157	1	1	-0.187035	0.209578	1	0	-0.13236	0.0695346	1	0
22	protein_coding	ENSG00000075218	GTSE1	10	0	0	-18	16	8	0.668	0.00386	1	1	1.21573	0.001233	1	1	-0.728	0.064911	1	0	-2.27201	4.41326e-24	1	1	-0.625	0.000709	1	1	0.11795	0.141491	1	0	-0.484757	0.45594	1	0	-1.82	5.46e-06	1	1	-1.82462	5.39036e-19	1	1	-2.35271	1.68933e-49	1	1
16	protein_coding	ENSG00000077238	IL4R	10	1	1	8	16	8	0.759	0.0113	1	1	1.59408	0.0007031	1	1	-0.552	0.120017	1	0	-2.25181	3.04858e-81	1	1	-0.0609	0.599	1	0	0.418517	0.00219573	1	-1	0.597075	0.018934	1	1	-0.827	0.000154	1	1	-0.583673	0.000137644	1	1	-0.362617	7.29963e-05	1	1
2	protein_coding	ENSG00000151689	INPP1	10	1	1	16	15	7	-0.337	0.244	1	0	0.765887	0.0131453	1	1	0.273	0.355818	1	0	-0.508151	0.0761935	1	0	-0.203	0.00886	1	1	-0.579624	0.00059211	1	1	0.841391	0.000626284	1	1	-0.315	0.0298	1	1	-0.582143	0.0320646	1	1	-0.413279	0.00754372	1	1
1	protein_coding	ENSG00000117595	IRF6	10	0	1	3	16	8	0.522	0.0413	1	1	-1.45781	0.0007082	1	-1	-2.59	0.002566	1	1	-1.57702	4.97797e-76	1	1	-0.433	0.000499	1	1	-0.41963	0.00064683	1	1	4.42609	0.000152733	1	1	-0.576	0.00127	1	1	0.116521	0.497759	1	0	0.0676652	0.413299	1	0
2	protein_coding	ENSG00000091409	ITGA6	10	0	1	7	16	8	0.498	0.0295	1	1	2.98905	0.0003061	1	1	-1.08	0.319709	1	0	-1.30602	4.54295e-46	1	1	-0.426	1.57e-05	1	1	0.0984895	0.127889	1	0	1.02641	0.00188866	1	1	-1.44	1.14e-05	1	1	-0.383965	0.00351075	1	1	-0.24583	4.34252e-06	1	1
20	protein_coding	ENSG00000088970	KIZ	10	1	0	0	16	8	1.62	1.04e-05	1	1	1.36111	0.002815	1	1	-0.92	0.029605	1	1	-0.278536	0.391505	1	0	-0.296	0.000105	1	1	-0.25435	0.00844463	1	1	1.41631	7.03792e-06	1	1	-0.947	0.000117	1	1	-0.688776	0.00818669	1	1	-0.576475	0.000417213	1	1
15	protein_coding	ENSG00000137802	MAPKBP1	10	0	1	6	15	8	0.509	0.00418	1	1	0.6319	0.0204841	1	1	-0.681	0.072981	1	0	-0.96246	3.01277e-13	1	1	---	---	0	0	-0.217231	0.024177	1	1	1.62508	3.77142e-12	1	1	-0.376	0.00925	1	1	-0.179948	0.489842	1	0	-0.475417	0.000247827	1	1
1	protein_coding	ENSG00000116141	MARK1	10	0	0	-2	15	7	0.421	0.0133	1	1	0.406591	0.0789779	1	0	-0.673	0.035143	1	1	-0.584979	0.000820097	1	1	-0.0706	0.0506	1	0	-0.263449	0.012831	1	1	0.159762	0.85675	1	0	-0.0942	0.642	1	0	-0.679524	0.00622205	1	1	-0.498879	0.00467909	1	1
5	protein_coding	ENSG00000145555	MYO10	10	1	1	-3	16	8	0.643	0.00183	1	1	1.04321	0.0213508	1	1	1.1	0.00818	1	-1	-1.22348	2.26204e-33	1	1	0.104	0.593	1	0	0.106348	0.109411	1	0	0.808989	0.00966629	1	1	-0.458	0.00306	1	1	-0.388617	0.0144162	1	1	-0.291755	0.00142363	1	1
17	protein_coding	ENSG00000278259	MYO19	10	1	1	-9	15	8	0.0826	0.491	1	0	0.0949563	0.729761	1	0	-0.342	0.382592	1	0	-0.691942	3.28508e-09	1	1	---	---	0	0	0.047438	0.499897	1	0	0.70557	0.00565532	1	1	-0.864	0.000151	1	1	-0.32729	0.0452697	1	1	-0.696801	2.20536e-13	1	1
1	protein_coding	ENSG00000085840	ORC1	10	0	1	-14	16	8	0.644	0.0426	1	1	-0.523236	0.0543282	1	0	-0.518	0.109328	1	0	-1.98491	1.74181e-16	1	1	-0.253	0.00672	1	1	0.144816	0.105589	1	0	0.582757	0.173085	1	0	-1.21	0.00165	1	1	-0.604116	0.00875956	1	1	-1.65644	1.25636e-16	1	1
11	protein_coding	ENSG00000149269	PAK1	10	1	0	-4	16	8	0.459	0.0409	1	1	-1.60439	0.0022597	1	-1	-0.714	0.027119	1	1	-0.708436	7.0494e-09	1	1	-0.02	0.86	1	0	-0.411522	0.00066072	1	1	0.820793	0.000663958	1	1	-0.768	0.000347	1	1	-0.461322	0.00965696	1	1	-0.449158	4.59664e-06	1	1
12	protein_coding	ENSG00000087494	PTHLH	10	1	1	0	16	8	2.54	1.04e-05	1	1	1.94746	0.0003238	1	1	0.803	0.022266	1	-1	-3.23944	7.51424e-118	1	1	-0.771	2.25e-05	1	1	0.644588	0.00044585	1	-1	1.45942	0.0284561	1	1	-0.512	0.00696	1	1	-1.43935	0.000224641	1	1	-1.04242	0.0014652	1	1
13	protein_coding	ENSG00000133119	RFC3	10	0	0	-18	16	8	0.564	0.00327	1	1	0.794937	0.0204783	1	1	0.669	0.172545	1	0	-0.530511	0.0072315	1	1	-0.378	0.000769	1	1	0.060763	0.411462	1	0	-0.123188	0.77552	1	0	-1.14	2.61e-05	1	1	-1.15235	1.78386e-11	1	1	-1.7371	2.27205e-41	1	1
14	protein_coding	ENSG00000100784	RPS6KA5	10	0	0	2	16	8	1.33	0.000419	1	1	-0.71173	0.0134865	1	-1	-2.32	0.002188	1	1	-1.18192	1.34536e-06	1	1	-0.201	0.00076	1	1	-0.712979	0.00027274	1	1	1.61044	0.0026273	1	1	-0.508	0.00303	1	1	-1.09586	0.0150296	1	1	-1.19706	7.69627e-06	1	1
22	protein_coding	ENSG00000183963	SMTN	10	1	0	10	16	8	1.73	0.000143	1	1	2.44501	0.0002769	1	1	-0.902	0.022153	1	1	-2.46599	1.75901e-157	1	1	0.0201	0.759	1	0	0.121088	0.11452	1	0	0.580615	0.0573782	1	0	-0.816	0.000197	1	1	-0.35986	0.0363417	1	1	-0.356491	0.000108612	1	1
6	protein_coding	ENSG00000096063	SRPK1	10	0	0	-6	16	8	-0.195	0.168	1	0	1.22609	0.0011152	1	1	0.67	0.027187	1	-1	-0.390547	0.000268133	1	1	-0.342	0.00608	1	1	-0.192387	0.0161753	1	1	0.568828	0.0220781	1	1	-0.295	0.0253	1	1	-0.776496	1.84974e-06	1	1	-0.643147	7.12888e-18	1	1
13	protein_coding	ENSG00000139668	WDFY2	10	1	0	-1	14	8	---	---	0	0	-0.897226	0.0079216	1	-1	-1.76	0.002266	1	1	-1.41465	3.56609e-31	1	1	-0.338	8.73e-05	1	1	-0.228937	0.00801009	1	1	1.36931	8.04487e-09	1	1	---	---	0	0	-0.158076	0.424674	1	0	-0.256766	0.011241	1	1
2	protein_coding	ENSG00000158125	XDH	10	1	1	5	16	8	-0.0706	0.761	1	0	0.845485	0.0077902	1	1	-1.1	0.021096	1	1	-3.54396	4.88622e-215	1	1	-0.152	0.0149	1	1	-0.0707692	0.390285	1	0	-0.6684	0.122433	1	0	-1.29	7.38e-05	1	1	-1.17152	3.82564e-17	1	1	-0.941966	1.32546e-24	1	1
6	protein_coding	ENSG00000120437	ACAT2	9	0	0	-3	16	8	1.06	0.00195	1	1	0.904089	0.0028212	1	1	-0.198	0.440995	1	0	-0.565421	6.33256e-07	1	1	0.308	0.00125	1	-1	-0.623891	0.00026487	1	1	0.84868	0.00144597	1	1	-0.505	0.0027	1	1	-0.546001	2.31509e-05	1	1	-0.397281	3.57497e-09	1	1
12	protein_coding	ENSG00000111348	ARHGDIB	9	1	1	0	16	8	2.88	4.56e-06	1	1	3.20053	0.0001318	1	1	0.786	0.050068	1	0	-1.14305	1.80924e-15	1	1	0.365	0.00101	1	-1	-0.899454	0.00024111	1	1	3.17856	2.03882e-17	1	1	-0.913	9.55e-05	1	1	-1.05903	1.37652e-10	1	1	-1.17616	1.77102e-28	1	1
19	protein_coding	ENSG00000105011	ASF1B	9	0	0	-12	16	8	0.676	0.00263	1	1	0.441609	0.0548853	1	0	0.417	0.171922	1	0	-1.80111	1.52236e-17	1	1	-0.236	0.0157	1	1	-0.0187283	0.765544	1	0	0.577112	0.0292185	1	1	-1.28	1.83e-05	1	1	-1.05522	1.3323e-09	1	1	-1.61965	3.1401e-31	1	1
17	protein_coding	ENSG00000178999	AURKB	9	1	0	-18	16	8	0.0562	0.869	1	0	0.621124	0.0117708	1	1	-0.908	0.009159	1	1	-2.31964	1.21623e-37	1	1	-0.0376	0.766	1	0	0.0802539	0.324603	1	0	-0.444939	0.271359	1	0	-1.89	4.91e-06	1	1	-1.42174	3.33354e-17	1	1	-2.09933	1.73062e-59	1	1
12	protein_coding	ENSG00000151136	BTBD11	9	1	0	5	13	8	---	---	0	0	0.817533	0.0049319	1	1	-1.64	0.025932	1	1	-1.54364	3.96153e-20	1	1	---	---	0	0	-0.638563	0.00053299	1	1	4.15121	1.31465e-12	1	1	---	---	0	0	-1.18152	0.00413758	1	1	-0.295175	0.363301	1	0
6	protein_coding	ENSG00000196821	C6orf106	9	1	0	0	16	8	0.256	0.034	1	1	1.02333	0.0036876	1	1	-0.723	0.236081	1	0	-1.02077	2.36273e-31	1	1	0.0893	0.351	1	0	-0.548143	0.00034744	1	1	0.219359	0.485238	1	0	-0.473	0.0077	1	1	-0.54086	0.000144792	1	1	-0.357137	8.49795e-06	1	1
22	protein_coding	ENSG00000100065	CARD10	9	1	1	2	16	8	0.426	0.0046	1	1	-1.00338	0.0043233	1	-1	-0.576	0.140235	1	0	-2.61564	5.7343e-107	1	1	-0.0836	0.187	1	0	-0.0310458	0.65962	1	0	2.33331	3.10501e-14	1	1	-0.991	0.000169	1	1	-0.78891	1.09081e-06	1	1	-0.729956	3.86643e-09	1	1
11	protein_coding	ENSG00000137752	CASP1	9	0	0	5	16	8	1.1	0.000151	1	1	2.31235	0.0009756	1	1	0.708	0.029867	1	-1	-0.467782	0.0194708	1	1	-0.169	0.549	1	0	-1.0761	0.00020722	1	1	2.04731	9.06706e-08	1	1	-0.569	0.00188	1	1	0.0341531	0.927347	1	0	0.0842172	0.664394	1	0
13	protein_coding	ENSG00000151849	CENPJ	9	0	0	-12	16	8	0.765	0.000746	1	1	0.247386	0.186691	1	0	-0.423	0.286323	1	0	-1.12294	4.32031e-07	1	1	-0.192	0.0432	1	1	0.155275	0.0855384	1	0	-0.16795	0.70774	1	0	-0.421	0.0182	1	1	-0.874026	1.73411e-07	1	1	-1.35407	2.64303e-29	1	1
19	protein_coding	ENSG00000167670	CHAF1A	9	0	1	-15	16	8	0.301	0.0253	1	1	0.604409	0.0122067	1	1	0.151	0.508941	1	0	-0.50655	0.000314431	1	1	-0.112	0.0325	1	1	0.281556	0.0180155	1	-1	0.265338	0.433432	1	0	-0.62	0.00214	1	1	-0.554573	0.00180207	1	1	-1.24995	2.10071e-23	1	1
17	protein_coding	ENSG00000176390	CRLF3	9	0	0	-3	16	8	0.0684	0.731	1	0	1.01192	0.003548	1	1	-0.685	0.036121	1	1	-0.848352	3.59278e-07	1	1	-0.00427	0.964	1	0	-0.214006	0.0133154	1	1	-0.138094	0.771226	1	0	-0.349	0.0118	1	1	-0.710351	0.00196678	1	1	-0.529567	0.000553345	1	1
3	protein_coding	ENSG00000121552	CSTA	9	1	0	10	15	7	0.704	0.00314	1	1	0.0232609	0.913192	1	0	-0.175	0.466568	1	0	-0.152048	0.144503	1	0	-0.814	0.000648	1	1	-1.0279	7.626e-05	1	1	4.42737	3.88802e-06	1	1	-0.445	0.00331	1	1	-0.162773	0.41636	1	0	0.0777547	0.556202	1	0
12	protein_coding	ENSG00000111012	CYP27B1	9	1	0	-3	16	8	0.484	0.00524	1	1	2.31637	0.0001996	1	1	-0.186	0.498141	1	0	-3.40198	6.61814e-56	1	1	-0.0861	0.27	1	0	0.217016	0.0403831	1	-1	1.54169	0.000498925	1	1	-0.764	0.000234	1	1	-0.647812	0.0104853	1	1	-0.733355	6.94279e-05	1	1
19	protein_coding	ENSG00000171903	CYP4F11	9	0	0	7	15	7	0.666	0.00109	1	1	0.0951777	0.605242	1	0	-0.46	0.07071	1	0	-2.87896	4.07517e-05	1	1	-0.0268	0.661	1	0	-0.397743	0.0115493	1	1	---	---	0	0	-0.478	0.0323	1	1	-0.669212	0.0113217	1	1	-0.568062	0.000300163	1	1
10	protein_coding	ENSG00000165732	DDX21	9	0	0	-7	16	8	-0.279	0.0366	1	-1	1.53743	0.00045	1	1	1.25	0.00512	1	-1	-0.524023	0.000135996	1	1	-0.531	0.00593	1	1	-0.147283	0.0808453	1	0	0.377888	0.242763	1	0	-0.215	0.0772	1	0	-0.837754	4.34801e-09	1	1	-0.614171	3.47837e-29	1	1
19	protein_coding	ENSG00000130816	DNMT1	9	0	0	-13	16	8	0.376	0.0101	1	1	0.670293	0.0179336	1	1	0.644	0.046238	1	-1	-0.982086	1.25952e-19	1	1	-0.735	0.000352	1	1	0.129898	0.0815216	1	0	-0.00239409	0.996598	1	0	-0.522	0.0019	1	1	-0.669227	1.85589e-07	1	1	-0.944851	1.61194e-36	1	1
11	protein_coding	ENSG00000168496	FEN1	9	0	0	-13	16	8	0.911	0.000755	1	1	2.32175	0.0001775	1	1	1.71	0.002128	1	-1	-0.536144	0.000103672	1	1	-0.503	2.95e-05	1	1	0.103591	0.17113	1	0	0.283501	0.368862	1	0	-0.813	0.000198	1	1	-0.785681	2.25873e-08	1	1	-1.45366	8.94246e-55	1	1
11	protein_coding	ENSG00000149557	FEZ1	9	1	1	10	14	7	1.78	0.000289	1	1	1.36873	0.0006882	1	1	-2.22	0.030316	1	1	-3.57564	1.53771e-131	1	1	---	---	0	0	-0.0883097	0.447948	1	0	2.15637	2.40279e-23	1	1	-0.127	0.457	1	0	-1.88755	0.10061	1	0	-1.51699	0.00469807	1	1
12	protein_coding	ENSG00000111206	FOXM1	9	0	0	-17	16	8	0.222	0.357	1	0	-0.26824	0.307543	1	0	-0.465	0.239843	1	0	-2.3456	3.90937e-46	1	1	0.0234	0.895	1	0	-0.450535	0.00060385	1	1	-0.670477	0.14855	1	0	-1.99	4.36e-06	1	1	-1.42647	4.62312e-25	1	1	-1.80879	1.9135e-90	1	1
1	protein_coding	ENSG00000023909	GCLM	9	0	0	1	16	8	0.344	0.0975	1	0	-0.307637	0.386443	1	0	0.803	0.085654	1	0	0.177084	0.571521	1	0	-0.328	0.00353	1	1	-0.24006	0.0261739	1	1	0.797099	0.000702288	1	1	-0.512	0.00366	1	1	-0.902887	1.6021e-06	1	1	-0.536593	2.75887e-07	1	1
19	protein_coding	ENSG00000060558	GNA15	9	1	0	2	16	8	0.662	0.0182	1	1	0.13762	0.64756	1	0	-1.21	0.022976	1	1	-1.33496	8.32576e-47	1	1	-0.0295	0.825	1	0	-0.178522	0.0188167	1	1	1.12086	0.327312	1	0	-0.963	6.86e-05	1	1	-0.441558	0.00734373	1	1	-0.40049	1.77437e-05	1	1
14	protein_coding	ENSG00000176153	GPX2	9	1	0	-3	14	6	0.517	0.0057	1	1	2.17635	0.014359	1	1	-1.36	0.163006	1	0	-3.42379	0.0127488	1	1	-0.111	0.658	1	0	-0.920018	0.00011171	1	1	3.71733	0.243146	1	0	-0.14	0.326	1	0	---	---	0	0	---	---	0	0
11	protein_coding	ENSG00000084207	GSTP1	9	1	0	4	16	8	0.212	0.083	1	0	0.429618	0.0450588	1	1	-0.674	0.044383	1	1	-0.830263	2.68323e-22	1	1	-0.00977	0.983	1	0	-0.182269	0.015152	1	1	0.825693	0.000299784	1	1	-0.273	0.0299	1	1	-0.163934	0.238426	1	0	0.0605982	0.45742	1	0
4	protein_coding	ENSG00000164032	H2AFZ	9	0	0	-13	16	8	0.241	0.0701	1	0	1.06005	0.0095317	1	1	0.312	0.444566	1	0	-1.43851	1.65823e-47	1	1	-0.666	3.33e-05	1	1	-0.34608	0.00220626	1	1	-0.744599	0.00321896	1	-1	-0.954	8.03e-05	1	1	-1.40698	7.1888e-30	1	1	-1.45105	1.17821e-90	1	1
11	protein_coding	ENSG00000174775	HRAS	9	1	1	10	16	8	-0.309	0.329	1	0	0.513175	0.0353966	1	1	-0.551	0.055796	1	0	-1.23716	8.92594e-30	1	1	-0.195	0.0295	1	1	-0.150745	0.0572486	1	0	0.168086	0.728988	1	0	-0.598	0.0019	1	1	-0.383901	0.0437949	1	1	-0.177528	0.138926	1	0
14	protein_coding	ENSG00000080824	HSP90AA1	9	0	0	-5	16	8	0.614	0.000982	1	1	1.11781	0.0018303	1	1	-1.47	0.241444	1	0	-2.62359	7.54985e-178	1	1	-0.188	0.457	1	0	0.0451015	0.550561	1	0	0.0849623	0.822365	1	0	-0.826	0.000138	1	1	-0.674828	2.61548e-07	1	1	-0.582133	4.93341e-29	1	1
1	protein_coding	ENSG00000163565	IFI16	9	1	1	3	16	8	0.571	0.0018	1	1	0.782049	0.0103331	1	1	0.518	0.061972	1	0	0.111632	0.40876	1	0	-0.692	4.76e-06	1	1	-0.314137	0.00155706	1	1	0.175184	0.763217	1	0	-0.984	6.92e-05	1	1	-0.479352	0.00114833	1	1	-0.393017	9.50404e-06	1	1
2	protein_coding	ENSG00000115008	IL1A	9	0	0	2	16	8	0.785	0.000249	1	1	-0.660831	0.0264685	1	-1	-3.69	0.001311	1	1	-2.6992	2.30679e-117	1	1	-0.761	0.0537	1	0	1.46209	4.619e-05	1	-1	4.17996	1.64134e-18	1	1	-0.928	0.000393	1	1	-0.289842	0.183142	1	0	-0.387764	3.18679e-09	1	1
22	protein_coding	ENSG00000183762	KREMEN1	9	1	1	4	14	8	---	---	0	0	1.51946	0.0008819	1	1	-0.897	0.041237	1	1	-0.470245	1.32448e-05	1	1	-0.0453	0.512	1	0	0.0187459	0.848087	1	0	1.85784	1.82802e-06	1	1	---	---	0	0	-0.572476	0.00532745	1	1	-0.702001	3.45867e-07	1	1
19	protein_coding	ENSG00000130164	LDLR	9	1	0	-6	16	8	0.837	0.000601	1	1	1.69485	0.0005038	1	1	-1.04	0.006825	1	1	-1.4416	2.81191e-44	1	1	0.16	0.457	1	0	-0.120067	0.0969729	1	0	0.664025	0.0252291	1	1	-0.279	0.0402	1	1	-0.569434	1.78299e-05	1	1	-0.450883	5.27e-14	1	1
1	protein_coding	ENSG00000157193	LRP8	9	0	0	-12	16	8	0.0456	0.734	1	0	0.840588	0.0055946	1	1	0.471	0.296267	1	0	-2.38128	3.05254e-32	1	1	0.0511	0.559	1	0	0.12712	0.11256	1	0	0.0513886	0.926641	1	0	-0.601	0.0025	1	1	-0.635766	7.36744e-06	1	1	-0.73116	8.30366e-18	1	1
15	protein_coding	ENSG00000069956	MAPK6	9	1	1	1	16	8	0.0923	0.736	1	0	-0.264094	0.232719	1	0	-0.756	0.031809	1	1	-0.265463	0.00707108	1	1	-0.825	1.57e-06	1	1	-0.173239	0.101898	1	0	0.605514	0.0941541	1	0	-0.518	0.00154	1	1	-0.493557	0.00124882	1	1	-0.255544	0.00166532	1	1
14	protein_coding	ENSG00000100714	MTHFD1	9	0	0	-12	16	8	-0.24	0.405	1	0	0.213713	0.317153	1	0	0.552	0.053068	1	0	-1.14497	4.21261e-21	1	1	-0.206	0.0378	1	1	-0.262008	0.0049501	1	1	-0.304622	0.331241	1	0	-0.432	0.00538	1	1	-0.291927	0.0491562	1	1	-0.483596	4.87237e-10	1	1
15	protein_coding	ENSG00000197535	MYO5A	9	0	1	8	16	8	-0.0809	0.659	1	0	1.11457	0.0143243	1	1	-1.08	0.007637	1	1	-0.356303	0.000465469	1	1	-0.00518	0.964	1	0	-0.390607	0.00150538	1	1	0.297945	0.357487	1	0	0.0219	0.917	1	0	-0.654723	2.05281e-05	1	1	-0.496808	1.01545e-08	1	1
22	protein_coding	ENSG00000025770	NCAPH2	9	1	0	-12	16	8	0.272	0.178	1	0	0.430345	0.0455563	1	1	-0.47	0.10224	1	0	-0.426101	0.00329512	1	1	-0.179	0.0212	1	1	0.120198	0.282044	1	0	0.177465	0.665794	1	0	-0.68	0.000444	1	1	-0.920307	3.8496e-06	1	1	-1.11315	9.97764e-17	1	1
16	protein_coding	ENSG00000072864	NDE1	9	1	1	-4	16	8	0.389	0.00441	1	1	-1.5542	0.0017624	1	-1	-1.14	0.005072	1	1	-2.05978	1.42962e-74	1	1	0.00277	0.985	1	0	-0.305483	0.00423711	1	1	0.342139	0.462579	1	0	-0.88	0.000312	1	1	-0.551387	0.00456112	1	1	-0.470163	0.000221502	1	1
5	TEC	ENSG00000070614	NDST1	9	1	1	0	16	8	0.259	0.3	1	0	0.630643	0.0171011	1	1	-0.238	0.431955	1	0	-0.345365	0.000329011	1	1	-0.119	0.0515	1	0	-0.0897861	0.22042	1	0	0.564382	0.0374234	1	1	-0.28	0.042	1	1	-0.345724	0.0148684	1	1	-0.26698	0.000221679	1	1
5	protein_coding	ENSG00000172548	NIPAL4	9	1	1	4	12	7	---	---	0	0	0.639889	0.0377733	1	1	-3.54	0.001557	1	1	-3.45233	3.40307e-138	1	1	---	---	0	0	-0.0255746	0.743538	1	0	2.18105	7.84104e-06	1	1	---	---	0	0	-1.65912	0.00136108	1	1	-1.5347	4.0011e-06	1	1
10	protein_coding	ENSG00000166197	NOLC1	9	0	0	-13	15	8	-0.112	0.457	1	0	1.69321	0.0003643	1	1	1.33	0.003479	1	-1	-0.936276	3.83266e-14	1	1	---	---	0	0	-0.16313	0.0455146	1	1	0.417148	0.198478	1	0	-0.204	0.0873	1	0	-0.424	0.00234335	1	1	-0.421838	1.28872e-11	1	1
9	protein_coding	ENSG00000148400	NOTCH1	9	0	0	10	16	8	-0.38	0.0884	1	0	-1.21852	0.0085755	1	-1	-1.08	0.028089	1	1	-1.89326	2.23258e-88	1	1	-0.145	0.0471	1	1	-0.357767	0.0138856	1	1	1.12658	0.00295348	1	1	0.0216	0.908	1	0	-0.565898	0.00429143	1	1	-0.519879	1.71753e-12	1	1
12	protein_coding	ENSG00000139289	PHLDA1	9	0	0	6	16	8	0.344	0.0142	1	1	1.81161	0.0026622	1	1	-2.34	0.00719	1	1	-3.37781	1.61215e-290	1	1	-0.176	0.261	1	0	-0.0523842	0.397258	1	0	0.696004	0.210365	1	0	-1.26	2.46e-05	1	1	-1.21026	2.24666e-14	1	1	-0.726794	1.65041e-24	1	1
22	protein_coding	ENSG00000180957	PITPNB	9	0	0	-2	16	8	-0.332	0.275	1	0	0.683264	0.0090462	1	1	0.424	0.091808	1	0	-0.451016	0.000837337	1	1	-0.186	0.23	1	0	-0.265423	0.00675665	1	1	0.0226542	0.957596	1	0	-0.00934	0.955	1	0	-0.405387	0.00369113	1	1	-0.247675	0.00156562	1	1
9	protein_coding	ENSG00000148229	POLE3	9	0	0	-12	16	8	-0.267	0.251	1	0	0.25809	0.167054	1	0	0.516	0.113452	1	0	0.211895	0.123035	1	0	-0.302	0.00209	1	1	-0.358653	0.00229442	1	1	0.0362025	0.932798	1	0	-0.291	0.0481	1	1	-0.651983	7.12958e-05	1	1	-0.68498	2.85573e-13	1	1
10	protein_coding	ENSG00000108179	PPIF	9	0	1	-5	16	8	-0.283	0.109	1	0	4.21855	5.36e-05	1	1	-0.872	0.010399	1	1	-4.09295	5.46164e-250	1	1	-0.485	0.0318	1	1	-0.17069	0.0581874	1	0	1.04705	0.00625681	1	1	-0.448	0.00292	1	1	-0.0839977	0.686585	1	0	-0.25173	0.00727903	1	1
14	protein_coding	ENSG00000119698	PPP4R4	9	1	0	-2	14	6	0.396	0.00467	1	1	1.84431	0.0005876	1	1	-1.41	0.004132	1	1	-2.79119	2.52464e-17	1	1	-0.0307	0.75	1	0	-0.0401052	0.651084	1	0	4.05768	1.32382e-13	1	1	0.158	0.266	1	0	-0.0641908	0.980896	1	0	---	---	0	0
5	protein_coding	ENSG00000164611	PTTG1	9	1	1	-11	16	8	0.638	0.000927	1	1	-1.42021	0.0010855	1	-1	-1.64	0.003577	1	1	-2.13895	3.35443e-44	1	1	-0.241	0.0025	1	1	-0.0910149	0.273568	1	0	-0.509708	0.200573	1	0	-1.63	1.34e-05	1	1	-1.10774	2.46502e-13	1	1	-1.02059	6.13779e-30	1	1
12	protein_coding	ENSG00000136045	PWP1	9	0	0	-4	16	8	-0.201	0.154	1	0	0.865052	0.0036966	1	1	-0.405	0.406014	1	0	-0.356676	0.0124269	1	1	-0.154	0.00668	1	1	-0.35142	0.00144447	1	1	-0.394532	0.158422	1	0	-0.147	0.212	1	0	-0.415245	0.0200575	1	1	-0.219864	0.0278941	1	1
7	protein_coding	ENSG00000136237	RAPGEF5	9	1	1	-2	15	8	0.733	0.0623	1	0	-2.49925	0.0002283	1	-1	-1.93	0.007974	1	1	-0.208287	0.434434	1	0	---	---	0	0	-0.257298	0.00446888	1	1	4.18529	3.97104e-06	1	1	-0.297	0.0356	1	1	-0.376025	0.230987	1	0	-0.54053	0.0119693	1	1
7	protein_coding	ENSG00000049541	RFC2	9	0	0	-13	16	8	0.143	0.515	1	0	0.478573	0.04519	1	1	0.412	0.126058	1	0	-0.0980818	0.656153	1	0	-0.164	0.0266	1	1	-0.142888	0.0710038	1	0	0.153548	0.709895	1	0	-0.851	0.000157	1	1	-0.783045	1.42498e-05	1	1	-1.04718	2.1904e-17	1	1
14	protein_coding	ENSG00000165799	RNASE7	9	1	1	4	12	6	---	---	0	0	2.86969	0.0001975	1	1	-3	0.001311	1	1	-9.63012	8.80708e-70	1	1	-0.0421	0.521	1	0	-0.196554	0.0510155	1	0	6.17051	5.41216e-06	1	1	---	---	0	0	-0.613128	0.289857	1	0	-0.600216	0.0279283	1	1
10	protein_coding	ENSG00000052749	RRP12	9	0	1	-1	16	8	-0.774	0.0111	1	-1	0.963626	0.0029335	1	1	0.919	0.015634	1	-1	-0.388565	0.0275278	1	1	-0.112	0.267	1	0	-0.0299543	0.770315	1	0	0.931023	0.0123477	1	1	-0.66	0.00102	1	1	-0.176182	0.396586	1	0	-0.25776	0.0138278	1	1
18	protein_coding	ENSG00000197641	SERPINB13	9	1	0	0	14	6	1.11	0.000177	1	1	2.6966	0.0001544	1	1	-1.37	0.003734	1	1	0.382289	0.00531136	1	-1	-0.362	0.0996	1	0	-0.491049	0.0005144	1	1	---	---	0	0	-1.38	2.5e-05	1	1	-0.769413	0.0720473	1	0	-0.826786	0.00166063	1	1
12	protein_coding	ENSG00000170545	SMAGP	9	0	0	-7	15	8	-0.225	0.209	1	0	1.06364	0.0110746	1	1	-0.355	0.352421	1	0	-0.40171	0.00455276	1	1	---	---	0	0	-0.684685	0.00018095	1	1	-0.469856	0.134541	1	0	-1.31	1.62e-05	1	1	-0.822785	0.00403044	1	1	-0.630539	0.00356368	1	1
4	protein_coding	ENSG00000145335	SNCA	9	0	1	-1	15	7	0.572	0.00226	1	1	-0.480546	0.102113	1	0	-1.25	0.043914	1	1	-0.537045	0.00766321	1	1	-0.0659	0.648	1	0	-0.858782	0.00022711	1	1	0.574193	0.51412	1	0	-0.908	0.000293	1	1	-0.391238	0.163964	1	0	-0.432203	0.0175179	1	1
8	protein_coding	ENSG00000171056	SOX7	9	0	0	3	13	7	---	---	0	0	0.31118	0.161256	1	0	-3.02	0.001868	1	1	-2.44931	3.23558e-13	1	1	-0.104	0.192	1	0	-0.294842	0.0158891	1	1	5.12062	8.53238e-10	1	1	---	---	0	0	-1.10529	4.63012e-08	1	1	-0.749839	2.7734e-07	1	1
1	protein_coding	ENSG00000135823	STX6	9	1	0	16	15	8	0.385	0.00415	1	1	1.13713	0.001266	1	1	-0.866	0.072981	1	0	-0.0748487	0.674246	1	0	---	---	0	0	-0.309777	0.0047317	1	1	0.090953	0.864371	1	0	-0.673	0.000383	1	1	-0.0871808	0.694472	1	0	0.140628	0.169247	1	0
20	protein_coding	ENSG00000124120	TTPAL	9	0	0	4	16	8	0.092	0.434	1	0	1.54737	0.0005654	1	1	-0.467	0.061105	1	0	-1.77254	5.24051e-67	1	1	0.0982	0.297	1	0	-0.368593	0.00086429	1	1	0.530449	0.0367459	1	1	0.0545	0.686	1	0	-0.724018	1.23418e-05	1	1	-0.59246	5.67849e-09	1	1
10	protein_coding	ENSG00000122952	ZWINT	9	0	0	-13	16	8	0.63	0.00283	1	1	0.149315	0.49688	1	0	0.573	0.068661	1	0	-0.707229	3.8764e-06	1	1	-0.206	0.035	1	1	0.0264695	0.758848	1	0	0.00294655	0.995698	1	0	-1.19	3.25e-05	1	1	-1.42073	6.6471e-19	1	1	-1.70821	3.34153e-59	1	1
17	protein_coding	ENSG00000131473	ACLY	8	0	0	-1	15	8	0.5	0.0351	1	1	2.53244	0.0007681	1	1	-1.28	0.003762	1	1	-0.901881	2.49293e-23	1	1	---	---	0	0	-0.622833	0.000343	1	1	0.0390549	0.928341	1	0	-0.368	0.00825	1	1	-0.220124	0.108059	1	0	-0.115003	0.103512	1	0
12	protein_coding	ENSG00000006831	ADIPOR2	8	0	0	-5	16	8	-0.0992	0.511	1	0	-0.19991	0.324598	1	0	-0.166	0.542127	1	0	-0.429693	1.53988e-05	1	1	-0.175	0.00237	1	1	-0.238173	0.00899451	1	1	0.484546	0.0969408	1	0	-0.404	0.0143	1	1	-0.354704	0.0205721	1	1	-0.276282	0.00049267	1	1
1	protein_coding	ENSG00000162433	AK4	8	0	1	3	16	8	-0.344	0.0152	1	-1	-1.48516	0.0013005	1	-1	-0.765	0.042042	1	1	0.0491934	0.791349	1	0	-0.0259	0.667	1	0	-0.679005	0.00023248	1	1	0.857161	0.0359699	1	1	-0.931	0.000782	1	1	-0.529979	0.000930436	1	1	-0.512095	3.66722e-07	1	1
10	protein_coding	ENSG00000264230	ANXA8L1	8	0	0	-1	14	7	0.525	0.0192	1	1	0.19196	0.315855	1	0	0.691	0.073503	1	0	0.538646	2.17587e-06	1	-1	---	---	0	0	-0.353572	0.00131166	1	1	2.81809	0.002562	1	1	-1.06	6.99e-05	1	1	-0.101401	0.613194	1	0	-0.155446	0.101006	1	0
17	protein_coding	ENSG00000275832	ARHGAP23	8	1	1	-1	13	8	---	---	0	0	0.536073	0.0337355	1	1	-0.72	0.037679	1	1	-2.63683	4.58578e-139	1	1	---	---	0	0	-0.8455	0.00023248	1	1	0.203424	0.524458	1	0	---	---	0	0	-0.588931	0.00227657	1	1	-0.467664	0.000911891	1	1
6	protein_coding	ENSG00000112249	ASCC3	8	1	1	16	16	8	-0.0585	0.703	1	0	0.6157	0.0300304	1	1	0.325	0.297913	1	0	-0.474435	2.41263e-05	1	1	-0.2	0.0568	1	0	-0.156169	0.0237098	1	1	0.115411	0.751068	1	0	0.153	0.237	1	0	-0.697587	1.612e-07	1	1	-0.394812	1.14733e-08	1	1
17	protein_coding	ENSG00000176208	ATAD5	8	0	0	-11	16	8	0.24	0.0393	1	1	0.485125	0.035111	1	1	-0.111	0.699537	1	0	-1.15626	4.0711e-07	1	1	-0.277	0.00483	1	1	0.199961	0.0237048	1	-1	0.617367	0.0829334	1	0	-0.117	0.537	1	0	-1.10291	9.92131e-06	1	1	-1.56444	6.33622e-13	1	1
12	protein_coding	ENSG00000110987	BCL7A	8	0	0	-1	16	8	-0.0441	0.826	1	0	0.723754	0.0647642	1	0	-0.659	0.213168	1	0	-0.844083	1.60739e-08	1	1	0.0318	0.709	1	0	-0.177499	0.0176178	1	1	1.67448	4.35686e-08	1	1	-0.413	0.00438	1	1	-0.370088	0.127212	1	0	-0.326045	0.0207154	1	1
5	protein_coding	ENSG00000145734	BDP1	8	0	0	1	14	8	---	---	0	0	0.760251	0.0156092	1	1	-0.431	0.307691	1	0	-0.028444	0.866645	1	0	-0.109	0.0328	1	1	0.0866816	0.216687	1	0	0.763212	0.00121005	1	1	---	---	0	0	-0.513717	0.00380521	1	1	-0.293663	0.00646004	1	1
17	protein_coding	ENSG00000012048	BRCA1	8	1	0	-16	16	8	0.613	0.00261	1	1	0.395812	0.0748177	1	0	0.612	0.089138	1	0	-1.39178	6.59838e-15	1	1	-0.256	0.0169	1	1	0.135792	0.0807935	1	0	0.518287	0.153129	1	0	-0.749	0.00045	1	1	-0.992485	1.85306e-09	1	1	-1.61007	6.03369e-44	1	1
11	protein_coding	ENSG00000148925	BTBD10	8	1	1	13	14	8	---	---	0	0	0.651343	0.0133062	1	1	0.0258	0.936997	1	0	-0.558854	2.88084e-06	1	1	0.126	0.0628	1	0	-0.478235	0.00135079	1	1	0.501914	0.0726021	1	0	---	---	0	0	-0.743099	9.94871e-07	1	1	-0.506999	1.01747e-09	1	1
4	protein_coding	ENSG00000145386	CCNA2	8	0	0	-19	16	8	0.431	0.0216	1	1	-1.97497	0.0088698	1	-1	-1.07	0.05269	1	0	-2.58606	1.47641e-66	1	1	-0.441	0.00157	1	1	-0.0360513	0.597446	1	0	-0.79504	0.115222	1	0	-1.76	6.89e-06	1	1	-2.10869	1.9929e-46	1	1	-2.35706	8.31026e-132	1	1
14	protein_coding	ENSG00000090061	CCNK	8	1	0	9	15	8	0.0185	0.883	1	0	0.472022	0.0427207	1	1	-0.323	0.278642	1	0	-0.812824	2.22954e-05	1	1	---	---	0	0	-0.306482	0.00500192	1	1	0.522406	0.0925211	1	0	-0.492	0.00298	1	1	-0.178277	0.417915	1	0	0.0521283	0.704398	1	0
2	protein_coding	ENSG00000115484	CCT4	8	1	0	0	16	8	-0.12	0.382	1	0	0.586577	0.0362457	1	1	-0.181	0.602885	1	0	-0.968718	1.723e-23	1	1	-0.275	0.183	1	0	-0.186776	0.0186155	1	1	-0.379349	0.194664	1	0	-0.294	0.0212	1	1	-0.395278	0.00344931	1	1	-0.285557	2.90769e-05	1	1
11	protein_coding	ENSG00000026508	CD44	8	1	1	6	16	8	1.25	0.00243	1	1	1.24658	0.0039891	1	1	-1.76	0.00479	1	1	-0.810261	2.73337e-15	1	1	-0.268	0.225	1	0	0.183666	0.0122115	1	-1	-0.26484	0.337632	1	0	-1.13	3.02e-05	1	1	-0.366305	0.00241078	1	1	-0.238497	1.82466e-05	1	1
1	protein_coding	ENSG00000197622	CDC42SE1	8	1	0	7	16	8	0.029	0.953	1	0	0.732291	0.0431932	1	1	0.53	0.061526	1	0	-0.398757	0.000254921	1	1	-0.265	0.0288	1	1	-0.0623839	0.394171	1	0	0.450854	0.0769851	1	0	-0.356	0.0111	1	1	-0.243764	0.127799	1	0	-0.127715	0.13879	1	0
22	protein_coding	ENSG00000093009	CDC45	8	0	0	-14	16	8	0.417	0.00918	1	1	0.523633	0.0350964	1	1	0.093	0.750485	1	0	-2.08802	1.18529e-14	1	1	-0.0871	0.143	1	0	0.229067	0.0219926	1	-1	0.498995	0.278591	1	0	-1.06	0.00022	1	1	-1.12292	1.75017e-07	1	1	-1.61491	6.50218e-24	1	1
2	protein_coding	ENSG00000144354	CDCA7	8	1	0	-17	13	8	---	---	0	0	0.286649	0.237431	1	0	-0.189	0.55757	1	0	-1.63158	9.18938e-11	1	1	---	---	0	0	-0.147431	0.066631	1	0	1.19337	0.00940286	1	1	---	---	0	0	-0.393378	0.0444298	1	1	-0.751753	1.34255e-07	1	1
1	protein_coding	ENSG00000134690	CDCA8	8	0	0	-17	16	8	0.0689	0.746	1	0	-0.162336	0.560181	1	0	-0.297	0.466599	1	0	-2.26213	9.22625e-32	1	1	-0.0686	0.44	1	0	-0.388238	0.00683491	1	1	-1.15259	0.0582482	1	0	-1.33	6.92e-05	1	1	-1.91882	3.63675e-26	1	1	-2.26662	2.48069e-54	1	1
5	protein_coding	ENSG00000153044	CENPH	8	0	0	-12	14	8	---	---	0	0	-1.13892	0.0052682	1	-1	-0.778	0.033989	1	1	-1.46062	2.00901e-13	1	1	-0.0315	0.649	1	0	-0.301061	0.00622595	1	1	-0.859403	0.0535419	1	0	---	---	0	0	-1.17075	2.76323e-07	1	1	-1.06356	5.85844e-16	1	1
21	protein_coding	ENSG00000159259	CHAF1B	8	0	0	-14	16	8	0.214	0.0467	1	1	0.347112	0.157947	1	0	0.455	0.144886	1	0	-0.508504	0.0338516	1	1	-0.261	0.0108	1	1	0.0230074	0.786673	1	0	0.0925316	0.862966	1	0	-0.59	0.000868	1	1	-0.733973	0.0027254	1	1	-1.02591	2.43769e-09	1	1
22	protein_coding	ENSG00000183765	CHEK2	8	0	0	-10	16	8	0.456	0.00414	1	1	0.0699937	0.735399	1	0	-0.289	0.440009	1	0	-1.48423	4.80906e-11	1	1	-0.161	0.0103	1	1	-0.0484177	0.649903	1	0	-0.258603	0.606576	1	0	-0.28	0.0387	1	1	-0.71451	0.0241199	1	1	-0.707034	0.000666417	1	1
10	protein_coding	ENSG00000065618	COL17A1	8	1	0	5	16	8	0.115	0.809	1	0	1.68922	0.0020699	1	1	0.12	0.837834	1	0	-0.363298	3.24101e-05	1	1	-0.321	0.000498	1	1	0.341179	0.00250335	1	-1	4.53449	1.36621e-28	1	1	-0.529	0.00136	1	1	-0.155343	0.261325	1	0	-0.0238376	0.759276	1	0
22	protein_coding	ENSG00000099942	CRKL	8	1	1	-1	16	8	-0.383	0.261	1	0	0.233067	0.280592	1	0	-0.515	0.043755	1	1	-0.599965	4.18766e-11	1	1	-0.00573	0.963	1	0	-0.126046	0.063935	1	0	0.597826	0.012486	1	1	-0.502	0.00391	1	1	-0.49496	0.0010933	1	1	-0.468607	7.68906e-08	1	1
11	protein_coding	ENSG00000165490	DDIAS	8	0	0	-13	14	8	---	---	0	0	0.435735	0.0401529	1	1	0.161	0.528037	1	0	-1.78945	8.07952e-10	1	1	-0.0616	0.404	1	0	0.114335	0.150343	1	0	0.998653	0.000360038	1	1	---	---	0	0	-1.79337	2.06913e-17	1	1	-2.28351	4.14584e-63	1	1
6	protein_coding	ENSG00000124795	DEK	8	0	0	-14	16	8	0.288	0.348	1	0	-0.363653	0.163286	1	0	-0.0557	0.863729	1	0	-1.0461	6.20084e-23	1	1	-0.471	0.00152	1	1	-0.419424	0.0021279	1	1	-0.378338	0.203631	1	0	-1.08	0.000234	1	1	-1.44906	1.56479e-20	1	1	-1.56286	3.96512e-120	1	1
12	protein_coding	ENSG00000087470	DNM1L	8	0	0	-2	16	8	-0.344	0.0074	1	-1	0.536945	0.0386299	1	1	0.275	0.222191	1	0	-0.252374	0.026695	1	1	-0.341	0.000111	1	1	-0.33543	0.00179448	1	1	-0.574858	0.0297012	1	-1	-0.514	0.00172	1	1	-0.50663	0.000224163	1	1	-0.50779	1.33104e-11	1	1
11	protein_coding	ENSG00000175550	DRAP1	8	1	1	2	15	8	0.376	0.0385	1	1	1.76119	0.0004309	1	1	-0.372	0.276287	1	0	-1.68734	1.46726e-64	1	1	---	---	0	0	0.100665	0.200385	1	0	0.655231	0.0138304	1	1	-0.145	0.266	1	0	-0.466828	0.00557123	1	1	-0.376754	8.76583e-06	1	1
5	protein_coding	ENSG00000120738	EGR1	8	0	0	8	16	8	1	0.00187	1	1	-1.50698	0.0043809	1	-1	-1.68	0.008215	1	1	-1.23806	5.82691e-16	1	1	0.184	0.84	1	0	0.162832	0.0511662	1	0	1.10776	1.18092e-06	1	1	-0.978	0.000313	1	1	-0.257872	0.0969495	1	0	-0.639173	1.5107e-20	1	1
15	protein_coding	ENSG00000103966	EHD4	8	0	1	0	16	8	0.426	0.0374	1	1	0.55574	0.0295329	1	1	0.237	0.41086	1	0	-1.08548	4.52116e-28	1	1	0.0643	0.379	1	0	-0.0303295	0.697459	1	0	0.400855	0.134779	1	0	-0.436	0.00599	1	1	-0.718573	1.50658e-06	1	1	-0.699634	1.34137e-15	1	1
X	protein_coding	ENSG00000173674	EIF1AX	8	0	0	-8	16	8	0.147	0.716	1	0	-0.509729	0.0806747	1	0	-0.828	0.021718	1	1	-2.162	2.66665e-67	1	1	0.0809	0.434	1	0	-0.345094	0.00204369	1	1	-0.0846845	0.831737	1	0	-0.391	0.00926	1	1	-0.895625	2.96492e-07	1	1	-0.656304	1.87912e-14	1	1
X	protein_coding	ENSG00000186871	ERCC6L	8	0	1	-18	16	8	0.698	0.00144	1	1	-0.0139427	0.950195	1	0	-0.171	0.486145	1	0	-2.90405	1.39426e-34	1	1	-0.132	0.333	1	0	0.113813	0.152025	1	0	-0.259808	0.738575	1	0	-0.386	0.0177	1	1	-1.68178	7.74457e-12	1	1	-2.27834	2.82214e-34	1	1
8	protein_coding	ENSG00000104413	ESRP1	8	0	1	-1	15	7	-0.356	0.0874	1	0	-0.29819	0.129032	1	0	-0.969	0.010962	1	1	-0.287551	0.003452	1	1	0.0775	0.194	1	0	-0.214321	0.00618345	1	1	5.61631	0.029666	1	1	-0.809	0.000195	1	1	-0.382409	0.00641549	1	1	-0.291517	0.000156009	1	1
11	protein_coding	ENSG00000134954	ETS1	8	0	0	-4	16	8	0.216	0.217	1	0	-1.75175	0.0012941	1	-1	-2.22	0.002888	1	1	-2.70528	5.8973e-120	1	1	-0.112	0.0294	1	1	-0.348998	0.00244193	1	1	0.244007	0.397529	1	0	-0.0959	0.738	1	0	-0.496289	0.00104513	1	1	-0.27856	0.00340137	1	1
8	protein_coding	ENSG00000164687	FABP5	8	1	0	-6	15	7	0.666	0.000961	1	1	0.496245	0.0272857	1	1	-0.91	0.011133	1	1	0.912997	1.06888e-08	1	-1	-0.425	0.00414	1	1	-0.625591	0.0799202	1	0	0.322872	0.800733	1	0	-0.458	0.00314	1	1	-0.328161	0.850865	1	0	0.670903	0.48388	1	0
9	protein_coding	ENSG00000221829	FANCG	8	0	0	-12	16	8	0.408	0.00619	1	1	0.0126376	0.955163	1	0	0.0772	0.827914	1	0	-1.09968	9.13376e-11	1	1	-0.0984	0.0604	1	0	-0.11209	0.152236	1	0	0.637832	0.0375949	1	1	-1.33	2.17e-05	1	1	-0.77616	0.00306456	1	1	-1.18274	4.5853e-10	1	1
15	protein_coding	ENSG00000140525	FANCI	8	1	1	-14	15	8	0.935	0.000362	1	1	0.43767	0.0492733	1	1	-0.503	0.148481	1	0	-1.41312	9.93754e-25	1	1	---	---	0	0	0.2559	0.00496548	1	-1	0.111907	0.844295	1	0	-1.55	7.94e-06	1	1	-1.61321	1.49827e-33	1	1	-1.76597	1.49356e-99	1	1
8	protein_coding	ENSG00000079459	FDFT1	8	0	0	-1	16	8	0.592	0.00115	1	1	0.971252	0.0027941	1	1	0.326	0.22005	1	0	-0.393529	2.54134e-05	1	1	-0.088	0.509	1	0	-0.425335	0.00070432	1	1	0.0796778	0.845475	1	0	-0.439	0.00334	1	1	-0.305978	0.0150418	1	1	-0.212722	0.00115233	1	1
1	protein_coding	ENSG00000160752	FDPS	8	0	0	-1	16	8	0.913	0.000304	1	1	-0.147676	0.535645	1	0	-1.01	0.01381	1	1	-1.25913	4.00782e-38	1	1	0.219	0.116	1	0	-0.50876	0.00205479	1	1	-0.148132	0.703757	1	0	-0.322	0.0261	1	1	-0.381211	0.0070198	1	1	-0.331675	3.32603e-07	1	1
17	protein_coding	ENSG00000132589	FLOT2	8	1	0	-1	16	8	0.0786	0.708	1	0	0.396328	0.201657	1	0	0.316	0.407741	1	0	-0.382904	0.00106234	1	1	0.0401	0.733	1	0	-0.802111	0.00017902	1	1	0.133974	0.71022	1	0	-1.23	2.87e-05	1	1	-0.194288	0.253952	1	0	-0.264303	0.00445831	1	1
11	protein_coding	ENSG00000175592	FOSL1	8	1	1	4	16	8	0.341	0.302	1	0	-0.567832	0.417449	1	0	-1.66	0.076005	1	0	-3.61034	4.69305e-210	1	1	-0.0056	0.977	1	0	0.311105	0.00315601	1	-1	1.01991	3.83222e-05	1	1	-0.78	0.000265	1	1	-1.07151	3.75529e-16	1	1	-1.04262	3.03989e-49	1	1
3	protein_coding	ENSG00000114541	FRMD4B	8	1	0	-1	15	8	0.739	0.0163	1	1	-0.167301	0.530523	1	0	-1.68	0.003972	1	1	-0.827421	2.49755e-12	1	1	---	---	0	0	-0.316287	0.00348792	1	1	1.31275	0.0484618	1	1	-0.707	0.00114	1	1	-0.444507	0.0249474	1	1	-0.485943	1.45468e-05	1	1
7	protein_coding	ENSG00000075618	FSCN1	8	1	1	2	15	8	0.69	0.00481	1	1	0.706722	0.0100918	1	1	-1.14	0.032115	1	1	-2.37175	2.18596e-169	1	1	---	---	0	0	0.0266991	0.722985	1	0	0.49838	0.0584369	1	0	-1.46	1.44e-05	1	1	-0.0197429	0.934862	1	0	-0.153483	0.050215	1	0
6	protein_coding	ENSG00000001084	GCLC	8	0	0	1	16	8	0.238	0.134	1	0	-0.164982	0.429239	1	0	-0.652	0.055816	1	0	-0.903087	1.13969e-13	1	1	-0.213	0.00487	1	1	-0.766752	0.00032293	1	1	0.739546	0.0339855	1	1	-0.628	0.000538	1	1	0.342387	0.120639	1	0	0.458162	0.000251051	1	-1
7	protein_coding	ENSG00000006625	GGCT	8	0	0	-5	16	8	-0.0948	0.441	1	0	1.17355	0.0032153	1	1	-0.574	0.095857	1	0	-0.996656	1.04047e-13	1	1	-0.376	1.56e-05	1	1	-0.513937	0.00456645	1	1	-0.0762445	0.884091	1	0	-0.268	0.0381	1	1	-0.499857	0.0647503	1	0	-0.237975	0.0521765	1	0
20	protein_coding	ENSG00000101003	GINS1	8	0	0	-13	16	8	1.4	6.84e-05	1	1	0.338764	0.343376	1	0	0.986	0.059931	1	0	-1.44702	2.3899e-18	1	1	-0.0998	0.414	1	0	-0.0215883	0.76384	1	0	0.144297	0.747138	1	0	-0.856	0.000186	1	1	-1.65452	6.15516e-27	1	1	-2.17906	7.64422e-91	1	1
16	protein_coding	ENSG00000181938	GINS3	8	1	0	-16	15	8	0.286	0.0149	1	1	-0.438794	0.112355	1	0	0.569	0.142301	1	0	-0.0564352	0.878255	1	0	---	---	0	0	-0.174879	0.0569218	1	0	0.509903	0.155862	1	0	-0.253	0.0438	1	1	-1.14385	1.4241e-05	1	1	-1.62271	3.01405e-14	1	1
5	protein_coding	ENSG00000196743	GM2A	8	1	1	11	16	8	0.865	0.000646	1	1	2.14043	0.0002675	1	1	-1.25	0.00369	1	1	-0.203017	0.03657	1	1	-0.076	0.266	1	0	0.116701	0.0765347	1	0	1.42575	1.66203e-12	1	1	-1.27	0.000313	1	1	-0.498582	0.00111711	1	1	-0.0581575	0.537927	1	0
2	protein_coding	ENSG00000123485	HJURP	8	0	0	-17	16	8	0.655	0.00523	1	1	-0.738134	0.105121	1	0	-1.17	0.047256	1	1	-2.43565	1.16805e-34	1	1	-0.117	0.275	1	0	0.0026924	0.970975	1	0	-0.849645	0.135365	1	0	-1.44	1.3e-05	1	1	-1.80875	4.29773e-29	1	1	-2.13462	1.26792e-50	1	1
12	protein_coding	ENSG00000149948	HMGA2	8	1	1	-2	15	7	0.783	0.017	1	1	1.86699	0.0006274	1	1	-0.972	0.011965	1	1	-3.09375	2.86565e-154	1	1	-0.935	0.000152	1	1	0.162431	0.0580738	1	0	-0.306592	0.484914	1	0	-1.27	1.94e-05	1	1	-0.574317	2.11447e-05	1	1	-0.564803	3.17414e-15	1	1
6	protein_coding	ENSG00000096384	HSP90AB1	8	0	0	-1	16	8	0.299	0.315	1	0	3.29971	8.86e-05	1	1	-0.788	0.350609	1	0	-0.516889	3.33872e-08	1	1	-0.602	0.0148	1	1	0.150617	0.0442062	1	-1	0.00232454	0.995925	1	0	-0.283	0.0289	1	1	-0.409515	0.00278376	1	1	-0.346357	1.82057e-10	1	1
4	protein_coding	ENSG00000164070	HSPA4L	8	1	1	14	16	8	0.347	0.0848	1	0	1.67461	0.000937	1	1	-0.512	0.269261	1	0	-0.734611	2.38273e-08	1	1	-0.101	0.171	1	0	-0.420363	0.00080095	1	1	0.510826	0.171322	1	0	-0.147	0.303	1	0	-0.606658	0.000241388	1	1	-0.117599	0.172722	1	0
2	protein_coding	ENSG00000144381	HSPD1	8	0	0	-5	16	8	-0.167	0.0997	1	0	4.00327	0.0002217	1	1	0.466	0.082425	1	0	-0.338048	0.00333008	1	1	-0.482	0.0204	1	1	-0.101184	0.291148	1	0	-0.186622	0.592667	1	0	-0.378	0.00935	1	1	-0.445499	0.00535565	1	1	-0.245814	5.35256e-05	1	1
20	protein_coding	ENSG00000101384	JAG1	8	1	1	11	16	8	0.263	0.0853	1	0	2.14498	0.0016288	1	1	0.688	0.038835	1	-1	0.12415	0.484861	1	0	-0.448	4.07e-06	1	1	-0.202393	0.0115032	1	1	0.938981	0.0293098	1	1	-1.77	1.48e-05	1	1	-0.262576	0.141671	1	0	-0.445482	3.67767e-09	1	1
13	protein_coding	ENSG00000178695	KCTD12	8	1	0	2	16	8	-0.044	0.823	1	0	-1.23529	0.0032247	1	-1	-0.559	0.147036	1	0	-2.35874	9.93261e-72	1	1	-0.0556	0.689	1	0	-0.78289	0.00027566	1	1	2.87922	6.00149e-47	1	1	-0.47	0.032	1	1	-0.73319	1.88177e-05	1	1	-0.530595	2.85659e-10	1	1
16	protein_coding	ENSG00000167977	KCTD5	8	0	0	2	16	8	0.321	0.164	1	0	0.843554	0.0093986	1	1	-0.591	0.03283	1	1	-0.774249	2.48416e-09	1	1	-0.113	0.0322	1	1	-0.250455	0.00944431	1	1	-0.132578	0.720641	1	0	0.182	0.135	1	0	-0.328728	0.109065	1	0	-0.269008	0.0471698	1	1
22	protein_coding	ENSG00000100364	KIAA0930	8	1	1	1	15	8	0.261	0.0613	1	0	0.550717	0.0189898	1	1	-0.337	0.251069	1	0	-1.74711	4.22378e-79	1	1	---	---	0	0	-0.504451	0.00090648	1	1	1.0293	0.000468366	1	1	-0.903	0.000264	1	1	0.0308536	0.91552	1	0	-0.180582	0.0606435	1	0
1	protein_coding	ENSG00000118193	KIF14	8	0	1	-18	16	8	0.635	0.00305	1	1	-0.7193	0.0265584	1	-1	-0.91	0.025597	1	1	-2.48955	2.21329e-42	1	1	0.00798	0.975	1	0	-0.006622	0.936415	1	0	-0.93004	0.510276	1	0	-2.21	7.81e-06	1	1	-2.30817	4.74868e-51	1	1	-2.49201	2.83402e-148	1	1
5	protein_coding	ENSG00000112984	KIF20A	8	0	0	-18	16	8	0.707	0.00897	1	1	-1.77113	0.002372	1	-1	-1.14	0.020224	1	1	-2.25151	3.2775e-46	1	1	0.118	0.142	1	0	-0.154626	0.0406238	1	1	-1.08259	0.562484	1	0	-1.82	7.94e-06	1	1	-2.15968	2.895e-49	1	1	-2.61157	5.0958e-124	1	1
1	protein_coding	ENSG00000183853	KIRREL1	8	0	1	-4	15	8	-0.0431	0.842	1	0	0.809749	0.0152921	1	1	-0.419	0.199734	1	0	-2.09918	7.7371e-81	1	1	---	---	0	0	0.355052	0.00095023	1	-1	0.563653	0.0327222	1	1	-0.738	0.000293	1	1	-0.381396	0.00761803	1	1	-0.420032	7.84919e-08	1	1
2	protein_coding	ENSG00000118263	KLF7	8	0	0	-3	16	8	1.41	0.000673	1	1	-3.18307	0.0002865	1	-1	-3.36	0.001311	1	1	-1.95384	5.05706e-68	1	1	-0.00648	0.932	1	0	0.0372775	0.632455	1	0	0.634419	0.0170886	1	1	-0.873	0.000222	1	1	-0.15953	0.381447	1	0	-0.085858	0.399188	1	0
19	protein_coding	ENSG00000105486	LIG1	8	1	1	1	16	8	0.719	0.00638	1	1	-0.555756	0.0820522	1	0	0.0891	0.739382	1	0	-0.923554	1.53334e-10	1	1	-0.0297	0.855	1	0	-0.0435574	0.538503	1	0	0.846061	0.000680842	1	1	-0.741	0.00399	1	1	-0.864434	1.51844e-07	1	1	-1.18976	2.02713e-35	1	1
1	protein_coding	ENSG00000171517	LPAR3	8	1	1	-1	11	4	-0.00668	0.962	1	0	1.29392	0.0025998	1	1	-2.29	0.002042	1	1	-1.75603	1.54816e-48	1	1	---	---	0	0	-0.0748306	0.477431	1	0	4.3726	1.7487e-11	1	1	-0.291	0.0916	1	0	---	---	0	0	---	---	0	0
3	protein_coding	ENSG00000093167	LRRFIP2	8	0	1	-2	16	8	-0.15	0.465	1	0	-0.734995	0.0381993	1	-1	-1.57	0.011683	1	1	-0.739687	2.72905e-11	1	1	-0.0385	0.712	1	0	-0.331322	0.00248658	1	1	-0.381796	0.204028	1	0	-0.275	0.0456	1	1	-0.443544	0.0123574	1	1	-0.624157	2.88462e-10	1	1
4	protein_coding	ENSG00000145220	LYAR	8	0	0	-11	13	8	---	---	0	0	1.40229	0.002403	1	1	0.519	0.13636	1	0	-1.09427	3.12896e-09	1	1	---	---	0	0	-0.122691	0.31819	1	0	0.0754811	0.889592	1	0	---	---	0	0	-0.799358	8.78841e-08	1	1	-0.70581	2.30965e-13	1	1
8	protein_coding	ENSG00000120992	LYPLA1	8	0	0	2	16	8	0.0438	0.898	1	0	1.51242	0.0010318	1	1	-1.04	0.114645	1	0	-0.851473	4.70028e-16	1	1	-0.248	0.00705	1	1	-0.977451	0.00023248	1	1	-0.221307	0.516727	1	0	-0.376	0.0124	1	1	-0.458132	0.00115185	1	1	-0.516913	2.21621e-12	1	1
18	protein_coding	ENSG00000172175	MALT1	8	0	1	-4	16	8	0.336	0.0093	1	1	-0.321212	0.112169	1	0	-1.62	0.002888	1	1	-0.651034	9.24767e-10	1	1	0.0356	0.778	1	0	-0.18976	0.0158297	1	1	0.0985551	0.847039	1	0	-0.317	0.0364	1	1	-0.38298	0.0411659	1	1	-0.30467	0.00533061	1	1
6	protein_coding	ENSG00000156711	MAPK13	8	0	0	7	15	7	0.324	0.0168	1	1	0.905774	0.0096595	1	1	-0.426	0.18245	1	0	-0.0551282	0.694771	1	0	0.12	0.00742	1	-1	-0.480976	0.00054536	1	1	0.195305	0.689503	1	0	-1.07	5.23e-05	1	1	-1.62518	3.90711e-05	1	1	-0.960858	2.05414e-09	1	1
5	protein_coding	ENSG00000069020	MAST4	8	0	1	11	15	8	1.07	0.000342	1	1	0.601777	0.0141062	1	1	-0.74	0.014955	1	1	-0.307935	0.00560422	1	1	---	---	0	0	-0.326593	0.00330667	1	1	1.69569	9.82652e-13	1	1	-0.123	0.326	1	0	0.272748	0.158831	1	0	0.196113	0.0484321	1	-1
1	protein_coding	ENSG00000143384	MCL1	8	0	0	7	16	8	0.681	0.000504	1	1	0.764744	0.0059227	1	1	-0.939	0.009828	1	1	-0.582171	1.80798e-08	1	1	0.0395	0.69	1	0	-0.215229	0.0263737	1	1	0.33558	0.194263	1	0	-0.346	0.0101	1	1	-0.380571	0.00305096	1	1	-0.333532	3.01972e-08	1	1
6	protein_coding	ENSG00000112118	MCM3	8	0	1	-17	16	8	0.774	0.0204	1	1	1.68867	0.0005403	1	1	1.83	0.00204	1	-1	-0.550951	1.94925e-05	1	1	-0.428	0.00545	1	1	-0.0303637	0.748807	1	0	0.250106	0.548512	1	0	-0.825	0.000304	1	1	-0.468389	0.000775792	1	1	-1.05116	1.82681e-29	1	1
10	protein_coding	ENSG00000148773	MKI67	8	0	0	-18	16	8	0.508	0.122	1	0	0.799361	0.0077902	1	1	-1.07	0.012141	1	1	-2.6359	3.88401e-76	1	1	-0.0311	0.583	1	0	0.244911	0.067804	1	0	0.0134548	0.988441	1	0	-2.02	3.37e-06	1	1	-1.66825	2.90977e-49	1	1	-2.10042	1.72128e-270	1	1
14	protein_coding	ENSG00000157227	MMP14	8	1	1	7	16	8	0.231	0.0625	1	0	0.636808	0.0246876	1	1	-0.549	0.046663	1	1	-1.18433	6.90807e-40	1	1	-0.00168	0.981	1	0	0.38156	0.00188592	1	-1	-0.286258	0.342857	1	0	-0.621	0.000874	1	1	-0.35035	0.0178937	1	1	-0.251993	0.000107973	1	1
10	protein_coding	ENSG00000173269	MMRN2	8	1	0	0	16	8	0.71	0.00743	1	1	-1.10488	0.0147784	1	-1	-1.83	0.01855	1	1	-0.81257	1.70679e-05	1	1	0.0346	0.756	1	0	-0.258989	0.0109902	1	1	2.91236	4.55505e-08	1	1	-0.385	0.0205	1	1	-2.57749	1.60322e-05	1	1	-2.11241	5.98537e-08	1	1
1	protein_coding	ENSG00000053372	MRTO4	8	0	0	-14	16	8	-0.567	0.0599	1	0	1.81146	0.0013046	1	1	0.901	0.035422	1	-1	-0.335968	0.0757986	1	0	-0.284	0.000378	1	1	-0.259842	0.0355881	1	1	-0.50643	0.143866	1	0	-0.208	0.0797	1	0	-0.33967	0.0465034	1	1	-0.466915	1.62277e-06	1	1
20	protein_coding	ENSG00000101057	MYBL2	8	0	0	-14	16	8	0.221	0.211	1	0	0.124682	0.674867	1	0	0.335	0.343128	1	0	-1.9586	2.12701e-46	1	1	-0.056	0.548	1	0	0.026345	0.671486	1	0	-0.356167	0.23387	1	0	-1.54	9.89e-06	1	1	-1.44428	4.82821e-30	1	1	-1.96079	1.17898e-129	1	1
4	protein_coding	ENSG00000109805	NCAPG	8	0	0	-16	16	8	0.261	0.0253	1	1	-1.75761	0.0003105	1	-1	-1.13	0.007203	1	1	-2.24267	2.76172e-50	1	1	-0.408	0.000176	1	1	0.25701	0.0186626	1	-1	-0.391069	0.419641	1	0	-2.03	4.82e-06	1	1	-1.89821	3.17543e-39	1	1	-2.15192	4.54939e-123	1	1
10	protein_coding	ENSG00000173848	NET1	8	0	0	-9	16	8	1.27	7.03e-05	1	1	-0.781502	0.0074464	1	-1	-0.869	0.020098	1	1	-1.05181	1.01652e-29	1	1	-0.0419	0.849	1	0	0.0252865	0.78299	1	0	-0.405974	0.197028	1	0	-0.706	0.00398	1	1	-0.944288	2.85071e-08	1	1	-0.71693	1.70962e-17	1	1
7	protein_coding	ENSG00000146909	NOM1	8	1	0	-1	13	8	---	---	0	0	0.602818	0.0197007	1	1	0.754	0.039297	1	-1	-0.42769	0.00965346	1	1	---	---	0	0	0.0310041	0.771805	1	0	0.976793	2.63777e-05	1	1	---	---	0	0	-0.570142	0.000201769	1	1	-0.409341	2.55397e-05	1	1
7	protein_coding	ENSG00000091129	NRCAM	8	1	1	1	15	7	1.43	0.000723	1	1	1.11142	0.0013898	1	1	-0.29	0.265596	1	0	-2.48368	4.27507e-07	1	1	0.00787	0.931	1	0	0.0762423	0.380396	1	0	2.32561	8.00041e-10	1	1	-0.399	0.00667	1	1	-2.12541	1.8737e-11	1	1	-2.55147	1.52021e-30	1	1
8	protein_coding	ENSG00000157168	NRG1	8	0	1	5	16	8	0.955	0.00155	1	1	-1.80015	0.0007528	1	-1	-2.55	0.003476	1	1	-4.51771	5.49906e-176	1	1	-0.405	0.00364	1	1	0.252904	0.00950161	1	-1	-0.579969	0.0187495	1	-1	-0.198	0.177	1	0	-2.36348	1.40653e-35	1	1	-1.95901	2.30186e-38	1	1
12	protein_coding	ENSG00000111331	OAS3	8	1	1	-3	16	8	3.06	0.000126	1	1	1.99485	0.002696	1	1	1.38	0.023678	1	-1	-0.630057	1.15863e-09	1	1	-0.254	0.0029	1	1	0.807185	0.00022542	1	-1	1.92822	0.000181698	1	1	-0.723	0.00073	1	1	-0.630166	0.000355088	1	1	-0.634852	6.23292e-09	1	1
8	protein_coding	ENSG00000168078	PBK	8	0	0	-16	16	8	0.585	0.0306	1	1	-0.261712	0.568955	1	0	-0.186	0.766725	1	0	-1.67779	2.30201e-17	1	1	-0.258	0.000362	1	1	0.0312995	0.639712	1	0	-0.733387	0.0625284	1	0	-1.41	1.48e-05	1	1	-2.00259	1.68457e-40	1	1	-2.0574	1.08343e-110	1	1
19	protein_coding	ENSG00000062822	POLD1	8	0	0	-14	15	8	0.487	0.00253	1	1	0.300165	0.149568	1	0	-0.165	0.599236	1	0	-0.94149	3.30702e-12	1	1	---	---	0	0	0.0825972	0.393656	1	0	-0.0457093	0.928885	1	0	-0.631	0.00089	1	1	-0.326276	0.202765	1	0	-0.964808	2.21469e-10	1	1
12	protein_coding	ENSG00000110841	PPFIBP1	8	1	1	6	16	8	0.103	0.535	1	0	-2.55976	0.00069	1	-1	-2.08	0.0099	1	1	-0.356242	0.000937803	1	1	0.014	0.867	1	0	-0.210914	0.00655184	1	1	0.295515	0.381694	1	0	-0.906	0.000159	1	1	-0.301492	0.101166	1	0	-0.0932665	0.422593	1	0
20	protein_coding	ENSG00000101000	PROCR	8	1	0	16	16	8	0.462	0.00236	1	1	0.0601888	0.807076	1	0	-1.1	0.009243	1	1	-2.6946	1.44954e-60	1	1	-0.312	2.68e-05	1	1	0.467715	0.00087931	1	-1	0.617277	0.0185179	1	1	-0.5	0.00236	1	1	-0.079432	0.715524	1	0	0.083586	0.452735	1	0
X	protein_coding	ENSG00000101911	PRPS2	8	0	0	-5	16	8	0.462	0.0971	1	0	-0.528389	0.0528944	1	0	-0.163	0.607264	1	0	-1.30621	9.15132e-24	1	1	-0.268	0.0284	1	1	-0.236291	0.00939583	1	1	0.409867	0.191694	1	0	-0.577	0.00245	1	1	-0.679618	0.000190464	1	1	-0.825255	1.01509e-16	1	1
9	protein_coding	ENSG00000165661	QSOX2	8	1	1	-1	14	8	---	---	0	0	0.890373	0.0035653	1	1	0.442	0.133892	1	0	-0.580697	0.00248855	1	1	-0.232	0.000298	1	1	0.413554	0.00097822	1	-1	0.412403	0.218908	1	0	---	---	0	0	-0.493813	0.0156211	1	1	-0.528749	3.40541e-05	1	1
17	protein_coding	ENSG00000108384	RAD51C	8	1	1	6	16	8	-0.524	0.005	1	-1	0.461025	0.0345469	1	1	0.827	0.056901	1	0	0.203168	0.512047	1	0	-0.226	0.000248	1	1	-0.316948	0.0030629	1	1	0.466662	0.157073	1	0	-0.855	0.000195	1	1	-0.635215	0.0226267	1	1	-0.528675	0.000311319	1	1
22	protein_coding	ENSG00000099901	RANBP1	8	0	0	-9	16	8	-0.084	0.452	1	0	1.95655	0.0003434	1	1	0.666	0.062507	1	0	-0.530069	7.23151e-06	1	1	-0.269	0.0596	1	0	-0.137648	0.0527869	1	0	-0.391116	0.176395	1	0	-0.782	0.00038	1	1	-0.747753	1.56802e-06	1	1	-0.698002	5.84046e-15	1	1
4	protein_coding	ENSG00000169435	RASSF6	8	0	1	4	13	8	---	---	0	0	-0.815756	0.0098041	1	-1	-0.614	0.039858	1	1	-0.708597	0.131448	1	0	---	---	0	0	-0.351729	0.00809636	1	1	9.84247	2.70972e-09	1	1	---	---	0	0	-1.11403	0.001383	1	1	-0.696473	0.00107161	1	1
12	protein_coding	ENSG00000111445	RFC5	8	0	0	-15	16	8	0.461	0.00388	1	1	1.26446	0.0009073	1	1	0.634	0.079313	1	0	-0.410643	0.0462043	1	1	-0.125	0.324	1	0	0.0233336	0.785428	1	0	0.144583	0.739453	1	0	-0.591	0.000869	1	1	-1.2853	2.76723e-11	1	1	-1.50566	1.43013e-23	1	1
15	protein_coding	ENSG00000181827	RFX7	8	1	0	5	15	8	-0.276	0.365	1	0	-1.7893	0.0013917	1	-1	-0.941	0.030806	1	1	-0.990595	2.55648e-11	1	1	---	---	0	0	-0.416589	0.00095687	1	1	0.50905	0.137154	1	0	-0.318	0.0247	1	1	-0.346547	0.049175	1	1	-0.316192	0.000706942	1	1
10	protein_coding	ENSG00000099194	SCD	8	0	0	-10	16	8	0.436	0.00818	1	1	1.05186	0.0041758	1	1	-2.27	0.003258	1	1	-1.28181	6.05899e-45	1	1	0.522	0.155	1	0	-0.436426	0.00061794	1	1	-0.368349	0.322925	1	0	-1.01	8.42e-05	1	1	-0.269368	0.0425244	1	1	-0.0408087	0.589609	1	0
10	protein_coding	ENSG00000107957	SH3PXD2A	8	0	1	-2	16	8	0.0837	0.629	1	0	-0.505939	0.024279	1	-1	-1.25	0.003846	1	1	-1.28759	6.3367e-49	1	1	0.0214	0.697	1	0	-0.101368	0.10486	1	0	-0.112281	0.848472	1	0	-0.307	0.0364	1	1	-0.476359	0.000635508	1	1	-0.548975	3.44902e-12	1	1
5	protein_coding	ENSG00000145604	SKP2	8	0	0	-15	16	8	0.546	0.0034	1	1	-1.48491	0.0005569	1	-1	-1.27	0.049389	1	1	-0.351945	0.00486581	1	1	-0.177	0.00356	1	1	-0.597393	0.00026467	1	1	-0.138477	0.742273	1	0	0.29	0.154	1	0	-0.590051	0.001383	1	1	-0.575847	8.94633e-07	1	1
19	protein_coding	ENSG00000105281	SLC1A5	8	1	1	-8	15	8	-0.329	0.11	1	0	0.672905	0.013752	1	1	-0.414	0.120581	1	0	-1.52892	5.35769e-27	1	1	---	---	0	0	0.278594	0.00654792	1	-1	-0.35591	0.281602	1	0	-1.68	1.62e-05	1	1	-0.289253	0.0300181	1	1	-0.269596	0.000772304	1	1
4	protein_coding	ENSG00000109667	SLC2A9	8	1	1	2	13	6	-0.685	0.00285	1	-1	0.737326	0.0089972	1	1	-1.26	0.009142	1	1	-2.9242	3.53945e-49	1	1	---	---	0	0	-0.0276256	0.732989	1	0	3.7931	3.16217e-36	1	1	-1.25	6.81e-05	1	1	-0.12546	0.732477	1	0	-0.211947	0.325325	1	0
11	protein_coding	ENSG00000134955	SLC37A2	8	1	0	0	13	8	---	---	0	0	1.4608	0.0005809	1	1	-0.61	0.094347	1	0	-1.51877	4.86367e-20	1	1	---	---	0	0	-0.367987	0.00646955	1	1	0.528588	0.452748	1	0	---	---	0	0	-0.253792	0.163621	1	0	-0.307641	0.00209454	1	1
5	protein_coding	ENSG00000113658	SMAD5	8	1	0	6	16	8	-0.284	0.0858	1	0	-1.09955	0.0014045	1	-1	-1.32	0.004576	1	1	-0.631867	1.363e-09	1	1	-0.0207	0.775	1	0	-0.342626	0.00165845	1	1	0.97571	3.89376e-06	1	1	-0.633	0.00154	1	1	-0.735016	6.50404e-07	1	1	-0.550947	2.94579e-14	1	1
12	protein_coding	ENSG00000123352	SPATS2	8	0	1	-8	16	8	0.697	0.0504	1	0	0.594296	0.0523714	1	0	-0.778	0.024563	1	1	-0.99421	4.92863e-11	1	1	0.0205	0.792	1	0	-0.299093	0.00615881	1	1	0.448587	0.1068	1	0	-0.278	0.0264	1	1	-0.260583	0.290675	1	0	-0.303787	0.0530162	1	0
2	protein_coding	ENSG00000152253	SPC25	8	0	0	-18	16	8	0.786	0.0244	1	1	-0.0604108	0.770189	1	0	0.177	0.565857	1	0	-1.45696	0.000998074	1	1	-0.257	0.0176	1	1	-0.0560564	0.571388	1	0	-0.5931	0.278487	1	0	-1.58	3.71e-05	1	1	-1.84313	1.90859e-14	1	1	-2.34591	1.10163e-33	1	1
17	protein_coding	ENSG00000176170	SPHK1	8	0	0	1	16	8	1.49	6.41e-05	1	1	1.79289	0.0004264	1	1	0.729	0.07227	1	0	-1.10565	1.1404e-11	1	1	0.00792	0.909	1	0	0.0613649	0.489851	1	0	-0.465354	0.300516	1	0	-0.573	0.00976	1	1	-0.699698	0.00522059	1	1	-0.736576	3.83205e-05	1	1
5	protein_coding	ENSG00000133710	SPINK5	8	0	0	2	16	8	1.5	6.41e-05	1	1	1.92406	0.0002677	1	1	-1.88	0.005478	1	1	-2.59923	3.93066e-176	1	1	0.0865	0.461	1	0	-0.805577	0.00037671	1	1	7.01931	0.000794635	1	1	-0.476	0.00407	1	1	-0.319976	0.614591	1	0	-0.451479	0.186624	1	0
11	protein_coding	ENSG00000149136	SSRP1	8	0	1	-13	16	8	-0.713	0.138	1	0	0.690415	0.026486	1	1	-0.722	0.3403	1	0	-0.961741	2.71949e-23	1	1	-0.168	0.0482	1	1	0.376616	0.00961326	1	-1	-0.0333681	0.936621	1	0	-0.704	0.00034	1	1	-0.364953	0.00753652	1	1	-0.317759	2.92767e-07	1	1
X	protein_coding	ENSG00000134602	STK26	8	0	0	-4	16	8	0.0643	0.85	1	0	-0.991349	0.0096861	1	-1	-0.331	0.287133	1	0	-0.789075	1.82862e-09	1	1	0.0291	0.803	1	0	-0.576957	0.00023248	1	1	4.52971	4.70948e-24	1	1	-0.647	0.00722	1	1	-0.693839	6.50525e-05	1	1	-0.750434	3.31466e-11	1	1
9	protein_coding	ENSG00000165283	STOML2	8	0	0	-2	16	8	-0.68	0.00686	1	-1	0.410452	0.0503371	1	0	0.0207	0.951906	1	0	-0.43812	0.000175301	1	1	-0.173	0.00408	1	1	-0.359792	0.00159719	1	1	-0.279039	0.409232	1	0	-0.349	0.0103	1	1	-0.138321	0.486829	1	0	-0.22895	0.0211425	1	1
X	protein_coding	ENSG00000101945	SUV39H1	8	0	0	-11	16	8	0.241	0.0886	1	0	0.506605	0.0340901	1	1	0.488	0.072508	1	0	-0.464715	0.0436154	1	1	-0.0775	0.06	1	0	-0.258525	0.005166	1	1	-0.202592	0.685041	1	0	-0.771	0.000203	1	1	-1.01479	6.68603e-05	1	1	-1.644	1.83883e-16	1	1
19	protein_coding	ENSG00000105329	TGFB1	8	1	1	1	16	8	1.15	0.000608	1	1	0.349012	0.0758429	1	0	-2.35	0.001595	1	1	-2.55126	6.532e-59	1	1	-0.248	0.00303	1	1	0.314098	0.00225258	1	-1	-0.313605	0.29159	1	0	-0.292	0.0344	1	1	0.289259	0.141674	1	0	0.0299979	0.861259	1	0
2	protein_coding	ENSG00000155755	TMEM237	8	1	0	-1	14	8	---	---	0	0	-0.502074	0.0420757	1	-1	0.224	0.467025	1	0	-0.719963	2.4666e-05	1	1	-0.0185	0.747	1	0	0.0380035	0.685011	1	0	0.989954	8.36697e-06	1	1	---	---	0	0	-0.55262	0.0140903	1	1	-0.502858	2.95992e-05	1	1
8	protein_coding	ENSG00000104689	TNFRSF10A	8	0	0	10	13	7	---	---	0	0	1.00791	0.0058926	1	1	-1.02	0.01225	1	1	-1.25432	5.02393e-13	1	1	-0.0254	0.625	1	0	0.182949	0.016862	1	-1	1.42835	0.00620042	1	1	---	---	0	0	-0.655119	7.11635e-05	1	1	-0.566425	4.79848e-10	1	1
20	protein_coding	ENSG00000025772	TOMM34	8	1	0	0	16	8	0.0777	0.574	1	0	0.17668	0.326823	1	0	0.634	0.024877	1	-1	-1.00653	1.45448e-15	1	1	-0.359	0.0047	1	1	-0.280795	0.00223839	1	1	-0.0699129	0.862277	1	0	-0.791	0.000172	1	1	0.15306	0.446651	1	0	0.0282279	0.860426	1	0
3	protein_coding	ENSG00000183763	TRAIP	8	0	0	-14	16	8	0.269	0.0247	1	1	-0.26356	0.214416	1	0	-0.0836	0.789919	1	0	-1.01721	0.00522657	1	1	-0.0837	0.222	1	0	0.0332055	0.600502	1	0	0.186967	0.727266	1	0	-0.641	0.000986	1	1	-1.03671	0.00244513	1	1	-1.8005	2.24392e-11	1	1
5	protein_coding	ENSG00000146054	TRIM7	8	1	1	2	14	8	---	---	0	0	0.503426	0.0404221	1	1	-1.48	0.006036	1	1	-2.07069	3.54613e-36	1	1	-0.258	8.82e-05	1	1	-0.264439	0.00980268	1	1	0.612242	0.562711	1	0	---	---	0	0	-0.31589	0.18231	1	0	-0.320851	0.0542948	1	0
5	protein_coding	ENSG00000071539	TRIP13	8	1	0	-18	16	8	0.529	0.00199	1	1	0.0112902	0.96536	1	0	-0.179	0.63708	1	0	-2.61693	9.21531e-45	1	1	-0.337	0.000535	1	1	-0.0331217	0.647935	1	0	-0.784166	0.0448415	1	-1	-1.19	2.21e-05	1	1	-1.52042	4.26122e-21	1	1	-1.89208	9.47084e-72	1	1
4	protein_coding	ENSG00000168785	TSPAN5	8	1	0	-3	16	8	0.167	0.283	1	0	0.55125	0.0282523	1	1	-1.86	0.004184	1	1	-1.12622	2.98635e-17	1	1	0.0498	0.319	1	0	0.150884	0.0873507	1	0	0.138524	0.686816	1	0	-0.387	0.028	1	1	-0.629991	0.0258114	1	1	-0.452656	0.0189513	1	1
17	protein_coding	ENSG00000167721	TSR1	8	0	1	-6	16	8	-0.64	0.0128	1	-1	1.85756	0.0047651	1	1	1.44	0.030261	1	-1	-0.072754	0.681756	1	0	-0.346	0.0213	1	1	-0.138254	0.0371371	1	1	-0.0624145	0.876511	1	0	0.211	0.19	1	0	-0.519021	0.000712025	1	1	-0.523358	5.64921e-11	1	1
12	protein_coding	ENSG00000167553	TUBA1C	8	0	0	-10	16	8	0.549	0.0105	1	1	1.26338	0.0012715	1	1	0.338	0.157678	1	0	-0.704081	5.64611e-09	1	1	-0.107	0.646	1	0	0.0230658	0.737741	1	0	-0.364328	0.240785	1	0	-0.488	0.00196	1	1	-0.856629	4.78046e-15	1	1	-0.999009	8.94579e-54	1	1
9	protein_coding	ENSG00000188229	TUBB4B	8	0	0	-4	16	8	0.719	0.00894	1	1	0.948636	0.0042504	1	1	0.405	0.150028	1	0	-1.26854	3.14915e-47	1	1	0.155	0.221	1	0	0.0591067	0.342832	1	0	-0.366217	0.272836	1	0	-0.551	0.00107	1	1	-0.738092	2.50095e-09	1	1	-0.975003	1.50172e-50	1	1
17	protein_coding	ENSG00000131462	TUBG1	8	0	0	-5	16	8	0.401	0.0266	1	1	1.42855	0.0015728	1	1	0.281	0.356028	1	0	-1.3393	1.2398e-23	1	1	-0.262	1.87e-05	1	1	0.0090997	0.89819	1	0	0.132824	0.841607	1	0	-0.303	0.0352	1	1	-0.364972	0.0630142	1	0	-0.650393	2.21396e-08	1	1
18	protein_coding	ENSG00000176890	TYMS	8	1	1	4	16	8	0.581	0.00137	1	1	1.47247	0.003935	1	1	-0.483	0.2308	1	0	-2.10981	2.60827e-22	1	1	-0.0996	0.619	1	0	-0.157109	0.0576997	1	0	-0.259731	0.452132	1	0	-1.24	4.15e-05	1	1	-1.26852	2.04492e-16	1	1	-1.42568	1.90644e-51	1	1
1	protein_coding	ENSG00000143179	UCK2	8	1	1	-9	16	8	-0.393	0.086	1	0	1.05989	0.0028518	1	1	0.559	0.038771	1	-1	-0.381152	0.0109479	1	1	-0.123	0.0227	1	1	-0.115914	0.0732142	1	0	-0.228537	0.484365	1	0	-0.612	0.000709	1	1	-0.345165	0.0174533	1	1	-0.280137	0.00207827	1	1
16	protein_coding	ENSG00000141076	UTP4	8	0	1	-5	14	8	---	---	0	0	1.89864	0.0003259	1	1	0.915	0.029514	1	-1	-0.53799	0.000746971	1	1	-0.25	0.0295	1	1	-0.201283	0.0116958	1	1	-0.143418	0.699439	1	0	---	---	0	0	-0.368769	0.0203565	1	1	-0.481188	1.54124e-07	1	1
11	protein_coding	ENSG00000137693	YAP1	8	1	0	5	16	8	0.441	0.00489	1	1	-1.28095	0.0011519	1	-1	-0.675	0.027073	1	1	-0.289503	0.00236989	1	1	0.0116	0.925	1	0	-0.266298	0.00575292	1	1	0.0942161	0.810137	1	0	-0.0648	0.623	1	0	-0.623881	2.31041e-05	1	1	-0.317305	2.54746e-06	1	1
18	protein_coding	ENSG00000176105	YES1	8	1	1	3	15	8	-0.0759	0.599	1	0	1.57712	0.0017114	1	1	-0.0518	0.845519	1	0	-0.346823	0.000789949	1	1	---	---	0	0	-0.393548	0.00313546	1	1	0.0650908	0.871393	1	0	-0.226	0.0911	1	0	-0.652557	0.00111476	1	1	-0.352355	5.61993e-06	1	1
2	protein_coding	ENSG00000152518	ZFP36L2	8	0	1	5	16	8	1.03	0.00017	1	1	1.89732	0.0018916	1	1	-1.3	0.003545	1	1	-1.95344	1.59788e-84	1	1	0.101	0.0588	1	0	-0.43851	0.00157909	1	1	0.261118	0.51688	1	0	-1.3	4.76e-05	1	1	0.146586	0.354394	1	0	0.144493	0.0594729	1	0
15	protein_coding	ENSG00000174442	ZWILCH	8	0	0	-13	16	8	0.824	0.000202	1	1	1.18236	0.004841	1	1	1.22	0.009198	1	-1	-0.189554	0.394422	1	0	-0.111	0.444	1	0	-0.192342	0.0486445	1	1	-0.474849	0.103244	1	0	-1.35	4.18e-05	1	1	-1.46826	2.17021e-11	1	1	-1.45553	2.2602e-41	1	1
10	protein_coding	ENSG00000169129	AFAP1L2	7	0	0	0	13	7	---	---	0	0	1.06635	0.0275533	1	1	0.901	0.122355	1	0	-0.476645	0.000186951	1	1	-0.0399	0.717	1	0	-0.110638	0.184271	1	0	3.22755	0.000164843	1	1	---	---	0	0	-0.0251283	0.954303	1	0	0.0706231	0.805067	1	0
11	protein_coding	ENSG00000124942	AHNAK	7	1	1	6	16	8	0.225	0.41	1	0	-0.348562	0.113908	1	0	-1.17	0.032199	1	1	-0.249514	0.0201806	1	1	0.176	0.0565	1	0	-0.322335	0.00125607	1	1	0.236993	0.603932	1	0	-0.432	0.0126	1	1	-0.108043	0.552792	1	0	0.00258186	0.979991	1	0
14	protein_coding	ENSG00000129474	AJUBA	7	1	1	3	14	8	---	---	0	0	-1.72649	0.000347	1	-1	-1.87	0.001868	1	1	-1.93471	4.0894e-75	1	1	-0.163	0.0703	1	0	-0.316008	0.00142665	1	1	0.744598	0.0141127	1	1	---	---	0	0	-0.310396	0.0390526	1	1	-0.271151	0.00386733	1	1
6	protein_coding	ENSG00000131016	AKAP12	7	0	1	-7	15	8	2.56	1.58e-05	1	1	0.659826	0.034715	1	1	0.172	0.829927	1	0	-1.44546	1.77901e-10	1	1	---	---	0	0	0.960897	0.00046579	1	-1	0.0896405	0.804785	1	0	-0.581	0.000997	1	1	-0.844375	1.62929e-05	1	1	-0.352029	0.0156049	1	1
6	protein_coding	ENSG00000135334	AKIRIN2	7	0	1	-1	14	8	---	---	0	0	1.45694	0.0008406	1	1	-0.881	0.02157	1	1	-1.09392	3.85328e-14	1	1	-0.102	0.359	1	0	-0.186306	0.0111121	1	1	0.160616	0.665988	1	0	---	---	0	0	-0.410732	0.0840695	1	0	-0.201739	0.243237	1	0
11	protein_coding	ENSG00000166025	AMOTL1	7	1	1	6	14	8	---	---	0	0	0.664977	0.0099505	1	1	-0.444	0.108503	1	0	0.109318	0.312307	1	0	0.00753	0.902	1	0	-0.263422	0.00538052	1	1	1.12405	5.92839e-08	1	1	---	---	0	0	-0.598395	5.81596e-06	1	1	-0.461266	1.22555e-12	1	1
19	protein_coding	ENSG00000160007	ARHGAP35	7	0	0	-5	16	8	-0.161	0.256	1	0	0.782333	0.0128225	1	1	-0.789	0.02614	1	1	-0.228855	0.0265292	1	1	0.0379	0.84	1	0	-0.249042	0.00368749	1	1	-0.116015	0.737233	1	0	-0.412	0.00647	1	1	-0.24245	0.183413	1	0	-0.412908	2.15931e-06	1	1
16	protein_coding	ENSG00000168488	ATXN2L	7	0	0	-2	16	8	-0.118	0.596	1	0	0.691927	0.0116514	1	1	-0.411	0.222019	1	0	-1.11073	2.59674e-25	1	1	-0.266	0.00393	1	1	-0.047215	0.592463	1	0	0.514405	0.0412268	1	1	-0.424	0.00415	1	1	0.185694	0.361057	1	0	0.137925	0.178816	1	0
18	protein_coding	ENSG00000118276	B4GALT6	7	0	0	3	16	8	0.522	0.181	1	0	0.0886844	0.630656	1	0	0.539	0.102567	1	0	-1.06078	0.00685134	1	1	-0.00705	0.927	1	0	0.15519	0.132833	1	0	2.1927	2.21362e-05	1	1	-0.319	0.017	1	1	-0.86999	0.00143219	1	1	-0.731523	9.75464e-07	1	1
10	protein_coding	ENSG00000151929	BAG3	7	1	1	5	16	8	0.477	0.0191	1	1	0.094441	0.655613	1	0	-0.284	0.280204	1	0	-1.25738	9.12455e-39	1	1	-0.151	0.0263	1	1	-0.262325	0.00623377	1	1	0.372571	0.297668	1	0	-0.189	0.162	1	0	0.0459017	0.854815	1	0	0.136449	0.216552	1	0
2	protein_coding	ENSG00000138376	BARD1	7	0	0	-15	16	8	0.711	0.00341	1	1	-1.8547	0.0003034	1	-1	-1.13	0.014045	1	1	-0.196965	0.28746	1	0	-0.229	0.535	1	0	-0.317329	0.0168768	1	1	-0.0319636	0.960302	1	0	-0.65	0.000782	1	1	-0.983269	2.84374e-05	1	1	-1.60087	3.48657e-17	1	1
15	protein_coding	ENSG00000197299	BLM	7	0	0	-14	16	8	0.673	0.00163	1	1	0.1017	0.805046	1	0	0.262	0.547581	1	0	-1.69777	5.80542e-12	1	1	-0.192	0.0394	1	1	0.303876	0.00354839	1	-1	0.609715	0.0968655	1	0	-0.555	0.0211	1	1	-1.51001	1.44856e-08	1	1	-1.94978	1.04584e-27	1	1
15	protein_coding	ENSG00000169594	BNC1	7	1	1	0	15	7	0.399	0.0637	1	0	-0.800409	0.0064959	1	-1	-0.435	0.185067	1	0	-1.42753	1.62861e-47	1	1	-0.0304	0.888	1	0	-0.195766	0.0101709	1	1	0.847317	0.0103856	1	1	-0.633	0.00146	1	1	-0.245645	0.0891025	1	0	-0.0301129	0.783157	1	0
13	protein_coding	ENSG00000139618	BRCA2	7	0	0	-12	15	8	0.679	0.00196	1	1	0.127347	0.478697	1	0	-0.214	0.389856	1	0	-1.66957	1.2794e-17	1	1	---	---	0	0	0.143313	0.0700996	1	0	0.480982	0.223862	1	0	-0.416	0.00697	1	1	-1.45012	6.19956e-18	1	1	-2.01798	2.59589e-67	1	1
21	protein_coding	ENSG00000154640	BTG3	7	1	0	-1	16	8	0.269	0.2	1	0	0.576798	0.11261	1	0	-0.595	0.12753	1	0	-0.785878	2.21535e-10	1	1	-0.411	0.0151	1	1	0.240404	0.0172482	1	-1	0.548129	0.027274	1	1	-0.122	0.321	1	0	-1.10826	2.1711e-08	1	1	-1.02669	1.22885e-22	1	1
2	protein_coding	ENSG00000169679	BUB1	7	0	0	-18	16	8	0.876	0.000456	1	1	-1.11538	0.0098941	1	-1	-1.61	0.005892	1	1	-2.29793	2.3748e-49	1	1	-0.012	0.954	1	0	-0.0079309	0.915848	1	0	-1.21479	0.40547	1	0	-2	5.46e-06	1	1	-2.05906	3.54806e-45	1	1	-2.35977	9.42265e-105	1	1
12	protein_coding	ENSG00000133641	C12orf29	7	0	0	-1	15	8	-0.131	0.765	1	0	1.22049	0.0013711	1	1	-1.1	0.005227	1	1	-0.947898	9.8258e-16	1	1	---	---	0	0	-0.0980904	0.233974	1	0	0.384878	0.358087	1	0	-0.12	0.32	1	0	-0.654334	0.00270645	1	1	-0.485298	0.000721977	1	1
15	protein_coding	ENSG00000074410	CA12	7	1	1	1	15	7	1.5	6.69e-05	1	1	1.83633	0.0003393	1	1	-3.31	0.001311	1	1	-1.30974	2.42649e-24	1	1	-0.052	0.493	1	0	0.104737	0.209798	1	0	-0.683383	0.2534	1	0	-1.69	8.25e-06	1	1	-0.217511	0.185005	1	0	-0.0577501	0.544729	1	0
7	protein_coding	ENSG00000105974	CAV1	7	1	1	2	16	8	0.369	0.0141	1	1	-0.944015	0.0027848	1	-1	-0.62	0.10072	1	0	-2.15634	1.98227e-142	1	1	-0.036	0.859	1	0	-0.0752504	0.278007	1	0	0.107542	0.804004	1	0	-0.61	0.000967	1	1	-0.305647	0.0244463	1	1	-0.141617	0.0164413	1	1
21	protein_coding	ENSG00000159228	CBR1	7	0	0	-4	14	7	0.0821	0.734	1	0	0.520568	0.0582366	1	0	-1.15	0.052202	1	0	-0.749553	4.45019e-09	1	1	---	---	0	0	-0.666278	0.00017322	1	1	-0.0533354	0.913821	1	0	0.00593	0.974	1	0	-0.344264	0.0411659	1	1	-0.278085	0.0105204	1	1
5	protein_coding	ENSG00000134057	CCNB1	7	0	0	-19	16	8	-0.00735	0.959	1	0	-2.19502	0.0005531	1	-1	-1.01	0.01802	1	1	-2.10912	1.61878e-79	1	1	-0.13	0.235	1	0	0.0922844	0.235567	1	0	-0.931923	0.131006	1	0	-1.87	9.25e-06	1	1	-2.09948	8.48003e-61	1	1	-2.44453	2.40915e-190	1	1
5	protein_coding	ENSG00000158402	CDC25C	7	0	0	-17	16	8	0.204	0.126	1	0	0.542401	0.0186945	1	1	-0.886	0.028528	1	1	-2.3586	2.48171e-12	1	1	-0.0909	0.188	1	0	-0.0964743	0.282292	1	0	-0.920328	0.231603	1	0	-1.52	1.61e-05	1	1	-1.79998	8.0481e-08	1	1	-1.9777	5.03747e-19	1	1
12	protein_coding	ENSG00000111665	CDCA3	7	0	0	-20	16	8	0.423	0.0269	1	1	-1.47417	0.0008263	1	-1	-0.691	0.025656	1	1	-2.12849	4.61074e-20	1	1	-0.0441	0.594	1	0	0.265734	0.0111315	1	-1	-0.680622	0.329546	1	0	-1.46	1.06e-05	1	1	-1.68558	3.38131e-13	1	1	-2.12209	1.53536e-29	1	1
12	protein_coding	ENSG00000123374	CDK2	7	0	1	-13	16	8	0.837	0.000548	1	1	0.624437	0.0631035	1	0	-0.548	0.192875	1	0	-0.974406	3.5273e-15	1	1	-0.104	0.498	1	0	0.106532	0.16767	1	0	-0.491072	0.0698321	1	0	-0.469	0.00405	1	1	-0.681497	0.000287648	1	1	-1.00155	2.37063e-18	1	1
12	protein_coding	ENSG00000135446	CDK4	7	0	1	-9	16	8	-0.572	0.124	1	0	0.294326	0.170315	1	0	0.484	0.085622	1	0	-0.417905	0.00501035	1	1	-0.0593	0.33	1	0	-0.385765	0.00118572	1	1	-0.654009	0.105368	1	0	-0.504	0.00253	1	1	-0.282283	0.0997509	1	0	-0.324818	0.0013959	1	1
4	protein_coding	ENSG00000138778	CENPE	7	0	0	-16	16	8	0.156	0.407	1	0	0.201643	0.531675	1	0	-0.553	0.14173	1	0	-1.82531	1.81325e-40	1	1	-0.0777	0.625	1	0	0.0474994	0.719343	1	0	-1.22904	0.0320857	1	-1	-1.54	6.92e-05	1	1	-2.1602	3.41208e-30	1	1	-2.16822	9.86075e-119	1	1
9	protein_coding	ENSG00000188312	CENPP	7	1	1	-6	13	8	---	---	0	0	0.29644	0.124793	1	0	0.118	0.648439	1	0	-1.28697	0.000803193	1	1	---	---	0	0	-0.266877	0.00602166	1	1	0.678062	0.0580907	1	0	---	---	0	0	-1.28292	0.00116167	1	1	-1.41917	2.25394e-07	1	1
10	protein_coding	ENSG00000138180	CEP55	7	0	1	-19	16	8	0.457	0.101	1	0	-0.151248	0.666826	1	0	-0.101	0.827526	1	0	-2.05773	1.78702e-38	1	1	-0.0265	0.896	1	0	-0.106245	0.152865	1	0	-0.947874	0.0818712	1	0	-2.17	1.3e-05	1	1	-1.77248	4.47342e-38	1	1	-2.15187	5.56941e-122	1	1
1	protein_coding	ENSG00000130695	CEP85	7	0	1	-7	16	8	0.29	0.029	1	1	1.37247	0.0014519	1	1	0.261	0.319154	1	0	-0.0712241	0.761791	1	0	0.00498	0.951	1	0	-0.0282647	0.676421	1	0	0.260433	0.623812	1	0	-0.42	0.00832	1	1	-0.645237	0.00250063	1	1	-0.548001	0.00052261	1	1
3	protein_coding	ENSG00000163528	CHCHD4	7	0	1	-3	14	8	---	---	0	0	-0.00123954	0.995717	1	0	-0.214	0.356702	1	0	-0.770783	0.00197931	1	1	-0.284	0.000989	1	1	-0.480809	0.00608431	1	1	0.0689105	0.905202	1	0	---	---	0	0	-0.553594	0.00845487	1	1	-0.461214	0.0016325	1	1
15	protein_coding	ENSG00000169684	CHRNA5	7	0	0	-9	16	8	0.455	0.0188	1	1	0.48524	0.0805043	1	0	0.166	0.540376	1	0	-1.25135	0.0646275	1	0	-0.0556	0.562	1	0	0.739528	0.00026467	1	-1	0.591895	0.306631	1	0	-0.594	0.00335	1	1	-0.678632	0.0256219	1	1	-0.688713	0.00210619	1	1
12	protein_coding	ENSG00000122966	CIT	7	0	0	-17	16	8	0.264	0.0864	1	0	0.127125	0.479268	1	0	-0.779	0.023225	1	1	-2.21482	1.00644e-65	1	1	0.0399	0.811	1	0	0.0745005	0.329453	1	0	-0.643068	0.325606	1	0	-1.45	1.22e-05	1	1	-1.85218	4.09466e-28	1	1	-2.05932	3.68028e-55	1	1
13	protein_coding	ENSG00000136108	CKAP2	7	1	1	-10	16	8	0.549	0.187	1	0	-1.50592	0.0029208	1	-1	-0.741	0.024359	1	1	-0.969695	8.32864e-12	1	1	-0.189	0.227	1	0	-0.292502	0.00335409	1	1	-0.721134	0.111072	1	0	-1.03	6.12e-05	1	1	-1.86802	3.50307e-40	1	1	-1.80503	8.57811e-114	1	1
2	protein_coding	ENSG00000169607	CKAP2L	7	0	0	-17	13	8	---	---	0	0	-0.750761	0.0117149	1	-1	-0.995	0.02068	1	1	-2.84278	4.73987e-53	1	1	---	---	0	0	0.0168843	0.787939	1	0	-0.243311	0.642155	1	0	---	---	0	0	-2.05761	1.15191e-42	1	1	-2.3794	2.49972e-98	1	1
11	protein_coding	ENSG00000175216	CKAP5	7	1	0	-12	15	8	0.0708	0.714	1	0	2.66359	0.0033716	1	1	-0.116	0.615988	1	0	-0.454498	9.48235e-06	1	1	---	---	0	0	0.0043719	0.952386	1	0	-0.0105486	0.987435	1	0	-0.315	0.0157	1	1	-0.863759	9.21513e-14	1	1	-0.783456	7.32473e-37	1	1
3	protein_coding	ENSG00000184220	CMSS1	7	0	0	-11	14	8	---	---	0	0	0.0580218	0.768358	1	0	0.484	0.067357	1	0	-1.42236	4.58777e-10	1	1	-0.361	0.00353	1	1	-0.454894	0.00075788	1	1	-0.5078	0.242763	1	0	---	---	0	0	-0.359492	0.106553	1	0	-0.436042	0.00216312	1	1
3	protein_coding	ENSG00000091317	CMTM6	7	0	1	0	16	8	0.583	0.00123	1	1	2.14647	0.001406	1	1	1.25	0.023969	1	-1	-0.0407082	0.813856	1	0	-0.0576	0.74	1	0	-0.0151708	0.865489	1	0	0.0379768	0.932937	1	0	-0.422	0.00709	1	1	-0.998655	4.80699e-08	1	1	-0.70594	1.46313e-15	1	1
3	protein_coding	ENSG00000169714	CNBP	7	0	0	-4	16	8	-0.337	0.0081	1	-1	0.905751	0.0083872	1	1	-0.368	0.351098	1	0	0.180975	0.0975343	1	0	-0.228	0.0146	1	1	-0.462832	0.00103836	1	1	-0.0266603	0.956663	1	0	0.0951	0.558	1	0	-0.494634	7.26629e-05	1	1	-0.38006	1.8029e-08	1	1
2	protein_coding	ENSG00000082438	COBLL1	7	1	0	10	16	8	-0.195	0.356	1	0	-1.19749	0.0020776	1	-1	-2.09	0.003396	1	1	-2.23521	2.80955e-118	1	1	-0.341	0.000158	1	1	-0.669085	0.00032435	1	1	-0.723682	0.0152275	1	-1	-0.585	0.00197	1	1	-0.40172	0.0382548	1	1	-0.320402	0.00715939	1	1
7	protein_coding	ENSG00000146592	CREB5	7	1	1	-4	16	8	-0.376	0.188	1	0	-0.272368	0.153453	1	0	1.4	0.017451	1	-1	-2.05647	4.56898e-07	1	1	-0.0308	0.652	1	0	-0.008274	0.933562	1	0	2.12768	5.32416e-16	1	1	-0.685	0.00347	1	1	-0.623921	0.00510674	1	1	-0.55866	2.54113e-05	1	1
19	protein_coding	ENSG00000167600	CYP2S1	7	1	0	2	12	6	---	---	0	0	0.787669	0.0267245	1	1	-0.368	0.377811	1	0	-3.736	2.51827e-31	1	1	-0.00832	0.919	1	0	-0.0697818	0.303956	1	0	6.33906	3.52539e-68	1	1	---	---	0	0	---	---	0	0	---	---	0	0
16	protein_coding	ENSG00000179958	DCTPP1	7	1	0	-7	15	8	0.137	0.341	1	0	0.685385	0.0091073	1	1	1.19	0.005634	1	-1	-0.386641	0.0445291	1	1	---	---	0	0	-0.335727	0.00149262	1	1	-0.610198	0.050441	1	0	-0.445	0.00453	1	1	-0.287288	0.210427	1	0	-0.50953	0.000111579	1	1
12	protein_coding	ENSG00000013573	DDX11	7	0	0	-11	16	8	0.211	0.107	1	0	0.761182	0.0072822	1	1	0.487	0.054624	1	0	-0.717741	0.00857905	1	1	-0.0768	0.539	1	0	0.393651	0.00235035	1	-1	0.652053	0.0766586	1	0	-0.851	0.000328	1	1	0.0332467	0.93702	1	0	-0.445208	0.0441431	1	1
12	protein_coding	ENSG00000065357	DGKA	7	1	1	20	15	8	0.291	0.43	1	0	4.2533	5.36e-05	1	1	0.247	0.397188	1	0	0.0357659	0.826976	1	0	---	---	0	0	-0.216709	0.0252242	1	1	0.585874	0.047803	1	1	-0.847	0.000203	1	1	0.544091	0.000351136	1	-1	0.466758	7.67306e-10	1	-1
X	protein_coding	ENSG00000130826	DKC1	7	0	0	-13	16	8	-1.03	0.0012	1	-1	3.01908	0.000132	1	1	1.23	0.004055	1	-1	-0.450418	0.0102414	1	1	-0.209	0.217	1	0	0.830088	0.00055567	1	-1	0.0192375	0.967653	1	0	-0.499	0.00175	1	1	-0.446326	0.00176086	1	1	-0.446375	9.30492e-09	1	1
14	protein_coding	ENSG00000126787	DLGAP5	7	0	0	-18	16	8	0.887	0.00636	1	1	-1.56926	0.003082	1	-1	-1.13	0.033989	1	1	-2.46845	4.04104e-65	1	1	-0.0617	0.526	1	0	0.0840673	0.225764	1	0	-1.60231	0.200573	1	0	-2.37	9.59e-06	1	1	-2.32032	1.94839e-46	1	1	-2.37254	5.53987e-105	1	1
6	protein_coding	ENSG00000171462	DLK2	7	0	0	3	16	8	0.106	0.359	1	0	-1.20263	0.0055894	1	-1	-1.27	0.012223	1	1	-2.49201	9.77669e-34	1	1	-0.184	0.0704	1	0	-0.343709	0.00464628	1	1	0.234419	0.703034	1	0	-0.913	0.000322	1	1	0.189766	0.785046	1	0	0.600413	0.169086	1	0
19	protein_coding	ENSG00000161249	DMKN	7	0	0	0	14	8	---	---	0	0	1.46491	0.0008406	1	1	-2.41	0.002316	1	1	-2.738	1.56801e-154	1	1	-0.156	0.0856	1	0	-0.267624	0.00350422	1	1	1.80103	1.12887e-06	1	1	---	---	0	0	-0.46768	0.00219157	1	1	-0.454598	7.66243e-08	1	1
21	protein_coding	ENSG00000159147	DONSON	7	0	0	-14	16	8	0.843	0.00244	1	1	-0.220723	0.232401	1	0	0.19	0.539068	1	0	-0.705391	0.00082426	1	1	-0.127	0.323	1	0	-0.0208654	0.774116	1	0	-0.324574	0.330025	1	0	-0.285	0.0318	1	1	-0.91538	0.000214257	1	1	-1.21768	1.00767e-12	1	1
18	protein_coding	ENSG00000134757	DSG3	7	0	1	1	15	7	0.0565	0.905	1	0	0.739198	0.007016	1	1	-1.56	0.00236	1	1	0.160941	0.0942563	1	0	-0.166	0.183	1	0	-0.310149	0.00261827	1	1	5.27257	1.45247e-15	1	1	-0.00693	0.967	1	0	0.202336	0.259824	1	0	0.277098	9.67921e-05	1	-1
2	protein_coding	ENSG00000168393	DTYMK	7	0	0	-15	15	8	-0.194	0.46	1	0	0.551609	0.0193112	1	1	0.295	0.357568	1	0	-0.63993	1.0288e-05	1	1	---	---	0	0	-0.0498324	0.478224	1	0	-1.01285	0.000216895	1	-1	-0.841	0.000205	1	1	-0.825896	0.00016869	1	1	-1.04947	1.0649e-13	1	1
12	protein_coding	ENSG00000165891	E2F7	7	1	1	7	13	8	---	---	0	0	0.503227	0.0349629	1	1	-0.342	0.343828	1	0	-3.173	9.95108e-47	1	1	---	---	0	0	0.0572951	0.440252	1	0	0.103885	0.882523	1	0	---	---	0	0	-1.16862	1.59267e-11	1	1	-1.05546	2.99629e-29	1	1
11	protein_coding	ENSG00000129173	E2F8	7	0	1	-16	16	8	0.769	0.00872	1	1	-2.57764	0.0007721	1	-1	-1.87	0.007776	1	1	-1.84808	1.87977e-06	1	1	-0.0347	0.694	1	0	0.1642	0.0668101	1	0	1.32467	0.000116687	1	1	-0.25	0.219	1	0	-1.12668	0.000217643	1	1	-1.93236	6.31892e-11	1	1
1	protein_coding	ENSG00000117395	EBNA1BP2	7	0	0	-3	16	8	-0.685	0.00551	1	-1	0.978523	0.0044493	1	1	0.859	0.03404	1	-1	-0.810165	5.23677e-11	1	1	-0.485	0.000193	1	1	-0.168205	0.042753	1	1	-0.71043	0.0178905	1	-1	-0.0595	0.74	1	0	-0.351796	0.0266315	1	1	-0.288098	0.00284096	1	1
6	protein_coding	ENSG00000124802	EEF1E1	7	0	0	-4	16	8	-0.343	0.0948	1	0	2.16784	0.0004548	1	1	1.46	0.005552	1	-1	-0.196992	0.637494	1	0	-0.409	0.00102	1	1	-0.241082	0.0611074	1	0	-0.495212	0.320014	1	0	-0.246	0.0489	1	1	-0.547771	0.0453498	1	1	-0.474029	0.0345451	1	1
17	protein_coding	ENSG00000154920	EME1	7	1	1	-11	14	8	---	---	0	0	0.563957	0.0229739	1	1	0.539	0.046575	1	-1	-1.3499	0.00129011	1	1	-0.102	0.0238	1	1	0.0989179	0.281414	1	0	-0.152593	0.776914	1	0	---	---	0	0	-0.901139	0.0388025	1	1	-1.77072	1.71216e-09	1	1
4	protein_coding	ENSG00000226887	ERVMER34-1	7	0	0	-1	15	7	-0.163	0.176	1	0	0.115609	0.570272	1	0	0.186	0.457246	1	0	-2.95111	1.56011e-10	1	1	0.0761	0.5	1	0	0.0561676	0.416781	1	0	3.70896	3.89589e-08	1	1	-0.535	0.0013	1	1	-0.380193	0.0742678	1	0	-0.357069	0.00639442	1	1
12	protein_coding	ENSG00000135476	ESPL1	7	0	0	-17	16	8	0.386	0.0599	1	0	-0.372556	0.0634105	1	0	-0.855	0.010371	1	1	-2.39551	1.85949e-56	1	1	-0.136	0.112	1	0	0.283577	0.0243465	1	-1	-0.476892	0.467103	1	0	-1.28	1.62e-05	1	1	-1.59533	4.05743e-16	1	1	-2.15831	6.90837e-40	1	1
12	protein_coding	ENSG00000139641	ESYT1	7	0	0	1	16	8	0.586	0.0393	1	1	0.912261	0.0063043	1	1	0.546	0.077657	1	0	-0.58683	4.55589e-09	1	1	-0.165	0.146	1	0	0.398207	0.00158153	1	-1	0.655944	0.00685275	1	1	-0.162	0.185	1	0	-0.326174	0.0254636	1	1	-0.359791	3.06281e-07	1	1
17	protein_coding	ENSG00000175832	ETV4	7	1	0	1	16	8	0.253	0.122	1	0	1.50769	0.0008808	1	1	-0.213	0.492718	1	0	-3.09795	2.36395e-101	1	1	-0.0048	0.969	1	0	0.168956	0.0660105	1	0	2.0589	5.49343e-17	1	1	-0.907	0.000108	1	1	-0.589526	0.0578516	1	0	-0.371932	0.0704984	1	0
2	protein_coding	ENSG00000184731	FAM110C	7	1	0	2	12	7	---	---	0	0	0.446634	0.039226	1	1	-0.636	0.030619	1	1	-0.320252	0.0105428	1	1	---	---	0	0	-0.233479	0.0364975	1	1	---	---	0	0	---	---	0	0	-0.830748	0.00172645	1	1	-0.801019	3.91422e-09	1	1
12	protein_coding	ENSG00000204856	FAM216A	7	0	0	1	16	8	-0.579	0.00897	1	-1	-2.03124	0.0003816	1	-1	-1.74	0.004026	1	1	-2.07254	3.15947e-07	1	1	-0.43	0.00562	1	1	-0.117768	0.255667	1	0	-0.289588	0.47692	1	0	0.0879	0.476	1	0	-0.699499	0.014455	1	1	-0.539398	0.00968443	1	1
20	protein_coding	ENSG00000101447	FAM83D	7	0	0	-16	14	8	---	---	0	0	-0.23866	0.612102	1	0	-1.2	0.056868	1	0	-3.03755	3.8008e-85	1	1	-0.167	0.272	1	0	0.0412828	0.490455	1	0	0.0120193	0.989208	1	0	---	---	0	0	-2.24299	3.49897e-50	1	1	-2.22744	1.28677e-91	1	1
16	protein_coding	ENSG00000187741	FANCA	7	0	0	-15	16	8	0.103	0.367	1	0	0.521605	0.0380923	1	1	-0.377	0.224479	1	0	-1.63519	1.76519e-14	1	1	-0.0787	0.284	1	0	0.513362	0.00119956	1	-1	-0.028696	0.953061	1	0	-0.851	0.000186	1	1	-1.00365	4.8816e-07	1	1	-1.61149	2.85751e-33	1	1
10	protein_coding	ENSG00000026103	FAS	7	1	0	16	15	7	0.1	0.529	1	0	0.948935	0.0030395	1	1	0.479	0.105804	1	0	-0.963433	2.23596e-05	1	1	-0.264	0.0218	1	1	0.500893	0.0005694	1	-1	-0.179634	0.633594	1	0	0.568	0.00177	1	-1	-0.388258	0.0482288	1	1	-0.155272	0.126516	1	0
6	protein_coding	ENSG00000112029	FBXO5	7	0	0	-19	16	8	0.388	0.291	1	0	0.427626	0.0450974	1	1	-0.355	0.389698	1	0	-1.60375	5.97692e-12	1	1	-0.248	0.0884	1	0	0.0265761	0.777811	1	0	-0.161769	0.718542	1	0	-1.07	0.00141	1	1	-1.29972	1.65712e-10	1	1	-1.48909	3.79458e-18	1	1
11	protein_coding	ENSG00000151702	FLI1	7	0	0	-2	14	6	1.33	0.000201	1	1	0.467355	0.0307475	1	1	-0.262	0.270108	1	0	-2.48868	0.340189	1	0	0.0549	0.485	1	0	0.0605899	0.501489	1	0	0.0327664	0.952119	1	0	-0.506	0.00292	1	1	-0.634802	0.00817482	1	1	-0.228257	0.230827	1	0
5	protein_coding	ENSG00000251493	FOXD1	7	0	0	-2	16	8	0.195	0.28	1	0	0.508365	0.0317819	1	1	-1.53	0.010833	1	1	-3.07582	9.98045e-123	1	1	-0.0251	0.797	1	0	-0.25115	0.00694969	1	1	0.13361	0.748868	1	0	-0.127	0.449	1	0	-0.713293	0.0244779	1	1	-0.691966	0.00123303	1	1
5	protein_coding	ENSG00000145907	G3BP1	7	0	1	-5	16	8	-0.133	0.351	1	0	1.09464	0.0018304	1	1	0.649	0.023594	1	-1	-0.106083	0.393616	1	0	-0.425	0.00872	1	1	-0.151682	0.0279343	1	1	0.00718202	0.986506	1	0	-0.531	0.00183	1	1	-0.665039	4.72748e-06	1	1	-0.519715	6.69739e-21	1	1
18	protein_coding	ENSG00000141429	GALNT1	7	0	0	1	16	8	0.536	0.00828	1	1	1.63827	0.0105964	1	1	-1.18	0.00401	1	1	-0.847106	8.13763e-18	1	1	0.0418	0.467	1	0	0.479705	0.00064417	1	-1	-0.237402	0.545729	1	0	-0.823	0.000347	1	1	-0.0360881	0.892996	1	0	0.092268	0.324448	1	0
21	protein_coding	ENSG00000159131	GART	7	0	1	-11	16	8	-0.313	0.0656	1	0	2.06149	0.0005716	1	1	0.538	0.042975	1	-1	-0.396277	0.00104358	1	1	-0.352	0.00122	1	1	-0.0116117	0.867586	1	0	0.010245	0.980509	1	0	-0.567	0.00123	1	1	-0.152019	0.368952	1	0	-0.198445	0.0140558	1	1
5	protein_coding	ENSG00000082516	GEMIN5	7	0	0	-8	14	8	---	---	0	0	0.575285	0.0694225	1	0	0.585	0.115776	1	0	-0.743286	2.19077e-05	1	1	0.0612	0.489	1	0	-0.166153	0.0499964	1	1	0.214125	0.595647	1	0	---	---	0	0	-0.40777	0.0109134	1	1	-0.419179	2.16978e-05	1	1
16	protein_coding	ENSG00000131153	GINS2	7	0	0	-14	16	8	0.95	0.000832	1	1	0.495951	0.0249115	1	1	0.747	0.025158	1	-1	-1.25145	7.29121e-08	1	1	-0.0914	0.157	1	0	-0.0530589	0.536905	1	0	-0.545871	0.144975	1	0	-1.31	1.85e-05	1	1	-1.03815	6.92107e-06	1	1	-1.51699	1.22041e-16	1	1
8	protein_coding	ENSG00000147536	GINS4	7	0	0	-5	16	8	0.112	0.601	1	0	0.29945	0.119785	1	0	-0.245	0.283572	1	0	-0.877263	0.00426557	1	1	-0.386	0.27	1	0	0.0690163	0.471604	1	0	0.174751	0.687765	1	0	-0.657	0.0102	1	1	-1.05407	2.3886e-07	1	1	-1.49019	4.55278e-31	1	1
1	protein_coding	ENSG00000065135	GNAI3	7	0	0	-2	16	8	0.299	0.198	1	0	0.818102	0.0064611	1	1	-1.12	0.00941	1	1	-0.279813	0.00568586	1	1	0.144	0.174	1	0	-0.235693	0.00647746	1	1	-0.490209	0.0708295	1	0	0.192	0.113	1	0	-0.511937	0.000102829	1	1	-0.466552	1.52037e-10	1	1
1	protein_coding	ENSG00000172380	GNG12	7	1	0	-2	15	8	-0.0841	0.408	1	0	3.56395	0.0001742	1	1	-1.41	0.042726	1	1	-0.285253	0.0041824	1	1	---	---	0	0	-0.47813	0.0032285	1	1	-0.460671	0.0760636	1	0	-0.577	0.00273	1	1	-0.527182	0.00386775	1	1	-0.321874	1.14622e-06	1	1
3	protein_coding	ENSG00000173905	GOLIM4	7	1	0	2	16	8	0.0343	0.892	1	0	1.57058	0.0017202	1	1	0.54	0.123143	1	0	-1.07255	3.67355e-16	1	1	0.137	0.276	1	0	0.158873	0.0264158	1	-1	0.343291	0.374259	1	0	-0.169	0.162	1	0	-0.531482	0.00177349	1	1	-0.359839	0.000216214	1	1
10	protein_coding	ENSG00000148834	GSTO1	7	0	1	2	16	8	0.363	0.107	1	0	1.81397	0.0003513	1	1	0.386	0.224716	1	0	-0.598987	2.34523e-07	1	1	-0.83	1.88e-07	1	1	-0.111553	0.328652	1	0	-0.312365	0.285008	1	0	-0.609	0.000743	1	1	-0.527636	0.000457342	1	1	-0.499598	4.58583e-08	1	1
17	protein_coding	ENSG00000132475	H3F3B	7	1	0	---	16	8	-0.196	0.0654	1	0	1.05786	0.0018771	1	1	-0.826	0.018227	1	1	0.155544	0.136632	1	0	0.149	0.244	1	0	-0.234098	0.0180546	1	1	-0.266909	0.49905	1	0	-0.136	0.261	1	0	-0.356972	0.0046703	1	1	-0.391153	2.13839e-10	1	1
5	protein_coding	ENSG00000113070	HBEGF	7	1	1	9	16	8	0.954	0.00544	1	1	0.726618	0.0305547	1	1	-1.93	0.003713	1	1	-2.81439	3.95664e-35	1	1	-0.0179	0.851	1	0	0.485454	0.00381577	1	-1	1.21381	0.000376479	1	1	-1.34	2.01e-05	1	1	-0.44143	0.0945245	1	0	-1.09717	4.40842e-21	1	1
12	protein_coding	ENSG00000182782	HCAR2	7	0	0	2	10	3	0.787	0.00658	1	1	0.441055	0.0940726	1	0	-3.45	0.003059	1	1	-1.26459	0.00460661	1	1	---	---	0	0	-0.0564507	0.39395	1	0	---	---	0	0	-0.313	0.0368	1	1	---	---	0	0	---	---	0	0
12	protein_coding	ENSG00000130787	HIP1R	7	0	1	5	15	8	0.23	0.0419	1	1	0.968067	0.0092639	1	1	0.324	0.405883	1	0	-0.823329	7.16524e-17	1	1	---	---	0	0	0.0584986	0.366156	1	0	1.01622	2.70012e-05	1	1	-0.485	0.00213	1	1	0.425346	0.142597	1	0	0.376748	0.0483604	1	-1
6	protein_coding	ENSG00000274290	HIST1H2BE	7	0	0	-5	15	7	0.117	0.368	1	0	0.512047	0.0225323	1	1	-1.04	0.006357	1	1	-1.64444	4.4998e-25	1	1	0.0103	0.903	1	0	-0.232661	0.0363836	1	1	2.0696	0.0013421	1	1	1.14	3.07e-05	1	-1	-1.47491	0.344296	1	0	-2.14415	0.0470304	1	1
6	protein_coding	ENSG00000275713	HIST1H2BH	7	0	0	-7	13	6	0.358	0.0233	1	1	0.505446	0.0438034	1	1	-0.85	0.013573	1	1	-1.2753	8.39876e-21	1	1	---	---	0	0	-0.246886	0.0112231	1	1	0.223718	0.868593	1	0	1.11	6.71e-05	1	-1	-0.561547	0.603672	1	0	-3.35081	7.29106e-07	1	1
6	protein_coding	ENSG00000158406	HIST1H4H	7	0	0	-3	16	8	-0.00959	0.965	1	0	1.61697	0.0009235	1	1	-0.842	0.011961	1	1	-1.33393	2.05972e-26	1	1	0.0142	0.841	1	0	-1.18712	0.0008303	1	1	1.67521	8.13714e-07	1	1	1.36	0.000105	1	-1	-1.69239	0.0288881	1	1	-2.27752	0.0210807	1	1
7	protein_coding	ENSG00000122566	HNRNPA2B1	7	0	1	-9	16	8	0.569	0.0244	1	1	0.630643	0.0305595	1	1	0.825	0.031531	1	-1	-0.592678	2.93683e-11	1	1	-0.269	0.0255	1	1	0.33995	0.00452072	1	-1	-0.613114	0.0718286	1	0	-0.377	0.0114	1	1	-0.571859	0.000642648	1	1	-0.342449	1.20677e-08	1	1
5	protein_coding	ENSG00000197451	HNRNPAB	7	1	0	-8	16	8	-0.219	0.236	1	0	2.38333	0.0001465	1	1	1.57	0.002599	1	-1	-0.0218748	0.935748	1	0	-0.321	0.0113	1	1	-0.0751536	0.2663	1	0	0.0801343	0.834376	1	0	-0.39	0.0062	1	1	-0.716249	1.55489e-07	1	1	-0.668854	7.10922e-28	1	1
4	protein_coding	ENSG00000152795	HNRNPDL	7	0	0	-10	15	8	0.568	0.00147	1	1	1.49049	0.0029399	1	1	-0.304	0.275055	1	0	-0.61629	9.08271e-09	1	1	---	---	0	0	-0.157852	0.0417824	1	1	-0.6339	0.00883358	1	-1	-0.447	0.00409	1	1	-0.0808512	0.65056	1	0	-0.11075	0.172454	1	0
19	protein_coding	ENSG00000105323	HNRNPUL1	7	0	1	-4	16	8	-0.333	0.4	1	0	0.545115	0.019575	1	1	0.349	0.316378	1	0	-0.0430712	0.760575	1	0	0.011	0.925	1	0	-0.511996	0.00061899	1	1	-0.29789	0.359052	1	0	-1.09	6.27e-05	1	1	-0.171179	0.233159	1	0	-0.186467	0.00838939	1	1
15	protein_coding	ENSG00000103942	HOMER2	7	0	0	-4	16	8	-0.264	0.0536	1	0	1.74886	0.0003296	1	1	-0.675	0.022206	1	1	-0.760703	8.51943e-06	1	1	-0.0791	0.0648	1	0	0.32418	0.0100581	1	-1	1.55135	0.0137564	1	1	-0.538	0.00252	1	1	-0.0369798	0.937593	1	0	-0.0197062	0.95016	1	0
X	protein_coding	ENSG00000165704	HPRT1	7	0	0	-6	16	8	0.198	0.234	1	0	0.566326	0.0414169	1	1	0.497	0.097374	1	0	-0.611785	0.0187247	1	1	-0.157	0.0732	1	0	-0.133705	0.0942899	1	0	-0.309258	0.347472	1	0	-0.43	0.00692	1	1	-0.610713	0.000538457	1	1	-0.527482	2.84844e-06	1	1
13	protein_coding	ENSG00000120694	HSPH1	7	0	0	-2	16	8	0.667	0.00309	1	1	3.16092	0.0003735	1	1	1.72	0.002266	1	-1	-1.18114	2.95527e-29	1	1	-0.405	0.0494	1	1	-0.0374728	0.61941	1	0	0.398836	0.131038	1	0	0.237	0.0525	1	0	-0.59549	9.89023e-06	1	1	-0.553525	4.46426e-19	1	1
11	protein_coding	ENSG00000198331	HYLS1	7	0	0	-14	14	8	---	---	0	0	-0.093754	0.762651	1	0	-0.132	0.732792	1	0	-0.867457	0.00234597	1	1	0.0115	0.797	1	0	-0.673425	0.00739397	1	1	-0.760185	0.0938709	1	0	---	---	0	0	-1.165	6.7212e-08	1	1	-0.910583	4.92203e-08	1	1
3	protein_coding	ENSG00000196083	IL1RAP	7	0	1	5	16	8	0.53	0.118	1	0	-1.67176	0.001257	1	-1	-1.8	0.004359	1	1	-2.85139	1.96141e-150	1	1	-0.407	0.000157	1	1	-0.0314728	0.697247	1	0	0.759434	0.00958832	1	1	-0.295	0.0244	1	1	-0.347428	0.0597418	1	0	-0.141592	0.236889	1	0
X	protein_coding	ENSG00000165359	INTS6L	7	0	0	3	13	8	---	---	0	0	-0.24348	0.27826	1	0	-0.778	0.013106	1	1	-0.94319	0.000268321	1	1	---	---	0	0	-0.372495	0.00188411	1	1	1.81096	0.000121003	1	1	---	---	0	0	0.346291	0.270642	1	0	0.190142	0.30785	1	0
14	protein_coding	ENSG00000184916	JAG2	7	1	0	2	16	8	-0.202	0.325	1	0	0.40055	0.187429	1	0	-0.112	0.752704	1	0	-1.5886	4.84639e-38	1	1	-0.0236	0.798	1	0	-0.0243002	0.772159	1	0	1.63212	1.37737e-06	1	1	-0.234	0.0957	1	0	0.264004	0.386132	1	0	0.0208804	0.939577	1	0
3	protein_coding	ENSG00000163376	KBTBD8	7	0	0	-1	12	7	---	---	0	0	0.554773	0.0221159	1	1	0.349	0.169175	1	0	-1.27112	5.36879e-05	1	1	---	---	0	0	0.1473	0.235367	1	0	1.29202	0.00246422	1	1	---	---	0	0	-1.11807	0.0165626	1	1	-1.36572	5.64415e-06	1	1
1	protein_coding	ENSG00000235750	KIAA0040	7	0	0	1	16	8	0.147	0.356	1	0	-0.341648	0.3752	1	0	0.363	0.248495	1	0	-2.60292	1.38111e-111	1	1	0.0697	0.657	1	0	-0.257444	0.0031599	1	1	1.42166	2.04307e-06	1	1	-0.137	0.256	1	0	-0.809644	3.79118e-06	1	1	-1.03013	1.99527e-33	1	1
10	protein_coding	ENSG00000138160	KIF11	7	0	0	-19	15	8	0.876	0.000177	1	1	-0.875686	0.0954021	1	0	0.0763	0.918786	1	0	-1.57661	4.27921e-29	1	1	---	---	0	0	0.079287	0.299354	1	0	-0.865493	0.0500687	1	0	-1.64	9.89e-06	1	1	-1.85458	5.17057e-33	1	1	-2.03354	1.44039e-115	1	1
3	protein_coding	ENSG00000163808	KIF15	7	0	0	-16	16	8	0.52	0.0212	1	1	-1.13921	0.0617955	1	0	-0.641	0.196253	1	0	-1.80786	1.09708e-11	1	1	0.0937	0.421	1	0	0.137827	0.164759	1	0	0.0543285	0.938846	1	0	-1.45	1.61e-05	1	1	-1.70956	3.73226e-19	1	1	-2.10883	1.13423e-41	1	1
17	protein_coding	ENSG00000186185	KIF18B	7	0	0	-12	15	8	0.419	0.0894	1	0	-0.510212	0.0250909	1	-1	-0.521	0.046893	1	1	-2.45952	3.23609e-31	1	1	---	---	0	0	0.162717	0.069645	1	0	-0.240166	0.768339	1	0	-1.1	9.62e-05	1	1	-1.29658	4.87749e-09	1	1	-1.99712	3.04137e-30	1	1
1	protein_coding	ENSG00000142945	KIF2C	7	0	0	-18	16	8	0.546	0.0197	1	1	-1.12681	0.0070376	1	-1	-1.06	0.014524	1	1	-2.58845	1.69183e-59	1	1	-0.0246	0.749	1	0	0.104309	0.227151	1	0	-0.680386	0.122053	1	0	-1.69	1.11e-05	1	1	-1.86605	4.46826e-34	1	1	-2.23206	7.7012e-98	1	1
X	protein_coding	ENSG00000090889	KIF4A	7	0	0	-20	15	8	0.421	0.0146	1	1	-1.04758	0.0118644	1	-1	-1.02	0.03762	1	1	-2.23468	4.60521e-27	1	1	---	---	0	0	-0.0231401	0.770398	1	0	-0.95096	0.0674664	1	0	-2.09	1.01e-05	1	1	-2.00516	7.74567e-30	1	1	-2.17373	1.31011e-65	1	1
X	protein_coding	ENSG00000003096	KLHL13	7	0	0	-6	12	7	---	---	0	0	-0.903838	0.0028504	1	-1	0.493	0.052765	1	0	-0.398256	0.239206	1	0	---	---	0	0	-0.672052	0.00038985	1	1	3.69033	0.0261425	1	1	---	---	0	0	-1.0987	0.0161255	1	1	-1.14698	0.00049501	1	1
12	protein_coding	ENSG00000111615	KRR1	7	1	1	-1	16	8	-0.263	0.0725	1	0	0.254452	0.171907	1	0	0.42	0.351812	1	0	0.249958	0.0931893	1	0	-0.345	0.00183	1	1	-0.272667	0.0337064	1	1	0.136318	0.733789	1	0	0.245	0.247	1	0	-0.743682	8.77827e-05	1	1	-0.405358	2.13066e-05	1	1
13	protein_coding	ENSG00000183722	LHFPL6	7	0	1	1	16	8	1.53	0.000515	1	1	-0.883095	0.0037369	1	-1	0.181	0.556715	1	0	-0.196475	0.414563	1	0	-0.269	0.0214	1	1	-0.100275	0.255882	1	0	1.00904	7.38576e-06	1	1	-0.0913	0.525	1	0	-1.59729	0.000136733	1	1	-1.16865	0.000360446	1	1
12	protein_coding	ENSG00000050405	LIMA1	7	1	1	7	16	8	1.42	0.000911	1	1	-0.961651	0.0037864	1	-1	-0.559	0.154183	1	0	-1.24545	1.83933e-43	1	1	0.168	0.308	1	0	0.008404	0.924189	1	0	-0.148807	0.656489	1	0	-0.628	0.00055	1	1	-0.891604	8.58425e-09	1	1	-0.631679	1.16727e-24	1	1
2	protein_coding	ENSG00000136536	MARCH7	7	1	0	-4	16	8	0.312	0.52	1	0	0.82168	0.0146898	1	1	-1.24	0.014626	1	1	-1.57976	8.16746e-49	1	1	-0.0782	0.286	1	0	0.177953	0.0557288	1	0	0.0205265	0.961581	1	0	0.091	0.553	1	0	-0.58121	0.00414562	1	1	-0.278792	0.00784985	1	1
10	protein_coding	ENSG00000065328	MCM10	7	0	0	-15	16	8	1.17	6.96e-05	1	1	1.15289	0.0013645	1	1	1.06	0.006088	1	-1	-1.63195	6.17722e-15	1	1	-0.403	0.0128	1	1	0.344945	0.00709197	1	-1	-0.0615464	0.908249	1	0	-1.3	6.83e-05	1	1	-1.04788	7.00741e-08	1	1	-2.08646	1.52483e-39	1	1
3	protein_coding	ENSG00000073111	MCM2	7	0	0	-17	16	8	0.578	0.0392	1	1	0.700506	0.011108	1	1	1.06	0.007565	1	-1	-0.877125	2.95275e-12	1	1	-0.162	0.0622	1	0	-0.0211346	0.784253	1	0	0.19238	0.600058	1	0	-0.946	0.000424	1	1	-0.545466	0.00159575	1	1	-1.20344	2.66185e-23	1	1
7	protein_coding	ENSG00000166508	MCM7	7	0	0	-18	16	8	0.392	0.132	1	0	2.69741	0.0005388	1	1	0.863	0.013344	1	-1	-1.62241	1.06991e-55	1	1	-0.22	0.21	1	0	0.107187	0.0984669	1	0	0.217086	0.555421	1	0	-1.42	2.15e-05	1	1	-0.685884	5.99434e-08	1	1	-1.04086	1.18994e-41	1	1
20	protein_coding	ENSG00000125885	MCM8	7	0	0	-12	14	8	---	---	0	0	0.832819	0.0066533	1	1	0.509	0.049518	1	-1	-0.192753	0.404099	1	0	-0.269	0.0187	1	1	0.120871	0.199007	1	0	0.343656	0.3035	1	0	---	---	0	0	-0.982396	2.4689e-09	1	1	-1.38344	1.30694e-32	1	1
6	protein_coding	ENSG00000065833	ME1	7	0	0	-5	16	8	-0.771	0.0104	1	-1	-0.190869	0.436582	1	0	-1.06	0.005259	1	1	-0.622591	4.20068e-08	1	1	-0.0603	0.26	1	0	-0.863087	0.00013486	1	1	0.342065	0.278687	1	0	-0.601	0.00397	1	1	-0.304423	0.148328	1	0	-0.23127	0.0343199	1	1
X	protein_coding	ENSG00000180182	MED14	7	0	0	0	15	8	0.414	0.021	1	1	-0.455831	0.13492	1	0	-0.676	0.030587	1	1	-0.610538	2.36745e-06	1	1	---	---	0	0	-0.143899	0.033425	1	1	0.514288	0.17549	1	0	-0.543	0.0115	1	1	-0.346431	0.0549398	1	0	-0.359183	0.00100672	1	1
12	protein_coding	ENSG00000152944	MED21	7	0	0	-1	16	8	0.637	0.00743	1	1	0.510702	0.0362446	1	1	-0.258	0.305541	1	0	-0.513665	0.000342147	1	1	-0.05	0.63	1	0	-0.455781	0.00062356	1	1	-0.198345	0.622799	1	0	-0.48	0.0024	1	1	-0.400302	0.0786774	1	0	-0.466657	0.00101962	1	1
9	protein_coding	ENSG00000165304	MELK	7	0	0	-18	16	8	0.602	0.0024	1	1	0.185868	0.326873	1	0	-0.096	0.718066	1	0	-1.43652	9.75672e-21	1	1	-0.305	0.000467	1	1	0.202109	0.0180359	1	-1	-0.608916	0.185054	1	0	-1.22	2.93e-05	1	1	-1.43935	1.84145e-23	1	1	-1.68596	3.59077e-69	1	1
4	protein_coding	ENSG00000164024	METAP1	7	0	0	-4	16	8	0.0854	0.466	1	0	-0.302115	0.252501	1	0	-0.108	0.683277	1	0	-0.28703	0.0154914	1	1	-0.22	0.00117	1	1	-0.54248	0.00047446	1	1	0.0353471	0.934494	1	0	-0.435	0.00415	1	1	-0.247098	0.194207	1	0	-0.184059	0.0577874	1	0
1	protein_coding	ENSG00000213190	MLLT11	7	1	0	-1	16	8	0.945	0.000174	1	1	1.01373	0.0074022	1	1	-0.244	0.551527	1	0	-1.0486	1.75676e-09	1	1	-0.0176	0.764	1	0	0.0709216	0.404296	1	0	-1.19464	7.28681e-05	1	-1	-0.627	0.000852	1	1	-0.790465	3.70899e-06	1	1	-0.95762	2.74035e-21	1	1
4	protein_coding	ENSG00000121211	MND1	7	1	0	-14	14	8	---	---	0	0	-1.45393	0.0133554	1	-1	-1.31	0.049564	1	1	-2.02549	4.33165e-05	1	1	-0.643	5.27e-07	1	1	-0.232701	0.0243433	1	1	-0.839513	0.172646	1	0	---	---	0	0	-1.31851	7.12958e-05	1	1	-0.943334	0.000444772	1	1
11	protein_coding	ENSG00000149573	MPZL2	7	1	0	5	16	8	1.8	7.83e-05	1	1	-0.695884	0.0090409	1	-1	-1.25	0.005888	1	1	-0.670069	8.39432e-11	1	1	-0.501	1.22e-06	1	1	0.213582	0.00825838	1	-1	5.39158	0.00022916	1	1	-0.572	0.00231	1	1	-0.673033	0.000181565	1	1	-0.652395	1.71209e-15	1	1
2	protein_coding	ENSG00000065911	MTHFD2	7	0	0	-4	16	8	-0.201	0.193	1	0	-1.37897	0.0033656	1	-1	-1.2	0.029835	1	1	-2.19216	1.10651e-44	1	1	-0.273	0.303	1	0	-0.0913503	0.371539	1	0	-0.213594	0.694932	1	0	-1.74	4.82e-05	1	1	-0.775202	1.23241e-07	1	1	-0.557532	3.85371e-11	1	1
1	protein_coding	ENSG00000132780	NASP	7	1	0	-10	16	8	0.451	0.063	1	0	1.39529	0.0031372	1	1	1.06	0.009152	1	-1	-0.537377	6.07431e-05	1	1	-0.563	3.59e-06	1	1	0.16638	0.0262419	1	-1	0.114159	0.76409	1	0	-0.783	0.00019	1	1	-0.535311	0.00135233	1	1	-0.897382	1.73888e-20	1	1
9	protein_coding	ENSG00000107130	NCS1	7	1	0	2	15	8	-0.0429	0.733	1	0	1.54575	0.0005654	1	1	-0.55	0.101205	1	0	-0.481378	1.91811e-06	1	1	---	---	0	0	0.113247	0.123508	1	0	0.332585	0.229664	1	0	-0.574	0.00142	1	1	-0.18876	0.323421	1	0	-0.253136	0.0169107	1	1
16	protein_coding	ENSG00000171208	NETO2	7	0	0	-5	16	8	-0.192	0.259	1	0	1.15828	0.0096498	1	1	1.78	0.007944	1	-1	-0.680509	2.13543e-07	1	1	-0.108	0.405	1	0	0.256684	0.0139031	1	-1	1.24058	8.03071e-07	1	1	-0.823	0.000345	1	1	-0.644064	1.0572e-05	1	1	-0.634233	9.24638e-13	1	1
10	protein_coding	ENSG00000196865	NHLRC2	7	0	0	-2	15	8	-0.499	0.0993	1	0	-0.254201	0.242486	1	0	0.675	0.057743	1	0	-0.432534	0.00112622	1	1	---	---	0	0	-0.193386	0.0333801	1	1	0.312294	0.357161	1	0	-0.626	0.00126	1	1	-0.550236	0.00191699	1	1	-0.551243	2.20137e-06	1	1
3	protein_coding	ENSG00000168268	NT5DC2	7	1	1	-2	15	8	-0.203	0.206	1	0	1.6337	0.0004194	1	1	0.504	0.097271	1	0	-0.731502	1.34703e-08	1	1	---	---	0	0	-0.208968	0.0370686	1	1	-0.596399	0.0334627	1	-1	-1.17	0.000128	1	1	-0.0682301	0.827588	1	0	-0.188882	0.116042	1	0
12	protein_coding	ENSG00000111581	NUP107	7	0	1	-8	16	8	0.36	0.0184	1	1	0.724617	0.0361685	1	1	1.18	0.015859	1	-1	-0.204669	0.207868	1	0	-0.254	0.166	1	0	-0.101095	0.147643	1	0	-0.107954	0.799333	1	0	-0.528	0.00164	1	1	-0.942155	4.97674e-07	1	1	-0.866199	2.66753e-18	1	1
7	protein_coding	ENSG00000155561	NUP205	7	0	0	-10	15	8	0.162	0.147	1	0	0.60963	0.0299977	1	1	0.629	0.063183	1	0	-0.251764	0.0194572	1	1	---	---	0	0	0.0263316	0.680203	1	0	0.0884347	0.866608	1	0	-0.27	0.0465	1	1	-0.720088	7.81285e-09	1	1	-0.824445	7.14238e-32	1	1
4	protein_coding	ENSG00000138750	NUP54	7	0	1	-5	15	8	-0.228	0.636	1	0	-0.187092	0.329795	1	0	0.00397	0.991054	1	0	-0.315704	0.0341172	1	1	---	---	0	0	-0.349752	0.0052597	1	1	-0.0836062	0.854321	1	0	-0.53	0.00379	1	1	-0.548736	0.00150319	1	1	-0.589485	5.96086e-08	1	1
15	protein_coding	ENSG00000137804	NUSAP1	7	0	0	-17	16	8	0.347	0.0372	1	1	-1.66677	0.0007282	1	-1	-0.688	0.035558	1	1	-1.7355	3.16541e-34	1	1	-0.153	0.165	1	0	0.0484021	0.451055	1	0	-0.694928	0.159708	1	0	-1.38	2.01e-05	1	1	-1.731	2.07584e-34	1	1	-1.77755	3.48542e-78	1	1
6	protein_coding	ENSG00000119900	OGFRL1	7	0	0	1	15	8	-0.375	0.0664	1	0	-0.448662	0.067598	1	0	-2.32	0.002559	1	1	-1.55382	1.88317e-29	1	1	---	---	0	0	0.0451009	0.625536	1	0	0.264084	0.377602	1	0	-0.512	0.0241	1	1	-0.55867	0.00431608	1	1	-0.429434	1.04642e-06	1	1
12	protein_coding	ENSG00000091039	OSBPL8	7	0	0	-1	16	8	0.0384	0.885	1	0	-1.05727	0.0047141	1	-1	-0.983	0.248409	1	0	-0.432566	2.30974e-05	1	1	-0.272	0.0442	1	1	-0.536941	0.00088539	1	1	-0.0988376	0.802046	1	0	-0.46	0.00294	1	1	-0.594199	0.00118179	1	1	-0.490813	6.1519e-08	1	1
4	protein_coding	ENSG00000128050	PAICS	7	0	0	-14	16	8	-0.324	0.0123	1	-1	-0.769489	0.026939	1	-1	0.214	0.557401	1	0	-0.909924	6.08457e-18	1	1	-0.262	0.149	1	0	-0.24061	0.0267284	1	1	-0.480881	0.0849443	1	0	-0.39	0.0067	1	1	-0.49937	3.94954e-05	1	1	-0.595618	1.52982e-21	1	1
22	protein_coding	ENSG00000100410	PHF5A	7	0	0	-4	14	8	---	---	0	0	0.8708	0.0260028	1	1	0.905	0.085033	1	0	0.040082	0.866576	1	0	-0.0731	0.408	1	0	-0.506515	0.00095318	1	1	-0.245896	0.601406	1	0	---	---	0	0	-0.48234	0.0146148	1	1	-0.567784	4.19453e-06	1	1
17	protein_coding	ENSG00000277161	PIGW	7	1	0	-7	14	8	---	---	0	0	-0.00577195	0.988425	1	0	1.58	0.009339	1	-1	0.33288	0.394622	1	0	-0.202	0.0006	1	1	-0.202729	0.0393437	1	1	0.112451	0.845497	1	0	---	---	0	0	-0.708775	0.00602022	1	1	-0.468005	0.0133418	1	1
2	protein_coding	ENSG00000144283	PKP4	7	1	1	-9	15	8	-0.375	0.00839	1	-1	2.06721	0.0015328	1	1	-0.848	0.332354	1	0	-0.666762	4.99263e-09	1	1	---	---	0	0	-0.572648	0.00033933	1	1	0.51384	0.120847	1	0	-0.872	0.000579	1	1	-0.41023	0.00915088	1	1	-0.460243	7.63635e-07	1	1
1	protein_coding	ENSG00000171680	PLEKHG5	7	1	1	0	16	8	0.0472	0.74	1	0	-0.384153	0.149889	1	0	-1.48	0.014543	1	1	-0.700635	5.11382e-11	1	1	0.00208	0.979	1	0	0.123839	0.115309	1	0	1.17407	4.44427e-07	1	1	-0.0875	0.488	1	0	0.147043	0.591795	1	0	-0.287826	0.00933665	1	1
X	protein_coding	ENSG00000101868	POLA1	7	0	0	-15	15	8	0.283	0.112	1	0	0.30305	0.204295	1	0	0.56	0.091375	1	0	-0.84119	1.72855e-05	1	1	---	---	0	0	-0.0843115	0.356011	1	0	0.484834	0.122153	1	0	-0.647	0.000697	1	1	-0.91383	2.07268e-05	1	1	-1.00264	2.28146e-12	1	1
11	protein_coding	ENSG00000077514	POLD3	7	0	0	-16	15	8	0.345	0.0449	1	1	0.529658	0.120289	1	0	0.868	0.053922	1	0	-0.0969148	0.695916	1	0	---	---	0	0	0.0156336	0.87564	1	0	0.56663	0.0695788	1	0	-0.448	0.00403	1	1	-0.679415	4.11965e-05	1	1	-1.0827	2.89819e-21	1	1
3	protein_coding	ENSG00000051341	POLQ	7	0	0	-13	15	8	0.481	0.0162	1	1	-0.318004	0.103893	1	0	0.00312	0.992565	1	0	-2.45291	6.67403e-33	1	1	---	---	0	0	0.57405	0.00072518	1	-1	0.00128322	0.998647	1	0	-0.313	0.0183	1	1	-1.54291	1.24369e-11	1	1	-1.82735	1.54037e-29	1	1
2	protein_coding	ENSG00000125630	POLR1B	7	0	0	-8	15	8	-0.0536	0.732	1	0	0.719459	0.0165599	1	1	1.29	0.005864	1	-1	-0.472725	0.0151825	1	1	---	---	0	0	-0.265551	0.00692872	1	1	0.211042	0.596769	1	0	0.115	0.336	1	0	-0.509931	0.00118635	1	1	-0.394325	0.000177623	1	1
6	protein_coding	ENSG00000137168	PPIL1	7	1	1	-4	14	8	---	---	0	0	1.29961	0.0009145	1	1	1.18	0.005135	1	-1	-0.507208	0.00449502	1	1	-0.149	0.0479	1	1	-0.453921	0.00053957	1	1	-0.231053	0.577216	1	0	---	---	0	0	-0.512266	0.00343904	1	1	-0.436953	4.81483e-05	1	1
18	protein_coding	ENSG00000154845	PPP4R1	7	1	1	0	16	8	0.803	0.000295	1	1	0.246488	0.283609	1	0	-0.386	0.166095	1	0	-0.639145	1.60956e-11	1	1	-0.0491	0.596	1	0	-0.147972	0.0271802	1	1	-0.444474	0.109742	1	0	-0.202	0.126	1	0	-0.692165	6.82824e-07	1	1	-0.452717	4.98118e-10	1	1
10	protein_coding	ENSG00000065675	PRKCQ	7	0	0	-1	14	6	0.442	0.0217	1	1	0.882885	0.004052	1	1	0.097	0.852841	1	0	-2.64192	1.47897e-14	1	1	-0.0539	0.668	1	0	-0.0886354	0.253477	1	0	---	---	0	0	-0.18	0.339	1	0	-1.5688	0.00282431	1	1	-1.46855	0.000153221	1	1
20	protein_coding	ENSG00000171867	PRNP	7	1	1	1	16	8	-0.2	0.537	1	0	4.3314	4.93e-05	1	1	-0.905	0.01802	1	1	-1.33242	3.28452e-45	1	1	-0.566	0.00471	1	1	0.183077	0.0137505	1	-1	-0.108665	0.757956	1	0	-0.833	0.000135	1	1	-0.695383	1.06997e-08	1	1	-0.549332	1.85996e-18	1	1
17	protein_coding	ENSG00000131470	PSMC3IP	7	1	0	-12	15	8	0.403	0.0333	1	1	-0.184352	0.326592	1	0	-0.426	0.210802	1	0	-0.663368	0.184795	1	0	---	---	0	0	0.299084	0.00743081	1	-1	-0.2785	0.460738	1	0	-0.378	0.0122	1	1	-0.701894	0.00766812	1	1	-1.60232	2.20591e-15	1	1
2	protein_coding	ENSG00000068878	PSME4	7	0	0	4	15	8	0.668	0.000877	1	1	0.888489	0.0084288	1	1	0.855	0.02089	1	-1	-0.796266	3.95116e-16	1	1	---	---	0	0	-0.0169443	0.801799	1	0	0.119665	0.775326	1	0	-0.383	0.00892	1	1	-0.395728	0.00603975	1	1	-0.313911	2.03394e-05	1	1
7	protein_coding	ENSG00000157778	PSMG3	7	0	0	-4	14	8	---	---	0	0	0.182066	0.334986	1	0	0.109	0.656808	1	0	0.148884	0.485482	1	0	-0.305	0.00692	1	1	-0.311442	0.00352944	1	1	-0.170731	0.715831	1	0	---	---	0	0	-0.389162	0.113791	1	0	-0.385871	0.0255119	1	1
1	protein_coding	ENSG00000134222	PSRC1	7	0	1	-18	16	8	0.277	0.0406	1	1	-1.20814	0.001653	1	-1	-0.651	0.037855	1	1	-1.34535	2.47224e-09	1	1	0.0169	0.889	1	0	-0.186974	0.0199893	1	1	-0.737719	0.232275	1	0	-1.82	7.25e-06	1	1	-1.78485	5.0727e-13	1	1	-1.97972	3.44495e-22	1	1
8	protein_coding	ENSG00000156471	PTDSS1	7	0	0	-4	15	8	-0.397	0.16	1	0	0.459841	0.0756323	1	0	0.568	0.075279	1	0	-0.0342377	0.838593	1	0	---	---	0	0	0.055367	0.500147	1	0	0.18334	0.580608	1	0	-0.452	0.00308	1	1	-0.319645	0.0199546	1	1	-0.320858	3.86834e-06	1	1
12	protein_coding	ENSG00000110958	PTGES3	7	0	0	-7	16	8	-0.0737	0.743	1	0	0.648972	0.026617	1	1	0.225	0.452947	1	0	-0.316845	0.00288101	1	1	-0.337	0.0025	1	1	-0.133264	0.207848	1	0	-0.507166	0.0517065	1	0	-0.184	0.138	1	0	-0.680647	6.75899e-08	1	1	-0.624827	1.25774e-22	1	1
10	protein_coding	ENSG00000099246	RAB18	7	1	0	1	14	8	---	---	0	0	1.84764	0.000323	1	1	-1.18	0.022012	1	1	-0.24555	0.0395338	1	1	0.118	0.0728	1	0	-0.361137	0.00868617	1	1	-0.366601	0.179329	1	0	---	---	0	0	-0.527059	0.00048782	1	1	-0.472564	2.44693e-08	1	1
1	protein_coding	ENSG00000117280	RAB29	7	0	0	4	15	8	0.189	0.321	1	0	0.501516	0.129506	1	0	-0.403	0.141111	1	0	0.0608525	0.815118	1	0	---	---	0	0	-0.120389	0.103476	1	0	0.774163	0.000882201	1	1	0.129	0.566	1	0	-0.500299	0.00774848	1	1	-0.338973	0.0017039	1	1
3	protein_coding	ENSG00000070950	RAD18	7	0	0	-14	14	8	---	---	0	0	-0.657478	0.0094286	1	-1	-0.541	0.040886	1	1	-0.663438	2.08296e-05	1	1	0.0252	0.872	1	0	-0.0684801	0.327906	1	0	-0.314509	0.388037	1	0	---	---	0	0	-0.926215	1.41106e-07	1	1	-1.33107	1.5317e-25	1	1
12	protein_coding	ENSG00000111247	RAD51AP1	7	0	0	-16	16	8	1.07	0.0133	1	1	-0.985779	0.008865	1	-1	0.254	0.531475	1	0	-1.45738	9.57782e-08	1	1	-0.149	0.0468	1	1	-0.0048247	0.949753	1	0	-0.164903	0.683604	1	0	-0.824	0.00201	1	1	-1.58582	5.89861e-09	1	1	-2.11341	1.77323e-35	1	1
1	protein_coding	ENSG00000085999	RAD54L	7	0	0	-15	16	8	0.276	0.116	1	0	0.386693	0.112375	1	0	-0.167	0.559281	1	0	-1.94047	1.34088e-07	1	1	0.00108	0.994	1	0	0.460863	0.00127487	1	-1	0.566821	0.128456	1	0	-0.421	0.00688	1	1	-1.22696	1.82033e-05	1	1	-1.98123	4.51063e-17	1	1
22	protein_coding	ENSG00000100401	RANGAP1	7	1	0	-5	16	8	0.127	0.548	1	0	1.93969	0.000402	1	1	0.367	0.165465	1	0	-0.53324	1.38176e-08	1	1	-0.114	0.46	1	0	0.243557	0.0102698	1	-1	0.0204382	0.959018	1	0	-0.496	0.00476	1	1	-0.719604	2.41242e-07	1	1	-0.818858	1.41646e-25	1	1
10	protein_coding	ENSG00000134453	RBM17	7	1	1	1	14	8	---	---	0	0	2.00679	0.0006259	1	1	-0.908	0.106281	1	0	-0.596711	3.03983e-06	1	1	-0.222	0.0129	1	1	0.0428199	0.47499	1	0	0.729854	0.00358749	1	1	---	---	0	0	-0.256092	0.208042	1	0	-0.238951	0.0451943	1	1
7	protein_coding	ENSG00000106344	RBM28	7	0	0	-3	16	8	-0.334	0.0693	1	0	0.677313	0.0086381	1	1	0.624	0.026532	1	-1	-0.307906	0.036741	1	1	-0.138	0.146	1	0	-0.12179	0.270514	1	0	0.125441	0.765345	1	0	-0.00316	0.987	1	0	-0.39535	0.00969278	1	1	-0.324253	0.000319782	1	1
9	protein_coding	ENSG00000120158	RCL1	7	1	0	3	16	8	-0.18	0.113	1	0	0.741115	0.0055946	1	1	-0.598	0.038906	1	1	-0.438661	0.0611408	1	0	-0.0344	0.617	1	0	-0.307924	0.00152281	1	1	0.559757	0.335775	1	0	-0.17	0.174	1	0	-0.158862	0.630811	1	0	-0.0595652	0.79943	1	0
12	protein_coding	ENSG00000004700	RECQL	7	0	0	-3	15	8	1.05	0.00224	1	1	-0.30588	0.11771	1	0	0.667	0.022057	1	-1	-0.407752	0.00442968	1	1	---	---	0	0	-0.157082	0.031498	1	1	-0.18843	0.583029	1	0	-0.303	0.0297	1	1	-0.714095	6.04216e-06	1	1	-0.723575	3.22753e-17	1	1
8	protein_coding	ENSG00000160957	RECQL4	7	0	0	-9	16	8	0.325	0.0441	1	1	0.308413	0.286519	1	0	0.297	0.368097	1	0	-0.607463	0.00367568	1	1	0.00553	0.943	1	0	0.0997409	0.194178	1	0	-0.0433343	0.929633	1	0	-0.505	0.00195	1	1	-0.650467	0.000677458	1	1	-1.62727	3.2799e-36	1	1
3	protein_coding	ENSG00000163918	RFC4	7	0	0	-15	15	8	0.0779	0.489	1	0	-0.0761599	0.787966	1	0	0.481	0.112872	1	0	-0.736285	0.00105811	1	1	---	---	0	0	0.0205506	0.73758	1	0	0.189911	0.66939	1	0	-1.33	2.06e-05	1	1	-0.877269	0.00011124	1	1	-1.04587	8.30084e-11	1	1
4	protein_coding	ENSG00000159788	RGS12	7	1	1	5	16	8	0.731	0.000457	1	1	1.26674	0.0015009	1	1	-0.903	0.020876	1	1	-0.329501	0.0543685	1	0	-0.0208	0.844	1	0	-0.172678	0.10326	1	0	0.335376	0.298157	1	0	-0.513	0.00345	1	1	0.149306	0.570506	1	0	0.172098	0.0880606	1	0
20	protein_coding	ENSG00000132669	RIN2	7	1	0	5	16	8	0.498	0.348	1	0	-0.404081	0.141559	1	0	-0.279	0.446641	1	0	-0.503431	0.000216951	1	1	-0.16	0.0443	1	1	-0.428693	0.00060919	1	1	-0.411907	0.135189	1	0	-0.893	0.000239	1	1	-0.438726	0.00658013	1	1	-0.18005	0.108854	1	0
11	protein_coding	ENSG00000167325	RRM1	7	0	0	-10	16	8	0.663	0.00216	1	1	-0.704978	0.0068286	1	-1	-0.286	0.212547	1	0	-0.845807	1.01408e-13	1	1	-0.303	0.00414	1	1	0.0310103	0.644212	1	0	0.136808	0.770815	1	0	-0.957	0.000102	1	1	-1.37527	1.73303e-29	1	1	-1.44279	1.32083e-126	1	1
2	protein_coding	ENSG00000171848	RRM2	7	1	0	-14	16	8	1.09	0.000343	1	1	0.371471	0.08414	1	0	0.866	0.017793	1	-1	-1.93607	3.60995e-29	1	1	-0.305	0.0339	1	1	0.0994168	0.151719	1	0	-0.0594418	0.884307	1	0	-1.53	1.86e-05	1	1	-1.67228	3.75279e-45	1	1	-2.32292	2.22207e-205	1	1
1	protein_coding	ENSG00000067533	RRP15	7	0	0	-7	16	8	-0.423	0.0331	1	-1	0.71417	0.0065133	1	1	1.4	0.00417	1	-1	-0.598199	0.000828109	1	1	-0.409	0.00131	1	1	-0.305702	0.0026582	1	1	-0.29779	0.441308	1	0	-0.355	0.011	1	1	-0.648515	2.31796e-05	1	1	-0.52495	4.80169e-09	1	1
3	protein_coding	ENSG00000114767	RRP9	7	0	0	-5	16	8	-0.879	0.00225	1	-1	0.622947	0.0206249	1	1	0.294	0.259616	1	0	-0.217065	0.492513	1	0	-0.0576	0.319	1	0	-0.182998	0.034762	1	1	-0.0122646	0.987988	1	0	-0.423	0.0043	1	1	-0.338828	0.206567	1	0	-0.342642	0.0480509	1	1
3	protein_coding	ENSG00000175792	RUVBL1	7	1	1	-4	16	8	-0.322	0.00993	1	-1	1.10158	0.0046241	1	1	1.42	0.006125	1	-1	-0.613533	2.01158e-07	1	1	-0.303	0.000503	1	1	-0.278771	0.006165	1	1	-0.147445	0.683551	1	0	-0.171	0.194	1	0	-0.229198	0.177765	1	0	-0.271957	0.00351438	1	1
13	protein_coding	ENSG00000151835	SACS	7	0	0	-7	16	8	0.537	0.102	1	0	1.09886	0.0023709	1	1	0.727	0.033703	1	-1	-1.26846	1.16675e-20	1	1	-0.163	0.15	1	0	0.417471	0.00111942	1	-1	0.620728	0.0205499	1	1	-0.0657	0.76	1	0	-0.684812	2.11132e-07	1	1	-0.686784	2.21351e-22	1	1
19	protein_coding	ENSG00000142230	SAE1	7	1	1	-7	16	8	-0.0961	0.363	1	0	2.64372	0.0001322	1	1	0.545	0.089573	1	0	-0.0383132	0.811203	1	0	0.148	0.00576	1	-1	-0.210279	0.0214569	1	1	-0.275406	0.335891	1	0	-0.484	0.00203	1	1	-0.578097	7.74086e-05	1	1	-0.683153	2.13061e-21	1	1
1	protein_coding	ENSG00000183431	SF3A3	7	0	0	-1	16	8	-0.266	0.238	1	0	-0.305563	0.160026	1	0	0.336	0.200541	1	0	0.0309371	0.874815	1	0	-0.485	0.00032	1	1	-0.0932734	0.132445	1	0	0.545303	0.0326939	1	1	-0.00105	0.995	1	0	-0.340192	0.0440881	1	1	-0.196773	0.0853138	1	0
1	protein_coding	ENSG00000189410	SH2D5	7	1	0	0	13	8	---	---	0	0	0.357504	0.0851511	1	0	-0.813	0.024232	1	1	-4.48379	3.18539e-166	1	1	---	---	0	0	0.0323991	0.740279	1	0	0.231205	0.926	1	0	---	---	0	0	-1.58274	0.00414562	1	1	-1.56119	3.74096e-05	1	1
22	protein_coding	ENSG00000100092	SH3BP1	7	1	1	-2	16	8	0.234	0.136	1	0	-0.181367	0.322125	1	0	-0.925	0.008163	1	1	-1.38007	4.11622e-20	1	1	-0.0482	0.614	1	0	-0.3039	0.0196801	1	1	1.28099	0.0134925	1	1	-0.219	0.141	1	0	0.159838	0.882499	1	0	0.0459831	0.966626	1	0
17	protein_coding	ENSG00000125454	SLC25A19	7	0	0	-9	14	8	---	---	0	0	0.518596	0.0354005	1	1	0.448	0.102522	1	0	0.10846	0.86773	1	0	-0.109	0.123	1	0	-0.170762	0.0416364	1	1	0.441012	0.315529	1	0	---	---	0	0	-0.822613	0.0104757	1	1	-0.999075	0.000292827	1	1
3	protein_coding	ENSG00000168917	SLC35G2	7	1	0	6	15	7	0.583	0.0199	1	1	0.413687	0.0799143	1	0	-0.49	0.091425	1	0	-3.65101	3.39503e-05	1	1	0.000333	0.997	1	0	0.124548	0.221412	1	0	1.01184	6.16694e-05	1	1	-0.336	0.028	1	1	-1.20709	0.000391309	1	1	-1.24158	8.63411e-10	1	1
3	protein_coding	ENSG00000113810	SMC4	7	0	0	-18	16	8	0.416	0.0935	1	0	-0.40546	0.145364	1	0	-1.02	0.021436	1	1	-1.2054	8.54091e-18	1	1	0.204	0.366	1	0	0.797599	0.00178939	1	-1	-0.278692	0.42415	1	0	-1.21	2.15e-05	1	1	-1.53997	1.14341e-32	1	1	-1.79004	2.88342e-144	1	1
2	protein_coding	ENSG00000163029	SMC6	7	0	0	-8	16	8	0.178	0.162	1	0	0.303722	0.110144	1	0	-0.281	0.227519	1	0	-0.516071	5.47829e-05	1	1	0.0806	0.243	1	0	-0.147491	0.0969314	1	0	0.0127707	0.980152	1	0	-0.68	0.00114	1	1	-0.760279	5.74558e-06	1	1	-0.716279	2.07888e-16	1	1
20	protein_coding	ENSG00000125835	SNRPB	7	0	0	-5	16	8	0.283	0.0734	1	0	1.77807	0.0004689	1	1	0.196	0.389544	1	0	-0.823888	2.94752e-19	1	1	-0.275	0.00339	1	1	0.0898244	0.147066	1	0	-0.776847	0.00063657	1	-1	-0.317	0.0298	1	1	-0.641614	1.84804e-06	1	1	-0.794931	1.57461e-30	1	1
2	protein_coding	ENSG00000198142	SOWAHC	7	0	0	2	15	8	0.0787	0.485	1	0	0.335629	0.0854314	1	0	-0.693	0.024103	1	1	-2.24498	1.32763e-95	1	1	---	---	0	0	-0.605031	0.00076165	1	1	0.234468	0.572859	1	0	-0.631	0.00076	1	1	-0.253576	0.255807	1	0	-0.167178	0.150438	1	0
X	protein_coding	ENSG00000186767	SPIN4	7	1	0	-9	12	7	---	---	0	0	-0.855016	0.0590579	1	0	-1.64	0.017277	1	1	-2.70984	5.06624e-37	1	1	---	---	0	0	-0.329161	0.0042895	1	1	0.475901	0.209772	1	0	---	---	0	0	-0.670487	0.0224908	1	1	-0.905568	2.26964e-05	1	1
5	protein_coding	ENSG00000187678	SPRY4	7	0	0	-1	15	7	0.617	0.00282	1	1	0.385671	0.0971174	1	0	-0.744	0.045422	1	1	-1.68962	6.44286e-35	1	1	0.0141	0.868	1	0	0.203318	0.0327707	1	-1	1.01504	1.99529e-06	1	1	-0.544	0.00123	1	1	-0.378191	0.0578516	1	0	-0.545451	3.25573e-06	1	1
3	protein_coding	ENSG00000196220	SRGAP3	7	1	1	10	15	7	0.136	0.518	1	0	-0.960025	0.0024118	1	-1	-0.726	0.023177	1	1	-1.57116	8.62102e-17	1	1	-0.0644	0.314	1	0	-0.212986	0.0191998	1	1	3.0194	4.75838e-08	1	1	-0.558	0.00109	1	1	-0.290155	0.422989	1	0	0.105714	0.638263	1	0
15	protein_coding	ENSG00000172345	STARD5	7	1	1	8	14	7	1.6	2.19e-05	1	1	-0.0929039	0.614273	1	0	-1.53	0.009912	1	1	-2.0688	6.98393e-30	1	1	---	---	0	0	-0.436376	0.00078788	1	1	4.1515	3.81497e-49	1	1	-0.0177	0.933	1	0	0.00655484	0.996992	1	0	-0.135247	0.860982	1	0
1	protein_coding	ENSG00000143498	TAF1A	7	0	0	-12	16	8	-0.207	0.323	1	0	0.506534	0.0433663	1	1	0.115	0.698075	1	0	-0.874048	0.0147843	1	1	-0.12	0.571	1	0	0.179909	0.119834	1	0	0.208404	0.770767	1	0	-1.11	6.99e-05	1	1	-0.884738	0.00105656	1	1	-0.762453	0.000167193	1	1
X	protein_coding	ENSG00000185222	TCEAL9	7	0	0	0	15	7	1.14	0.000614	1	1	-0.19879	0.277409	1	0	-0.882	0.012107	1	1	-1.00912	7.78316e-19	1	1	0.0542	0.701	1	0	-0.535055	0.00216907	1	1	-0.802549	0.0178441	1	-1	-0.0158	0.941	1	0	-0.797016	0.000376188	1	1	-0.315022	0.035849	1	1
14	protein_coding	ENSG00000042088	TDP1	7	0	0	-10	16	8	0.335	0.0157	1	1	-0.603529	0.0175782	1	-1	0.432	0.090981	1	0	0.0379129	0.860719	1	0	0.0404	0.542	1	0	-0.197941	0.00902738	1	1	0.226692	0.607848	1	0	-0.521	0.00147	1	1	-1.19644	5.27539e-09	1	1	-0.925298	1.3408e-09	1	1
5	protein_coding	ENSG00000112941	TENT4A	7	0	1	-6	16	8	0.0151	0.945	1	0	-0.221426	0.298502	1	0	0.0111	0.97584	1	0	-0.36673	0.00655856	1	1	0.132	0.134	1	0	-0.114258	0.112415	1	0	0.230614	0.491183	1	0	-0.43	0.0166	1	1	-0.506596	0.00650354	1	1	-0.43335	0.000465826	1	1
9	protein_coding	ENSG00000136891	TEX10	7	0	0	-2	16	8	0.0613	0.595	1	0	0.19123	0.333707	1	0	0.0991	0.732835	1	0	-0.771938	3.27901e-11	1	1	-0.617	3.87e-05	1	1	-0.126612	0.0774438	1	0	-0.107823	0.790599	1	0	-0.289	0.0318	1	1	-0.451757	0.019636	1	1	-0.186486	0.166151	1	0
13	protein_coding	ENSG00000151287	TEX30	7	0	0	-7	16	8	0.0181	0.96	1	0	-0.00877632	0.980517	1	0	-0.0398	0.895712	1	0	-0.894039	0.00484404	1	1	-0.268	0.00736	1	1	-0.125601	0.118245	1	0	-0.380929	0.263685	1	0	-0.416	0.0183	1	1	-1.11408	1.70048e-05	1	1	-1.02819	3.97114e-09	1	1
2	protein_coding	ENSG00000163235	TGFA	7	0	1	7	16	8	0.722	0.00113	1	1	1.25291	0.0022877	1	1	-0.53	0.080905	1	0	-1.42807	2.81911e-54	1	1	-0.216	0.387	1	0	0.399701	0.00200382	1	-1	3.85889	4.806e-56	1	1	-0.712	0.000856	1	1	-1.71942	6.71855e-37	1	1	-1.31454	3.45112e-77	1	1
19	protein_coding	ENSG00000172009	THOP1	7	0	0	-5	16	8	-0.193	0.117	1	0	0.534538	0.0228357	1	1	0.506	0.052953	1	0	-1.18883	2.57272e-24	1	1	-0.247	0.0413	1	1	-0.0225756	0.796848	1	0	-0.321303	0.299244	1	0	-0.45	0.00457	1	1	-0.202301	0.38729	1	0	-0.421089	2.10346e-05	1	1
3	protein_coding	ENSG00000163659	TIPARP	7	1	1	2	16	8	0.786	0.0345	1	1	-0.941483	0.0025321	1	-1	-1.52	0.002818	1	1	-1.41168	3.48974e-43	1	1	-0.436	0.00126	1	1	-0.269597	0.0032956	1	1	-0.0814937	0.850115	1	0	-0.0921	0.518	1	0	-0.418352	0.0249894	1	1	-0.24885	0.00624621	1	1
17	protein_coding	ENSG00000167900	TK1	7	0	0	-12	16	8	0.907	0.000278	1	1	-1.09815	0.0017419	1	-1	-0.595	0.03805	1	1	-2.26758	3.22559e-52	1	1	-0.103	0.348	1	0	-0.0788375	0.26089	1	0	-0.203289	0.529501	1	0	-1.4	1.66e-05	1	1	-1.31078	2.51127e-12	1	1	-1.81674	9.49054e-42	1	1
9	protein_coding	ENSG00000137076	TLN1	7	0	0	-1	16	8	-0.215	0.665	1	0	0.503953	0.0276698	1	1	-0.376	0.14794	1	0	-0.336513	0.000358045	1	1	0.023	0.702	1	0	-0.303408	0.00570826	1	1	0.0649035	0.881029	1	0	-0.456	0.00427	1	1	-0.0637072	0.786952	1	0	-0.19149	0.00537995	1	1
4	protein_coding	ENSG00000170006	TMEM154	7	1	0	3	13	7	---	---	0	0	-0.0229397	0.932356	1	0	-1.85	0.003395	1	1	-2.77448	1.45403e-206	1	1	0.112	0.103	1	0	-0.12131	0.0732988	1	0	2.09551	8.65758e-17	1	1	---	---	0	0	-0.211826	0.287161	1	0	-0.215199	0.0262667	1	1
1	protein_coding	ENSG00000215788	TNFRSF25	7	0	1	1	16	8	1.04	0.000204	1	1	-1.29618	0.0011042	1	-1	-1.83	0.002078	1	1	-1.51412	1.39888e-15	1	1	-0.0739	0.38	1	0	0.0864353	0.231746	1	0	1.88243	7.027e-07	1	1	-0.426	0.00443	1	1	0.35791	0.222222	1	0	-0.152396	0.411921	1	0
6	protein_coding	ENSG00000056972	TRAF3IP2	7	1	0	6	15	8	0.147	0.289	1	0	-0.768907	0.0057366	1	-1	-1.2	0.004055	1	1	-0.808131	2.24955e-12	1	1	---	---	0	0	-0.228668	0.0103923	1	1	0.758087	0.027219	1	1	-0.457	0.00321	1	1	0.135882	0.575129	1	0	0.193925	0.160648	1	0
12	protein_coding	ENSG00000135451	TROAP	7	0	0	-16	16	8	-0.0152	0.938	1	0	-0.921779	0.0073776	1	-1	-1.14	0.007527	1	1	-2.33422	4.92922e-20	1	1	0.123	0.09	1	0	0.142251	0.11703	1	0	-1.26066	0.0859091	1	0	-0.849	0.000781	1	1	-1.41968	1.20953e-11	1	1	-1.8175	1.38083e-31	1	1
6	protein_coding	ENSG00000112742	TTK	7	0	0	-20	16	8	0.873	0.0314	1	1	-2.41761	0.0001709	1	-1	-1.6	0.004421	1	1	-1.95646	4.43941e-24	1	1	-0.0562	0.311	1	0	-0.0325296	0.711343	1	0	-1.04151	0.0501321	1	0	-2.41	1.64e-05	1	1	-2.02126	4.12427e-30	1	1	-2.28208	3.45813e-56	1	1
15	protein_coding	ENSG00000137822	TUBGCP4	7	0	0	-5	16	8	-0.26	0.229	1	0	0.393744	0.10407	1	0	0.217	0.493213	1	0	-0.975103	8.12841e-09	1	1	-0.233	0.00671	1	1	-0.0606023	0.415032	1	0	0.501647	0.144824	1	0	-0.535	0.00134	1	1	-0.274386	0.169729	1	0	-0.43339	0.000115381	1	1
16	protein_coding	ENSG00000103404	USP31	7	1	1	4	13	8	---	---	0	0	-0.827305	0.0052151	1	-1	-1.05	0.007443	1	1	-2.07207	1.10284e-71	1	1	---	---	0	0	-0.432993	0.00185887	1	1	1.84418	1.86471e-13	1	1	---	---	0	0	-0.312158	0.184498	1	0	-0.41845	0.00681851	1	1
12	protein_coding	ENSG00000120800	UTP20	7	0	0	-11	16	8	-0.2	0.148	1	0	0.949089	0.0046837	1	1	0.765	0.022804	1	-1	-0.644742	1.9271e-06	1	1	-0.159	0.0575	1	0	-0.0510449	0.466264	1	0	0.190163	0.636724	1	0	-0.229	0.137	1	0	-0.428266	0.0140615	1	1	-0.414012	1.74984e-05	1	1
12	protein_coding	ENSG00000111424	VDR	7	1	1	2	16	8	0.236	0.102	1	0	1.39911	0.0005877	1	1	0.369	0.125839	1	0	-0.196029	0.230453	1	0	-0.233	0.00123	1	1	-0.360173	0.00283919	1	1	1.67892	1.02994e-14	1	1	-1.06	6.89e-05	1	1	0.274709	0.110009	1	0	0.317297	0.00103592	1	-1
14	protein_coding	ENSG00000100749	VRK1	7	0	0	-11	16	8	0.24	0.0858	1	0	0.13724	0.493501	1	0	0.469	0.086105	1	0	-0.682051	0.000171058	1	1	-0.203	0.0115	1	1	-0.0738268	0.26845	1	0	-0.373583	0.307866	1	0	-0.68	0.000383	1	1	-1.25499	4.11874e-09	1	1	-1.32206	1.87376e-26	1	1
12	protein_coding	ENSG00000158023	WDR66	7	1	1	10	14	8	---	---	0	0	-0.766749	0.0084664	1	-1	-1.56	0.002361	1	1	-2.19217	3.60212e-42	1	1	-0.0384	0.691	1	0	-0.0890215	0.218233	1	0	3.43534	1.78109e-16	1	1	---	---	0	0	-1.88755	1.48957e-14	1	1	-1.58682	1.8085e-25	1	1
5	protein_coding	ENSG00000152422	XRCC4	7	0	0	-5	15	8	0.432	0.0389	1	1	1.14843	0.0041464	1	1	-0.356	0.123799	1	0	0.0850341	0.815358	1	0	---	---	0	0	-0.434117	0.00865261	1	1	-1.14676	0.00307449	1	-1	-0.475	0.00239	1	1	-0.903578	0.00212223	1	1	-0.744299	0.000139142	1	1
7	protein_coding	ENSG00000170027	YWHAG	7	0	0	0	14	8	---	---	0	0	0.241046	0.190087	1	0	0.18	0.436435	1	0	-0.679001	1.40493e-14	1	1	0.167	0.349	1	0	-0.292963	0.00408947	1	1	-0.071159	0.85261	1	0	---	---	0	0	-0.61149	1.10874e-06	1	1	-0.490087	1.09761e-20	1	1
3	protein_coding	ENSG00000177494	ZBED2	7	0	0	2	15	7	0.98	0.000646	1	1	0.961329	0.0027889	1	1	-0.638	0.026919	1	1	-2.7645	7.81811e-129	1	1	0.0815	0.195	1	0	0.0108471	0.878228	1	0	4.46195	1.23645e-06	1	1	-2.52	1.39e-06	1	1	-0.137429	0.534342	1	0	-0.136227	0.257175	1	0
14	TEC	ENSG00000165804	ZNF219	7	1	0	12	16	8	0.261	0.0833	1	0	0.235344	0.285107	1	0	-0.409	0.09971	1	0	-0.761157	3.03248e-12	1	1	-0.0194	0.83	1	0	-0.458557	0.00054686	1	1	1.72919	1.1102e-08	1	1	-0.112	0.384	1	0	-0.112696	0.672294	1	0	0.083257	0.558212	1	0
12	protein_coding	ENSG00000161642	ZNF385A	7	1	1	12	14	8	---	---	0	0	-0.752298	0.101608	1	0	-1.31	0.045933	1	1	-1.42938	7.10524e-30	1	1	-0.0305	0.819	1	0	-0.392989	0.00072391	1	1	2.43806	2.81986e-12	1	1	---	---	0	0	0.623412	0.281645	1	0	0.511409	0.063002	1	0
15	protein_coding	ENSG00000198146	ZNF770	7	0	0	-2	14	8	---	---	0	0	-0.422443	0.116928	1	0	-1.23	0.025781	1	1	-0.291688	0.00404416	1	1	0.0407	0.525	1	0	-0.198848	0.0239615	1	1	0.109564	0.834813	1	0	---	---	0	0	-0.584863	0.00278262	1	1	-0.270175	0.0109258	1	1
6	protein_coding	ENSG00000066379	ZNRD1	7	0	1	-2	14	8	---	---	0	0	0.747121	0.0060118	1	1	-0.292	0.197773	1	0	-0.415853	0.0830984	1	0	-0.133	0.24	1	0	-0.546903	0.00051346	1	1	0.589101	0.168458	1	0	---	---	0	0	-0.568679	0.0853371	1	0	-0.0366289	0.902163	1	0
11	protein_coding	ENSG00000078124	ACER3	6	1	1	-2	14	8	---	---	0	0	0.9917	0.0101004	1	1	-0.194	0.406107	1	0	-1.1964	5.04024e-16	1	1	-0.438	1.3e-05	1	1	0.321416	0.0117985	1	-1	0.153943	0.679194	1	0	---	---	0	0	-0.679376	2.28187e-06	1	1	-0.662649	1.78996e-15	1	1
21	protein_coding	ENSG00000154734	ADAMTS1	6	0	0	-6	15	7	0.324	0.14	1	0	-3.4106	9.93e-05	1	-1	-4.98	0.001353	1	1	-7.87991	0	1	1	-0.465	0.00391	1	1	-0.101533	0.234259	1	0	-0.87887	0.00899081	1	-1	-0.0757	0.609	1	0	-1.62719	0.00784471	1	1	-1.95976	8.88647e-05	1	1
17	protein_coding	ENSG00000170425	ADORA2B	6	1	0	4	16	8	0.215	0.0688	1	0	-0.394002	0.310883	1	0	-0.422	0.361895	1	0	-1.72962	1.46171e-29	1	1	-0.0676	0.485	1	0	0.287903	0.00835923	1	-1	1.64767	0.00233991	1	1	-0.964	9.16e-05	1	1	-1.24761	5.39238e-07	1	1	-1.22787	5.65906e-13	1	1
5	protein_coding	ENSG00000157510	AFAP1L1	6	0	1	-4	13	8	---	---	0	0	-1.01386	0.0159366	1	-1	-2.12	0.003489	1	1	-1.0838	5.98311e-18	1	1	---	---	0	0	0.138148	0.152335	1	0	1.30147	2.26681e-06	1	1	---	---	0	0	-0.441681	0.0412696	1	1	-0.680427	2.29144e-06	1	1
1	protein_coding	ENSG00000153207	AHCTF1	6	0	0	-7	16	8	-0.198	0.274	1	0	0.0813158	0.768223	1	0	0.481	0.081499	1	0	-0.751347	4.57209e-09	1	1	-0.394	0.000402	1	1	0.14806	0.154392	1	0	0.151317	0.722847	1	0	0.0971	0.446	1	0	-0.447846	0.00414562	1	1	-0.345508	5.50568e-05	1	1
20	protein_coding	ENSG00000101444	AHCY	6	1	0	3	16	8	-0.456	0.0584	1	0	-0.0521131	0.848	1	0	-0.0618	0.870813	1	0	-0.558246	1.9547e-08	1	1	-0.377	0.00132	1	1	-0.353115	0.00374729	1	1	0.488042	0.0760231	1	0	-0.384	0.0133	1	1	0.0847609	0.616764	1	0	0.24277	9.00302e-05	1	-1
14	protein_coding	ENSG00000100591	AHSA1	6	0	0	-3	16	8	-0.0168	0.971	1	0	1.76786	0.0005981	1	1	1.51	0.00401	1	-1	-0.326961	0.00819606	1	1	-0.0839	0.358	1	0	-0.180917	0.0498113	1	1	-0.278743	0.429043	1	0	0.0452	0.741	1	0	0.00841436	0.975077	1	0	-0.277137	0.00418975	1	1
1	protein_coding	ENSG00000186063	AIDA	6	0	0	-2	14	8	---	---	0	0	-0.399956	0.0545882	1	0	-0.451	0.075021	1	0	-0.76059	9.26376e-05	1	1	0.0459	0.765	1	0	-0.4794	0.00568308	1	1	-0.294702	0.416828	1	0	---	---	0	0	-1.26433	6.96405e-08	1	1	-0.907787	2.23445e-11	1	1
17	protein_coding	ENSG00000179148	ALOXE3	6	0	0	5	16	8	1.13	6.84e-05	1	1	1.54188	0.0004689	1	1	-3.04	0.001595	1	1	-2.66734	8.9542e-58	1	1	0.0282	0.686	1	0	0.200107	0.0288	1	-1	2.15647	0.00591746	1	1	-0.692	0.000656	1	1	0.276674	0.711632	1	0	0.39252	0.336031	1	0
1	protein_coding	ENSG00000143401	ANP32E	6	0	0	-18	16	8	0.326	0.00868	1	1	-1.55094	0.0013096	1	-1	-0.673	0.037739	1	1	-0.117705	0.464551	1	0	-0.705	1.75e-05	1	1	0.12738	0.130164	1	0	-1.12547	0.000583613	1	-1	-0.766	0.000364	1	1	-1.38018	2.11154e-16	1	1	-1.24565	2.07012e-71	1	1
3	protein_coding	ENSG00000157500	APPL1	6	0	0	-7	16	8	-0.241	0.478	1	0	1.29818	0.0015635	1	1	-1.33	0.065901	1	0	-0.00762142	0.96951	1	0	0.287	0.0617	1	0	-0.169218	0.0286709	1	1	-0.356449	0.282283	1	0	-0.224	0.0772	1	0	-0.474059	0.00333326	1	1	-0.544544	1.3493e-08	1	1
14	protein_coding	ENSG00000165527	ARF6	6	0	0	-5	16	8	-0.224	0.225	1	0	1.41676	0.0029316	1	1	-0.568	0.048914	1	1	0.0960448	0.460051	1	0	0.0356	0.825	1	0	-0.249147	0.0047817	1	1	-0.447894	0.0751209	1	0	-0.412	0.00877	1	1	-0.545326	7.17008e-05	1	1	-0.367247	2.77631e-06	1	1
14	protein_coding	ENSG00000081181	ARG2	6	0	0	5	16	8	-0.426	0.00322	1	-1	1.63694	0.0043324	1	1	-2.5	0.004324	1	1	-3.51536	5.35469e-24	1	1	-0.157	0.331	1	0	-0.0193387	0.890519	1	0	0.768939	0.161469	1	0	-0.863	0.00856	1	1	-1.01555	0.000291683	1	1	-0.886645	4.05594e-07	1	1
15	protein_coding	ENSG00000198826	ARHGAP11A	6	0	0	-17	16	8	-0.0555	0.792	1	0	0.0720215	0.774123	1	0	-0.386	0.208283	1	0	-1.97012	1.19103e-49	1	1	-0.153	0.498	1	0	0.116094	0.253013	1	0	-0.96599	0.0444242	1	-1	-0.417	0.00506	1	1	-1.97173	1.81379e-39	1	1	-2.36046	1.27789e-139	1	1
17	protein_coding	ENSG00000141522	ARHGDIA	6	0	0	-3	16	8	-0.293	0.184	1	0	1.238	0.0010558	1	1	0.38	0.140938	1	0	-0.225411	0.0296928	1	1	-0.112	0.551	1	0	-0.300834	0.00431999	1	1	-0.186919	0.539654	1	0	-0.807	0.000178	1	1	0.0884441	0.640445	1	0	-0.0305773	0.780811	1	0
2	protein_coding	ENSG00000162980	ARL5A	6	0	0	-1	15	8	0.227	0.26	1	0	1.49121	0.00075	1	1	-1.64	0.002788	1	1	-0.837974	5.63078e-11	1	1	---	---	0	0	-0.151573	0.201681	1	0	-0.071981	0.883259	1	0	-0.0255	0.893	1	0	-0.744697	0.000705301	1	1	-0.639728	2.74307e-07	1	1
16	protein_coding	ENSG00000170540	ARL6IP1	6	0	0	-11	16	8	0.108	0.396	1	0	-0.700373	0.0338933	1	-1	-0.419	0.206626	1	0	-0.680351	3.23093e-11	1	1	-0.348	0.00128	1	1	0.101352	0.121007	1	0	-0.638603	0.196337	1	0	-0.795	0.000576	1	1	-1.2021	2.15479e-20	1	1	-1.14531	9.85753e-59	1	1
12	protein_coding	ENSG00000029153	ARNTL2	6	0	0	-9	15	8	0.564	0.00538	1	1	-0.264069	0.306928	1	0	-1.26	0.005892	1	1	-1.34471	1.54883e-36	1	1	---	---	0	0	0.0948598	0.194751	1	0	0.278748	0.55568	1	0	-0.34	0.0309	1	1	-1.30598	1.10944e-13	1	1	-1.31439	1.95265e-27	1	1
2	protein_coding	ENSG00000163466	ARPC2	6	1	1	2	16	8	0.151	0.168	1	0	1.3581	0.0011125	1	1	0.0898	0.712028	1	0	-0.424137	1.22667e-05	1	1	-0.0097	0.935	1	0	-0.239821	0.00880086	1	1	-0.23864	0.415763	1	0	-0.2	0.103	1	0	-0.187843	0.20306	1	0	-0.0433205	0.634244	1	0
1	protein_coding	ENSG00000066279	ASPM	6	0	0	-18	16	8	0.658	0.0393	1	1	-0.832328	0.0207212	1	-1	-1.43	0.003954	1	1	-1.77272	4.2453e-39	1	1	0.0417	0.861	1	0	0.253457	0.0072499	1	-1	-0.956484	0.13224	1	0	-1.94	5.46e-06	1	1	-2.23643	1.01405e-56	1	1	-2.37379	3.80572e-230	1	1
8	protein_coding	ENSG00000156802	ATAD2	6	0	0	-18	16	8	1.03	0.000843	1	1	-1.39477	0.0010834	1	-1	0.691	0.019673	1	-1	-0.58038	0.000195125	1	1	-0.221	0.0634	1	0	0.153914	0.0741412	1	0	0.138449	0.769565	1	0	-1.01	6.68e-05	1	1	-1.12748	2.28398e-16	1	1	-1.75957	4.05136e-117	1	1
3	protein_coding	ENSG00000176597	B3GNT5	6	1	1	-4	13	8	---	---	0	0	-0.217321	0.304304	1	0	-1.66	0.003031	1	1	-1.72975	5.45956e-38	1	1	---	---	0	0	0.38755	0.00222502	1	-1	2.0227	0.00966901	1	1	---	---	0	0	-0.540412	0.000230499	1	1	-0.358066	6.04807e-06	1	1
1	protein_coding	ENSG00000117411	B4GALT2	6	0	0	0	16	8	0.00242	0.989	1	0	-0.0523326	0.841641	1	0	0.00198	0.996664	1	0	-0.481583	1.58654e-05	1	1	0.0186	0.891	1	0	-0.0504134	0.437411	1	0	0.441648	0.107377	1	0	-0.405	0.00554	1	1	0.0461262	0.87052	1	0	-0.122085	0.391623	1	0
3	protein_coding	ENSG00000163930	BAP1	6	1	0	-1	16	8	0.127	0.506	1	0	1.39994	0.0022557	1	1	-0.385	0.14064	1	0	-0.662144	5.29316e-08	1	1	0.0472	0.585	1	0	-0.26772	0.0261253	1	1	-0.16624	0.640588	1	0	0.0437	0.79	1	0	-0.134102	0.565221	1	0	-0.258838	0.0234279	1	1
1	protein_coding	ENSG00000142867	BCL10	6	1	1	8	16	8	0.863	0.0157	1	1	-1.48305	0.0005968	1	-1	-0.678	0.023186	1	1	-0.712442	2.2018e-07	1	1	0.00247	0.983	1	0	-0.154729	0.0447794	1	1	-0.428215	0.153072	1	0	-0.037	0.824	1	0	-0.617738	0.00826239	1	1	-0.399377	0.00145287	1	1
2	protein_coding	ENSG00000074582	BCS1L	6	0	0	-7	16	8	-0.749	0.0019	1	-1	0.258635	0.210088	1	0	0.433	0.106534	1	0	-0.721997	0.000147648	1	1	-0.21	0.0157	1	1	-0.209061	0.0115032	1	1	-0.038342	0.950482	1	0	-0.124	0.33	1	0	0.147253	0.625895	1	0	-0.0752307	0.709315	1	0
9	protein_coding	ENSG00000185963	BICD2	6	0	0	2	15	8	0.298	0.146	1	0	1.77675	0.0003018	1	1	-1.33	0.003258	1	1	-1.28664	2.2447e-49	1	1	---	---	0	0	-0.12246	0.0683354	1	0	0.327381	0.28645	1	0	-0.202	0.145	1	0	-0.276527	0.133056	1	0	-0.289957	0.00394055	1	1
8	protein_coding	ENSG00000261236	BOP1	6	1	1	-9	16	8	-0.846	0.000715	1	-1	1.32288	0.0030675	1	1	1.12	0.019588	1	-1	-0.909058	8.56909e-12	1	1	-0.351	0.0286	1	1	0.0897264	0.388149	1	0	-0.482926	0.13102	1	0	-0.523	0.00223	1	1	-0.0213087	0.934923	1	0	-0.0887824	0.485193	1	0
11	protein_coding	ENSG00000174744	BRMS1	6	1	1	3	16	8	-0.193	0.154	1	0	1.13053	0.0025158	1	1	0.605	0.051884	1	0	-0.0111656	0.959927	1	0	-0.106	0.301	1	0	-0.347765	0.0023648	1	1	-0.148893	0.808895	1	0	-0.314	0.0159	1	1	-0.350936	0.070125	1	0	-0.315631	0.00300115	1	1
6	protein_coding	ENSG00000112578	BYSL	6	0	0	-5	16	8	-0.425	0.0046	1	-1	1.09496	0.0019626	1	1	1.02	0.016309	1	-1	-0.694958	6.94268e-05	1	1	-0.17	0.0515	1	0	-0.245569	0.00486687	1	1	0.167441	0.732025	1	0	-0.0116	0.943	1	0	-0.409913	0.0468741	1	1	-0.254843	0.128376	1	0
16	protein_coding	ENSG00000154102	C16orf74	6	1	1	-2	13	8	---	---	0	0	0.063575	0.806113	1	0	-0.814	0.026346	1	1	-1.64968	2.40498e-24	1	1	---	---	0	0	-0.150987	0.0447993	1	1	-0.788876	0.209979	1	0	---	---	0	0	-0.0272821	0.949551	1	0	-0.0917988	0.685535	1	0
1	protein_coding	ENSG00000000460	C1orf112	6	0	0	-12	16	8	1	0.00413	1	1	-0.0508085	0.890849	1	0	0.549	0.152035	1	0	-0.63566	0.0202651	1	1	-0.135	0.342	1	0	0.485523	0.00061564	1	-1	-0.295854	0.600414	1	0	-0.694	0.00789	1	1	-1.27031	8.12945e-11	1	1	-1.51178	3.83822e-26	1	1
1	protein_coding	ENSG00000162757	C1orf74	6	0	0	1	14	8	---	---	0	0	0.366836	0.0842423	1	0	-0.89	0.068011	1	0	-2.63894	1.17172e-87	1	1	-0.0787	0.344	1	0	-0.177726	0.0378145	1	1	-0.105436	0.891469	1	0	---	---	0	0	-0.38683	0.144538	1	0	-0.368403	0.00812282	1	1
1	protein_coding	ENSG00000116161	CACYBP	6	0	0	-10	16	8	0.099	0.49	1	0	0.653555	0.0133242	1	1	0.658	0.028441	1	-1	-0.529489	0.000144426	1	1	-0.089	0.351	1	0	-0.0702994	0.401179	1	0	-0.911522	0.000481925	1	-1	-0.522	0.00152	1	1	-0.356876	0.0207102	1	1	-0.37272	1.56917e-05	1	1
11	protein_coding	ENSG00000110619	CARS	6	0	1	-3	16	8	-0.39	0.0545	1	0	2.31234	0.0002313	1	1	0.372	0.2381	1	0	-0.528895	1.43751e-05	1	1	-0.0877	0.39	1	0	0.206442	0.00946565	1	-1	0.0634663	0.909083	1	0	-0.897	9.88e-05	1	1	-0.0893764	0.71356	1	0	-0.233652	0.0427978	1	1
7	protein_coding	ENSG00000105971	CAV2	6	1	1	5	16	8	0.228	0.452	1	0	-1.40356	0.0007528	1	-1	-1.15	0.012257	1	1	-1.77712	2.39043e-66	1	1	0.109	0.231	1	0	-0.261155	0.00789748	1	1	-0.391584	0.12558	1	0	-0.521	0.0025	1	1	-0.346004	0.0571219	1	0	-0.0434513	0.62438	1	0
1	protein_coding	ENSG00000122483	CCDC18	6	1	0	-7	13	8	---	---	0	0	0.672257	0.0095323	1	1	-0.282	0.216306	1	0	-0.554831	0.0465039	1	1	---	---	0	0	0.12058	0.190401	1	0	-0.466963	0.372177	1	0	---	---	0	0	-1.37211	3.77144e-08	1	1	-1.37099	8.32665e-17	1	1
11	protein_coding	ENSG00000109881	CCDC34	6	1	0	-6	14	8	---	---	0	0	-0.468513	0.44563	1	0	-0.27	0.736998	1	0	-0.0465248	0.909182	1	0	-0.328	0.000105	1	1	-0.250619	0.00633366	1	1	-0.994958	0.00573666	1	-1	---	---	0	0	-0.647796	0.0121031	1	1	-0.590446	0.00138506	1	1
19	protein_coding	ENSG00000117877	CD3EAP	6	1	1	-4	16	8	-0.541	0.0253	1	-1	0.105825	0.591743	1	0	0.841	0.02956	1	-1	-0.985778	0.0093159	1	1	-0.38	4.27e-05	1	1	-0.111699	0.0891836	1	0	1.0313	0.000125297	1	1	-0.578	0.00321	1	1	-0.274381	0.171876	1	0	0.0346059	0.862496	1	0
1	protein_coding	ENSG00000117399	CDC20	6	0	0	-18	16	8	-0.0459	0.902	1	0	-0.542019	0.0193918	1	-1	-1.21	0.003952	1	1	-3.05287	9.40764e-116	1	1	-0.288	0.0263	1	1	0.0331412	0.641516	1	0	-1.29126	0.038438	1	-1	-1.88	7.46e-06	1	1	-1.69549	2.45967e-36	1	1	-2.26134	6.56273e-117	1	1
20	protein_coding	ENSG00000101224	CDC25B	6	1	1	-14	16	8	-0.528	0.103	1	0	-0.316667	0.238598	1	0	-1.27	0.013389	1	1	-2.41551	2.64262e-88	1	1	0.166	0.147	1	0	-0.476	0.00088163	1	1	-1.04154	6.27632e-05	1	-1	-1.1	8.94e-05	1	1	-0.765879	3.27658e-10	1	1	-0.956597	7.62509e-37	1	1
11	protein_coding	ENSG00000146670	CDCA5	6	1	0	-17	14	8	---	---	0	0	-0.396789	0.11862	1	0	-0.342	0.329469	1	0	-2.38919	1.38438e-48	1	1	-0.285	0.0196	1	1	0.0757141	0.201511	1	0	-0.0477009	0.930848	1	0	---	---	0	0	-1.4672	9.20125e-25	1	1	-2.22227	2.49007e-97	1	1
7	protein_coding	ENSG00000164649	CDCA7L	6	0	0	-16	14	8	---	---	0	0	-1.10254	0.0022557	1	-1	0.577	0.102039	1	0	-1.06107	8.54082e-09	1	1	-0.0669	0.306	1	0	-0.212157	0.0129034	1	1	0.129425	0.784813	1	0	---	---	0	0	-0.305635	0.0653141	1	0	-0.381594	0.000441878	1	1
3	protein_coding	ENSG00000163814	CDCP1	6	0	1	-2	16	8	0.1	0.518	1	0	1.20214	0.0012145	1	1	-0.476	0.081535	1	0	-0.773089	6.35407e-17	1	1	0.0694	0.499	1	0	0.489417	0.00038842	1	-1	1.09107	2.86803e-05	1	1	-0.537	0.00253	1	1	-0.53433	0.000122709	1	1	-0.573566	3.88978e-17	1	1
10	protein_coding	ENSG00000170312	CDK1	6	0	0	-14	15	8	0.597	0.0287	1	1	-1.60176	0.0014349	1	-1	-0.978	0.014325	1	1	-1.92907	1.07083e-41	1	1	---	---	0	0	0.131134	0.250644	1	0	-0.515123	0.265218	1	0	-1.97	5.46e-06	1	1	-2.19893	9.30845e-33	1	1	-2.09697	1.59766e-128	1	1
14	protein_coding	ENSG00000100490	CDKL1	6	0	0	0	16	8	-0.424	0.107	1	0	0.354887	0.114466	1	0	-0.183	0.464391	1	0	-2.07458	0.00842311	1	1	-0.0767	0.248	1	0	0.0495799	0.518896	1	0	1.14687	0.0220276	1	1	-0.153	0.354	1	0	-0.923532	0.014316	1	1	-0.866756	0.00507516	1	1
14	protein_coding	ENSG00000100526	CDKN3	6	0	0	-19	15	8	0.0924	0.664	1	0	-0.473294	0.0870344	1	0	-0.937	0.019241	1	1	-2.02592	2.71223e-15	1	1	---	---	0	0	-0.200705	0.0954306	1	0	-1.16721	0.00534639	1	-1	-1.79	5.46e-06	1	1	-1.55426	2.76516e-11	1	1	-1.51425	1.45113e-20	1	1
16	protein_coding	ENSG00000167513	CDT1	6	0	0	-15	16	8	0.994	0.00327	1	1	-2.83688	0.0001847	1	-1	-1.2	0.009043	1	1	-1.90868	1.84355e-27	1	1	-0.0154	0.876	1	0	-0.0197944	0.763359	1	0	0.088525	0.850312	1	0	-1.33	1.44e-05	1	1	-0.337226	0.187305	1	0	-1.08781	2.74732e-09	1	1
X	protein_coding	ENSG00000102384	CENPI	6	0	0	-18	16	8	0.668	0.00572	1	1	0.245276	0.218895	1	0	-0.286	0.228711	1	0	-1.7041	2.34867e-13	1	1	0.0918	0.414	1	0	0.274768	0.0133178	1	-1	-0.418042	0.46226	1	0	-0.412	0.0104	1	1	-1.72099	7.76573e-12	1	1	-2.0934	2.51177e-25	1	1
5	protein_coding	ENSG00000123219	CENPK	6	0	0	-12	14	8	---	---	0	0	-0.664454	0.0104208	1	-1	-0.0286	0.916932	1	0	-1.54429	2.57746e-07	1	1	-0.345	0.0187	1	1	-0.0202123	0.833059	1	0	-0.493018	0.229807	1	0	---	---	0	0	-1.5133	1.01092e-10	1	1	-1.81429	2.95827e-28	1	1
6	protein_coding	ENSG00000031691	CENPQ	6	0	0	-12	15	7	0.985	0.0416	1	1	-0.82819	0.0110021	1	-1	0.125	0.822946	1	0	0.136124	0.720665	1	0	-0.286	0.00712	1	1	-0.0089273	0.933647	1	0	0.073304	0.8892	1	0	-0.371	0.0253	1	1	-1.1664	0.00267527	1	1	-1.90058	3.59858e-13	1	1
6	protein_coding	ENSG00000203760	CENPW	6	0	0	-8	13	8	---	---	0	0	-0.0289589	0.901613	1	0	-0.398	0.132972	1	0	-2.08464	3.3404e-19	1	1	---	---	0	0	0.162552	0.146107	1	0	0.176039	0.762738	1	0	---	---	0	0	-1.62955	3.48531e-09	1	1	-1.62303	1.30955e-19	1	1
9	protein_coding	ENSG00000148019	CEP78	6	0	0	-9	13	8	---	---	0	0	0.732357	0.0063481	1	1	1.19	0.003978	1	-1	-0.6336	8.66786e-05	1	1	---	---	0	0	-0.0128279	0.889904	1	0	-0.279231	0.413684	1	0	---	---	0	0	-0.977901	1.30923e-07	1	1	-0.968205	3.60836e-15	1	1
19	protein_coding	ENSG00000079432	CIC	6	1	1	1	16	8	0.133	0.446	1	0	-0.430472	0.118037	1	0	-0.212	0.515852	1	0	-0.66248	1.30306e-11	1	1	0.00527	0.968	1	0	-0.168554	0.0301339	1	1	0.754309	0.00157007	1	1	-0.308	0.0375	1	1	0.247865	0.311962	1	0	0.127206	0.315063	1	0
1	protein_coding	ENSG00000173207	CKS1B	6	1	0	-13	12	8	---	---	0	0	---	---	0	0	---	---	0	0	-0.399681	0.0267169	1	1	0.00458	0.965	1	0	-0.198002	0.015626	1	1	-0.972428	0.00210053	1	-1	---	---	0	0	-1.65016	2.44981e-08	1	1	-1.29303	3.85202e-11	1	1
11	protein_coding	ENSG00000166250	CLMP	6	0	0	-7	13	7	---	---	0	0	3.12246	9.31e-05	1	1	-0.131	0.58781	1	0	-1.81622	0.000604952	1	1	-0.0071	0.9	1	0	-0.0667601	0.482545	1	0	-0.135851	0.718962	1	0	---	---	0	0	-0.705374	6.69452e-09	1	1	-0.539296	1.97106e-17	1	1
1	protein_coding	ENSG00000092853	CLSPN	6	0	0	-13	14	8	---	---	0	0	0.268632	0.184536	1	0	0.232	0.336648	1	0	-1.35133	4.55603e-10	1	1	-0.00103	0.986	1	0	0.0489655	0.609241	1	0	0.555354	0.0345235	1	1	---	---	0	0	-1.00726	4.25745e-06	1	1	-1.68537	2.31137e-26	1	1
16	TEC	ENSG00000153815	CMIP	6	1	1	1	14	8	---	---	0	0	-0.686605	0.0084979	1	-1	-1.16	0.00456	1	1	-1.91721	9.42794e-50	1	1	-0.0766	0.531	1	0	-0.209805	0.00861456	1	1	1.07159	5.43011e-05	1	1	---	---	0	0	-0.325561	0.076627	1	0	-0.170752	0.111966	1	0
9	protein_coding	ENSG00000119397	CNTRL	6	1	0	-12	15	8	0.213	0.0851	1	0	-1.31976	0.0039927	1	-1	-0.618	0.043034	1	1	-0.700585	0.000126239	1	1	---	---	0	0	-0.081635	0.30671	1	0	-0.909455	0.0702915	1	0	-0.281	0.0274	1	1	-1.30011	4.31148e-06	1	1	-0.849154	3.55267e-07	1	1
3	protein_coding	ENSG00000114270	COL7A1	6	1	0	14	15	8	1.03	7.59e-05	1	1	1.16747	0.0214555	1	1	-0.568	0.215152	1	0	-1.56225	3.13074e-62	1	1	---	---	0	0	0.433425	0.00134154	1	-1	1.4586	3.64332e-06	1	1	-0.341	0.0242	1	1	1.41113	1.70809e-28	1	-1	1.29074	2.78713e-89	1	-1
12	protein_coding	ENSG00000110880	CORO1C	6	1	1	1	16	8	0.113	0.456	1	0	-0.965352	0.0053951	1	-1	-0.594	0.09929	1	0	-1.5708	1.31153e-54	1	1	0.316	0.00303	1	-1	-0.231374	0.00759251	1	1	-0.433086	0.15136	1	0	-0.945	0.000197	1	1	-0.462165	0.000393176	1	1	-0.343871	3.26801e-07	1	1
6	protein_coding	ENSG00000112297	CRYBG1	6	1	1	-6	15	8	0.8	0.000199	1	1	-0.183685	0.513424	1	0	0.0914	0.823452	1	0	-0.564416	8.39559e-10	1	1	---	---	0	0	-0.433459	0.00093205	1	1	1.11855	0.201567	1	0	-0.341	0.0173	1	1	-0.801285	1.82811e-07	1	1	-0.622068	1.4974e-12	1	1
20	protein_coding	ENSG00000124207	CSE1L	6	0	0	-6	16	8	-0.0927	0.343	1	0	1.17226	0.0036044	1	1	0.943	0.043506	1	-1	-0.357186	0.00132992	1	1	-0.199	0.476	1	0	0.114802	0.103285	1	0	-0.085362	0.861742	1	0	-0.448	0.00378	1	1	-0.856845	5.6388e-10	1	1	-0.804363	1.69622e-46	1	1
9	protein_coding	ENSG00000119326	CTNNAL1	6	1	0	-8	16	8	-0.316	0.0143	1	-1	-1.83041	0.000397	1	-1	-1.32	0.004192	1	1	-2.54093	1.23295e-115	1	1	-0.516	0.0339	1	1	-0.138873	0.115949	1	0	-0.374481	0.162148	1	0	-0.59	0.000874	1	1	-0.756479	6.03174e-06	1	1	-0.612921	1.6013e-10	1	1
1	protein_coding	ENSG00000171793	CTPS1	6	0	0	-4	16	8	-0.246	0.0971	1	0	1.64577	0.0003801	1	1	1.71	0.002818	1	-1	-0.907159	1.30693e-08	1	1	-0.232	0.0715	1	0	0.521288	0.00088056	1	-1	-0.343881	0.213294	1	0	-0.285	0.0364	1	1	-0.578973	5.69173e-05	1	1	-0.566861	1.31711e-12	1	1
15	protein_coding	ENSG00000103811	CTSH	6	1	1	4	15	8	-0.361	0.166	1	0	2.00377	0.0009963	1	1	0.0089	0.988123	1	0	-0.896499	2.4668e-08	1	1	---	---	0	0	0.0823766	0.261312	1	0	1.37286	0.000370889	1	1	-0.299	0.0225	1	1	0.284958	0.414812	1	0	0.344671	0.138207	1	0
2	protein_coding	ENSG00000163510	CWC22	6	0	0	-4	13	8	---	---	0	0	-0.755417	0.0135111	1	-1	-0.765	0.025829	1	1	-0.318997	0.0427978	1	1	---	---	0	0	-0.190767	0.0130664	1	1	-0.228203	0.524348	1	0	---	---	0	0	-0.55091	0.0214295	1	1	-0.284891	0.0425813	1	1
7	protein_coding	ENSG00000136271	DDX56	6	0	0	-3	16	8	-0.206	0.0708	1	0	1.48042	0.0012099	1	1	0.695	0.130876	1	0	-0.135956	0.41364	1	0	-0.263	0.0254	1	1	-0.116517	0.108247	1	0	0.0247168	0.955946	1	0	0.032	0.837	1	0	-0.302502	0.0657555	1	0	-0.228569	0.0256006	1	1
5	protein_coding	ENSG00000035499	DEPDC1B	6	0	0	-17	14	8	---	---	0	0	-1.48977	0.0013401	1	-1	-0.886	0.020805	1	1	-2.82926	6.75429e-52	1	1	-0.861	3.07e-07	1	1	-0.0331626	0.639712	1	0	-0.417666	0.559764	1	0	---	---	0	0	-1.85354	2.86257e-20	1	1	-2.1546	2.60832e-43	1	1
13	protein_coding	ENSG00000102780	DGKH	6	0	0	3	14	8	---	---	0	0	-1.33166	0.0031077	1	-1	-0.771	0.013589	1	1	-1.40533	1.56243e-28	1	1	-0.0282	0.543	1	0	0.0116768	0.871551	1	0	1.71258	6.6107e-14	1	1	---	---	0	0	-0.469266	0.00975229	1	1	-0.467581	1.44389e-06	1	1
4	protein_coding	ENSG00000109606	DHX15	6	0	0	-8	16	8	0.2	0.0656	1	0	2.34315	0.0012698	1	1	0.887	0.089266	1	0	-0.288457	0.0043041	1	1	-0.249	0.107	1	0	0.090767	0.140772	1	0	-0.211534	0.494015	1	0	0.0617	0.68	1	0	-0.3618	0.00740579	1	1	-0.310461	7.42383e-06	1	1
5	protein_coding	ENSG00000086189	DIMT1	6	0	0	-3	16	8	-0.637	0.000846	1	-1	1.58172	0.0069046	1	1	0.228	0.532597	1	0	-0.49349	0.000730188	1	1	-0.0178	0.91	1	0	-0.383504	0.00271795	1	1	-0.192665	0.603371	1	0	-0.252	0.0395	1	1	-0.324682	0.0990631	1	0	-0.217227	0.104827	1	0
10	protein_coding	ENSG00000213551	DNAJC9	6	0	1	-12	16	8	0.0366	0.801	1	0	1.12226	0.0017652	1	1	1.36	0.003545	1	-1	0.047198	0.858394	1	0	-0.0952	0.435	1	0	-0.0819472	0.19885	1	0	0.0902091	0.827471	1	0	-0.653	0.000453	1	1	-0.986118	1.32967e-08	1	1	-1.22703	1.09671e-22	1	1
4	protein_coding	ENSG00000175920	DOK7	6	1	1	0	13	8	---	---	0	0	0.0499301	0.803382	1	0	-0.149	0.532332	1	0	-6.49625	6.47043e-13	1	1	---	---	0	0	0.0561599	0.351357	1	0	-2.4874	0.256233	1	0	---	---	0	0	-2.18389	0.0136285	1	1	-1.7875	0.00904077	1	1
7	protein_coding	ENSG00000173852	DPY19L1	6	0	0	0	15	8	0.356	0.0229	1	1	0.468427	0.0321154	1	1	-0.064	0.824856	1	0	-1.38498	8.47953e-18	1	1	---	---	0	0	0.348842	0.0120591	1	-1	0.287924	0.411472	1	0	-0.351	0.0251	1	1	-0.395367	0.0367085	1	1	-0.440975	4.80433e-05	1	1
18	protein_coding	ENSG00000134762	DSC3	6	1	1	5	15	7	-0.118	0.319	1	0	-0.895087	0.0055334	1	-1	-1.74	0.003377	1	1	-0.193937	0.0506636	1	0	-0.145	0.00698	1	1	-0.022691	0.72837	1	0	0.403534	0.875714	1	0	-0.682	0.00037	1	1	-0.296181	0.0564598	1	0	-0.0855492	0.329237	1	0
1	protein_coding	ENSG00000143476	DTL	6	0	0	-18	16	8	1.12	6.84e-05	1	1	0.35898	0.197267	1	0	0.546	0.071928	1	0	-1.6339	2.65651e-15	1	1	-0.272	0.222	1	0	0.138272	0.0823272	1	0	0.397031	0.173851	1	0	-1.44	0.000117	1	1	-0.674107	4.25139e-05	1	1	-1.83964	3.41062e-50	1	1
1	protein_coding	ENSG00000143479	DYRK3	6	1	1	7	16	8	0.0329	0.787	1	0	-0.319346	0.140727	1	0	-1.14	0.008166	1	1	-2.81924	2.33551e-41	1	1	-0.122	0.107	1	0	-0.0268685	0.751135	1	0	-0.126374	0.871334	1	0	-0.473	0.00353	1	1	-0.573685	0.00510149	1	1	-0.368428	0.00355929	1	1
16	protein_coding	ENSG00000205250	E2F4	6	0	0	-4	16	8	0.0336	0.78	1	0	1.06228	0.0024015	1	1	0.579	0.054944	1	0	-0.0662114	0.716515	1	0	-0.198	0.0489	1	1	-0.235795	0.0214569	1	1	0.369032	0.246084	1	0	-0.231	0.0569	1	0	0.0417127	0.878838	1	0	-0.0406045	0.806158	1	0
1	protein_coding	ENSG00000186197	EDARADD	6	1	1	1	14	8	---	---	0	0	-0.0990194	0.676323	1	0	-0.229	0.431955	1	0	-1.20071	0.00521336	1	1	-0.554	0.000248	1	1	-0.577228	0.00063231	1	1	-0.149057	0.908651	1	0	---	---	0	0	-0.795299	0.697665	1	0	-0.126442	0.940873	1	0
11	protein_coding	ENSG00000149547	EI24	6	0	1	13	16	8	0.33	0.0108	1	1	0.289702	0.186784	1	0	-0.399	0.132141	1	0	-1.69056	6.01912e-61	1	1	-0.0702	0.322	1	0	-0.0293259	0.689528	1	0	0.747911	0.00181133	1	1	-0.0719	0.614	1	0	-0.299004	0.0331911	1	1	-0.157833	0.0213439	1	1
1	protein_coding	ENSG00000070785	EIF2B3	6	0	0	-6	16	8	-0.574	0.00607	1	-1	0.917985	0.0150776	1	1	0.829	0.049834	1	-1	-0.156193	0.513735	1	0	-0.258	0.0302	1	1	-0.106647	0.207684	1	0	-0.185157	0.634725	1	0	-0.404	0.00545	1	1	-0.445586	0.0329472	1	1	-0.429603	0.000884654	1	1
17	protein_coding	ENSG00000141543	EIF4A3	6	0	0	-1	16	8	-0.104	0.597	1	0	0.237574	0.255457	1	0	-0.0108	0.975125	1	0	-0.650167	4.69756e-08	1	1	-0.134	0.125	1	0	-0.1247	0.0559106	1	0	0.587558	0.0330381	1	1	0.0494	0.723	1	0	-0.373714	0.0243852	1	1	-0.438356	1.25372e-05	1	1
3	protein_coding	ENSG00000114867	EIF4G1	6	0	0	-2	15	8	-0.123	0.79	1	0	1.39674	0.000713	1	1	0.396	0.108728	1	0	-0.627511	1.23676e-13	1	1	---	---	0	0	0.045743	0.537706	1	0	0.17363	0.59856	1	0	-0.781	0.000251	1	1	-0.222716	0.104103	1	0	-0.290513	6.69456e-07	1	1
17	protein_coding	ENSG00000132507	EIF5A	6	0	1	-4	16	8	-0.249	0.0602	1	0	5.3177	0.0002675	1	1	0.144	0.625152	1	0	-0.925351	3.54584e-21	1	1	-0.251	0.135	1	0	0.132221	0.261819	1	0	-0.491903	0.0413751	1	-1	-0.535	0.00826	1	1	-0.0929434	0.640817	1	0	-0.244337	0.000863141	1	1
1	protein_coding	ENSG00000158711	ELK4	6	1	0	1	16	8	-0.214	0.117	1	0	-0.688208	0.0073505	1	-1	-0.554	0.058523	1	0	-0.831011	1.43754e-11	1	1	-0.108	0.185	1	0	-0.188705	0.0125455	1	1	0.505309	0.0648244	1	0	-0.307	0.0318	1	1	-0.577649	0.000329506	1	1	-0.292769	0.00037147	1	1
11	protein_coding	ENSG00000158636	EMSY	6	0	0	-2	16	8	0.091	0.578	1	0	0.530705	0.0240523	1	1	0.243	0.41088	1	0	-0.419826	0.0206019	1	1	-0.188	0.00208	1	1	-0.161814	0.0325311	1	1	0.292855	0.43919	1	0	-0.0168	0.92	1	0	-0.379772	0.0961348	1	0	-0.555128	5.29295e-05	1	1
19	protein_coding	ENSG00000105722	ERF	6	0	0	-5	16	8	0.234	0.231	1	0	-0.168856	0.466878	1	0	-0.325	0.187647	1	0	-1.62567	3.34028e-60	1	1	-0.0307	0.777	1	0	-0.301721	0.0144913	1	1	0.126693	0.782901	1	0	-0.325	0.0232	1	1	-0.0536903	0.841929	1	0	0.0738015	0.664823	1	0
1	protein_coding	ENSG00000174371	EXO1	6	0	0	-17	16	8	0.77	0.00356	1	1	-0.29042	0.420087	1	0	0.243	0.36733	1	0	-1.44778	1.90099e-08	1	1	-0.287	0.0565	1	0	0.473256	0.00178508	1	-1	0.38786	0.34725	1	0	-0.795	0.000174	1	1	-0.891727	7.32958e-08	1	1	-1.76359	5.42644e-40	1	1
9	protein_coding	ENSG00000130713	EXOSC2	6	0	0	-13	16	8	-0.609	0.00226	1	-1	1.4513	0.0005654	1	1	1.01	0.006078	1	-1	-0.247182	0.224867	1	0	-0.254	0.0407	1	1	-0.100461	0.209676	1	0	-0.366043	0.323119	1	0	-0.671	0.000386	1	1	-0.549526	0.00362843	1	1	-0.709564	5.92915e-08	1	1
13	protein_coding	ENSG00000120699	EXOSC8	6	0	0	-14	16	8	-0.674	0.00143	1	-1	-0.17929	0.389156	1	0	0.298	0.238118	1	0	0.134471	0.610342	1	0	-0.159	0.0378	1	1	-0.266359	0.0453226	1	1	-0.391793	0.355168	1	0	-1.03	5.87e-05	1	1	-0.526539	0.00148754	1	1	-0.841533	2.59365e-16	1	1
7	protein_coding	ENSG00000106462	EZH2	6	0	0	-12	16	8	-0.33	0.0639	1	0	-0.0390293	0.877481	1	0	0.421	0.123417	1	0	-0.0876286	0.75769	1	0	-0.104	0.584	1	0	0.0647845	0.27038	1	0	-0.00847096	0.98674	1	0	-0.854	0.000178	1	1	-0.632633	0.000481873	1	1	-1.08886	2.36512e-19	1	1
7	protein_coding	ENSG00000122591	FAM126A	6	0	0	-2	14	8	---	---	0	0	-1.01837	0.0019655	1	-1	-1.35	0.005231	1	1	-0.447425	0.000479213	1	1	-0.0723	0.621	1	0	-0.0147228	0.848695	1	0	-0.299406	0.279356	1	0	---	---	0	0	-0.574862	0.000243716	1	1	-0.483273	4.81705e-08	1	1
1	protein_coding	ENSG00000135842	FAM129A	6	0	0	-4	14	7	-0.428	0.0449	1	-1	-0.836988	0.0057656	1	-1	-0.98	0.009851	1	1	-0.302972	0.0311992	1	1	---	---	0	0	-0.122889	0.102492	1	0	-0.170661	0.756478	1	0	-0.231	0.0802	1	0	-3.25551	2.57919e-08	1	1	-3.21818	9.48166e-17	1	1
5	protein_coding	ENSG00000198780	FAM169A	6	0	0	5	15	8	-0.374	0.256	1	0	-0.968324	0.0021599	1	-1	-0.526	0.085353	1	0	-1.9777	4.76854e-33	1	1	---	---	0	0	-0.52357	0.00031442	1	1	1.68759	5.18694e-05	1	1	-0.263	0.0437	1	1	-1.28224	2.20865e-06	1	1	-1.17096	1.37902e-12	1	1
8	protein_coding	ENSG00000153310	FAM49B	6	1	1	0	16	8	0.388	0.018	1	1	0.869414	0.0071223	1	1	1.05	0.009272	1	-1	-0.130216	0.459039	1	0	-0.31	0.000138	1	1	-0.263384	0.00979205	1	1	-0.344825	0.295195	1	0	0.0899	0.516	1	0	-0.487903	0.000615957	1	1	-0.348292	7.07838e-06	1	1
10	protein_coding	ENSG00000189319	FAM53B	6	0	1	0	15	8	-0.0262	0.858	1	0	0.523339	0.0426823	1	1	-0.257	0.297555	1	0	-0.158994	0.256429	1	0	---	---	0	0	-0.428538	0.00103302	1	1	0.794508	0.00944162	1	1	0.0242	0.888	1	0	-0.107379	0.749232	1	0	-0.0164156	0.95356	1	0
17	protein_coding	ENSG00000188522	FAM83G	6	1	1	1	13	8	---	---	0	0	0.435551	0.0413449	1	1	-0.989	0.006049	1	1	-0.944012	4.80133e-20	1	1	---	---	0	0	-0.20219	0.0597156	1	0	0.500508	0.044527	1	1	---	---	0	0	0.13863	0.528198	1	0	0.170389	0.144472	1	0
8	protein_coding	ENSG00000180921	FAM83H	6	1	0	10	13	8	---	---	0	0	0.5341	0.05097	1	0	0.198	0.385548	1	0	-0.332516	0.000854956	1	1	---	---	0	0	-0.199537	0.0152911	1	1	2.4863	2.19251e-26	1	1	---	---	0	0	0.0102615	0.962292	1	0	0.0739803	0.363271	1	0
X	protein_coding	ENSG00000181544	FANCB	6	0	0	-10	14	8	---	---	0	0	0.446232	0.037353	1	1	0.235	0.372364	1	0	-1.12027	0.000629582	1	1	-0.0792	0.299	1	0	0.142781	0.143319	1	0	-0.0242673	0.973079	1	0	---	---	0	0	-1.54146	0.0023858	1	1	-1.79282	8.26587e-06	1	1
2	protein_coding	ENSG00000116120	FARSB	6	0	0	-11	14	8	---	---	0	0	0.587413	0.0224681	1	1	0.515	0.04477	1	-1	-0.284816	0.039087	1	1	-0.361	0.000738	1	1	-0.0716629	0.363346	1	0	-0.449571	0.114561	1	0	---	---	0	0	-0.225648	0.198028	1	0	-0.293085	0.000699886	1	1
X	protein_coding	ENSG00000102302	FGD1	6	0	0	-3	16	8	-0.0877	0.404	1	0	0.186267	0.495948	1	0	-0.176	0.611027	1	0	-0.401429	0.00798157	1	1	-0.0174	0.749	1	0	-0.317917	0.00207054	1	1	-0.614691	0.0630392	1	0	-0.635	0.00141	1	1	0.0587857	0.867674	1	0	-0.194339	0.299923	1	0
11	protein_coding	ENSG00000179431	FJX1	6	1	0	-5	16	8	-0.0945	0.499	1	0	-0.0989645	0.655769	1	0	0.139	0.715576	1	0	-2.1372	1.04449e-53	1	1	-0.398	0.0324	1	1	0.17602	0.0237695	1	-1	0.219259	0.569522	1	0	-0.405	0.0067	1	1	-0.373103	0.112756	1	0	-0.189524	0.308071	1	0
2	protein_coding	ENSG00000170802	FOXN2	6	0	1	2	16	8	0.094	0.539	1	0	-0.9485	0.0025864	1	-1	-1.38	0.004091	1	1	-1.68985	1.62889e-48	1	1	-0.0202	0.745	1	0	-0.415943	0.00078502	1	1	0.171562	0.682013	1	0	0.122	0.357	1	0	-0.619539	0.00202278	1	1	-0.541428	5.08767e-06	1	1
5	protein_coding	ENSG00000134363	FST	6	0	0	4	15	7	1.36	0.000343	1	1	-2.45651	0.0004827	1	-1	-2.1	0.010278	1	1	-6.04498	1.59583e-38	1	1	-1.31	5.87e-08	1	1	0.725008	0.00059028	1	-1	-2.84696	0.0278491	1	-1	-0.545	0.00135	1	1	-1.52521	5.33857e-16	1	1	-0.887573	1.45803e-11	1	1
1	protein_coding	ENSG00000162613	FUBP1	6	0	0	-4	16	8	0.407	0.0385	1	1	1.38374	0.0009588	1	1	0.965	0.007779	1	-1	-0.250566	0.050199	1	0	-0.375	0.00587	1	1	0.264759	0.00270913	1	-1	-0.132158	0.805388	1	0	-0.318	0.0446	1	1	-0.448047	0.00170227	1	1	-0.582344	2.91877e-12	1	1
15	protein_coding	ENSG00000214013	GANC	6	0	0	3	13	8	---	---	0	0	-2.16113	0.0002562	1	-1	-1.38	0.00349	1	1	-0.69815	1.03352e-06	1	1	---	---	0	0	-0.279274	0.00859568	1	1	1.35935	1.85794e-07	1	1	---	---	0	0	-0.186245	0.564857	1	0	-0.334612	0.0634845	1	0
17	protein_coding	ENSG00000007237	GAS7	6	0	1	2	12	4	0.179	0.314	1	0	1.56542	0.000447	1	1	-1.02	0.007216	1	1	-1.15375	1.11543e-09	1	1	0.0247	0.842	1	0	0.003257	0.976276	1	0	0.95867	0.0275921	1	1	0.216	0.214	1	0	---	---	0	0	---	---	0	0
17	protein_coding	ENSG00000179409	GEMIN4	6	0	0	-12	16	8	-0.0725	0.558	1	0	-0.511125	0.0272372	1	-1	0.14	0.562234	1	0	-0.768633	5.39034e-06	1	1	-0.204	0.197	1	0	-0.218338	0.0343318	1	1	0.0416587	0.931589	1	0	-0.42	0.00829	1	1	-0.33923	0.065232	1	0	-0.41983	0.000657829	1	1
17	protein_coding	ENSG00000108262	GIT1	6	1	0	4	16	8	0.0198	0.926	1	0	-0.251564	0.201562	1	0	-0.325	0.194805	1	0	-0.590646	1.90094e-07	1	1	0.00128	0.99	1	0	-0.20042	0.0304803	1	1	1.0713	8.00361e-06	1	1	-0.259	0.0392	1	1	0.0680693	0.81326	1	0	-0.0230974	0.900787	1	0
1	protein_coding	ENSG00000188910	GJB3	6	0	0	4	14	8	0.439	0.0156	1	1	-0.394287	0.0898294	1	0	-1.1	0.007648	1	1	-1.36076	5.55113e-55	1	1	0.205	0.016	1	-1	---	---	0	0	1.99253	0.00169562	1	1	-0.499	0.00203	1	1	0.073919	0.734677	1	0	0.0708595	0.485183	1	0
1	protein_coding	ENSG00000189280	GJB5	6	1	1	5	16	8	0.497	0.00438	1	1	1.22523	0.0012009	1	1	-0.559	0.054048	1	0	-0.311594	0.0267678	1	1	0.195	0.00186	1	-1	-0.0787715	0.319173	1	0	4.01939	8.50033e-11	1	1	-0.343	0.0117	1	1	0.0599157	0.829904	1	0	0.168272	0.245702	1	0
6	protein_coding	ENSG00000112312	GMNN	6	0	0	-10	15	8	0.829	0.000793	1	1	-0.452571	0.0552642	1	0	0.136	0.567179	1	0	-0.391141	0.0633957	1	0	---	---	0	0	0.0312486	0.694077	1	0	0.084052	0.880917	1	0	-0.578	0.00136	1	1	-0.78386	2.1557e-05	1	1	-1.0568	4.11546e-14	1	1
7	protein_coding	ENSG00000127955	GNAI1	6	1	1	5	16	8	0.257	0.339	1	0	-0.669538	0.0087369	1	-1	-2.08	0.001595	1	1	-0.941731	3.68787e-15	1	1	-0.0663	0.237	1	0	-0.177615	0.0535622	1	0	-0.582022	0.114488	1	0	0.088	0.596	1	0	-0.289316	0.14022	1	0	-0.159027	0.181571	1	0
18	protein_coding	ENSG00000141404	GNAL	6	0	0	-4	15	8	0.552	0.00442	1	1	0.742825	0.0277496	1	1	-1.15	0.00439	1	1	-0.367869	0.196448	1	0	---	---	0	0	0.0942576	0.239583	1	0	-0.678508	0.592217	1	0	-0.567	0.00508	1	1	0.695839	0.656385	1	0	0.666558	0.582708	1	0
3	protein_coding	ENSG00000114450	GNB4	6	0	0	-9	14	8	---	---	0	0	0.899132	0.0033949	1	1	0.98	0.00797	1	-1	-0.456039	0.00216976	1	1	0.118	0.156	1	0	0.0043452	0.95986	1	0	0.39814	0.190707	1	0	---	---	0	0	-0.992194	2.61439e-09	1	1	-0.879174	1.84695e-20	1	1
3	protein_coding	ENSG00000184897	H1FX	6	0	1	-13	15	8	0.408	0.242	1	0	-0.296464	0.141916	1	0	-0.964	0.006705	1	1	-2.7038	4.90109e-22	1	1	---	---	0	0	-0.316817	0.00271684	1	1	0.0258967	0.960593	1	0	-0.445	0.013	1	1	-0.67868	0.0170973	1	1	-0.641719	0.00110905	1	1
5	protein_coding	ENSG00000170445	HARS	6	0	0	1	16	8	-0.168	0.569	1	0	0.778089	0.005792	1	1	0.596	0.032543	1	-1	-0.374754	0.00150122	1	1	-0.226	0.0046	1	1	-0.154359	0.0419003	1	1	-0.267061	0.360005	1	0	-0.0153	0.931	1	0	-0.123975	0.523194	1	0	-0.238045	0.00241583	1	1
15	protein_coding	ENSG00000137814	HAUS2	6	0	0	-11	16	8	0.185	0.107	1	0	0.655502	0.0404528	1	1	0.38	0.232085	1	0	-0.204082	0.255395	1	0	-0.214	0.00777	1	1	-0.248352	0.0165514	1	1	0.0706769	0.876555	1	0	0.335	0.0204	1	-1	-0.963293	8.26826e-08	1	1	-0.840285	6.22252e-14	1	1
X	protein_coding	ENSG00000172534	HCFC1	6	0	0	-5	16	8	0.0996	0.606	1	0	0.719423	0.0104208	1	1	0.557	0.057293	1	0	-0.508404	2.12082e-06	1	1	-0.237	0.0145	1	1	-0.103446	0.300541	1	0	0.406175	0.304221	1	0	-0.136	0.285	1	0	-0.226975	0.265739	1	0	-0.322091	0.00146431	1	1
10	protein_coding	ENSG00000119969	HELLS	6	0	1	-9	16	8	0.565	0.0046	1	1	1.55527	0.0009277	1	1	1.48	0.002547	1	-1	-1.76517	9.38186e-25	1	1	-0.181	0.198	1	0	0.309858	0.0217603	1	-1	0.66278	0.125781	1	0	-0.991	0.000176	1	1	-1.04914	1.30903e-12	1	1	-1.4534	1.63696e-45	1	1
14	protein_coding	ENSG00000100644	HIF1A	6	0	0	-2	16	8	0.167	0.516	1	0	-0.0208722	0.930732	1	0	-0.592	0.046173	1	1	-0.455597	5.62914e-06	1	1	-0.122	0.519	1	0	-0.0769745	0.31837	1	0	0.418147	0.252125	1	0	-0.272	0.0475	1	1	-0.392822	0.0112892	1	1	-0.400743	7.62027e-08	1	1
1	protein_coding	ENSG00000163349	HIPK1	6	0	0	-3	16	8	-0.205	0.586	1	0	1.03644	0.0046556	1	1	-0.316	0.229457	1	0	-0.00191713	0.991756	1	0	-0.0111	0.921	1	0	-0.0250986	0.746031	1	0	0.55084	0.0990752	1	0	-0.466	0.004	1	1	-0.571347	0.00188747	1	1	-0.707296	1.63818e-10	1	1
2	protein_coding	ENSG00000170144	HNRNPA3	6	0	0	-5	15	8	0.247	0.529	1	0	1.21023	0.0020575	1	1	0.493	0.057704	1	0	-0.92718	2.88306e-12	1	1	---	---	0	0	0.148399	0.0638828	1	0	-0.255443	0.40629	1	0	-0.604	0.00697	1	1	-0.353005	0.0217123	1	1	-0.314909	1.58833e-05	1	1
10	protein_coding	ENSG00000169813	HNRNPF	6	0	0	-9	16	8	-0.0685	0.839	1	0	1.5281	0.0020743	1	1	0.361	0.377683	1	0	-0.198225	0.0871624	1	0	-0.148	0.0854	1	0	-0.178019	0.020001	1	1	0.0689781	0.893203	1	0	-0.00896	0.956	1	0	-0.373663	0.0031852	1	1	-0.493109	3.98387e-13	1	1
19	protein_coding	ENSG00000104824	HNRNPL	6	0	1	-4	16	8	0.184	0.223	1	0	0.914073	0.0076182	1	1	0.769	0.212246	1	0	-0.329432	0.0021041	1	1	-0.0427	0.645	1	0	-0.060233	0.315215	1	0	-0.241448	0.449886	1	0	-0.355	0.0125	1	1	-0.363212	0.0146442	1	1	-0.255383	0.00107033	1	1
1	protein_coding	ENSG00000125944	HNRNPR	6	0	0	-9	16	8	-0.229	0.0531	1	0	0.781127	0.0104829	1	1	1	0.011389	1	-1	-0.234831	0.0381293	1	1	-0.406	0.000472	1	1	-0.0029389	0.968282	1	0	-0.848732	0.00169124	1	-1	-0.147	0.215	1	0	-0.494178	0.00267785	1	1	-0.415439	7.33669e-08	1	1
12	protein_coding	ENSG00000167779	IGFBP6	6	0	0	4	15	7	0.685	0.0104	1	1	-0.359224	0.19977	1	0	-2.51	0.002054	1	1	-3.80585	7.08482e-121	1	1	0.676	0.000198	1	-1	0.113456	0.106326	1	0	0.408575	0.2047	1	0	-0.414	0.00795	1	1	-1.35961	1.0567e-19	1	1	-1.32434	2.16981e-47	1	1
12	protein_coding	ENSG00000166130	IKBIP	6	1	1	15	14	8	---	---	0	0	-0.776687	0.0300249	1	-1	-2.58	0.001557	1	1	-2.68424	3.4839e-45	1	1	-0.213	0.00352	1	1	0.177759	0.015361	1	-1	-0.417281	0.106253	1	0	---	---	0	0	-1.28053	8.43031e-11	1	1	-0.882139	1.02315e-21	1	1
3	protein_coding	ENSG00000185614	INKA1	6	1	1	3	13	8	---	---	0	0	0.286328	0.243794	1	0	-0.519	0.078184	1	0	-2.28386	5.62778e-14	1	1	---	---	0	0	-0.43016	0.00156049	1	1	1.48247	0.046185	1	1	---	---	0	0	-0.12769	0.829585	1	0	-0.413487	0.271749	1	0
15	protein_coding	ENSG00000136381	IREB2	6	0	0	2	15	8	-0.25	0.513	1	0	0.555678	0.0370486	1	1	0.424	0.106308	1	0	-0.737423	8.3904e-08	1	1	---	---	0	0	-0.192884	0.0357992	1	1	0.0442006	0.924054	1	0	0.0555	0.795	1	0	-0.526274	0.00330007	1	1	-0.321993	0.00183631	1	1
17	protein_coding	ENSG00000132470	ITGB4	6	1	1	0	16	8	-0.155	0.444	1	0	1.90079	0.0003704	1	1	0.557	0.077862	1	0	-0.937482	1.3552e-27	1	1	-0.0439	0.514	1	0	0.213327	0.011575	1	-1	6.2007	1.31926e-49	1	1	-2.26	5.42e-06	1	1	0.915148	4.83008e-13	1	-1	0.794006	3.53729e-41	1	-1
1	protein_coding	ENSG00000189337	KAZN	6	0	1	1	15	8	0.09	0.553	1	0	1.06133	0.0024748	1	1	-0.589	0.031588	1	1	-0.446876	0.00129288	1	1	---	---	0	0	-0.0295243	0.784551	1	0	1.37489	1.247e-08	1	1	-0.326	0.0173	1	1	-0.10882	0.771188	1	0	-0.213382	0.2676	1	0
6	protein_coding	ENSG00000165097	KDM1B	6	1	1	0	13	8	---	---	0	0	-0.160597	0.466827	1	0	-0.784	0.038087	1	1	-0.474238	0.000975607	1	1	---	---	0	0	-0.376352	0.00089545	1	1	0.449847	0.187996	1	0	---	---	0	0	-0.158065	0.627187	1	0	0.0431248	0.835414	1	0
15	protein_coding	ENSG00000137807	KIF23	6	0	0	-19	16	8	0.322	0.0794	1	0	-0.529783	0.118599	1	0	0.113	0.818332	1	0	-1.8819	1.99864e-40	1	1	-0.847	1.18e-05	1	1	0.132423	0.0396741	1	-1	-0.567813	0.291256	1	0	-1.47	9.16e-05	1	1	-1.72488	2.75171e-40	1	1	-2.10766	7.07983e-118	1	1
5	protein_coding	ENSG00000068796	KIF2A	6	0	0	-5	16	8	-0.177	0.211	1	0	-0.341937	0.0840851	1	0	0.492	0.065096	1	0	-0.457537	0.000688999	1	1	-0.183	0.153	1	0	-0.184638	0.018512	1	1	-0.0547436	0.903669	1	0	0.00768	0.974	1	0	-0.460767	0.0234555	1	1	-0.415045	0.00208659	1	1
4	protein_coding	ENSG00000109466	KLHL2	6	1	0	-1	16	8	-0.117	0.783	1	0	-0.230737	0.395894	1	0	0.142	0.695728	1	0	0.184543	0.406974	1	0	-0.255	0.00701	1	1	-0.245298	0.0100042	1	1	0.749564	0.00566158	1	1	-0.692	0.00228	1	1	-0.641234	0.0190599	1	1	-0.374635	0.0448817	1	1
1	protein_coding	ENSG00000162413	KLHL21	6	0	0	4	16	8	0.565	0.0082	1	1	-1.07459	0.001631	1	-1	-0.177	0.444521	1	0	-2.81744	3.04894e-215	1	1	-0.12	0.0688	1	0	-0.249021	0.018212	1	1	0.615738	0.134105	1	0	-0.302	0.019	1	1	-0.33554	0.113772	1	0	-0.432655	0.000213299	1	1
13	protein_coding	ENSG00000102753	KPNA3	6	0	0	-6	16	8	-0.122	0.376	1	0	1.43777	0.0044823	1	1	0.407	0.113313	1	0	-0.518584	1.81186e-05	1	1	-0.136	0.161	1	0	-0.0383311	0.545547	1	0	-0.459093	0.128129	1	0	0.197	0.0986	1	0	-0.427513	0.00290285	1	1	-0.396525	8.67621e-07	1	1
12	protein_coding	ENSG00000185479	KRT6B	6	0	1	1	14	6	3.26	9.11e-06	1	1	2.41165	0.0002604	1	1	-0.767	0.028311	1	1	-2.85982	3.30145e-141	1	1	0.0096	0.88	1	0	-0.552495	0.00078502	1	1	---	---	0	0	-1.17	6.12e-05	1	1	0.0401395	0.910084	1	0	0.0511496	0.781997	1	0
19	protein_coding	ENSG00000176619	LMNB2	6	0	0	-14	16	8	0.159	0.365	1	0	0.605673	0.0162923	1	1	0.848	0.010726	1	-1	-1.04628	5.29117e-30	1	1	-0.0758	0.646	1	0	0.130476	0.113938	1	0	-0.511791	0.123325	1	0	-0.897	0.000105	1	1	-0.977359	7.40377e-18	1	1	-1.17176	4.19314e-59	1	1
4	protein_coding	ENSG00000164167	LSM6	6	0	0	-7	16	8	0.114	0.338	1	0	-0.355865	0.0766624	1	0	-0.954	0.009205	1	1	-1.58662	8.20943e-08	1	1	-0.251	0.00197	1	1	-0.122167	0.0865293	1	0	-0.339346	0.463441	1	0	-0.598	0.000714	1	1	-0.507263	0.114802	1	0	-0.36498	0.103451	1	0
6	protein_coding	ENSG00000135521	LTV1	6	0	0	-4	14	8	---	---	0	0	0.927573	0.0037201	1	1	1.11	0.008716	1	-1	0.183167	0.531424	1	0	-0.294	0.0201	1	1	-0.235856	0.0242158	1	1	-0.394371	0.328056	1	0	---	---	0	0	-0.422852	0.0448779	1	1	-0.156079	0.351371	1	0
1	protein_coding	ENSG00000169641	LUZP1	6	1	1	4	15	8	1.03	0.000125	1	1	2.14835	0.0103736	1	1	-0.635	0.025744	1	1	-0.857759	3.79905e-16	1	1	---	---	0	0	-0.0709692	0.286301	1	0	0.952566	0.00134101	1	1	-0.247	0.0523	1	0	-0.303798	0.0804706	1	0	-0.265735	0.00698219	1	1
4	protein_coding	ENSG00000164109	MAD2L1	6	0	0	-18	16	8	0.504	0.164	1	0	2.98638	9.75e-05	1	1	-0.495	0.108006	1	0	-1.8543	1.70429e-28	1	1	-0.301	0.00916	1	1	0.0558753	0.643061	1	0	-0.739805	0.0448928	1	-1	-1.46	7.38e-05	1	1	-1.94138	1.34672e-39	1	1	-2.17024	2.38748e-107	1	1
14	protein_coding	ENSG00000006432	MAP3K9	6	1	1	-1	15	8	0.942	0.000531	1	1	-0.351177	0.384322	1	0	-0.416	0.106308	1	0	-1.85802	3.67124e-89	1	1	---	---	0	0	0.0792687	0.307125	1	0	1.74745	8.31581e-10	1	1	-0.908	0.000103	1	1	-0.50973	0.014455	1	1	-0.391494	0.00291603	1	1
18	protein_coding	ENSG00000166974	MAPRE2	6	0	0	-1	16	8	0.219	0.229	1	0	0.406507	0.0878571	1	0	-0.818	0.068547	1	0	-0.290163	0.0549912	1	0	0.00307	0.968	1	0	-0.294336	0.00484663	1	1	0.823769	0.0154825	1	1	-0.398	0.00511	1	1	-0.765943	0.000625869	1	1	-0.815304	4.61091e-08	1	1
8	protein_coding	ENSG00000104738	MCM4	6	0	0	-16	15	8	1.11	0.000576	1	1	1.36739	0.0013905	1	1	1.57	0.002266	1	-1	0.0834681	0.555146	1	0	---	---	0	0	-0.0434549	0.552042	1	0	0.416997	0.111872	1	0	-0.579	0.000868	1	1	-0.483124	0.000131593	1	1	-1.11622	7.6288e-48	1	1
22	protein_coding	ENSG00000100297	MCM5	6	0	0	-15	15	8	0.885	0.0025	1	1	0.883293	0.0258415	1	1	1.08	0.005767	1	-1	-0.837544	7.47996e-12	1	1	---	---	0	0	0.0353599	0.715288	1	0	0.0487072	0.91355	1	0	-1.58	1.61e-05	1	1	-0.155774	0.487661	1	0	-0.888229	9.28971e-13	1	1
6	protein_coding	ENSG00000112559	MDFI	6	1	0	1	16	8	0.191	0.159	1	0	0.0578078	0.798116	1	0	0.0334	0.926217	1	0	-0.632874	1.28037e-09	1	1	-0.27	5.73e-05	1	1	-0.0737214	0.335548	1	0	3.70748	5.35188e-07	1	1	-0.398	0.0611	1	0	-0.267472	0.28721	1	0	-0.100216	0.543787	1	0
3	protein_coding	ENSG00000085276	MECOM	6	0	0	0	16	8	0.1	0.525	1	0	0.834751	0.0138397	1	1	0.631	0.120494	1	0	-1.37078	0.0196171	1	1	0.0119	0.908	1	0	-0.428607	0.00067719	1	1	-0.843357	0.102305	1	0	-0.658	0.00105	1	1	-1.03661	0.000164506	1	1	-0.938102	2.20092e-06	1	1
1	protein_coding	ENSG00000116688	MFN2	6	1	1	0	16	8	-0.0654	0.799	1	0	0.198354	0.288192	1	0	-0.375	0.181372	1	0	-0.162227	0.124937	1	0	-0.214	0.0119	1	1	-0.12044	0.105421	1	0	0.798395	0.00134553	1	1	-0.224	0.211	1	0	-0.187055	0.251849	1	0	-0.262826	0.000721977	1	1
20	protein_coding	ENSG00000125871	MGME1	6	0	0	-1	14	8	---	---	0	0	-0.756729	0.0170441	1	-1	0.304	0.337715	1	0	-0.123524	0.533043	1	0	-0.157	0.00915	1	1	-0.289763	0.00784365	1	1	0.733274	0.00250272	1	1	---	---	0	0	-0.750952	2.03943e-05	1	1	-0.464288	5.63885e-06	1	1
22	protein_coding	ENSG00000100139	MICALL1	6	0	1	10	16	8	-0.334	0.101	1	0	1.24863	0.0009365	1	1	0.851	0.018975	1	-1	-0.842168	1.43856e-14	1	1	0.197	0.00471	1	-1	-0.408295	0.00167637	1	1	0.481462	0.238428	1	0	-0.789	0.000398	1	1	-0.0656264	0.750705	1	0	0.0701037	0.507159	1	0
X	protein_coding	ENSG00000165175	MID1IP1	6	0	0	1	15	8	0.021	0.95	1	0	0.722018	0.0112828	1	1	-0.0536	0.899523	1	0	-1.08897	6.79334e-17	1	1	---	---	0	0	-0.883039	0.00013486	1	1	0.26699	0.650371	1	0	-0.216	0.0709	1	0	-0.0435074	0.889757	1	0	0.055756	0.774053	1	0
21	protein_coding	ENSG00000159055	MIS18A	6	0	0	-15	16	8	0.446	0.00868	1	1	-0.212964	0.372079	1	0	0.543	0.343252	1	0	-0.188932	0.476662	1	0	0.0335	0.599	1	0	-0.247759	0.035525	1	1	-0.557967	0.184251	1	0	-0.39	0.00596	1	1	-1.14019	3.66105e-05	1	1	-1.25977	5.46558e-12	1	1
11	protein_coding	ENSG00000196611	MMP1	6	0	0	-2	15	7	5.27	3.22e-06	1	1	4.8043	0.0004689	1	1	-2.2	0.042205	1	1	-2.70427	4.91817e-21	1	1	-0.184	0.00892	1	1	0.79187	0.0002257	1	-1	-3.80482	1.40441e-30	1	-1	-0.00163	0.993	1	0	0.295547	0.850144	1	0	0.33391	0.703141	1	0
18	protein_coding	ENSG00000075643	MOCOS	6	0	0	-1	15	7	-0.84	0.000332	1	-1	0.282541	0.140383	1	0	0.282	0.227232	1	0	0.74724	0.0066802	1	-1	-0.169	0.0332	1	1	-0.21765	0.0199441	1	1	2.29617	1.70845e-08	1	1	-0.855	0.000261	1	1	-0.156655	0.440582	1	0	-0.240475	0.023356	1	1
12	protein_coding	ENSG00000051825	MPHOSPH9	6	1	1	-15	16	8	-0.252	0.0742	1	0	-1.70104	0.0007959	1	-1	-1.19	0.008096	1	1	-1.67844	3.65652e-14	1	1	0.117	0.714	1	0	-0.0285823	0.655541	1	0	-0.0929674	0.890847	1	0	-0.483	0.00346	1	1	-0.968826	1.54627e-05	1	1	-0.805896	4.16522e-07	1	1
20	protein_coding	ENSG00000101189	MRGBP	6	0	0	-6	15	8	0.0316	0.854	1	0	-1.54591	0.0004939	1	-1	-1.13	0.004673	1	1	-0.719814	1.40975e-07	1	1	---	---	0	0	-0.247739	0.00544533	1	1	-0.0244526	0.959018	1	0	-0.783	0.000411	1	1	-0.367856	0.0774989	1	0	-0.305845	0.016795	1	1
2	protein_coding	ENSG00000095002	MSH2	6	0	0	-15	16	8	0.866	0.000995	1	1	1.90135	0.0028836	1	1	1.88	0.008175	1	-1	0.271528	0.122742	1	0	-0.214	0.0245	1	1	0.0621458	0.465888	1	0	0.303119	0.342082	1	0	-0.486	0.00192	1	1	-0.51949	0.00199192	1	1	-0.8013	3.35777e-13	1	1
2	protein_coding	ENSG00000116062	MSH6	6	0	0	-16	16	8	0.239	0.0322	1	1	2.17469	0.0004582	1	1	0.892	0.008101	1	-1	-0.256969	0.0315111	1	1	-0.563	0.00341	1	1	-0.0968241	0.129951	1	0	-0.0787683	0.848608	1	0	-0.651	0.000915	1	1	-0.218574	0.230594	1	0	-0.465892	3.50632e-06	1	1
11	protein_coding	ENSG00000149480	MTA2	6	1	1	4	16	8	-0.33	0.0216	1	-1	0.461053	0.0482623	1	1	0.428	0.104902	1	0	-0.291598	0.00974706	1	1	-0.0903	0.219	1	0	-0.204751	0.0125231	1	1	0.151953	0.734853	1	0	0.0894	0.498	1	0	-0.157906	0.31001	1	0	-0.0197575	0.831955	1	0
8	protein_coding	ENSG00000172167	MTBP	6	0	0	-12	14	8	---	---	0	0	-0.0649848	0.800664	1	0	0.155	0.495585	1	0	-0.406588	0.310437	1	0	-0.208	0.00791	1	1	0.0598905	0.65002	1	0	0.242411	0.690489	1	0	---	---	0	0	-1.17433	4.19844e-07	1	1	-1.31226	6.47045e-20	1	1
X	protein_coding	ENSG00000063601	MTMR1	6	1	1	3	16	8	-0.0906	0.552	1	0	0.487048	0.0377478	1	1	-0.442	0.070564	1	0	-1.23194	5.82444e-28	1	1	-0.0412	0.676	1	0	-0.324983	0.00317102	1	1	0.385048	0.185632	1	0	-0.734	0.000428	1	1	-0.174585	0.467326	1	0	-0.128756	0.399119	1	0
8	protein_coding	ENSG00000170873	MTSS1	6	0	1	-3	16	8	1.17	0.00183	1	1	0.385239	0.0563211	1	0	-2.12	0.00786	1	1	-0.960001	1.15449e-14	1	1	0.0413	0.384	1	0	-0.062879	0.620919	1	0	-0.382226	0.695933	1	0	0.238	0.0547	1	0	0.241006	0.214399	1	0	-0.0553721	0.735757	1	0
16	protein_coding	ENSG00000167508	MVD	6	0	0	-2	15	8	0.838	0.000704	1	1	0.610333	0.0581678	1	0	-0.547	0.036037	1	1	-1.17868	3.19563e-24	1	1	---	---	0	0	-0.679117	0.00094671	1	1	-0.798411	0.0148647	1	-1	-0.458	0.00298	1	1	-0.0369053	0.884126	1	0	0.0596257	0.597138	1	0
17	protein_coding	ENSG00000132382	MYBBP1A	6	1	0	-6	15	8	-0.375	0.0527	1	0	0.511378	0.0315979	1	1	0.813	0.017848	1	-1	-0.726588	9.12593e-11	1	1	---	---	0	0	0.010986	0.892344	1	0	0.418948	0.148566	1	0	-0.292	0.0277	1	1	0.0733868	0.734103	1	0	-0.0851989	0.425783	1	0
8	protein_coding	ENSG00000136997	MYC	6	0	1	-6	16	8	-0.371	0.00663	1	-1	0.477516	0.038404	1	1	-1.53	0.00236	1	1	-1.65499	1.43649e-05	1	1	-0.448	0.00196	1	1	-0.25256	0.00354672	1	1	0.549608	0.263051	1	0	-0.512	0.0022	1	1	0.357687	0.0203025	1	-1	0.433738	4.30526e-09	1	-1
17	protein_coding	ENSG00000133026	MYH10	6	0	0	-5	15	8	-0.0552	0.904	1	0	-0.391097	0.141447	1	0	-1.45	0.039724	1	1	-1.37033	7.18896e-40	1	1	---	---	0	0	0.102537	0.17843	1	0	-0.530224	0.240585	1	0	-0.154	0.304	1	0	-0.374116	0.013849	1	1	-0.342928	7.45149e-05	1	1
19	protein_coding	ENSG00000099331	MYO9B	6	0	0	2	16	8	0.245	0.0493	1	1	0.578366	0.0728273	1	0	0.285	0.426599	1	0	-0.372516	0.000193664	1	1	0.0395	0.728	1	0	0.0044153	0.949753	1	0	0.564037	0.0220781	1	1	-0.26	0.0431	1	1	0.0694512	0.763996	1	0	0.0211612	0.87527	1	0
16	protein_coding	ENSG00000159593	NAE1	6	1	0	-4	16	8	-0.303	0.0195	1	-1	1.02473	0.0032341	1	1	0.441	0.092104	1	0	-0.790608	9.98473e-09	1	1	-0.0382	0.729	1	0	-0.0456865	0.528421	1	0	-0.202209	0.559412	1	0	-0.302	0.0222	1	1	-0.631594	0.00170684	1	1	-0.466554	3.42768e-07	1	1
7	protein_coding	ENSG00000146918	NCAPG2	6	0	0	-16	16	8	0.753	0.00112	1	1	0.031523	0.954272	1	0	-0.149	0.820373	1	0	-1.58579	1.07055e-22	1	1	-0.117	0.326	1	0	0.478805	0.00089127	1	-1	-0.761496	0.0756096	1	0	-1.24	1.85e-05	1	1	-1.81806	2.40726e-33	1	1	-1.84754	7.64761e-101	1	1
2	protein_coding	ENSG00000121152	NCAPH	6	0	0	-18	16	8	0.513	0.0212	1	1	-0.212812	0.504981	1	0	-0.29	0.463019	1	0	-2.27964	2.24547e-37	1	1	-0.152	0.0185	1	1	0.319019	0.00207699	1	-1	-0.551238	0.307363	1	0	-1.16	5.02e-05	1	1	-1.84387	3.19544e-23	1	1	-2.15305	1.08109e-44	1	1
11	protein_coding	ENSG00000188211	NCR3LG1	6	0	0	0	11	8	---	---	0	0	---	---	0	0	---	---	0	0	-4.13055	2.54884e-131	1	1	---	---	0	0	-0.0806955	0.322718	1	0	2.37267	1.08216e-08	1	1	---	---	0	0	-0.448384	0.229388	1	0	-0.755611	0.00021445	1	1
4	protein_coding	ENSG00000109320	NFKB1	6	1	1	0	16	8	0.14	0.672	1	0	1.14653	0.0092843	1	1	-0.216	0.62741	1	0	-0.438031	0.00402728	1	1	-0.201	0.0506	1	0	-0.196154	0.0285136	1	1	1.07718	1.77803e-06	1	1	-0.086	0.58	1	0	0.160322	0.408672	1	0	0.0649866	0.582377	1	0
16	protein_coding	ENSG00000132603	NIP7	6	0	0	-5	16	8	-0.674	0.00864	1	-1	1.34085	0.0028228	1	1	1.16	0.012828	1	-1	0.046153	0.86677	1	0	-0.303	0.00128	1	1	-0.326517	0.00133789	1	1	-0.324675	0.352837	1	0	0.164	0.363	1	0	-0.531524	0.00109544	1	1	-0.426795	6.81987e-05	1	1
17	protein_coding	ENSG00000073536	NLE1	6	0	0	-6	16	8	-0.491	0.024	1	-1	-0.489106	0.0306934	1	-1	0.0517	0.873829	1	0	-0.997204	1.5076e-07	1	1	0.306	0.481	1	0	-0.247816	0.0486192	1	1	0.914052	0.00370711	1	1	-0.497	0.00334	1	1	0.0289111	0.936003	1	0	0.0962424	0.660158	1	0
17	protein_coding	ENSG00000091592	NLRP1	6	1	1	6	16	8	0.696	0.0016	1	1	2.33003	0.0002625	1	1	-1.33	0.005487	1	1	-1.24047	6.9059e-22	1	1	-0.0365	0.633	1	0	0.382072	0.00109117	1	-1	1.00188	3.3019e-05	1	1	-0.555	0.00131	1	1	1.04235	4.17436e-05	1	-1	0.71617	1.48522e-06	1	-1
2	protein_coding	ENSG00000115761	NOL10	6	0	0	-8	16	8	-0.229	0.228	1	0	-0.129291	0.519482	1	0	-0.174	0.51563	1	0	0.0582648	0.786238	1	0	-0.262	0.00765	1	1	-0.266906	0.00946679	1	1	-0.279624	0.408344	1	0	0.0234	0.882	1	0	-0.606966	0.00348351	1	1	-0.480658	1.16107e-05	1	1
19	protein_coding	ENSG00000184162	NR2C2AP	6	0	0	-9	14	8	---	---	0	0	-0.232053	0.211105	1	0	0.153	0.50594	1	0	-0.227359	0.352784	1	0	-0.252	0.0158	1	1	-0.415721	0.00119781	1	1	1.13887	0.00211182	1	1	---	---	0	0	-0.429487	0.116554	1	0	-0.352533	0.0691563	1	0
4	protein_coding	ENSG00000109685	NSD2	6	0	1	-19	16	8	-0.189	0.113	1	0	0.698563	0.009409	1	1	0.505	0.216176	1	0	-1.19042	2.47289e-28	1	1	-0.129	0.00577	1	1	0.500021	0.00091738	1	-1	-0.133112	0.770451	1	0	-1.19	2.16e-05	1	1	-1.02488	1.1524e-14	1	1	-1.3612	1.28492e-61	1	1
10	protein_coding	ENSG00000107672	NSMCE4A	6	0	0	-9	15	8	0.102	0.52	1	0	1.6155	0.0013458	1	1	0.686	0.01856	1	-1	0.249855	0.242849	1	0	---	---	0	0	-0.173833	0.0389711	1	1	-0.212164	0.648743	1	0	-0.246	0.0436	1	1	-0.266339	0.338678	1	0	-0.753102	4.8927e-06	1	1
1	protein_coding	ENSG00000090273	NUDC	6	0	1	-6	16	8	-0.57	0.0941	1	0	1.08174	0.0014242	1	1	0.994	0.009908	1	-1	-0.321644	0.0149202	1	1	-0.0538	0.548	1	0	-0.0270604	0.805231	1	0	-0.183616	0.59856	1	0	-0.501	0.00211	1	1	-0.26118	0.143598	1	0	-0.436093	7.3397e-06	1	1
6	protein_coding	ENSG00000124789	NUP153	6	0	0	-9	16	8	0.303	0.169	1	0	0.00047167	0.99843	1	0	0.0597	0.834109	1	0	-0.411445	0.000141011	1	1	-0.214	0.249	1	0	0.0633339	0.310761	1	0	0.497369	0.089676	1	0	-0.215	0.0822	1	0	-0.586997	7.62094e-05	1	1	-0.799337	3.14939e-17	1	1
12	protein_coding	ENSG00000075188	NUP37	6	0	0	-4	16	8	0.162	0.195	1	0	0.742843	0.03837	1	1	0.361	0.128067	1	0	0.0831296	0.717353	1	0	-0.103	0.0972	1	0	-0.0663904	0.327058	1	0	-0.28509	0.556371	1	0	-0.59	0.000759	1	1	-0.694331	0.000776274	1	1	-0.641308	3.73971e-06	1	1
22	protein_coding	ENSG00000093000	NUP50	6	0	0	-14	16	8	-0.314	0.143	1	0	-0.214621	0.248223	1	0	0.582	0.030165	1	-1	-0.229542	0.0296695	1	1	0.0884	0.315	1	0	-0.172406	0.0411936	1	1	-0.0649949	0.882999	1	0	0.306	0.0836	1	0	-0.922568	8.99938e-11	1	1	-1.07599	5.61778e-29	1	1
17	protein_coding	ENSG00000167693	NXN	6	1	1	2	16	8	0.398	0.0997	1	0	-0.828238	0.0038672	1	-1	-0.286	0.291409	1	0	-0.96138	2.74392e-24	1	1	0.0851	0.508	1	0	-0.450248	0.00080545	1	1	-0.143358	0.66803	1	0	-0.524	0.00138	1	1	-0.029204	0.936472	1	0	-0.116622	0.557164	1	0
9	protein_coding	ENSG00000136811	ODF2	6	0	0	-7	16	8	-0.108	0.566	1	0	-0.285656	0.39391	1	0	-0.331	0.219698	1	0	-1.08339	8.87026e-15	1	1	0.00667	0.967	1	0	-0.0289882	0.681873	1	0	-0.0528173	0.917564	1	0	-0.566	0.00142	1	1	-0.513806	0.00533502	1	1	-0.531141	4.78186e-06	1	1
16	protein_coding	ENSG00000091651	ORC6	6	1	0	-10	15	8	0.456	0.0119	1	1	-0.0539929	0.880238	1	0	0.49	0.230768	1	0	-1.04284	1.71756e-06	1	1	---	---	0	0	0.571148	0.0006229	1	-1	0.121588	0.765317	1	0	-0.532	0.00932	1	1	-1.12909	6.54114e-08	1	1	-1.88909	1.97886e-35	1	1
11	protein_coding	ENSG00000175591	P2RY2	6	0	0	2	15	7	0.332	0.0396	1	1	1.03058	0.0817105	1	0	-0.101	0.901139	1	0	1.43012	4.13946e-33	1	-1	0.0726	0.5	1	0	0.181074	0.0354688	1	-1	2.32074	0.00712969	1	1	-0.746	0.00102	1	1	-1.02545	0.00219157	1	1	-0.787728	0.0022629	1	1
16	protein_coding	ENSG00000083093	PALB2	6	0	0	-5	16	8	0.0818	0.549	1	0	0.710358	0.0271163	1	1	0.464	0.167155	1	0	0.245911	0.132944	1	0	-0.0341	0.551	1	0	-0.360583	0.00143003	1	1	0.44028	0.182023	1	0	0.0524	0.774	1	0	-0.542577	0.0143655	1	1	-0.470191	0.00235349	1	1
18	protein_coding	ENSG00000178184	PARD6G	6	1	1	12	13	7	---	---	0	0	0.54003	0.10636	1	0	-0.948	0.048868	1	1	-1.33211	5.30243e-17	1	1	0.0589	0.77	1	0	-0.291554	0.00531247	1	1	-0.362149	0.545527	1	0	---	---	0	0	-0.255328	0.358036	1	0	0.115197	0.559847	1	0
14	protein_coding	ENSG00000129484	PARP2	6	0	0	-18	16	8	-0.162	0.517	1	0	-0.461491	0.0591878	1	0	0.51	0.054341	1	0	-0.165619	0.516709	1	0	-0.162	0.0188	1	1	-0.080415	0.268218	1	0	0.912088	0.0068818	1	1	-0.582	0.00084	1	1	-0.382672	0.109622	1	0	-0.882699	4.83742e-09	1	1
10	protein_coding	ENSG00000156374	PCGF6	6	0	0	-8	11	7	---	---	0	0	---	---	0	0	---	---	0	0	0.259407	0.387973	1	0	-0.0529	0.275	1	0	-0.337729	0.00446966	1	1	-0.704098	0.0512067	1	0	---	---	0	0	-0.736664	0.0285254	1	1	-0.935383	0.000246758	1	1
20	protein_coding	ENSG00000132646	PCNA	6	1	1	5	16	8	1	0.00253	1	1	1.40543	0.0015145	1	1	2	0.002006	1	-1	-0.213348	0.102776	1	0	-0.412	0.096	1	0	-0.0376589	0.545216	1	0	-0.600473	0.113628	1	0	-0.349	0.0376	1	1	-0.763901	1.04837e-09	1	1	-0.841668	7.35756e-40	1	1
1	protein_coding	ENSG00000162493	PDPN	6	1	1	-2	14	6	0.295	0.0197	1	1	1.92167	0.0004558	1	1	-1.37	0.007817	1	1	-1.79407	2.23374e-27	1	1	-0.0491	0.326	1	0	0.105779	0.111535	1	0	6.66625	0.000287142	1	1	-0.764	0.00211	1	1	0.578372	5.14033e-05	1	-1	0.529803	3.61068e-08	1	-1
10	protein_coding	ENSG00000148459	PDSS1	6	0	0	-12	16	8	-0.317	0.0775	1	0	1.14081	0.0024015	1	1	1.06	0.011105	1	-1	0.175031	0.68076	1	0	-0.0541	0.263	1	0	0.0458138	0.473761	1	0	0.218719	0.764702	1	0	-0.116	0.389	1	0	-0.112359	0.738448	1	0	-0.374274	0.0421536	1	1
4	protein_coding	ENSG00000038210	PI4K2B	6	1	1	1	14	8	---	---	0	0	-0.539383	0.0217397	1	-1	-0.0844	0.743391	1	0	0.101595	0.637918	1	0	-0.0162	0.832	1	0	-0.547257	0.00109923	1	1	-0.257101	0.43352	1	0	---	---	0	0	-0.907222	3.37393e-05	1	1	-0.550827	1.71679e-06	1	1
8	protein_coding	ENSG00000254093	PINX1	6	1	0	-2	14	8	---	---	0	0	0.875773	0.0266771	1	1	-0.108	0.81627	1	0	-1.13099	1.16417e-06	1	1	-0.155	0.011	1	1	-0.0810156	0.222376	1	0	-0.185116	0.823312	1	0	---	---	0	0	0.0249848	0.96874	1	0	-0.0198664	0.966056	1	0
17	protein_coding	ENSG00000154217	PITPNC1	6	0	0	9	16	8	-0.182	0.2	1	0	-1.30849	0.0086155	1	-1	-2.45	0.00474	1	1	-2.69159	2.98916e-94	1	1	0.00135	0.985	1	0	-0.366238	0.00253605	1	1	1.51853	2.80466e-07	1	1	-0.395	0.00758	1	1	-0.541403	0.0199768	1	1	-0.534132	0.00051814	1	1
1	protein_coding	ENSG00000081277	PKP1	6	1	1	2	15	7	0.0329	0.838	1	0	1.64126	0.0007843	1	1	-0.757	0.019886	1	1	-0.634862	7.28896e-11	1	1	-0.125	0.0047	1	1	-0.351328	0.00158	1	1	3.06865	4.93982e-09	1	1	-0.129	0.375	1	0	2.11481	8.89801e-05	1	-1	2.16201	2.66014e-07	1	-1
1	protein_coding	ENSG00000116711	PLA2G4A	6	1	0	-2	14	7	1.26	0.00297	1	1	-0.430992	0.128657	1	0	-0.947	0.011454	1	1	-0.924871	2.39373e-10	1	1	---	---	0	0	0.859855	0.00031218	1	-1	0.316921	0.653333	1	0	-0.355	0.189	1	0	-0.251438	0.385584	1	0	-0.0303855	0.901224	1	0
6	protein_coding	ENSG00000118495	PLAGL1	6	0	1	-1	15	8	-0.197	0.555	1	0	-1.96281	0.0003503	1	-1	-0.975	0.034113	1	1	-0.881659	2.27183e-06	1	1	---	---	0	0	0.0388605	0.618671	1	0	1.16669	4.22319e-07	1	1	-0.451	0.00845	1	1	0.119197	0.670076	1	0	-0.132557	0.42803	1	0
16	protein_coding	ENSG00000166851	PLK1	6	0	0	-20	16	8	-0.0684	0.741	1	0	0.187291	0.711868	1	0	-0.811	0.097328	1	0	-2.66782	6.51534e-63	1	1	-0.131	0.356	1	0	0.13964	0.06047	1	0	-2.29416	0.0889959	1	0	-1.9	1.11e-05	1	1	-2.02646	8.91723e-46	1	1	-2.56756	4.05136e-117	1	1
4	protein_coding	ENSG00000142731	PLK4	6	0	0	-17	16	8	0.559	0.00656	1	1	-0.57256	0.0199728	1	-1	-0.483	0.065977	1	0	-1.15711	1.37738e-09	1	1	-0.0725	0.654	1	0	0.24475	0.00473022	1	-1	-0.251084	0.622799	1	0	-0.908	9.88e-05	1	1	-1.66144	4.36732e-18	1	1	-2.24759	1.9391e-53	1	1
20	protein_coding	ENSG00000100979	PLTP	6	0	0	7	15	7	0.0132	0.944	1	0	0.657515	0.0240058	1	1	-1.98	0.003258	1	1	-2.46205	7.27804e-90	1	1	-0.354	0.000135	1	1	0.777415	0.00035986	1	-1	0.812676	0.188419	1	0	0.23	0.097	1	0	---	---	0	0	0.0999711	0.946502	1	0
1	protein_coding	ENSG00000076356	PLXNA2	6	1	1	6	15	8	-0.176	0.482	1	0	1.12695	0.0013064	1	1	0.995	0.007939	1	-1	-1.02453	3.89315e-21	1	1	---	---	0	0	0.192958	0.0256425	1	-1	0.219816	0.533583	1	0	-1.01	8.42e-05	1	1	-0.289751	0.0872214	1	0	-0.200281	0.0191564	1	1
11	protein_coding	ENSG00000014138	POLA2	6	1	1	-13	16	8	0.579	0.0038	1	1	0.599945	0.0420478	1	1	0.621	0.064257	1	0	-0.300549	0.190342	1	0	-0.169	0.17	1	0	0.280866	0.00254073	1	-1	0.554449	0.0619529	1	0	-0.636	0.00103	1	1	-0.80114	6.93055e-06	1	1	-1.29377	6.75822e-23	1	1
12	protein_coding	ENSG00000177084	POLE	6	0	0	-11	16	8	0.262	0.11	1	0	0.491099	0.0586654	1	0	0.704	0.031221	1	-1	-0.309179	0.0242602	1	1	0.0538	0.269	1	0	0.208247	0.0471546	1	-1	0.185795	0.585626	1	0	-0.505	0.00161	1	1	-0.453536	0.00815824	1	1	-0.998194	1.28293e-22	1	1
14	protein_coding	ENSG00000100479	POLE2	6	0	0	-14	16	8	1.27	0.000456	1	1	0.281376	0.317581	1	0	1.32	0.006206	1	-1	-0.261988	0.581646	1	0	-0.153	0.0423	1	1	0.167314	0.0536629	1	0	0.0156846	0.986765	1	0	-0.996	0.000151	1	1	-0.799306	0.012332	1	1	-1.5573	1.22963e-10	1	1
6	protein_coding	ENSG00000170734	POLH	6	0	0	20	16	8	0.15	0.412	1	0	0.958024	0.0064797	1	1	0.422	0.148175	1	0	-0.570043	3.97128e-05	1	1	0.0376	0.599	1	0	0.0622504	0.453013	1	0	1.20206	1.13946e-07	1	1	0.0079	0.961	1	0	-0.82714	0.000269369	1	1	-0.542539	6.97939e-08	1	1
5	protein_coding	ENSG00000113356	POLR3G	6	0	0	-11	15	8	-0.175	0.365	1	0	1.1447	0.001535	1	1	0.837	0.01856	1	-1	-0.750025	0.000527501	1	1	---	---	0	0	0.18343	0.150802	1	0	-0.768175	0.305082	1	0	-0.579	0.00671	1	1	-0.537033	0.00327364	1	1	-0.401559	0.000800912	1	1
7	protein_coding	ENSG00000196313	POM121	6	0	0	2	16	8	-0.0951	0.481	1	0	0.289246	0.321217	1	0	-0.0228	0.958606	1	0	-0.346832	0.0208165	1	1	0.0496	0.592	1	0	-0.40061	0.0194493	1	1	0.992806	2.85356e-05	1	1	-0.15	0.218	1	0	-0.537778	0.00252434	1	1	-0.405169	0.000650104	1	1
2	protein_coding	ENSG00000213639	PPP1CB	6	0	1	0	16	8	-0.174	0.444	1	0	-2.63042	0.0002625	1	-1	-0.964	0.035865	1	1	-0.453922	6.21433e-07	1	1	0.188	0.0596	1	0	-0.266697	0.0047476	1	1	-0.48268	0.0509619	1	0	-0.103	0.479	1	0	-0.462517	0.0016856	1	1	-0.340199	2.37082e-07	1	1
12	protein_coding	ENSG00000186298	PPP1CC	6	0	0	-4	15	8	-0.019	0.954	1	0	-0.245971	0.418673	1	0	-0.736	0.069859	1	0	-1.30421	5.19961e-37	1	1	---	---	0	0	-0.323755	0.00254073	1	1	-0.263103	0.373822	1	0	-0.25	0.063	1	0	-0.361426	0.00785465	1	1	-0.41581	3.20187e-09	1	1
5	protein_coding	ENSG00000156475	PPP2R2B	6	1	0	2	14	7	0.411	0.00831	1	1	-3.48261	0.0001544	1	-1	-3.2	0.001595	1	1	-5.47303	4.78554e-41	1	1	---	---	0	0	-0.790027	0.00018339	1	1	3.78735	2.27983e-05	1	1	0.0518	0.705	1	0	-1.73212	0.0764147	1	0	-1.36026	0.0234105	1	1
6	protein_coding	ENSG00000112640	PPP2R5D	6	0	0	-1	16	8	0.176	0.243	1	0	0.524753	0.0270661	1	1	-0.496	0.059423	1	0	-0.215428	0.193915	1	0	0.0968	0.072	1	0	-0.288663	0.00888065	1	1	0.0821814	0.872289	1	0	-0.527	0.00139	1	1	-0.266548	0.208225	1	0	-0.345704	0.00850388	1	1
14	protein_coding	ENSG00000100796	PPP4R3A	6	1	1	6	15	8	-0.241	0.11	1	0	1.13437	0.0063501	1	1	-0.393	0.162372	1	0	-0.416159	6.11239e-05	1	1	---	---	0	0	-0.169482	0.0391128	1	1	0.458477	0.0735472	1	0	-0.0743	0.597	1	0	-0.391307	0.0352602	1	1	-0.112817	0.253043	1	0
10	protein_coding	ENSG00000148840	PPRC1	6	0	0	-11	16	8	-0.0968	0.631	1	0	0.623327	0.0155229	1	1	0.4	0.106155	1	0	-0.684346	0.0906827	1	0	-0.154	0.214	1	0	0.012783	0.888742	1	0	0.197064	0.567493	1	0	-0.455	0.00461	1	1	-0.0640214	0.783029	1	0	0.0298825	0.859974	1	0
X	protein_coding	ENSG00000012211	PRICKLE3	6	1	0	3	16	8	0.033	0.872	1	0	0.269465	0.229664	1	0	-0.91	0.016295	1	1	-0.659434	0.000353048	1	1	0.0716	0.284	1	0	-0.120048	0.12504	1	0	0.626765	0.127168	1	0	-0.492	0.00326	1	1	0.375526	0.292967	1	0	0.307987	0.233078	1	0
6	protein_coding	ENSG00000146143	PRIM2	6	0	0	-10	16	8	0.337	0.0175	1	1	0.376905	0.0737886	1	0	-0.12	0.661212	1	0	-0.332229	0.131643	1	0	0.00165	0.989	1	0	-0.11814	0.12478	1	0	-0.59167	0.143021	1	0	-0.459	0.0269	1	1	-0.764385	0.00559049	1	1	-0.936596	1.17805e-06	1	1
11	protein_coding	ENSG00000185238	PRMT3	6	0	0	-3	15	8	-0.6	0.0497	1	-1	0.430035	0.0458955	1	1	0.512	0.060516	1	0	-0.914819	2.31996e-06	1	1	---	---	0	0	-0.350154	0.00400999	1	1	-0.150969	0.781866	1	0	-0.241	0.119	1	0	-0.315909	0.0739797	1	0	-0.107328	0.302193	1	0
14	protein_coding	ENSG00000100462	PRMT5	6	0	1	-3	16	8	-0.403	0.1	1	0	1.45721	0.0036718	1	1	0.481	0.089312	1	0	-1.39671	2.14865e-40	1	1	-0.404	0.000935	1	1	-0.0895836	0.173201	1	0	0.153892	0.654574	1	0	-0.226	0.0869	1	0	-0.293329	0.0645052	1	0	-0.333802	0.000157539	1	1
11	protein_coding	ENSG00000135378	PRRG4	6	1	0	5	16	8	0.221	0.147	1	0	0.646153	0.0122218	1	1	-1.42	0.004873	1	1	-1.06578	2.02338e-26	1	1	0.0905	0.403	1	0	0.0318344	0.654155	1	0	4.41269	6.40084e-19	1	1	0.0407	0.797	1	0	-0.108899	0.737673	1	0	-0.121912	0.39699	1	0
17	protein_coding	ENSG00000108671	PSMD11	6	0	0	-2	16	8	0.507	0.0024	1	1	2.40077	0.0001933	1	1	1.25	0.008394	1	-1	-0.257815	0.0196883	1	1	-0.118	0.195	1	0	-0.015009	0.813023	1	0	-0.262553	0.411198	1	0	-0.185	0.145	1	0	-0.521813	5.79481e-05	1	1	-0.605301	2.88407e-18	1	1
3	protein_coding	ENSG00000175166	PSMD2	6	0	0	0	16	8	-0.085	0.74	1	0	1.08974	0.0018087	1	1	0.469	0.071697	1	0	-0.812052	4.36418e-20	1	1	-0.321	0.00123	1	1	0.0340428	0.610118	1	0	0.0281816	0.959804	1	0	-0.179	0.144	1	0	-0.586611	4.00975e-07	1	1	-0.605827	1.32454e-24	1	1
17	protein_coding	ENSG00000108344	PSMD3	6	1	0	-3	16	8	-0.149	0.467	1	0	0.76125	0.0063449	1	1	0.488	0.068133	1	0	-0.488689	3.00759e-06	1	1	-0.279	0.0106	1	1	-0.0046029	0.948327	1	0	-0.311015	0.290019	1	0	-0.415	0.00986	1	1	-0.141428	0.463986	1	0	-0.349917	6.01813e-06	1	1
21	protein_coding	ENSG00000183527	PSMG1	6	0	0	-10	16	8	-0.544	0.00414	1	-1	0.218271	0.491955	1	0	0.667	0.205637	1	0	-0.238967	0.313724	1	0	-0.214	0.00635	1	1	-0.270149	0.0186691	1	1	-0.608918	0.12016	1	0	-0.665	0.000538	1	1	-0.236446	0.318928	1	0	-0.208512	0.0985386	1	0
20	protein_coding	ENSG00000196396	PTPN1	6	0	1	2	16	8	0.844	0.00315	1	1	-0.266485	0.21632	1	0	-1.32	0.006694	1	1	-1.28172	4.56383e-24	1	1	0.13	0.198	1	0	0.0333898	0.584638	1	0	0.401088	0.164665	1	0	0.408	0.00499	1	-1	-0.62241	1.11014e-06	1	1	-0.624209	5.42337e-21	1	1
12	protein_coding	ENSG00000179295	PTPN11	6	0	0	-3	16	8	-0.425	0.0088	1	-1	-0.641682	0.0279402	1	-1	-2.49	0.034272	1	1	-1.00116	3.04099e-27	1	1	-0.0453	0.577	1	0	-0.238533	0.0136065	1	1	-0.105843	0.781355	1	0	-0.413	0.0043	1	1	-0.608079	0.000237706	1	1	-0.448942	1.64863e-11	1	1
10	protein_coding	ENSG00000132334	PTPRE	6	1	1	9	16	8	0.493	0.00847	1	1	1.25701	0.0009963	1	1	0.138	0.558505	1	0	-2.56022	5.32459e-49	1	1	0.029	0.67	1	0	-0.0799256	0.39299	1	0	7.47038	1.28254e-14	1	1	-0.801	0.000208	1	1	0.119267	0.663901	1	0	-0.130561	0.399093	1	0
2	protein_coding	ENSG00000048991	R3HDM1	6	0	0	-5	16	8	-0.507	0.0128	1	-1	0.309029	0.127754	1	0	-0.136	0.677659	1	0	-1.40945	4.25095e-17	1	1	0.0276	0.689	1	0	-0.430733	0.00100921	1	1	-0.22507	0.655588	1	0	-0.351	0.0457	1	1	-0.221121	0.243598	1	0	-0.274516	0.011383	1	1
10	protein_coding	ENSG00000107560	RAB11FIP2	6	0	0	3	16	8	-0.431	0.0548	1	0	0.972536	0.0213731	1	1	0.945	0.009778	1	-1	0.618511	0.000426458	1	-1	-0.0497	0.771	1	0	-0.473206	0.00073127	1	1	0.572178	0.0368815	1	1	-0.338	0.027	1	1	-0.766254	0.00139346	1	1	-0.799146	6.53556e-08	1	1
7	protein_coding	ENSG00000136238	RAC1	6	1	1	-2	16	8	0.133	0.276	1	0	2.60039	0.0005519	1	1	-0.668	0.022012	1	1	-0.482321	4.73309e-07	1	1	0.0665	0.363	1	0	-0.175612	0.0181766	1	1	-0.204586	0.539448	1	0	-0.00582	0.976	1	0	-0.23944	0.0804155	1	0	-0.316216	3.11466e-07	1	1
12	protein_coding	ENSG00000161800	RACGAP1	6	0	1	-19	16	8	0.418	0.0718	1	0	-1.06746	0.0024741	1	-1	-0.508	0.067676	1	0	-0.924718	2.72763e-16	1	1	-0.692	2.99e-06	1	1	0.0867326	0.179421	1	0	-0.956512	0.0720052	1	0	-1.28	4.06e-05	1	1	-1.83818	3.04824e-36	1	1	-2	7.81443e-94	1	1
8	protein_coding	ENSG00000164754	RAD21	6	1	0	-15	16	8	0.118	0.622	1	0	1.46529	0.0171906	1	1	-1.57	0.107403	1	0	-0.284276	0.00557987	1	1	-0.0256	0.844	1	0	-0.117973	0.0733815	1	0	-0.248186	0.542939	1	0	-0.207	0.226	1	0	-0.928416	7.74873e-15	1	1	-0.937774	2.05017e-55	1	1
4	protein_coding	ENSG00000138698	RAP1GDS1	6	0	0	-9	16	8	-0.242	0.0758	1	0	2.20212	0.0011687	1	1	-0.419	0.10224	1	0	-0.511643	1.46473e-05	1	1	-0.0465	0.518	1	0	-0.451578	0.00104781	1	1	-0.113129	0.826598	1	0	-0.0633	0.632	1	0	-0.406721	0.00666471	1	1	-0.375051	1.15264e-05	1	1
12	protein_coding	ENSG00000079337	RAPGEF3	6	1	1	2	16	8	1.08	0.00115	1	1	0.957986	0.0197733	1	1	-0.417	0.306858	1	0	-2.04318	1.12776e-14	1	1	0.017	0.904	1	0	-0.12562	0.0832626	1	0	1.54726	3.73006e-06	1	1	-0.0588	0.674	1	0	-1.43499	0.00223279	1	1	-1.52419	1.19405e-05	1	1
20	protein_coding	ENSG00000089050	RBBP9	6	0	0	-4	16	8	-0.34	0.207	1	0	0.70601	0.0243013	1	1	0.608	0.10217	1	0	0.278403	0.0933175	1	0	-0.156	0.0151	1	1	-0.513301	0.00194636	1	1	-0.286231	0.617336	1	0	0.0639	0.657	1	0	-0.0458961	0.875357	1	0	-0.14931	0.259575	1	0
12	protein_coding	ENSG00000122965	RBM19	6	1	0	1	15	8	0.269	0.0555	1	0	0.734058	0.0173875	1	1	0.908	0.017409	1	-1	-0.985819	4.02801e-13	1	1	---	---	0	0	0.0312985	0.65712	1	0	0.660634	0.0101517	1	1	0.104	0.44	1	0	0.255962	0.321092	1	0	0.0840766	0.669705	1	0
1	protein_coding	ENSG00000180198	RCC1	6	0	1	-10	16	8	-0.0563	0.887	1	0	0.0865482	0.777001	1	0	-0.417	0.265869	1	0	-1.60171	7.56185e-44	1	1	-0.272	0.00321	1	1	-0.0305509	0.737549	1	0	-0.122223	0.777386	1	0	-0.214	0.107	1	0	-0.696628	6.6932e-06	1	1	-0.894872	1.06631e-21	1	1
16	protein_coding	ENSG00000168411	RFWD3	6	0	0	-13	16	8	0.522	0.00438	1	1	0.4996	0.0908479	1	0	0.164	0.716288	1	0	0.0564259	0.72704	1	0	-0.275	0.0103	1	1	0.0883001	0.16376	1	0	0.125939	0.760622	1	0	-0.415	0.0101	1	1	-0.560742	0.00100324	1	1	-1.00333	9.17078e-18	1	1
11	protein_coding	ENSG00000174791	RIN1	6	1	0	7	16	8	-0.22	0.302	1	0	-1.29911	0.0008164	1	-1	-1.16	0.006661	1	1	-0.823893	2.11457e-12	1	1	-0.0111	0.901	1	0	-0.28614	0.0423731	1	1	-0.330223	0.581002	1	0	-0.65	0.00069	1	1	0.0578891	0.816786	1	0	0.414969	2.85897e-06	1	-1
1	protein_coding	ENSG00000116514	RNF19B	6	1	0	15	16	8	0.683	0.00457	1	1	-0.6267	0.0119799	1	-1	-1.26	0.00686	1	1	-1.51446	2.22161e-48	1	1	-0.07	0.286	1	0	-0.370666	0.00236474	1	1	-0.0997495	0.906321	1	0	-0.481	0.00325	1	1	-0.0697825	0.819434	1	0	-0.0789204	0.623628	1	0
16	protein_coding	ENSG00000205937	RNPS1	6	0	0	-5	16	8	0.233	0.0362	1	1	0.497746	0.0371434	1	1	0.66	0.026759	1	-1	-0.412498	0.000545939	1	1	-0.237	0.0608	1	0	-0.391829	0.00235303	1	1	0.179839	0.6128	1	0	0.134	0.259	1	0	0.0360991	0.895028	1	0	-0.229091	0.0293102	1	1
3	protein_coding	ENSG00000174891	RSRC1	6	0	1	-9	16	8	0.213	0.138	1	0	1.32571	0.0032184	1	1	-0.61	0.456748	1	0	0.57285	0.0018083	1	-1	-0.155	0.00346	1	1	-0.46771	0.00054258	1	1	-0.721402	0.056984	1	0	0.164	0.211	1	0	-0.595873	0.00303616	1	1	-0.586459	7.53736e-06	1	1
2	protein_coding	ENSG00000136715	SAP130	6	0	0	-5	16	8	0.274	0.0384	1	1	-0.243571	0.209789	1	0	-0.119	0.703638	1	0	-0.31089	0.0300334	1	1	-0.0965	0.178	1	0	-0.19846	0.013451	1	1	0.0203778	0.966666	1	0	0.169	0.18	1	0	-0.193308	0.412184	1	0	-0.312118	0.0235606	1	1
X	protein_coding	ENSG00000130066	SAT1	6	0	1	14	15	8	0.266	0.0217	1	1	1.69057	0.0005594	1	1	-0.446	0.073288	1	0	-1.77616	5.80437e-83	1	1	---	---	0	0	-0.0536477	0.628603	1	0	1.46823	0.00225022	1	1	-0.894	0.000104	1	1	0.0289395	0.893038	1	0	0.0310685	0.761072	1	0
8	protein_coding	ENSG00000168077	SCARA3	6	0	1	-3	16	8	0.373	0.0145	1	1	-3.70073	0.0001169	1	-1	-2.58	0.002715	1	1	-0.633615	9.41433e-08	1	1	0.0523	0.59	1	0	-0.0710385	0.345402	1	0	-0.39671	0.543513	1	0	-0.471	0.00369	1	1	-1.14472	5.22702e-09	1	1	-1.33822	4.52321e-18	1	1
1	protein_coding	ENSG00000196189	SEMA4A	6	0	0	2	16	8	-0.00618	0.971	1	0	1.06559	0.0133588	1	1	-0.497	0.456083	1	0	0.300689	0.0944717	1	0	0.0138	0.836	1	0	-0.166805	0.0983547	1	0	2.6935	1.37729e-05	1	1	0.0995	0.423	1	0	0.423245	0.786005	1	0	0.272511	0.727741	1	0
15	protein_coding	ENSG00000185033	SEMA4B	6	1	1	1	13	8	---	---	0	0	0.439831	0.0374008	1	1	-1.36	0.003925	1	1	-1.06474	9.14398e-18	1	1	---	---	0	0	0.272744	0.0110489	1	-1	1.67837	1.10568e-11	1	1	---	---	0	0	0.0610351	0.836066	1	0	-0.270491	0.0205	1	1
5	protein_coding	ENSG00000164402	SEPT8	6	0	0	4	15	8	0.46	0.133	1	0	1.29888	0.0013905	1	1	-0.813	0.0248	1	1	0.00407592	0.983499	1	0	---	---	0	0	-0.119895	0.0892842	1	0	0.721179	0.00403651	1	1	0.0682	0.611	1	0	-0.491214	0.00321068	1	1	-0.579921	4.38537e-12	1	1
18	protein_coding	ENSG00000166401	SERPINB8	6	0	0	8	16	8	0.425	0.0976	1	0	0.893081	0.0218474	1	1	-0.82	0.072098	1	0	-1.07655	1.28414e-15	1	1	-0.0856	0.637	1	0	-0.210824	0.0329636	1	1	0.382188	0.146286	1	0	-0.195	0.139	1	0	-0.66933	1.32486e-05	1	1	-0.647093	8.12288e-13	1	1
18	protein_coding	ENSG00000154839	SKA1	6	0	0	-18	16	8	-0.274	0.229	1	0	-0.0548067	0.90322	1	0	-0.666	0.189574	1	0	-2.55142	5.34913e-26	1	1	-0.116	0.566	1	0	-0.162361	0.0808684	1	0	-0.32034	0.459378	1	0	-1.39	1.32e-05	1	1	-1.95309	1.49058e-26	1	1	-2.3082	3.07892e-59	1	1
13	protein_coding	ENSG00000165480	SKA3	6	0	0	-17	14	8	---	---	0	0	-0.295629	0.173985	1	0	-0.104	0.663355	1	0	-1.79458	2.29923e-16	1	1	-0.129	0.138	1	0	-0.271466	0.00995683	1	1	-0.406156	0.46116	1	0	---	---	0	0	-1.60053	2.90328e-15	1	1	-1.98902	1.36678e-60	1	1
12	protein_coding	ENSG00000072041	SLC6A15	6	0	0	-5	13	5	-0.551	0.0117	1	-1	1.72525	0.0063529	1	1	-1.05	0.016309	1	1	-2.70545	6.63301e-66	1	1	-0.0368	0.68	1	0	0.126124	0.146172	1	0	-0.932145	0.663867	1	0	-0.596	0.00104	1	1	-0.419176	0.0379838	1	1	-0.280748	0.00292447	1	1
8	protein_coding	ENSG00000003989	SLC7A2	6	0	0	-3	16	8	0.562	0.024	1	1	0.502729	0.0758546	1	0	-0.0251	0.944331	1	0	-4.46493	5.82559e-30	1	1	0.0227	0.773	1	0	0.144028	0.279715	1	0	5.44033	6.30995e-28	1	1	0.378	0.0286	1	-1	-0.938162	3.39798e-08	1	1	-0.931819	6.46538e-15	1	1
12	protein_coding	ENSG00000066117	SMARCD1	6	0	0	-1	16	8	-0.186	0.382	1	0	0.238561	0.209119	1	0	0.416	0.159761	1	0	-0.234327	0.0671252	1	0	0.0491	0.285	1	0	-0.101216	0.140469	1	0	0.375493	0.194263	1	0	-0.331	0.0148	1	1	-0.209229	0.249239	1	0	-0.263069	0.00930787	1	1
9	protein_coding	ENSG00000136824	SMC2	6	0	0	-13	16	8	0.786	0.0078	1	1	-1.43651	0.0009773	1	-1	-0.413	0.114052	1	0	-0.105174	0.55019	1	0	-0.136	0.242	1	0	0.056613	0.478581	1	0	-0.29565	0.458019	1	0	-1.12	4.06e-05	1	1	-1.35782	1.81564e-20	1	1	-1.5134	3.54345e-70	1	1
10	protein_coding	ENSG00000108055	SMC3	6	0	0	-13	16	8	-0.455	0.0189	1	-1	3.76644	5.89e-05	1	1	-0.975	0.200332	1	0	-0.166662	0.241444	1	0	-0.275	0.00712	1	1	-0.0235853	0.777422	1	0	-0.349736	0.217323	1	0	-0.492	0.00192	1	1	-0.644937	0.000242371	1	1	-0.676797	9.13932e-15	1	1
1	protein_coding	ENSG00000143499	SMYD2	6	1	1	-3	16	8	-0.315	0.0365	1	-1	-0.329524	0.399458	1	0	-0.299	0.504234	1	0	-0.410998	0.00269533	1	1	-0.101	0.276	1	0	-0.300932	0.018567	1	1	-0.0602288	0.914797	1	0	-0.508	0.00217	1	1	-0.155726	0.415639	1	0	-0.299814	0.000743576	1	1
1	protein_coding	ENSG00000060688	SNRNP40	6	0	0	-13	16	8	-0.304	0.144	1	0	0.919064	0.0081481	1	1	0.993	0.016688	1	-1	0.258438	0.083623	1	0	-0.181	0.0173	1	1	-0.208258	0.0315901	1	1	-0.455096	0.20619	1	0	-0.463	0.00419	1	1	-0.421081	0.0293692	1	1	-0.533734	2.57487e-05	1	1
18	protein_coding	ENSG00000167088	SNRPD1	6	0	0	-12	16	8	0.0331	0.824	1	0	0.681561	0.0082004	1	1	1.17	0.00422	1	-1	0.122367	0.53792	1	0	-0.125	0.295	1	0	-0.163724	0.104385	1	0	-0.446734	0.156936	1	0	-0.34	0.029	1	1	-0.856566	2.8023e-07	1	1	-0.567711	8.96155e-08	1	1
20	protein_coding	ENSG00000089006	SNX5	6	0	0	-2	16	8	-0.135	0.346	1	0	-0.56952	0.0511177	1	0	-0.738	0.015531	1	1	-0.50361	1.46394e-05	1	1	-0.344	0.0013	1	1	0.034705	0.563868	1	0	-0.211687	0.531642	1	0	-0.0576	0.675	1	0	-0.247946	0.114742	1	0	-0.30864	0.000126308	1	1
1	protein_coding	ENSG00000162627	SNX7	6	0	0	-1	16	8	0.0838	0.692	1	0	0.76392	0.0111479	1	1	0.778	0.020394	1	-1	0.377579	0.0365834	1	-1	0.142	0.104	1	0	-0.591807	0.00360274	1	1	-0.506282	0.182522	1	0	-0.446	0.00303	1	1	-0.586441	0.00206461	1	1	-0.25874	0.0205114	1	1
15	protein_coding	ENSG00000140263	SORD	6	0	0	-5	12	8	---	---	0	0	---	---	0	0	---	---	0	0	-2.04533	5.60014e-64	1	1	-0.214	0.00643	1	1	-0.158065	0.0260468	1	1	0.217032	0.726347	1	0	---	---	0	0	0.143883	0.528164	1	0	0.2331	0.0577874	1	0
17	protein_coding	ENSG00000129194	SOX15	6	1	0	-2	16	8	0.217	0.185	1	0	-0.367063	0.0767439	1	0	-1.08	0.005404	1	1	-1.19304	1.97645e-28	1	1	-0.0259	0.755	1	0	-0.348056	0.00125458	1	1	0.731963	0.432859	1	0	-0.434	0.00678	1	1	-0.540252	0.0135029	1	1	-0.30082	0.0812568	1	0
2	protein_coding	ENSG00000198369	SPRED2	6	1	1	-3	16	8	-0.227	0.266	1	0	-0.523143	0.0373334	1	-1	0.435	0.194766	1	0	-0.520912	0.00014464	1	1	-0.023	0.727	1	0	-0.278716	0.0038535	1	1	0.651273	0.0178384	1	1	-0.35	0.0116	1	1	-0.452197	0.033568	1	1	-0.364247	0.0110595	1	1
8	protein_coding	ENSG00000104549	SQLE	6	0	0	-10	16	8	1.26	0.000128	1	1	3.18848	0.0001254	1	1	-1.51	0.041241	1	1	-0.714382	1.94039e-10	1	1	-0.0241	0.734	1	0	-0.0149695	0.808207	1	0	-0.142543	0.700548	1	0	-0.175	0.156	1	0	-0.279912	0.127451	1	0	-0.0367377	0.668722	1	0
5	protein_coding	ENSG00000153006	SREK1IP1	6	0	0	-4	15	8	-0.0738	0.615	1	0	1.53192	0.0007748	1	1	0.88	0.012179	1	-1	-0.718288	7.57367e-11	1	1	---	---	0	0	-0.56094	0.00059615	1	1	-0.381094	0.193551	1	0	-0.348	0.0271	1	1	-0.316434	0.1536	1	0	-0.35661	0.00134954	1	1
17	protein_coding	ENSG00000161547	SRSF2	6	0	0	-8	15	8	0.26	0.0641	1	0	1.58169	0.0004548	1	1	1.33	0.00313	1	-1	0.0596975	0.741839	1	0	---	---	0	0	0.142884	0.0553379	1	0	-0.131309	0.705094	1	0	-0.153	0.196	1	0	-0.287562	0.0386888	1	1	-0.523099	7.94412e-14	1	1
12	protein_coding	ENSG00000084112	SSH1	6	1	1	-2	16	8	-0.361	0.206	1	0	-0.526062	0.0300868	1	-1	-0.857	0.018646	1	1	-1.8066	8.21896e-74	1	1	-0.0252	0.552	1	0	-0.240219	0.0402065	1	1	0.303522	0.278329	1	0	-0.275	0.0408	1	1	-0.179396	0.482677	1	0	-0.0598382	0.732095	1	0
X	protein_coding	ENSG00000101972	STAG2	6	0	0	-7	16	8	-0.101	0.35	1	0	-1.36422	0.0006664	1	-1	-1.44	0.002762	1	1	-0.965396	6.60745e-20	1	1	-0.0791	0.315	1	0	-0.272569	0.00781748	1	1	-0.0966107	0.815588	1	0	-0.247	0.197	1	0	-0.346113	0.0472321	1	1	-0.314234	0.000376732	1	1
5	protein_coding	ENSG00000164211	STARD4	6	0	0	6	14	8	---	---	0	0	-0.555606	0.0663787	1	0	-0.247	0.468499	1	0	0.138819	0.379973	1	0	0.0186	0.8	1	0	-0.557569	0.00176347	1	1	0.559618	0.0242575	1	1	---	---	0	0	-0.80681	5.81596e-06	1	1	-0.524597	1.00309e-11	1	1
1	protein_coding	ENSG00000123473	STIL	6	0	0	-20	16	8	0.514	0.116	1	0	-0.75813	0.0055746	1	-1	0.204	0.371981	1	0	-1.32442	1.21926e-13	1	1	-0.00733	0.964	1	0	0.0380478	0.553416	1	0	-0.053434	0.945634	1	0	-0.759	0.00059	1	1	-1.30974	1.51342e-14	1	1	-1.87344	1.25694e-42	1	1
11	protein_coding	ENSG00000168439	STIP1	6	0	0	-6	15	8	-0.501	0.352	1	0	2.09802	0.0002369	1	1	1.36	0.006715	1	-1	-0.421385	8.15384e-05	1	1	---	---	0	0	0.100556	0.1086	1	0	-0.212495	0.519496	1	0	-0.326	0.024	1	1	-0.373756	0.00624978	1	1	-0.39736	6.09342e-10	1	1
13	protein_coding	ENSG00000102572	STK24	6	1	1	-2	16	8	-0.402	0.0128	1	-1	0.668234	0.014402	1	1	-0.841	0.020211	1	1	-1.88719	6.23308e-92	1	1	-0.183	0.0836	1	0	-0.406973	0.00129249	1	1	-0.130536	0.712149	1	0	-0.65	0.000628	1	1	-0.627482	8.21647e-06	1	1	-0.538402	1.78457e-15	1	1
6	protein_coding	ENSG00000197283	SYNGAP1	6	0	0	-2	13	8	---	---	0	0	0.838508	0.0034875	1	1	-0.431	0.168277	1	0	-0.764641	0.000587709	1	1	---	---	0	0	-0.204747	0.0298449	1	1	0.967637	0.00219824	1	1	---	---	0	0	0.69296	0.0596229	1	0	0.380254	0.18919	1	0
1	protein_coding	ENSG00000055070	SZRD1	6	0	0	-1	15	8	0.175	0.256	1	0	1.60603	0.0074089	1	1	0.406	0.24651	1	0	0.098952	0.442172	1	0	---	---	0	0	-0.34952	0.00375002	1	1	-0.318643	0.307344	1	0	-0.307	0.0216	1	1	-0.0197532	0.941717	1	0	-0.154534	0.0790497	1	0
4	protein_coding	ENSG00000013810	TACC3	6	0	0	-18	16	8	0.208	0.218	1	0	-0.100473	0.622783	1	0	-0.529	0.062186	1	0	-2.39386	1.08057e-55	1	1	-0.0981	0.145	1	0	0.214227	0.0495677	1	-1	-0.420642	0.509717	1	0	-1.47	1.62e-05	1	1	-1.48011	1.39899e-21	1	1	-1.76228	7.04692e-48	1	1
2	protein_coding	ENSG00000115750	TAF1B	6	0	1	-2	16	8	-0.181	0.313	1	0	-0.846157	0.0084288	1	-1	-0.477	0.129517	1	0	-0.587482	0.000546473	1	1	0.0111	0.829	1	0	-0.327298	0.00504521	1	1	0.179832	0.652793	1	0	-0.542	0.00114	1	1	-0.534501	0.0463217	1	1	-0.611927	7.7405e-05	1	1
18	protein_coding	ENSG00000141384	TAF4B	6	1	1	-6	15	8	-0.256	0.148	1	0	-0.959376	0.0192507	1	-1	-1.07	0.039919	1	1	-2.95301	1.29263e-54	1	1	---	---	0	0	-0.268373	0.015724	1	1	2.00629	4.25539e-06	1	1	0.00194	0.993	1	0	0.0561746	0.897418	1	0	0.00791325	0.978234	1	0
5	protein_coding	ENSG00000273841	TAF9	6	0	0	-3	16	8	-0.71	0.000627	1	-1	1.18463	0.0042842	1	1	0.313	0.349466	1	0	-0.559665	1.21893e-05	1	1	-0.082	0.466	1	0	-0.164772	0.0249054	1	1	-0.510768	0.127472	1	0	0.185	0.126	1	0	-0.368262	0.0237587	1	1	-0.323944	0.000568407	1	1
X	protein_coding	ENSG00000187325	TAF9B	6	0	0	-4	16	8	-0.115	0.612	1	0	0.58116	0.0949508	1	0	1.05	0.067676	1	0	-0.245711	0.254582	1	0	-0.243	0.0028	1	1	-1.27628	7.626e-05	1	1	-1.15419	0.000677653	1	-1	-0.259	0.036	1	1	-0.661793	0.081596	1	0	-0.682749	0.00801071	1	1
3	protein_coding	ENSG00000177565	TBL1XR1	6	0	0	-11	16	8	0.0614	0.779	1	0	1.90646	0.0005726	1	1	-0.966	0.147953	1	0	-0.0453086	0.752723	1	0	-0.256	0.0473	1	1	-0.0302743	0.69683	1	0	-0.668412	0.0516213	1	0	-1.54	0.000173	1	1	-0.382518	0.0339466	1	1	-0.245254	0.00477152	1	1
5	protein_coding	ENSG00000113649	TCERG1	6	0	0	-8	16	8	0.204	0.455	1	0	0.326279	0.160025	1	0	0.0711	0.807706	1	0	-1.27446	1.19484e-30	1	1	-0.235	0.0673	1	0	0.10548	0.107906	1	0	-0.151902	0.675276	1	0	0.0162	0.927	1	0	-0.326759	0.049501	1	1	-0.29662	0.000152175	1	1
5	protein_coding	ENSG00000145934	TENM2	6	1	0	-5	10	5	---	---	0	0	-0.346985	0.102383	1	0	-4.02	0.002779	1	1	-5.44648	0	1	1	---	---	0	0	-0.0159579	0.858428	1	0	6.18659	3.143e-08	1	1	---	---	0	0	---	---	0	0	---	---	0	0
10	protein_coding	ENSG00000108064	TFAM	6	1	1	-3	16	8	-0.42	0.0579	1	0	0.913112	0.0031789	1	1	1.52	0.003398	1	-1	0.265327	0.0745461	1	0	-0.518	0.000642	1	1	-0.328997	0.00239881	1	1	-0.175806	0.732645	1	0	-0.353	0.014	1	1	-0.662023	0.000718136	1	1	-0.436333	7.28803e-06	1	1
16	protein_coding	ENSG00000090447	TFAP4	6	1	0	-12	16	8	-0.149	0.347	1	0	-0.0994428	0.676005	1	0	-0.234	0.453142	1	0	-1.48657	8.30598e-09	1	1	-0.00548	0.928	1	0	-0.403101	0.00207343	1	1	-0.72531	0.384149	1	0	-0.356	0.00867	1	1	-0.0265985	0.947789	1	0	-0.10718	0.711249	1	0
2	protein_coding	ENSG00000135966	TGFBRAP1	6	0	0	8	16	8	-0.277	0.0329	1	-1	0.673613	0.0245756	1	1	0.956	0.018914	1	-1	0.403405	0.00631743	1	-1	0.01	0.902	1	0	-0.32434	0.00276113	1	1	0.86383	0.000209017	1	1	-0.492	0.00224	1	1	-0.467265	0.0166981	1	1	-0.544565	4.03293e-06	1	1
12	protein_coding	ENSG00000120802	TMPO	6	0	0	-18	15	8	0.739	0.0104	1	1	0.591245	0.0213607	1	1	0.981	0.008789	1	-1	-0.397533	0.000587418	1	1	---	---	0	0	-0.0064605	0.927392	1	0	-0.466816	0.268305	1	0	-0.775	0.000915	1	1	-1.36523	1.53675e-23	1	1	-1.56785	1.22754e-100	1	1
19	protein_coding	ENSG00000130204	TOMM40	6	0	0	-8	16	8	-0.0846	0.448	1	0	0.466181	0.06649	1	0	0.272	0.396613	1	0	-0.252593	0.116404	1	0	-0.201	0.0238	1	1	0.0759226	0.378686	1	0	-0.062744	0.893985	1	0	-0.0358	0.8	1	0	-0.421941	0.00958043	1	1	-0.464713	5.81118e-07	1	1
3	protein_coding	ENSG00000163781	TOPBP1	6	0	0	-13	16	8	0.472	0.0027	1	1	-0.646438	0.0571812	1	0	0.557	0.132975	1	0	-0.156606	0.304488	1	0	-0.129	0.275	1	0	-0.017155	0.78618	1	0	-0.0437213	0.930803	1	0	-0.0788	0.648	1	0	-0.674915	1.05041e-05	1	1	-0.704226	1.38236e-13	1	1
20	protein_coding	ENSG00000101255	TRIB3	6	1	0	-6	16	8	-0.739	0.000646	1	-1	0.590979	0.0129854	1	1	-1.21	0.043977	1	1	-2.65265	2.9508e-106	1	1	-0.0629	0.676	1	0	-0.437442	0.00066424	1	1	-0.61752	0.73915	1	0	-1.79	7.94e-06	1	1	0.225942	0.254256	1	0	0.204069	0.0769631	1	0
19	protein_coding	ENSG00000130726	TRIM28	6	0	0	-2	15	8	-0.0324	0.872	1	0	0.95175	0.0022116	1	1	0.609	0.053757	1	0	-0.359811	0.000189789	1	1	---	---	0	0	-0.0749899	0.319738	1	0	-0.248336	0.426956	1	0	-0.337	0.0235	1	1	-0.0513544	0.820085	1	0	-0.210371	0.00316638	1	1
6	protein_coding	ENSG00000066651	TRMT11	6	0	0	-4	14	7	-0.0797	0.766	1	0	0.308666	0.260682	1	0	-0.0512	0.92846	1	0	-0.489483	0.130801	1	0	---	---	0	0	0.0650294	0.264516	1	0	0.0608299	0.919635	1	0	-0.814	0.000437	1	1	-0.664137	0.00679204	1	1	-0.447321	0.00613424	1	1
20	protein_coding	ENSG00000089195	TRMT6	6	0	1	-2	14	8	---	---	0	0	1.25069	0.0020183	1	1	1.65	0.004162	1	-1	0.194707	0.340305	1	0	-0.099	0.206	1	0	-0.199544	0.00859754	1	1	0.0901125	0.882258	1	0	---	---	0	0	-0.51907	0.000812868	1	1	-0.378235	3.70668e-05	1	1
2	protein_coding	ENSG00000114999	TTL	6	0	0	-3	14	8	---	---	0	0	1.26884	0.0023869	1	1	1.46	0.004865	1	-1	-0.489297	1.72959e-05	1	1	0.111	0.525	1	0	-0.261182	0.00378898	1	1	0.224079	0.573769	1	0	---	---	0	0	-0.448172	0.00200869	1	1	-0.523476	3.15963e-11	1	1
2	protein_coding	ENSG00000127824	TUBA4A	6	1	0	-1	16	8	0.817	0.00263	1	1	1.03226	0.0049815	1	1	0.648	0.054108	1	0	0.0683926	0.697114	1	0	0.0237	0.911	1	0	0.34308	0.00459926	1	-1	-0.746261	0.0881497	1	0	-0.775	0.000226	1	1	0.17016	0.260156	1	0	0.0810494	0.421413	1	0
18	protein_coding	ENSG00000176014	TUBB6	6	1	1	6	16	8	0.825	0.000657	1	1	0.826517	0.0140479	1	1	0.145	0.68286	1	0	-1.4954	1.00195e-63	1	1	0.261	0.00152	1	-1	-0.132038	0.0535761	1	0	-0.470905	0.0891203	1	0	-0.211	0.076	1	0	-0.590759	2.68408e-05	1	1	-0.606773	5.45071e-23	1	1
15	protein_coding	ENSG00000092445	TYRO3	6	0	0	-8	16	8	-0.336	0.0507	1	0	0.531084	0.027749	1	1	-0.336	0.145148	1	0	-0.778134	2.6807e-11	1	1	-0.144	0.00608	1	1	0.506677	0.00254497	1	-1	0.0945908	0.870665	1	0	-0.411	0.00435	1	1	-0.565368	0.0875233	1	0	-0.72453	0.00261112	1	1
19	protein_coding	ENSG00000126261	UBA2	6	0	0	-7	14	8	---	---	0	0	-0.423287	0.0454025	1	-1	0.175	0.725672	1	0	-0.440234	4.56086e-05	1	1	-0.236	0.00394	1	1	-0.155062	0.0301281	1	1	-0.1651	0.634253	1	0	---	---	0	0	-0.505004	9.73352e-05	1	1	-0.54232	2.21348e-14	1	1
12	protein_coding	ENSG00000177889	UBE2N	6	0	0	0	15	8	0.0391	0.731	1	0	3.03179	9.93e-05	1	1	1.37	0.002918	1	-1	-0.0133061	0.942694	1	0	---	---	0	0	-0.371931	0.00107712	1	1	-0.407332	0.131387	1	0	-0.341	0.0112	1	1	-0.524523	0.000293909	1	1	-0.437261	1.98969e-07	1	1
14	protein_coding	ENSG00000012963	UBR7	6	0	0	-9	16	8	0.633	0.00137	1	1	0.444685	0.104655	1	0	0.781	0.042129	1	-1	0.447112	0.00183742	1	-1	-0.219	0.00388	1	1	-0.424521	0.00352908	1	1	-0.0348838	0.951247	1	0	-0.517	0.00552	1	1	-0.796497	1.91946e-05	1	1	-0.856487	2.20097e-12	1	1
2	protein_coding	ENSG00000173960	UBXN2A	6	1	1	-2	14	8	---	---	0	0	0.859428	0.0071674	1	1	0.486	0.112927	1	0	0.0242814	0.905982	1	0	-0.289	0.00358	1	1	-0.34572	0.00189368	1	1	-0.114786	0.777357	1	0	---	---	0	0	-0.652123	0.00112033	1	1	-0.576191	2.51094e-05	1	1
1	protein_coding	ENSG00000162607	USP1	6	0	0	-15	16	8	-0.21	0.074	1	0	0.789977	0.0221909	1	1	0.736	0.055306	1	0	0.167256	0.24911	1	0	-0.131	0.527	1	0	-0.173121	0.060385	1	0	-0.126718	0.733452	1	0	-0.677	0.00167	1	1	-0.952321	1.12498e-10	1	1	-1.20432	2.75723e-39	1	1
21	protein_coding	ENSG00000156256	USP16	6	0	0	-1	16	8	-0.283	0.149	1	0	1.27229	0.001973	1	1	0.619	0.053767	1	0	0.289796	0.0634013	1	0	-0.256	0.00118	1	1	-0.41536	0.00084757	1	1	-0.358473	0.202976	1	0	-0.131	0.359	1	0	-0.746606	0.000399323	1	1	-0.565668	1.68308e-08	1	1
5	protein_coding	ENSG00000164338	UTP15	6	1	1	-5	14	8	---	---	0	0	0.90627	0.002671	1	1	1.94	0.001771	1	-1	0.0615396	0.821098	1	0	-0.301	0.0168	1	1	-0.116613	0.122191	1	0	-0.143172	0.752916	1	0	---	---	0	0	-0.550415	0.00415655	1	1	-0.373433	0.00398905	1	1
X	protein_coding	ENSG00000101842	VSIG1	6	0	0	2	13	7	---	---	0	0	-1.65795	0.0025864	1	-1	-0.935	0.041438	1	1	-2.40593	5.66221e-07	1	1	-0.0249	0.642	1	0	-0.416297	0.0087628	1	1	6.84454	0.000157623	1	1	---	---	0	0	-0.645254	0.374375	1	0	-0.529029	0.186624	1	0
12	protein_coding	ENSG00000084463	WBP11	6	0	1	-8	16	8	0.311	0.0156	1	1	-1.1143	0.0043202	1	-1	-0.767	0.022492	1	1	-0.872515	8.91738e-13	1	1	-0.057	0.472	1	0	-0.125309	0.131839	1	0	0.048281	0.917724	1	0	-0.19	0.125	1	0	-0.587465	0.000115968	1	1	-0.645588	6.68525e-14	1	1
2	protein_coding	ENSG00000138442	WDR12	6	0	0	-5	16	8	-0.774	0.000332	1	-1	1.08765	0.0089382	1	1	0.958	0.009456	1	-1	-0.0384031	0.87573	1	0	-0.231	0.000185	1	1	-0.358628	0.0115611	1	1	-0.18047	0.685041	1	0	-0.0655	0.617	1	0	-0.232512	0.236121	1	0	-0.23624	0.0495477	1	1
1	protein_coding	ENSG00000065183	WDR3	6	0	0	-5	16	8	-0.551	0.00683	1	-1	0.778081	0.0067288	1	1	1.19	0.004849	1	-1	-0.0601066	0.835527	1	0	-0.36	0.0413	1	1	-0.198989	0.0205729	1	1	-0.108884	0.812206	1	0	0.0269	0.877	1	0	-0.409398	0.0355049	1	1	-0.131388	0.233635	1	0
15	protein_coding	ENSG00000092470	WDR76	6	0	0	-17	15	7	0.401	0.0221	1	1	-0.253892	0.188175	1	0	1.08	0.005744	1	-1	-0.434437	0.0645518	1	0	-0.345	9.89e-05	1	1	-0.0027338	0.977568	1	0	0.275147	0.492447	1	0	-0.465	0.0302	1	1	-0.632663	0.00624978	1	1	-1.34892	2.47146e-11	1	1
1	protein_coding	ENSG00000116455	WDR77	6	0	0	2	16	8	-0.234	0.11	1	0	2.07746	0.0003651	1	1	1.39	0.004654	1	-1	-0.15691	0.470238	1	0	-0.318	0.0136	1	1	-0.300801	0.0202549	1	1	0.258507	0.483665	1	0	-0.0752	0.584	1	0	-0.3169	0.197202	1	0	-0.207919	0.173724	1	0
8	protein_coding	ENSG00000130227	XPO7	6	0	0	-6	16	8	-0.213	0.43	1	0	1.70416	0.0014505	1	1	0.707	0.01871	1	-1	-0.267192	0.0214856	1	1	-0.1	0.394	1	0	-0.170787	0.0245135	1	1	0.12599	0.772768	1	0	-0.389	0.0119	1	1	-0.192132	0.218884	1	0	-0.303774	5.32596e-05	1	1
12	protein_coding	ENSG00000184575	XPOT	6	0	1	-8	16	8	-0.612	0.00507	1	-1	0.287857	0.149704	1	0	0.37	0.10992	1	0	-0.916629	6.03799e-20	1	1	-0.09	0.691	1	0	-0.319849	0.00275296	1	1	-0.173952	0.676493	1	0	-1.06	0.000236	1	1	-0.246005	0.1243	1	0	-0.258404	0.00111035	1	1
7	protein_coding	ENSG00000196584	XRCC2	6	0	0	-12	16	8	-0.11	0.652	1	0	0.240001	0.415013	1	0	-0.139	0.799701	1	0	-1.28951	0.00097271	1	1	-0.0875	0.18	1	0	0.596307	0.00208556	1	-1	0.148604	0.793956	1	0	0.0857	0.682	1	0	-1.01131	1.04774e-05	1	1	-1.82387	9.63322e-27	1	1
17	protein_coding	ENSG00000108953	YWHAE	6	0	0	-3	16	8	-0.258	0.141	1	0	2.16895	0.0003123	1	1	-0.205	0.67185	1	0	-0.329137	0.000326486	1	1	-0.112	0.653	1	0	-0.21077	0.0124922	1	1	-0.577779	0.0141948	1	-1	-0.311	0.0271	1	1	-0.0834488	0.632718	1	0	-0.154845	0.0259232	1	1
1	protein_coding	ENSG00000197056	ZMYM1	6	0	0	-10	15	8	-0.0678	0.866	1	0	-0.483478	0.0554973	1	0	0.249	0.333938	1	0	0.118345	0.548186	1	0	---	---	0	0	0.0260507	0.759791	1	0	-0.20475	0.704252	1	0	-0.359	0.011	1	1	-0.621295	0.0191927	1	1	-0.428042	0.0153196	1	1
6	protein_coding	ENSG00000112200	ZNF451	6	1	0	3	16	8	0.147	0.412	1	0	0.869313	0.0066101	1	1	2.43	0.002097	1	-1	0.801292	2.51274e-13	1	-1	-0.0237	0.697	1	0	-0.143412	0.142869	1	0	0.600863	0.0207069	1	1	-0.252	0.0392	1	1	-0.484308	0.0128285	1	1	-0.398047	0.000460549	1	1
11	protein_coding	ENSG00000109917	ZPR1	6	0	0	0	16	8	-0.719	0.00583	1	-1	-0.303685	0.344352	1	0	0.259	0.52175	1	0	-0.646905	3.22625e-07	1	1	0.0623	0.713	1	0	-0.582463	0.00023307	1	1	0.137232	0.796731	1	0	-0.194	0.154	1	0	-0.187521	0.267572	1	0	-0.186477	0.0350041	1	1
12	protein_coding	ENSG00000094914	AAAS	5	0	1	-5	16	8	0.291	0.0639	1	0	1.00263	0.0026971	1	1	0.134	0.640592	1	0	-0.126712	0.504121	1	0	-0.00697	0.913	1	0	-0.232208	0.012352	1	1	-0.037786	0.941389	1	0	-0.441	0.00379	1	1	-0.156431	0.558869	1	0	-0.235548	0.120259	1	0
11	protein_coding	ENSG00000149313	AASDHPPT	5	0	0	-2	16	8	-0.562	0.00118	1	-1	-0.468079	0.0500625	1	0	0.549	0.082946	1	0	0.46357	0.00242593	1	-1	-0.168	0.123	1	0	-0.490563	0.00032162	1	1	0.0961665	0.817589	1	0	-0.479	0.00478	1	1	-0.529532	0.000866597	1	1	-0.40786	1.16107e-05	1	1
1	protein_coding	ENSG00000135776	ABCB10	5	0	1	-5	14	8	---	---	0	0	0.015924	0.939313	1	0	0.925	0.007634	1	-1	-0.46163	0.0115775	1	1	-0.0252	0.79	1	0	-0.14984	0.0453867	1	1	0.195507	0.615249	1	0	---	---	0	0	-0.744704	9.85267e-06	1	1	-0.57315	2.18605e-09	1	1
4	protein_coding	ENSG00000118777	ABCG2	5	1	1	3	16	8	1.08	0.00075	1	1	-0.0907528	0.623698	1	0	0.297	0.188053	1	0	-2.24129	1.8666e-05	1	1	0.16	0.281	1	0	0.364609	0.00473225	1	-1	2.7403	1.94571e-22	1	1	0.0248	0.934	1	0	-1.12972	0.591141	1	0	-1.52733	0.235634	1	0
15	protein_coding	ENSG00000136379	ABHD17C	5	0	0	3	13	8	---	---	0	0	0.611525	0.012754	1	1	-1.2	0.00792	1	1	-0.8533	1.81182e-09	1	1	---	---	0	0	-0.314584	0.00191224	1	1	-0.577679	0.345033	1	0	---	---	0	0	-0.76768	0.000564049	1	1	-0.606455	0.000468732	1	1
9	protein_coding	ENSG00000177076	ACER2	5	1	0	10	10	7	---	---	0	0	---	---	0	0	---	---	0	0	-1.05144	0.000902478	1	1	---	---	0	0	-0.541948	0.00092568	1	1	2.14431	3.98512e-05	1	1	---	---	0	0	-1.76278	0.029066	1	1	-0.362363	0.237788	1	0
1	protein_coding	ENSG00000162390	ACOT11	5	1	0	0	15	8	0.681	0.00143	1	1	1.07931	0.034295	1	1	-1.47	0.010175	1	1	-0.527683	0.0293074	1	1	---	---	0	0	-0.05491	0.45537	1	0	1.08044	0.0207766	1	1	-0.64	0.00159	1	1	0.361278	0.237187	1	0	0.581208	0.00238382	1	-1
14	protein_coding	ENSG00000072110	ACTN1	5	1	1	-3	16	8	0.149	0.179	1	0	1.843	0.0004264	1	1	0.462	0.078569	1	0	-1.95443	7.4813e-113	1	1	0.0403	0.762	1	0	0.234594	0.00561132	1	-1	-0.114434	0.801539	1	0	-0.792	0.000192	1	1	-0.199281	0.157939	1	0	-0.2518	0.000108087	1	1
6	protein_coding	ENSG00000189007	ADAT2	5	0	0	-3	14	8	---	---	0	0	-0.308965	0.160559	1	0	-0.0455	0.879512	1	0	-1.22235	2.88285e-05	1	1	-0.0527	0.381	1	0	0.133905	0.102324	1	0	-0.0877173	0.932001	1	0	---	---	0	0	0.226131	0.381733	1	0	0.188341	0.333044	1	0
6	protein_coding	ENSG00000153294	ADGRF4	5	1	0	4	13	7	---	---	0	0	1.95517	0.0003854	1	1	-0.809	0.011039	1	1	0.0468267	0.805747	1	0	-0.0265	0.771	1	0	0.0340366	0.647798	1	0	4.32041	3.07661e-05	1	1	---	---	0	0	-0.540095	0.136456	1	0	-0.46224	0.0647371	1	0
4	protein_coding	ENSG00000197894	ADH5	5	1	1	0	16	8	0.146	0.199	1	0	-0.771082	0.0048054	1	-1	-0.371	0.121837	1	0	-0.606136	1.2239e-06	1	1	0.0111	0.895	1	0	-0.340459	0.00337876	1	1	-0.755697	0.000917505	1	-1	-0.253	0.0552	1	0	-0.349522	0.0306155	1	1	-0.250726	0.00206683	1	1
2	protein_coding	ENSG00000084693	AGBL5	5	0	0	8	16	8	-0.117	0.635	1	0	0.737893	0.0074432	1	1	-0.59	0.028803	1	1	-0.137983	0.462943	1	0	-0.0838	0.184	1	0	-0.452745	0.00088997	1	1	0.929011	0.000171517	1	1	-0.213	0.0898	1	0	0.375654	0.255613	1	0	0.193813	0.376437	1	0
10	protein_coding	ENSG00000151632	AKR1C2	5	0	0	-1	15	7	0.396	0.0155	1	1	-0.728925	0.272366	1	0	-2.39	0.022448	1	1	-2.79916	3.73777e-15	1	1	-0.318	0.0852	1	0	-0.297411	0.00629431	1	1	1.26957	0.378709	1	0	-0.0163	0.926	1	0	2.33739	4.97358e-74	1	-1	2.35887	3.52884e-176	1	-1
19	protein_coding	ENSG00000105221	AKT2	5	0	0	0	16	8	-0.151	0.455	1	0	0.932322	0.0026248	1	1	0.234	0.37301	1	0	-0.585865	2.25921e-08	1	1	-0.0349	0.579	1	0	-0.30223	0.0030204	1	1	-0.210323	0.499155	1	0	-0.339	0.0126	1	1	0.112764	0.630991	1	0	0.000811797	0.994711	1	0
5	protein_coding	ENSG00000164904	ALDH7A1	5	1	0	4	15	7	0.14	0.496	1	0	-0.989071	0.0036023	1	-1	-0.542	0.063475	1	0	-1.26557	6.05888e-19	1	1	-0.354	0.00746	1	1	-0.573005	0.00087406	1	1	-0.138584	0.67968	1	0	-0.454	0.00323	1	1	-0.159042	0.448956	1	0	-0.115731	0.31941	1	0
17	protein_coding	ENSG00000183684	ALYREF	5	0	0	-4	14	8	---	---	0	0	2.04313	0.0004616	1	1	1.08	0.015511	1	-1	-0.0254396	0.884949	1	0	-0.0875	0.222	1	0	-0.0757875	0.318133	1	0	-0.258328	0.465336	1	0	---	---	0	0	-0.57807	0.001383	1	1	-0.527928	3.01039e-06	1	1
11	protein_coding	ENSG00000133805	AMPD3	5	1	1	5	15	7	0.524	0.00199	1	1	-0.80834	0.0075835	1	-1	-2.15	0.001557	1	1	-2.48004	1.54458e-64	1	1	-0.0219	0.702	1	0	-0.247211	0.00675941	1	1	1.9369	2.37557e-18	1	1	-0.47	0.00464	1	1	0.0624949	0.871853	1	0	0.178257	0.324535	1	0
8	protein_coding	ENSG00000029534	ANK1	5	0	0	10	15	7	0.177	0.223	1	0	0.62462	0.0317193	1	1	-0.242	0.280967	1	0	-1.70683	0.000499663	1	1	0.0607	0.328	1	0	0.0499609	0.466004	1	0	0.833924	0.00346918	1	1	-0.0678	0.603	1	0	---	---	0	0	1.25204	0.154902	1	0
2	protein_coding	ENSG00000174501	ANKRD36C	5	0	0	0	15	8	0.453	0.38	1	0	0.654266	0.0247522	1	1	-0.904	0.018799	1	1	0.402229	0.316927	1	0	---	---	0	0	0.483733	0.0879237	1	0	1.27443	0.0182214	1	1	-0.238	0.0953	1	0	0.547713	0.444427	1	0	-0.223947	0.7077	1	0
9	protein_coding	ENSG00000135046	ANXA1	5	1	1	0	16	8	0.00787	0.967	1	0	0.2652	0.174546	1	0	-0.341	0.201427	1	0	-1.28563	9.60869e-47	1	1	-0.173	0.15	1	0	0.0159245	0.8529	1	0	-0.0543883	0.901368	1	0	0.286	0.0443	1	-1	-0.7616	2.71046e-09	1	1	-0.527349	1.22603e-17	1	1
2	protein_coding	ENSG00000152056	AP1S3	5	0	1	3	13	8	---	---	0	0	0.340909	0.127833	1	0	0.337	0.21379	1	0	-1.03037	3.4948e-11	1	1	---	---	0	0	-0.641666	0.00032986	1	1	1.48498	8.21065e-06	1	1	---	---	0	0	-0.972504	0.00221073	1	1	-0.865451	3.47339e-07	1	1
17	protein_coding	ENSG00000006125	AP2B1	5	1	1	-1	16	8	0.754	0.000827	1	1	-1.16682	0.0099689	1	-1	0.0851	0.886771	1	0	-1.13489	6.35195e-25	1	1	0.0989	0.0546	1	0	-0.0616172	0.40439	1	0	0.172654	0.700229	1	0	0.244	0.114	1	0	-0.343886	0.00528235	1	1	-0.387228	1.61337e-11	1	1
5	protein_coding	ENSG00000120318	ARAP3	5	1	0	0	16	8	-0.209	0.314	1	0	0.844551	0.0078935	1	1	1.05	0.019011	1	-1	0.369882	0.108693	1	0	0.0898	0.0764	1	0	-0.100344	0.095019	1	0	0.332201	0.37571	1	0	-0.823	0.000338	1	1	0.105202	0.659673	1	0	0.0343764	0.841184	1	0
4	protein_coding	ENSG00000109321	AREG	5	0	0	7	16	8	0.455	0.0165	1	1	-0.968261	0.0032742	1	-1	-1.48	0.003058	1	1	-3.6887	1.39571e-248	1	1	-0.256	0.472	1	0	0.957249	0.00026834	1	-1	1.47307	0.50225	1	0	-0.97	0.000955	1	1	-1.97925	4.83261e-47	1	1	-0.852872	1.04016e-55	1	1
10	protein_coding	ENSG00000213390	ARHGAP19	5	0	0	-15	16	8	0.17	0.255	1	0	-2.0123	0.0030709	1	-1	-0.582	0.213577	1	0	0.0158003	0.952922	1	0	-0.00345	0.982	1	0	-0.221397	0.00660969	1	1	-0.0759008	0.902872	1	0	-0.921	0.000174	1	1	-1.04274	1.87018e-06	1	1	-0.851485	1.42515e-08	1	1
10	protein_coding	ENSG00000128805	ARHGAP22	5	1	1	5	14	6	-0.169	0.413	1	0	-1.01541	0.0017971	1	-1	-0.767	0.014088	1	1	-2.51145	9.44923e-16	1	1	-0.081	0.269	1	0	-0.338435	0.0194099	1	1	-0.483486	0.104659	1	0	-0.421	0.00714	1	1	-0.703482	0.0344286	1	1	-0.548803	0.003066	1	1
14	protein_coding	ENSG00000100852	ARHGAP5	5	0	0	-5	16	8	-0.323	0.175	1	0	-2.17462	0.0016859	1	-1	-1.36	0.011389	1	1	-0.898471	5.03111e-21	1	1	0.41	0.0405	1	-1	-0.463018	0.00070527	1	1	0.0999861	0.789466	1	0	0.00239	0.992	1	0	-0.485202	0.0102922	1	1	-0.249395	0.00783351	1	1
9	protein_coding	ENSG00000137135	ARHGEF39	5	0	0	-16	14	8	---	---	0	0	0.292582	0.349242	1	0	0.215	0.548009	1	0	-1.40922	7.45319e-05	1	1	-0.0225	0.696	1	0	0.148288	0.0549313	1	0	-0.547434	0.401604	1	0	---	---	0	0	-1.23441	0.000178949	1	1	-1.73678	1.39769e-09	1	1
2	protein_coding	ENSG00000136002	ARHGEF4	5	1	0	3	16	8	-0.309	0.112	1	0	0.824474	0.0149182	1	1	-0.97	0.024664	1	1	-0.88923	2.54384e-14	1	1	0.00703	0.937	1	0	0.050606	0.447477	1	0	-0.282581	0.62401	1	0	-0.665	0.00163	1	1	0.487828	0.0250492	1	-1	0.400826	0.00331394	1	-1
1	protein_coding	ENSG00000117713	ARID1A	5	0	1	-5	16	8	0.0982	0.458	1	0	0.829497	0.0045193	1	1	0.475	0.130528	1	0	-0.286879	0.00724759	1	1	-0.0421	0.623	1	0	0.0544227	0.384629	1	0	0.678282	0.0185471	1	1	-0.43	0.00773	1	1	-0.124941	0.540462	1	0	-0.183168	0.0763103	1	0
15	protein_coding	ENSG00000179361	ARID3B	5	1	1	0	12	8	---	---	0	0	---	---	0	0	---	---	0	0	-1.90675	1.2075e-17	1	1	0.0778	0.472	1	0	0.292892	0.0110745	1	-1	1.55385	0.0020272	1	1	---	---	0	0	-0.0760714	0.921688	1	0	-0.374616	0.260563	1	0
17	protein_coding	ENSG00000175906	ARL4D	5	0	0	1	16	8	-0.714	0.00816	1	-1	-0.18446	0.328875	1	0	-1.02	0.028441	1	1	-0.276712	0.078759	1	0	-0.049	0.513	1	0	-0.233182	0.0349297	1	1	0.240289	0.544951	1	0	-0.465	0.00252	1	1	-0.147715	0.659173	1	0	-0.269309	0.235588	1	0
9	protein_coding	ENSG00000136950	ARPC5L	5	0	0	0	16	8	-0.0386	0.838	1	0	0.851146	0.0189633	1	1	0.34	0.273227	1	0	-0.43873	6.17656e-05	1	1	-0.16	0.00404	1	1	-0.0722358	0.342489	1	0	-0.106057	0.831224	1	0	0.00545	0.974	1	0	-0.554627	0.00283426	1	1	-0.6179	1.75289e-06	1	1
1	protein_coding	ENSG00000117407	ARTN	5	1	0	0	14	7	0.322	0.0541	1	0	-0.582988	0.0199645	1	-1	-1.77	0.002128	1	1	-3.0122	3.73774e-84	1	1	---	---	0	0	-0.0287757	0.624205	1	0	0.46191	0.792878	1	0	0.0938	0.617	1	0	-1.2989	0.00973933	1	1	-1.36424	7.21508e-05	1	1
20	protein_coding	ENSG00000087586	AURKA	5	0	1	-20	16	8	0.0491	0.826	1	0	-1.83696	0.000569	1	-1	-1.27	0.004473	1	1	-1.94433	9.17822e-36	1	1	-0.0424	0.66	1	0	0.275566	0.00553635	1	-1	-1.84287	6.79381e-05	1	-1	-1.37	1.37e-05	1	1	-2.05717	7.07944e-45	1	1	-2.26482	5.41674e-88	1	1
11	protein_coding	ENSG00000175334	BANF1	5	0	1	-2	16	8	0.183	0.532	1	0	1.11006	0.0018123	1	1	0.76	0.016055	1	-1	0.0382208	0.862247	1	0	-0.103	0.566	1	0	-0.486435	0.00080609	1	1	-0.402612	0.177936	1	0	-0.274	0.0397	1	1	-0.543908	0.0019556	1	1	-0.428849	8.44775e-05	1	1
10	protein_coding	ENSG00000107949	BCCIP	5	0	0	-3	16	8	-0.412	0.0137	1	-1	1.62477	0.0014154	1	1	1.54	0.00266	1	-1	-0.456487	0.000755187	1	1	-0.176	0.0301	1	1	-0.210934	0.0569315	1	0	-0.268746	0.386211	1	0	0.0281	0.861	1	0	-0.367947	0.0763592	1	0	-0.233548	0.0313452	1	1
3	protein_coding	ENSG00000134107	BHLHE40	5	0	0	8	16	8	1.35	0.00142	1	1	-4.41358	0.0002994	1	-1	-4.87	0.001761	1	1	-1.49971	1.4588e-05	1	1	-0.0105	0.917	1	0	-0.270956	0.00349315	1	1	-0.331806	0.535805	1	0	-0.799	0.000297	1	1	0.851297	5.87571e-09	1	-1	0.684286	3.65083e-18	1	-1
17	protein_coding	ENSG00000089685	BIRC5	5	0	0	-18	16	8	0.174	0.374	1	0	-1.20867	0.0034804	1	-1	-1.2	0.005925	1	1	-2.75557	2.31863e-86	1	1	0.00418	0.972	1	0	-0.0220002	0.792875	1	0	-1.03869	0.0243755	1	-1	-1.83	5.46e-06	1	1	-1.77376	2.40726e-33	1	1	-1.72075	1.3789e-65	1	1
17	protein_coding	ENSG00000108578	BLMH	5	1	0	-2	16	8	-0.15	0.645	1	0	4.50645	0.000402	1	1	-0.863	0.188021	1	0	-1.83546	2.91241e-18	1	1	-0.0924	0.19	1	0	-0.129385	0.113818	1	0	0.352453	0.26436	1	0	-0.254	0.0595	1	0	-0.537615	0.00230232	1	1	-0.438696	4.73761e-05	1	1
10	protein_coding	ENSG00000196072	BLOC1S2	5	1	1	20	13	8	---	---	0	0	0.475141	0.0438258	1	1	0.293	0.344121	1	0	0.725845	1.28008e-09	1	-1	---	---	0	0	-0.355967	0.00240857	1	1	-0.533624	0.181987	1	0	---	---	0	0	-0.55109	0.00346545	1	1	-0.0746472	0.540641	1	0
15	protein_coding	ENSG00000104164	BLOC1S6	5	0	0	-3	14	8	---	---	0	0	-1.41681	0.0010322	1	-1	-1.07	0.014446	1	1	-0.791108	2.81614e-09	1	1	-0.0497	0.721	1	0	-0.484936	0.00050278	1	1	-0.246395	0.415763	1	0	---	---	0	0	-0.396264	0.037308	1	1	-0.364072	0.000695773	1	1
13	protein_coding	ENSG00000136122	BORA	5	0	0	-15	16	8	0.119	0.572	1	0	-0.170896	0.59268	1	0	0.261	0.540857	1	0	-0.0899549	0.829887	1	0	-0.253	0.000445	1	1	-0.120848	0.297813	1	0	-1.29971	0.0418245	1	-1	-0.907	0.000647	1	1	-1.47357	3.1591e-12	1	1	-1.42646	2.889e-21	1	1
5	protein_coding	ENSG00000113460	BRIX1	5	0	0	-8	16	8	-0.131	0.457	1	0	0.257433	0.215537	1	0	0.5	0.06629	1	0	0.322511	0.0940597	1	0	-0.28	0.00197	1	1	-0.214988	0.0536469	1	0	-0.229268	0.589245	1	0	0.0388	0.801	1	0	-0.584026	0.00471039	1	1	-0.502829	6.21439e-06	1	1
15	protein_coding	ENSG00000156970	BUB1B	5	0	0	-20	16	8	0.547	0.00423	1	1	-0.556848	0.0407971	1	-1	-0.544	0.084672	1	0	-2.13086	2.07563e-31	1	1	-0.003	0.992	1	0	0.157194	0.033886	1	-1	-0.910018	0.14527	1	0	-1.98	1.37e-05	1	1	-1.99974	2.84906e-36	1	1	-2.42591	5.87914e-83	1	1
1	protein_coding	ENSG00000116922	C1orf109	5	0	0	-2	16	8	-0.817	0.00469	1	-1	-0.260397	0.325111	1	0	0.459	0.125666	1	0	-0.0973654	0.750274	1	0	-0.00588	0.929	1	0	-0.286058	0.013988	1	1	-0.3887	0.277981	1	0	0.0498	0.787	1	0	-0.549979	0.0289866	1	1	-0.476589	0.00435458	1	1
2	protein_coding	ENSG00000135932	CAB39	5	1	1	0	16	8	0.00794	0.967	1	0	0.286216	0.175653	1	0	-0.538	0.041092	1	1	-0.938921	6.01634e-27	1	1	-0.408	0.000562	1	1	-0.0779602	0.302982	1	0	-0.259085	0.40028	1	0	-0.267	0.0499	1	1	-0.99137	4.09897e-11	1	1	-0.778342	2.33291e-30	1	1
2	protein_coding	ENSG00000084774	CAD	5	1	1	-6	16	8	-0.699	0.00836	1	-1	1.53738	0.0005514	1	1	1.2	0.004373	1	-1	-1.49642	2.56802e-32	1	1	-0.139	0.16	1	0	0.0147071	0.897334	1	0	0.663577	0.0111284	1	1	-0.326	0.0154	1	1	0.1595	0.387791	1	0	-0.0102064	0.938416	1	0
4	protein_coding	ENSG00000164305	CASP3	5	0	0	0	16	8	0.305	0.295	1	0	-0.406425	0.058302	1	0	0.158	0.519275	1	0	-0.123703	0.466409	1	0	-0.35	0.000323	1	1	-0.35699	0.0115432	1	1	-0.0603253	0.898538	1	0	-0.188	0.126	1	0	-0.387589	0.0441326	1	1	-0.452831	5.46789e-05	1	1
6	protein_coding	ENSG00000118412	CASP8AP2	5	0	0	-9	16	8	0.577	0.13	1	0	1.14267	0.0284136	1	1	1.07	0.064028	1	0	0.364471	0.014156	1	-1	0.025	0.902	1	0	0.0816828	0.344854	1	0	0.727359	0.00966629	1	1	-0.604	0.00365	1	1	-0.383693	0.0932457	1	0	-0.555677	0.000790055	1	1
11	protein_coding	ENSG00000110395	CBL	5	0	0	-2	16	8	0.224	0.239	1	0	0.856296	0.128166	1	0	-0.546	0.158084	1	0	-0.668548	2.31741e-10	1	1	0.00358	0.954	1	0	0.104847	0.130786	1	0	0.595734	0.0367459	1	1	-0.0404	0.823	1	0	-0.44554	0.0042294	1	1	-0.374742	6.76064e-05	1	1
19	protein_coding	ENSG00000142273	CBLC	5	0	0	0	15	7	-0.00396	0.987	1	0	0.600677	0.0204783	1	1	-0.578	0.045518	1	1	0.249919	0.0554411	1	0	0.0427	0.428	1	0	0.0585703	0.3652	1	0	---	---	0	0	-0.732	0.000983	1	1	-0.289154	0.417934	1	0	-0.177822	0.446674	1	0
21	protein_coding	ENSG00000159231	CBR3	5	0	0	-5	15	8	0.572	0.00584	1	1	0.246294	0.213942	1	0	-0.248	0.347761	1	0	0.183715	0.828231	1	0	---	---	0	0	-0.101631	0.1954	1	0	-1.26509	4.06279e-06	1	-1	-0.55	0.00133	1	1	-1.03333	0.0267645	1	1	-1.23204	0.00256963	1	1
11	protein_coding	ENSG00000110104	CCDC86	5	0	0	-5	16	8	-0.642	0.0044	1	-1	0.658641	0.0095287	1	1	0.612	0.035752	1	-1	-1.43919	1.26891e-17	1	1	-0.286	0.0217	1	1	-0.143511	0.163824	1	0	0.406209	0.319427	1	0	-0.0716	0.591	1	0	-0.257989	0.13815	1	0	-0.185076	0.102648	1	0
2	protein_coding	ENSG00000115355	CCDC88A	5	0	0	-10	15	8	-0.109	0.517	1	0	1.68997	0.006253	1	1	-1.31	0.047054	1	1	-2.07841	5.5068e-35	1	1	---	---	0	0	0.607714	0.00103961	1	-1	-0.523825	0.125336	1	0	-0.242	0.0869	1	0	-0.595461	0.00297753	1	1	-0.352364	0.000772232	1	1
15	protein_coding	ENSG00000157456	CCNB2	5	0	0	-18	16	8	0.303	0.146	1	0	-0.719702	0.0120069	1	-1	-0.767	0.019314	1	1	-1.9427	3.1313e-36	1	1	0.0422	0.67	1	0	0.123725	0.0677056	1	0	-1.26672	0.00623049	1	-1	-1.62	1.06e-05	1	1	-1.52296	3.1433e-21	1	1	-1.72922	1.56472e-50	1	1
12	protein_coding	ENSG00000118971	CCND2	5	0	1	5	15	7	-0.298	0.204	1	0	-2.52688	0.0002675	1	-1	0.627	0.077214	1	0	-1.40487	3.84302e-47	1	1	-0.52	0.00237	1	1	-0.378471	0.00077876	1	1	3.56535	0.00952083	1	1	-0.176	0.277	1	0	0.1578	0.340242	1	0	0.185823	0.0170475	1	-1
16	protein_coding	ENSG00000162063	CCNF	5	1	0	-18	16	8	0.0807	0.728	1	0	-0.764791	0.0143093	1	-1	-0.232	0.500206	1	0	-1.52951	9.35906e-32	1	1	0.0236	0.84	1	0	0.104801	0.36837	1	0	-0.462726	0.464375	1	0	-1.27	4.26e-05	1	1	-1.62976	4.53352e-24	1	1	-1.80355	2.6504e-40	1	1
2	protein_coding	ENSG00000135624	CCT7	5	0	0	1	16	8	-0.355	0.23	1	0	1.16934	0.0011562	1	1	0.357	0.145836	1	0	-0.843964	1.2657e-16	1	1	-0.406	6.44e-05	1	1	-0.156872	0.0361004	1	1	-0.480722	0.0872241	1	0	-0.0211	0.893	1	0	-0.123758	0.485987	1	0	-0.037745	0.683132	1	0
1	protein_coding	ENSG00000158473	CD1D	5	0	0	0	12	5	0.534	0.00438	1	1	0.500979	0.120818	1	0	-0.555	0.048101	1	1	-3.85711	7.747e-09	1	1	---	---	0	0	-0.147629	0.0624912	1	0	6.75728	0.000230184	1	1	0.143	0.346	1	0	-0.952975	0.0763029	1	0	-1.07577	0.00106311	1	1
11	protein_coding	ENSG00000085117	CD82	5	1	1	11	16	8	0.674	0.0344	1	1	0.115887	0.545826	1	0	-1.15	0.005051	1	1	-1.61136	1.12601e-48	1	1	-0.636	0.000321	1	1	0.427294	0.00092083	1	-1	1.49996	0.000157907	1	1	-0.516	0.00219	1	1	-0.221534	0.270653	1	0	-0.0119814	0.935803	1	0
3	protein_coding	ENSG00000164045	CDC25A	5	0	0	-18	16	8	0.331	0.0614	1	0	0.781743	0.0207543	1	1	0.891	0.024567	1	-1	-1.41143	4.19567e-10	1	1	-0.0729	0.111	1	0	0.292015	0.0330365	1	-1	0.41271	0.275464	1	0	-0.423	0.00912	1	1	-0.972014	5.15688e-07	1	1	-1.82039	1.13042e-28	1	1
1	protein_coding	ENSG00000070831	CDC42	5	0	0	1	16	8	0.398	0.0134	1	1	-0.262426	0.159063	1	0	-0.299	0.31316	1	0	0.192422	0.0613032	1	0	-0.306	2.06e-05	1	1	0.106346	0.381577	1	0	-0.447285	0.0827244	1	0	0.232	0.071	1	0	-0.337498	0.0229976	1	1	-0.163152	0.0390549	1	1
6	protein_coding	ENSG00000096401	CDC5L	5	0	0	-4	15	8	0.0949	0.475	1	0	1.9915	0.0014634	1	1	-0.795	0.136193	1	0	-0.153607	0.273132	1	0	---	---	0	0	-0.0552651	0.451814	1	0	0.229175	0.48944	1	0	-0.384	0.00823	1	1	-0.589782	0.000306666	1	1	-0.498346	9.63991e-06	1	1
1	protein_coding	ENSG00000097046	CDC7	5	0	0	-12	16	8	0.355	0.2	1	0	0.435518	0.0389527	1	1	0.948	0.025257	1	-1	-0.593788	0.00740959	1	1	-0.0706	0.0583	1	0	-0.164567	0.236542	1	0	0.00311653	0.996173	1	0	-0.827	0.00258	1	1	-1.3663	1.09011e-09	1	1	-1.41208	4.27498e-21	1	1
8	protein_coding	ENSG00000184661	CDCA2	5	0	0	-18	13	8	---	---	0	0	-1.25001	0.0046846	1	-1	-1.51	0.006064	1	1	-1.98934	1.82902e-28	1	1	---	---	0	0	0.138289	0.100715	1	0	-0.357733	0.587964	1	0	---	---	0	0	-2.08149	1.65246e-42	1	1	-2.18668	2.0165e-68	1	1
17	protein_coding	ENSG00000167258	CDK12	5	0	1	-2	16	8	-0.201	0.268	1	0	0.881486	0.0073687	1	1	1.25	0.007488	1	-1	-0.229696	0.0422745	1	1	-0.0967	0.363	1	0	0.066237	0.300532	1	0	0.209914	0.594046	1	0	0.241	0.0615	1	0	-0.490041	0.00360249	1	1	-0.331919	0.000904082	1	1
19	protein_coding	ENSG00000153879	CEBPG	5	1	1	-8	15	8	-1.14	0.000987	1	-1	-0.60193	0.0149646	1	-1	-1.73	0.00439	1	1	-0.0992436	0.54803	1	0	---	---	0	0	-0.409457	0.00158688	1	1	0.216486	0.739917	1	0	-1.11	6.81e-05	1	1	-0.501839	0.00295181	1	1	-0.254584	0.0217342	1	1
2	protein_coding	ENSG00000115163	CENPA	5	0	0	-18	16	8	-0.2	0.111	1	0	-0.762539	0.0470561	1	-1	-1.01	0.026741	1	1	-2.41261	2.24025e-21	1	1	-0.0677	0.275	1	0	-0.0632747	0.413104	1	0	-1.56299	0.0270402	1	-1	-1.81	5.46e-06	1	1	-2.09413	5.03945e-17	1	1	-2.69645	1.09151e-29	1	1
1	protein_coding	ENSG00000117724	CENPF	5	0	1	-19	16	8	0.328	0.0263	1	1	-1.39864	0.0029755	1	-1	-1.43	0.012267	1	1	-2.35151	2.92092e-71	1	1	-0.0303	0.825	1	0	0.343886	0.00153949	1	-1	-0.761766	0.195746	1	0	-2.26	3.27e-06	1	1	-1.99392	2.14587e-47	1	1	-2.14224	9.42835e-233	1	1
4	protein_coding	ENSG00000151725	CENPU	5	1	0	-13	16	8	0.402	0.0687	1	0	-0.941201	0.0032985	1	-1	1.09	0.017251	1	-1	0.636994	0.000812384	1	-1	-0.351	3.67e-05	1	1	-0.204605	0.0497816	1	1	0.165858	0.706057	1	0	-1.6	1.44e-05	1	1	-1.24706	5.62222e-10	1	1	-1.95283	8.88481e-41	1	1
17	protein_coding	ENSG00000169689	CENPX	5	0	0	-6	16	8	0.354	0.00952	1	1	0.0200082	0.922531	1	0	0.0755	0.763418	1	0	0.00455966	0.985168	1	0	-0.0544	0.698	1	0	-0.0423769	0.578643	1	0	-0.697826	0.0205936	1	-1	-0.458	0.00279	1	1	-0.189574	0.610679	1	0	-0.746311	4.82624e-05	1	1
4	protein_coding	ENSG00000174799	CEP135	5	0	0	-9	16	8	0.449	0.0271	1	1	-0.723729	0.0265205	1	-1	0.215	0.496465	1	0	0.186997	0.476799	1	0	-0.0175	0.926	1	0	0.136982	0.106412	1	0	-0.252869	0.540267	1	0	-0.334	0.0178	1	1	-0.8736	0.000301455	1	1	-0.775943	1.6539e-06	1	1
16	protein_coding	ENSG00000172831	CES2	5	1	1	20	15	8	-0.143	0.281	1	0	-1.78667	0.0018684	1	-1	-1.58	0.004739	1	1	-1.11422	2.91984e-36	1	1	---	---	0	0	-0.545217	0.00045892	1	1	1.1373	0.000582258	1	1	0.465	0.00429	1	-1	0.0299213	0.915691	1	0	0.21443	0.0180789	1	-1
2	protein_coding	ENSG00000143942	CHAC2	5	0	0	-7	13	8	---	---	0	0	1.13205	0.019349	1	1	1.23	0.019419	1	-1	-1.05962	0.00410995	1	1	---	---	0	0	-0.2233	0.0616884	1	0	-0.154651	0.816585	1	0	---	---	0	0	-1.05739	0.00730072	1	1	-0.873171	0.000314594	1	1
12	protein_coding	ENSG00000111642	CHD4	5	0	0	-5	16	8	0.395	0.0189	1	1	1.0462	0.0019926	1	1	0.383	0.108006	1	0	-0.0175274	0.906405	1	0	-0.182	0.0639	1	0	0.416545	0.00878047	1	-1	0.116527	0.783821	1	0	-0.39	0.00931	1	1	-0.237823	0.106657	1	0	-0.267947	0.000170789	1	1
11	protein_coding	ENSG00000149554	CHEK1	5	0	0	-17	16	8	0.586	0.00258	1	1	-1.33959	0.0037266	1	-1	-0.27	0.499098	1	0	-0.699037	0.000329137	1	1	-0.0496	0.694	1	0	-0.0047926	0.952843	1	0	-0.214956	0.588526	1	0	-0.761	0.000293	1	1	-0.610381	0.000178981	1	1	-0.822838	8.32554e-17	1	1
11	protein_coding	ENSG00000110172	CHORDC1	5	0	0	-2	14	8	---	---	0	0	-0.182149	0.379362	1	0	-0.00905	0.975707	1	0	-0.418052	0.0186638	1	1	-1.26	1.41e-06	1	1	0.117437	0.419294	1	0	0.186904	0.631343	1	0	---	---	0	0	-0.456138	0.0880134	1	0	-0.272184	0.0732976	1	0
2	protein_coding	ENSG00000074054	CLASP1	5	1	1	-4	16	8	-0.0133	0.957	1	0	-0.217267	0.233345	1	0	-0.444	0.090238	1	0	-0.424752	4.36689e-05	1	1	-0.00752	0.927	1	0	-0.161824	0.0303238	1	1	0.481139	0.251401	1	0	-0.346	0.183	1	0	-0.263187	0.177103	1	0	-0.248976	0.0241893	1	1
1	protein_coding	ENSG00000137975	CLCA2	5	1	0	11	14	6	-0.925	0.000202	1	-1	2.39758	0.0001775	1	1	-0.447	0.240038	1	0	0.709746	3.70734e-13	1	-1	-0.0671	0.555	1	0	-0.437594	0.00101196	1	1	1.47614	0.00355316	1	1	-0.708	0.00037	1	1	0.124347	0.483685	1	0	0.442383	1.47839e-10	1	-1
6	protein_coding	ENSG00000111799	COL12A1	5	1	0	1	14	8	---	---	0	0	-0.902385	0.0689202	1	0	-1.73	0.036613	1	1	-3.41933	1.28339e-122	1	1	-0.562	0.000564	1	1	0.535933	0.00038207	1	-1	0.294917	0.558713	1	0	---	---	0	0	-0.102671	0.664322	1	0	-0.154334	0.0995264	1	0
17	protein_coding	ENSG00000141030	COPS3	5	0	0	-4	16	8	-0.428	0.00355	1	-1	0.604009	0.0119478	1	1	0.864	0.057621	1	0	0.126992	0.406068	1	0	-0.12	0.257	1	0	-0.239011	0.00535085	1	1	-0.418116	0.140563	1	0	-0.194	0.101	1	0	-0.628048	4.40527e-05	1	1	-0.623703	3.04794e-13	1	1
16	protein_coding	ENSG00000102879	CORO1A	5	0	0	2	15	7	0.889	0.00117	1	1	0.361952	0.243011	1	0	-0.682	0.082305	1	0	-2.78351	1.4033e-14	1	1	0.0847	0.218	1	0	0.480653	0.0005357	1	-1	1.80481	0.000117315	1	1	-0.201	0.155	1	0	-1.20954	0.00459926	1	1	-1.28364	8.64223e-06	1	1
9	protein_coding	ENSG00000106789	CORO2A	5	0	1	4	15	8	0.289	0.218	1	0	-1.34019	0.0042736	1	-1	-1.93	0.004421	1	1	-1.38602	3.37638e-28	1	1	---	---	0	0	-0.678928	0.00022711	1	1	2.08687	8.17503e-14	1	1	-0.132	0.303	1	0	-0.364828	0.0917498	1	0	-0.44682	0.00182267	1	1
1	protein_coding	ENSG00000143320	CRABP2	5	0	1	3	15	7	1.23	0.000373	1	1	1.40787	0.0013121	1	1	-1.39	0.008085	1	1	0.231294	0.60529	1	0	0.338	0.108	1	0	-0.876076	0.00018339	1	1	-0.611427	0.0777668	1	0	-0.509	0.00184	1	1	-0.540015	0.481425	1	0	-0.717052	0.19683	1	0
1	protein_coding	ENSG00000143162	CREG1	5	0	0	1	16	8	-0.765	0.00109	1	-1	0.144365	0.599765	1	0	-1.47	0.014191	1	1	-0.712241	2.28232e-11	1	1	-0.2	0.00882	1	1	-0.0563887	0.463788	1	0	0.554842	0.153266	1	0	-0.11	0.404	1	0	-0.371615	0.0194257	1	1	-0.120914	0.12914	1	0
11	protein_coding	ENSG00000109861	CTSC	5	0	0	-9	16	8	1.71	0.000238	1	1	2.91339	0.0039852	1	1	-1.16	0.083755	1	0	-1.96717	9.61073e-86	1	1	-0.104	0.349	1	0	0.33379	0.0017707	1	-1	0.669223	0.0559043	1	0	-0.665	0.000455	1	1	-0.398589	0.000924352	1	1	-0.497906	2.35741e-17	1	1
7	protein_coding	ENSG00000055130	CUL1	5	0	0	0	16	8	-0.221	0.165	1	0	1.93621	0.0003018	1	1	0.157	0.606221	1	0	-0.734	1.0684e-11	1	1	-0.092	0.617	1	0	-0.143642	0.0396286	1	1	-0.152204	0.706146	1	0	0.0148	0.937	1	0	-0.24466	0.128519	1	0	-0.29368	0.000528741	1	1
5	protein_coding	ENSG00000153015	CWC27	5	0	0	-5	13	8	---	---	0	0	0.426032	0.0469701	1	1	-0.526	0.044747	1	1	-1.31874	2.5062e-16	1	1	---	---	0	0	-0.144197	0.0409346	1	1	-0.642452	0.0479609	1	-1	---	---	0	0	0.00201043	0.996705	1	0	0.17331	0.321654	1	0
18	protein_coding	ENSG00000154832	CXXC1	5	0	0	-1	16	8	-0.157	0.277	1	0	0.572749	0.0150619	1	1	0.279	0.217823	1	0	-1.16984	4.61444e-24	1	1	0.0766	0.434	1	0	-0.296909	0.00164677	1	1	0.213147	0.61236	1	0	-0.488	0.00269	1	1	0.276374	0.289138	1	0	0.231373	0.17636	1	0
6	protein_coding	ENSG00000065615	CYB5R4	5	0	0	-1	16	8	-0.222	0.457	1	0	1.37851	0.002757	1	1	0.146	0.639926	1	0	0.263881	0.150435	1	0	0.00523	0.973	1	0	-0.585165	0.00051617	1	1	-0.436438	0.259312	1	0	-0.123	0.338	1	0	-0.646338	0.00302695	1	1	-0.641457	1.80953e-06	1	1
9	protein_coding	ENSG00000136848	DAB2IP	5	1	0	2	14	8	---	---	0	0	0.417307	0.0519946	1	0	-0.122	0.856371	1	0	-0.631515	1.49576e-08	1	1	-0.506	0.0173	1	1	-0.59124	0.0003062	1	1	1.29015	2.67634e-08	1	1	---	---	0	0	-0.128047	0.613323	1	0	-0.289973	0.0263004	1	1
19	protein_coding	ENSG00000132017	DCAF15	5	0	1	-9	16	8	0.372	0.00707	1	1	0.759441	0.0133694	1	1	-0.4	0.120844	1	0	-0.238785	0.136217	1	0	-0.0279	0.496	1	0	0.0723222	0.405992	1	0	0.105513	0.832281	1	0	-0.34	0.0241	1	1	-0.273394	0.344834	1	0	-0.645418	3.04102e-05	1	1
1	protein_coding	ENSG00000118655	DCLRE1B	5	0	0	-13	16	8	0.402	0.00694	1	1	0.443262	0.0385935	1	1	0.886	0.036824	1	-1	-0.0778359	0.785539	1	0	-0.0592	0.271	1	0	-0.155783	0.0549243	1	0	0.384386	0.287958	1	0	-0.466	0.00474	1	1	-0.496289	0.0502451	1	0	-0.965361	2.00443e-07	1	1
16	protein_coding	ENSG00000166847	DCTN5	5	0	0	0	15	8	-0.23	0.36	1	0	1.10071	0.0023668	1	1	1.08	0.00607	1	-1	0.121876	0.318681	1	0	---	---	0	0	-0.399727	0.00072312	1	1	0.502139	0.0398752	1	1	-0.37	0.022	1	1	-0.259711	0.12778	1	0	-0.0523473	0.648914	1	0
3	protein_coding	ENSG00000043093	DCUN1D1	5	0	0	3	16	8	-0.057	0.819	1	0	1.89542	0.0003646	1	1	-0.878	0.019362	1	1	-0.476703	4.06891e-05	1	1	0.00213	0.975	1	0	-0.325312	0.0714537	1	0	-0.00379871	0.994533	1	0	-0.198	0.189	1	0	-0.558779	0.0129817	1	1	-0.484265	0.000491588	1	1
11	protein_coding	ENSG00000137692	DCUN1D5	5	1	0	-5	14	8	---	---	0	0	0.548677	0.0275339	1	1	0.748	0.018587	1	-1	-0.0170336	0.940216	1	0	-0.492	0.000384	1	1	0.0216829	0.766839	1	0	-0.550752	0.0523827	1	0	---	---	0	0	-0.636069	0.000104439	1	1	-0.448084	1.31052e-06	1	1
19	protein_coding	ENSG00000123136	DDX39A	5	0	1	-8	16	8	0.367	0.121	1	0	-0.0208281	0.952148	1	0	-0.183	0.6389	1	0	-1.3045	8.21698e-25	1	1	-0.173	0.21	1	0	0.110731	0.0827343	1	0	-0.754141	0.00273413	1	-1	-0.86	0.000222	1	1	-0.577644	7.78737e-05	1	1	-0.696542	5.97752e-17	1	1
5	protein_coding	ENSG00000145833	DDX46	5	0	0	-5	16	8	0.595	0.007	1	1	1.16699	0.0010734	1	1	1.46	0.002547	1	-1	0.158232	0.29659	1	0	-0.0989	0.14	1	0	0.623738	0.0219953	1	-1	-0.15841	0.648196	1	0	-0.137	0.336	1	0	-0.41216	0.0228604	1	1	-0.384107	8.14375e-07	1	1
12	protein_coding	ENSG00000111364	DDX55	5	0	1	-5	13	8	---	---	0	0	1.53065	0.0011691	1	1	0.643	0.060245	1	0	-0.376623	0.0943766	1	0	---	---	0	0	0.120417	0.073335	1	0	0.75258	0.0224213	1	1	---	---	0	0	-0.226867	0.382521	1	0	-0.206297	0.235179	1	0
6	protein_coding	ENSG00000023892	DEF6	5	1	1	0	16	8	-0.0405	0.84	1	0	-1.30898	0.0009633	1	-1	-1.05	0.006488	1	1	-0.691792	1.77448e-06	1	1	-0.0393	0.578	1	0	0.0604875	0.340533	1	0	1.00532	0.0185631	1	1	-0.33	0.0144	1	1	0.174064	0.658321	1	0	0.235764	0.258691	1	0
3	protein_coding	ENSG00000174839	DENND6A	5	1	0	-1	14	8	---	---	0	0	-0.0370735	0.859869	1	0	0.24	0.329354	1	0	-0.311853	0.037256	1	1	-0.0261	0.771	1	0	-0.143988	0.112607	1	0	-0.298504	0.539966	1	0	---	---	0	0	-0.619603	0.000571813	1	1	-0.543954	3.64795e-08	1	1
17	protein_coding	ENSG00000153933	DGKE	5	0	0	-5	15	8	-0.251	0.0826	1	0	0.626401	0.0958733	1	0	0.888	0.0378	1	-1	-0.632833	0.0238974	1	1	---	---	0	0	0.0820296	0.529294	1	0	0.721622	0.0318323	1	1	-0.0491	0.729	1	0	-0.624184	0.0300126	1	1	-0.491617	0.0156088	1	1
11	protein_coding	ENSG00000172893	DHCR7	5	1	0	-7	16	8	0.476	0.0148	1	1	-0.561066	0.034544	1	-1	-0.987	0.006137	1	1	-0.944493	3.04373e-24	1	1	0.00123	0.994	1	0	-0.0995596	0.171175	1	0	0.0779782	0.858592	1	0	-0.511	0.00494	1	1	0.117748	0.465742	1	0	0.103178	0.232702	1	0
5	protein_coding	ENSG00000228716	DHFR	5	0	0	-10	9	8	---	---	0	0	---	---	0	0	---	---	0	0	-0.128123	0.726193	1	0	---	---	0	0	---	---	0	0	0.115655	0.854253	1	0	---	---	0	0	-1.09585	2.3629e-05	1	1	-1.10542	6.53103e-15	1	1
10	protein_coding	ENSG00000181192	DHTKD1	5	0	0	-6	16	8	0.486	0.0168	1	1	-1.11211	0.0050133	1	-1	0.227	0.478155	1	0	-0.392318	0.00426338	1	1	-0.14	0.188	1	0	0.0770564	0.20801	1	0	-0.497037	0.210063	1	0	-0.257	0.046	1	1	-1.15091	1.11261e-11	1	1	-1.32264	3.88988e-37	1	1
13	protein_coding	ENSG00000139734	DIAPH3	5	0	0	-15	16	8	0.254	0.0363	1	1	-1.5212	0.0005014	1	-1	-1.42	0.003446	1	1	-5.01101	0	1	1	-0.0529	0.27	1	0	0.226388	0.0262689	1	-1	-0.771814	0.0685913	1	0	-0.0887	0.561	1	0	-2.24201	2.56384e-43	1	1	-2.12345	4.01382e-126	1	1
3	protein_coding	ENSG00000075711	DLG1	5	0	1	-5	16	8	-0.228	0.139	1	0	1.1792	0.0181315	1	1	-0.938	0.03075	1	1	-0.321266	0.00209657	1	1	-0.184	0.392	1	0	0.0627164	0.411007	1	0	-0.342956	0.351286	1	0	0.339	0.041	1	-1	-0.568332	0.000257554	1	1	-0.493025	3.5536e-08	1	1
6	protein_coding	ENSG00000198719	DLL1	5	0	0	-3	11	6	---	---	0	0	-2.37089	0.0017798	1	-1	-2.72	0.003185	1	1	-2.15083	2.94597e-22	1	1	---	---	0	0	0.103546	0.140889	1	0	1.53713	0.0921907	1	0	---	---	0	0	---	---	0	0	---	---	0	0
9	protein_coding	ENSG00000086061	DNAJA1	5	0	0	3	16	8	0.536	0.00241	1	1	0.649452	0.0103189	1	1	2.39	0.001353	1	-1	-0.354768	0.00717444	1	1	-0.397	0.0163	1	1	-0.0865571	0.188812	1	0	0.196682	0.540208	1	0	0.186	0.128	1	0	-0.458026	0.00208085	1	1	-0.331532	8.46776e-06	1	1
16	protein_coding	ENSG00000103423	DNAJA3	5	0	0	-3	16	8	-0.349	0.0342	1	-1	0.299911	0.187273	1	0	0.394	0.095354	1	0	0.0712017	0.671857	1	0	-0.161	0.0494	1	1	-0.183381	0.0424714	1	1	0.153543	0.74456	1	0	0.103	0.418	1	0	-0.258909	0.16674	1	0	-0.395905	0.000604361	1	1
20	protein_coding	ENSG00000101152	DNAJC5	5	0	0	3	13	8	---	---	0	0	1.04436	0.0018364	1	1	-0.44	0.099919	1	0	-0.950497	1.02159e-25	1	1	---	---	0	0	-0.0395904	0.56273	1	0	0.677154	0.00241146	1	1	---	---	0	0	-0.508817	0.000305121	1	1	-0.445732	3.306e-08	1	1
1	protein_coding	ENSG00000067334	DNTTIP2	5	0	0	1	16	8	-0.00184	0.99	1	0	0.682392	0.0085281	1	1	0.363	0.121749	1	0	0.240353	0.0552659	1	0	-0.23	0.021	1	1	-0.0703773	0.230217	1	0	-0.0862998	0.831061	1	0	0.285	0.0434	1	-1	-0.621546	0.000386982	1	1	-0.382133	3.03384e-06	1	1
13	protein_coding	ENSG00000088387	DOCK9	5	1	0	4	16	8	0.365	0.0348	1	1	0.546869	0.046963	1	1	-1.13	0.03041	1	1	-0.762178	2.63374e-14	1	1	0.0849	0.431	1	0	-0.172824	0.0165813	1	1	0.389084	0.258583	1	0	-0.254	0.132	1	0	0.0347326	0.891514	1	0	-0.0141947	0.923053	1	0
3	protein_coding	ENSG00000154813	DPH3	5	0	0	1	13	8	---	---	0	0	0.604935	0.0216787	1	1	1.29	0.019965	1	-1	-0.47222	0.000507585	1	1	---	---	0	0	-0.657874	0.00026954	1	1	-0.0941395	0.820381	1	0	---	---	0	0	-0.514318	0.0235265	1	1	-0.441899	0.000920245	1	1
17	protein_coding	ENSG00000108591	DRG2	5	0	0	-1	15	8	-0.196	0.225	1	0	1.66098	0.0009773	1	1	-0.0382	0.89271	1	0	0.167075	0.459577	1	0	---	---	0	0	-0.197859	0.0286709	1	1	0.564423	0.0554473	1	0	-0.263	0.0419	1	1	0.360529	0.163004	1	0	0.156634	0.398791	1	0
8	protein_coding	ENSG00000136982	DSCC1	5	0	0	-12	16	8	0.953	0.00037	1	1	-0.567364	0.037267	1	-1	0.715	0.018282	1	-1	-0.812507	0.012304	1	1	-0.191	0.0524	1	0	-0.005755	0.945664	1	0	0.513402	0.146579	1	0	-0.656	0.000516	1	1	-1.57761	3.39674e-13	1	1	-1.92355	2.34866e-44	1	1
20	protein_coding	ENSG00000149636	DSN1	5	0	0	-16	16	8	0.965	0.00149	1	1	-0.973697	0.0049046	1	-1	-0.222	0.525683	1	0	-0.000174177	0.999522	1	0	-0.17	0.0719	1	0	-0.0991016	0.168973	1	0	0.318786	0.333601	1	0	-0.488	0.0254	1	1	-0.67249	0.00160617	1	1	-1.22834	8.37378e-15	1	1
6	protein_coding	ENSG00000151914	DST	5	1	1	2	16	8	0.369	0.0222	1	1	1.50139	0.000713	1	1	-2.13	0.001771	1	1	-1.39532	4.17938e-62	1	1	-1.05	4.69e-07	1	1	0.407517	0.00176338	1	-1	0.624009	0.143812	1	0	-1.35	2.46e-05	1	1	-0.625134	4.41101e-07	1	1	-0.434391	2.24818e-14	1	1
7	protein_coding	ENSG00000091073	DTX2	5	0	0	2	16	8	0.712	0.00417	1	1	1.18432	0.0073998	1	1	-0.288	0.375026	1	0	0.127598	0.513726	1	0	-0.0233	0.72	1	0	0.0665527	0.44275	1	0	1.51254	6.26012e-06	1	1	-0.0534	0.7	1	0	0.0794607	0.850677	1	0	-0.161527	0.423189	1	0
15	protein_coding	ENSG00000137857	DUOX1	5	1	1	3	15	7	0.327	0.0422	1	1	0.667036	0.0165626	1	1	-0.959	0.041787	1	1	-0.0459628	0.779234	1	0	-0.0331	0.78	1	0	-0.0320756	0.716144	1	0	4.48602	3.48493e-30	1	1	-0.573	0.00468	1	1	0.829351	0.000899805	1	-1	0.663089	6.37019e-06	1	-1
15	protein_coding	ENSG00000140254	DUOXA1	5	1	1	0	12	6	---	---	0	0	1.41723	0.0050293	1	1	-1.54	0.011483	1	1	-0.480063	0.000473021	1	1	-0.0426	0.762	1	0	0.101986	0.142793	1	0	2.19756	0.201688	1	0	---	---	0	0	0.367265	0.765001	1	0	0.312615	0.663426	1	0
11	protein_coding	ENSG00000187240	DYNC2H1	5	0	0	-1	15	8	0.00873	0.969	1	0	0.224384	0.280592	1	0	0.247	0.308609	1	0	-0.964265	7.51537e-08	1	1	---	---	0	0	0.141729	0.163713	1	0	0.906572	0.000623358	1	1	-0.0681	0.597	1	0	-0.342376	0.204546	1	0	-0.142475	0.422331	1	0
12	protein_coding	ENSG00000088986	DYNLL1	5	0	0	0	16	8	0.0107	0.962	1	0	0.444285	0.0376597	1	1	0.0636	0.801778	1	0	-0.89941	2.11492e-21	1	1	0.161	0.168	1	0	-0.39297	0.00199732	1	1	-0.267053	0.484914	1	0	0.0634	0.645	1	0	-0.00474954	0.982456	1	0	0.0660474	0.531743	1	0
3	protein_coding	ENSG00000144597	EAF1	5	0	0	5	14	8	---	---	0	0	0.265552	0.369109	1	0	-0.357	0.327374	1	0	-0.663694	1.22056e-07	1	1	-0.0407	0.501	1	0	-0.0938322	0.306264	1	0	1.17162	6.31458e-07	1	1	---	---	0	0	-1.20726	7.8991e-10	1	1	-1.02733	6.22325e-20	1	1
X	protein_coding	ENSG00000147155	EBP	5	0	0	-8	16	8	0.571	0.0098	1	1	1.5872	0.0005042	1	1	-0.593	0.118136	1	0	-0.401959	5.81775e-05	1	1	-0.0557	0.647	1	0	0.0866582	0.320517	1	0	-0.149651	0.732711	1	0	-0.746	0.00143	1	1	-0.441641	0.00362169	1	1	-0.280169	0.000779448	1	1
3	protein_coding	ENSG00000114346	ECT2	5	0	0	-14	16	8	0.478	0.348	1	0	-1.39724	0.0045396	1	-1	0.346	0.208809	1	0	-0.567064	1.66505e-05	1	1	-0.144	0.332	1	0	-0.0041092	0.95737	1	0	-0.833445	0.0695551	1	0	-1.21	0.000105	1	1	-1.69213	2.73805e-27	1	1	-1.72951	4.68851e-80	1	1
3	protein_coding	ENSG00000134109	EDEM1	5	1	1	8	16	8	-0.147	0.152	1	0	-0.748614	0.0086309	1	-1	-0.66	0.036039	1	1	-1.60313	4.69543e-64	1	1	0.0603	0.583	1	0	0.184013	0.0406116	1	-1	0.375349	0.31822	1	0	-0.651	0.000774	1	1	-1.08801	8.26554e-12	1	1	-0.724629	3.15694e-18	1	1
20	protein_coding	ENSG00000125977	EIF2S2	5	1	0	-2	16	8	-0.307	0.0204	1	-1	1.12665	0.0015336	1	1	0.538	0.072508	1	0	-0.0386104	0.840433	1	0	-0.304	0.0573	1	0	-0.252018	0.00512914	1	1	-0.341749	0.355761	1	0	-0.386	0.00787	1	1	-0.407699	0.00714168	1	1	-0.332489	0.000765086	1	1
15	protein_coding	ENSG00000104131	EIF3J	5	0	0	-4	16	8	-0.935	0.00794	1	-1	1.07503	0.0017652	1	1	0.826	0.02022	1	-1	0.0940307	0.608316	1	0	-0.828	5.27e-07	1	1	-0.283418	0.0185131	1	1	-0.38707	0.236105	1	0	-0.099	0.513	1	0	-0.397623	0.0223205	1	1	-0.205501	0.0264579	1	1
4	protein_coding	ENSG00000151247	EIF4E	5	0	0	-2	16	8	0.647	0.0501	1	0	1.36168	0.0026302	1	1	0.394	0.176989	1	0	-0.577677	7.87757e-05	1	1	-0.243	0.0403	1	1	-0.0325892	0.628362	1	0	-0.780212	0.00671688	1	-1	-0.281	0.0348	1	1	-0.314345	0.210248	1	0	-0.339029	0.0464437	1	1
10	protein_coding	ENSG00000253626	EIF5AL1	5	0	0	-2	8	8	---	---	0	0	---	---	0	0	---	---	0	0	-0.955395	1.82704e-19	1	1	---	---	0	0	---	---	0	0	0.246727	0.503307	1	0	---	---	0	0	-0.448757	0.00418935	1	1	-0.346106	0.00011449	1	1
4	protein_coding	ENSG00000170522	ELOVL6	5	1	1	-10	16	8	0.365	0.0647	1	0	1.09995	0.0020366	1	1	0.855	0.012833	1	-1	-0.225349	0.0886943	1	0	0.0431	0.841	1	0	0.14346	0.0856879	1	0	0.558247	0.0751319	1	0	-0.192	0.305	1	0	-0.396763	0.00714636	1	1	-0.355829	1.06997e-05	1	1
5	protein_coding	ENSG00000164181	ELOVL7	5	0	0	-1	13	8	---	---	0	0	1.11342	0.0017151	1	1	-2.7	0.004107	1	1	-3.31504	5.80569e-123	1	1	---	---	0	0	-0.0783573	0.335717	1	0	4.75708	4.6632e-24	1	1	---	---	0	0	-1.0745	0.000161849	1	1	-1.1097	8.49531e-11	1	1
12	protein_coding	ENSG00000126749	EMG1	5	0	0	-6	16	8	-0.41	0.00763	1	-1	1.54117	0.0006729	1	1	1.07	0.007501	1	-1	-0.006443	0.986381	1	0	-0.137	0.139	1	0	-0.21248	0.0162178	1	1	-0.372981	0.382989	1	0	-0.311	0.0194	1	1	-0.544304	0.0571673	1	0	-0.545765	0.00303787	1	1
4	protein_coding	ENSG00000145293	ENOPH1	5	0	0	-4	16	8	-0.509	0.0105	1	-1	-0.240431	0.312499	1	0	0.337	0.208087	1	0	-0.227447	0.0898301	1	0	-0.431	0.000128	1	1	-0.352854	0.00318675	1	1	-0.421021	0.233001	1	0	-0.0803	0.64	1	0	-0.93421	1.40109e-07	1	1	-1.04371	3.92347e-20	1	1
9	protein_coding	ENSG00000165689	ENTR1	5	0	0	-2	16	8	-0.781	0.00135	1	-1	0.491243	0.0302291	1	1	0.321	0.193023	1	0	-0.937537	8.07773e-09	1	1	-0.382	0.0247	1	1	-0.219031	0.0445138	1	1	0.0581947	0.919332	1	0	-0.13	0.355	1	0	0.381407	0.0490986	1	-1	0.1151	0.431775	1	0
12	protein_coding	ENSG00000183495	EP400	5	0	0	-6	16	8	-0.249	0.155	1	0	0.904278	0.0043241	1	1	0.71	0.022535	1	-1	-0.344824	0.0189667	1	1	-0.0277	0.677	1	0	-0.122261	0.0812524	1	0	0.672666	0.00848017	1	1	-0.49	0.00259	1	1	-0.107943	0.642454	1	0	-0.134715	0.259188	1	0
2	protein_coding	ENSG00000116016	EPAS1	5	1	1	14	16	8	0.259	0.297	1	0	0.900876	0.0057185	1	1	-1.67	0.004443	1	1	-0.972923	5.32138e-20	1	1	0.16	0.418	1	0	-0.566461	0.00028053	1	1	-0.495986	0.233756	1	0	-0.757	0.00105	1	1	-0.368839	0.00975229	1	1	-0.163307	0.0624346	1	0
17	protein_coding	ENSG00000049283	EPN3	5	1	1	4	14	7	0.061	0.771	1	0	1.41851	0.0006284	1	1	-0.492	0.107084	1	0	-0.122431	0.484791	1	0	---	---	0	0	-0.215616	0.0222166	1	1	3.07791	0.0359699	1	1	-0.848	0.000251	1	1	---	---	0	0	-1.43916	0.264065	1	0
8	protein_coding	ENSG00000171320	ESCO2	5	0	0	-14	13	8	---	---	0	0	-0.0443935	0.822135	1	0	0.262	0.240475	1	0	-1.16462	3.12164e-05	1	1	---	---	0	0	0.167934	0.096311	1	0	0.323914	0.337624	1	0	---	---	0	0	-1.77146	1.65866e-13	1	1	-2.02009	2.57353e-35	1	1
4	protein_coding	ENSG00000123737	EXOSC9	5	0	0	-13	15	8	0.0274	0.859	1	0	0.89722	0.0395578	1	1	0.472	0.389453	1	0	-0.14938	0.518803	1	0	---	---	0	0	0.0668812	0.420026	1	0	-0.540725	0.0637231	1	0	-0.329	0.0125	1	1	-0.29335	0.143001	1	0	-0.595058	5.1732e-07	1	1
8	protein_coding	ENSG00000170323	FABP4	5	0	0	0	11	3	0.568	0.00816	1	1	1.0946	0.0030568	1	1	-0.325	0.278899	1	0	---	---	0	0	0.0326	0.844	1	0	0.101658	0.398672	1	0	4.0185	0.0437808	1	1	0.0735	0.608	1	0	-4.5598	0.0373288	1	1	-3.53895	0.015727	1	1
11	protein_coding	ENSG00000166801	FAM111A	5	0	0	-11	16	8	0.97	0.00694	1	1	0.646797	0.0276885	1	1	1.28	0.007152	1	-1	0.406346	0.00499193	1	-1	0.091	0.267	1	0	-0.167326	0.067277	1	0	0.628619	0.0105767	1	1	-0.368	0.00833	1	1	-1.2182	2.20841e-13	1	1	-1.26527	1.25294e-43	1	1
11	protein_coding	ENSG00000189057	FAM111B	5	0	0	-13	13	8	---	---	0	0	0.404923	0.05469	1	0	0.606	0.117997	1	0	-0.715994	0.00245029	1	1	---	---	0	0	0.0948305	0.281396	1	0	1.1834	2.04467e-06	1	1	---	---	0	0	-0.318455	0.0795755	1	0	-1.71065	6.57275e-38	1	1
10	protein_coding	ENSG00000108021	FAM208B	5	1	0	-1	16	8	-0.18	0.712	1	0	1.25634	0.0008425	1	1	0.883	0.019747	1	-1	-0.0325986	0.851191	1	0	-0.105	0.286	1	0	-0.0265868	0.694608	1	0	0.737224	0.00115639	1	1	-0.0144	0.937	1	0	-0.496245	0.00148097	1	1	-0.455431	1.09379e-06	1	1
18	protein_coding	ENSG00000177150	FAM210A	5	0	0	-5	14	8	---	---	0	0	-3.31069	0.000128	1	-1	-2.19	0.002006	1	1	-2.01207	1.61668e-35	1	1	-0.123	0.0888	1	0	-0.415453	0.00496703	1	1	0.0717848	0.880874	1	0	---	---	0	0	-0.465714	0.0276341	1	1	-0.400416	0.00967815	1	1
1	protein_coding	ENSG00000188610	FAM72B	5	0	0	-6	11	8	---	---	0	0	---	---	0	0	---	---	0	0	-3.25493	1.04192e-06	1	1	---	---	0	0	0.23277	0.00731389	1	-1	-1.27532	0.171746	1	0	---	---	0	0	-2.62853	2.32211e-05	1	1	-2.27941	9.21806e-06	1	1
6	protein_coding	ENSG00000168143	FAM83B	5	1	0	-1	13	8	---	---	0	0	0.260617	0.528693	1	0	-1.52	0.018223	1	1	0.72931	5.01652e-13	1	-1	---	---	0	0	-0.202513	0.0242044	1	1	1.45968	0.179658	1	0	---	---	0	0	-0.383178	0.185977	1	0	-0.372648	0.0397765	1	1
1	protein_coding	ENSG00000182118	FAM89A	5	0	0	0	13	8	---	---	0	0	-0.491419	0.0567364	1	0	-2.15	0.002117	1	1	-0.99846	8.01855e-12	1	1	---	---	0	0	-0.171067	0.0240166	1	1	0.0475012	0.95107	1	0	---	---	0	0	-0.607921	0.0136656	1	1	-0.530217	0.00177545	1	1
9	protein_coding	ENSG00000158169	FANCC	5	0	0	-16	16	8	0.0507	0.745	1	0	0.341584	0.131865	1	0	0.615	0.047392	1	-1	-0.111362	0.70586	1	0	0.0703	0.503	1	0	-0.223142	0.0146328	1	1	0.302053	0.531286	1	0	-0.35	0.0179	1	1	-0.900619	0.000482301	1	1	-0.905342	6.36117e-07	1	1
6	protein_coding	ENSG00000112039	FANCE	5	1	1	-14	16	8	-0.207	0.293	1	0	-2.14015	0.0003238	1	-1	-2.47	0.001595	1	1	-1.09182	2.74377e-09	1	1	-0.0618	0.266	1	0	-0.134035	0.073105	1	0	0.507458	0.20728	1	0	-0.646	0.000544	1	1	-0.0388897	0.947837	1	0	-0.320206	0.410557	1	0
17	protein_coding	ENSG00000169710	FASN	5	0	1	-3	16	8	0.688	0.0111	1	1	0.783821	0.0060923	1	1	0.245	0.313477	1	0	-1.05408	2.85674e-33	1	1	0.00443	0.969	1	0	-0.944998	0.00018182	1	1	-0.0313297	0.940847	1	0	-0.281	0.0327	1	1	0.501687	0.00200626	1	-1	0.371519	1.68217e-08	1	-1
4	protein_coding	ENSG00000083857	FAT1	5	1	0	3	16	8	0.403	0.0104	1	1	0.077441	0.682878	1	0	0.435	0.071414	1	0	-0.538945	9.39253e-07	1	1	-0.0526	0.458	1	0	0.250063	0.00420941	1	-1	1.12978	0.00301466	1	1	-0.0251	0.903	1	0	-0.123971	0.507444	1	0	-0.194802	0.00306273	1	1
19	protein_coding	ENSG00000105202	FBL	5	0	0	-5	16	8	-0.412	0.0138	1	-1	-0.277559	0.295361	1	0	-0.314	0.385092	1	0	-1.21597	1.3939e-28	1	1	-0.553	6.05e-06	1	1	-0.275692	0.00262703	1	1	-0.41703	0.30921	1	0	-0.597	0.000757	1	1	0.153174	0.299946	1	0	0.197986	0.00544014	1	-1
5	protein_coding	ENSG00000138829	FBN2	5	1	1	5	15	7	0.127	0.395	1	0	-2.14933	0.0023213	1	-1	-2.43	0.005108	1	1	-3.15147	5.38187e-152	1	1	0.0312	0.697	1	0	0.292368	0.00883885	1	-1	0.64695	0.0439405	1	1	-0.805	0.00026	1	1	-0.31392	0.0621762	1	0	-0.308355	4.04532e-05	1	1
19	protein_coding	ENSG00000161243	FBXO27	5	1	1	-3	11	6	---	---	0	0	-0.104326	0.673181	1	0	-0.712	0.043609	1	1	-1.42251	4.48436e-11	1	1	---	---	0	0	-0.72222	0.00014561	1	1	0.870909	0.0571078	1	0	---	---	0	0	---	---	0	0	---	---	0	0
6	protein_coding	ENSG00000118496	FBXO30	5	0	0	-4	14	8	---	---	0	0	0.860177	0.0048586	1	1	0.508	0.058482	1	0	-0.23364	0.212324	1	0	0.024	0.88	1	0	-0.0859753	0.287858	1	0	-0.31242	0.341211	1	0	---	---	0	0	-0.568402	0.00388666	1	1	-0.503006	0.000231156	1	1
3	protein_coding	ENSG00000174013	FBXO45	5	0	0	-4	13	8	---	---	0	0	1.51348	0.0066036	1	1	-0.397	0.431955	1	0	0.245123	0.148248	1	0	---	---	0	0	-0.157224	0.19234	1	0	0.217089	0.569212	1	0	---	---	0	0	-0.525745	0.0143194	1	1	-0.321535	0.0114268	1	1
5	protein_coding	ENSG00000151422	FER	5	0	0	0	16	8	-0.3	0.104	1	0	-0.5339	0.0217314	1	-1	-0.618	0.026633	1	1	-0.136514	0.36489	1	0	-0.0899	0.0126	1	1	-0.224613	0.0162533	1	1	0.0361344	0.95635	1	0	0.19	0.197	1	0	-0.507572	0.0174282	1	1	-0.316578	0.00391771	1	1
16	protein_coding	ENSG00000135723	FHOD1	5	1	1	0	16	8	0.547	0.00978	1	1	1.37069	0.0012889	1	1	0.883	0.037835	1	-1	-0.486656	0.00159671	1	1	-0.0203	0.773	1	0	0.283825	0.0119828	1	-1	0.277476	0.397666	1	0	-0.382	0.00788	1	1	0.405604	0.082757	1	0	0.0213086	0.933542	1	0
12	protein_coding	ENSG00000004478	FKBP4	5	0	0	-5	16	8	-0.317	0.158	1	0	0.952409	0.0073776	1	1	0.376	0.110848	1	0	-0.503681	1.15747e-05	1	1	-0.0545	0.701	1	0	-0.200021	0.0206985	1	1	-0.133847	0.755188	1	0	-0.286	0.0511	1	0	-0.122001	0.520104	1	0	-0.17196	0.0668562	1	0
2	protein_coding	ENSG00000157827	FMNL2	5	0	0	-2	13	8	---	---	0	0	0.671743	0.0094915	1	1	-1.02	0.343493	1	0	-1.60184	2.75351e-42	1	1	---	---	0	0	-0.0433217	0.602435	1	0	0.725269	0.164056	1	0	---	---	0	0	-0.350621	0.0308011	1	1	-0.274685	0.00420103	1	1
X	protein_coding	ENSG00000068438	FTSJ1	5	0	0	-4	16	8	-0.808	0.00153	1	-1	1.03206	0.0074883	1	1	0.264	0.520254	1	0	-0.381391	0.00335303	1	1	-0.0301	0.867	1	0	-0.154383	0.0343618	1	1	-0.337993	0.307345	1	0	-0.0625	0.655	1	0	-0.110278	0.646889	1	0	-0.263391	0.0241101	1	1
19	protein_coding	ENSG00000174951	FUT1	5	1	1	-1	16	8	-0.396	0.0452	1	-1	0.259492	0.172682	1	0	-0.757	0.03343	1	1	-1.54762	1.6231e-10	1	1	-0.0008	0.992	1	0	0.108265	0.111743	1	0	3.36055	1.6743e-14	1	1	-0.561	0.00138	1	1	-0.988051	0.0125888	1	1	-0.652961	0.0158912	1	1
8	protein_coding	ENSG00000164930	FZD6	5	1	1	-1	16	8	-0.366	0.141	1	0	0.85006	0.0769447	1	0	0.619	0.248827	1	0	0.550418	2.96243e-06	1	-1	-0.0112	0.884	1	0	0.176815	0.0181658	1	-1	0.381035	0.293194	1	0	-0.555	0.00289	1	1	-0.481793	0.000343968	1	1	-0.462744	7.5243e-11	1	1
14	protein_coding	ENSG00000092208	GEMIN2	5	0	0	-7	15	8	-0.206	0.0879	1	0	1.33458	0.0015534	1	1	0.516	0.080936	1	0	0.157585	0.675546	1	0	---	---	0	0	0.163705	0.222367	1	0	-0.445558	0.453835	1	0	-0.286	0.0246	1	1	-0.946751	0.0072668	1	1	-0.696971	0.00952649	1	1
2	protein_coding	ENSG00000152147	GEMIN6	5	0	0	-3	16	8	0.381	0.0387	1	1	0.998135	0.0046787	1	1	0.875	0.018434	1	-1	0.316457	0.20822	1	0	-0.499	1.2e-05	1	1	-0.172611	0.0717634	1	0	-0.27789	0.553605	1	0	-0.231	0.0588	1	0	-0.807327	0.00653104	1	1	-0.384457	0.0484099	1	1
1	protein_coding	ENSG00000135821	GLUL	5	0	1	2	16	8	1.23	9.89e-05	1	1	-1.57084	0.0013578	1	-1	-1.92	0.01307	1	1	-1.16857	9.32605e-23	1	1	0.0594	0.825	1	0	-0.274368	0.037823	1	1	-0.154536	0.670603	1	0	-0.125	0.418	1	0	-0.11386	0.575129	1	0	-0.136309	0.170309	1	0
17	protein_coding	ENSG00000120063	GNA13	5	1	1	0	16	8	-0.173	0.272	1	0	-1.36487	0.0013116	1	-1	-1.03	0.006649	1	1	-1.00071	6.81734e-20	1	1	-0.0783	0.102	1	0	-0.451599	0.00190991	1	1	0.463143	0.0925493	1	0	-0.103	0.442	1	0	-0.495058	0.0022052	1	1	-0.44974	8.39466e-06	1	1
4	protein_coding	ENSG00000163281	GNPDA2	5	0	0	-3	14	8	---	---	0	0	1.08852	0.0032053	1	1	-0.31	0.272511	1	0	-0.931137	8.29448e-07	1	1	0.0471	0.364	1	0	-0.171914	0.161342	1	0	-0.214635	0.58473	1	0	---	---	0	0	-0.497769	0.0349684	1	1	-0.490475	0.000177929	1	1
10	protein_coding	ENSG00000155265	GOLGA7B	5	0	0	2	13	8	---	---	0	0	0.977959	0.0023126	1	1	-1.56	0.003631	1	1	-1.0522	2.52499e-07	1	1	---	---	0	0	0.114851	0.122529	1	0	3.88265	0.00024734	1	1	---	---	0	0	-1.04225	0.634546	1	0	-0.908942	0.369438	1	0
2	protein_coding	ENSG00000063660	GPC1	5	1	1	9	16	8	0.276	0.0381	1	1	-0.637345	0.0187799	1	-1	-0.826	0.016841	1	1	-0.717064	4.50775e-15	1	1	0.165	0.172	1	0	0.061076	0.435048	1	0	-1.17901	3.04702e-07	1	-1	0.0949	0.457	1	0	-0.0401826	0.901208	1	0	0.0458016	0.776807	1	0
1	protein_coding	ENSG00000158292	GPR153	5	1	0	3	15	8	0.524	0.013	1	1	0.470484	0.0463336	1	1	0.287	0.216812	1	0	-0.683363	3.54645e-08	1	1	---	---	0	0	0.0569692	0.348776	1	0	-0.0565284	0.921207	1	0	-0.0637	0.677	1	0	0.0502662	0.890641	1	0	-0.423334	0.00567271	1	1
1	protein_coding	ENSG00000121957	GPSM2	5	0	0	-17	16	8	-0.38	0.0586	1	0	-2.0082	0.0002914	1	-1	-0.855	0.037753	1	1	0.0115021	0.943365	1	0	0.0736	0.705	1	0	-0.358557	0.00092487	1	1	-0.458969	0.353405	1	0	-0.604	0.00153	1	1	-0.713059	3.79118e-06	1	1	-0.506357	8.49765e-10	1	1
5	protein_coding	ENSG00000198055	GRK6	5	1	1	-11	16	8	0.267	0.0858	1	0	0.831869	0.0052202	1	1	0.485	0.114747	1	0	-0.322268	0.0174649	1	1	0.0462	0.428	1	0	-0.195808	0.0352221	1	1	-0.767519	0.0059646	1	-1	-0.66	0.00109	1	1	0.2841	0.324111	1	0	-0.25326	0.184918	1	0
4	protein_coding	ENSG00000109519	GRPEL1	5	0	0	0	16	8	-0.425	0.0176	1	-1	1.41235	0.0006321	1	1	0.648	0.027709	1	-1	-1.099	1.17535e-16	1	1	-0.255	0.00725	1	1	-0.230314	0.00706746	1	1	0.0596682	0.895516	1	0	-0.073	0.572	1	0	-0.395891	0.0234798	1	1	-0.278167	0.00983486	1	1
5	protein_coding	ENSG00000164284	GRPEL2	5	0	1	-6	14	8	---	---	0	0	-1.32959	0.0016035	1	-1	-1.49	0.004066	1	1	-1.33632	1.18221e-24	1	1	-0.151	0.0975	1	0	-0.110649	0.146231	1	0	-0.123345	0.866584	1	0	---	---	0	0	-1.01557	1.53393e-07	1	1	-0.731151	3.94038e-12	1	1
19	protein_coding	ENSG00000105447	GRWD1	5	0	0	-6	16	8	-0.184	0.272	1	0	0.597194	0.0131305	1	1	0.662	0.088633	1	0	-0.303482	0.0890882	1	0	-0.0844	0.177	1	0	-0.131817	0.0830528	1	0	-0.0428251	0.927862	1	0	0.0283	0.848	1	0	-0.34876	0.0355581	1	1	-0.317119	0.00198047	1	1
7	protein_coding	ENSG00000105968	H2AFV	5	0	1	-7	16	8	-0.0443	0.819	1	0	-0.957363	0.0062289	1	-1	0.693	0.039643	1	-1	-0.675753	4.76269e-09	1	1	0.2	0.0528	1	0	-0.334694	0.00828606	1	1	-0.662528	0.0937375	1	0	-1.15	0.000147	1	1	-1.03008	2.78375e-13	1	1	-0.944044	4.29707e-39	1	1
11	protein_coding	ENSG00000188486	H2AFX	5	0	0	-15	16	8	-0.404	0.0183	1	-1	0.506341	0.0265081	1	1	0.487	0.06048	1	0	-1.35661	3.34833e-25	1	1	-0.215	0.14	1	0	-0.112987	0.0734397	1	0	-0.279046	0.579864	1	0	-1.09	3.9e-05	1	1	-0.963174	3.99607e-07	1	1	-1.34055	9.50838e-20	1	1
5	protein_coding	ENSG00000113648	H2AFY	5	1	0	0	16	8	0.101	0.538	1	0	3.16123	0.0001069	1	1	0.403	0.088205	1	0	-0.0830427	0.500832	1	0	-0.0873	0.353	1	0	-0.0948434	0.122255	1	0	0.456393	0.0774611	1	0	0.334	0.0176	1	-1	-0.281858	0.0348735	1	1	-0.372322	8.42836e-10	1	1
17	protein_coding	ENSG00000177602	HASPIN	5	0	0	-14	14	8	---	---	0	0	0.283392	0.264809	1	0	-0.131	0.743726	1	0	-2.00631	4.47129e-13	1	1	-0.0852	0.18	1	0	0.0725839	0.529415	1	0	0.0627894	0.936668	1	0	---	---	0	0	-1.17145	1.17955e-05	1	1	-2.02132	2.43791e-16	1	1
2	protein_coding	ENSG00000128708	HAT1	5	0	0	-11	16	8	0.396	0.0497	1	1	1.32841	0.0111481	1	1	1.51	0.015039	1	-1	0.270124	0.0656584	1	0	-0.315	0.138	1	0	0.0040637	0.969135	1	0	-0.603811	0.0213726	1	-1	-0.753	0.000368	1	1	-0.577172	0.00102977	1	1	-0.66554	5.46937e-14	1	1
18	protein_coding	ENSG00000152240	HAUS1	5	0	0	-9	14	8	---	---	0	0	0.815847	0.0272372	1	1	0.656	0.092861	1	0	0.146078	0.648023	1	0	-0.0061	0.945	1	0	-0.266762	0.0263336	1	1	-0.500469	0.267598	1	0	---	---	0	0	-0.393159	0.143467	1	0	-0.394741	0.0386289	1	1
15	protein_coding	ENSG00000166503	HDGFL3	5	0	0	-4	15	7	-0.273	0.0982	1	0	-1.36811	0.0011859	1	-1	-0.908	0.055288	1	0	-1.57062	8.40707e-37	1	1	-0.176	0.137	1	0	-0.294417	0.00583268	1	1	0.471709	0.0987334	1	0	-0.696	0.00134	1	1	-0.842918	4.08914e-07	1	1	-0.854615	5.67779e-17	1	1
6	protein_coding	ENSG00000184357	HIST1H1B	5	0	0	-6	13	5	0.143	0.33	1	0	-0.140991	0.66675	1	0	-0.329	0.415646	1	0	-2.3311	5.104e-75	1	1	0.0549	0.402	1	0	-0.374256	0.033022	1	1	---	---	0	0	-0.191	0.158	1	0	-2.3346	0.0109794	1	1	-3.33958	0.00567839	1	1
6	protein_coding	ENSG00000180596	HIST1H2BC	5	0	0	-2	16	8	0.528	0.00202	1	1	0.109115	0.652678	1	0	-1.45	0.004061	1	1	-0.731488	1.20254e-09	1	1	0.0667	0.551	1	0	-0.764683	0.00038985	1	1	1.04115	0.0707173	1	0	1.59	1.85e-05	1	-1	-1.19618	0.12453	1	0	-2.14814	5.1232e-05	1	1
6	protein_coding	ENSG00000277224	HIST1H2BF	5	0	0	-8	14	6	0.358	0.0225	1	1	0.435716	0.0529326	1	0	-0.751	0.028441	1	1	-1.407	2.30585e-21	1	1	0.0709	0.32	1	0	-0.297589	0.0202999	1	1	2.09174	0.145297	1	0	1.03	7.93e-05	1	-1	-1.48041	0.165275	1	0	-2.10639	0.00802981	1	1
6	protein_coding	ENSG00000273802	HIST1H2BG	5	0	0	-2	14	6	0.142	0.308	1	0	2.02861	0.0004656	1	1	-1.51	0.009361	1	1	-1.99331	1.2065e-50	1	1	0.146	0.00358	1	-1	-0.0973988	0.51535	1	0	1.79824	0.00124398	1	1	0.979	0.00084	1	-1	-1.75957	0.0431289	1	1	-2.45279	0.0103696	1	1
6	protein_coding	ENSG00000273703	HIST1H2BM	5	0	0	-7	11	4	-0.0261	0.829	1	0	0.240193	0.214943	1	0	-0.0588	0.825466	1	0	-1.83362	3.00442e-23	1	1	---	---	0	0	-0.323917	0.00994058	1	1	---	---	0	0	0.141	0.43	1	0	-1.80086	0.261735	1	0	-3.3162	0.00133303	1	1
6	protein_coding	ENSG00000273983	HIST1H3G	5	1	0	-7	12	6	0.014	0.935	1	0	0.116333	0.659594	1	0	-0.414	0.178345	1	0	-2.44357	4.82744e-78	1	1	-0.141	0.122	1	0	---	---	0	0	0.00918671	0.99699	1	0	0.0252	0.867	1	0	-2.80552	0.0324391	1	1	-3.05372	0.002349	1	1
6	protein_coding	ENSG00000197061	HIST1H4C	5	0	0	-11	13	5	-0.425	0.0597	1	0	-0.0395336	0.887752	1	0	-0.0665	0.875487	1	0	-0.369118	0.00316048	1	1	-0.189	0.285	1	0	-0.367635	0.00950472	1	1	-0.301952	0.927416	1	0	-0.176	0.184	1	0	-1.57814	0.0828645	1	0	-3.07788	0.0244069	1	1
6	protein_coding	ENSG00000010818	HIVEP2	5	1	0	-3	16	8	0.392	0.0181	1	1	-1.80983	0.0003501	1	-1	-1.57	0.002768	1	1	-1.13779	4.37912e-31	1	1	-0.00413	0.961	1	0	0.0129932	0.85439	1	0	0.95516	0.00271637	1	1	-0.542	0.00872	1	1	-0.26493	0.193173	1	0	-0.221684	0.0340548	1	1
4	protein_coding	ENSG00000164104	HMGB2	5	0	0	-14	16	8	0.258	0.0568	1	0	-1.80769	0.0004616	1	-1	-0.972	0.01021	1	1	-1.88162	2.82346e-26	1	1	0.136	0.598	1	0	-0.133153	0.118156	1	0	-0.688908	0.0572334	1	0	-1.63	5.87e-05	1	1	-1.22966	9.32934e-19	1	1	-1.40659	1.79934e-61	1	1
5	protein_coding	ENSG00000112972	HMGCS1	5	0	0	-7	15	8	2	0.000872	1	1	1.43617	0.000601	1	1	-1.51	0.002546	1	1	-1.41975	1.09864e-41	1	1	---	---	0	0	-0.364662	0.00114741	1	1	0.035657	0.936308	1	0	0.957	0.000174	1	-1	-0.477807	0.00176908	1	1	-0.239887	9.13702e-05	1	1
5	protein_coding	ENSG00000169045	HNRNPH1	5	0	1	-7	16	8	-0.636	0.0726	1	0	1.55563	0.0061203	1	1	0.555	0.089419	1	0	-0.659983	6.04159e-11	1	1	-0.252	0.00524	1	1	0.172256	0.0274787	1	-1	0.159382	0.708847	1	0	-0.624	0.000557	1	1	0.14412	0.348846	1	0	0.00322927	0.975399	1	0
X	protein_coding	ENSG00000171004	HS6ST2	5	0	0	-1	11	6	---	---	0	0	0.304399	0.124231	1	0	0.25	0.440647	1	0	-4.83308	3.2063e-08	1	1	---	---	0	0	-0.0686512	0.500577	1	0	---	---	0	0	---	---	0	0	-0.738841	0.000168469	1	1	-0.580628	2.3058e-06	1	1
10	protein_coding	ENSG00000187522	HSPA14	5	0	0	-4	16	8	0.205	0.0812	1	0	0.485994	0.029194	1	1	0.472	0.230997	1	0	0.237671	0.348674	1	0	-0.0655	0.261	1	0	-0.0692799	0.260816	1	0	-0.321544	0.49544	1	0	0.0625	0.629	1	0	-0.65288	0.00994367	1	1	-0.693777	1.78025e-05	1	1
5	protein_coding	ENSG00000170606	HSPA4	5	0	0	1	16	8	-0.183	0.586	1	0	1.49476	0.0005014	1	1	1.08	0.013385	1	-1	-0.268671	0.00579869	1	1	-0.242	0.0335	1	1	-0.118123	0.0764281	1	0	-0.126542	0.705968	1	0	0.242	0.0844	1	0	-0.298812	0.0389408	1	1	-0.175163	0.00846942	1	1
11	protein_coding	ENSG00000109971	HSPA8	5	0	0	-1	16	8	0.231	0.043	1	1	5.21716	9.81e-05	1	1	1.59	0.003185	1	-1	-0.48703	1.27405e-05	1	1	-0.316	0.133	1	0	0.317298	0.00322565	1	-1	-0.0210885	0.957596	1	0	-0.0749	0.557	1	0	-0.371841	0.00247379	1	1	-0.356805	2.29841e-11	1	1
1	protein_coding	ENSG00000169991	IFFO2	5	0	1	4	13	8	---	---	0	0	0.0294355	0.901018	1	0	-1.34	0.004455	1	1	-1.87672	3.48309e-11	1	1	---	---	0	0	0.0482714	0.549334	1	0	0.50151	0.111054	1	0	---	---	0	0	-0.475826	0.0309402	1	1	-0.460597	0.000417977	1	1
3	protein_coding	ENSG00000214706	IFRD2	5	0	0	-6	16	8	-0.793	0.000614	1	-1	1.25484	0.0018848	1	1	0.917	0.014955	1	-1	-0.51535	0.00127135	1	1	-0.2	0.119	1	0	-0.144975	0.118891	1	0	-0.556365	0.0419699	1	-1	-0.589	0.000752	1	1	-0.33414	0.0984401	1	0	-0.270364	0.0109357	1	1
3	protein_coding	ENSG00000114446	IFT57	5	0	1	-3	16	8	-0.586	0.00286	1	-1	1.5944	0.0008555	1	1	0.575	0.04716	1	-1	0.142199	0.460417	1	0	-0.221	0.00666	1	1	-0.149218	0.081364	1	0	-0.199649	0.601154	1	0	-0.388	0.0408	1	1	-0.127726	0.670003	1	0	-0.133899	0.463574	1	0
X	protein_coding	ENSG00000131724	IL13RA1	5	0	0	2	16	8	0.348	0.0214	1	1	2.90915	0.0002224	1	1	0.334	0.182306	1	0	-0.530675	0.000105715	1	1	0.125	0.0617	1	0	0.160367	0.0836926	1	0	0.839283	0.000132633	1	1	-0.158	0.275	1	0	-0.346245	0.0838151	1	0	-0.2894	0.00307899	1	1
9	protein_coding	ENSG00000137033	IL33	5	0	0	1	13	5	3.41	4.89e-05	1	1	-0.194917	0.780478	1	0	-1.14	0.052992	1	0	-3.99148	3.39371e-06	1	1	-0.0163	0.874	1	0	0.0420166	0.77911	1	0	5.81196	0.0291792	1	1	0.067	0.643	1	0	---	---	0	0	-1.39538	0.0137029	1	1
2	protein_coding	ENSG00000136688	IL36G	5	1	0	1	11	3	2.67	0.000422	1	1	1.61432	0.0008417	1	1	-4.16	0.001311	1	1	-6.21784	4.00159e-26	1	1	-0.00452	0.958	1	0	0.376917	0.00139785	1	-1	8.24334	7.7621e-07	1	1	0.158	0.26	1	0	---	---	0	0	---	---	0	0
1	protein_coding	ENSG00000160712	IL6R	5	0	1	3	16	8	-0.0359	0.934	1	0	-2.96815	0.0001254	1	-1	-1.4	0.005649	1	1	-2.11687	8.12805e-122	1	1	0.115	0.36	1	0	-0.0592993	0.451745	1	0	1.32571	0.0297805	1	1	0.703	0.000496	1	-1	-0.33916	0.135604	1	0	-0.338896	0.02878	1	1
2	protein_coding	ENSG00000136718	IMP4	5	0	0	-5	16	8	-0.688	0.035	1	-1	0.820221	0.0039456	1	1	0.66	0.022107	1	-1	-0.306958	0.06193	1	0	-0.0833	0.242	1	0	-0.405353	0.00101515	1	1	-0.194871	0.642155	1	0	-0.202	0.093	1	0	-0.138261	0.51196	1	0	-0.364891	0.000713072	1	1
18	protein_coding	ENSG00000153391	INO80C	5	0	1	3	13	8	---	---	0	0	-0.311112	0.108579	1	0	-1.09	0.007428	1	1	-1.65073	3.23781e-29	1	1	---	---	0	0	-0.115177	0.386272	1	0	0.542707	0.129542	1	0	---	---	0	0	-0.160731	0.564381	1	0	-0.0384582	0.83546	1	0
2	protein_coding	ENSG00000168918	INPP5D	5	0	0	11	14	6	-0.806	0.000362	1	-1	-1.16925	0.0028518	1	-1	-1.72	0.003129	1	1	-2.90818	1.77553e-116	1	1	-0.0513	0.36	1	0	-0.0511332	0.509662	1	0	3.23851	2.32156e-33	1	1	-0.655	0.000628	1	1	-0.346202	0.0650555	1	0	-0.0670577	0.435362	1	0
5	protein_coding	ENSG00000086200	IPO11	5	0	0	-7	14	8	---	---	0	0	0.649466	0.0221565	1	1	0.411	0.149365	1	0	-0.384045	0.0198711	1	1	-0.042	0.706	1	0	0.472668	0.00974645	1	-1	-0.188017	0.670332	1	0	---	---	0	0	-0.785497	7.49848e-05	1	1	-0.847407	8.63709e-12	1	1
11	protein_coding	ENSG00000205339	IPO7	5	0	0	-2	16	8	0.361	0.192	1	0	1.08208	0.00247	1	1	1.08	0.006106	1	-1	0.199442	0.0629393	1	0	-0.221	0.302	1	0	-0.113749	0.13399	1	0	-0.109377	0.760373	1	0	-0.479	0.00366	1	1	-0.384394	0.00515471	1	1	-0.212472	0.000650354	1	1
1	protein_coding	ENSG00000142856	ITGB3BP	5	0	0	-10	16	8	0.313	0.284	1	0	-0.908567	0.0227789	1	-1	0.234	0.530189	1	0	0.163747	0.575216	1	0	-0.0189	0.821	1	0	-0.349374	0.00513842	1	1	-0.368004	0.335307	1	0	-0.77	0.000262	1	1	-0.412327	0.159806	1	0	-0.338924	0.041976	1	1
1	protein_coding	ENSG00000163207	IVL	5	1	1	2	14	6	0.296	0.0139	1	1	2.30223	0.0003061	1	1	-0.485	0.292863	1	0	-1.24425	7.54662e-24	1	1	1.57	5.76e-05	1	-1	-1.03946	7.005e-05	1	1	3.86911	5.29623e-14	1	1	-0.264	0.146	1	0	-1.36107	0.0437729	1	1	-0.818068	0.0258467	1	1
8	protein_coding	ENSG00000104369	JPH1	5	0	0	-8	14	8	---	---	0	0	-1.29818	0.0012492	1	-1	-0.526	0.061115	1	0	-2.01883	3.70734e-13	1	1	0.00563	0.943	1	0	-0.26201	0.00684981	1	1	6.2447	1.32155e-14	1	1	---	---	0	0	-0.561836	0.0394028	1	1	-0.147561	0.629733	1	0
16	protein_coding	ENSG00000065427	KARS	5	0	0	-2	16	8	-0.457	0.00875	1	-1	1.16214	0.0013191	1	1	0.404	0.098198	1	0	-0.630057	1.69409e-10	1	1	-0.245	0.0117	1	1	-0.659811	0.00079065	1	1	-0.419975	0.121204	1	0	-0.0139	0.934	1	0	0.0218198	0.920998	1	0	-0.028048	0.787904	1	0
17	protein_coding	ENSG00000108773	KAT2A	5	1	0	0	16	8	-0.187	0.0676	1	0	0.102977	0.592063	1	0	0.336	0.170498	1	0	-0.042941	0.885379	1	0	-0.171	0.137	1	0	-0.140158	0.0492809	1	1	1.77421	1.86471e-13	1	1	-0.274	0.0386	1	1	0.831943	2.64656e-05	1	-1	0.674689	1.60033e-09	1	-1
7	protein_coding	ENSG00000170852	KBTBD2	5	0	0	-3	15	8	0.429	0.0101	1	1	-1.26575	0.0023674	1	-1	-1.53	0.004996	1	1	-0.392978	0.00280993	1	1	---	---	0	0	-0.0093978	0.910635	1	0	-0.0529032	0.905103	1	0	-0.0859	0.53	1	0	-0.762825	7.64366e-06	1	1	-0.36491	0.00012106	1	1
21	protein_coding	ENSG00000157551	KCNJ15	5	1	1	0	16	8	1.82	0.000204	1	1	-0.95931	0.0030259	1	-1	-1.6	0.002629	1	1	-1.07861	5.17756e-10	1	1	-0.15	0.00525	1	1	0.239749	0.00945693	1	-1	2.41427	0.12833	1	0	-0.0884	0.643	1	0	0.231792	0.469249	1	0	0.42273	0.0393616	1	-1
11	protein_coding	ENSG00000151364	KCTD14	5	0	0	-4	14	7	0.347	0.0742	1	0	-1.03311	0.0047748	1	-1	-0.414	0.087467	1	0	-1.74679	0.0149532	1	1	---	---	0	0	0.0120834	0.923319	1	0	0.432666	0.47182	1	0	-0.676	0.00134	1	1	-0.82069	0.0288854	1	1	-0.756972	0.00395574	1	1
19	protein_coding	ENSG00000153885	KCTD15	5	0	1	-8	16	8	-0.682	0.00529	1	-1	1.07598	0.0040465	1	1	-1.44	0.005824	1	1	-1.84328	1.01252e-29	1	1	0.0473	0.396	1	0	-0.314473	0.0324946	1	1	-2.01409	7.09497e-09	1	-1	-1.08	0.000113	1	1	-0.0973772	0.670298	1	0	-0.223545	0.123012	1	0
6	protein_coding	ENSG00000112078	KCTD20	5	0	0	-5	16	8	-0.14	0.338	1	0	-0.483739	0.0617491	1	0	0.301	0.667513	1	0	-0.0915892	0.514813	1	0	0.049	0.555	1	0	-0.347338	0.00220041	1	1	-1.08409	5.8948e-07	1	-1	-0.573	0.00281	1	1	-0.451676	0.00411715	1	1	-0.240918	0.00903056	1	1
6	protein_coding	ENSG00000137177	KIF13A	5	0	1	-3	16	8	0.233	0.0955	1	0	-0.668578	0.0618783	1	0	-1.54	0.012124	1	1	-1.10949	4.6551e-35	1	1	0.0499	0.5	1	0	-0.45019	0.00070781	1	1	0.669874	0.0247955	1	1	-0.0645	0.644	1	0	-0.333801	0.102608	1	0	-0.243554	0.058399	1	0
12	protein_coding	ENSG00000139116	KIF21A	5	0	0	2	13	8	---	---	0	0	-0.51444	0.0535328	1	0	-0.741	0.032482	1	1	-0.0283551	0.886157	1	0	---	---	0	0	-0.0368765	0.633741	1	0	2.9104	9.36223e-27	1	1	---	---	0	0	-0.212847	0.320453	1	0	-0.14631	0.263882	1	0
6	protein_coding	ENSG00000237649	KIFC1	5	0	0	-15	15	8	0.195	0.307	1	0	-0.106075	0.559169	1	0	-0.356	0.160316	1	0	-2.36322	3.89927e-57	1	1	---	---	0	0	0.407169	0.00211882	1	-1	-0.403629	0.446995	1	0	-0.439	0.00374	1	1	-1.29516	3.43932e-14	1	1	-1.81816	3.69762e-38	1	1
19	protein_coding	ENSG00000167757	KLK11	5	0	0	1	11	4	0.183	0.325	1	0	0.694929	0.0145415	1	1	-1.09	0.007974	1	1	-1.5163	1.70619e-54	1	1	---	---	0	0	-0.551171	0.00250323	1	1	---	---	0	0	-0.121	0.339	1	0	---	---	0	0	---	---	0	0
19	protein_coding	ENSG00000167759	KLK13	5	0	0	1	10	2	-0.19	0.502	1	0	3.13736	9.81e-05	1	1	-1.19	0.023101	1	1	-2.62369	1.06645e-64	1	1	0.053	0.5	1	0	-1.37602	6.551e-05	1	1	---	---	0	0	0.0552	0.735	1	0	---	---	0	0	---	---	0	0
15	protein_coding	ENSG00000128944	KNSTRN	5	0	1	-17	13	8	---	---	0	0	-0.182072	0.685913	1	0	-0.451	0.400858	1	0	-1.27584	3.33479e-19	1	1	---	---	0	0	-0.0597208	0.37115	1	0	-1.01246	0.0456117	1	-1	---	---	0	0	-1.58892	3.47612e-20	1	1	-1.7047	5.5542e-36	1	1
12	protein_coding	ENSG00000184445	KNTC1	5	0	1	-14	16	8	0.762	0.000278	1	1	-0.109827	0.576851	1	0	-0.00209	0.995433	1	0	-0.623471	0.000198101	1	1	-0.0608	0.734	1	0	0.290117	0.00420076	1	-1	-0.365846	0.360718	1	0	-0.354	0.0118	1	1	-0.850723	2.96418e-06	1	1	-1.33692	8.78241e-27	1	1
17	protein_coding	ENSG00000182481	KPNA2	5	0	0	-11	11	8	---	---	0	0	---	---	0	0	---	---	0	0	-1.45474	3.46357e-51	1	1	---	---	0	0	0.127625	0.085841	1	0	-0.486128	0.370582	1	0	---	---	0	0	-1.58875	5.7286e-43	1	1	-1.6618	1.21027e-136	1	1
17	protein_coding	ENSG00000186847	KRT14	5	1	1	1	15	7	1.9	0.000144	1	1	-0.0900039	0.625035	1	0	-0.0604	0.811626	1	0	-0.0283571	0.835208	1	0	0.309	0.257	1	0	-0.35152	0.00216862	1	1	6.20345	3.43308e-09	1	1	-0.487	0.00217	1	1	0.506632	3.45265e-05	1	-1	0.4297	9.30446e-15	1	-1
4	protein_coding	ENSG00000109270	LAMTOR3	5	0	0	-1	16	8	0.285	0.0196	1	1	0.639815	0.0157538	1	1	-1.07	0.006629	1	1	-1.04104	1.10559e-13	1	1	-0.0405	0.623	1	0	-0.993745	0.00054165	1	1	-0.0450216	0.92944	1	0	0.362	0.0523	1	0	-0.00656143	0.985824	1	0	0.0295284	0.896628	1	0
13	protein_coding	ENSG00000136167	LCP1	5	0	0	-3	15	7	0.387	0.0326	1	1	-0.18892	0.529995	1	0	0.15	0.740581	1	0	-2.11932	8.82325e-07	1	1	-0.036	0.488	1	0	0.331104	0.00691868	1	-1	7.16009	5.12816e-67	1	1	-0.0514	0.791	1	0	-1.35881	6.59627e-23	1	1	-1.36381	4.06689e-64	1	1
17	protein_coding	ENSG00000005156	LIG3	5	0	0	-4	16	8	-0.377	0.0771	1	0	1.52543	0.0014453	1	1	1.3	0.018654	1	-1	0.114457	0.505101	1	0	-0.0792	0.109	1	0	-0.286794	0.00361254	1	1	-0.240164	0.549246	1	0	-0.379	0.00645	1	1	-0.0086408	0.978222	1	0	-0.0352359	0.851352	1	0
4	protein_coding	ENSG00000189308	LIN54	5	0	0	-13	13	8	---	---	0	0	-0.678963	0.0132006	1	-1	-0.526	0.087435	1	0	-1.41564	2.35197e-19	1	1	---	---	0	0	-0.311217	0.00161675	1	1	-0.194353	0.608236	1	0	---	---	0	0	-1.29701	1.0283e-08	1	1	-1.46136	4.85857e-19	1	1
1	protein_coding	ENSG00000160789	LMNA	5	1	1	6	16	8	0.249	0.036	1	1	2.46666	0.0001684	1	1	-0.446	0.145608	1	0	-0.40988	1.80779e-05	1	1	-0.00528	0.98	1	0	-0.0221773	0.803252	1	0	-0.911154	1.34382e-05	1	-1	-0.264	0.0361	1	1	-0.469959	0.000102942	1	1	-0.273296	2.05646e-06	1	1
11	protein_coding	ENSG00000134569	LRP4	5	1	1	-2	15	8	0.0699	0.728	1	0	-1.16345	0.0026761	1	-1	-1.89	0.012921	1	1	-1.97993	5.09735e-18	1	1	---	---	0	0	0.257004	0.00465882	1	-1	0.85	0.118731	1	0	-0.245	0.0483	1	1	0.122217	0.822324	1	0	-0.267453	0.446318	1	0
14	protein_coding	ENSG00000165501	LRR1	5	0	1	-6	14	8	---	---	0	0	0.438468	0.14725	1	0	0.854	0.023068	1	-1	0.0150952	0.968851	1	0	-0.179	0.047	1	1	-0.0031622	0.977359	1	0	-0.347843	0.374729	1	0	---	---	0	0	-0.978054	1.44855e-05	1	1	-1.17091	1.07157e-12	1	1
9	protein_coding	ENSG00000136802	LRRC8A	5	0	0	1	13	8	---	---	0	0	-0.64344	0.010012	1	-1	-1.39	0.015274	1	1	-1.24685	4.97403e-42	1	1	---	---	0	0	0.0707519	0.304246	1	0	-0.118748	0.741518	1	0	---	---	0	0	-0.524138	0.00414866	1	1	-0.579587	1.31128e-06	1	1
14	protein_coding	ENSG00000213903	LTB4R	5	1	1	5	15	8	0.899	0.000646	1	1	1.37559	0.0014007	1	1	-2.3	0.001557	1	1	-3.52709	5.28413e-79	1	1	---	---	0	0	-0.222399	0.051363	1	0	1.95324	7.94934e-10	1	1	-0.577	0.000997	1	1	0.625992	0.0285254	1	-1	0.382144	0.0467214	1	-1
21	protein_coding	ENSG00000198862	LTN1	5	0	0	-3	16	8	0.44	0.168	1	0	-2.2115	0.0024815	1	-1	-1.11	0.11094	1	0	-0.536232	2.02454e-06	1	1	-0.215	0.00104	1	1	-0.259068	0.0205187	1	1	0.0455499	0.914831	1	0	-0.061	0.751	1	0	-0.599477	0.000641035	1	1	-0.430599	0.000125465	1	1
8	protein_coding	ENSG00000198042	MAK16	5	0	0	-5	16	8	-0.401	0.0104	1	-1	0.755203	0.0071635	1	1	1.02	0.008663	1	-1	-0.334581	0.152684	1	0	-0.0551	0.765	1	0	-0.362934	0.00136083	1	1	-0.407446	0.165215	1	0	-0.321	0.0721	1	0	-0.484518	0.000936467	1	1	-0.260195	0.00380431	1	1
2	protein_coding	ENSG00000091436	MAP3K20	5	0	1	-12	16	8	0.0397	0.761	1	0	-1.45888	0.0025321	1	-1	-1.51	0.004544	1	1	-1.45612	3.35842e-38	1	1	-0.888	5.48e-06	1	1	-0.264465	0.012807	1	1	-0.711356	0.0240205	1	-1	-0.615	0.000915	1	1	-0.454713	0.00305618	1	1	-0.24303	0.000452303	1	1
1	protein_coding	ENSG00000116871	MAP7D1	5	1	1	-1	16	8	0.279	0.237	1	0	1.08214	0.001411	1	1	-0.105	0.656808	1	0	-0.890528	6.89902e-20	1	1	0.0499	0.59	1	0	0.0564835	0.412105	1	0	0.155709	0.663314	1	0	-0.425	0.00941	1	1	-0.24821	0.134441	1	0	-0.318458	0.000165013	1	1
3	protein_coding	ENSG00000114738	MAPKAPK3	5	0	1	-2	16	8	-0.0919	0.447	1	0	1.16174	0.0013116	1	1	0.723	0.016268	1	-1	-0.240782	0.0229697	1	1	0.11	0.339	1	0	-0.212853	0.012389	1	1	0.559547	0.0601111	1	0	-0.267	0.0353	1	1	0.142514	0.485209	1	0	0.0604202	0.673517	1	0
5	protein_coding	ENSG00000171444	MCC	5	1	1	11	16	8	-0.3	0.174	1	0	-1.49384	0.0018137	1	-1	-0.328	0.317749	1	0	0.24241	0.0263652	1	-1	-0.0501	0.495	1	0	-0.433771	0.00055549	1	1	1.33325	2.89287e-07	1	1	-0.138	0.427	1	0	-0.322655	0.107918	1	0	-0.14201	0.245709	1	0
2	protein_coding	ENSG00000076003	MCM6	5	0	0	-16	16	8	0.683	0.000993	1	1	1.2403	0.0013692	1	1	1.83	0.001868	1	-1	-0.703757	4.51681e-06	1	1	-0.197	0.122	1	0	0.208214	0.0119092	1	-1	0.225821	0.529366	1	0	-1.12	3.41e-05	1	1	-0.451516	0.018613	1	1	-0.646971	3.73251e-12	1	1
6	protein_coding	ENSG00000137337	MDC1	5	0	1	-15	16	8	0.436	0.0112	1	1	-1.08943	0.0015173	1	-1	-0.588	0.03293	1	1	-1.364	1.86521e-16	1	1	-0.117	0.301	1	0	0.015427	0.844901	1	0	0.446174	0.191946	1	0	-0.783	0.000447	1	1	-0.0232583	0.936388	1	0	-0.17818	0.13969	1	0
14	protein_coding	ENSG00000165819	METTL3	5	0	0	-4	15	8	0.226	0.0861	1	0	0.795144	0.0045406	1	1	0.557	0.035961	1	-1	-0.414841	0.00676379	1	1	---	---	0	0	-0.0999153	0.231894	1	0	0.232524	0.516122	1	0	-0.246	0.0436	1	1	0.356689	0.08597	1	0	0.111835	0.490032	1	0
X	protein_coding	ENSG00000080561	MID2	5	0	0	2	15	7	-0.118	0.298	1	0	0.264724	0.195317	1	0	-1.12	0.00704	1	1	-0.502218	0.000876904	1	1	-0.0291	0.482	1	0	-0.568438	0.0004513	1	1	0.957994	0.00459174	1	1	0.0227	0.893	1	0	-0.58792	0.274642	1	0	-0.823356	0.023612	1	1
1	lincRNA	ENSG00000230937	MIR205HG	5	1	1	---	11	6	---	---	0	0	1.17943	0.0011689	1	1	-0.801	0.027094	1	1	-2.54081	2.50043e-103	1	1	---	---	0	0	0.168048	0.154723	1	0	---	---	0	0	---	---	0	0	0.492064	0.00025371	1	-1	0.619922	5.46082e-25	1	-1
16	protein_coding	ENSG00000168404	MLKL	5	0	0	-6	13	7	---	---	0	0	1.44436	0.0006161	1	1	0.808	0.030509	1	-1	-0.286586	0.372253	1	0	-0.197	0.00225	1	1	-0.270905	0.00254497	1	1	0.480807	0.265218	1	0	---	---	0	0	-0.331931	0.174204	1	0	-0.431919	0.0027798	1	1
17	protein_coding	ENSG00000108788	MLX	5	0	0	-4	15	8	-0.236	0.173	1	0	1.1979	0.004283	1	1	-0.658	0.029293	1	1	-0.366801	0.0261651	1	1	---	---	0	0	-0.334897	0.00150353	1	1	-0.537202	0.0425626	1	-1	-0.307	0.0227	1	1	-0.0363977	0.897355	1	0	0.0770426	0.573563	1	0
11	protein_coding	ENSG00000166670	MMP10	5	1	0	0	14	6	3.57	4.99e-06	1	1	5.2274	4.93e-05	1	1	-0.603	0.131984	1	0	-0.761844	0.111071	1	0	-0.267	0.0389	1	1	0.392241	0.00116826	1	-1	0.418215	0.842846	1	0	0.0968	0.479	1	0	0.204436	0.88271	1	0	0.00717201	0.993483	1	0
21	protein_coding	ENSG00000159256	MORC3	5	1	1	1	15	8	0.606	0.169	1	0	-1.28551	0.0012831	1	-1	-1.04	0.007352	1	1	-0.169617	0.213713	1	0	---	---	0	0	-0.264463	0.00620479	1	1	0.360204	0.216912	1	0	-0.441	0.0151	1	1	-0.236336	0.385244	1	0	-0.166048	0.203044	1	0
X	protein_coding	ENSG00000133131	MORC4	5	1	0	10	16	8	-0.93	0.000228	1	-1	0.489754	0.15306	1	0	0.429	0.294363	1	0	0.545119	4.86581e-05	1	-1	-0.137	0.258	1	0	-0.506569	0.00098572	1	1	-0.356535	0.301931	1	0	-0.83	0.000288	1	1	-0.800029	0.000554091	1	1	-0.638145	7.3367e-06	1	1
16	protein_coding	ENSG00000135698	MPHOSPH6	5	0	0	-6	16	8	0.0576	0.612	1	0	1.0084	0.0070817	1	1	-0.13	0.666409	1	0	-1.07119	6.99805e-09	1	1	0.197	0.0345	1	-1	-0.0258293	0.816631	1	0	-0.0690611	0.902425	1	0	-0.204	0.0959	1	0	-0.647903	0.0130845	1	1	-0.388302	0.00427933	1	1
7	protein_coding	ENSG00000105926	MPP6	5	0	0	-8	15	8	-0.637	0.00161	1	-1	1.39539	0.0011133	1	1	0.427	0.082425	1	0	-0.293527	0.141502	1	0	---	---	0	0	-0.39348	0.00835633	1	1	-0.734506	0.0863008	1	0	-0.38	0.00883	1	1	-0.277607	0.177022	1	0	-0.249535	0.0790113	1	0
11	protein_coding	ENSG00000179826	MRGPRX3	5	0	0	0	10	4	---	---	0	0	1.95168	0.0005747	1	1	0.0774	0.821142	1	0	-5.28747	0.00590166	1	1	0.069	0.502	1	0	-0.136263	0.497518	1	0	7.56436	6.31857e-33	1	1	---	---	0	0	-2.06034	2.35508e-05	1	1	-1.91064	1.37837e-08	1	1
4	protein_coding	ENSG00000169288	MRPL1	5	1	0	-2	14	8	---	---	0	0	0.825036	0.0043026	1	1	0.588	0.062235	1	0	0.484789	0.0149512	1	-1	-0.125	0.0473	1	1	-0.60794	0.00050014	1	1	-0.56011	0.125549	1	0	---	---	0	0	-0.313646	0.314891	1	0	-0.0310082	0.89813	1	0
8	protein_coding	ENSG00000172172	MRPL13	5	0	0	-1	16	8	-0.108	0.607	1	0	0.856008	0.0131972	1	1	0.349	0.388685	1	0	0.442021	0.00523492	1	-1	-0.226	0.0191	1	1	-0.291708	0.0112918	1	1	-0.124682	0.800353	1	0	0.0933	0.452	1	0	-0.452465	0.0073675	1	1	-0.276754	0.0055311	1	1
11	protein_coding	ENSG00000166902	MRPL16	5	0	0	-2	16	8	0.407	0.0141	1	1	0.695073	0.0125773	1	1	0.511	0.104997	1	0	0.150005	0.452303	1	0	-0.214	0.00628	1	1	-0.278847	0.0184819	1	1	-0.307302	0.362326	1	0	-0.177	0.16	1	0	-0.179129	0.406667	1	0	-0.0785765	0.577307	1	0
19	protein_coding	ENSG00000105364	MRPL4	5	1	1	-3	16	8	-0.426	0.0057	1	-1	1.76977	0.0014446	1	1	0.642	0.028343	1	-1	-0.403048	0.00351033	1	1	-0.181	0.253	1	0	-0.199107	0.0158906	1	1	-0.177233	0.65272	1	0	-0.359	0.0106	1	1	0.299616	0.11363	1	0	0.080196	0.578401	1	0
12	protein_coding	ENSG00000198015	MRPL42	5	0	0	-3	16	8	-0.368	0.00553	1	-1	0.95838	0.0163965	1	1	0.779	0.025736	1	-1	0.23758	0.0621303	1	0	-0.24	0.0103	1	1	-0.169309	0.0492523	1	1	-0.402464	0.209979	1	0	-0.56	0.00105	1	1	-0.425931	0.00606775	1	1	-0.372342	3.22071e-05	1	1
9	protein_coding	ENSG00000066697	MSANTD3	5	0	0	0	14	8	---	---	0	0	-0.951092	0.0025986	1	-1	-0.993	0.008012	1	1	-1.07835	1.25049e-17	1	1	-0.0429	0.848	1	0	-0.0431075	0.6323	1	0	0.0997058	0.793204	1	0	---	---	0	0	-0.432312	0.0537039	1	0	-0.369963	0.00604029	1	1
6	protein_coding	ENSG00000146410	MTFR2	5	0	0	-9	14	8	---	---	0	0	-1.87744	0.0008402	1	-1	-0.628	0.053068	1	0	-1.50143	0.000353903	1	1	-0.249	0.00278	1	1	0.130598	0.0738851	1	0	-0.544092	0.263624	1	0	---	---	0	0	-1.78139	3.12524e-09	1	1	-2.1112	3.58098e-17	1	1
2	protein_coding	ENSG00000059728	MXD1	5	0	1	12	16	8	-0.375	0.112	1	0	-2.03968	0.0026051	1	-1	-3.5	0.002225	1	1	-1.96536	2.19776e-51	1	1	0.107	0.138	1	0	-0.350334	0.00118914	1	1	0.989602	0.0141378	1	1	-0.0037	0.988	1	0	-0.233001	0.417915	1	0	-0.401311	0.00914511	1	1
2	protein_coding	ENSG00000128641	MYO1B	5	0	1	-2	15	8	-0.334	0.0144	1	-1	-1.41268	0.0026787	1	-1	-1.64	0.003059	1	1	-2.52858	3.01221e-149	1	1	---	---	0	0	0.175932	0.0168842	1	-1	-0.449237	0.0817437	1	0	-1.15	4.36e-05	1	1	-1.02364	2.92459e-17	1	1	-1.02534	7.93486e-59	1	1
20	protein_coding	ENSG00000173418	NAA20	5	0	1	-1	14	8	---	---	0	0	1.11323	0.0013143	1	1	0.0468	0.894793	1	0	-0.351623	0.0068785	1	1	-0.338	0.00245	1	1	-0.185143	0.0994172	1	0	-0.713507	0.00346918	1	-1	---	---	0	0	-0.579474	7.19623e-05	1	1	-0.416983	6.00579e-07	1	1
2	protein_coding	ENSG00000138386	NAB1	5	0	1	-1	16	8	0.365	0.0338	1	1	-1.62211	0.0008031	1	-1	-1.16	0.005473	1	1	-0.828016	7.75314e-09	1	1	0.149	0.0432	1	-1	-0.439754	0.00335573	1	1	0.830529	0.000603795	1	1	0.369	0.0755	1	0	0.160264	0.483685	1	0	0.180695	0.101428	1	0
12	protein_coding	ENSG00000010292	NCAPD2	5	1	0	-15	16	8	0.118	0.656	1	0	-0.507973	0.281717	1	0	-1.21	0.057118	1	0	-1.10152	2.01233e-23	1	1	-0.0192	0.799	1	0	0.011852	0.853619	1	0	-0.455051	0.450656	1	0	-1.17	0.000125	1	1	-1.12749	9.75045e-18	1	1	-1.18577	2.06217e-43	1	1
11	protein_coding	ENSG00000151503	NCAPD3	5	0	0	-16	15	8	0.521	0.00216	1	1	-0.0705329	0.787223	1	0	0.76	0.031304	1	-1	-0.484788	0.00118931	1	1	---	---	0	0	0.178447	0.031953	1	-1	0.151015	0.772956	1	0	-0.536	0.00162	1	1	-1.47064	5.0873e-26	1	1	-1.93148	9.62606e-99	1	1
2	protein_coding	ENSG00000115053	NCL	5	0	0	-4	16	8	-0.349	0.0643	1	0	0.222069	0.245911	1	0	0.688	0.019881	1	-1	-0.722741	6.36331e-15	1	1	-0.619	0.0011	1	1	0.577098	0.00107818	1	-1	0.00722616	0.986598	1	0	-0.178	0.207	1	0	-0.184014	0.195756	1	0	-0.207758	0.00059028	1	1
1	protein_coding	ENSG00000058804	NDC1	5	0	0	-14	16	8	-0.0581	0.847	1	0	-0.523658	0.128231	1	0	0.486	0.227232	1	0	-0.79451	7.28896e-11	1	1	-0.284	0.00638	1	1	0.508679	0.0006987	1	-1	-0.671412	0.0454364	1	-1	-0.519	0.00168	1	1	-1.17006	1.29436e-16	1	1	-1.25711	7.71318e-47	1	1
18	protein_coding	ENSG00000080986	NDC80	5	0	0	-18	16	8	0.315	0.0174	1	1	-1.05969	0.0069995	1	-1	-0.452	0.195049	1	0	-1.81345	7.36465e-17	1	1	-0.0785	0.624	1	0	0.130596	0.202082	1	0	-1.09265	0.0267795	1	-1	-2.08	5.46e-06	1	1	-1.71037	2.3154e-17	1	1	-2.26368	2.51113e-48	1	1
14	protein_coding	ENSG00000165795	NDRG2	5	0	0	-1	16	8	-0.114	0.436	1	0	0.615767	0.0172249	1	1	-1.37	0.024177	1	1	-2.04196	5.60994e-77	1	1	0.0329	0.61	1	0	-0.540395	0.00078298	1	1	2.47575	0.000209397	1	1	0.223	0.316	1	0	0.00669026	0.995519	1	0	0.0651765	0.915035	1	0
12	protein_coding	ENSG00000139350	NEDD1	5	0	0	-11	14	8	---	---	0	0	0.587981	0.0163789	1	1	-0.337	0.181199	1	0	-0.377668	0.0160445	1	1	-0.238	0.0196	1	1	-0.0760924	0.19909	1	0	-0.947967	1.47071e-05	1	-1	---	---	0	0	-0.929339	8.99054e-06	1	1	-0.970366	1.12861e-15	1	1
4	protein_coding	ENSG00000109674	NEIL3	5	0	0	-14	16	8	0.267	0.354	1	0	-1.14866	0.0464144	1	-1	-0.726	0.253478	1	0	-1.2641	2.27903e-05	1	1	-0.00877	0.898	1	0	0.0475099	0.542115	1	0	-0.283763	0.713757	1	0	-0.844	0.000129	1	1	-1.58456	1.43871e-09	1	1	-2.79373	3.72389e-30	1	1
1	protein_coding	ENSG00000117650	NEK2	5	0	0	-19	16	8	0.0182	0.938	1	0	-2.24594	0.0021194	1	-1	-1.96	0.009883	1	1	-2.5337	8.16053e-31	1	1	-0.00937	0.919	1	0	-0.0783589	0.243289	1	0	-1.33201	0.0228781	1	-1	-1.84	7.81e-06	1	1	-2.52022	6.90662e-40	1	1	-2.71995	2.48423e-80	1	1
20	protein_coding	ENSG00000101158	NELFCD	5	0	0	-3	15	8	-0.147	0.695	1	0	1.06274	0.005522	1	1	0.302	0.18517	1	0	-0.337971	0.00897609	1	1	---	---	0	0	-0.321237	0.00367201	1	1	-0.421943	0.141569	1	0	-0.333	0.0146	1	1	0.0857469	0.653016	1	0	0.0165381	0.893015	1	0
12	protein_coding	ENSG00000166881	NEMP1	5	1	0	-9	15	8	0.431	0.0593	1	0	-0.407889	0.191695	1	0	-0.49	0.121687	1	0	-1.67979	1.07488e-25	1	1	---	---	0	0	0.361307	0.00509068	1	-1	0.0240778	0.968345	1	0	-0.661	0.000492	1	1	-1.05893	3.44847e-07	1	1	-1.49088	4.49817e-26	1	1
1	protein_coding	ENSG00000163531	NFASC	5	1	0	-1	14	7	0.0291	0.812	1	0	-0.470937	0.0452697	1	-1	-0.606	0.027723	1	1	-3.69676	5.89706e-09	1	1	---	---	0	0	-0.250595	0.0270223	1	1	2.97502	0.00930388	1	1	-0.169	0.186	1	0	-0.499327	0.489408	1	0	-0.446624	0.357072	1	0
17	protein_coding	ENSG00000130935	NOL11	5	0	0	-3	16	8	-0.263	0.171	1	0	0.692035	0.0108697	1	1	1.06	0.006238	1	-1	-0.124088	0.515096	1	0	-0.219	0.0167	1	1	-0.101051	0.202334	1	0	0.371612	0.194639	1	0	-0.0648	0.617	1	0	-0.543039	0.00386588	1	1	-0.403126	0.000172274	1	1
20	protein_coding	ENSG00000101361	NOP56	5	0	0	-8	16	8	-0.58	0.00809	1	-1	1.56653	0.0005912	1	1	1.11	0.006943	1	-1	-0.677545	2.01026e-05	1	1	-0.766	0.000378	1	1	0.175053	0.0158035	1	-1	0.223998	0.652949	1	0	-0.0186	0.914	1	0	-0.190852	0.201762	1	0	-0.346183	8.86581e-08	1	1
2	protein_coding	ENSG00000055044	NOP58	5	0	0	-8	14	8	---	---	0	0	0.0831267	0.68868	1	0	0.981	0.009308	1	-1	0.0229024	0.916816	1	0	-0.531	0.00324	1	1	0.0169663	0.808196	1	0	-0.574875	0.0225136	1	-1	---	---	0	0	-0.321264	0.0299782	1	1	-0.349237	1.7183e-05	1	1
5	protein_coding	ENSG00000181163	NPM1	5	0	0	-3	16	8	-0.198	0.104	1	0	-1.02868	0.0019929	1	-1	-0.537	0.196128	1	0	-0.711034	1.36524e-13	1	1	-0.332	0.0796	1	0	-0.266102	0.00757565	1	1	-0.667755	0.104653	1	0	-0.471	0.00235	1	1	-0.370805	0.0920394	1	0	0.104875	0.196256	1	0
9	protein_coding	ENSG00000198435	NRARP	5	1	1	-5	9	6	---	---	0	0	---	---	0	0	---	---	0	0	-3.6785	2.81671e-69	1	1	---	---	0	0	-0.363693	0.00101475	1	1	2.03739	0.305792	1	0	---	---	0	0	---	---	0	0	---	---	0	0
1	protein_coding	ENSG00000213281	NRAS	5	0	0	-1	16	8	0.0463	0.713	1	0	-0.830446	0.0044456	1	-1	-2.2	0.002131	1	1	-2.96985	1.86179e-157	1	1	-0.15	0.153	1	0	-0.276051	0.00735787	1	1	-0.557659	0.0483506	1	-1	0.194	0.172	1	0	-0.540786	0.000358369	1	1	-0.346444	6.11359e-06	1	1
6	protein_coding	ENSG00000137404	NRM	5	1	1	-10	14	8	---	---	0	0	-0.188229	0.366481	1	0	-0.0811	0.814432	1	0	-0.454994	0.0289928	1	1	-0.151	0.0187	1	1	0.433148	0.00106146	1	-1	-0.711723	0.0556733	1	0	---	---	0	0	-0.644192	0.0301289	1	1	-0.714401	0.000453771	1	1
8	protein_coding	ENSG00000035681	NSMAF	5	0	0	-4	16	8	-0.923	0.0146	1	-1	1.437	0.0006794	1	1	0.725	0.038759	1	-1	-0.658176	3.25203e-05	1	1	-0.0566	0.745	1	0	-0.444378	0.00097908	1	1	0.240732	0.474722	1	0	-0.459	0.00697	1	1	-0.248375	0.143908	1	0	-0.27272	0.00357525	1	1
12	protein_coding	ENSG00000111696	NT5DC3	5	0	0	1	15	8	-0.2	0.13	1	0	-0.74961	0.0102226	1	-1	-0.537	0.087293	1	0	-1.70886	5.0108e-34	1	1	---	---	0	0	-0.0849967	0.186916	1	0	0.220399	0.566698	1	0	-0.117	0.621	1	0	-1.12303	2.68547e-05	1	1	-0.812522	1.26955e-05	1	1
8	protein_coding	ENSG00000120526	NUDCD1	5	0	1	-2	14	8	---	---	0	0	-0.401886	0.114641	1	0	0.131	0.661263	1	0	-0.968045	3.63402e-12	1	1	-0.146	0.0785	1	0	0.0734953	0.255773	1	0	0.00620675	0.989208	1	0	---	---	0	0	-0.783649	1.04173e-05	1	1	-0.612711	1.83119e-10	1	1
X	protein_coding	ENSG00000196368	NUDT11	5	0	0	1	14	6	0.839	0.00272	1	1	-0.606874	0.0159869	1	-1	-1.44	0.009285	1	1	-2.78205	5.92334e-15	1	1	0.0222	0.843	1	0	-0.0644034	0.633034	1	0	1.03344	0.0761752	1	0	-0.251	0.14	1	0	-0.953318	0.0213849	1	1	-0.925514	0.000805702	1	1
13	protein_coding	ENSG00000136159	NUDT15	5	0	0	-4	16	8	0.0581	0.616	1	0	-0.285249	0.143406	1	0	-0.109	0.674315	1	0	-0.342587	0.0404987	1	1	0.194	0.0841	1	0	-0.115319	0.237147	1	0	-0.360354	0.350822	1	0	-0.642	0.000972	1	1	-1.23224	1.83363e-12	1	1	-1.03414	9.97546e-34	1	1
9	protein_coding	ENSG00000095319	NUP188	5	0	0	-7	15	8	0.0619	0.731	1	0	0.276839	0.141144	1	0	0.312	0.233751	1	0	-0.423677	8.89822e-05	1	1	---	---	0	0	-0.0571656	0.520849	1	0	0.256383	0.50628	1	0	-0.276	0.057	1	0	-0.331701	0.0483972	1	1	-0.484253	1.24854e-07	1	1
2	protein_coding	ENSG00000163002	NUP35	5	0	0	-14	14	8	---	---	0	0	0.861011	0.0220489	1	1	1.53	0.004531	1	-1	0.310476	0.285131	1	0	-0.098	0.234	1	0	-0.251976	0.00577122	1	1	-0.630911	0.196234	1	0	---	---	0	0	-0.649416	0.00798007	1	1	-0.489152	0.0064811	1	1
6	protein_coding	ENSG00000120253	NUP43	5	0	0	-9	15	8	-0.158	0.431	1	0	-0.554433	0.0270486	1	-1	0.99	0.008998	1	-1	0.231131	0.111355	1	0	---	---	0	0	-0.383479	0.00135479	1	1	-0.22295	0.491232	1	0	-0.608	0.00379	1	1	-0.639802	0.000122709	1	1	-0.595529	1.66029e-08	1	1
17	protein_coding	ENSG00000125450	NUP85	5	0	0	-12	16	8	0.381	0.0103	1	1	0.360036	0.0704268	1	0	0.385	0.126886	1	0	-0.111971	0.555098	1	0	-0.0065	0.965	1	0	0.10612	0.150233	1	0	0.251684	0.48581	1	0	-0.301	0.0213	1	1	-0.254226	0.248693	1	0	-0.857916	8.91301e-13	1	1
16	protein_coding	ENSG00000102900	NUP93	5	1	1	-7	16	8	0.344	0.0932	1	0	0.821387	0.0117705	1	1	1.02	0.018223	1	-1	-0.274595	0.0323581	1	1	-0.0341	0.745	1	0	0.139391	0.0316639	1	-1	-0.194259	0.634801	1	0	-0.432	0.00537	1	1	-0.417451	0.0127785	1	1	-0.607447	4.23929e-10	1	1
11	protein_coding	ENSG00000110713	NUP98	5	0	0	-10	16	8	0.319	0.0174	1	1	0.755662	0.0051906	1	1	2.07	0.001562	1	-1	-0.14605	0.220332	1	0	-0.179	0.117	1	0	-0.0828098	0.209385	1	0	-0.0210098	0.969411	1	0	-0.752	0.000316	1	1	-0.358493	0.0108549	1	1	-0.406703	3.5536e-08	1	1
15	protein_coding	ENSG00000104147	OIP5	5	0	0	-14	16	8	-0.148	0.341	1	0	0.296411	0.31706	1	0	0.778	0.056733	1	0	-0.651405	0.0767269	1	0	-0.0127	0.922	1	0	-0.120251	0.090191	1	0	-1.12554	0.052293	1	0	-1.12	6.62e-05	1	1	-1.67651	0.000104931	1	1	-1.75657	1.22594e-06	1	1
8	protein_coding	ENSG00000164830	OXR1	5	0	0	-3	16	8	0.132	0.732	1	0	-1.19589	0.0016804	1	-1	-1.23	0.005327	1	1	-0.395244	0.000804258	1	1	0.0457	0.517	1	0	-0.272829	0.00299185	1	1	0.0107226	0.986102	1	0	0.307	0.0444	1	-1	-0.448287	0.0206891	1	1	-0.477991	2.82418e-05	1	1
3	protein_coding	ENSG00000172939	OXSR1	5	0	0	0	16	8	-0.24	0.242	1	0	-0.423446	0.089959	1	0	-0.45	0.129756	1	0	-0.855072	1.40637e-17	1	1	0.0435	0.637	1	0	-0.388382	0.00145361	1	1	0.272919	0.362391	1	0	0.266	0.121	1	0	-0.150125	0.505388	1	0	0.0121955	0.934225	1	0
15	protein_coding	ENSG00000137843	PAK6	5	1	0	2	16	8	0.0924	0.731	1	0	0.896677	0.0052705	1	1	1.14	0.008626	1	-1	0.728382	0.000334258	1	-1	0.176	0.00104	1	-1	-0.59453	0.00040724	1	1	2.18267	0.150344	1	0	-0.644	0.00121	1	1	0.225081	0.685349	1	0	0.360573	0.213256	1	0
11	protein_coding	ENSG00000110218	PANX1	5	0	0	1	16	8	0.65	0.00106	1	1	-0.0356479	0.942712	1	0	-0.0656	0.918902	1	0	-0.697865	6.46562e-10	1	1	0.0452	0.672	1	0	0.517345	0.00095318	1	-1	0.923512	0.00144893	1	1	-0.314	0.0197	1	1	-0.515003	0.003004	1	1	-0.567723	5.11207e-08	1	1
11	protein_coding	ENSG00000173599	PC	5	0	0	2	16	8	0.511	0.0205	1	1	-1.65454	0.0004689	1	-1	-1.3	0.003363	1	1	-1.40256	2.27985e-28	1	1	0.151	0.015	1	-1	0.155423	0.118142	1	0	0.694864	0.0330256	1	1	0.601	0.00077	1	-1	0.417645	0.109858	1	0	0.163719	0.361211	1	0
2	protein_coding	ENSG00000169564	PCBP1	5	0	0	-3	16	8	0.144	0.53	1	0	0.934624	0.0024974	1	1	-0.398	0.308803	1	0	-1.57704	1.23855e-44	1	1	0.0711	0.547	1	0	-0.33533	0.00136073	1	1	-0.267463	0.350765	1	0	0.0741	0.598	1	0	-0.148641	0.40023	1	0	-0.249383	0.00111828	1	1
15	protein_coding	ENSG00000166803	PCLAF	5	0	0	-10	15	8	0.875	0.000368	1	1	-0.808118	0.007668	1	-1	-0.569	0.172502	1	0	-1.03525	0.00028942	1	1	---	---	0	0	1.05476	0.00047446	1	-1	-0.689351	0.0126013	1	-1	-1.34	2.16e-05	1	1	-1.41991	4.12398e-08	1	1	-1.66534	1.06587e-20	1	1
16	protein_coding	ENSG00000172840	PDP2	5	0	0	-2	13	8	---	---	0	0	-0.401261	0.0730753	1	0	-0.106	0.649789	1	0	-0.136922	0.574655	1	0	---	---	0	0	-0.48793	0.00208556	1	1	-0.709234	0.0979357	1	0	---	---	0	0	-0.489218	0.0246771	1	1	-0.48949	0.000882767	1	1
4	protein_coding	ENSG00000121892	PDS5A	5	0	0	-11	15	8	-0.3	0.0489	1	-1	-0.703107	0.101574	1	0	0.84	0.108836	1	0	-0.136515	0.255159	1	0	---	---	0	0	-0.154303	0.0324946	1	1	0.0495842	0.92778	1	0	-0.298	0.0263	1	1	-0.592386	2.15311e-05	1	1	-0.660579	8.02711e-19	1	1
5	protein_coding	ENSG00000133401	PDZD2	5	0	1	-4	14	7	0.546	0.00137	1	1	-2.47959	0.0002675	1	-1	-2.05	0.002266	1	1	-1.29731	1.04014e-34	1	1	---	---	0	0	-0.291419	0.00316235	1	1	5.06018	1.35919e-14	1	1	0.203	0.292	1	0	-0.13602	0.637767	1	0	-0.00417215	0.98529	1	0
1	protein_coding	ENSG00000187800	PEAR1	5	1	1	1	12	7	---	---	0	0	-0.0566146	0.780409	1	0	-0.36	0.317711	1	0	-1.82708	2.78277e-06	1	1	---	---	0	0	0.106224	0.240284	1	0	0.696222	0.00535581	1	1	---	---	0	0	-0.722639	0.116723	1	0	-1.18714	1.57105e-07	1	1
1	protein_coding	ENSG00000162517	PEF1	5	1	0	0	16	8	-0.134	0.372	1	0	0.570788	0.0194431	1	1	-0.153	0.521251	1	0	0.0376527	0.84783	1	0	0.102	0.299	1	0	-0.478482	0.00235419	1	1	0.0408859	0.927862	1	0	-0.287	0.0389	1	1	-0.0284653	0.928293	1	0	-0.0128096	0.947732	1	0
14	protein_coding	ENSG00000119630	PGF	5	1	0	12	16	8	0.895	0.00584	1	1	-1.66759	0.0003914	1	-1	-3.01	0.001311	1	1	-3.11706	1.12754e-98	1	1	-0.0599	0.437	1	0	0.180289	0.0866033	1	0	1.02764	0.0298438	1	1	0.188	0.137	1	0	-1.07302	0.221618	1	0	-0.477125	0.0394437	1	1
20	protein_coding	ENSG00000124102	PI3	5	0	0	3	14	7	2.9	4.38e-05	1	1	0.495765	0.0426796	1	1	-5.2	0.002203	1	1	-4.87077	0	1	1	---	---	0	0	1.59344	0.00022711	1	-1	7.27106	0.000256966	1	1	0.566	0.00135	1	-1	-0.723351	0.000592853	1	1	-1.03182	6.64293e-18	1	1
1	protein_coding	ENSG00000131788	PIAS3	5	1	1	2	16	8	0.532	0.00233	1	1	-0.183333	0.329209	1	0	-0.318	0.211984	1	0	-0.691399	9.66111e-08	1	1	-0.0524	0.341	1	0	-0.016881	0.814488	1	0	0.627865	0.0151867	1	1	-0.249	0.0424	1	1	0.0164347	0.955482	1	0	-0.0873946	0.576819	1	0
15	protein_coding	ENSG00000140451	PIF1	5	0	0	-14	13	8	---	---	0	0	0.306427	0.169764	1	0	-0.349	0.327262	1	0	-2.35961	3.63883e-11	1	1	---	---	0	0	0.113351	0.0764356	1	0	-0.406033	0.577317	1	0	---	---	0	0	-1.71483	2.39058e-07	1	1	-2.61628	8.61471e-19	1	1
17	protein_coding	ENSG00000129195	PIMREG	5	0	0	-17	16	8	0.076	0.548	1	0	-0.831786	0.0067308	1	-1	-0.502	0.112384	1	0	-1.67701	9.81802e-11	1	1	-0.137	0.00708	1	1	-0.185776	0.0375202	1	1	-1.28298	0.00836897	1	-1	-1.23	2.21e-05	1	1	-1.91559	7.58037e-10	1	1	-2.34586	1.5581e-18	1	1
X	protein_coding	ENSG00000087842	PIR	5	0	1	-3	16	8	-0.407	0.0133	1	-1	1.12578	0.0135673	1	1	-1.85	0.007953	1	1	0.311991	0.240103	1	0	-0.222	0.124	1	0	-0.673079	0.00041477	1	1	-1.29673	0.0938616	1	0	-0.53	0.00474	1	1	0.391197	0.116061	1	0	0.623827	9.38646e-07	1	-1
1	protein_coding	ENSG00000057757	PITHD1	5	0	0	-4	14	8	---	---	0	0	0.530778	0.0858703	1	0	0.405	0.10673	1	0	0.684322	8.9764e-10	1	-1	-0.194	0.0133	1	1	-0.690106	0.00036668	1	1	0.182086	0.70774	1	0	---	---	0	0	-0.543688	0.0036435	1	1	-0.388637	0.00130805	1	1
16	protein_coding	ENSG00000127564	PKMYT1	5	0	0	-13	16	8	0.23	0.0327	1	1	-0.310867	0.146678	1	0	-0.0526	0.88177	1	0	-2.32624	1.14288e-45	1	1	-0.0922	0.35	1	0	0.569917	0.00116132	1	-1	-0.562893	0.0431684	1	-1	-1.01	0.000113	1	1	-0.850889	7.91399e-05	1	1	-1.45231	1.18593e-21	1	1
20	protein_coding	ENSG00000126003	PLAGL2	5	0	1	-4	15	8	0.0747	0.488	1	0	-0.856386	0.0047963	1	-1	-1.15	0.015839	1	1	-0.410291	0.00226283	1	1	---	---	0	0	-0.243411	0.0145572	1	1	0.930903	0.0029848	1	1	-0.298	0.0736	1	0	-0.107185	0.687662	1	0	-0.219874	0.120241	1	0
2	protein_coding	ENSG00000115762	PLEKHB2	5	0	0	0	16	8	-0.0466	0.716	1	0	1.26477	0.0011508	1	1	1.06	0.010498	1	-1	-0.400023	1.8952e-05	1	1	-0.241	0.00457	1	1	-0.258016	0.0055364	1	1	0.218174	0.453714	1	0	0.204	0.105	1	0	-0.411759	0.00507181	1	1	-0.348087	2.62318e-05	1	1
X	protein_coding	ENSG00000102024	PLS3	5	1	0	-1	16	8	0.49	0.00714	1	1	-0.419568	0.0458287	1	-1	-0.249	0.274311	1	0	-0.352525	7.0386e-05	1	1	-0.0429	0.822	1	0	-0.144072	0.0662407	1	0	-0.342951	0.289002	1	0	-0.15	0.3	1	0	-0.471937	0.00115464	1	1	-0.321193	2.21381e-07	1	1
2	protein_coding	ENSG00000115946	PNO1	5	0	0	-2	16	8	-0.782	0.00176	1	-1	2.3441	0.0004023	1	1	2.08	0.00205	1	-1	-0.0764628	0.798382	1	0	-0.345	0.0672	1	0	-0.457301	0.00209153	1	1	-0.316655	0.362693	1	0	-0.223	0.0694	1	0	-0.68081	0.000183173	1	1	-0.523298	1.15075e-05	1	1
2	protein_coding	ENSG00000138035	PNPT1	5	0	0	-9	14	8	---	---	0	0	1.48661	0.001203	1	1	2.31	0.001868	1	-1	0.293122	0.0784635	1	0	-0.47	0.003	1	1	0.311694	0.00188152	1	-1	0.105145	0.831224	1	0	---	---	0	0	-0.509044	0.00197669	1	1	-0.42056	2.55397e-05	1	1
6	protein_coding	ENSG00000171453	POLR1C	5	0	0	-1	15	8	-0.648	0.00502	1	-1	1.56657	0.0048667	1	1	0.675	0.02157	1	-1	-0.122521	0.672388	1	0	---	---	0	0	-0.359189	0.00404657	1	1	0.669336	0.11844	1	0	-0.278	0.0362	1	1	0.0640699	0.859924	1	0	0.0822028	0.734572	1	0
11	protein_coding	ENSG00000168002	POLR2G	5	0	0	-1	16	8	-0.189	0.101	1	0	0.334187	0.172523	1	0	0.399	0.189485	1	0	-0.161158	0.342734	1	0	0.0395	0.634	1	0	-0.493846	0.00199854	1	1	-0.54911	0.0970903	1	0	-0.375	0.00671	1	1	-0.429392	0.0127781	1	1	-0.220534	0.0413989	1	1
16	protein_coding	ENSG00000161980	POLR3K	5	0	0	-13	16	8	-0.51	0.0974	1	0	2.49416	0.0009817	1	1	2.51	0.003185	1	-1	0.585127	0.0911395	1	0	-0.199	0.0034	1	1	0.0296735	0.633891	1	0	-0.125372	0.819706	1	0	-0.298	0.0238	1	1	-0.75509	0.00549267	1	1	-0.686197	0.000920462	1	1
X	protein_coding	ENSG00000102312	PORCN	5	1	0	9	16	8	-0.411	0.135	1	0	-0.13873	0.533189	1	0	-0.692	0.07197	1	0	-1.76528	3.52614e-24	1	1	-0.0131	0.834	1	0	0.112885	0.126929	1	0	2.56311	6.17037e-23	1	1	0.135	0.332	1	0	0.215669	0.560555	1	0	0.24774	0.281878	1	0
1	protein_coding	ENSG00000171960	PPIH	5	0	0	-5	16	8	0.302	0.118	1	0	-1.08039	0.002899	1	-1	-0.113	0.71374	1	0	0.127912	0.648567	1	0	-0.135	0.0772	1	0	-0.19396	0.0282285	1	1	-0.335872	0.481639	1	0	-0.269	0.0388	1	1	-0.380356	0.211794	1	0	-0.636175	0.000983625	1	1
14	protein_coding	ENSG00000100614	PPM1A	5	0	1	10	16	8	-0.478	0.0158	1	-1	-1.69846	0.000511	1	-1	-1.74	0.012318	1	1	-0.874348	5.24552e-16	1	1	0.00215	0.979	1	0	-0.512735	0.00132719	1	1	0.629945	0.008715	1	1	-0.555	0.00102	1	1	-0.407361	0.0374664	1	1	-0.310814	0.00717854	1	1
11	protein_coding	ENSG00000019485	PRDM11	5	1	0	1	15	8	-0.046	0.743	1	0	0.397692	0.0716097	1	0	0.94	0.007637	1	-1	0.257088	0.273132	1	0	---	---	0	0	-0.217057	0.00839036	1	1	1.02122	0.00158153	1	1	-0.13	0.346	1	0	-0.586511	0.377162	1	0	-0.072979	0.893847	1	0
20	protein_coding	ENSG00000101166	PRELID3B	5	0	1	-1	16	8	-0.51	0.112	1	0	-0.328642	0.206356	1	0	0.518	0.246709	1	0	-0.37646	0.000896776	1	1	-0.987	9.21e-07	1	1	-0.377582	0.00222171	1	1	-0.733607	0.00405893	1	-1	-0.0667	0.787	1	0	-0.389333	0.0182404	1	1	-0.264563	0.000635511	1	1
6	protein_coding	ENSG00000085377	PREP	5	0	1	-2	16	8	0.398	0.00374	1	1	0.488897	0.0330797	1	1	0.269	0.278091	1	0	-0.332084	0.011009	1	1	-0.262	0.00522	1	1	-0.0909267	0.217126	1	0	0.0961482	0.827441	1	0	-0.147	0.248	1	0	-0.21871	0.245566	1	0	-0.178167	0.0893964	1	0
12	protein_coding	ENSG00000198056	PRIM1	5	0	0	-16	15	8	-0.0104	0.965	1	0	0.0195514	0.939602	1	0	0.08	0.799629	1	0	-0.756966	0.0397753	1	1	---	---	0	0	-0.0090126	0.913019	1	0	-0.336666	0.481639	1	0	-0.899	0.000279	1	1	-1.01877	0.000728872	1	1	-1.09262	4.94477e-08	1	1
19	protein_coding	ENSG00000072062	PRKACA	5	0	1	5	16	8	0.159	0.371	1	0	0.472902	0.0667112	1	0	0.302	0.237116	1	0	-0.397878	0.00148486	1	1	0.0562	0.41	1	0	-0.409226	0.00176884	1	1	0.866091	0.00507507	1	1	-0.523	0.00474	1	1	-0.0314449	0.908225	1	0	-0.0782829	0.567324	1	0
8	protein_coding	ENSG00000253729	PRKDC	5	0	0	-10	16	8	-0.536	0.00261	1	-1	2.60193	0.0001358	1	1	0.802	0.036933	1	-1	-0.830453	2.96752e-12	1	1	-0.23	0.222	1	0	0.10326	0.124793	1	0	0.519495	0.157288	1	0	-0.341	0.0168	1	1	-0.441423	0.000761828	1	1	-0.475999	4.35587e-18	1	1
X	protein_coding	ENSG00000183943	PRKX	5	0	0	16	16	8	-0.373	0.0758	1	0	-0.701024	0.0718362	1	0	0.661	0.230268	1	0	-0.00485689	0.983257	1	0	0.0194	0.732	1	0	-0.183538	0.0174825	1	1	1.54513	1.67198e-08	1	1	0.0328	0.9	1	0	0.0546361	0.844617	1	0	0.150882	0.168168	1	0
9	protein_coding	ENSG00000136875	PRPF4	5	0	1	-11	16	8	-0.286	0.553	1	0	1.54443	0.0012893	1	1	0.555	0.040628	1	-1	-0.0549222	0.797595	1	0	-0.351	3.59e-05	1	1	-0.0396893	0.536753	1	0	0.0292712	0.947623	1	0	0.0993	0.415	1	0	-0.454569	0.00749656	1	1	-0.515486	7.79221e-06	1	1
6	protein_coding	ENSG00000204469	PRRC2A	5	1	1	-2	16	8	-0.207	0.217	1	0	0.32696	0.0965809	1	0	0.21	0.372281	1	0	-0.358528	9.13578e-05	1	1	0.00828	0.898	1	0	0.0454746	0.734014	1	0	0.214865	0.529832	1	0	-0.297	0.0197	1	1	-0.365437	0.0126302	1	1	-0.389686	7.52726e-08	1	1
9	protein_coding	ENSG00000135069	PSAT1	5	0	0	-3	16	8	-1.08	0.00217	1	-1	-1.19959	0.0043713	1	-1	0.961	0.098459	1	0	-0.714995	8.70955e-06	1	1	-0.664	0.00471	1	1	-0.312395	0.00264792	1	1	-0.722161	0.0715708	1	0	-1.72	3.87e-05	1	1	-0.347899	0.0774282	1	0	-0.228869	0.0589178	1	0
9	protein_coding	ENSG00000164985	PSIP1	5	0	0	-12	16	8	-0.295	0.314	1	0	0.423199	0.254026	1	0	0.712	0.022628	1	-1	-0.515176	0.00352448	1	1	-0.115	0.138	1	0	0.223547	0.126806	1	0	-0.29276	0.322562	1	0	-1.08	0.000141	1	1	-0.568209	0.00343904	1	1	-0.712706	4.49537e-10	1	1
11	protein_coding	ENSG00000165916	PSMC3	5	0	0	-3	16	8	-0.462	0.241	1	0	4.00483	5.36e-05	1	1	0.388	0.315178	1	0	-0.0290739	0.862932	1	0	-0.182	0.00357	1	1	-0.065605	0.488361	1	0	-0.469701	0.0664623	1	0	-0.122	0.342	1	0	-0.51668	0.000107961	1	1	-0.645208	7.53234e-21	1	1
2	protein_coding	ENSG00000173692	PSMD1	5	0	0	0	16	8	0.129	0.566	1	0	1.38855	0.0006284	1	1	0.498	0.089001	1	0	-0.28123	0.00630208	1	1	-0.0649	0.644	1	0	0.0637715	0.418536	1	0	-0.512311	0.051449	1	0	0.169	0.161	1	0	-0.591066	9.14885e-05	1	1	-0.458113	4.17109e-11	1	1
19	protein_coding	ENSG00000011304	PTBP1	5	0	0	-8	16	8	-0.0843	0.474	1	0	-0.391798	0.0623911	1	0	-1.08	0.05002	1	0	-0.994663	3.41617e-29	1	1	-0.0409	0.768	1	0	-0.0508551	0.390364	1	0	-0.174691	0.575352	1	0	-0.637	0.00052	1	1	-0.179125	0.22159	1	0	-0.319746	1.06939e-05	1	1
7	protein_coding	ENSG00000127947	PTPN12	5	0	0	-4	16	8	0.126	0.555	1	0	1.2388	0.0070789	1	1	-0.674	0.023333	1	1	-0.86702	3.80353e-13	1	1	-0.35	0.00908	1	1	-0.0892265	0.376867	1	0	-0.0165912	0.972378	1	0	0.161	0.184	1	0	-0.241561	0.149389	1	0	-0.167543	0.0309093	1	1
7	protein_coding	ENSG00000106278	PTPRZ1	5	0	1	0	15	7	-0.115	0.808	1	0	0.173747	0.442785	1	0	-0.787	0.02112	1	1	-1.89346	2.33088e-44	1	1	0.0324	0.774	1	0	-1.58247	7.005e-05	1	1	5.30566	0.0838512	1	0	-0.989	8.03e-05	1	1	-0.310466	0.145156	1	0	-0.281368	0.033166	1	1
11	protein_coding	ENSG00000150787	PTS	5	0	0	4	16	8	0.233	0.058	1	0	1.01685	0.0022272	1	1	0.241	0.313989	1	0	0.168534	0.441483	1	0	-0.0283	0.79	1	0	-0.544511	0.00053318	1	1	-0.300861	0.332033	1	0	-0.699	0.000412	1	1	-0.76979	8.91333e-05	1	1	-0.645973	6.89473e-07	1	1
2	protein_coding	ENSG00000055917	PUM2	5	1	1	-3	16	8	-0.144	0.164	1	0	-0.761282	0.0059117	1	-1	-0.718	0.022839	1	1	-0.666722	6.33969e-09	1	1	0.0463	0.861	1	0	-0.407077	0.00088533	1	1	0.212069	0.488386	1	0	0.0509	0.763	1	0	-0.38718	0.0153237	1	1	-0.268489	0.00221152	1	1
7	protein_coding	ENSG00000091127	PUS7	5	0	0	-8	15	8	-0.577	0.00367	1	-1	0.803753	0.0041109	1	1	1.64	0.002547	1	-1	-0.822805	4.13084e-06	1	1	---	---	0	0	-0.291261	0.00793197	1	1	-0.203135	0.687513	1	0	-0.128	0.366	1	0	-0.257401	0.128959	1	0	-0.279574	0.00299357	1	1
19	protein_coding	ENSG00000073008	PVR	5	0	0	-2	15	8	-0.914	0.00764	1	-1	0.398439	0.0710587	1	0	-0.448	0.07882	1	0	-1.21157	1.09287e-27	1	1	---	---	0	0	0.594449	0.0003735	1	-1	1.01204	1.24148e-06	1	1	-0.834	0.000221	1	1	-0.453001	0.00257079	1	1	-0.323072	0.000408999	1	1
1	protein_coding	ENSG00000143811	PYCR2	5	1	1	0	14	8	---	---	0	0	1.47281	0.0018181	1	1	0.203	0.361193	1	0	-0.855203	4.13126e-05	1	1	-0.239	1.85e-05	1	1	-0.243485	0.0177521	1	1	0.580722	0.0283206	1	1	---	---	0	0	0.0296315	0.921371	1	0	0.00875541	0.960615	1	0
14	protein_coding	ENSG00000100504	PYGL	5	0	1	7	16	8	0.386	0.0105	1	1	-0.815653	0.0349361	1	-1	-1.33	0.004207	1	1	-1.75423	6.47705e-77	1	1	-0.229	0.0648	1	0	-0.240967	0.00459413	1	1	0.716707	0.00249183	1	1	-0.549	0.00208	1	1	-0.0938081	0.590028	1	0	-0.0977787	0.198862	1	0
12	protein_coding	ENSG00000080371	RAB21	5	0	0	4	15	8	-0.139	0.206	1	0	-1.00945	0.0268392	1	-1	-0.397	0.257508	1	0	-0.422613	0.000111239	1	1	---	---	0	0	-0.324854	0.0151261	1	1	0.504952	0.0477301	1	1	0.313	0.0211	1	-1	-0.535537	0.00307684	1	1	-0.331694	0.00179633	1	1
1	protein_coding	ENSG00000137955	RABGGTB	5	0	0	-2	16	8	0.0965	0.764	1	0	-1.77491	0.0005544	1	-1	0.293	0.276005	1	0	-0.295651	0.0455987	1	1	-0.587	0.000578	1	1	0.445573	0.00138309	1	-1	-0.347796	0.405618	1	0	-0.236	0.117	1	0	-0.367716	0.0383428	1	1	-0.23478	0.0223814	1	1
5	protein_coding	ENSG00000039560	RAI14	5	0	0	-8	16	8	0.386	0.0436	1	1	0.803582	0.0084166	1	1	0.724	0.027785	1	-1	-0.123416	0.436932	1	0	-0.102	0.302	1	0	0.122587	0.128148	1	0	-0.140091	0.726947	1	0	-0.27	0.22	1	0	-0.207118	0.236325	1	0	-0.126547	0.243237	1	0
12	protein_coding	ENSG00000132341	RAN	5	0	0	-7	16	8	-0.71	0.000755	1	-1	-0.289063	0.13367	1	0	0.706	0.022276	1	-1	-0.436515	4.00081e-06	1	1	-0.246	0.076	1	0	-0.188348	0.0135826	1	1	0.0675998	0.878604	1	0	-0.339	0.015	1	1	-0.556848	2.68547e-05	1	1	-0.386723	2.78798e-09	1	1
18	protein_coding	ENSG00000101773	RBBP8	5	1	1	-13	16	8	-0.123	0.527	1	0	-0.130349	0.548299	1	0	0.221	0.42874	1	0	0.045729	0.789939	1	0	-0.283	0.00208	1	1	-0.155562	0.0277369	1	1	0.301363	0.346653	1	0	-0.502	0.00305	1	1	-0.0948041	0.712408	1	0	-0.128252	0.268968	1	0
8	protein_coding	ENSG00000008853	RHOBTB2	5	1	0	-4	16	8	0.637	0.00371	1	1	-0.0660281	0.741306	1	0	0.172	0.663113	1	0	-0.331684	0.132635	1	0	0.00515	0.939	1	0	-0.312441	0.00472074	1	1	-0.37418	0.282354	1	0	-0.459	0.00403	1	1	-0.118246	0.594226	1	0	0.157722	0.334582	1	0
8	protein_coding	ENSG00000176406	RIMS2	5	1	0	2	15	7	0.325	0.0394	1	1	0.453595	0.039901	1	1	-0.202	0.389116	1	0	-1.99039	0.0321364	1	1	0.02	0.681	1	0	0.0673913	0.616994	1	0	1.91079	9.38712e-06	1	1	-0.129	0.32	1	0	-1.81503	0.0534897	1	0	-1.592	0.00265476	1	1
3	protein_coding	ENSG00000170854	RIOX2	5	0	0	-2	16	8	-1.19	8.41e-05	1	-1	2.15929	0.0008059	1	1	0.953	0.01564	1	-1	0.258385	0.255374	1	0	-0.164	0.0369	1	1	-0.363943	0.00145918	1	1	-0.338832	0.329946	1	0	-0.297	0.0296	1	1	-0.175199	0.390599	1	0	0.0279919	0.86215	1	0
9	protein_coding	ENSG00000178966	RMI1	5	0	0	-15	16	8	0.244	0.285	1	0	-1.2334	0.0138116	1	-1	-0.424	0.161291	1	0	-0.689278	0.0482775	1	1	-0.199	0.26	1	0	-0.122303	0.0970893	1	0	0.0561783	0.906385	1	0	-0.572	0.00883	1	1	-0.884461	0.000137905	1	1	-1.25302	1.10276e-11	1	1
6	protein_coding	ENSG00000137393	RNF144B	5	1	0	11	13	8	---	---	0	0	-2.27929	0.0001775	1	-1	-2.28	0.001595	1	1	-1.02586	1.90535e-21	1	1	---	---	0	0	-0.637694	0.00019021	1	1	0.895011	0.00229354	1	1	---	---	0	0	0.302464	0.143266	1	0	0.411761	1.46179e-05	1	-1
13	protein_coding	ENSG00000127870	RNF6	5	0	0	3	16	8	-0.749	0.00797	1	-1	0.485094	0.0301886	1	1	-0.451	0.20309	1	0	-0.332173	0.0115156	1	1	-0.177	0.222	1	0	-0.338572	0.00750951	1	1	0.375251	0.218226	1	0	0.274	0.068	1	0	-0.541484	0.000195421	1	1	-0.422933	2.36487e-07	1	1
17	protein_coding	ENSG00000132383	RPA1	5	0	1	-8	16	8	0.366	0.00816	1	1	2.64693	0.0003373	1	1	0.966	0.014126	1	-1	0.481455	7.58352e-05	1	-1	-0.309	0.00509	1	1	-0.0348701	0.598154	1	0	0.0146276	0.975523	1	0	0.0987	0.473	1	0	-0.607772	3.99136e-05	1	1	-0.640567	1.82614e-13	1	1
7	protein_coding	ENSG00000106399	RPA3	5	0	0	-3	16	8	1.05	0.000183	1	1	-0.103533	0.631847	1	0	0.271	0.352953	1	0	0.21653	0.370238	1	0	-0.0279	0.77	1	0	-0.0890979	0.193998	1	0	-0.112616	0.831224	1	0	-0.424	0.0052	1	1	-1.25468	9.68849e-06	1	1	-0.773141	1.76045e-06	1	1
12	protein_coding	ENSG00000005175	RPAP3	5	0	0	-4	16	8	0.0611	0.853	1	0	0.518423	0.063477	1	0	1.24	0.009754	1	-1	0.20627	0.309216	1	0	-0.536	6.74e-05	1	1	-0.0659646	0.585781	1	0	-0.450575	0.124072	1	0	-0.523	0.0287	1	1	-0.428401	0.0295283	1	1	-0.312164	0.0138354	1	1
6	protein_coding	ENSG00000124787	RPP40	5	0	0	-7	16	8	-0.968	0.000124	1	-1	0.687765	0.0082803	1	1	1.15	0.005357	1	-1	0.493832	0.146926	1	0	0.067	0.589	1	0	-0.4084	0.00264665	1	1	-0.50082	0.355198	1	0	-0.453	0.00609	1	1	-0.640889	0.0856358	1	0	-0.391019	0.104876	1	0
18	protein_coding	ENSG00000141425	RPRD1A	5	0	0	-4	16	8	-0.19	0.497	1	0	1.65648	0.0009298	1	1	0.761	0.015923	1	-1	0.0437684	0.792122	1	0	0.0364	0.748	1	0	-0.658623	0.00023248	1	1	-0.214171	0.51698	1	0	-0.218	0.0773	1	0	-0.753103	8.74658e-07	1	1	-0.734798	6.61007e-18	1	1
22	protein_coding	ENSG00000189306	RRP7A	5	0	0	-6	16	8	-0.126	0.306	1	0	0.810287	0.0281834	1	1	0.79	0.049827	1	-1	-0.0313812	0.879246	1	0	-0.0486	0.501	1	0	-0.0299951	0.78667	1	0	-0.264828	0.533297	1	0	-0.29	0.0225	1	1	-0.474322	0.0133414	1	1	-0.56058	6.97427e-06	1	1
8	protein_coding	ENSG00000179041	RRS1	5	0	0	-4	16	8	-0.59	0.00167	1	-1	1.44121	0.0012941	1	1	1.5	0.004455	1	-1	-0.657081	0.0140937	1	1	-0.553	0.000721	1	1	-0.340688	0.00448479	1	1	-0.658647	0.170395	1	0	-0.013	0.939	1	0	-0.135675	0.543745	1	0	-0.0180486	0.924206	1	0
1	protein_coding	ENSG00000197747	S100A10	5	0	1	7	16	8	0.521	0.00686	1	1	1.05717	0.0105506	1	1	1.02	0.027831	1	-1	-0.334245	0.00050557	1	1	0.264	0.226	1	0	-0.136871	0.0862644	1	0	0.399899	0.118187	1	0	-0.0889	0.466	1	0	-0.414271	0.00318528	1	1	-0.0322523	0.72104	1	0
1	protein_coding	ENSG00000188015	S100A3	5	0	1	5	15	7	0.737	0.0014	1	1	1.2745	0.0010216	1	1	-0.53	0.259624	1	0	-1.95783	6.14689e-05	1	1	-0.0767	0.301	1	0	0.200715	0.0181333	1	-1	1.32811	0.0143544	1	1	-1.01	0.000104	1	1	0.889798	7.56366e-06	1	-1	0.286289	0.00104075	1	-1
19	protein_coding	ENSG00000180739	S1PR5	5	1	0	-4	14	6	-0.0846	0.602	1	0	0.592133	0.0516475	1	0	-0.663	0.02652	1	1	-0.922991	3.35155e-12	1	1	-0.221	0.0864	1	0	-0.182887	0.0207833	1	1	1.10647	0.0556646	1	0	0.00636	0.972	1	0	---	---	0	0	---	---	0	0
17	protein_coding	ENSG00000161526	SAP30BP	5	1	1	2	16	8	-0.00473	0.992	1	0	0.243584	0.186507	1	0	0.638	0.055514	1	0	0.0912592	0.562772	1	0	0.118	0.0552	1	0	-0.271293	0.0104453	1	1	0.303564	0.37503	1	0	0.114	0.368	1	0	-0.112037	0.666094	1	0	-0.315589	0.00754934	1	1
12	protein_coding	ENSG00000073060	SCARB1	5	0	0	1	16	8	0.164	0.295	1	0	-0.777569	0.0048868	1	-1	0.436	0.072656	1	0	-0.308402	0.0131076	1	1	-0.00055	0.994	1	0	0.0492674	0.619032	1	0	1.32852	2.07423e-08	1	1	-0.361	0.0129	1	1	0.150544	0.444941	1	0	0.0841543	0.435714	1	0
3	protein_coding	ENSG00000093183	SEC22C	5	0	0	-5	14	8	---	---	0	0	0.535361	0.0286104	1	1	0.529	0.339979	1	0	0.00125407	0.995534	1	0	-0.0403	0.558	1	0	-0.174799	0.033121	1	1	-0.175855	0.640588	1	0	---	---	0	0	-0.382218	0.0411659	1	1	-0.395866	0.000437005	1	1
18	protein_coding	ENSG00000085415	SEH1L	5	0	0	-8	16	8	-0.585	0.00249	1	-1	-0.405771	0.0552642	1	0	0.744	0.03737	1	-1	-0.622806	1.21945e-05	1	1	0.03	0.521	1	0	-0.607265	0.00038207	1	1	-0.207719	0.608194	1	0	-0.602	0.00426	1	1	-0.302806	0.0552403	1	0	-0.313882	0.000553789	1	1
1	protein_coding	ENSG00000142864	SERBP1	5	0	0	-4	16	8	-0.186	0.252	1	0	1.13286	0.001233	1	1	-0.565	0.175065	1	0	-0.132586	0.255179	1	0	-0.458	0.00157	1	1	-0.127976	0.151092	1	0	-0.385642	0.135365	1	0	-0.136	0.259	1	0	-0.220393	0.137347	1	0	-0.192222	0.00745107	1	1
1	protein_coding	ENSG00000168528	SERINC2	5	1	1	6	13	8	---	---	0	0	0.346998	0.098661	1	0	-0.164	0.507678	1	0	-0.20223	0.0658749	1	0	---	---	0	0	0.178048	0.0253403	1	-1	0.580918	0.023107	1	1	---	---	0	0	-0.458167	0.00126919	1	1	-0.486429	1.16929e-07	1	1
18	protein_coding	ENSG00000197632	SERPINB2	5	0	0	0	15	7	2.36	0.000238	1	1	-0.947106	0.0100501	1	-1	-2.37	0.002196	1	1	-3.48451	1.65952e-274	1	1	-0.984	1.88e-07	1	1	0.0693143	0.35402	1	0	3.40519	1.92795e-48	1	1	0.607	0.00865	1	-1	-2.6813	1.73144e-28	1	1	-3.07198	7.16426e-92	1	1
18	protein_coding	ENSG00000166396	SERPINB7	5	1	1	3	14	6	0.87	0.0013	1	1	0.37539	0.065945	1	0	-1.04	0.026775	1	1	-1.13774	3.51841e-43	1	1	-0.606	0.00491	1	1	0.212462	0.0220043	1	-1	-1.86595	2.09245e-10	1	-1	0.264	0.107	1	0	-1.32896	0.0545309	1	0	-0.607498	0.204435	1	0
1	protein_coding	ENSG00000116560	SFPQ	5	0	0	-8	16	8	0.327	0.0259	1	1	1.59387	0.0006506	1	1	1.76	0.00238	1	-1	-0.750297	5.01656e-17	1	1	-0.297	0.0585	1	0	0.0303422	0.638215	1	0	-0.27107	0.343772	1	0	-0.62	0.0019	1	1	-0.0652437	0.740377	1	0	-0.030535	0.716659	1	0
3	protein_coding	ENSG00000129810	SGO1	5	0	0	-18	14	8	---	---	0	0	-0.362875	0.321815	1	0	-0.256	0.248409	1	0	-2.1369	2.43347e-10	1	1	-0.0291	0.595	1	0	-0.0044502	0.97474	1	0	-0.621373	0.176873	1	0	---	---	0	0	-1.72822	1.90162e-11	1	1	-2.14238	1.2165e-26	1	1
2	protein_coding	ENSG00000163535	SGO2	5	0	0	-18	14	8	---	---	0	0	-1.5403	0.0013663	1	-1	-1.53	0.073389	1	0	-1.43213	2.84537e-13	1	1	-0.259	0.0278	1	1	-0.038217	0.580806	1	0	-0.653478	0.354857	1	0	---	---	0	0	-1.94782	3.1564e-29	1	1	-2.35164	5.71352e-61	1	1
1	protein_coding	ENSG00000027869	SH2D2A	5	0	0	3	13	5	0.688	0.000387	1	1	2.61179	0.0002625	1	1	0.0619	0.899349	1	0	-2.6488	6.85575e-06	1	1	0.0312	0.581	1	0	0.0893738	0.521635	1	0	3.18529	7.38002e-08	1	1	-1.07	5.16e-05	1	1	0.0605884	0.871853	1	0	0.102697	0.558865	1	0
16	protein_coding	ENSG00000171241	SHCBP1	5	0	0	-16	16	8	0.75	0.00393	1	1	-1.39684	0.0027984	1	-1	-0.23	0.461897	1	0	-1.78083	1.07966e-19	1	1	-0.135	0.0927	1	0	0.423029	0.00396225	1	-1	-0.881012	0.0623926	1	0	-1.87	0.000128	1	1	-1.69427	1.51218e-19	1	1	-2.01549	2.09428e-64	1	1
3	protein_coding	ENSG00000144736	SHQ1	5	0	0	-2	16	8	0.338	0.00973	1	1	0.692464	0.0705608	1	0	0.95	0.067872	1	0	0.388667	0.0538707	1	0	-0.0453	0.463	1	0	-0.17591	0.0719599	1	0	0.233977	0.558278	1	0	-0.148	0.225	1	0	-0.489793	0.0408262	1	1	-0.418078	0.0148484	1	1
X	protein_coding	ENSG00000146950	SHROOM2	5	1	1	1	16	8	0.152	0.359	1	0	0.380363	0.116677	1	0	0.244	0.396442	1	0	-0.0624902	0.779446	1	0	-0.0232	0.88	1	0	-0.0301358	0.764388	1	0	0.72819	0.0789024	1	0	-0.321	0.0264	1	1	-1.63471	0.0456516	1	1	-0.673448	0.313794	1	0
9	protein_coding	ENSG00000147955	SIGMAR1	5	0	0	-4	15	8	-0.769	0.0282	1	-1	2.67233	0.0003114	1	1	0.491	0.187547	1	0	-0.563958	4.30118e-07	1	1	---	---	0	0	0.20417	0.0169714	1	-1	0.162512	0.66164	1	0	-0.49	0.00372	1	1	-0.0605333	0.786527	1	0	-0.144832	0.150737	1	0
12	protein_coding	ENSG00000139146	SINHCAF	5	0	0	-1	16	8	-0.336	0.02	1	-1	-0.154531	0.419224	1	0	-0.448	0.492797	1	0	-0.0984807	0.562767	1	0	-0.0889	0.183	1	0	-0.127312	0.171113	1	0	1.43119	0.0102792	1	1	-0.201	0.102	1	0	-0.627518	0.000591753	1	1	-0.310088	0.00636257	1	1
17	protein_coding	ENSG00000182628	SKA2	5	0	0	-9	14	8	---	---	0	0	-1.10552	0.0012819	1	-1	0.25	0.423012	1	0	-0.0509398	0.766697	1	0	-0.125	0.028	1	1	-0.390908	0.00196316	1	1	-0.160997	0.74525	1	0	---	---	0	0	-0.686666	9.63407e-05	1	1	-0.565379	1.3996e-07	1	1
4	protein_coding	ENSG00000109171	SLAIN2	5	1	0	-1	13	8	---	---	0	0	-1.09497	0.0034381	1	-1	-0.935	0.015479	1	1	-1.15364	2.38185e-32	1	1	---	---	0	0	-0.659936	0.00030828	1	1	0.0435316	0.92804	1	0	---	---	0	0	-0.281314	0.13564	1	0	-0.277952	0.0117403	1	1
13	protein_coding	ENSG00000102743	SLC25A15	5	0	0	6	14	8	---	---	0	0	0.137835	0.468031	1	0	-0.00206	0.995413	1	0	-0.206139	0.496684	1	0	-0.0871	0.442	1	0	-0.179073	0.0469575	1	1	0.484962	0.286181	1	0	---	---	0	0	-0.354118	0.167366	1	0	-0.481532	0.00272743	1	1
1	protein_coding	ENSG00000116704	SLC35D1	5	1	0	9	16	8	0.211	0.233	1	0	0.239404	0.189856	1	0	-0.279	0.214708	1	0	-0.143661	0.439593	1	0	0.00222	0.985	1	0	-0.156664	0.12257	1	0	0.733401	0.00635163	1	1	-0.535	0.00125	1	1	-0.730316	2.48424e-05	1	1	-0.497022	5.86028e-07	1	1
18	protein_coding	ENSG00000141424	SLC39A6	5	0	0	1	16	8	0.337	0.0174	1	1	3.14905	0.0001257	1	1	-0.658	0.023862	1	1	-0.336696	0.00207837	1	1	-0.0384	0.817	1	0	0.379301	0.00081039	1	-1	0.446342	0.103276	1	0	0.416	0.0142	1	-1	-0.544131	0.000909897	1	1	-0.503471	6.93924e-14	1	1
11	protein_coding	ENSG00000168003	SLC3A2	5	0	0	-6	16	8	-0.713	0.00175	1	-1	-0.432659	0.0694509	1	0	-0.155	0.635319	1	0	-0.479957	1.25317e-07	1	1	-0.605	0.00544	1	1	0.34212	0.00323267	1	-1	-0.558903	0.184335	1	0	-1.15	6.1e-05	1	1	-0.25138	0.0574531	1	0	-0.225954	0.000806567	1	1
3	protein_coding	ENSG00000132164	SLC6A11	5	0	0	0	13	5	-0.0167	0.924	1	0	0.631795	0.0136829	1	1	-0.312	0.175285	1	0	-1.34748	2.22376e-25	1	1	-0.0692	0.114	1	0	0.0941706	0.302775	1	0	---	---	0	0	0.172	0.186	1	0	0.180081	0.920341	1	0	0.377419	0.745391	1	0
4	protein_coding	ENSG00000151012	SLC7A11	5	0	0	-5	16	8	-1.73	1.4e-05	1	-1	-0.558178	0.0599385	1	0	-1.84	0.013106	1	1	-2.33932	1.07563e-36	1	1	0.0162	0.888	1	0	0.170576	0.182124	1	0	0.339976	0.634785	1	0	-2.72	1.29e-06	1	1	-0.803008	0.000218009	1	1	-0.207937	0.191036	1	0
6	protein_coding	ENSG00000224531	SMIM13	5	0	0	0	10	8	---	---	0	0	0.232096	0.375804	1	0	-0.953	0.029579	1	1	-0.955314	1.46007e-08	1	1	---	---	0	0	---	---	0	0	0.129571	0.743027	1	0	---	---	0	0	-0.851716	0.000112165	1	1	-0.562039	0.000466024	1	1
2	protein_coding	ENSG00000135632	SMYD5	5	0	0	-7	15	8	0.0982	0.515	1	0	0.567094	0.0153625	1	1	0.501	0.048089	1	-1	-0.583942	0.000646179	1	1	---	---	0	0	-0.182735	0.036088	1	1	0.21065	0.633594	1	0	-0.336	0.012	1	1	-0.0164957	0.957409	1	0	-0.0932053	0.573113	1	0
8	protein_coding	ENSG00000019549	SNAI2	5	1	1	6	15	8	0.405	0.00446	1	1	-0.9416	0.0024816	1	-1	-2.4	0.001771	1	1	-2.17714	8.99135e-56	1	1	---	---	0	0	-0.421287	0.00076808	1	1	-0.600386	0.0204239	1	-1	-2.07	2.28e-05	1	1	0.210832	0.181932	1	0	0.409725	1.04753e-07	1	-1
15	protein_coding	ENSG00000131876	SNRPA1	5	0	0	-1	16	8	0.101	0.4	1	0	0.758597	0.0061258	1	1	0.479	0.058464	1	0	-1.06454	7.21144e-07	1	1	-0.367	0.00161	1	1	0.718796	0.00037016	1	-1	-0.338421	0.409774	1	0	0.195	0.143	1	0	-0.211924	0.545753	1	0	-0.4256	0.0382354	1	1
12	protein_coding	ENSG00000139343	SNRPF	5	0	0	-4	16	8	0.0885	0.534	1	0	-0.452237	0.076075	1	0	0.553	0.076269	1	0	-0.437207	0.0451753	1	1	-0.215	0.0436	1	1	-0.194757	0.0540457	1	0	-0.533637	0.136374	1	0	-0.278	0.0527	1	0	-0.180756	0.514667	1	0	0.10994	0.569379	1	0
1	protein_coding	ENSG00000143376	SNX27	5	0	0	1	16	8	-0.222	0.136	1	0	-0.924409	0.0033786	1	-1	-0.627	0.025467	1	1	0.118645	0.409223	1	0	-0.0165	0.778	1	0	-0.282969	0.00532052	1	1	0.568347	0.066878	1	0	-0.603	0.000843	1	1	-0.404165	0.0288238	1	1	-0.295225	0.0104745	1	1
20	protein_coding	ENSG00000149639	SOGA1	5	1	1	1	13	8	---	---	0	0	-0.471757	0.0567545	1	0	-0.361	0.193856	1	0	-0.850648	4.66627e-17	1	1	---	---	0	0	0.0396632	0.526226	1	0	0.405376	0.464891	1	0	---	---	0	0	-0.6005	3.84504e-05	1	1	-0.49127	8.42371e-09	1	1
8	protein_coding	ENSG00000104450	SPAG1	5	0	1	7	16	8	0.0043	0.986	1	0	1.48679	0.0009112	1	1	1.1	0.007718	1	-1	-1.0642	2.51021e-12	1	1	-0.15	0.379	1	0	-0.0215734	0.79634	1	0	1.48615	1.74493e-08	1	1	-0.0528	0.775	1	0	-1.13407	1.66377e-10	1	1	-1.02832	7.34259e-19	1	1
4	protein_coding	ENSG00000145375	SPATA5	5	0	0	-11	14	8	---	---	0	0	0.273263	0.177909	1	0	0.548	0.071786	1	0	-0.838938	2.92016e-06	1	1	0.0779	0.647	1	0	0.0504997	0.552228	1	0	-0.339274	0.57575	1	0	---	---	0	0	-0.698924	0.005396	1	1	-0.711948	6.52965e-06	1	1
17	protein_coding	ENSG00000167881	SRP68	5	1	1	1	14	8	---	---	0	0	0.179206	0.382237	1	0	-0.381	0.153675	1	0	0.0838556	0.569506	1	0	-0.172	0.0141	1	1	-0.27575	0.00433593	1	1	0.317816	0.265261	1	0	---	---	0	0	-0.239469	0.168276	1	0	-0.385428	1.8113e-05	1	1
4	protein_coding	ENSG00000174780	SRP72	5	0	0	-3	15	8	-0.721	0.000982	1	-1	0.536563	0.0750327	1	0	-0.823	0.158313	1	0	-0.204045	0.0740711	1	0	---	---	0	0	-0.279651	0.00517266	1	1	-0.285075	0.332054	1	0	-0.546	0.00183	1	1	-0.322147	0.0421542	1	1	-0.232825	0.000977781	1	1
X	protein_coding	ENSG00000101955	SRPX	5	0	0	7	14	7	0.47	0.00251	1	1	-1.4197	0.0279527	1	-1	-0.306	0.738912	1	0	-0.769601	0.000889989	1	1	---	---	0	0	0.930003	0.00018257	1	-1	0.938168	0.00245174	1	1	-0.55	0.00162	1	1	-0.664834	0.0216912	1	1	-0.661675	0.000395604	1	1
1	protein_coding	ENSG00000188529	SRSF10	5	0	1	-7	16	8	0.279	0.0193	1	1	1.76283	0.0003259	1	1	1.94	0.007929	1	-1	0.30219	0.0251225	1	-1	-0.154	0.00325	1	1	0.184508	0.31186	1	0	0.101066	0.796482	1	0	0.202	0.0921	1	0	-0.465026	0.00196041	1	1	-0.456897	7.74712e-08	1	1
2	protein_coding	ENSG00000115875	SRSF7	5	0	1	-11	15	8	0.344	0.0186	1	1	1.84029	0.0003704	1	1	1.06	0.007986	1	-1	-0.250265	0.0462951	1	1	---	---	0	0	0.174798	0.0246981	1	-1	-0.0322056	0.939495	1	0	-0.697	0.00419	1	1	-0.215945	0.223292	1	0	-0.424952	1.15362e-07	1	1
3	protein_coding	ENSG00000118007	STAG1	5	0	0	-8	16	8	-0.512	0.0155	1	-1	-1.19331	0.0090287	1	-1	-0.854	0.061526	1	0	-0.389329	0.00879755	1	1	-0.0854	0.593	1	0	-0.354132	0.00300432	1	1	-0.270987	0.422053	1	0	-0.562	0.00115	1	1	-0.91946	1.70576e-08	1	1	-1.00697	3.15159e-24	1	1
14	protein_coding	ENSG00000140022	STON2	5	1	1	5	13	8	---	---	0	0	-0.732985	0.0378572	1	-1	-1.01	0.027252	1	1	-0.355668	0.000483065	1	1	---	---	0	0	-0.261169	0.00494676	1	1	7.16054	5.01216e-05	1	1	---	---	0	0	0.452294	0.0242226	1	-1	0.652625	3.141e-10	1	-1
14	protein_coding	ENSG00000092201	SUPT16H	5	0	0	-5	16	8	-0.178	0.35	1	0	1.1823	0.003823	1	1	1.39	0.006879	1	-1	0.156312	0.201522	1	0	-0.281	0.0031	1	1	-0.0651874	0.303988	1	0	0.0483225	0.903669	1	0	-0.127	0.279	1	0	-0.350997	0.0238157	1	1	-0.405761	8.03444e-10	1	1
10	protein_coding	ENSG00000148835	TAF5	5	0	0	-10	16	8	0.256	0.0587	1	0	-0.748847	0.0119777	1	-1	0.577	0.078363	1	0	-0.126946	0.671857	1	0	-0.0436	0.601	1	0	-0.107351	0.173347	1	0	-0.23985	0.670153	1	0	-0.581	0.00162	1	1	-0.965192	0.000534111	1	1	-1.15561	2.08222e-08	1	1
3	protein_coding	ENSG00000144559	TAMM41	5	1	0	-1	14	8	---	---	0	0	1.11999	0.004117	1	1	0.564	0.187994	1	0	0.0113142	0.983236	1	0	0.0265	0.686	1	0	-0.180562	0.0417235	1	1	0.153522	0.802046	1	0	---	---	0	0	0.0959475	0.827565	1	0	-0.0941379	0.740072	1	0
2	protein_coding	ENSG00000115183	TANC1	5	1	1	8	13	8	---	---	0	0	-0.34329	0.0835745	1	0	-0.416	0.082025	1	0	-0.491607	6.73463e-06	1	1	---	---	0	0	-0.128383	0.0592991	1	0	0.899547	0.00091474	1	1	---	---	0	0	-0.514492	0.00153768	1	1	-0.339586	0.000758601	1	1
16	protein_coding	ENSG00000103047	TANGO6	5	0	0	-2	13	8	---	---	0	0	1.01644	0.0019992	1	1	0.256	0.324474	1	0	-0.59471	0.00179413	1	1	---	---	0	0	0.123981	0.111655	1	0	-0.518489	0.190992	1	0	---	---	0	0	-0.502084	0.0532097	1	0	-0.133348	0.517834	1	0
7	protein_coding	ENSG00000136270	TBRG4	5	0	0	-6	16	8	-0.322	0.0932	1	0	0.469665	0.0302161	1	1	0.634	0.072633	1	0	-0.434609	0.000574254	1	1	-0.308	0.00393	1	1	0.44585	0.00075286	1	-1	0.137722	0.71999	1	0	-0.122	0.471	1	0	0.0656776	0.798657	1	0	-0.0238958	0.871477	1	0
6	protein_coding	ENSG00000137310	TCF19	5	0	0	-16	14	8	---	---	0	0	-0.296691	0.394112	1	0	-0.13	0.789638	1	0	-0.884616	3.70729e-08	1	1	-0.0741	0.53	1	0	-0.125521	0.0918179	1	0	0.526086	0.0516435	1	0	---	---	0	0	-0.683799	0.000251009	1	1	-1.4298	8.38723e-26	1	1
22	protein_coding	ENSG00000100207	TCF20	5	0	0	0	16	8	0.0493	0.703	1	0	-0.015	0.952607	1	0	0.0133	0.971294	1	0	-0.417662	2.44967e-05	1	1	-0.151	0.00414	1	1	0.0510679	0.450522	1	0	0.718917	0.00564744	1	1	0.163	0.17	1	0	-0.237574	0.224203	1	0	-0.247433	0.0154312	1	1
6	protein_coding	ENSG00000120438	TCP1	5	0	0	-6	16	8	-0.298	0.0561	1	0	0.974713	0.0026382	1	1	0.961	0.009778	1	-1	-0.536151	5.79429e-08	1	1	-0.124	0.337	1	0	0.517192	0.0124339	1	-1	-0.469784	0.0589062	1	0	-0.101	0.509	1	0	-0.385503	0.00326618	1	1	-0.388121	3.56651e-09	1	1
16	protein_coding	ENSG00000121274	TENT4B	5	0	0	-1	13	8	---	---	0	0	-1.658	0.0004906	1	-1	-1.09	0.006117	1	1	-0.712373	1.51821e-06	1	1	---	---	0	0	-0.222225	0.012347	1	1	0.0740772	0.866643	1	0	---	---	0	0	-0.52533	0.0368861	1	1	-0.410654	0.006569	1	1
13	protein_coding	ENSG00000198176	TFDP1	5	0	0	-11	16	8	0.0468	0.77	1	0	1.46474	0.0010773	1	1	1.1	0.010229	1	-1	-0.0758079	0.582357	1	0	-0.29	0.076	1	0	-0.280168	0.00222649	1	1	-0.0784217	0.8509	1	0	-0.209	0.0873	1	0	-0.685417	2.25873e-08	1	1	-0.86599	1.18174e-41	1	1
20	protein_coding	ENSG00000178726	THBD	5	0	1	2	15	7	-0.328	0.0182	1	-1	-1.02504	0.0020687	1	-1	-3.75	0.001201	1	1	-1.38038	4.28185e-13	1	1	0.0235	0.738	1	0	-0.259772	0.0252553	1	1	-1.38211	0.430937	1	0	-1.32	2.01e-05	1	1	-0.918141	3.28594e-08	1	1	-0.80356	2.13331e-15	1	1
15	protein_coding	ENSG00000140534	TICRR	5	0	0	-18	14	8	---	---	0	0	-0.208903	0.412405	1	0	-0.419	0.175008	1	0	-2.46757	7.2444e-25	1	1	-0.134	0.169	1	0	0.27284	0.00756293	1	-1	0.552499	0.191313	1	0	---	---	0	0	-1.4403	2.51127e-12	1	1	-2.13474	2.61634e-42	1	1
4	protein_coding	ENSG00000145365	TIFA	5	1	1	-11	14	8	---	---	0	0	-0.881342	0.0052736	1	-1	-0.96	0.015859	1	1	0.0361372	0.910201	1	0	-0.25	0.0344	1	1	-0.0670899	0.337878	1	0	0.326337	0.513538	1	0	---	---	0	0	-0.756418	0.0203963	1	1	-0.650245	0.00677468	1	1
1	protein_coding	ENSG00000142910	TINAGL1	5	1	0	6	16	8	0.775	0.00127	1	1	-0.0978507	0.733488	1	0	-0.431	0.198021	1	0	-1.88918	2.64513e-81	1	1	-0.21	0.423	1	0	0.223252	0.0143792	1	-1	1.25455	7.17652e-06	1	1	-0.579	0.00168	1	1	-0.166362	0.50809	1	0	-0.2417	0.0351529	1	1
15	protein_coding	ENSG00000075131	TIPIN	5	0	0	-17	16	8	-0.176	0.122	1	0	-0.383187	0.0793575	1	0	0.741	0.015234	1	-1	-0.0652886	0.87717	1	0	-0.586	0.00101	1	1	-0.174265	0.083901	1	0	0.0983809	0.882315	1	0	-0.787	0.000221	1	1	-0.306748	0.342616	1	0	-0.815245	0.00035491	1	1
12	protein_coding	ENSG00000057704	TMCC3	5	0	1	1	14	8	---	---	0	0	-1.96058	0.000569	1	-1	-2.2	0.002799	1	1	-1.61174	4.26958e-46	1	1	0.141	0.0118	1	-1	-0.257985	0.0218673	1	1	1.47172	0.340329	1	0	---	---	0	0	-1.38849	0.00278262	1	1	-1.42519	3.29076e-06	1	1
12	protein_coding	ENSG00000134291	TMEM106C	5	0	0	-5	16	8	-0.00416	0.987	1	0	-0.0583767	0.773345	1	0	-0.223	0.353003	1	0	-0.632436	2.47335e-07	1	1	-0.0351	0.764	1	0	0.0891785	0.165727	1	0	-0.275723	0.563164	1	0	-0.189	0.122	1	0	-0.831708	0.000188476	1	1	-0.994154	3.19689e-14	1	1
10	protein_coding	ENSG00000107854	TNKS2	5	1	1	6	16	8	0.0957	0.68	1	0	0.921932	0.0031212	1	1	-1.23	0.004184	1	1	-0.91077	1.58664e-20	1	1	0.0552	0.319	1	0	-0.113068	0.069751	1	0	0.556123	0.02358	1	1	-0.0669	0.686	1	0	-0.577753	0.000311597	1	1	-0.475979	1.19046e-06	1	1
19	protein_coding	ENSG00000105048	TNNT1	5	0	0	-3	15	8	0.0254	0.925	1	0	1.68533	0.000346	1	1	-0.758	0.023972	1	1	-0.449137	9.34134e-05	1	1	---	---	0	0	-0.308885	0.00791937	1	1	-0.303214	0.773082	1	0	0.00844	0.962	1	0	-0.0216298	0.970093	1	0	0.0504488	0.896189	1	0
17	protein_coding	ENSG00000131747	TOP2A	5	0	1	-12	16	8	-0.114	0.413	1	0	-1.30945	0.0023708	1	-1	-1.6	0.018417	1	1	-2.52951	8.34493e-123	1	1	-0.198	0.181	1	0	0.0302664	0.746298	1	0	-0.355389	0.592217	1	0	-2	5.46e-06	1	1	-2.39048	2.85715e-75	1	1	-2.3247	1.05638e-267	1	1
20	protein_coding	ENSG00000101150	TPD52L2	5	0	0	-2	16	8	-0.248	0.25	1	0	0.856834	0.0141148	1	1	0.481	0.117623	1	0	-0.28247	0.00764061	1	1	0.0768	0.397	1	0	-0.295693	0.00676731	1	1	-0.182108	0.553605	1	0	-0.0499	0.768	1	0	-0.435631	0.00150351	1	1	-0.462452	2.29238e-11	1	1
12	protein_coding	ENSG00000111669	TPI1	5	0	0	-2	16	8	0.114	0.355	1	0	-0.679343	0.0213471	1	-1	0.329	0.257966	1	0	-0.584021	1.92816e-07	1	1	-0.159	0.0129	1	1	-0.742414	0.00024111	1	1	-0.0298132	0.942369	1	0	-0.818	0.000536	1	1	-0.146288	0.346595	1	0	0.00559544	0.959656	1	0
20	protein_coding	ENSG00000088325	TPX2	5	0	0	-19	16	8	0.0192	0.969	1	0	0.143286	0.729275	1	0	-0.737	0.108801	1	0	-1.89749	1.66484e-57	1	1	0.0083	0.972	1	0	0.124673	0.104007	1	0	-0.905099	0.0296448	1	-1	-1.6	7.81e-06	1	1	-1.72698	1.36172e-46	1	1	-1.95566	2.65477e-189	1	1
3	protein_coding	ENSG00000136527	TRA2B	5	0	0	-13	16	8	0.162	0.155	1	0	1.49528	0.0008677	1	1	1.04	0.005378	1	-1	-0.113509	0.421201	1	0	-0.586	6.17e-06	1	1	-0.0346146	0.568583	1	0	-0.287079	0.325371	1	0	-0.477	0.00236	1	1	-0.180446	0.254187	1	0	-0.224638	0.00213294	1	1
6	protein_coding	ENSG00000095970	TREM2	5	0	0	6	12	4	2.12	2.28e-05	1	1	0.557236	0.0180295	1	1	-0.234	0.297141	1	0	-3.4528	0.224641	1	0	0.0469	0.699	1	0	0.117227	0.201246	1	0	8.38613	1.08423e-46	1	1	-0.0101	0.955	1	0	---	---	0	0	-1.72664	0.00264595	1	1
22	protein_coding	ENSG00000100304	TTLL12	5	1	0	-6	16	8	-0.38	0.0509	1	0	0.211855	0.354572	1	0	-0.103	0.793022	1	0	-0.0345977	0.830451	1	0	-0.0649	0.397	1	0	-0.25096	0.00440495	1	1	-0.217347	0.615268	1	0	-0.021	0.898	1	0	0.125014	0.531012	1	0	0.0416692	0.776636	1	0
13	protein_coding	ENSG00000126216	TUBGCP3	5	0	0	-16	16	8	-0.287	0.158	1	0	-0.0243068	0.933369	1	0	-0.245	0.338204	1	0	-0.00544514	0.985136	1	0	0.0684	0.687	1	0	-0.100189	0.181993	1	0	-0.189143	0.685057	1	0	-1.04	0.00413	1	1	-0.611717	0.000165649	1	1	-0.831786	2.54183e-15	1	1
17	protein_coding	ENSG00000129235	TXNDC17	5	1	0	3	13	8	---	---	0	0	0.545379	0.031499	1	1	0.436	0.127687	1	0	0.200552	0.155413	1	0	---	---	0	0	-0.746061	0.00063361	1	1	0.81015	0.00135096	1	1	---	---	0	0	-0.0410591	0.898197	1	0	0.204243	0.156518	1	0
10	protein_coding	ENSG00000156521	TYSND1	5	1	0	5	14	8	---	---	0	0	-1.01524	0.0051599	1	-1	-0.49	0.140559	1	0	-0.388059	0.00312842	1	1	-0.251	0.124	1	0	-0.273809	0.00839036	1	1	0.12787	0.795055	1	0	---	---	0	0	0.163922	0.577746	1	0	0.185693	0.250449	1	0
20	protein_coding	ENSG00000175063	UBE2C	5	0	0	-17	15	8	0.00621	0.984	1	0	-0.673242	0.0319029	1	-1	-1.52	0.005432	1	1	-2.53126	8.55051e-47	1	1	---	---	0	0	0.032387	0.597348	1	0	-0.902008	0.0917187	1	0	-1.77	7.94e-06	1	1	-2.07372	1.06093e-44	1	1	-2.19128	5.40109e-78	1	1
4	protein_coding	ENSG00000078140	UBE2K	5	0	0	-5	16	8	-0.0646	0.56	1	0	0.748041	0.0094615	1	1	0.56	0.041059	1	-1	-0.309636	0.0114475	1	1	-0.0789	0.495	1	0	-0.300412	0.00567353	1	1	-0.255785	0.384448	1	0	0.122	0.312	1	0	-0.600666	1.94585e-05	1	1	-0.580946	2.0562e-14	1	1
19	protein_coding	ENSG00000108106	UBE2S	5	0	0	-13	12	8	---	---	0	0	---	---	0	0	---	---	0	0	-1.6691	1.62198e-33	1	1	0.0121	0.927	1	0	0.192197	0.0903883	1	0	-0.944554	0.0522099	1	0	---	---	0	0	-1.04369	7.8545e-08	1	1	-1.14908	6.2129e-13	1	1
15	protein_coding	ENSG00000114062	UBE3A	5	0	0	-2	16	8	-0.352	0.113	1	0	0.84774	0.0046487	1	1	-0.442	0.084021	1	0	-0.331826	0.0016517	1	1	-0.0385	0.551	1	0	-0.25694	0.0150255	1	1	-0.0471152	0.926247	1	0	0.163	0.185	1	0	-0.482739	0.00366567	1	1	-0.271218	0.00432519	1	1
1	protein_coding	ENSG00000116750	UCHL5	5	0	0	-8	16	8	-0.538	0.00504	1	-1	0.97782	0.0030806	1	1	0.693	0.021812	1	-1	0.228312	0.186538	1	0	-0.261	0.012	1	1	-0.0683272	0.490455	1	0	-0.44598	0.179864	1	0	-0.556	0.0024	1	1	-0.650977	6.88948e-06	1	1	-0.657668	1.67231e-14	1	1
4	protein_coding	ENSG00000109814	UGDH	5	0	0	-1	16	8	-0.0873	0.691	1	0	-0.960853	0.0026218	1	-1	-0.163	0.477951	1	0	-0.425414	0.00902835	1	1	0.186	0.00741	1	-1	-0.754045	0.00023227	1	1	0.167303	0.623267	1	0	-0.771	0.000603	1	1	-0.342015	0.119552	1	0	-0.406819	0.000505727	1	1
6	protein_coding	ENSG00000131015	ULBP2	5	0	0	8	15	7	0.098	0.469	1	0	1.61499	0.0009434	1	1	-0.954	0.027434	1	1	-0.823958	0.0254457	1	1	-0.552	0.000176	1	1	0.357732	0.0675717	1	0	0.599318	0.168487	1	0	-0.468	0.00351	1	1	0.362494	0.553639	1	0	-0.477278	0.198653	1	0
2	protein_coding	ENSG00000135913	USP37	5	0	0	-12	14	8	---	---	0	0	-1.97605	0.0003061	1	-1	-0.975	0.011128	1	1	0.213697	0.308769	1	0	-0.168	0.186	1	0	-0.0518633	0.539778	1	0	0.721065	0.0178441	1	1	---	---	0	0	-0.690216	0.00975229	1	1	-0.808032	3.59e-05	1	1
1	protein_coding	ENSG00000183520	UTP11	5	0	0	-3	16	8	-0.702	0.000903	1	-1	2.15525	0.000713	1	1	1.48	0.007816	1	-1	-0.22212	0.187707	1	0	-0.489	3.59e-05	1	1	-0.257017	0.0480442	1	1	-0.346824	0.279406	1	0	-0.0901	0.568	1	0	-0.172017	0.452659	1	0	-0.366213	0.00170128	1	1
8	protein_coding	ENSG00000147679	UTP23	5	0	0	-3	14	8	---	---	0	0	0.700977	0.0370467	1	1	0.703	0.044747	1	-1	0.538261	0.0136125	1	-1	-0.147	0.00745	1	1	-0.477046	0.00093394	1	1	-0.0892449	0.847732	1	0	---	---	0	0	-0.681829	0.000996458	1	1	-0.409165	0.00015794	1	1
10	protein_coding	ENSG00000026025	VIM	5	0	0	-2	16	8	0.0331	0.851	1	0	1.00047	0.004097	1	1	-2.28	0.001899	1	1	-2.16398	1.58196e-69	1	1	-0.0301	0.596	1	0	0.0592247	0.380778	1	0	-1.12667	1.34363e-05	1	-1	-0.527	0.00301	1	1	-0.286786	0.0190671	1	1	-0.241008	4.76951e-05	1	1
6	protein_coding	ENSG00000009844	VTA1	5	0	0	0	14	8	---	---	0	0	1.41628	0.0008657	1	1	0.421	0.089634	1	0	0.273893	0.0318371	1	-1	-0.193	0.00032	1	1	-0.379155	0.0018964	1	1	-0.4331	0.122127	1	0	---	---	0	0	-0.469194	0.00392296	1	1	-0.440103	3.08118e-06	1	1
1	protein_coding	ENSG00000158195	WASF2	5	0	1	-2	16	8	0.114	0.775	1	0	-0.845844	0.0038961	1	-1	-0.582	0.038395	1	1	-0.844766	5.55528e-13	1	1	-0.035	0.706	1	0	-0.591647	0.00142633	1	1	-0.134163	0.693795	1	0	-0.52	0.00448	1	1	-0.235608	0.140613	1	0	-0.1598	0.0549818	1	0
14	protein_coding	ENSG00000198554	WDHD1	5	0	0	-17	15	8	1.07	0.000611	1	1	-0.93592	0.003936	1	-1	0.539	0.066448	1	0	-0.759495	9.72272e-06	1	1	---	---	0	0	0.0530139	0.586453	1	0	0.0571469	0.904554	1	0	-0.609	0.0021	1	1	-0.904255	1.19158e-05	1	1	-1.48048	1.0125e-28	1	1
2	protein_coding	ENSG00000118965	WDR35	5	0	0	-3	14	8	---	---	0	0	-0.212296	0.364214	1	0	0.562	0.120398	1	0	-0.531158	0.0206983	1	1	-0.0224	0.803	1	0	0.105736	0.258534	1	0	0.152998	0.809831	1	0	---	---	0	0	-0.392889	0.0428327	1	1	-0.292332	0.00935956	1	1
2	protein_coding	ENSG00000163811	WDR43	5	1	1	-1	15	8	-0.466	0.136	1	0	-0.77837	0.0053944	1	-1	0.31	0.200069	1	0	-0.499063	0.000316683	1	1	---	---	0	0	0.615428	0.00078227	1	-1	0.0209816	0.965159	1	0	-0.0865	0.571	1	0	-0.41712	0.00407222	1	1	-0.291445	0.000420033	1	1
19	protein_coding	ENSG00000075702	WDR62	5	0	0	-14	16	8	0.119	0.293	1	0	0.396623	0.0602287	1	0	-0.362	0.121026	1	0	1.10606	1.0487e-14	1	-1	-0.0592	0.471	1	0	0.0975026	0.154256	1	0	-0.696903	0.153107	1	0	-0.383	0.00715	1	1	-1.24783	8.01959e-09	1	1	-1.95362	3.83413e-27	1	1
11	protein_coding	ENSG00000166483	WEE1	5	0	0	-8	16	8	0.0108	0.946	1	0	-2.6873	0.0002758	1	-1	-1.95	0.002884	1	1	-1.91088	3.25427e-58	1	1	-0.599	0.00065	1	1	0.979407	0.00022079	1	-1	0.514583	0.0618546	1	0	-0.263	0.0513	1	0	-0.745037	2.60461e-05	1	1	-1.15399	1.29424e-14	1	1
7	protein_coding	ENSG00000106636	YKT6	5	0	0	0	16	8	0.267	0.13	1	0	1.46307	0.000625	1	1	0.514	0.044646	1	-1	-0.322521	0.00312927	1	1	-0.0522	0.23	1	0	-0.23188	0.00623838	1	1	0.0676145	0.870665	1	0	-0.457	0.00259	1	1	-0.315657	0.0290268	1	1	-0.279857	0.000157216	1	1
2	protein_coding	ENSG00000134308	YWHAQ	5	0	0	-1	16	8	0.47	0.00356	1	1	0.807135	0.0065597	1	1	-0.165	0.503542	1	0	-0.186836	0.06557	1	0	0.09	0.343	1	0	-0.126195	0.0832069	1	0	-0.620317	0.0131465	1	-1	-0.0616	0.664	1	0	-0.653657	3.07793e-05	1	1	-0.393884	8.26911e-12	1	1
2	protein_coding	ENSG00000065548	ZC3H15	5	0	0	-3	16	8	-0.431	0.0239	1	-1	1.07792	0.0019852	1	1	-0.581	0.459529	1	0	-0.152339	0.277636	1	0	-0.206	0.0229	1	1	-0.2334	0.00971136	1	1	-0.417808	0.166335	1	0	-0.0563	0.696	1	0	-0.376371	0.0284504	1	1	-0.238761	0.0190715	1	1
7	protein_coding	ENSG00000178381	ZFAND2A	5	0	0	1	14	8	---	---	0	0	0.782002	0.0104142	1	1	-0.329	0.37403	1	0	-0.625531	0.00518816	1	1	-0.234	0.00911	1	1	-0.5032	0.00075738	1	1	-0.180843	0.672718	1	0	---	---	0	0	-0.341317	0.378667	1	0	-0.603497	0.00888167	1	1
18	protein_coding	ENSG00000172466	ZNF24	5	0	0	0	16	8	0.0674	0.587	1	0	0.859548	0.0042484	1	1	-0.713	0.101001	1	0	-0.791962	1.9024e-13	1	1	-0.168	0.081	1	0	-0.0137627	0.893071	1	0	0.689779	0.00431684	1	1	-0.203	0.2	1	0	-0.457782	0.01639	1	1	-0.341728	0.000734496	1	1
16	protein_coding	ENSG00000167962	ZNF598	5	0	0	-3	14	8	---	---	0	0	0.656743	0.0115873	1	1	-0.632	0.03081	1	1	-0.909812	1.04194e-08	1	1	-0.23	0.0109	1	1	-0.0223374	0.807908	1	0	0.364086	0.210562	1	0	---	---	0	0	0.163753	0.497965	1	0	-0.10866	0.459843	1	0
8	protein_coding	ENSG00000164684	ZNF704	5	0	0	-1	12	7	---	---	0	0	-0.153716	0.456307	1	0	-0.475	0.061526	1	0	-0.730652	0.00560871	1	1	---	---	0	0	-0.273714	0.0033963	1	1	4.3079	8.93535e-12	1	1	---	---	0	0	-0.0644123	0.880799	1	0	-0.0739294	0.816214	1	0
4	protein_coding	ENSG00000109576	AADAT	4	0	0	0	13	7	---	---	0	0	-0.12396	0.517905	1	0	0.308	0.180042	1	0	1.13495	0.020209	1	-1	-0.0465	0.397	1	0	-0.362436	0.00320952	1	1	0.0976387	0.88976	1	0	---	---	0	0	-0.0616554	0.902247	1	0	-0.203243	0.43995	1	0
16	protein_coding	ENSG00000090861	AARS	4	0	0	-7	16	8	-0.761	0.0416	1	-1	0.237768	0.237024	1	0	0.453	0.083491	1	0	-0.379631	0.00200603	1	1	-0.364	0.00353	1	1	-0.128333	0.0788763	1	0	-0.409767	0.374368	1	0	-1.36	1.41e-05	1	1	-0.0875492	0.685056	1	0	-0.147765	0.186001	1	0
2	protein_coding	ENSG00000144452	ABCA12	4	1	0	11	14	7	-1.13	8.41e-05	1	-1	2.05967	0.0002124	1	1	-1.76	0.003591	1	1	-1.11295	2.16944e-36	1	1	---	---	0	0	0.613849	0.00075693	1	-1	1.79526	0.000410201	1	1	-0.321	0.0182	1	1	0.411799	0.0355581	1	-1	0.66155	2.22519e-15	1	-1
10	protein_coding	ENSG00000136754	ABI1	4	1	1	-1	16	8	0.354	0.027	1	1	-1.20384	0.0011125	1	-1	-0.923	0.008109	1	1	-0.185397	0.108379	1	0	-0.219	0.00562	1	1	-0.342543	0.00096239	1	1	-0.253324	0.466229	1	0	-0.151	0.379	1	0	-0.155715	0.488411	1	0	-0.0145536	0.926543	1	0
6	protein_coding	ENSG00000146109	ABT1	4	0	1	-2	16	8	0.133	0.418	1	0	1.04313	0.0051599	1	1	0.297	0.32412	1	0	0.0656845	0.76966	1	0	-0.227	0.0016	1	1	-0.734264	0.00047791	1	1	-0.140394	0.768777	1	0	0.0421	0.781	1	0	-0.202633	0.488948	1	0	-0.155612	0.425117	1	0
2	TEC	ENSG00000279519	AC007382.1	4	0	0	---	11	7	0.448	0.00988	1	1	0.677728	0.01191	1	1	-0.486	0.062763	1	0	-1.25401	0.000223169	1	1	---	---	0	0	---	---	0	0	0.30132	0.754088	1	0	-0.439	0.00649	1	1	-0.142236	0.823152	1	0	-0.502319	0.188581	1	0
11	antisense	ENSG00000260196	AC124798.1	4	0	0	---	10	8	---	---	0	0	1.13258	0.0038577	1	1	0.0255	0.947548	1	0	-4.05914	4.37599e-26	1	1	---	---	0	0	---	---	0	0	2.10317	0.00112834	1	1	---	---	0	0	0.477817	0.29435	1	0	-0.165361	0.607975	1	0
1	protein_coding	ENSG00000182827	ACBD3	4	1	1	2	16	8	0.351	0.0391	1	1	-1.30199	0.0020299	1	-1	-1.01	0.012457	1	1	-0.327822	0.00708478	1	1	0.461	0.00288	1	-1	-0.217434	0.00957543	1	1	-0.0214192	0.96387	1	0	0.21	0.0914	1	0	-0.386901	0.0209187	1	1	-0.247384	0.00417256	1	1
16	protein_coding	ENSG00000102977	ACD	4	0	1	-7	15	8	0.29	0.139	1	0	-0.0449645	0.832707	1	0	0.347	0.322264	1	0	-0.294954	0.152918	1	0	---	---	0	0	-0.135013	0.0865967	1	0	0.0213057	0.972771	1	0	-0.593	0.000945	1	1	-0.0334071	0.934648	1	0	-0.370174	0.0656764	1	0
1	protein_coding	ENSG00000097021	ACOT7	4	1	1	2	16	8	-0.0652	0.743	1	0	2.47956	0.0002054	1	1	-0.332	0.285417	1	0	-1.13718	4.33341e-23	1	1	0.0726	0.435	1	0	-0.169716	0.121642	1	0	-0.251441	0.508082	1	0	-0.528	0.0013	1	1	-0.223017	0.344588	1	0	-0.446425	4.44482e-05	1	1
2	protein_coding	ENSG00000115091	ACTR3	4	0	0	-4	16	8	-0.105	0.391	1	0	0.788775	0.0044542	1	1	0.291	0.270846	1	0	0.127796	0.253519	1	0	0.157	0.0623	1	0	-0.0112186	0.885679	1	0	-0.641735	0.010806	1	-1	-0.275	0.0564	1	0	-0.42885	0.00658076	1	1	-0.309125	1.67101e-06	1	1
20	protein_coding	ENSG00000196839	ADA	4	0	0	12	16	8	0.566	0.00844	1	1	1.1876	0.0109343	1	1	0.186	0.683435	1	0	0.420305	0.0701798	1	0	0.00457	0.934	1	0	0.270021	0.0056679	1	-1	0.602206	0.111572	1	0	-0.0353	0.81	1	0	0.526193	0.0614047	1	0	0.327522	0.0800347	1	0
5	protein_coding	ENSG00000049192	ADAMTS6	4	1	0	-5	13	6	-0.0248	0.895	1	0	-0.505077	0.0354928	1	-1	-0.429	0.148603	1	0	-1.27222	1.18168e-09	1	1	---	---	0	0	0.140953	0.062368	1	0	0.610649	0.0442432	1	1	0.198	0.212	1	0	-1.10052	0.00250587	1	1	-0.953463	4.45983e-06	1	1
7	protein_coding	ENSG00000164742	ADCY1	4	0	0	-1	12	4	0.173	0.3	1	0	0.551813	0.0647888	1	0	-0.301	0.31369	1	0	-2.31032	2.79258e-06	1	1	0.0991	0.457	1	0	0.0051848	0.940659	1	0	3.25987	1.6051e-17	1	1	0.0529	0.708	1	0	---	---	0	0	---	---	0	0
2	protein_coding	ENSG00000075340	ADD2	4	0	0	-2	12	4	0.102	0.322	1	0	-0.411939	0.144256	1	0	0.286	0.265896	1	0	0.714715	0.830787	1	0	0.385	0.118	1	0	0.0610839	0.691637	1	0	5.2664	1.31985e-05	1	1	-0.0758	0.628	1	0	---	---	0	0	---	---	0	0
1	protein_coding	ENSG00000159346	ADIPOR1	4	0	0	0	16	8	0.3	0.317	1	0	0.169434	0.503064	1	0	-0.919	0.019089	1	1	-1.60078	3.45681e-71	1	1	-0.266	4.01e-05	1	1	0.0036387	0.960835	1	0	0.51717	0.038702	1	1	0.17	0.152	1	0	-0.0250035	0.91694	1	0	0.0554755	0.573302	1	0
11	protein_coding	ENSG00000148926	ADM	4	0	0	5	16	8	1.39	4.85e-05	1	1	-3.80347	6.08e-05	1	-1	-2.7	0.001534	1	1	-4.3848	1.42655e-11	1	1	-0.485	0.002	1	1	-0.235749	0.0052423	1	1	1.36447	5.9262e-09	1	1	0.502	0.00285	1	-1	-0.520244	0.171478	1	0	-0.141468	0.661464	1	0
18	protein_coding	ENSG00000101544	ADNP2	4	0	0	-8	15	7	-0.0623	0.576	1	0	0.254939	0.260626	1	0	0.217	0.438099	1	0	-0.241027	0.0392823	1	1	-0.0996	0.218	1	0	-0.0139095	0.849701	1	0	0.465462	0.175522	1	0	0.0752	0.608	1	0	-0.597474	0.00134891	1	1	-0.369988	0.00105496	1	1
20	protein_coding	ENSG00000130706	ADRM1	4	1	1	3	16	8	0.333	0.00995	1	1	0.598802	0.0247522	1	1	0.334	0.223937	1	0	-0.0789775	0.605436	1	0	-0.273	0.0648	1	0	-0.0948707	0.257332	1	0	0.111226	0.772767	1	0	0.0311	0.854	1	0	-0.295877	0.0743067	1	0	-0.332404	6.66705e-05	1	1
12	protein_coding	ENSG00000139154	AEBP2	4	1	0	1	14	8	---	---	0	0	-1.22365	0.0009145	1	-1	-1.13	0.005421	1	1	-0.381663	0.00617624	1	1	-0.401	0.00011	1	1	-0.291273	0.00247677	1	1	-0.517132	0.0702638	1	0	---	---	0	0	-0.235032	0.362246	1	0	-0.165046	0.251792	1	0
8	protein_coding	ENSG00000155189	AGPAT5	4	0	0	-11	16	8	-0.525	0.0388	1	-1	-0.706226	0.0790765	1	0	0.632	0.177975	1	0	-1.64352	6.84685e-51	1	1	-0.197	0.367	1	0	0.0940036	0.326838	1	0	-0.193318	0.646756	1	0	-0.0628	0.636	1	0	-0.730953	5.90501e-07	1	1	-0.563936	1.76654e-10	1	1
13	protein_coding	ENSG00000023516	AKAP11	4	0	0	-3	16	8	-0.0668	0.825	1	0	0.466745	0.265958	1	0	0.268	0.621233	1	0	-0.0531597	0.744138	1	0	-0.128	0.321	1	0	0.0106731	0.893071	1	0	0.487879	0.0772034	1	0	0.0127	0.946	1	0	-0.481773	0.00128598	1	1	-0.471995	8.28193e-08	1	1
10	protein_coding	ENSG00000187134	AKR1C1	4	1	1	3	13	7	0.468	0.0115	1	1	2.05875	0.0088279	1	1	-2.91	0.001499	1	1	-2.95753	8.03044e-08	1	1	-0.0706	0.38	1	0	---	---	0	0	0.160431	0.90354	1	0	0.169	0.286	1	0	1.18185	5.91673e-13	1	-1	1.03117	9.43572e-27	1	-1
9	protein_coding	ENSG00000137124	ALDH1B1	4	0	0	-1	16	8	-0.324	0.0134	1	-1	0.164375	0.434797	1	0	-0.152	0.5583	1	0	-1.17072	2.94833e-07	1	1	-0.119	0.0237	1	1	0.007464	0.921321	1	0	0.46769	0.0993758	1	0	-0.324	0.0143	1	1	-0.171284	0.422989	1	0	-0.0346325	0.835039	1	0
12	protein_coding	ENSG00000189046	ALKBH2	4	0	0	-6	13	8	---	---	0	0	-0.0644821	0.790846	1	0	0.355	0.157907	1	0	0.0255788	0.943804	1	0	---	---	0	0	-0.40355	0.0007917	1	1	-0.910619	0.0574379	1	0	---	---	0	0	0.390034	0.189883	1	0	0.593138	0.00164938	1	-1
2	protein_coding	ENSG00000116127	ALMS1	4	0	0	-6	16	8	0.209	0.104	1	0	-0.768315	0.0061282	1	-1	1.12	0.006134	1	-1	0.09337	0.676509	1	0	-0.116	0.0231	1	1	0.0959554	0.27107	1	0	0.727461	0.0335067	1	1	0.171	0.144	1	0	-0.703797	0.00339208	1	1	-0.664899	4.07737e-05	1	1
17	protein_coding	ENSG00000179477	ALOX12B	4	0	0	3	12	4	0.125	0.634	1	0	1.5975	0.000908	1	1	-4.24	0.001258	1	1	-2.8382	6.93445e-10	1	1	0.024	0.702	1	0	-0.154923	0.164249	1	0	3.13649	0.0418245	1	1	-0.0829	0.569	1	0	---	---	0	0	---	---	0	0
17	protein_coding	ENSG00000179593	ALOX15B	4	1	0	0	13	5	0.933	0.00668	1	1	1.50767	0.0005396	1	1	-3.5	0.001552	1	1	-2.33526	1.0368e-88	1	1	-0.0334	0.689	1	0	0.0552902	0.591072	1	0	6.30114	1.42498e-09	1	1	-0.385	0.0126	1	1	0.77608	0.0102806	1	-1	0.677777	0.00486397	1	-1
6	protein_coding	ENSG00000123505	AMD1	4	0	0	-8	16	8	-0.0871	0.446	1	0	-0.388545	0.0721383	1	0	0.365	0.222576	1	0	-0.866837	2.21311e-19	1	1	-0.0208	0.832	1	0	-0.0061078	0.940851	1	0	-0.618802	0.00786499	1	-1	0.0929	0.494	1	0	-0.729345	6.67574e-08	1	1	-0.606017	2.87159e-14	1	1
12	protein_coding	ENSG00000139211	AMIGO2	4	0	0	-1	16	8	-0.159	0.41	1	0	0.613995	0.013709	1	1	0.127	0.693108	1	0	-3.77985	2.2603e-72	1	1	-0.461	0.00929	1	1	1.11072	0.00018339	1	-1	-3.10743	8.70826e-37	1	-1	-2.31	2.46e-05	1	1	0.130999	0.540748	1	0	0.365981	0.000177812	1	-1
12	protein_coding	ENSG00000196510	ANAPC7	4	0	0	-3	13	8	---	---	0	0	0.989423	0.002153	1	1	2.45	0.00205	1	-1	0.185542	0.235392	1	0	---	---	0	0	-0.179831	0.0115032	1	1	-0.0731809	0.871078	1	0	---	---	0	0	-0.0760952	0.76997	1	0	-0.079602	0.602214	1	0
6	protein_coding	ENSG00000135299	ANKRD6	4	0	0	0	16	8	0.0927	0.538	1	0	-0.0809537	0.732786	1	0	0.307	0.274781	1	0	-0.124509	0.803713	1	0	-0.0544	0.336	1	0	-0.0655451	0.504883	1	0	2.52745	5.91756e-09	1	1	0.073	0.602	1	0	-0.520398	0.521229	1	0	-0.313232	0.543982	1	0
6	protein_coding	ENSG00000064999	ANKS1A	4	1	0	1	15	8	0.134	0.219	1	0	-0.00767891	0.973539	1	0	0.122	0.671449	1	0	-0.101842	0.492605	1	0	---	---	0	0	-0.180225	0.0404467	1	1	0.632143	0.0252931	1	1	0.148	0.319	1	0	-0.274741	0.299712	1	0	-0.35037	0.0240805	1	1
11	protein_coding	ENSG00000131620	ANO1	4	0	1	0	16	8	0.551	0.00418	1	1	0.636536	0.0206668	1	1	-0.544	0.39317	1	0	-1.83468	2.31254e-11	1	1	0.402	0.00289	1	-1	0.332934	0.00138354	1	-1	1.55958	0.643255	1	0	-0.121	0.363	1	0	-1.38205	0.54577	1	0	-0.868049	0.452261	1	0
9	protein_coding	ENSG00000136938	ANP32B	4	0	0	-11	16	8	-0.24	0.0462	1	-1	-0.950145	0.0022793	1	-1	-0.493	0.176936	1	0	-0.985733	1.25697e-11	1	1	0.0125	0.949	1	0	-0.233029	0.0103114	1	1	-0.640144	0.0484024	1	-1	-0.545	0.00113	1	1	-0.4032	0.010651	1	1	-0.229304	0.00174183	1	1
19	protein_coding	ENSG00000072958	AP1M1	4	0	0	-2	14	8	---	---	0	0	0.810859	0.0061306	1	1	-0.0156	0.965889	1	0	-0.116916	0.429535	1	0	-0.0112	0.884	1	0	-0.141247	0.0612815	1	0	0.315996	0.364629	1	0	---	---	0	0	-0.372485	0.0205905	1	1	-0.32746	0.000657829	1	1
X	protein_coding	ENSG00000182287	AP1S2	4	0	0	2	16	8	-0.168	0.317	1	0	-0.393955	0.0968149	1	0	-0.222	0.468788	1	0	0.144167	0.644274	1	0	0.192	0.298	1	0	-0.61783	0.00034657	1	1	-0.621901	0.0238069	1	-1	-0.126	0.336	1	0	-0.705153	0.0498051	1	1	-0.317863	0.16283	1	0
22	protein_coding	ENSG00000244509	APOBEC3C	4	0	0	14	16	8	0.272	0.103	1	0	0.100499	0.652363	1	0	0.0292	0.92846	1	0	0.161266	0.276476	1	0	0.0468	0.676	1	0	-0.233852	0.0184505	1	1	0.580846	0.0264813	1	1	-0.0352	0.839	1	0	-0.392743	0.069618	1	0	-0.0574443	0.639406	1	0
12	protein_coding	ENSG00000136044	APPL2	4	0	1	2	16	8	-0.106	0.582	1	0	3.58555	8.32e-05	1	1	-0.482	0.083755	1	0	-2.30246	1.19349e-63	1	1	-0.0548	0.597	1	0	-0.251202	0.00693465	1	1	-0.0930611	0.805903	1	0	-0.334	0.0247	1	1	-0.0586816	0.854571	1	0	0.12235	0.430233	1	0
15	protein_coding	ENSG00000103569	AQP9	4	0	0	1	9	1	0.353	0.0157	1	1	1.15448	0.0042155	1	1	-2.37	0.002266	1	1	-2.71746	2.45391e-107	1	1	-0.0106	0.864	1	0	0.0394709	0.733222	1	0	---	---	0	0	-0.204	0.165	1	0	---	---	0	0	---	---	0	0
11	protein_coding	ENSG00000175220	ARHGAP1	4	0	0	1	16	8	0.385	0.0155	1	1	-0.269531	0.269038	1	0	-0.531	0.070214	1	0	-0.0123214	0.945274	1	0	0.158	0.135	1	0	-0.372436	0.00081074	1	1	-0.267073	0.402969	1	0	-0.592	0.000724	1	1	0.0268316	0.908225	1	0	0.0959199	0.344636	1	0
3	protein_coding	ENSG00000177479	ARIH2	4	1	0	2	16	8	-0.487	0.0201	1	-1	2.22338	0.0002482	1	1	0.978	0.007073	1	-1	-0.638246	9.65558e-07	1	1	-0.0431	0.554	1	0	-0.154037	0.0474241	1	1	0.563408	0.049729	1	1	-0.616	0.00243	1	1	-0.220217	0.215385	1	0	-0.215153	0.0242338	1	1
16	protein_coding	ENSG00000102931	ARL2BP	4	0	0	1	16	8	-0.365	0.0894	1	0	1.24436	0.0013577	1	1	-0.351	0.577469	1	0	1.11896	6.40515e-09	1	-1	-0.233	0.0776	1	0	-0.747489	0.00018339	1	1	0.152378	0.695933	1	0	-0.0841	0.529	1	0	-0.996887	6.87597e-12	1	1	-0.955116	6.41508e-27	1	1
10	protein_coding	ENSG00000165997	ARL5B	4	0	1	-1	14	8	---	---	0	0	-0.712901	0.006955	1	-1	-1.51	0.002411	1	1	-1.30444	1.39013e-34	1	1	-0.0295	0.747	1	0	0.0597366	0.352475	1	0	0.102692	0.845764	1	0	---	---	0	0	-0.819132	6.61541e-05	1	1	-0.7827	3.65456e-10	1	1
3	protein_coding	ENSG00000113966	ARL6	4	0	0	-4	14	8	---	---	0	0	0.63193	0.0931127	1	0	0.35	0.409226	1	0	0.224943	0.533761	1	0	0.00173	0.983	1	0	0.0263229	0.832479	1	0	0.132583	0.84103	1	0	---	---	0	0	-0.839283	0.0127827	1	1	-0.76475	0.000462427	1	1
8	protein_coding	ENSG00000129691	ASH2L	4	0	0	1	16	8	-0.213	0.0821	1	0	0.581573	0.114936	1	0	0.577	0.182355	1	0	0.721328	2.60981e-08	1	-1	-0.137	0.0401	1	1	-0.225224	0.00502873	1	1	0.0671323	0.875248	1	0	-0.00842	0.96	1	0	-0.617387	0.000139643	1	1	-0.588946	1.23069e-08	1	1
7	protein_coding	ENSG00000070669	ASNS	4	0	0	-3	14	8	---	---	0	0	0.412366	0.0857213	1	0	0.0298	0.915252	1	0	-2.98614	1.68135e-07	1	1	-0.435	0.00154	1	1	-0.0979422	0.232717	1	0	0.961738	0.339101	1	0	---	---	0	0	0.79763	0.708601	1	0	0.380089	0.811324	1	0
2	protein_coding	ENSG00000143970	ASXL2	4	0	0	-2	15	8	0.134	0.584	1	0	0.65754	0.0088698	1	1	0.765	0.015859	1	-1	0.227339	0.0688745	1	0	---	---	0	0	-0.230716	0.00695211	1	1	0.455658	0.0829301	1	0	0.0974	0.474	1	0	-0.555039	0.00107121	1	1	-0.578141	5.84652e-08	1	1
1	protein_coding	ENSG00000125703	ATG4C	4	0	0	-7	14	8	---	---	0	0	-0.102934	0.807512	1	0	0.924	0.074364	1	0	0.0913306	0.824298	1	0	-0.139	0.0163	1	1	-0.219057	0.0168917	1	1	-0.698947	0.147833	1	0	---	---	0	0	-0.863944	0.00762191	1	1	-0.348519	0.198174	1	0
12	protein_coding	ENSG00000111676	ATN1	4	1	0	0	16	8	0.108	0.448	1	0	0.440416	0.0553788	1	0	-0.276	0.323275	1	0	-0.81367	2.00874e-10	1	1	0.0192	0.812	1	0	-0.271909	0.00870577	1	1	0.221915	0.513337	1	0	-0.783	0.000977	1	1	0.32379	0.0717492	1	0	0.201102	0.051855	1	0
4	protein_coding	ENSG00000145246	ATP10D	4	1	1	5	15	8	1.55	2.15e-05	1	1	0.753731	0.0142031	1	1	-0.826	0.02413	1	1	-0.0405023	0.813437	1	0	---	---	0	0	0.260273	0.00802038	1	-1	0.221881	0.471782	1	0	-0.384	0.00893	1	1	-0.277005	0.344679	1	0	-0.253303	0.161617	1	0
3	protein_coding	ENSG00000133657	ATP13A3	4	0	0	0	16	8	0.406	0.0139	1	1	-0.881484	0.0096196	1	-1	-0.804	0.032852	1	1	-1.79163	1.19772e-81	1	1	-0.0708	0.69	1	0	0.433198	0.00119956	1	-1	0.852622	7.90466e-05	1	1	0.094	0.495	1	0	-0.619825	3.29385e-06	1	1	-0.514131	1.30293e-11	1	1
3	protein_coding	ENSG00000069849	ATP1B3	4	0	0	0	16	8	0.00575	0.977	1	0	0.811135	0.0160205	1	1	-0.262	0.408139	1	0	-0.955739	1.9713e-19	1	1	0.0759	0.684	1	0	-0.141711	0.0353321	1	1	-0.369517	0.187888	1	0	-0.195	0.111	1	0	-0.146342	0.409179	1	0	-0.0260186	0.829809	1	0
3	protein_coding	ENSG00000164053	ATRIP	4	0	1	0	12	8	---	---	0	0	---	---	0	0	---	---	0	0	-0.100661	0.734193	1	0	-0.0401	0.618	1	0	-0.155835	0.0404673	1	1	0.632059	0.0783786	1	0	---	---	0	0	-0.445047	0.109315	1	0	-0.795632	2.80512e-05	1	1
4	protein_coding	ENSG00000138686	BBS7	4	0	0	12	16	8	0.427	0.131	1	0	-1.39212	0.0018452	1	-1	0.275	0.342668	1	0	-0.185892	0.367683	1	0	0.0626	0.15	1	0	-0.187292	0.0207683	1	1	0.933427	0.000449059	1	1	-0.43	0.023	1	1	-0.16857	0.579671	1	0	-0.139853	0.421765	1	0
19	protein_coding	ENSG00000187244	BCAM	4	1	0	2	16	8	0.525	0.00317	1	1	-0.710296	0.0073888	1	-1	-1.34	0.022754	1	1	-2.56301	7.69474e-62	1	1	-0.0375	0.425	1	0	-0.212083	0.0118207	1	1	2.25157	5.99817e-25	1	1	0.0213	0.911	1	0	0.497659	0.233726	1	0	0.185652	0.564223	1	0
11	protein_coding	ENSG00000197580	BCO2	4	0	0	2	14	8	---	---	0	0	1.18008	0.0033981	1	1	-1.18	0.0057	1	1	-4.47714	5.09759e-21	1	1	-0.0273	0.748	1	0	-0.257436	0.0454877	1	1	1.40807	0.133031	1	0	---	---	0	0	1.31957	0.352098	1	0	0.567076	0.602753	1	0
14	protein_coding	ENSG00000100739	BDKRB1	4	1	1	4	10	6	---	---	0	0	---	---	0	0	---	---	0	0	-2.26707	0.000135059	1	1	0.00102	0.99	1	0	-0.0099589	0.918638	1	0	-1.22703	0.154073	1	0	---	---	0	0	0.576077	0.410053	1	0	-0.0117087	0.984487	1	0
12	protein_coding	ENSG00000184992	BRI3BP	4	0	0	-10	14	8	---	---	0	0	0.478748	0.0337827	1	1	1.27	0.006311	1	-1	0.129522	0.448106	1	0	-0.197	0.00843	1	1	0.287373	0.00645479	1	-1	0.0863835	0.845163	1	0	---	---	0	0	-0.535756	0.000434381	1	1	-0.782725	7.24505e-17	1	1
17	protein_coding	ENSG00000136492	BRIP1	4	0	0	-15	16	8	0.287	0.198	1	0	-0.787719	0.0297358	1	-1	0.883	0.106807	1	0	-0.759471	9.28689e-05	1	1	0.0275	0.84	1	0	0.288504	0.0214008	1	-1	-0.196348	0.647781	1	0	-0.49	0.0108	1	1	-1.22788	1.83609e-08	1	1	-1.59853	1.18495e-27	1	1
14	protein_coding	ENSG00000100916	BRMS1L	4	1	0	12	14	8	---	---	0	0	-0.502864	0.062058	1	0	0.278	0.416845	1	0	-0.0157628	0.973632	1	0	-0.136	0.125	1	0	-0.451017	0.0177128	1	1	-0.11358	0.804785	1	0	---	---	0	0	-0.713943	0.0219068	1	1	-0.490739	0.00966987	1	1
X	protein_coding	ENSG00000165288	BRWD3	4	0	0	1	13	7	---	---	0	0	1.37802	0.0015834	1	1	-0.854	0.069819	1	0	-0.236933	0.0716307	1	0	-0.0537	0.218	1	0	-0.205167	0.0150981	1	1	0.733226	0.0367715	1	1	---	---	0	0	-0.181944	0.530512	1	0	-0.256029	0.10963	1	0
10	protein_coding	ENSG00000166167	BTRC	4	1	1	-1	16	8	0.086	0.52	1	0	1.44139	0.000871	1	1	-0.343	0.204052	1	0	-0.353996	0.00442841	1	1	0.0291	0.786	1	0	-0.812479	0.00013818	1	1	0.742587	0.0087475	1	1	-0.0737	0.558	1	0	-0.131884	0.678235	1	0	-0.235889	0.159735	1	0
11	protein_coding	ENSG00000110696	C11orf58	4	0	0	1	14	8	---	---	0	0	0.27209	0.246016	1	0	0.428	0.255943	1	0	0.184101	0.157495	1	0	0.0645	0.527	1	0	-0.823971	0.00290167	1	1	-0.433578	0.156705	1	0	---	---	0	0	-0.551504	0.00187439	1	1	-0.315454	3.41572e-05	1	1
16	protein_coding	ENSG00000182831	C16orf72	4	0	0	-2	14	8	---	---	0	0	-1.08032	0.0014348	1	-1	-1.82	0.002266	1	1	-1.45797	1.25539e-57	1	1	0.00642	0.964	1	0	-0.145927	0.0291869	1	1	-0.000563761	0.998845	1	0	---	---	0	0	-0.958468	1.25205e-08	1	1	-0.725196	5.35205e-12	1	1
17	protein_coding	ENSG00000125319	C17orf53	4	1	0	-9	16	8	0.147	0.357	1	0	0.224943	0.248223	1	0	-0.45	0.132593	1	0	-1.12506	2.88794e-05	1	1	-0.00543	0.978	1	0	0.318346	0.00558666	1	-1	0.786979	0.035062	1	1	-0.161	0.238	1	0	-0.710519	0.135795	1	0	-1.55872	3.16433e-07	1	1
18	protein_coding	ENSG00000166845	C18orf54	4	0	0	-13	14	8	---	---	0	0	-0.501835	0.0307789	1	-1	0.64	0.136193	1	0	-0.824919	0.000775109	1	1	-0.0666	0.258	1	0	0.0056945	0.954165	1	0	0.0746156	0.901024	1	0	---	---	0	0	-1.59613	1.69208e-10	1	1	-1.96615	7.05998e-26	1	1
1	protein_coding	ENSG00000198854	C1orf68	4	1	0	1	9	2	0.237	0.183	1	0	1.91895	0.0003724	1	1	-0.211	0.452518	1	0	-9.98369	1.2892e-10	1	1	---	---	0	0	-0.54436	0.00122769	1	1	8.57048	9.57454e-07	1	1	-0.0527	0.731	1	0	---	---	0	0	---	---	0	0
3	protein_coding	ENSG00000114529	C3orf52	4	0	1	5	16	8	0.399	0.0112	1	1	0.784259	0.0214194	1	1	-0.191	0.568872	1	0	0.237372	0.414361	1	0	-0.388	0.000628	1	1	0.519787	0.00088667	1	-1	0.893288	0.00101949	1	1	0.879	0.000168	1	-1	0.224845	0.695236	1	0	0.39535	0.206372	1	0
3	protein_coding	ENSG00000163689	C3orf67	4	0	0	2	13	8	---	---	0	0	-2.55953	0.0002675	1	-1	-2.31	0.002361	1	1	-2.07396	6.09463e-21	1	1	---	---	0	0	0.0648121	0.409773	1	0	-0.225907	0.764326	1	0	---	---	0	0	-0.77498	0.111858	1	0	-0.810085	0.00090791	1	1
14	protein_coding	ENSG00000198668	CALM1	4	1	0	1	16	8	0.588	0.0023	1	1	3.30564	0.0002217	1	1	0.734	0.01532	1	-1	0.110442	0.305585	1	0	0.143	0.0776	1	0	-0.142394	0.041078	1	1	-0.21682	0.454411	1	0	-0.35	0.0107	1	1	-0.649057	3.24362e-07	1	1	-0.693796	2.47978e-28	1	1
11	protein_coding	ENSG00000014216	CAPN1	4	1	1	10	16	8	0.207	0.181	1	0	-0.174015	0.370765	1	0	-0.00631	0.985009	1	0	-0.293457	0.00136783	1	1	0.216	0.0894	1	0	-0.325907	0.00148271	1	1	0.174754	0.592432	1	0	0.0635	0.65	1	0	-0.000938884	0.99747	1	0	-0.0365977	0.712576	1	0
16	protein_coding	ENSG00000256812	CAPNS2	4	1	1	-1	9	4	---	---	0	0	-0.692474	0.0093017	1	-1	-2.96	0.001557	1	1	-0.346527	0.0512147	1	0	---	---	0	0	-1.58217	1.518e-05	1	1	0.412519	0.913997	1	0	---	---	0	0	---	---	0	0	---	---	0	0
17	protein_coding	ENSG00000177469	CAVIN1	4	0	1	-1	16	8	0.284	0.491	1	0	1.73081	0.0023056	1	1	0.351	0.153579	1	0	-0.846472	8.86445e-20	1	1	-0.0493	0.794	1	0	-0.177408	0.0414645	1	1	-0.579007	0.0242929	1	-1	-0.164	0.256	1	0	0.0825302	0.637098	1	0	0.0480847	0.560976	1	0
16	protein_coding	ENSG00000067955	CBFB	4	0	0	-5	16	8	0.31	0.0576	1	0	0.582988	0.124823	1	0	1.27	0.004455	1	-1	0.460156	4.4912e-05	1	-1	0.108	0.473	1	0	-0.23004	0.00726491	1	1	-0.342622	0.351889	1	0	-0.317	0.0243	1	1	-0.56187	0.000305121	1	1	-0.483554	7.3617e-07	1	1
2	protein_coding	ENSG00000163006	CCDC138	4	0	0	-13	14	8	---	---	0	0	-0.231988	0.240335	1	0	0.586	0.098843	1	0	0.733019	0.0287212	1	-1	-0.141	0.00204	1	1	-0.0236348	0.794513	1	0	-0.233239	0.779969	1	0	---	---	0	0	-0.676418	0.0204774	1	1	-0.771908	0.000294468	1	1
2	protein_coding	ENSG00000144395	CCDC150	4	0	0	-17	13	8	---	---	0	0	0.799594	0.0050167	1	1	-0.249	0.39487	1	0	-1.32326	0.047468	1	1	---	---	0	0	0.327483	0.0073229	1	-1	0.263256	0.654761	1	0	---	---	0	0	-0.930845	0.0333645	1	1	-1.69702	6.17349e-11	1	1
12	protein_coding	ENSG00000120647	CCDC77	4	0	0	-12	14	8	---	---	0	0	-0.0833975	0.75835	1	0	0.261	0.311928	1	0	0.0216008	0.961283	1	0	-0.029	0.647	1	0	-0.123439	0.0545175	1	0	-0.484513	0.28382	1	0	---	---	0	0	-1.0152	0.000731498	1	1	-0.982042	3.24467e-06	1	1
13	protein_coding	ENSG00000133101	CCNA1	4	0	0	0	14	6	-0.453	0.0276	1	-1	-0.298282	0.1293	1	0	-0.249	0.606835	1	0	-2.98899	4.25608e-08	1	1	-0.023	0.744	1	0	-0.0403937	0.760787	1	0	2.15595	0.064839	1	0	-0.841	0.00128	1	1	0.118806	0.790016	1	0	0.304278	0.220369	1	0
12	protein_coding	ENSG00000129315	CCNT1	4	0	0	3	16	8	0.00543	0.978	1	0	0.271814	0.211264	1	0	-0.293	0.347963	1	0	-0.480796	6.07316e-05	1	1	-0.0514	0.629	1	0	0.176082	0.0251119	1	-1	0.482579	0.182102	1	0	0.0175	0.923	1	0	-0.474191	0.0115676	1	1	-0.387637	0.000462427	1	1
12	protein_coding	ENSG00000166226	CCT2	4	0	0	-4	16	8	-0.18	0.084	1	0	3.60021	8.86e-05	1	1	1.33	0.004943	1	-1	-0.242523	0.0487404	1	1	-0.496	0.00205	1	1	-0.0402961	0.487094	1	0	-0.589329	0.0108322	1	-1	-0.0346	0.809	1	0	-0.28515	0.065232	1	0	-0.229995	0.000738677	1	1
16	protein_coding	ENSG00000169217	CD2BP2	4	0	0	0	16	8	0.22	0.107	1	0	0.728742	0.0075134	1	1	0.487	0.078246	1	0	-0.579281	9.95089e-08	1	1	0.124	0.0306	1	-1	-0.269052	0.00682499	1	1	0.224423	0.515897	1	0	-0.0961	0.471	1	0	-0.578125	0.00210447	1	1	-0.380159	0.00098723	1	1
17	protein_coding	ENSG00000004897	CDC27	4	0	0	-10	16	8	0.0937	0.529	1	0	-1.05233	0.0015674	1	-1	-0.867	0.14311	1	0	-0.653007	3.56997e-08	1	1	-0.0832	0.471	1	0	-0.193647	0.0421077	1	1	-0.1814	0.65124	1	0	0.127	0.32	1	0	-0.621331	2.93666e-05	1	1	-0.696246	2.59452e-17	1	1
17	protein_coding	ENSG00000094804	CDC6	4	0	0	-13	15	8	-0.173	0.238	1	0	0.138118	0.453641	1	0	1.18	0.004865	1	-1	-0.952933	1.89055e-07	1	1	---	---	0	0	0.242621	0.0146378	1	-1	0.389131	0.22078	1	0	-2.02	1.11e-05	1	1	-0.925509	1.39549e-07	1	1	-1.63058	3.26144e-35	1	1
7	protein_coding	ENSG00000105810	CDK6	4	0	1	-3	16	8	-0.174	0.163	1	0	1.15962	0.0012236	1	1	-0.614	0.053312	1	0	-1.33157	2.02904e-49	1	1	0.046	0.364	1	0	0.0278101	0.704245	1	0	1.05594	0.000960704	1	1	-0.14	0.36	1	0	-0.0924455	0.642483	1	0	0.066204	0.395355	1	0
6	protein_coding	ENSG00000145996	CDKAL1	4	0	0	-8	16	8	-0.0433	0.829	1	0	-0.0973741	0.601002	1	0	-0.281	0.503219	1	0	0.20284	0.331707	1	0	0.0783	0.356	1	0	-0.243147	0.0040654	1	1	0.564364	0.157073	1	0	-0.0261	0.929	1	0	-0.392064	0.226363	1	0	-0.697735	0.000916303	1	1
3	protein_coding	ENSG00000091527	CDV3	4	0	0	-7	16	8	-0.575	0.00156	1	-1	0.437344	0.0746563	1	0	-0.623	0.068386	1	0	-0.685248	2.38759e-12	1	1	0.29	0.095	1	0	-0.0722759	0.281884	1	0	-0.0271136	0.945518	1	0	0.188	0.141	1	0	-0.325725	0.0421123	1	1	-0.176355	0.0196139	1	1
19	protein_coding	ENSG00000245848	CEBPA	4	1	1	2	14	7	-0.394	0.00387	1	-1	1.93093	0.0006613	1	1	-0.903	0.04053	1	1	-0.614642	0.000406055	1	1	---	---	0	0	-0.0748005	0.491207	1	0	0.79738	0.40699	1	0	-0.4	0.0061	1	1	0.439424	0.562855	1	0	0.640657	0.236121	1	0
2	protein_coding	ENSG00000115816	CEBPZ	4	0	1	-6	16	8	-0.00503	0.981	1	0	0.219182	0.237495	1	0	-0.0103	0.980438	1	0	0.0282852	0.879472	1	0	-0.0929	0.54	1	0	-0.272893	0.00787689	1	1	-0.00450358	0.99327	1	0	-0.0841	0.581	1	0	-0.597174	0.00057425	1	1	-0.331992	0.000553315	1	1
11	protein_coding	ENSG00000149187	CELF1	4	1	1	1	16	8	-0.292	0.074	1	0	-1.37741	0.0042563	1	-1	-0.849	0.025932	1	1	-0.048888	0.745252	1	0	0.0109	0.86	1	0	-0.133519	0.0414338	1	1	0.144792	0.683123	1	0	-0.495	0.00392	1	1	0.0703498	0.708641	1	0	0.0523426	0.587735	1	0
15	protein_coding	ENSG00000103888	CEMIP	4	1	1	3	13	6	1.87	0.000709	1	1	0.756777	0.111122	1	0	-0.841	0.128891	1	0	-4.79198	1.29695e-74	1	1	---	---	0	0	-0.318724	0.0190837	1	1	-4.64711	0.000247468	1	-1	-0.104	0.497	1	0	---	---	0	0	---	---	0	0
22	protein_coding	ENSG00000100162	CENPM	4	0	1	-13	16	8	-0.00446	0.988	1	0	0.219802	0.280435	1	0	0.273	0.257131	1	0	-0.878452	0.00739044	1	1	-0.132	0.135	1	0	0.195372	0.0338611	1	-1	-0.50209	0.230817	1	0	-1.2	6.1e-05	1	1	-1.1995	0.00498235	1	1	-1.55764	1.63825e-06	1	1
2	protein_coding	ENSG00000138092	CENPO	4	0	0	-16	16	8	0.0285	0.807	1	0	0.362235	0.184521	1	0	0.924	0.033109	1	-1	-0.617619	0.00704024	1	1	-0.0834	0.218	1	0	0.246665	0.0496727	1	-1	-0.0800224	0.893985	1	0	-0.193	0.18	1	0	-1.25865	1.46013e-09	1	1	-1.76962	2.20548e-32	1	1
18	protein_coding	ENSG00000101639	CEP192	4	0	0	-10	15	8	0.369	0.0664	1	0	-0.686613	0.0122377	1	-1	-0.143	0.584815	1	0	-0.441096	0.00051682	1	1	---	---	0	0	-0.268891	0.014917	1	1	-0.0569223	0.928784	1	0	-0.219	0.0749	1	0	-0.740145	0.000563712	1	1	-0.865852	8.03444e-10	1	1
11	protein_coding	ENSG00000166037	CEP57	4	0	0	-9	16	8	-0.404	0.00401	1	-1	-2.06392	0.0002758	1	-1	-1.02	0.006661	1	1	0.115943	0.510345	1	0	-0.0354	0.616	1	0	-0.526543	0.00078298	1	1	-0.65576	0.0250983	1	-1	-0.541	0.00131	1	1	-0.529866	0.00385736	1	1	-0.472088	2.84838e-06	1	1
12	protein_coding	ENSG00000173588	CEP83	4	0	0	-6	16	8	-0.572	0.0316	1	-1	-0.560436	0.0193112	1	-1	0.247	0.278352	1	0	-0.949	0.000301465	1	1	-0.266	0.00104	1	1	-0.138439	0.127595	1	0	-0.356781	0.462155	1	0	-0.305	0.0443	1	1	-0.467186	0.13089	1	0	-0.183323	0.430317	1	0
15	protein_coding	ENSG00000154227	CERS3	4	1	0	1	8	3	---	---	0	0	2.5642	0.0003704	1	1	-1.98	0.003341	1	1	-1.00392	2.32561e-22	1	1	---	---	0	0	-0.0861646	0.352284	1	0	---	---	0	0	---	---	0	0	---	---	0	0	---	---	0	0
19	protein_coding	ENSG00000090661	CERS4	4	1	1	3	11	4	0.00108	0.995	1	0	-0.295219	0.131865	1	0	-1.17	0.007779	1	1	0.228859	0.14977	1	0	---	---	0	0	-0.378321	0.00086547	1	1	4.01143	3.46798e-14	1	1	0.0729	0.632	1	0	---	---	0	0	---	---	0	0
2	protein_coding	ENSG00000172292	CERS6	4	1	1	-1	15	8	-0.196	0.0932	1	0	-3.04937	0.0001069	1	-1	-1.08	0.014187	1	1	-0.112608	0.430611	1	0	---	---	0	0	-0.009015	0.904516	1	0	0.898721	0.00836364	1	1	-0.302	0.0873	1	0	-0.284284	0.0832084	1	0	-0.150469	0.101742	1	0
16	protein_coding	ENSG00000070761	CFAP20	4	0	1	-2	16	8	-0.0462	0.711	1	0	0.00087221	0.996972	1	0	0.464	0.096236	1	0	0.0667911	0.747629	1	0	-0.253	0.00605	1	1	-0.182497	0.0241597	1	1	0.184828	0.611084	1	0	-0.576	0.00116	1	1	-0.144538	0.650084	1	0	-0.214704	0.275706	1	0
2	protein_coding	ENSG00000003402	CFLAR	4	1	1	7	15	7	1.15	0.00012	1	1	1.19658	0.0014353	1	1	-1.28	0.009107	1	1	-1.7596	1.46527e-82	1	1	0.0383	0.653	1	0	-0.580742	0.00122185	1	1	1.14044	3.71068e-06	1	1	0.302	0.0335	1	-1	0.112677	0.66114	1	0	0.169985	0.203278	1	0
3	protein_coding	ENSG00000163320	CGGBP1	4	0	0	1	15	8	-0.292	0.152	1	0	0.719645	0.0077286	1	1	0.463	0.072254	1	0	0.355201	0.00307285	1	-1	---	---	0	0	-0.359117	0.00185343	1	1	-0.130751	0.703552	1	0	0.0866	0.612	1	0	-0.380429	0.0273405	1	1	-0.332599	0.00189421	1	1
19	protein_coding	ENSG00000085872	CHERP	4	0	0	-2	16	8	0.437	0.0304	1	1	-0.403612	0.0555695	1	0	0.614	0.031112	1	-1	-0.424542	0.0375884	1	1	-0.0414	0.449	1	0	-0.377134	0.00141835	1	1	0.410182	0.179148	1	0	-0.217	0.164	1	0	0.00659553	0.980669	1	0	-0.100272	0.470437	1	0
3	protein_coding	ENSG00000163507	CIP2A	4	0	0	-15	14	8	---	---	0	0	-0.862245	0.003505	1	-1	0.311	0.185087	1	0	-1.0534	3.10354e-06	1	1	-0.0728	0.34	1	0	0.240833	0.00775612	1	-1	-0.448282	0.408774	1	0	---	---	0	0	-1.86416	1.90303e-23	1	1	-1.91505	2.96607e-53	1	1
3	protein_coding	ENSG00000114737	CISH	4	0	1	0	16	8	0.0419	0.756	1	0	0.621014	0.0124165	1	1	-0.974	0.00702	1	1	-2.0173	1.1927e-15	1	1	-0.0541	0.48	1	0	-0.0159818	0.884164	1	0	0.235949	0.895303	1	0	-0.155	0.256	1	0	0.572756	0.359076	1	0	0.663931	0.180576	1	0
3	protein_coding	ENSG00000163539	CLASP2	4	0	0	-6	15	8	0.165	0.348	1	0	-0.85866	0.0037817	1	-1	0.389	0.294372	1	0	-0.328521	0.00434913	1	1	---	---	0	0	-0.149635	0.0409309	1	1	-0.552117	0.0940423	1	0	-0.237	0.0701	1	0	-0.411649	0.0277919	1	1	-0.58039	7.18086e-08	1	1
6	protein_coding	ENSG00000213719	CLIC1	4	0	0	-3	16	8	0.125	0.215	1	0	-0.0235817	0.908231	1	0	-0.615	0.026901	1	1	-0.615196	3.61306e-11	1	1	0.29	0.00109	1	-1	0.184867	0.5652	1	0	-0.243772	0.406744	1	0	-0.23	0.0575	1	0	-0.437948	0.000586935	1	1	-0.504816	5.56057e-18	1	1
15	protein_coding	ENSG00000179335	CLK3	4	0	1	3	15	8	-0.103	0.637	1	0	-0.343226	0.0919581	1	0	-0.907	0.008566	1	1	-0.725455	4.02997e-07	1	1	---	---	0	0	-0.148052	0.0380817	1	1	0.535212	0.107054	1	0	0.048	0.758	1	0	0.13004	0.662381	1	0	-0.0603717	0.759777	1	0
11	protein_coding	ENSG00000162129	CLPB	4	0	0	-4	16	8	-0.23	0.397	1	0	0.305583	0.183393	1	0	-0.0881	0.777987	1	0	0.172889	0.248097	1	0	-0.0406	0.71	1	0	0.0682303	0.401743	1	0	0.304653	0.380611	1	0	-0.0749	0.59	1	0	-0.437705	0.00540201	1	1	-0.40053	7.8782e-06	1	1
16	protein_coding	ENSG00000103121	CMC2	4	0	0	-10	16	8	-0.0501	0.831	1	0	-0.19911	0.394252	1	0	0.0462	0.89741	1	0	-0.920466	1.32249e-08	1	1	-0.0552	0.53	1	0	-0.147189	0.032166	1	1	-0.437842	0.204584	1	0	-0.0697	0.598	1	0	-0.618694	0.0124853	1	1	-0.556046	0.000514873	1	1
1	protein_coding	ENSG00000143771	CNIH4	4	0	0	6	16	8	-0.125	0.445	1	0	-0.617019	0.0497294	1	-1	-0.37	0.288202	1	0	-0.517504	3.65998e-05	1	1	0.0381	0.609	1	0	0.412119	0.00064417	1	-1	0.578487	0.0206674	1	1	-0.303	0.0241	1	1	-0.547967	0.00023343	1	1	-0.534597	4.08206e-11	1	1
4	protein_coding	ENSG00000138767	CNOT6L	4	0	0	2	14	8	---	---	0	0	-1.35099	0.0023001	1	-1	-0.743	0.048847	1	1	-0.236453	0.116404	1	0	0.152	0.227	1	0	-0.357424	0.00159937	1	1	0.524485	0.105143	1	0	---	---	0	0	-0.497589	0.0205017	1	1	-0.348389	0.014082	1	1
2	protein_coding	ENSG00000144580	CNOT9	4	0	0	-11	16	8	-0.247	0.0367	1	-1	1.56772	0.0005411	1	1	1.17	0.013254	1	-1	0.214707	0.0910481	1	0	-0.253	0.0475	1	1	-0.0090231	0.887454	1	0	0.048595	0.910328	1	0	-0.291	0.0455	1	1	-0.115957	0.561669	1	0	-0.324725	0.000789097	1	1
1	protein_coding	ENSG00000162377	COA7	4	0	0	-3	16	8	-0.594	0.00699	1	-1	1.07674	0.0019787	1	1	1.09	0.012533	1	-1	-0.191542	0.327391	1	0	-0.304	0.000127	1	1	-0.484571	0.00046579	1	1	-0.224547	0.717426	1	0	0.000778	0.997	1	0	-0.23283	0.252254	1	0	-0.142581	0.333973	1	0
9	protein_coding	ENSG00000196739	COL27A1	4	1	0	10	14	8	---	---	0	0	0.959228	0.002592	1	1	-0.947	0.008066	1	1	-2.43133	1.86737e-21	1	1	-0.079	0.375	1	0	0.322118	0.0044649	1	-1	1.7452	8.97279e-08	1	1	---	---	0	0	1.22032	0.0872214	1	0	0.623443	0.0397868	1	-1
19	protein_coding	ENSG00000130309	COLGALT1	4	0	0	-9	15	8	-0.0192	0.924	1	0	0.333803	0.178921	1	0	-0.127	0.581334	1	0	-0.874952	2.08956e-19	1	1	---	---	0	0	0.502904	0.00117293	1	-1	-0.361793	0.241425	1	0	-0.53	0.00373	1	1	-0.0232203	0.921663	1	0	-0.194174	0.0216869	1	1
5	protein_coding	ENSG00000145781	COMMD10	4	0	0	-7	15	8	-0.337	0.0104	1	-1	2.44695	0.0005968	1	1	0.325	0.403706	1	0	0.220455	0.278022	1	0	---	---	0	0	-0.656283	0.00030828	1	1	-0.475512	0.200573	1	0	0.232	0.115	1	0	-0.903855	0.00362094	1	1	-0.605943	0.0102512	1	1
4	protein_coding	ENSG00000169019	COMMD8	4	0	0	-1	16	8	-0.0766	0.896	1	0	0.0478992	0.884369	1	0	0.562	0.09856	1	0	0.838436	7.36784e-09	1	-1	-0.68	2.16e-06	1	1	-0.415559	0.0010002	1	1	-0.534678	0.0614232	1	0	-0.701	0.0038	1	1	-0.908874	0.000597566	1	1	-0.545215	0.00069103	1	1
15	protein_coding	ENSG00000166200	COPS2	4	0	0	0	16	8	-0.16	0.357	1	0	-0.531629	0.149148	1	0	-0.0826	0.794225	1	0	-0.143809	0.409694	1	0	-0.17	0.152	1	0	-0.314349	0.0108021	1	1	-0.442481	0.0963872	1	0	-0.116	0.379	1	0	-0.683399	7.23454e-06	1	1	-0.511184	2.54687e-10	1	1
6	protein_coding	ENSG00000132423	COQ3	4	0	0	-5	16	8	0.0462	0.751	1	0	0.818943	0.0068863	1	1	0.511	0.060912	1	0	-1.00253	0.00160978	1	1	-0.26	0.000157	1	1	0.08848	0.491332	1	0	-0.351012	0.617327	1	0	0.185	0.126	1	0	-0.391374	0.273822	1	0	-0.276041	0.294765	1	0
15	protein_coding	ENSG00000103647	CORO2B	4	0	0	2	15	7	-0.00881	0.975	1	0	0.157287	0.616559	1	0	-0.0448	0.936421	1	0	0.388965	0.509773	1	0	0.255	0.0558	1	0	0.0761845	0.432715	1	0	0.585479	0.139164	1	0	-0.309	0.02	1	1	-2.31672	0.0136437	1	1	-2.18698	0.00134233	1	1
8	protein_coding	ENSG00000085719	CPNE3	4	0	0	3	16	8	0.28	0.0753	1	0	-1.07936	0.039443	1	-1	-1.56	0.086856	1	0	-0.125442	0.316598	1	0	0.0139	0.912	1	0	-0.641874	0.0003554	1	1	0.00116845	0.998164	1	0	-0.851	0.000168	1	1	-0.336826	0.0417632	1	1	-0.262773	0.000108087	1	1
3	protein_coding	ENSG00000080819	CPOX	4	0	0	-2	15	8	0.343	0.472	1	0	-1.14692	0.0030908	1	-1	-0.74	0.031337	1	1	-1.45489	5.58538e-25	1	1	---	---	0	0	0.0343078	0.621647	1	0	0.324202	0.322274	1	0	-0.0168	0.941	1	0	-0.547864	0.0418123	1	1	-0.459775	0.00507341	1	1
14	protein_coding	ENSG00000165934	CPSF2	4	0	0	-2	14	8	---	---	0	0	2.23635	0.0006787	1	1	0.854	0.036938	1	-1	0.0782768	0.588401	1	0	-0.0936	0.374	1	0	-0.191148	0.0279163	1	1	0.090618	0.817224	1	0	---	---	0	0	-0.320673	0.047209	1	1	-0.316948	0.000215195	1	1
7	protein_coding	ENSG00000160917	CPSF4	4	1	0	6	16	8	-0.199	0.115	1	0	0.382123	0.179634	1	0	0.162	0.582299	1	0	-0.28816	0.127817	1	0	0.0573	0.747	1	0	-0.300725	0.00152281	1	1	-0.467661	0.453077	1	0	-0.17	0.18	1	0	-0.111368	0.735381	1	0	-0.136585	0.48693	1	0
11	protein_coding	ENSG00000149532	CPSF7	4	0	0	-1	16	8	-0.127	0.359	1	0	0.463224	0.0359061	1	1	0.379	0.107193	1	0	-0.222438	0.110746	1	0	-0.211	0.172	1	0	-0.0233934	0.747446	1	0	0.218044	0.527331	1	0	-0.11	0.381	1	0	-0.18678	0.270884	1	0	-0.302241	0.00047205	1	1
17	protein_coding	ENSG00000108342	CSF3	4	0	1	0	11	4	1.64	4.89e-05	1	1	0.356994	0.14697	1	0	0.00307	0.99225	1	0	---	---	0	0	---	---	0	0	0.119777	0.370469	1	0	9.75556	3.29187e-09	1	1	-0.803	0.00043	1	1	-0.0250248	0.91797	1	0	-0.501387	1.51723e-10	1	1
5	protein_coding	ENSG00000113712	CSNK1A1	4	1	0	1	16	8	-0.402	0.0151	1	-1	2.08002	0.0002933	1	1	-0.671	0.026569	1	1	0.0198409	0.896786	1	0	-0.36	0.000213	1	1	-0.0630741	0.320232	1	0	0.0156554	0.972639	1	0	-0.173	0.138	1	0	-0.147934	0.396931	1	0	-0.171645	0.0440148	1	1
22	protein_coding	ENSG00000213923	CSNK1E	4	1	0	-1	16	8	0.181	0.102	1	0	0.820755	0.0049634	1	1	-0.48	0.187034	1	0	-1.82496	2.89899e-64	1	1	-0.11	0.162	1	0	0.0890117	0.130607	1	0	0.166594	0.660746	1	0	-0.146	0.24	1	0	0.286996	0.121599	1	0	0.055934	0.648885	1	0
16	protein_coding	ENSG00000070770	CSNK2A2	4	0	0	-2	16	8	-0.497	0.00863	1	-1	0.67085	0.008757	1	1	-0.524	0.063475	1	0	-0.443583	7.12555e-05	1	1	-0.0992	0.0934	1	0	-0.163311	0.0370279	1	1	0.0945467	0.806306	1	0	0.415	0.00563	1	-1	-0.30708	0.0529094	1	0	-0.261854	0.00258748	1	1
12	protein_coding	ENSG00000175183	CSRP2	4	1	1	-4	16	8	2.02	4.89e-05	1	1	-1.45459	0.0015087	1	-1	0.393	0.290612	1	0	0.956241	1.17613e-11	1	-1	-0.491	0.000246	1	1	-0.0653683	0.469491	1	0	0.686983	0.0392201	1	1	-0.913	0.000102	1	1	-0.722364	0.138948	1	0	-1.13199	0.000794513	1	1
7	protein_coding	ENSG00000172115	CYCS	4	0	0	1	12	8	---	---	0	0	---	---	0	0	---	---	0	0	0.132868	0.392568	1	0	-0.795	3.1e-06	1	1	-0.28809	0.016862	1	1	-0.0960635	0.808569	1	0	---	---	0	0	-0.548459	8.59459e-06	1	1	-0.447424	8.28957e-12	1	1
14	protein_coding	ENSG00000100592	DAAM1	4	1	1	0	16	8	1.3	0.00246	1	1	-2.79152	0.0001071	1	-1	-2.2	0.001557	1	1	-0.482176	2.19406e-06	1	1	-0.123	0.0948	1	0	-0.261381	0.00313827	1	1	1.125	0.00115056	1	1	-0.595	0.00571	1	1	-0.179178	0.355661	1	0	0.0221049	0.894871	1	0
2	protein_coding	ENSG00000115866	DARS	4	0	0	-2	16	8	-0.5	0.0156	1	-1	-1.20406	0.0011203	1	-1	-0.485	0.074272	1	0	-0.28785	0.0190652	1	1	-0.098	0.426	1	0	-0.355902	0.00138501	1	1	-0.408676	0.124613	1	0	-0.175	0.135	1	0	-0.349473	0.027892	1	1	-0.293856	0.000841345	1	1
1	protein_coding	ENSG00000117593	DARS2	4	0	0	-9	16	8	0.00312	0.986	1	0	0.508445	0.083986	1	0	0.371	0.115736	1	0	-0.334396	0.0497289	1	1	-0.0161	0.875	1	0	0.110923	0.0783511	1	0	-0.791825	0.0122412	1	-1	-0.152	0.201	1	0	-0.626063	6.75728e-05	1	1	-0.545483	5.22192e-09	1	1
6	protein_coding	ENSG00000204209	DAXX	4	0	0	-6	15	8	0.153	0.372	1	0	0.205256	0.304357	1	0	-0.0767	0.779261	1	0	-0.315975	0.0140773	1	1	---	---	0	0	-0.221423	0.031521	1	1	0.0780534	0.850962	1	0	0.0455	0.771	1	0	-0.147422	0.538222	1	0	-0.0679932	0.676935	1	0
4	protein_coding	ENSG00000156136	DCK	4	0	0	-15	16	8	0.703	0.102	1	0	-1.52301	0.0095319	1	-1	0.0987	0.874636	1	0	0.473707	0.00253012	1	-1	-0.311	0.000192	1	1	-0.152087	0.132474	1	0	-0.345025	0.333534	1	0	-0.873	0.000174	1	1	-1.34331	1.98006e-08	1	1	-1.40928	3.43325e-21	1	1
11	protein_coding	ENSG00000134574	DDB2	4	1	1	18	16	8	-0.0193	0.952	1	0	-1.71472	0.0003993	1	-1	-0.769	0.0158	1	1	-0.0388332	0.838593	1	0	0.00597	0.964	1	0	-0.371479	0.001574	1	1	-0.287679	0.606232	1	0	-0.403	0.0124	1	1	-0.154863	0.515855	1	0	0.0510461	0.663721	1	0
2	protein_coding	ENSG00000079785	DDX1	4	0	0	-2	15	8	-0.149	0.142	1	0	0.990377	0.0024613	1	1	0.426	0.10742	1	0	0.159541	0.210872	1	0	---	---	0	0	-0.16622	0.0281774	1	1	-0.360779	0.296386	1	0	0.034	0.812	1	0	-0.29835	0.0584885	1	0	-0.238173	0.00197383	1	1
2	protein_coding	ENSG00000088205	DDX18	4	0	0	-6	16	8	-0.258	0.0676	1	0	0.538535	0.0250117	1	1	1.5	0.006193	1	-1	0.309615	0.01794	1	-1	-0.0725	0.423	1	0	-0.20904	0.0214677	1	1	-0.0298845	0.952063	1	0	0.326	0.099	1	0	-0.841008	3.26154e-06	1	1	-0.595652	9.76029e-12	1	1
10	protein_coding	ENSG00000107625	DDX50	4	0	0	1	16	8	0.0365	0.859	1	0	0.447441	0.179094	1	0	0.152	0.727561	1	0	0.116317	0.495406	1	0	-0.228	3.49e-05	1	1	-0.234516	0.0532145	1	0	0.364955	0.276296	1	0	-0.337	0.0115	1	1	-0.218716	0.376827	1	0	-0.0644243	0.688943	1	0
1	protein_coding	ENSG00000024526	DEPDC1	4	0	0	-18	15	8	-0.0762	0.761	1	0	-2.15727	0.000557	1	-1	-1.7	0.004873	1	1	-1.73979	3.48151e-20	1	1	---	---	0	0	0.20605	0.101824	1	0	-1.53631	0.00577804	1	-1	-1.71	0.000135	1	1	-2.22142	2.11191e-24	1	1	-2.27097	3.06155e-45	1	1
1	protein_coding	ENSG00000121644	DESI2	4	0	0	-2	16	8	-0.29	0.0142	1	-1	-0.345013	0.11463	1	0	-0.874	0.010278	1	1	-0.194201	0.0881715	1	0	0.597	3.95e-05	1	-1	-0.439841	0.00070838	1	1	-0.178321	0.623812	1	0	-0.411	0.0047	1	1	-0.726879	4.1774e-07	1	1	-0.444998	2.3199e-10	1	1
19	protein_coding	ENSG00000095059	DHPS	4	0	0	-3	16	8	-0.21	0.055	1	0	1.12634	0.0021661	1	1	-0.272	0.273227	1	0	-0.0792199	0.68299	1	0	-0.0253	0.799	1	0	-0.455948	0.0006789	1	1	-0.11986	0.777386	1	0	-0.648	0.000714	1	1	0.149258	0.566322	1	0	-0.0139974	0.946692	1	0
17	protein_coding	ENSG00000167536	DHRS13	4	1	0	-5	14	8	---	---	0	0	-1.05472	0.0016607	1	-1	-1.15	0.007089	1	1	-0.934963	0.0152125	1	1	-0.223	0.000851	1	1	0.0482091	0.589787	1	0	1.00139	0.00329486	1	1	---	---	0	0	-0.234534	0.733649	1	0	-0.491019	0.350185	1	0
17	protein_coding	ENSG00000005100	DHX33	4	0	0	-6	14	8	---	---	0	0	0.427858	0.310494	1	0	0.986	0.025603	1	-1	-0.103975	0.564884	1	0	-0.15	0.277	1	0	-0.132094	0.0847888	1	0	0.271877	0.440635	1	0	---	---	0	0	-0.501098	0.00262047	1	1	-0.589533	1.25598e-08	1	1
19	protein_coding	ENSG00000134815	DHX34	4	0	0	0	16	8	-0.161	0.21	1	0	0.504449	0.0325308	1	1	-0.103	0.717809	1	0	-0.835965	8.37591e-08	1	1	-0.081	0.281	1	0	0.089988	0.192518	1	0	-0.0956932	0.863566	1	0	-0.557	0.00117	1	1	0.256039	0.275652	1	0	0.0631584	0.749698	1	0
1	protein_coding	ENSG00000135829	DHX9	4	0	0	-4	16	8	0.176	0.368	1	0	0.96132	0.0027473	1	1	1.26	0.006078	1	-1	-0.124846	0.320971	1	0	-0.155	0.241	1	0	-0.0588671	0.430247	1	0	-0.09987	0.832802	1	0	0.0902	0.5	1	0	-0.328378	0.0113634	1	1	-0.395692	1.2144e-10	1	1
14	protein_coding	ENSG00000100697	DICER1	4	0	1	-1	15	8	-0.232	0.0723	1	0	0.784003	0.0390072	1	1	0.8	0.019466	1	-1	0.0938602	0.568541	1	0	---	---	0	0	-0.194833	0.0247753	1	1	0.470672	0.116628	1	0	0.767	0.000401	1	-1	-0.571048	0.000513562	1	1	-0.580323	6.65406e-09	1	1
13	protein_coding	ENSG00000083520	DIS3	4	0	0	1	16	8	0.477	0.038	1	1	1.76304	0.0015366	1	1	0.555	0.121628	1	0	0.125841	0.387144	1	0	-0.0653	0.566	1	0	-0.0912565	0.17006	1	0	0.117299	0.766975	1	0	0.0216	0.924	1	0	-0.476803	0.00108945	1	1	-0.383107	4.04644e-06	1	1
2	protein_coding	ENSG00000144355	DLX1	4	0	0	-4	14	8	---	---	0	0	0.942708	0.026444	1	1	0.699	0.08182	1	0	0.47908	0.39987	1	0	-0.158	0.00596	1	1	-0.236105	0.00684981	1	1	0.355364	0.822287	1	0	---	---	0	0	0.847561	0.197835	1	0	0.936412	0.140359	1	0
10	protein_coding	ENSG00000138346	DNA2	4	1	0	-10	15	8	0.609	0.035	1	1	-0.507133	0.025268	1	-1	0.231	0.344111	1	0	-0.960976	7.54194e-05	1	1	---	---	0	0	0.30026	0.00616836	1	-1	0.100313	0.844874	1	0	-0.235	0.107	1	0	-1.15811	4.34803e-07	1	1	-2.05448	8.29574e-33	1	1
7	protein_coding	ENSG00000164818	DNAAF5	4	0	0	-3	16	8	-0.299	0.0591	1	0	1.27416	0.0009581	1	1	0.984	0.030233	1	-1	-0.210158	0.123439	1	0	-0.176	0.047	1	1	-0.0615261	0.530262	1	0	-0.0834315	0.863271	1	0	-0.00211	0.99	1	0	-0.131335	0.557422	1	0	-0.129589	0.339971	1	0
19	protein_coding	ENSG00000132002	DNAJB1	4	1	1	-4	16	8	0.11	0.709	1	0	-0.974601	0.019947	1	-1	-1.85	0.006606	1	1	-1.00914	1.02387e-16	1	1	0.121	0.253	1	0	-0.35884	0.00098434	1	1	0.19013	0.55265	1	0	-0.106	0.395	1	0	-0.355853	0.00913986	1	1	-0.311823	9.47573e-06	1	1
20	protein_coding	ENSG00000125821	DTD1	4	0	0	-5	14	8	---	---	0	0	-0.461155	0.0345526	1	-1	-0.539	0.039617	1	1	-0.696416	1.03826e-05	1	1	-0.074	0.138	1	0	-0.0960093	0.203535	1	0	-0.325644	0.355448	1	0	---	---	0	0	-0.387999	0.0451094	1	1	-0.338044	0.00397754	1	1
19	protein_coding	ENSG00000141994	DUS3L	4	1	1	-4	14	8	---	---	0	0	0.412029	0.138784	1	0	0.39	0.15434	1	0	-0.664577	0.000398333	1	1	-0.0536	0.533	1	0	-0.170148	0.0576997	1	0	0.364194	0.391912	1	0	---	---	0	0	0.170529	0.547558	1	0	-0.114295	0.554064	1	0
1	protein_coding	ENSG00000081721	DUSP12	4	0	0	-1	15	8	-0.71	0.00112	1	-1	1.1728	0.0032907	1	1	0.76	0.033969	1	-1	-0.23043	0.40545	1	0	---	---	0	0	-0.214045	0.0171454	1	1	-0.551657	0.145211	1	0	-0.114	0.342	1	0	-0.540126	0.0173667	1	1	-0.393874	0.00920288	1	1
22	protein_coding	ENSG00000167065	DUSP18	4	0	1	3	14	8	---	---	0	0	0.471217	0.0440783	1	1	0.253	0.300875	1	0	-0.307603	0.278861	1	0	-0.0397	0.689	1	0	-0.285337	0.00302741	1	1	2.52033	7.60238e-17	1	1	---	---	0	0	-0.0660054	0.927059	1	0	-0.274581	0.465119	1	0
18	protein_coding	ENSG00000141627	DYM	4	0	0	-3	14	8	---	---	0	0	-1.08626	0.0016785	1	-1	-1.07	0.006943	1	1	-0.401777	0.0019229	1	1	-0.0854	0.348	1	0	-0.155225	0.0579458	1	0	-0.114974	0.792083	1	0	---	---	0	0	-0.357009	0.0577052	1	0	-0.270521	0.0220703	1	1
13	protein_coding	ENSG00000134874	DZIP1	4	0	0	4	14	7	0.161	0.256	1	0	0.305295	0.15931	1	0	0.146	0.540365	1	0	-0.192255	0.708154	1	0	---	---	0	0	0.0001837	0.998693	1	0	-0.0711445	0.863732	1	0	-0.238	0.0506	1	0	-0.461447	0.00576319	1	1	-0.498098	2.71756e-07	1	1
1	protein_coding	ENSG00000007968	E2F2	4	0	1	-10	16	8	-0.211	0.233	1	0	-0.565603	0.0704994	1	0	0.572	0.071108	1	0	0.298382	0.215541	1	0	-0.0764	0.265	1	0	-0.178675	0.0279319	1	1	1.10944	0.00681188	1	1	0.031	0.846	1	0	-0.762733	0.11333	1	0	-1.35158	0.066372	1	0
16	protein_coding	ENSG00000118894	EEF2KMT	4	0	0	-3	15	8	-0.508	0.0217	1	-1	0.629767	0.017663	1	1	0.989	0.011694	1	-1	-0.126601	0.743005	1	0	---	---	0	0	-0.342052	0.00500335	1	1	-0.712704	0.211366	1	0	-0.0407	0.786	1	0	0.133705	0.785443	1	0	0.0295305	0.94257	1	0
1	protein_coding	ENSG00000142634	EFHD2	4	0	0	-2	15	8	0.743	0.00398	1	1	0.854491	0.0169357	1	1	0.624	0.087855	1	0	-0.525747	1.39498e-05	1	1	---	---	0	0	-0.0709593	0.228477	1	0	-0.184938	0.654885	1	0	-0.742	0.000831	1	1	0.117776	0.566322	1	0	-0.0282522	0.838903	1	0
15	protein_coding	ENSG00000140598	EFL1	4	0	0	-2	16	8	0.32	0.124	1	0	0.32424	0.108035	1	0	-0.106	0.685137	1	0	-0.499247	3.07742e-05	1	1	-0.0818	0.413	1	0	-0.422922	0.00612373	1	1	0.288218	0.363463	1	0	-0.0491	0.727	1	0	-0.177581	0.460506	1	0	-0.086806	0.511937	1	0
19	protein_coding	ENSG00000024422	EHD2	4	1	1	-3	16	8	-0.416	0.0968	1	0	-1.14382	0.0011698	1	-1	-1.02	0.006078	1	1	-1.5188	9.34485e-63	1	1	0.37	0.000247	1	-1	-0.422513	0.00099801	1	1	-0.755899	0.0014164	1	-1	-0.597	0.00124	1	1	-0.000160001	0.999624	1	0	0.053967	0.585149	1	0
11	protein_coding	ENSG00000135373	EHF	4	1	1	2	16	8	1.44	5.21e-05	1	1	-1.02977	0.0028349	1	-1	-1.51	0.00326	1	1	-1.14465	1.01799e-32	1	1	-0.226	0.00569	1	1	-0.146635	0.0602376	1	0	4.3635	0.140563	1	0	1.62	3.02e-05	1	-1	1.8278	0.220423	1	0	1.60044	0.129403	1	0
X	protein_coding	ENSG00000130741	EIF2S3	4	0	0	-1	16	8	-0.275	0.527	1	0	1.90423	0.0011302	1	1	-0.351	0.215698	1	0	-0.447681	2.06857e-05	1	1	-0.178	0.0469	1	1	-0.313186	0.00442292	1	1	-0.192434	0.578864	1	0	-0.504	0.0117	1	1	-0.13574	0.424937	1	0	-0.0251105	0.811422	1	0
10	protein_coding	ENSG00000107581	EIF3A	4	0	0	-7	16	8	-0.233	0.0484	1	-1	1.49649	0.0008542	1	1	1.16	0.027082	1	-1	-0.373181	3.39579e-05	1	1	-0.14	0.362	1	0	-0.256931	0.00513072	1	1	-0.151044	0.684394	1	0	0.232	0.0725	1	0	-0.34772	0.0268182	1	1	-0.15322	0.0198613	1	1
22	protein_coding	ENSG00000100353	EIF3D	4	1	1	0	16	8	-0.746	0.0672	1	0	0.500348	0.0249064	1	1	0.0958	0.707345	1	0	-0.278999	0.00892763	1	1	-0.278	0.00938	1	1	-0.316401	0.0015143	1	1	-0.0740349	0.894431	1	0	0.171	0.167	1	0	0.440975	0.00260401	1	-1	0.276664	5.96861e-05	1	-1
17	protein_coding	ENSG00000161960	EIF4A1	4	0	1	0	16	8	-0.288	0.139	1	0	0.967175	0.0036737	1	1	0.416	0.139047	1	0	-0.70938	0.0867211	1	0	-0.468	0.00277	1	1	0.301664	0.00598216	1	-1	0.635688	0.314618	1	0	-0.348	0.0129	1	1	0.849946	0.0804946	1	0	0.0774836	0.870942	1	0
X	protein_coding	ENSG00000126767	ELK1	4	0	0	-1	16	8	-0.12	0.281	1	0	-0.27522	0.209997	1	0	0.202	0.508941	1	0	-0.530219	1.49375e-05	1	1	0.063	0.465	1	0	-0.211628	0.0165447	1	1	-0.302554	0.375705	1	0	-0.482	0.0144	1	1	0.058727	0.865912	1	0	0.0994005	0.623958	1	0
12	protein_coding	ENSG00000111145	ELK3	4	1	1	2	16	8	0.239	0.0632	1	0	-0.751656	0.0104087	1	-1	-0.787	0.01784	1	1	-1.38602	1.41344e-41	1	1	0.0144	0.857	1	0	0.290024	0.00226343	1	-1	0.0593195	0.880874	1	0	-0.376	0.0727	1	0	-0.492668	0.00244386	1	1	-0.294384	0.00107229	1	1
1	protein_coding	ENSG00000011007	ELOA	4	0	0	0	16	8	-0.449	0.0566	1	0	1.63902	0.0006013	1	1	0.246	0.310721	1	0	-0.200664	0.265349	1	0	-0.102	0.0606	1	0	-0.357084	0.00097001	1	1	0.600113	0.0236343	1	1	0.0907	0.461	1	0	-0.268744	0.122331	1	0	-0.252132	0.0162868	1	1
6	protein_coding	ENSG00000118402	ELOVL4	4	0	0	5	15	7	-0.226	0.658	1	0	-0.131428	0.514388	1	0	-3.08	0.003116	1	1	-3.92859	2.28188e-224	1	1	0.0293	0.816	1	0	0.316624	0.0349528	1	-1	0.455422	0.411382	1	0	0.281	0.0378	1	-1	-0.842594	0.00875218	1	1	-0.596153	0.00840011	1	1
9	protein_coding	ENSG00000070061	ELP1	4	0	0	-4	16	8	-0.394	0.0234	1	-1	-0.195168	0.306447	1	0	0.323	0.167234	1	0	-0.716376	8.04069e-11	1	1	-0.0339	0.797	1	0	-0.0609623	0.350161	1	0	0.10721	0.790359	1	0	0.0394	0.805	1	0	-0.507284	0.00187621	1	1	-0.460639	1.99986e-06	1	1
5	protein_coding	ENSG00000170571	EMB	4	0	0	-1	13	8	---	---	0	0	-0.0369672	0.872185	1	0	-0.0722	0.811626	1	0	-0.540822	4.78301e-06	1	1	---	---	0	0	0.066012	0.47106	1	0	-1.54209	1.43255e-06	1	-1	---	---	0	0	-0.846162	1.07788e-08	1	1	-0.774396	9.32394e-20	1	1
14	protein_coding	ENSG00000066629	EML1	4	1	1	0	15	7	-0.15	0.437	1	0	0.68185	0.009164	1	1	-1.69	0.005151	1	1	-0.104332	0.672282	1	0	0.114	0.493	1	0	0.103469	0.398747	1	0	-0.179471	0.710043	1	0	-0.404	0.00571	1	1	0.280333	0.498834	1	0	-0.134579	0.688591	1	0
2	protein_coding	ENSG00000143924	EML4	4	0	1	-6	15	8	-0.0211	0.882	1	0	1.27029	0.0022793	1	1	0.803	0.027446	1	-1	0.0010946	0.996288	1	0	---	---	0	0	-0.145769	0.0382052	1	1	0.0720645	0.889782	1	0	-0.424	0.00452	1	1	-0.433851	0.0346681	1	1	-0.433176	0.000140228	1	1
16	protein_coding	ENSG00000213853	EMP2	4	0	1	-8	16	8	0.827	0.000919	1	1	0.510748	0.0851113	1	0	-0.438	0.449977	1	0	0.115745	0.391268	1	0	0.189	0.392	1	0	-0.0217829	0.763572	1	0	-0.527416	0.081131	1	0	-0.417	0.00475	1	1	-1.1592	1.13588e-13	1	1	-1.47207	1.91219e-45	1	1
10	protein_coding	ENSG00000198018	ENTPD7	4	1	1	1	16	8	0.332	0.0187	1	1	-0.555186	0.156144	1	0	-0.281	0.366661	1	0	-0.638175	0.000228604	1	1	-0.157	0.00189	1	1	0.398955	0.00123149	1	-1	0.468023	0.102102	1	0	-0.292	0.0289	1	1	-0.408305	0.392576	1	0	-0.103743	0.769326	1	0
3	protein_coding	ENSG00000163508	EOMES	4	0	0	3	12	6	---	---	0	0	-0.261245	0.29233	1	0	0.00739	0.98399	1	0	-2.03815	0.127847	1	0	-0.0273	0.651	1	0	-0.0204363	0.867489	1	0	6.00132	0.0200263	1	1	---	---	0	0	-1.38112	0.0144748	1	1	-1.13655	0.00194852	1	1
19	protein_coding	ENSG00000187266	EPOR	4	0	0	0	16	8	0.385	0.00868	1	1	-1.01117	0.009357	1	-1	-0.59	0.029951	1	1	-0.440976	0.32929	1	0	-0.0311	0.731	1	0	0.0834299	0.528421	1	0	1.28289	0.00726137	1	1	-0.41	0.0153	1	1	-1.33155	0.0956285	1	0	-2.3839	0.000503654	1	1
17	protein_coding	ENSG00000132591	ERAL1	4	0	0	-1	16	8	-0.193	0.266	1	0	0.150846	0.445749	1	0	0.0326	0.921434	1	0	0.139844	0.435127	1	0	0.0114	0.867	1	0	-0.31502	0.00284079	1	1	0.123083	0.753659	1	0	-0.472	0.00279	1	1	-0.161173	0.557311	1	0	-0.235943	0.11651	1	0
19	protein_coding	ENSG00000012061	ERCC1	4	1	1	4	16	8	-0.12	0.302	1	0	0.89235	0.0037642	1	1	-0.445	0.219167	1	0	-1.01405	3.61552e-23	1	1	0.0393	0.563	1	0	-0.287693	0.0119828	1	1	-0.0976993	0.828073	1	0	-0.324	0.0166	1	1	0.13486	0.549715	1	0	0.226202	0.0156845	1	-1
16	protein_coding	ENSG00000196678	ERI2	4	0	0	0	16	8	0.216	0.363	1	0	0.345222	0.088016	1	0	0.589	0.084088	1	0	0.725055	0.00012265	1	-1	-0.0231	0.751	1	0	-0.184683	0.0351931	1	1	0.600878	0.0439447	1	1	-0.147	0.252	1	0	-0.914833	0.00160501	1	1	-0.564582	5.74667e-05	1	1
5	protein_coding	ENSG00000120705	ETF1	4	0	1	-2	16	8	-0.516	0.0054	1	-1	0.819446	0.0080035	1	1	0.373	0.170677	1	0	-0.846611	4.78814e-20	1	1	0.0577	0.666	1	0	-0.189815	0.0331942	1	1	-0.00027166	0.999392	1	0	-0.154	0.194	1	0	-0.417953	0.0016252	1	1	-0.362792	7.47564e-09	1	1
3	protein_coding	ENSG00000244405	ETV5	4	1	0	-4	16	8	-0.421	0.0131	1	-1	0.816701	0.0061511	1	1	0.387	0.31096	1	0	-1.22849	4.04799e-19	1	1	-0.0849	0.309	1	0	0.300779	0.00451808	1	-1	-0.158397	0.71468	1	0	-0.742	0.000423	1	1	-0.574977	0.00390319	1	1	-0.60015	4.04634e-06	1	1
9	protein_coding	ENSG00000107371	EXOSC3	4	0	0	-5	14	8	---	---	0	0	1.76654	0.0013761	1	1	0.92	0.008063	1	-1	0.224592	0.322976	1	0	-0.0554	0.487	1	0	0.0493621	0.523213	1	0	-0.180932	0.6697	1	0	---	---	0	0	-0.785079	0.00378292	1	1	-0.680694	7.29769e-05	1	1
8	protein_coding	ENSG00000178896	EXOSC4	4	1	0	-1	16	8	0.21	0.241	1	0	1.48643	0.0005654	1	1	1.09	0.006311	1	-1	0.0077385	0.980974	1	0	-0.206	0.00851	1	1	-0.279673	0.0087628	1	1	-0.327925	0.44024	1	0	0.026	0.862	1	0	0.265918	0.363117	1	0	0.0015413	0.994706	1	0
11	protein_coding	ENSG00000110723	EXPH5	4	0	0	-9	16	8	-0.532	0.0316	1	-1	-1.79098	0.0003103	1	-1	-2.59	0.001527	1	1	0.0326198	0.839282	1	0	0.0921	0.739	1	0	0.126222	0.0900766	1	0	2.05917	3.17635e-08	1	1	-0.419	0.0331	1	1	-0.985473	0.000220291	1	1	-0.404855	0.0789473	1	0
8	protein_coding	ENSG00000012232	EXTL3	4	1	1	3	16	8	0.34	0.0707	1	0	1.2015	0.0009613	1	1	0.477	0.062368	1	0	-0.165181	0.154342	1	0	0.019	0.796	1	0	0.516884	0.00084081	1	-1	0.316106	0.246403	1	0	-0.229	0.078	1	0	-0.296281	0.0734162	1	0	-0.267262	0.00476957	1	1
11	protein_coding	ENSG00000221968	FADS3	4	1	0	12	16	8	0.283	0.0339	1	1	0.818246	0.0041511	1	1	0.732	0.018182	1	-1	1.90257	2.62196e-11	1	-1	-0.0166	0.804	1	0	0.381667	0.00102697	1	-1	1.67465	3.47691e-12	1	1	-0.249	0.0446	1	1	0.707444	0.000305968	1	-1	0.555232	1.04202e-06	1	-1
15	protein_coding	ENSG00000103876	FAH	4	1	0	0	16	8	-1.03	0.00876	1	-1	0.433433	0.0734948	1	0	0.617	0.056632	1	0	0.556167	0.0135139	1	-1	-0.221	0.0015	1	1	-0.175132	0.038975	1	1	0.619344	0.05736	1	0	-0.243	0.06	1	0	0.235443	0.380311	1	0	0.0472921	0.831822	1	0
17	protein_coding	ENSG00000167695	FAM57A	4	1	1	-10	16	8	-0.26	0.165	1	0	-1.32433	0.0007528	1	-1	-1.47	0.005495	1	1	-1.11206	3.30302e-21	1	1	-0.114	0.00599	1	1	0.343871	0.0019333	1	-1	-0.267167	0.415519	1	0	-0.576	0.000933	1	1	-0.0454911	0.87278	1	0	-0.112171	0.489726	1	0
1	protein_coding	ENSG00000215784	FAM72D	4	0	0	-9	10	8	---	---	0	0	-2.08685	0.0002283	1	-1	-1.16	0.006618	1	1	-2.75425	0.000117239	1	1	---	---	0	0	---	---	0	0	-1.44255	0.166312	1	0	---	---	0	0	-1.97154	1.04803e-05	1	1	-1.75752	3.59821e-07	1	1
8	protein_coding	ENSG00000176853	FAM91A1	4	0	1	2	14	8	---	---	0	0	-0.393426	0.140839	1	0	0.364	0.124633	1	0	-0.445583	0.000135298	1	1	-0.00628	0.954	1	0	-0.247404	0.0141402	1	1	0.384085	0.217226	1	0	---	---	0	0	-0.628577	1.79331e-05	1	1	-0.516715	2.14624e-11	1	1
15	protein_coding	ENSG00000171262	FAM98B	4	0	0	-2	14	8	---	---	0	0	0.833549	0.0103398	1	1	1.6	0.003963	1	-1	0.21152	0.341974	1	0	-0.0425	0.422	1	0	-0.281353	0.00589121	1	1	-0.207918	0.578426	1	0	---	---	0	0	-0.505279	0.0343198	1	1	-0.295699	0.00439542	1	1
2	protein_coding	ENSG00000115392	FANCL	4	0	0	-7	16	8	0.215	0.326	1	0	0.26499	0.417644	1	0	0.86	0.050269	1	0	-0.193717	0.537732	1	0	0.0872	0.393	1	0	-0.142987	0.158644	1	0	0.546919	0.161014	1	0	-0.634	0.00396	1	1	-0.204255	0.59695	1	0	0.004138	0.989385	1	0
2	protein_coding	ENSG00000006607	FARP2	4	1	0	0	15	8	0.105	0.52	1	0	1.53263	0.0008857	1	1	-0.253	0.283507	1	0	-0.464165	4.56022e-05	1	1	---	---	0	0	-0.0206618	0.788883	1	0	-0.0548611	0.900897	1	0	-0.112	0.389	1	0	-0.501852	0.00416373	1	1	-0.557774	1.13715e-06	1	1
7	protein_coding	ENSG00000132436	FIGNL1	4	0	0	-15	14	8	---	---	0	0	-0.488313	0.133093	1	0	-0.566	0.053939	1	0	-0.261893	0.204264	1	0	-0.175	0.251	1	0	0.0152144	0.814991	1	0	-0.0121272	0.980492	1	0	---	---	0	0	-1.15004	3.11447e-08	1	1	-1.65311	7.95309e-32	1	1
2	protein_coding	ENSG00000119782	FKBP1B	4	0	0	1	15	7	0.454	0.00393	1	1	-1.36761	0.000691	1	-1	-1.55	0.002818	1	1	-1.93791	2.26955e-12	1	1	0.0605	0.424	1	0	-0.201514	0.0165332	1	1	0.633757	0.245144	1	0	0.25	0.155	1	0	-0.879194	0.337282	1	0	-1.53272	0.0161938	1	1
1	protein_coding	ENSG00000143631	FLG	4	0	0	4	12	5	0.0021	0.989	1	0	2.33138	0.0008327	1	1	-3.68	0.003065	1	1	-3.07157	2.7523e-128	1	1	---	---	0	0	0.206722	0.0904949	1	0	5.32671	3.88434e-43	1	1	-0.0604	0.739	1	0	---	---	0	0	---	---	0	0
X	protein_coding	ENSG00000196924	FLNA	4	1	0	4	16	8	-0.273	0.26	1	0	1.85885	0.0008295	1	1	0.48	0.152378	1	0	-1.29843	3.6707e-55	1	1	-0.206	0.375	1	0	0.448804	0.0011741	1	-1	-0.184954	0.636724	1	0	-0.819	0.00028	1	1	0.11148	0.532471	1	0	0.0680267	0.370366	1	0
14	protein_coding	ENSG00000185070	FLRT2	4	1	1	9	14	6	-0.605	0.0016	1	-1	0.561222	0.0293728	1	1	-0.926	0.031423	1	1	-1.6903	6.01096e-54	1	1	-0.204	0.0123	1	1	0.855758	0.00032664	1	-1	0.699729	0.00809823	1	1	-1.26	6.81e-05	1	1	0.131424	0.489097	1	0	0.368039	1.68985e-06	1	-1
1	protein_coding	ENSG00000162769	FLVCR1	4	0	0	-3	14	8	---	---	0	0	-1.14441	0.0014434	1	-1	0.096	0.708729	1	0	-1.12274	6.06521e-06	1	1	-0.2	0.0133	1	1	0.388298	0.00151033	1	-1	1.32195	0.000425961	1	1	---	---	0	0	0.0272686	0.931914	1	0	-0.00377875	0.984166	1	0
11	protein_coding	ENSG00000110203	FOLR3	4	1	1	1	14	6	1.18	0.000616	1	1	-1.01396	0.0059768	1	-1	-2.26	0.002547	1	1	-6.673	4.56383e-24	1	1	0.348	0.061	1	0	-0.0271939	0.776266	1	0	2.62005	7.42835e-07	1	1	-0.0362	0.815	1	0	-1.91549	0.284035	1	0	-3.00865	0.00252822	1	1
14	protein_coding	ENSG00000139926	FRMD6	4	1	1	0	14	8	---	---	0	0	1.28425	0.0009269	1	1	-0.734	0.025379	1	1	-0.684704	1.38634e-12	1	1	0.418	0.0105	1	-1	-0.117475	0.0748313	1	0	-0.627345	0.0090859	1	-1	---	---	0	0	-0.305227	0.0917786	1	0	-0.114738	0.280206	1	0
1	protein_coding	ENSG00000123689	G0S2	4	0	1	1	12	4	0.0712	0.626	1	0	1.16708	0.0345469	1	1	-1.72	0.021549	1	1	-4.78831	3.27874e-43	1	1	0.0571	0.675	1	0	0.125979	0.2915	1	0	-1.25518	0.479804	1	0	-0.0812	0.521	1	0	---	---	0	0	---	---	0	0
21	protein_coding	ENSG00000154727	GABPA	4	0	0	0	14	8	---	---	0	0	-0.42414	0.0723663	1	0	0.0448	0.898693	1	0	-0.386081	0.0353585	1	1	0.0637	0.591	1	0	-0.463016	0.00174498	1	1	0.176732	0.653758	1	0	---	---	0	0	-0.455945	0.0858376	1	0	-0.311735	0.072869	1	0
11	protein_coding	ENSG00000069482	GAL	4	0	0	-4	14	6	0.0173	0.941	1	0	-1.1455	0.0012668	1	-1	-0.254	0.494724	1	0	-3.46657	7.72214e-14	1	1	0.0227	0.748	1	0	0.0047955	0.97514	1	0	-1.36262	0.140081	1	0	0.0716	0.67	1	0	---	---	0	0	---	---	0	0
2	protein_coding	ENSG00000158089	GALNT14	4	0	0	-6	14	7	-0.0137	0.924	1	0	-0.19718	0.300276	1	0	-0.255	0.282332	1	0	-2.31978	3.06322e-49	1	1	---	---	0	0	-0.0177316	0.897597	1	0	1.5732	0.000339159	1	1	-0.743	0.00344	1	1	-0.679559	0.18326	1	0	-0.550222	0.0763812	1	0
7	protein_coding	ENSG00000106105	GARS	4	0	0	-6	16	8	-0.541	0.0452	1	-1	0.466435	0.187743	1	0	-0.294	0.592646	1	0	-1.30554	1.24171e-42	1	1	-0.375	0.0165	1	1	0.0178511	0.799854	1	0	-0.38444	0.300263	1	0	-1.01	5.92e-05	1	1	-0.0264353	0.903506	1	0	0.0208531	0.843382	1	0
12	protein_coding	ENSG00000089154	GCN1	4	0	0	-2	15	8	0.0489	0.818	1	0	2.61289	0.0004547	1	1	1.32	0.003524	1	-1	-0.210281	0.0519152	1	0	---	---	0	0	0.001855	0.984496	1	0	0.803385	0.00062873	1	1	-0.312	0.0178	1	1	0.168341	0.376365	1	0	0.0452745	0.693483	1	0
8	protein_coding	ENSG00000104381	GDAP1	4	0	0	0	16	8	0.0421	0.767	1	0	0.855227	0.0034974	1	1	1.67	0.004639	1	-1	-0.147619	0.659889	1	0	0.0156	0.929	1	0	-0.14085	0.0602468	1	0	0.59316	0.209946	1	0	-0.0711	0.621	1	0	-0.695896	0.0266315	1	1	-0.432097	0.0210931	1	1
13	protein_coding	ENSG00000165474	GJB2	4	0	0	-5	12	6	---	---	0	0	-0.0841169	0.679118	1	0	-0.923	0.009202	1	1	-1.15312	4.79961e-32	1	1	-0.0632	0.481	1	0	0.802435	0.00013486	1	-1	---	---	0	0	---	---	0	0	-0.5854	0.011457	1	1	-0.71984	1.26546e-05	1	1
X	protein_coding	ENSG00000102393	GLA	4	0	0	1	16	8	0.554	0.018	1	1	-0.163335	0.49714	1	0	-0.0705	0.834032	1	0	-1.50259	7.4556e-25	1	1	-0.277	0.000152	1	1	0.466463	0.00061518	1	-1	-0.525038	0.0912773	1	0	-0.205	0.091	1	0	-0.64378	0.0029094	1	1	-0.69051	6.66218e-08	1	1
9	protein_coding	ENSG00000119392	GLE1	4	0	0	0	16	8	-0.283	0.385	1	0	0.613481	0.0170123	1	1	0.156	0.513046	1	0	0.234461	0.0746256	1	0	-0.154	0.1	1	0	-0.378202	0.00122686	1	1	-0.116454	0.788735	1	0	-0.575	0.0053	1	1	-0.0744113	0.763885	1	0	-0.103117	0.428523	1	0
6	protein_coding	ENSG00000124767	GLO1	4	0	0	-2	16	8	-0.142	0.169	1	0	0.81914	0.00751	1	1	0.156	0.572862	1	0	-0.36209	0.00019923	1	1	0.0481	0.693	1	0	-0.0764959	0.342111	1	0	-0.584052	0.049002	1	-1	-0.0822	0.515	1	0	-0.534025	0.000741265	1	1	-0.409785	3.67599e-08	1	1
10	protein_coding	ENSG00000108010	GLRX3	4	1	1	0	15	8	-0.411	0.0104	1	-1	2.54515	0.0005518	1	1	-0.466	0.092104	1	0	-0.563112	3.49237e-06	1	1	---	---	0	0	-0.154132	0.0777075	1	0	-0.995861	0.000102127	1	-1	-0.399	0.00593	1	1	-0.126486	0.522285	1	0	-0.149343	0.131204	1	0
12	protein_coding	ENSG00000135423	GLS2	4	1	0	15	15	7	-0.107	0.413	1	0	0.379271	0.117001	1	0	0.147	0.646323	1	0	0.0817775	0.967719	1	0	0.00642	0.949	1	0	0.0719425	0.446501	1	0	2.82401	0.116348	1	0	-0.0709	0.607	1	0	-0.359498	0.646499	1	0	-0.202035	0.533093	1	0
12	protein_coding	ENSG00000139433	GLTP	4	0	1	13	13	8	---	---	0	0	0.605884	0.0139065	1	1	-2.12	0.002386	1	1	-3.28325	2.0277e-297	1	1	---	---	0	0	-0.865965	0.00035359	1	1	-0.302445	0.336057	1	0	---	---	0	0	-0.191401	0.432848	1	0	-0.0138854	0.94053	1	0
10	protein_coding	ENSG00000148672	GLUD1	4	0	0	-3	16	8	-0.17	0.234	1	0	-1.18606	0.0015681	1	-1	-0.778	0.018654	1	1	0.0341923	0.838593	1	0	0.125	0.114	1	0	-0.537216	0.00038207	1	1	-0.344509	0.216776	1	0	0.499	0.0021	1	-1	-0.37327	0.00720083	1	1	-0.437096	2.92105e-09	1	1
3	protein_coding	ENSG00000163655	GMPS	4	0	0	-11	14	8	---	---	0	0	0.299763	0.124185	1	0	1.9	0.002023	1	-1	0.019414	0.911109	1	0	-0.296	0.0488	1	1	-0.0078263	0.922749	1	0	-0.203326	0.556385	1	0	---	---	0	0	-0.48543	0.00121307	1	1	-0.538022	2.29796e-12	1	1
3	protein_coding	ENSG00000114353	GNAI2	4	1	1	-2	16	8	0.401	0.0406	1	1	0.834112	0.0035899	1	1	-0.276	0.215676	1	0	0.311166	0.000923054	1	-1	0.0508	0.312	1	0	-0.136223	0.0584289	1	0	-0.143749	0.679412	1	0	-0.494	0.00278	1	1	-0.17889	0.295404	1	0	-0.325638	1.09775e-05	1	1
1	protein_coding	ENSG00000134697	GNL2	4	0	0	0	16	8	-0.526	0.103	1	0	0.468563	0.0419872	1	1	0.358	0.174386	1	0	-0.213721	0.0946258	1	0	-0.416	0.0171	1	1	0.046032	0.525589	1	0	-0.161958	0.711868	1	0	0.227	0.153	1	0	-0.270868	0.0773858	1	0	-0.236773	0.00502935	1	1
5	protein_coding	ENSG00000113552	GNPDA1	4	0	0	0	16	8	-0.463	0.124	1	0	-0.885349	0.003289	1	-1	0.285	0.213553	1	0	-0.535112	1.56267e-05	1	1	0.0153	0.9	1	0	-0.559579	0.00047429	1	1	0.0224806	0.991881	1	0	0.0366	0.808	1	0	0.0867922	0.704973	1	0	0.199241	0.0635007	1	0
14	protein_coding	ENSG00000100522	GNPNAT1	4	0	0	-6	13	8	---	---	0	0	0.495838	0.0267245	1	1	0.961	0.007278	1	-1	-0.124587	0.554092	1	0	---	---	0	0	-0.395257	0.00074346	1	1	-0.866001	0.000212836	1	-1	---	---	0	0	-0.286804	0.0624225	1	0	-0.195247	0.0251044	1	1
1	protein_coding	ENSG00000160818	GPATCH4	4	1	1	-6	14	8	---	---	0	0	2.29496	0.0002065	1	1	2.18	0.001557	1	-1	-0.035269	0.907942	1	0	0.0062	0.932	1	0	-0.128926	0.126845	1	0	-0.052629	0.927918	1	0	---	---	0	0	-0.271549	0.111858	1	0	-0.144496	0.113993	1	0
12	protein_coding	ENSG00000111231	GPN3	4	0	0	-4	16	8	0.0472	0.809	1	0	-0.404342	0.067684	1	0	0.384	0.127763	1	0	0.0607913	0.838562	1	0	-0.0345	0.579	1	0	-0.328241	0.00145652	1	1	-0.307569	0.47211	1	0	0.0418	0.764	1	0	-0.809391	0.00193256	1	1	-0.72482	2.49345e-05	1	1
11	protein_coding	ENSG00000173020	GRK2	4	1	0	-1	16	8	0.0988	0.33	1	0	-0.200019	0.356283	1	0	-0.689	0.048267	1	1	-0.582755	8.3508e-08	1	1	0.224	0.361	1	0	-0.403595	0.00136269	1	1	-0.10836	0.786335	1	0	-0.644	0.00132	1	1	-0.0403404	0.890346	1	0	-0.0566019	0.739929	1	0
13	protein_coding	ENSG00000139835	GRTP1	4	1	1	4	16	8	0.011	0.953	1	0	-1.89141	0.0003018	1	-1	-1.13	0.004838	1	1	0.32635	0.158199	1	0	-0.0438	0.696	1	0	-0.0864541	0.214452	1	0	1.04025	0.0343867	1	1	-0.00192	0.992	1	0	0.724284	0.565628	1	0	1.32128	0.0550169	1	0
17	protein_coding	ENSG00000167914	GSDMA	4	0	1	1	8	4	---	---	0	0	---	---	0	0	---	---	0	0	-5.46776	0	1	1	0.0286	0.729	1	0	-0.0159367	0.90559	1	0	---	---	0	0	---	---	0	0	-5.60662	0.0200527	1	1	-3.20173	0.00187298	1	1
3	protein_coding	ENSG00000153767	GTF2E1	4	0	0	-2	16	8	0.0573	0.731	1	0	0.789075	0.0175153	1	1	0.508	0.115658	1	0	-0.242655	0.268037	1	0	-0.11	0.196	1	0	-0.195168	0.0180655	1	1	0.00699669	0.990329	1	0	0.188	0.12	1	0	-0.253318	0.426028	1	0	-0.231492	0.295733	1	0
19	protein_coding	ENSG00000125651	GTF2F1	4	0	0	1	16	8	-0.202	0.653	1	0	0.475396	0.0412653	1	1	-0.574	0.418061	1	0	0.0885249	0.544008	1	0	-0.0833	0.226	1	0	-0.358701	0.0012691	1	1	-0.0845999	0.847645	1	0	-0.145	0.306	1	0	-0.153415	0.416281	1	0	-0.0780588	0.512327	1	0
9	protein_coding	ENSG00000125484	GTF3C4	4	0	1	-1	16	8	-0.325	0.133	1	0	0.396554	0.0843067	1	0	0.831	0.05976	1	0	-0.0692314	0.740962	1	0	-0.316	0.000275	1	1	-0.127868	0.0897031	1	0	0.552464	0.0317761	1	1	0.352	0.00981	1	-1	-0.562028	0.00106256	1	1	-0.493339	1.61672e-05	1	1
10	protein_coding	ENSG00000107937	GTPBP4	4	0	0	-4	16	8	-0.243	0.0743	1	0	1.94766	0.001411	1	1	1.22	0.007081	1	-1	-1.26546	4.20377e-34	1	1	-0.323	0.0182	1	1	0.0844918	0.143241	1	0	-0.00676524	0.987327	1	0	0.435	0.0188	1	-1	-0.400521	0.025816	1	1	-0.176273	0.0551906	1	0
17	protein_coding	ENSG00000173805	HAP1	4	0	1	1	13	6	0.118	0.367	1	0	0.444331	0.0382488	1	1	-0.127	0.577462	1	0	-1.61165	4.99698e-11	1	1	---	---	0	0	-0.234981	0.0150763	1	1	2.42497	3.27044e-06	1	1	-0.151	0.465	1	0	---	---	0	0	---	---	0	0
14	protein_coding	ENSG00000092036	HAUS4	4	0	1	-10	12	8	---	---	0	0	---	---	0	0	---	---	0	0	-0.139161	0.558665	1	0	-0.13	0.034	1	1	-0.64048	0.00025909	1	1	-0.425088	0.310281	1	0	---	---	0	0	-0.490337	0.125858	1	0	-0.458826	0.0333967	1	1
19	protein_coding	ENSG00000249115	HAUS5	4	1	1	-7	15	8	0.104	0.302	1	0	-0.452219	0.0826392	1	0	0.156	0.61645	1	0	-0.609353	0.00154398	1	1	---	---	0	0	0.187466	0.0997253	1	0	0.391147	0.356164	1	0	-0.199	0.0973	1	0	-0.255901	0.452509	1	0	-0.511316	0.00974961	1	1
1	protein_coding	ENSG00000119285	HEATR1	4	0	0	-7	16	8	-0.948	0.000877	1	-1	1.42795	0.0026622	1	1	0.695	0.021835	1	-1	-0.177549	0.194032	1	0	-0.101	0.382	1	0	-0.0483527	0.448767	1	0	0.350542	0.293582	1	0	0.0587	0.681	1	0	-0.357375	0.01694	1	1	-0.255252	0.000307177	1	1
1	protein_coding	ENSG00000069812	HES2	4	1	0	8	15	7	0.41	0.0116	1	1	-0.473667	0.0304279	1	-1	-0.926	0.007335	1	1	-0.361398	0.00203707	1	1	-0.0394	0.658	1	0	-0.204316	0.10456	1	0	3.02617	1.68272e-08	1	1	-0.447	0.00545	1	1	-0.116477	0.765001	1	0	0.0136825	0.94142	1	0
6	protein_coding	ENSG00000187837	HIST1H1C	4	0	0	-3	16	8	1.15	7.33e-05	1	1	0.0226912	0.940491	1	0	-0.886	0.025385	1	1	-1.6827	1.14456e-36	1	1	0.646	3.7e-05	1	-1	-0.325044	0.00301393	1	1	1.25657	8.29e-06	1	1	1.85	7.25e-06	1	-1	-0.179382	0.827311	1	0	-0.586798	0.626374	1	0
6	protein_coding	ENSG00000124575	HIST1H1D	4	0	0	-5	14	6	0.00646	0.975	1	0	-0.24753	0.180337	1	0	-0.0288	0.917828	1	0	-1.92523	3.47447e-44	1	1	0.123	0.0471	1	-1	-0.0054971	0.957617	1	0	5.77622	0.0350862	1	1	0.18	0.135	1	0	-1.44102	0.145328	1	0	-2.87902	4.07576e-05	1	1
[truncated: 17,667 more rows]
[truncated: 32 more columns]
