# Supplementary material for: Dissecting the DNA binding landscape and gene regulatory network of p63 and p53
Source: eLife. 2020 Dec 2;9:e63266. doi: 10.7554/eLife.63266 (PMC7735755; doi:10.7554/eLife.63266)
Supplement: Supplementary file 3. — Binding sites are listed with their ChIP-seq dataset support and highest scoring p63 response elements (p63REs) or p53REs. Genes associated with p63-binding sites through proximal TSS binding or enhancers are listed. [file elife-63266-supp3.xlsx]

## Sheet: p63peaks+REs
p63peak_Chromosome	p63peak_Start	p63peak_End	Number of supporting p63 ChIP-seq datasets	p63RE_Chromosome	p63RE_Start	p63RE_End	Strand	p63RE_class	HOMER_motif.score	p63RE_sequence
chr1	3716912	3717723	20	chr1	3717092	3717116	+	primary.unique-p63RE	8.18559	TTTGCAAGATGCTACACGTCCCAG
chr1	5652139	5652703	20	chr1	5652400	5652424	+	primary.unique-p63RE	7.78423	CCGGCAAGAGCTGACACGTTGTGG
chr1	23167389	23167912	20	chr1	23167597	23167616	+	primary.p53+p63RE	9.43279	AAACAAGCCACAACAAGCT
chr1	31574872	31575935	20	chr1	31575754	31575773	-	secondary.unique-p63RE	9.10351	AGGCCAGCCTGGGCAAAGA
chr1	38026970	38027717	20	chr1	38027284	38027308	-	primary.unique-p63RE	9.24323	CAGGGCCTGTTGGGACTTGAAACA
chr1	38117328	38118197	20	chr1	38117813	38117832	+	primary.p53+p63RE	12.2121	TGGCGTGCCTGAGCATGTC
chr1	40886634	40887465	20	chr1	40886808	40886827	+	primary.p53+p63RE	11.646	GTGCATGCCCGTGCATGCA
chr1	42940918	42941444	20	chr1	42941183	42941207	+	primary.unique-p63RE	8.6429	AATGCAAGTCTGATCACGTCTGCC
chr1	43581985	43582652	20	chr1	43582374	43582393	+	primary.p53+p63RE	10.7317	TAGCAGGCCCAGGCATGCT
chr1	51636940	51637413	20	chr1	51637211	51637235	-	primary.unique-p63RE	8.51155	CCAGGCATGTTGGCTCACGCCTGT
chr1	59764885	59765506	20	chr1	59765194	59765213	+	primary.p53+p63RE	9.47701	GGGCAGGCCTGGACCTGCT
chr1	64262971	64263879	20	chr1	64263404	64263423	+	primary.p53+p63RE	9.70685	GAGCGTGCCTGGACTGGCC
chr1	64343479	64344168	20	chr1	64343758	64343782	-	primary.unique-p63RE	8.72937	CAGTGCTTGCTTCAGCTTGTGCCT
chr1	93592997	93593374	20	chr1	93593201	93593220	-	primary.p53+p63RE	10.4712	GCAAGACCAGGCATGCTGA
chr1	99580153	99580984	20	chr1	99580574	99580593	-	primary.p53+p63RE	10.5154	GCAAGTGCTGGCATGTCTC
chr1	109892777	109893423	20	chr1	109893184	109893208	-	primary.unique-p63RE	8.70555	TACTCCAAGTCCAGGCTTGCTCCT
chr1	110259641	110260323	20	chr1	110260007	110260026	-	primary.p53+p63RE	10.1869	GCAGGCCTGGGCATGCATC
chr1	118209613	118210062	20	chr1	118209800	118209824	+	primary.unique-p63RE	9.95331	AATACATGCTGGAACTTGAACAGT
chr1	161074451	161075357	20	chr1	161075202	161075221	-	primary.p53+p63RE	9.81024	ACATGTGAGAACATGCCCA
chr1	200226778	200227337	20	chr1	200227117	200227136	+	primary.p53+p63RE	11.6591	AGGCATGCTGCAACATGCT
chr1	200669441	200670347	20	chr1	200669846	200669870	+	primary.unique-p63RE	8.47516	CCGACAAGCCCTGACCCGCTCGTC
chr1	203750768	203751485	20	chr1	203751297	203751316	-	primary.p53+p63RE	9.37952	ACATGTGCCGGCAGGCTTC
chr1	205591795	205592393	20	chr1	205592211	205592230	-	primary.p53+p63RE	10.633	GCAAGCCTGGGCCTGTTTC
chr1	206001839	206002563	20	chr1	206002240	206002264	+	primary.unique-p63RE	9.50472	CTAGCAGGTCTAGACCTGCTCCCT
chr1	209364533	209365541	20	chr1	209364924	209364948	-	primary.unique-p63RE	8.69604	GGGGACAAGTTGAATCTTGTGTTC
chr1	209815811	209816870	20	chr1	209816131	209816150	-	primary.p53+p63RE	9.61445	GCAAGTGCCAGCTTGTCCT
chr1	210321152	210321997	20	chr1	210321701	210321720	-	primary.p53+p63RE	11.5307	GCATGTCCGGTCACGTCTT
chr1	214439360	214440038	20	chr1	214439626	214439645	+	primary.p53+p63RE	12.1494	AAACATGTTGCAACATGTC
chr1	231171602	231172034	20	chr1	231171806	231171825	+	primary.p53+p63RE	10.7279	AAACAAGTCTGGGCATGGT
chr10	1054750	1055124	20	chr10	1054937	1054961	+	primary.unique-p63RE	9.10716	GGGGCATGCTGCCACAAGCCAAGG
chr10	11757455	11758431	20	chr10	11757651	11757675	+	primary.unique-p63RE	8.5497	TCAACAAGCCCTTGCACGCTGGGC
chr10	19833102	19833646	20	chr10	19833362	19833386	+	primary.unique-p63RE	10.1476	CCAGCAGGCTCAGACTTGCATGGC
chr10	24382984	24384017	20	chr10	24383124	24383143	-	primary.p53+p63RE	9.86115	GCATGAGCCAGCATGTCTG
chr10	33897210	33897723	20	chr10	33897411	33897430	-	primary.p53+p63RE	10.6972	GCAAGCTGAGGCATGACAC
chr10	41860144	41860446	20	-	-	-		Other	0	-
chr10	70146617	70147413	20	chr10	70146951	70146965	+	tertiary.unique-p63RE	6.35546	AAGCCTAGTCTCGT
chr10	72331608	72332324	20	chr10	72332076	72332100	-	primary.unique-p63RE	9.20676	GCTAACAAGTGGCGGCTTGCACAC
chr10	73888707	73889383	20	chr10	73889099	73889118	+	primary.p53+p63RE	10.2189	GAGCAGGCCCTGGCTTGTC
chr10	77898301	77899350	20	chr10	77898739	77898758	+	primary.p53+p63RE	11.1101	TGACAGGCCTGTGCATGCC
chr10	80618966	80619497	20	chr10	80619243	80619262	+	primary.p53+p63RE	12.5448	AAGCAAGCCTGGACTTGTT
chr10	86968179	86968789	20	chr10	86968543	86968567	-	primary.unique-p63RE	9.35266	CATGGCAAGCAAGGGCTTGCAGGA
chr10	103114774	103115284	20	chr10	103115086	103115105	+	primary.p53+p63RE	10.5269	AAACAAGTTTAGTCATGTT
chr10	103871904	103872856	20	chr10	103872281	103872305	+	primary.unique-p63RE	8.40667	AAGTCAAGCCAGGACAGGACCAAA
chr10	114245016	114245883	20	chr10	114245560	114245584	-	primary.unique-p63RE	8.93727	GGCGGCAGGTGGGGGCTTGTTCTG
chr10	121596929	121597880	20	chr10	121597260	121597284	-	primary.unique-p63RE	8.11141	GCGCGCAAGTTAGAACTCGCCTGC
chr10	122085156	122085881	20	chr10	122085469	122085488	+	primary.p53+p63RE	9.87578	AAACAAGTCTCAACAGGCA
chr10	125087363	125088037	20	chr10	125087735	125087754	+	primary.p53+p63RE	11.5533	CAGCATGCCACAACATGCC
chr10	133689281	133689587	20	-	-	-		Other	0	-
chr11	534367	535154	20	chr11	534752	534771	-	primary.p53+p63RE	9.95138	GCGTGCCCGGGCAGGCTAG
chr11	1830348	1831231	20	chr11	1830851	1830870	-	primary.p53+p63RE	10.2523	ACGTGCACATGCATGCCCA
chr11	12189437	12190156	20	chr11	12189754	12189773	-	primary.p53+p63RE	9.73419	GCAAGCCCAGGCCTGCCAC
chr11	12770837	12771463	20	chr11	12771060	12771084	-	primary.unique-p63RE	9.66271	GAGCACAGGTTCAGACTTGCCCCA
chr11	20050455	20051159	20	chr11	20050694	20050713	-	primary.p53+p63RE	10.6222	GCAAGTTGTAACATGCCCC
chr11	35115419	35116060	20	chr11	35115808	35115832	+	primary.unique-p63RE	10.0493	ACTGCAGGTCTGAGCTTGTTTAGG
chr11	57292908	57293652	20	chr11	57293243	57293267	+	primary.unique-p63RE	8.28296	AAGACAAGACGAGACTCGCCAGGA
chr11	63985940	63986639	20	chr11	63986292	63986306	-	tertiary.unique-p63RE	7.83817	CGTGCCAGCACCTG
chr11	65381826	65382576	20	chr11	65382297	65382321	+	primary.unique-p63RE	9.84331	GAGGCAAGCCCCTGCCTGCCCAGC
chr11	65420953	65421741	20	chr11	65421319	65421338	+	primary.p53+p63RE	12.3994	GAGCAAGCCTGGGCTTGCC
chr11	72549307	72550020	20	chr11	72549644	72549663	+	primary.p53+p63RE	11.7918	AGGCAAGCTTGGACAAGTT
chr11	73185957	73186839	20	chr11	73186513	73186537	-	primary.unique-p63RE	9.38072	AGACTCAAGCCCAGACTTGCTGGC
chr11	74942758	74943668	20	chr11	74943208	74943227	+	primary.p53+p63RE	9.6015	ATGCATGCACACACATGCA
chr11	102256218	102256687	20	chr11	102256439	102256463	-	primary.unique-p63RE	9.848	CTGTTCATGTCTGGTCTTGTACAG
chr11	113446737	113447340	20	chr11	113447106	113447125	-	primary.p53+p63RE	9.86369	GCAAGTCCAAACCTGCCCA
chr11	118622983	118623812	20	chr11	118623480	118623504	+	primary.unique-p63RE	8.67281	CGGGCAGGACTGGGCTTGTGTCTA
chr11	125082867	125083558	20	chr11	125083161	125083185	+	primary.unique-p63RE	8.98934	AGTTCAAGCCATAGCTTGCCCCGC
chr12	1013874	1014690	20	chr12	1014314	1014338	-	primary.unique-p63RE	8.45351	ATAGGCGTGTGCCATCATGCCTGG
chr12	19431673	19432511	20	chr12	19432019	19432038	+	primary.p53+p63RE	15.269	AAGCATGTCTGGGCATGTC
chr12	47863327	47864034	20	chr12	47863676	47863700	-	primary.unique-p63RE	8.94447	ACCAGCGTGCCCAGGCCTGCACCC
chr12	50642770	50643380	20	chr12	50642957	50642976	-	primary.p53+p63RE	9.90691	GCATGTTCCAACCTGTCCA
chr12	52175769	52176472	20	chr12	52176180	52176199	+	primary.p53+p63RE	11.2876	AGACGTGTTCAGACATGCA
chr12	68808639	68809264	20	chr12	68808924	68808943	-	primary.p53+p63RE	10.1674	TCAAGTTCAGACACGTTCC
chr12	105970631	105971291	20	chr12	105971046	105971065	+	primary.p53+p63RE	10.2879	AGACCTGCCAGGGCTTGCA
chr12	109820798	109821505	20	chr12	109821135	109821154	-	primary.p53+p63RE	12.1137	GCAAGTTTGGGCATGCAAA
chr12	120264262	120265116	20	chr12	120264714	120264738	+	primary.unique-p63RE	8.19252	TCTGCTAGCCAGGACACGTTCAGG
chr12	122946492	122947248	20	chr12	122946943	122946962	-	primary.p53+p63RE	12.4033	GCATGCACTGGCATGTCCC
chr12	123519098	123519832	20	chr12	123519323	123519347	+	primary.unique-p63RE	8.29625	TCTGCCTGTGCTAACAAGTTTCTG
chr12	124125439	124125899	20	chr12	124125637	124125656	+	primary.p53+p63RE	9.66849	GAGCAAGCCAGGGCTTGTG
chr13	49082549	49083211	20	chr13	49082840	49082864	+	primary.unique-p63RE	9.00353	GTGGCATGTAAGAACTTGAGCAGG
chr13	105991277	105992060	20	chr13	105991649	105991668	+	primary.p53+p63RE	9.24195	ACACAAGTCTGATCATGCT
chr13	113305035	113305679	20	chr13	113305312	113305331	+	primary.p53+p63RE	11.4901	TGGCATGCACGAACTTGTA
chr14	22979032	22979764	20	chr14	22979520	22979544	+	primary.unique-p63RE	8.02371	CAGTCAAGCTGGGGCTAGCGGCAC
chr14	34843083	34843784	20	chr14	34843413	34843432	+	primary.p53+p63RE	9.95259	GAACAAGTTAGGGCTAGTC
chr14	35213953	35214770	20	chr14	35214539	35214558	+	primary.p53+p63RE	10.7789	GGGCAAGAATGGACATGTT
chr14	50060945	50061839	20	chr14	50061246	50061265	-	primary.p53+p63RE	9.27002	GCATGTGGAGACAGGCCGG
chr14	51382375	51383147	20	chr14	51382726	51382745	+	primary.p53+p63RE	9.4696	AGGCATGCTGGCACAAGCT
chr14	69712948	69713683	20	chr14	69713298	69713317	-	primary.p53+p63RE	11.1322	ACAAGCCCAGGCTTGCCCA
chr15	33451344	33451779	20	chr15	33451571	33451595	+	primary.unique-p63RE	8.88294	GCAGCGTGCCAGAACTTGCCAGGA
chr15	58234331	58234836	20	chr15	58234657	58234676	-	primary.p53+p63RE	9.73144	GCATGCTGGCTCATGCCTG
chr15	59165393	59166320	20	chr15	59165909	59165928	-	primary.p53+p63RE	13.6096	GCATGTCTGGTCATGCCTG
chr15	59456093	59456750	20	chr15	59456364	59456383	+	primary.p53+p63RE	10.3748	AGGCAGGCCAGAGCATGTT
chr15	80608728	80609115	20	chr15	80608903	80608922	-	primary.p53+p63RE	12.3503	GCAAGCCTGAGCATGCCTT
chr15	90212141	90213041	20	chr15	90212609	90212633	+	primary.unique-p63RE	8.66735	TGCGCAAGCGTGGACAAGCCCTGC
chr15	101358723	101359832	20	chr15	101359093	101359112	+	primary.p53+p63RE	10.5728	ACGCATGCCTGTACTTGCT
chr16	11658935	11659739	20	chr16	11659284	11659308	-	primary.unique-p63RE	9.17015	CAGGACAGGCCAGGGCCTGCCTGA
chr16	34586702	34587500	20	-	-	-		Other	0	-
chr16	34592620	34593550	20	-	-	-		Other	0	-
chr16	46388561	46389059	20	-	-	-		Other	0	-
chr16	46390268	46390890	20	-	-	-		Other	0	-
chr16	46394408	46395084	20	-	-	-		Other	0	-
chr16	53041506	53042276	20	chr16	53041870	53041889	-	primary.p53+p63RE	9.86032	GCAAGCCCAGGCCTGTTTC
chr16	75305200	75306200	20	chr16	75305447	75305471	-	primary.unique-p63RE	9.19356	TGTGGCAGGTCTCTGCTTGCAAGG
chr16	75485776	75486550	20	chr16	75486175	75486194	-	primary.p53+p63RE	11.2097	GCCTGTCAAGGCATGCCCC
chr16	81499543	81500183	20	chr16	81499847	81499866	-	primary.p53+p63RE	10.8451	TCAAGTCTGGGCTTGTCAG
chr16	81526906	81527296	20	chr16	81527071	81527095	-	primary.unique-p63RE	8.77279	CCAGGCAGGCCTGGACCTGAAAGG
chr16	81531136	81532010	20	chr16	81531634	81531653	+	primary.p53+p63RE	11.0249	GGGCAAGCCTGGGCCTGCC
chr16	81580929	81581633	20	chr16	81581240	81581264	-	primary.unique-p63RE	9.40572	TTGTACAAGTGTAGTCATGCATTG
chr16	84501164	84501841	20	chr16	84501522	84501546	+	primary.unique-p63RE	9.21413	TGGGCAAGTGCCAACAGGCAGGAC
chr16	87789701	87790570	20	chr16	87789954	87789978	-	primary.unique-p63RE	8.16071	TCAGGCTTGTTCCATCAGGTCTGG
chr17	2484792	2485235	20	chr17	2485025	2485049	-	primary.unique-p63RE	8.76001	CCTGGCCTGTTAGGACTTGTGCCG
chr17	4854112	4854904	20	chr17	4854520	4854539	-	primary.p53+p63RE	11.9728	TCATGTCCTGACTTGTTTC
chr17	7354091	7354818	20	chr17	7354426	7354445	-	primary.p53+p63RE	10.4804	GCATGTCCAGGCCTGTTTG
chr17	19706870	19707605	20	chr17	19707298	19707322	+	primary.unique-p63RE	9.07254	CAGGCAGGCCCCTACACGCCTGCT
chr17	28407301	28408209	20	chr17	28407735	28407754	-	primary.p53+p63RE	9.83027	GCAGGTCCTGACAGGCCTG
chr17	28896713	28897637	20	chr17	28897025	28897049	+	primary.unique-p63RE	9.69185	CCAACAAGCCCCAGCCTGCTTGGA
chr17	31072029	31072628	20	chr17	31072323	31072342	+	primary.p53+p63RE	10.3053	AGACAAGATGGGACATGTA
chr17	35784519	35785410	20	chr17	35784991	35785010	+	primary.p53+p63RE	10.0367	AAGCTTGTGCCAACATGCC
chr17	39377665	39378237	20	chr17	39377871	39377890	-	primary.p53+p63RE	10.9698	GCATGCTGGCACATGCCTG
chr17	40193994	40194872	20	chr17	40194453	40194472	-	primary.p53+p63RE	10.8771	GCATGCCCAGGCTTGTGAG
chr17	50539873	50540576	20	chr17	50540172	50540196	-	primary.unique-p63RE	9.11154	CCTGACAGGTCAGGGCCTGCCCTC
chr17	50954014	50954804	20	chr17	50954419	50954438	+	primary.p53+p63RE	12.8917	TGACAAGCCCAGACATGCA
chr17	57901238	57901874	20	chr17	57901597	57901616	+	primary.p53+p63RE	9.32806	TCACAAGCCCAAACTTGCA
chr17	61411887	61412730	20	chr17	61412282	61412301	-	primary.p53+p63RE	9.7714	ACGTGTCCGAGCACGCCCG
chr17	72416279	72416874	20	chr17	72416538	72416557	+	primary.p53+p63RE	11.8679	AGGCATGCTGGGGCTTGCT
chr17	77045614	77046135	20	chr17	77045892	77045916	+	primary.unique-p63RE	9.5552	AGAGCAGGCCTGGACCTGCTTGCA
chr17	79228100	79228971	20	chr17	79228372	79228391	+	primary.p53+p63RE	10.3696	GAACACGCCCGGACAAGCC
chr17	80109413	80110211	20	chr17	80109792	80109811	-	primary.p53+p63RE	9.29093	GCGTGTGCAGGCATGTGCA
chr18	11669426	11670225	20	chr18	11669810	11669829	-	primary.p53+p63RE	10.1585	GCAAGACCAGACTTGCTTC
chr18	36672110	36672910	20	chr18	36672583	36672607	+	primary.unique-p63RE	8.22639	TTTTCAAGCCTCTGCTTGAATCGA
chr18	49006706	49007416	20	chr18	49006996	49007020	-	primary.unique-p63RE	8.24132	CGAGACGTGTCAAAACACGCTGGG
chr18	63476523	63477089	20	chr18	63476752	63476771	-	primary.p53+p63RE	9.49932	TCCTGCCCGAACATGTTGG
chr19	2088980	2089699	20	chr19	2089301	2089320	+	primary.p53+p63RE	9.90395	GTACAAGTCTGGGCTTGAA
chr19	3154781	3155460	20	chr19	3155153	3155177	-	primary.unique-p63RE	9.58157	TGGGGCAAGTCCCTTCTTGCTTGA
chr19	10535638	10536089	20	chr19	10535869	10535893	-	primary.unique-p63RE	9.98874	GTGGGCAAGCTGAGGCCTGCTGGA
chr19	14525571	14526379	20	chr19	14525905	14525924	-	primary.p53+p63RE	9.51006	ACGAGCCCTGGCTTGTCTA
chr19	16733801	16734353	20	chr19	16734190	16734209	-	primary.p53+p63RE	9.75395	ACAAGTGTGGACACGTCCT
chr19	19776295	19776978	20	chr19	19776649	19776668	-	primary.p53+p63RE	12.3816	ACATGTCCTAGCATGCTCA
chr19	33298362	33298920	20	chr19	33298672	33298696	+	primary.unique-p63RE	9.84669	TTAGCAAGCTGCGACCTGCCCCAG
chr19	37979608	37980359	20	chr19	37979978	37979997	-	primary.p53+p63RE	9.4055	GCAGGTCTAGGCCTGCCCT
chr19	38698825	38699485	20	chr19	38699201	38699220	+	primary.p53+p63RE	11.0545	GAGCATGCCCCAGCTTGCA
chr19	38786619	38787217	20	chr19	38786761	38786775	-	tertiary.unique-p63RE	7.9252	CACGTTGGGACTTG
chr19	41218359	41219222	20	chr19	41218705	41218729	-	primary.unique-p63RE	9.15496	CTCTGCGTGTCTCTGCTTGTCCTA
chr19	45231674	45232505	20	chr19	45232100	45232124	-	primary.unique-p63RE	9.58114	GGGGTCAAGTCCAGGCTTGAAGAT
chr19	45400156	45400656	20	chr19	45400430	45400449	+	primary.p53+p63RE	9.72854	GGGCAGGCTGGGGCATGCT
chr19	46762200	46762912	20	chr19	46762749	46762768	-	primary.p53+p63RE	10.5504	GCATGTAAAGACCTGTCTA
chr19	47725656	47726493	20	chr19	47726155	47726179	-	primary.unique-p63RE	8.33277	CAGGGCCTGCCCCGGCACGCAGCC
chr19	49765952	49766602	20	chr19	49766269	49766293	+	primary.unique-p63RE	8.25385	AACTCAAGTCCCGACACGTTGGCT
chr2	25278937	25279555	20	chr2	25279154	25279173	-	primary.p53+p63RE	9.95279	ACAAGCACAGGCCTGTCGG
chr2	26008706	26009461	20	chr2	26009041	26009060	-	primary.p53+p63RE	11.6599	ACAAGCCAGGGCTTGCTCA
chr2	28565746	28566603	20	chr2	28566074	28566093	-	primary.p53+p63RE	10.8661	GCAAGCCCGGGCAGGTTTG
chr2	37786807	37787444	20	chr2	37787096	37787115	+	primary.p53+p63RE	12.5544	TGGCAAGCCAGGACATGCT
chr2	60354592	60355161	20	chr2	60354917	60354936	-	primary.p53+p63RE	10.1556	ACTTGTACCAGCTTGTCTC
chr2	65316038	65316684	20	chr2	65316235	65316259	-	primary.unique-p63RE	9.07079	CTGAGCAAGACTGGGCCTGTAGCC
chr2	74188148	74188711	20	chr2	74188427	74188451	-	primary.unique-p63RE	9.35764	ACAGGCGGGTTGGGGCATGCCCAG
chr2	108922951	108923600	20	chr2	108923210	108923229	+	primary.p53+p63RE	11.695	AGACCTGCCTGGACAGGCC
chr2	112692447	112693249	20	chr2	112692743	112692762	+	primary.p53+p63RE	11.6944	CAGCATGCCTGAACTTGAC
chr2	112814120	112814839	20	chr2	112814556	112814575	-	primary.p53+p63RE	11.1696	TCAAGTTCATACATGTTTT
chr2	128305043	128306362	20	chr2	128306005	128306029	+	primary.unique-p63RE	8.59604	CCTGCAGGCACAGGCCTGTGTGTG
chr2	129056220	129056882	20	chr2	129056397	129056416	+	primary.p53+p63RE	9.77731	AACCCTGCCTGAACATGTT
chr2	156666156	156666837	20	chr2	156666629	156666648	-	primary.p53+p63RE	11.3795	GCATGCCATGGCATGCCAT
chr2	172196678	172197502	20	chr2	172197141	172197165	+	primary.unique-p63RE	8.93993	TGTGCAAGTGCTTGCTTGCCCTGC
chr2	173124237	173124992	20	chr2	173124634	173124653	+	primary.p53+p63RE	12.4383	TGACATGCCAGAACTTGTT
chr2	177169797	177170749	20	chr2	177170338	177170357	+	primary.p53+p63RE	14.5764	AAGCATGCCTGGGCATGTT
chr2	219286236	219287046	20	chr2	219286662	219286681	+	primary.p53+p63RE	10.2479	AGGCATGCCGCTGCTTGTA
chr2	219684463	219685131	20	chr2	219684752	219684771	+	primary.p53+p63RE	12.932	AGGCATGTCTCTGCATGCC
chr2	236691723	236692251	20	chr2	236692020	236692039	+	primary.p53+p63RE	9.70099	GAACATGCCCCGACCTGTG
chr2	238267116	238267922	20	chr2	238267518	238267537	-	primary.p53+p63RE	12.1759	TCATGTCAGTGCATGTCTG
chr20	20603185	20604037	20	chr20	20603577	20603596	+	primary.p53+p63RE	10.7197	GAACAAGCCTGAGCTAGCC
chr20	35411612	35412350	20	chr20	35412121	35412135	+	secondary.p53+p63RE	9.17882	GCCCGGGCACGCTC
chr20	37394649	37395556	20	chr20	37395042	37395061	+	primary.p53+p63RE	9.39158	GGGCATGCCTGTGCGTGTA
chr20	50844369	50845255	20	chr20	50844770	50844789	-	primary.p53+p63RE	9.6883	GCATGCTGGGACCTGCACC
chr20	56808641	56809292	20	chr20	56808926	56808950	-	primary.unique-p63RE	8.45071	AGGAGCGAGTCTCCACTTGCCTTC
chr20	62349883	62350703	20	chr20	62350150	62350174	+	primary.unique-p63RE	8.9463	CCTGCAGGCCAAGGCAAGCCCCGG
chr21	28632839	28633453	20	chr21	28633164	28633188	+	primary.unique-p63RE	9.77314	GAAGCAAGTCTGAACCTGTGTACT
chr21	33975990	33976479	20	chr21	33976221	33976240	-	primary.p53+p63RE	10.91	ACAGGCTCAGACATGCAAG
chr21	41727100	41728001	20	chr21	41727619	41727643	+	primary.unique-p63RE	9.04553	GTGGCAGGTCGCAACAGGCTGCGC
chr22	30399908	30400574	20	chr22	30400371	30400395	+	primary.unique-p63RE	9.13308	GCTGCAAGACGTGACATGACAGAA
chr22	31177370	31177891	20	chr22	31177635	31177654	-	primary.p53+p63RE	11.8798	ACAGGCTCAGGCATGCCAG
chr22	31253833	31254525	20	chr22	31254148	31254167	+	primary.p53+p63RE	11.2499	CTGCATGCCTGTACTTGTT
chr22	36329191	36330001	20	chr22	36329873	36329897	+	primary.unique-p63RE	7.85404	AATACATGCGCACACACGTGTGCA
chr22	40541270	40541693	20	chr22	40541499	40541523	+	primary.unique-p63RE	9.30946	CAGGCAAGTTGCTACAGGTCCTGA
chr22	40627551	40628106	20	chr22	40627828	40627852	+	primary.unique-p63RE	8.47692	CGGGCATGATGGCACACGCCTATA
chr22	42288696	42289299	20	chr22	42288931	42288950	+	primary.p53+p63RE	10.8729	GTGCAAGCCTGGGCAGGCC
chr22	42749095	42749837	20	chr22	42749668	42749687	+	primary.p53+p63RE	10.7557	AGGCAGGTCTGAGCTTGTT
chr3	4994860	4995473	20	chr3	4995123	4995147	-	primary.unique-p63RE	8.60716	CCCAGCCAGCCCAGGCCTGTTGCA
chr3	12759142	12759927	20	chr3	12759441	12759460	-	primary.p53+p63RE	9.28238	ACATGCCTGGTCCTGCCTC
chr3	31106009	31106713	20	chr3	31106439	31106458	-	primary.p53+p63RE	11.281	GCAAGCCCAGTCATGCTAG
chr3	37853517	37854168	20	chr3	37853886	37853910	+	primary.unique-p63RE	9.16814	TGAGCATGTAGCTGCACGTACCAA
chr3	37945895	37946617	20	chr3	37946238	37946262	-	primary.unique-p63RE	8.47355	CCTGACTTGTGGCAGCTTGTCGTG
chr3	42122516	42123141	20	chr3	42122832	42122856	-	primary.unique-p63RE	9.49795	CGGAGCAGGTCTGGTCTTGTTTTT
chr3	48402200	48402895	20	chr3	48402462	48402486	-	primary.unique-p63RE	8.89138	GGGCACGTGCCCAGGCTTGCAGGC
chr3	48432306	48433062	20	chr3	48432693	48432712	+	primary.p53+p63RE	11.5719	AGACATGAATGGACTTGCC
chr3	48598777	48599653	20	chr3	48599342	48599366	-	primary.unique-p63RE	8.98164	CTGAGCCTGTCCCTTCATGTTCTG
chr3	50157727	50158385	20	chr3	50158019	50158043	-	primary.unique-p63RE	8.49165	AAGGACGTGTGTGGGCCTGCAAGT
chr3	53269839	53270501	20	chr3	53270072	53270091	+	primary.p53+p63RE	11.0582	AGACATGACCCTGCTTGTC
chr3	63760177	63760614	20	chr3	63760333	63760352	-	primary.p53+p63RE	11.1247	ACAAGCTCAGGCTAGCCTG
chr3	93470268	93470897	20	-	-	-		Other	0	-
chr3	120111772	120112476	20	chr3	120112093	120112117	+	primary.unique-p63RE	9.69319	CCTGCAGGCCCCAGCCTGCCTGAG
chr3	159829467	159830033	20	chr3	159829715	159829734	+	primary.p53+p63RE	11.2136	ATTCATGCCTGTGCATGCC
chr3	159881622	159882359	20	chr3	159881961	159881980	+	primary.p53+p63RE	10.2712	AGGCTAGCCTGGACCTGTT
chr3	177447946	177448347	20	chr3	177448113	177448132	-	primary.p53+p63RE	9.28193	ACCTGCCCTGACCTGCTCC
chr3	184740875	184741657	20	chr3	184741327	184741346	+	primary.p53+p63RE	10.3881	CGGCAAGTCCCAACAGGCC
chr3	189833793	189834544	20	chr3	189834069	189834088	+	primary.p53+p63RE	9.95457	AGACATGACGATACTTGTT
chr3	190037848	190038454	20	chr3	190038157	190038181	+	primary.unique-p63RE	9.73587	ACTGCAAGTCAAGACCTGTCGCGA
chr3	193830527	193831417	20	chr3	193830921	193830945	-	primary.unique-p63RE	8.57127	GCAGGCGTGATGGGACTTGTCTCC
chr4	10021314	10021745	20	chr4	10021556	10021575	+	primary.p53+p63RE	9.94582	GATCATGCCTGAACAGGCA
chr4	24763603	24764230	20	chr4	24763775	24763794	+	primary.p53+p63RE	11.9789	TGGCATGACTAGGCTTGTC
chr4	49657436	49657763	20	-	-	-		Other	0	-
chr4	76781722	76782408	20	chr4	76782090	76782109	+	primary.p53+p63RE	12.137	GGGCATGTCACTACATGTT
chr4	82437352	82437993	20	chr4	82437801	82437820	+	primary.p53+p63RE	11.4009	AGGCATGCTGTAACATGCT
chr4	101693664	101694144	20	chr4	101693891	101693915	+	primary.unique-p63RE	9.29267	CGGGCAAGTGGCTACTTGCAAAGC
chr4	122798095	122798588	20	chr4	122798392	122798411	+	primary.p53+p63RE	12.4371	GGGCATGTCAGGACTTGCA
chr4	164536787	164537259	20	chr4	164536978	164536997	-	primary.p53+p63RE	12.9746	ACAAGTCCAGGCATGACTG
chr4	182736103	182736631	20	chr4	182736433	182736452	+	primary.p53+p63RE	11.7247	TAACAAGTCAGTGCATGTC
chr4	183356819	183357539	20	chr4	183357163	183357182	+	primary.p53+p63RE	10.1382	TGGCATGCCTGGACTCGTG
chr5	10528413	10528820	20	chr5	10528587	10528606	-	primary.p53+p63RE	10.89	GCAAGTCCAAACCTGCCTC
chr5	10630057	10630560	20	chr5	10630322	10630341	+	primary.p53+p63RE	10.9189	GAGCCAGCCTGGGCATGCT
chr5	19322718	19323298	20	chr5	19322953	19322972	-	primary.p53+p63RE	11.5592	GCCTGTCTGGGCTTGCTCT
chr5	31947933	31948604	20	chr5	31948242	31948261	+	primary.p53+p63RE	11.3044	GAGCAAGCTGGGACATGTA
chr5	49601398	49602535	20	-	-	-		Other	0	-
chr5	57494628	57495131	20	chr5	57494873	57494892	-	primary.p53+p63RE	10.7457	GCTAGTCGAGGCATGCAAA
chr5	57889286	57889933	20	chr5	57889561	57889580	-	primary.p53+p63RE	9.34745	GCAAGTTGGAGCATGATTG
chr5	77879706	77880318	20	chr5	77880100	77880119	-	primary.p53+p63RE	9.67282	GCAAGTACGAACTTGTTAT
chr5	136033618	136034198	20	chr5	136033972	136033991	-	primary.p53+p63RE	12.1239	GCATGTGCGAACATGTCTG
chr5	141514109	141514795	20	chr5	141514478	141514497	-	primary.p53+p63RE	10.1256	ACGTGCTCAGACAAGTATG
chr5	151615262	151615899	20	chr5	151615575	151615599	+	primary.unique-p63RE	8.25324	GGGTCGTGCCCTGACTTGTGCAAA
chr5	173292081	173292838	20	chr5	173292585	173292604	-	primary.p53+p63RE	12.6099	GCAAGACCAGGCATGTCCA
chr5	178288671	178289216	20	chr5	178289020	178289044	+	primary.unique-p63RE	8.65174	TCAGCAAGTTCACACACGCTAGCC
chr6	17865068	17865960	20	chr6	17865490	17865514	+	primary.unique-p63RE	8.46616	AGCGCAAGACCAGACAGGTTCTTC
chr6	18352854	18353376	20	chr6	18353028	18353047	+	primary.p53+p63RE	9.35091	AGACAAGCAGGGACCTGCC
chr6	35485933	35486698	20	chr6	35486343	35486357	+	tertiary.unique-p63RE	7.15932	GCGCCCAGACTCGC
chr6	36608020	36608506	20	chr6	36608298	36608317	-	primary.p53+p63RE	11.9128	GCATGTTGGCACATGCCTG
chr6	36666914	36667532	20	chr6	36667259	36667278	-	primary.p53+p63RE	10.9259	ACAAGCCCGGGCAAGGCCA
chr6	37083246	37083811	20	chr6	37083450	37083474	-	primary.unique-p63RE	10.2339	TGCTGCAAGTCAGAACTTGCACCC
chr6	43088711	43089268	20	chr6	43088864	43088888	+	primary.unique-p63RE	9.44581	GTTGCAGGCCCTGGCTTGTAGGTG
chr6	47788135	47788595	20	chr6	47788377	47788401	-	primary.unique-p63RE	8.05731	CTGAACTAGACTAGGCTTGAATAA
chr6	51299878	51300435	20	chr6	51300172	51300191	-	primary.p53+p63RE	11.3876	GCATGCCCTGTCTTGTCTT
chr6	56746577	56747256	20	chr6	56746897	56746916	+	primary.p53+p63RE	9.9939	AGGCGTGACTGGACTTGCT
chr6	73704184	73704600	20	chr6	73704323	73704342	-	primary.p53+p63RE	10.9738	GCATGCCCCTGCAAGCCTG
chr6	78810580	78811216	20	chr6	78811026	78811045	+	primary.p53+p63RE	10.5189	GAGCAAGCCCTGTCATGCC
chr6	79453350	79454060	20	chr6	79453697	79453716	-	primary.p53+p63RE	12.8347	GCATGTTCAGGCATGCATG
chr6	125045967	125046662	20	chr6	125046249	125046273	-	primary.unique-p63RE	8.72268	CAGATCATGTTGAGTCTTGTGCAG
chr6	138034958	138035489	20	chr6	138035179	138035198	-	primary.p53+p63RE	9.94092	ACCTGCCCGGACTTGCCAC
chr6	158049386	158050274	20	chr6	158049699	158049718	-	primary.p53+p63RE	9.94945	GCAGGTATGGACATGCCTC
chr7	368800	369762	20	chr7	369302	369326	-	primary.unique-p63RE	8.92516	CGGCACATGCCTGGTCTTGTGGGA
chr7	613395	614263	20	chr7	613804	613828	-	primary.unique-p63RE	9.71167	AAGCGCAGGTTGGGACTTGCACGG
chr7	5525923	5526634	20	chr7	5526214	5526233	-	primary.p53+p63RE	11.3779	GCGTGCTGGGGCATGCCTG
chr7	26087590	26088272	20	chr7	26087896	26087920	+	primary.unique-p63RE	9.85293	AGTGCAGGTCCAGACAAGCAGATC
chr7	44307957	44308581	20	chr7	44308126	44308150	-	primary.unique-p63RE	8.20128	TGGGGCAGGCACGTTCTTGTTCTG
chr7	47557734	47558673	20	chr7	47558230	47558254	+	primary.unique-p63RE	9.22359	AGAGCAAGCTACAGCAAGCCGGTG
chr7	49866165	49866960	20	chr7	49866471	49866495	+	primary.unique-p63RE	9.61895	TTTGCAAGCCTCTGCTTGCATTAC
chr7	73855258	73855965	20	chr7	73855561	73855585	-	primary.unique-p63RE	9.76743	CCAGGCATGACGAGACCTGCACAG
chr7	100272048	100272504	20	chr7	100272273	100272292	+	primary.p53+p63RE	9.56336	CGGCCTGCCAGGACTTGTA
chr7	101767462	101768069	20	chr7	101767690	101767714	+	primary.unique-p63RE	9.2538	AGAACAAGACCCTGCTTGTCCAAG
chr7	128962293	128963223	20	chr7	128963035	128963054	+	primary.p53+p63RE	11.1062	AGACATGCCCCAGCTAGTT
chr7	131188240	131188898	20	chr7	131188521	131188540	-	primary.p53+p63RE	11.2938	GCTAGCCTGGACTTGTTCG
chr8	8664934	8665477	20	chr8	8665227	8665246	-	primary.p53+p63RE	11.3832	GCATGTGCAAACTTGTTCA
chr8	27672987	27673535	20	chr8	27673302	27673321	+	primary.p53+p63RE	10.7504	GGGCAGGCCTGGACATGTG
chr8	66124007	66124717	20	chr8	66124440	66124459	-	primary.p53+p63RE	12.1197	GCATGCCTGTGCATGCCCA
chr8	124856629	124857297	20	chr8	124856949	124856963	+	secondary.p53+p63RE	9.25629	GTCTGGGCTTGCTC
chr8	126579921	126580461	20	chr8	126580157	126580176	-	primary.p53+p63RE	10.8113	GCCTGTGCTGGCATGCCTG
chr8	127401135	127401727	20	chr8	127401422	127401446	+	primary.unique-p63RE	9.46867	CCAGCAAGTCCCAACAAGAAGGCA
chr8	127661221	127661828	20	chr8	127661454	127661473	+	primary.p53+p63RE	9.3986	ACTCATGCCTCAACTTGCC
chr8	129005084	129005559	20	chr8	129005309	129005328	-	primary.p53+p63RE	10.4743	GCCTGTATGGGCATGCCAT
chr8	144448003	144448739	20	chr8	144448413	144448432	-	primary.p53+p63RE	11.2165	ACATGCTGGGGCCTGTCCC
chr9	16144344	16144965	20	chr9	16144701	16144720	-	primary.p53+p63RE	9.45168	GCATGAATGGGCACGCCTG
chr9	34072348	34072938	20	chr9	34072591	34072610	-	primary.p53+p63RE	10.2377	GCAGGCCCTGACATGCCCT
chr9	38024080	38024720	20	chr9	38024448	38024472	+	primary.unique-p63RE	9.91164	CCTGCAGGCTCCGACTTGTTAGGA
chr9	38096219	38096717	20	chr9	38096397	38096421	+	primary.unique-p63RE	9.96073	AAAGCAAGTTCCAACCTGCAGGCC
chr9	73132128	73132754	20	chr9	73132485	73132504	-	primary.p53+p63RE	10.8053	ACATGCTGAGACAGGCTCA
chr9	78288137	78289074	20	chr9	78288665	78288684	+	primary.p53+p63RE	11.4617	GGGCAAGACAGGGCATGTC
chr9	90014059	90014820	20	chr9	90014533	90014557	+	primary.unique-p63RE	9.35532	ATTGCAGGTTCTGGCTTGCCCTTT
chr9	90942475	90943444	20	chr9	90942805	90942824	-	primary.p53+p63RE	11.2157	GCCAGCCCAGACTTGTTTG
chr9	92147101	92147848	20	chr9	92147445	92147464	+	primary.p53+p63RE	13.1675	AGACTTGCCTGGGCTTGTT
chr9	108543277	108543909	20	chr9	108543657	108543681	+	primary.unique-p63RE	9.0417	CACACAAGCCATGACATGATGAGC
chr9	109449162	109449745	20	chr9	109449514	109449533	-	primary.p53+p63RE	10.3246	GCAAGTCGTGGCAGGCCCC
chr9	116686809	116687702	20	chr9	116687228	116687247	-	primary.p53+p63RE	11.4422	ACAAGCCCCAGCATGCTGG
chr9	116856049	116856681	20	chr9	116856364	116856383	+	primary.p53+p63RE	10.4743	TTACATGCCCAGGCAGGCA
chr9	124818075	124819034	20	chr9	124818238	124818257	+	primary.p53+p63RE	9.21678	GGGCAAGTTCCTACATGAA
chr9	130561042	130561447	20	chr9	130561258	130561282	+	primary.unique-p63RE	9.23974	AGTGCAGGCCTGGGCCTGTCCTCA
chr9	131633199	131634012	20	chr9	131633618	131633637	-	primary.p53+p63RE	9.90313	ACATGTGCAGACATGTGCC
chr9	132630641	132631536	20	chr9	132631018	132631037	+	primary.p53+p63RE	10.1837	GGACATGCTTCTGCTTGCA
chr9	136623597	136624560	20	chr9	136624148	136624172	-	primary.unique-p63RE	10.0686	CTGCACATGTCCCAGCCTGCTCGG
chr9	137708500	137709279	20	chr9	137708800	137708819	-	primary.p53+p63RE	9.34613	GCATGTCCAGGCCTGAGTG
chrGL000225.1	50743	51091	20	-	-	-		Other	0	-
chrKI270438.1	104452	104974	20	-	-	-		Other	0	-
chrKI270438.1	109196	109947	20	-	-	-		Other	0	-
chrKI270442.1	92259	92557	20	-	-	-		Other	0	-
chrKI270467.1	1840	3551	20	-	-	-		Other	0	-
chrX	103441791	103442914	20	chrX	103442090	103442109	+	primary.p53+p63RE	10.3355	-
chr1	1217866	1218386	19	chr1	1218031	1218050	+	primary.p53+p63RE	9.94814	AAACAAGCCTACACATGAT
chr1	1421146	1421764	19	chr1	1421483	1421502	-	primary.p53+p63RE	11.37	ACAAGCAGGAACATGCTTG
chr1	3690229	3690866	19	chr1	3690597	3690616	-	primary.p53+p63RE	9.68045	GCAAGCTGAGGCCTGCCCC
chr1	3698702	3699504	19	chr1	3699313	3699332	-	primary.p53+p63RE	9.43756	CCAAGTTCAGACATGCCCA
chr1	6488665	6489492	19	chr1	6489224	6489243	-	primary.p53+p63RE	10.0497	GCATGCATGGGCAGGCCAG
chr1	8004726	8005169	19	chr1	8004896	8004920	+	primary.unique-p63RE	7.74983	CAGACAAGTCTTATCACGCGTCTG
chr1	9891019	9891488	19	chr1	9891265	9891284	+	primary.p53+p63RE	9.70396	AGGCAGGCCTGGGCATGGC
chr1	12618162	12618904	19	chr1	12618465	12618484	+	primary.p53+p63RE	10.2704	CTGCAAGCCGGGACTTGCC
chr1	14733021	14733578	19	chr1	14733271	14733290	-	primary.p53+p63RE	11.8921	GCAAGTCAGGACAAGTCCC
chr1	15400573	15401151	19	chr1	15400857	15400881	+	primary.unique-p63RE	9.33069	TTTTCAAGTTTCTACTTGCCTTAT
chr1	15799050	15799465	19	chr1	15799249	15799273	-	primary.unique-p63RE	8.38573	TCAGACGGGCTGTGGCATGCAGGG
chr1	16184425	16185097	19	chr1	16184794	16184813	+	primary.p53+p63RE	11.1103	GGGCATGTCCCCACTTGCT
chr1	16925503	16926027	19	chr1	16925757	16925781	-	primary.unique-p63RE	9.57578	CACGACTAGTTGGGACTTGTAGAG
chr1	17215224	17216017	19	chr1	17215603	17215627	-	primary.unique-p63RE	9.0963	CTGGGCTTGTGGCTACTTGCTCTT
chr1	19361075	19361701	19	chr1	19361392	19361416	-	primary.unique-p63RE	8.69298	AGCCACAAGTCTCAACCTGACATT
chr1	24285073	24285627	19	chr1	24285314	24285333	-	primary.p53+p63RE	11.471	GCAGGCCCAGACAAGCCTG
chr1	27342638	27343456	19	chr1	27343072	27343096	-	primary.unique-p63RE	9.11766	GGACACAAGCCAGGACCTGCCCGC
chr1	32963726	32964293	19	chr1	32963898	32963917	-	primary.p53+p63RE	9.92703	ACTAGTCTGGGCTTGCCTG
chr1	34755013	34755872	19	chr1	34755531	34755555	-	primary.unique-p63RE	9.41429	TTAGACAGGACTGAGCATGCAAGA
chr1	43152585	43153352	19	chr1	43153012	43153031	+	primary.p53+p63RE	12.3611	AGACATGCCTGGGCTTGAA
chr1	45612969	45613656	19	chr1	45613424	45613443	+	primary.p53+p63RE	10.7533	AGGCTTGTGCCAACATGCC
chr1	46183112	46183599	19	chr1	46183396	46183420	+	primary.unique-p63RE	7.89902	CTGGCAAGTGAGGACTAGTCACCA
chr1	54167646	54168316	19	chr1	54167958	54167982	+	primary.unique-p63RE	9.00041	GGAGCAAGTATGGGCCTGTGGCCT
chr1	58572484	58573221	19	chr1	58572850	58572874	+	primary.unique-p63RE	9.58742	AAGGCAGGCTGCAACTTGCTGGGC
chr1	59015635	59016356	19	chr1	59015981	59016005	-	primary.unique-p63RE	9.70746	TTGTGCCTGTTGGCACATGTTTCA
chr1	67348145	67348702	19	chr1	67348475	67348494	+	primary.p53+p63RE	10.1679	AAGCAAGTCACGTCATGTC
chr1	67686395	67687019	19	chr1	67686774	67686793	+	primary.p53+p63RE	13.3789	GAACATGTCTAAGCATGCT
chr1	88060989	88061406	19	chr1	88061245	88061259	+	tertiary.unique-p63RE	7.2839	GTGCCACAGCAGGT
chr1	93960764	93961229	19	chr1	93961015	93961034	+	primary.p53+p63RE	10.8171	AGGCAGGCCTAGGCTTGCC
chr1	109028400	109028786	19	chr1	109028591	109028615	+	primary.unique-p63RE	9.68775	TAAGCATGTGCCAACACGCCCAGC
chr1	109197480	109198575	19	chr1	109198167	109198186	-	primary.p53+p63RE	11.0857	TCAAGCCAGAACATGTCTG
chr1	112687284	112687972	19	chr1	112687560	112687579	-	primary.p53+p63RE	10.6231	ACATGCAGAGTCAAGTCCA
chr1	115158081	115158556	19	chr1	115158509	115158533	-	primary.unique-p63RE	8.54153	AGGGTCATGTAGATTCTTGTAAAC
chr1	115300406	115300929	19	chr1	115300715	115300729	+	secondary.p53+p63RE	7.97163	GCCCAGGCATGCAG
chr1	115655062	115655838	19	chr1	115655446	115655470	-	primary.unique-p63RE	9.53821	GCCTGCATGCCACCACTTGCTCTT
chr1	115771642	115772298	19	chr1	115771958	115771977	-	primary.p53+p63RE	10.3173	ACGAGTCCAAGCTTGCCTC
chr1	115877472	115877840	19	chr1	115877653	115877672	+	primary.p53+p63RE	11.6115	GGGCTTGTCTGTGCATGCA
chr1	119358609	119359139	19	chr1	119358866	119358885	-	primary.p53+p63RE	10.3729	GCATGCAGGGACATGTGTG
chr1	143264139	143264418	19	-	-	-		Other	0	-
chr1	152167633	152168266	19	chr1	152167947	152167966	-	primary.p53+p63RE	10.1865	ACTAGCCCAGACAAGTGCT
chr1	152785849	152786503	19	chr1	152786170	152786189	-	primary.p53+p63RE	9.4437	GCAAGTCCTCTCATGCCCA
chr1	152811057	152811511	19	chr1	152811262	152811281	-	primary.p53+p63RE	9.4437	GCAAGTCCTCTCATGCCCA
chr1	152941060	152941803	19	chr1	152941538	152941562	+	primary.unique-p63RE	9.70969	CATGCAGGCCACAGCATGTCTCCC
chr1	154813299	154814020	19	chr1	154813662	154813681	-	primary.p53+p63RE	11.1793	TCAAGCCTTAACATGCCCG
chr1	162913289	162913901	19	chr1	162913544	162913563	-	primary.p53+p63RE	9.81944	GCATGTTGGATCATGCTTT
chr1	167662927	167663649	19	chr1	167663279	167663303	+	primary.unique-p63RE	8.77609	CCATCAGGCCTAGACCTGCAGGGG
chr1	174818818	174819542	19	chr1	174819164	174819188	+	primary.unique-p63RE	8.59142	AGAGCAAGACTCTGCCTGTCTCTA
chr1	177945789	177946588	19	chr1	177946074	177946098	+	primary.unique-p63RE	9.41817	CCCACAAGCCTCCACATGTAAAAT
chr1	181134679	181135492	19	chr1	181135143	181135162	-	primary.p53+p63RE	15.5659	GCATGCCCGGGCATGTCTG
chr1	181159205	181160116	19	chr1	181159321	181159335	-	secondary.p53+p63RE	8.2239	GGCTTGCTTGGGCA
chr1	201311513	201312185	19	chr1	201311840	201311859	-	primary.p53+p63RE	9.65102	ACAAGTTGGAGCAGGCCAG
chr1	201986922	201987344	19	chr1	201987113	201987132	-	primary.p53+p63RE	11.0514	ACTTGCCCAGGCCTGCCTC
chr1	202056576	202057193	19	chr1	202056752	202056771	-	primary.p53+p63RE	11.7581	GCAAGTATGGACAAGCCCC
chr1	202236802	202237795	19	chr1	202237312	202237331	+	primary.p53+p63RE	11.3238	AGGCAAGCCTGTGCTTGCT
chr1	202593863	202594363	19	chr1	202594030	202594054	+	primary.unique-p63RE	9.4754	CACACAAGCAGAAGCATGTTCCCA
chr1	206482397	206483150	19	chr1	206482781	206482805	+	primary.unique-p63RE	9.12763	GTTGCAAGCCCATTCTTGCCTGAA
chr1	207240669	207241310	19	chr1	207240853	207240872	-	primary.p53+p63RE	9.56065	ACATGCTCCTGCATGCTTT
chr1	209370366	209371233	19	chr1	209370833	209370852	+	secondary.unique-p63RE	9.711	ATTTGTTAGGACAGGCAGG
chr1	209415875	209416563	19	chr1	209416190	209416214	-	primary.unique-p63RE	8.59679	GAGGGCAGGTGTGTGCTTGCAAGA
chr1	223355627	223356152	19	chr1	223355948	223355972	+	primary.unique-p63RE	9.23921	CCTGCAGGCCCTGACCTGCTGGGG
chr1	223421393	223422057	19	chr1	223421872	223421891	+	primary.p53+p63RE	11.0102	AGACAGGCCTAGACAAGTT
chr1	224503442	224504237	19	chr1	224503828	224503852	+	primary.unique-p63RE	8.68315	CCTGCAGGCTCGGGCACGCTGTGC
chr1	227915658	227916357	19	chr1	227915925	227915944	+	primary.p53+p63RE	9.37525	GCTCAAGCCTGGGCTTGCC
chr1	232952803	232953489	19	chr1	232953055	232953074	-	primary.p53+p63RE	9.92544	ACTTGCCCTGACTTGTCCC
chr1	244239216	244240014	19	chr1	244239596	244239615	+	primary.p53+p63RE	11.5762	GGGCAGGCCCAGACTTGTC
chr10	1059832	1060324	19	chr10	1060113	1060137	+	primary.unique-p63RE	8.90985	CGGGCATGAGCCATCATGCCTGGC
chr10	3107421	3108123	19	chr10	3107791	3107815	+	primary.unique-p63RE	8.64762	TTGGCAGGCTTTGGCAGGCTTCGT
chr10	14648714	14649397	19	chr10	14649111	14649130	-	primary.p53+p63RE	11.5893	GCATGATCAGACATGCCTC
chr10	21315253	21315848	19	chr10	21315519	21315543	+	primary.unique-p63RE	8.33166	AGAGCAGGAAAGGGCTTGCCCAGG
chr10	21336405	21337085	19	chr10	21336705	21336729	+	primary.unique-p63RE	9.68218	CCAGCAAGCTGTCACATGCCAAGG
chr10	21368875	21369369	19	chr10	21369125	21369149	-	primary.unique-p63RE	8.35917	CATGACGTGCCCTGGCCTGCATTT
chr10	24256008	24256766	19	chr10	24256192	24256211	+	primary.p53+p63RE	10.5829	TGGCATGTCCCATCTTGTT
chr10	24820435	24821095	19	chr10	24820732	24820756	+	primary.unique-p63RE	8.47955	CTGTCAAGCTTGGGCTTGAGCAGC
chr10	29839779	29840302	19	chr10	29839992	29840016	+	primary.unique-p63RE	10.0316	TTTGCATGTACCCACTTGCACAAG
chr10	41875296	41875588	19	-	-	-		Other	0	-
chr10	43451931	43452516	19	chr10	43452302	43452326	+	primary.unique-p63RE	10.0047	CATGCAGGCCCCAGCATGTGCATT
chr10	47406033	47406827	19	chr10	47406442	47406466	+	primary.unique-p63RE	8.94242	GGGACAGGCCTGTGCTTGTGGAGC
chr10	78919859	78920530	19	chr10	78920295	78920314	-	primary.p53+p63RE	10.3549	GCATGTGCAGGCATGGCAG
chr10	79018347	79019195	19	chr10	79018956	79018980	+	primary.unique-p63RE	9.18403	GGAGCAGGCCCAAGCAGGCCCGCC
chr10	88131626	88132092	19	chr10	88131832	88131851	+	primary.p53+p63RE	9.70286	GGGCAAGTTGGGGCAGGCT
chr10	89644821	89645747	19	chr10	89645257	89645276	-	primary.p53+p63RE	10.1954	GCATGCCCAGTCCTGCCCG
chr10	93137930	93138532	19	chr10	93138317	93138336	+	primary.p53+p63RE	11.8327	GGGCTTGCCCTGGCTTGCC
chr10	95247700	95248263	19	chr10	95248038	95248062	+	primary.unique-p63RE	8.36864	AGAACAAGATAAGACAGGCAGAGC
chr10	96505177	96505854	19	chr10	96505597	96505616	-	primary.p53+p63RE	11.0108	GCAAGCCTAGGCAGGTTTG
chr10	97549889	97550694	19	chr10	97550170	97550189	+	primary.p53+p63RE	12.7668	GAGCAAGCCCAGACTTGTC
chr10	97701504	97702166	19	chr10	97701831	97701855	+	primary.unique-p63RE	9.49956	CAGGCGTGTGCCAACATGCTCAGC
chr10	100043396	100044106	19	chr10	100043539	100043558	-	primary.p53+p63RE	11.8989	CCATGCTCAGGCATGCCAG
chr10	117216714	117217462	19	chr10	117217031	117217050	+	primary.p53+p63RE	11.4119	AAACTTGTCGCAGCATGCC
chr10	119325012	119325598	19	chr10	119325287	119325306	-	primary.p53+p63RE	11.7212	GCTTGTCCAGGCTTGCCTA
chr10	119680590	119681109	19	chr10	119680646	119680660	-	tertiary.unique-p63RE	9.00033	CAGGTCTGCACTTG
chr10	122476183	122476714	19	chr10	122476416	122476435	-	primary.p53+p63RE	10.1138	TCCTGTCTGGACAGGCCTA
chr10	128063715	128064311	19	chr10	128063964	128063988	-	primary.unique-p63RE	8.75093	TCTGGCGTGTTCTGGCATGAAGGC
chr11	515095	515599	19	chr11	515345	515364	-	primary.p53+p63RE	9.80358	GCCAGCCTGGGCTTGTCTT
chr11	803925	804847	19	chr11	804413	804432	+	primary.p53+p63RE	10.6102	AGACATGTCCCAGCACGCA
chr11	1050890	1051363	19	chr11	1051166	1051190	+	primary.unique-p63RE	8.24753	CCAACATGCAGGCACACGCAGGCA
chr11	1307177	1307620	19	chr11	1307352	1307366	-	tertiary.unique-p63RE	8.96681	CTTGCCAGCACAGG
chr11	2256504	2257281	19	chr11	2256760	2256784	+	primary.unique-p63RE	8.57077	ACAGCGAGTCTCAACCTGCTCCAG
chr11	10899176	10900357	19	chr11	10899644	10899668	-	primary.unique-p63RE	9.94405	GCTTACATGCTCAGGCCTGCAGGA
chr11	12065881	12066523	19	chr11	12066119	12066138	-	primary.p53+p63RE	12.343	GCATGTCCAAGCTTGCCCA
chr11	16097480	16097990	19	chr11	16097743	16097762	-	primary.p53+p63RE	9.93563	ACAAGTACAAACATGGTCC
chr11	17798152	17798909	19	chr11	17798433	17798457	-	primary.unique-p63RE	7.78229	ACAGCCAAGCTGGGACAGGCAGAG
chr11	20483924	20484309	19	chr11	20484133	20484152	-	primary.p53+p63RE	14.0574	GCATGCCCAGGCATGCTTA
chr11	27228185	27228696	19	chr11	27228394	27228418	-	primary.unique-p63RE	8.79313	TGGCTCCTGTCACAACATGTTGAA
chr11	30197692	30198302	19	chr11	30198028	30198047	+	primary.p53+p63RE	12.6839	AGGCTAGCCTGGGCATGTT
chr11	35567600	35568397	19	chr11	35567928	35567952	-	primary.unique-p63RE	8.88201	TTGGACAAGATCTAGCATGATGCT
chr11	45931131	45931642	19	chr11	45931296	45931315	+	secondary.unique-p63RE	9.03239	ATGGGCCCAGACAAGTTGA
chr11	57788270	57788939	19	chr11	57788572	57788591	+	primary.p53+p63RE	10.648	AGGCTAGTCCCCACATGTC
chr11	61369536	61370310	19	chr11	61369869	61369893	+	primary.unique-p63RE	8.91478	ATTTCAAGCCTGTGCTTGTCTTGT
chr11	62599745	62600406	19	chr11	62600098	62600117	-	primary.p53+p63RE	10.4003	ACCTGCAGGGACATGCCCA
chr11	64120854	64121584	19	chr11	64120970	64120989	-	primary.p53+p63RE	10.0945	ACAGGTCAGGTCATGCCCT
chr11	64542594	64543132	19	chr11	64542936	64542960	+	primary.unique-p63RE	8.34539	CGGACAGGAATCGACAAGCCGAGG
chr11	64842142	64843571	19	chr11	64843177	64843196	-	primary.p53+p63RE	9.86307	ACAAGTAGAGACAAGCAGG
chr11	65592596	65593470	19	chr11	65593007	65593026	-	primary.p53+p63RE	10.4219	GCAAGCAGGGGCTTGTCCT
chr11	66339064	66339425	19	chr11	66339221	66339235	+	secondary.p53+p63RE	8.99999	GCCTGGGCCTGCTC
chr11	70063452	70064134	19	chr11	70063754	70063778	+	primary.unique-p63RE	8.73543	GTGACATGAAGGGACACGCCTCAG
chr11	74135223	74135698	19	chr11	74135418	74135437	+	primary.p53+p63RE	11.1349	CAGCTTGCCCGGACTTGCA
chr11	74504829	74505315	19	chr11	74505124	74505143	-	primary.p53+p63RE	10.0293	ACATGAACAAACATGCACA
chr11	76824690	76825610	19	chr11	76825199	76825218	-	primary.p53+p63RE	9.21084	ACCTGTTAAAGCATGTGTG
chr11	92707052	92707592	19	chr11	92707316	92707340	-	primary.unique-p63RE	9.81388	TTGGGCAGGTCACAGCTTGTTGAG
chr11	94706201	94707472	19	chr11	94707091	94707110	-	primary.p53+p63RE	9.24338	GCCTGTTCTGACATGCAGG
chr11	94852095	94852652	19	chr11	94852385	94852404	+	primary.p53+p63RE	11.367	TAGCATGTTCCAGCTTGCC
chr11	96243234	96243652	19	chr11	96243459	96243483	+	primary.unique-p63RE	8.11105	TGTGCGTGTCCAGGCACGCGCGGA
chr11	100328778	100329544	19	chr11	100329127	100329151	-	primary.unique-p63RE	9.86127	AAGAGCAGGTTGAGGCTTGTTACT
chr11	113384540	113385015	19	chr11	113384778	113384802	-	primary.unique-p63RE	9.05433	TGGGGCCTGCCAGAACCTGTCCAG
chr11	118988246	118988648	19	chr11	118988380	118988399	+	primary.p53+p63RE	10.106	AGACAAGTCCGGGCACGAT
chr11	119691795	119692573	19	chr11	119692168	119692192	+	primary.unique-p63RE	8.51034	GCTTCCAGCTCAGACTTGTCGGGG
chr11	119845403	119846303	19	chr11	119845900	119845919	+	primary.p53+p63RE	11.3309	GGACAGGCCCAAACATGCT
chr11	120135707	120136451	19	chr11	120136016	120136040	-	primary.unique-p63RE	9.47101	ATCCACAAGCCTGCACTTGCCTCT
chr11	120747131	120747556	19	chr11	120747368	120747387	-	primary.p53+p63RE	10.4809	GCCTGTCTTGACTTGCCCC
chr12	3299839	3300345	19	chr12	3300081	3300100	-	primary.p53+p63RE	10.1759	ACAAGACAGGACAAGTTCC
chr12	6735593	6736207	19	chr12	6735947	6735971	-	primary.unique-p63RE	9.782	AAAGGCAGGTCAAAACTTGCTGCC
chr12	7039250	7039803	19	chr12	7039615	7039634	-	primary.p53+p63RE	11.1131	ACTTGTTCTTACATGTTCT
chr12	10716607	10717711	19	chr12	10717570	10717589	+	primary.p53+p63RE	10.6712	GGACACGTCCTAACATGCC
chr12	11801479	11802152	19	chr12	11801794	11801813	-	primary.p53+p63RE	10.4734	GCAAGTTCAGGCAGGCCAG
chr12	38904762	38905473	19	chr12	38905005	38905029	+	primary.unique-p63RE	8.77058	ACAGCAGGTTTGCACACGCCTAGC
chr12	40158766	40159283	19	chr12	40159069	40159088	-	primary.p53+p63RE	11.7995	GCAAGCACAGGCATGCACA
chr12	46702712	46703489	19	chr12	46703039	46703063	-	primary.unique-p63RE	8.78735	GGAGACAGGCTCAGTCTTGCCAGC
chr12	47876389	47877014	19	chr12	47876718	47876737	+	primary.p53+p63RE	10.1941	GGGCATGACAGGACCTGTC
chr12	52338421	52339053	19	chr12	52338774	52338793	-	primary.p53+p63RE	11.7713	ACAAGTCGGGTCATGTCAG
chr12	57095897	57096673	19	chr12	57096292	57096316	+	primary.unique-p63RE	9.53661	GCTGCAGGTGCAGGCATGTTGGGG
chr12	57175444	57176110	19	chr12	57175728	57175752	+	primary.unique-p63RE	9.33627	GGGGCAGGCCGAGGCAGGCCTCTG
chr12	57521959	57522583	19	chr12	57522320	57522344	-	primary.unique-p63RE	8.84482	GAGGTCGTGTTGTGACATGTTGAC
chr12	93122329	93123063	19	chr12	93122642	93122656	-	tertiary.unique-p63RE	7.82299	CCAGCCAGGCCAGG
chr12	96229224	96229622	19	chr12	96229434	96229453	+	primary.p53+p63RE	9.24738	TGGCGTGCCTTGGCTTGCA
chr12	103493162	103493664	19	chr12	103493378	103493397	+	primary.p53+p63RE	9.63431	GCACATGCCTCTGCTTGCT
chr12	107237109	107237694	19	chr12	107237413	107237437	+	primary.unique-p63RE	9.19805	CTTGCAAGCCCATGCTTGAATGAA
chr12	110247233	110248308	19	chr12	110247984	110248008	-	primary.unique-p63RE	8.01799	GCTGTCGTGTCTGTACCTGTTCAG
chr12	121184311	121184836	19	chr12	121184563	121184582	-	primary.p53+p63RE	10.3816	TCCTGTCCAGACACGTCCT
chr12	121939083	121939640	19	chr12	121939567	121939591	-	primary.unique-p63RE	8.07512	CTAGACATGAAGCAACTTGAGGGC
chr12	122096602	122097147	19	chr12	122096912	122096931	+	primary.p53+p63RE	10.4461	GTACATGTCCCTGCAAGTT
chr13	42696111	42696537	19	chr13	42696284	42696303	-	quartenary.uniuqe-p63RE	14.9964	GACAAGCCTGGATTTGCCA
chr13	45367378	45367878	19	chr13	45367564	45367588	-	primary.unique-p63RE	7.99646	AAAGGCTTGTGGGCACCTGCCCCC
chr13	50731277	50731826	19	chr13	50731615	50731634	-	primary.p53+p63RE	12.9617	ACAAGCCCAGGCAAGTCTA
chr13	102911348	102911862	19	chr13	102911596	102911620	-	primary.unique-p63RE	8.52029	CGCTGCTAGCTCAGACCTGCCATC
chr13	113837109	113838399	19	chr13	113837421	113837440	+	primary.p53+p63RE	12.1583	GGACACGCCTGGGCATGTC
chr14	21041826	21042498	19	chr14	21042187	21042206	-	primary.p53+p63RE	11.2035	ACATGTTTAGGCAGGTACA
chr14	22839016	22839775	19	chr14	22839370	22839389	-	primary.p53+p63RE	10.3092	ACAGGTCAGGGCAAGCCTG
chr14	34297592	34298592	19	chr14	34297933	34297952	-	primary.p53+p63RE	14.6879	ACATGTCCAGGCATGCACA
chr14	49950731	49951284	19	chr14	49950978	49950997	+	primary.p53+p63RE	9.7078	GAGCTTGCCTGTTCTTGTC
chr14	50821554	50822157	19	chr14	50821780	50821799	-	primary.p53+p63RE	9.38051	ACAAGTTGCAACATGTGTG
chr14	51395238	51395855	19	chr14	51395512	51395526	-	secondary.p53+p63RE	9.62828	GACAAGTCTGGGCT
chr14	51488599	51489288	19	chr14	51488990	51489009	-	primary.p53+p63RE	10.5727	ACAGGTACGGGCATGCATC
chr14	54312141	54312666	19	chr14	54312349	54312363	-	tertiary.unique-p63RE	9.73018	CAGGTCTGCACAGG
chr14	64680042	64680724	19	chr14	64680443	64680462	-	primary.p53+p63RE	9.66743	GCCTGTTTGGACCTGTTCT
chr14	68676442	68677042	19	chr14	68676636	68676660	-	primary.unique-p63RE	10.0255	GTGTACATGTCTACACCTGCACAG
chr14	76550480	76551213	19	chr14	76550880	76550904	-	primary.unique-p63RE	9.3964	GAGCACAGGTCCTGGCATGCAGTA
chr14	89428632	89429192	19	chr14	89428981	89429000	+	primary.p53+p63RE	13.9336	TGGCATGCCTAGGCTTGTC
chr14	90870989	90871382	19	chr14	90871156	90871175	+	primary.p53+p63RE	9.47226	CTACATGACACAACATGCC
chr14	93937348	93938042	19	chr14	93937682	93937706	+	primary.unique-p63RE	9.9129	GCAGCAAGTCCCTACCTGCCTTCT
chr14	96078367	96078781	19	chr14	96078525	96078544	-	primary.p53+p63RE	9.62616	GCTTGTTGGAGCTTGCCTG
chr14	96267404	96267853	19	chr14	96267606	96267630	+	primary.unique-p63RE	9.20162	CAGGCAAGATCCAGCCTGCACATG
chr14	105097383	105097951	19	chr14	105097640	105097664	+	primary.unique-p63RE	8.98846	CAGGCAGGCTCCAGCACGCCCTGG
chr15	41804196	41804859	19	chr15	41804543	41804567	+	primary.unique-p63RE	9.70156	GGTGCATGCTGAGACCTGTGTCCC
chr15	43219018	43219639	19	chr15	43219431	43219455	+	primary.unique-p63RE	8.46697	CTTGCAAGTCAGCACAAGCCAGCT
chr15	45162459	45163369	19	chr15	45162904	45162928	+	primary.unique-p63RE	7.83109	GTGGCAGGCCCCTGCTCGTTTCTC
chr15	60316695	60317403	19	chr15	60317099	60317118	-	primary.p53+p63RE	12.2484	ACAAGCCCTGGCTTGTTTG
chr15	63385762	63386274	19	chr15	63385904	63385923	+	primary.p53+p63RE	10.8658	GAACATGCAAGGGCTTGCT
chr15	67147025	67147414	19	chr15	67147281	67147295	-	senary.unique-p63RE	6.5903	AGGGTGGGAAATGC
chr15	68271816	68272469	19	chr15	68272081	68272095	+	secondary.p53+p63RE	8.75888	GTCTGGTCTTGTCT
chr15	68640850	68641579	19	chr15	68641125	68641144	-	primary.p53+p63RE	9.78959	GCCAGCCCAGGCTTGCTGA
chr15	71355096	71355781	19	chr15	71355399	71355418	+	primary.p53+p63RE	9.44356	GTGCATGCATGTGCATGTG
chr15	74799497	74800404	19	chr15	74799920	74799939	-	primary.p53+p63RE	10.3163	ACCTGCACGGACATGCCCA
chr15	75666600	75667077	19	chr15	75666794	75666818	-	primary.unique-p63RE	8.75939	AGGTGCTGGTTTGCACATGTCCAC
chr15	76038294	76038915	19	chr15	76038667	76038691	-	primary.unique-p63RE	9.1638	CAGGGCCTGCAGGAACTTGCCGCC
chr15	90190759	90191568	19	chr15	90191179	90191203	+	primary.unique-p63RE	8.14446	AGCTCAGGCCCCAACAGGCCCCAG
chr15	95226899	95227576	19	chr15	95227067	95227086	+	primary.p53+p63RE	12.9656	GGGCATGCCTTGACTTGCT
chr15	98760407	98760805	19	chr15	98760612	98760636	-	primary.unique-p63RE	9.19454	GTGTGCATGTTGGCTCTTGCAACG
chr16	592294	593159	19	chr16	592682	592701	+	primary.p53+p63RE	9.56464	GTGCGTGTTTGTGCATGTT
chr16	676741	677484	19	chr16	677100	677119	-	primary.p53+p63RE	9.23424	ACATGTTCATGCACGTTGG
chr16	2468242	2469010	19	chr16	2468624	2468648	-	primary.unique-p63RE	9.68054	GTGAACATGTGGTGGCTTGCAGGC
chr16	8730013	8730687	19	chr16	8730381	8730395	-	tertiary.unique-p63RE	6.99431	CGTGCTGGAACTCG
chr16	10308456	10309039	19	chr16	10308764	10308788	+	primary.unique-p63RE	9.35519	GCAGCAAGCAAAGACCTGTCCCGT
chr16	10594409	10595127	19	chr16	10594793	10594812	-	primary.p53+p63RE	10.0961	GCATGACCCAGCTTGTCTG
chr16	30490250	30490705	19	chr16	30490429	30490448	+	primary.p53+p63RE	11.7274	AAACTTGCTTGAACTTGCC
chr16	30950000	30950677	19	chr16	30950339	30950358	+	primary.p53+p63RE	12.2639	AGGCATGTCAGAGCAGGTC
chr16	31274970	31275516	19	chr16	31275225	31275244	+	primary.p53+p63RE	9.73584	ATACATGCCTTGGCACGTA
chr16	34572745	34573276	19	-	-	-		Other	0	-
chr16	34582106	34582464	19	-	-	-		Other	0	-
chr16	34587954	34588330	19	-	-	-		Other	0	-
chr16	46401277	46401734	19	-	-	-		Other	0	-
chr16	54846872	54847562	19	chr16	54847335	54847354	-	primary.p53+p63RE	9.59865	GCAGGCTGAGGCATGCCCT
chr16	66953317	66953956	19	chr16	66953554	66953573	+	primary.p53+p63RE	11.0119	AAGCAAGACTGGGCTTGTC
chr16	68658278	68658949	19	chr16	68658575	68658599	-	primary.unique-p63RE	8.13502	CACAGCGTGCCCCATCTTGTTGTA
chr16	68667996	68668791	19	chr16	68668261	68668280	-	primary.p53+p63RE	9.73444	GCAAGCCCATTCATGCCCC
chr16	68786566	68787092	19	chr16	68786775	68786799	-	primary.unique-p63RE	8.95538	TTGGACAAGTGAGCACTTGTTGTA
chr16	70699794	70700635	19	chr16	70700264	70700288	+	primary.unique-p63RE	8.17519	CCTGCAGGCCTGGGCAAGAAACCA
chr16	80552232	80552675	19	chr16	80552477	80552496	-	primary.p53+p63RE	9.92369	GCAGGCCGAGACATGCTCA
chr16	85384300	85385403	19	chr16	85384602	85384626	+	primary.unique-p63RE	9.64959	CCTGCAAGCTGGGACCTGTGCAGG
chr16	87806809	87807514	19	chr16	87807118	87807142	-	primary.unique-p63RE	9.12698	GTGGGCAGGTTGGCACCTGTACAA
chr16	88510309	88510731	19	chr16	88510553	88510567	+	tertiary.unique-p63RE	8.03746	GTGTGCAGTCTTGT
chr16	89502312	89503046	19	chr16	89502946	89502960	-	tertiary.unique-p63RE	7.20958	CGTGGTGGCACATG
chr17	924776	925449	19	chr17	925262	925281	+	primary.p53+p63RE	9.83186	GCACCTGCCTGAACAAGTC
chr17	1769923	1770529	19	chr17	1770371	1770395	-	primary.unique-p63RE	9.3093	ACAAGCAGGTGTGGGCTTGCCCTC
chr17	1981448	1982010	19	chr17	1981778	1981797	-	primary.p53+p63RE	9.73918	ACAAGCACAGTCATGCATC
chr17	2562958	2563629	19	chr17	2563274	2563293	+	primary.p53+p63RE	10.6526	GAGCAAGCCTGGGCTGGCC
chr17	10622398	10623284	19	chr17	10622785	10622809	-	primary.unique-p63RE	8.53194	CAAGGCAAGACAGAACTTGAAGGA
chr17	15963462	15964252	19	chr17	15963933	15963952	+	primary.p53+p63RE	13.8925	AGACATGTCTGAACTTGCT
chr17	19752961	19753590	19	chr17	19753329	19753348	-	primary.p53+p63RE	11.5503	ACATGCCAGGGCACGCTTG
chr17	27331228	27331664	19	chr17	27331383	27331402	+	primary.p53+p63RE	10.7555	GGGCATGTCCTCACAAGTT
chr17	28742984	28743668	19	chr17	28743155	28743174	+	primary.p53+p63RE	10.4507	GGGCCTGCCTGGACTGGCC
chr17	37551754	37552181	19	chr17	37551955	37551979	+	primary.unique-p63RE	9.44101	TTAGCAAGTAGCAACATGAAACAT
chr17	38449088	38449981	19	chr17	38449453	38449472	-	primary.p53+p63RE	10.6659	GCCTGCTGGGGCTTGTCAG
chr17	40176445	40177357	19	chr17	40176926	40176950	-	primary.unique-p63RE	9.11701	CTAGACCTGCCACAACCTGCTGCT
chr17	40537869	40538587	19	chr17	40538122	40538141	-	primary.p53+p63RE	10.6689	ACAAGCCTGGGCTTGCCTC
chr17	40547332	40548120	19	chr17	40547681	40547700	+	primary.p53+p63RE	10.3783	GTGCAAGCATCAACATGCC
chr17	42586733	42587368	19	chr17	42587122	42587146	-	primary.unique-p63RE	7.80527	ATCCACGTGTGTAAACCTGTCCCC
chr17	45043830	45044407	19	chr17	45044075	45044094	-	primary.p53+p63RE	9.8436	GCAAGTCAGATCATGTCAG
chr17	45047241	45047603	19	chr17	45047423	45047442	+	primary.p53+p63RE	10.2618	AGGCATGCACCAACACGCC
chr17	50523318	50523790	19	chr17	50523521	50523540	-	primary.p53+p63RE	9.88339	GCATGTAGGAGCATGTAGG
chr17	50798782	50799580	19	chr17	50799257	50799281	+	primary.unique-p63RE	9.4794	CTGGCAGGCCCAGACTTGCGGCTG
chr17	56717351	56717990	19	chr17	56717675	56717694	-	primary.p53+p63RE	13.6735	ACATGCCCAGGCAAGCCCA
chr17	56982279	56982787	19	chr17	56982588	56982607	+	primary.p53+p63RE	10.2107	GGACAAGCTCAGGCCTGCC
chr17	57523848	57524488	19	chr17	57524124	57524143	+	primary.p53+p63RE	12.945	AGGCTAGCCTGGGCATGCC
chr17	58093015	58093337	19	chr17	58093162	58093181	+	primary.p53+p63RE	12.178	GAGCAAGCCTGGACAGGCC
chr17	62724584	62725378	19	chr17	62724896	62724915	-	primary.p53+p63RE	10.0573	ACATGTCGTGGCACGTTCA
chr17	65058350	65058984	19	chr17	65058797	65058816	+	primary.p53+p63RE	9.55203	GTTCATGTCGTGACATGCA
chr17	65064135	65064954	19	chr17	65064484	65064503	+	primary.p53+p63RE	9.89316	TAGCAAGCTTGGACCTGCC
chr17	69607025	69607846	19	chr17	69607370	69607389	-	primary.p53+p63RE	12.4448	GCATGTCAGAACATGCCCT
chr17	72661139	72661947	19	chr17	72661460	72661469	+	quinary.p53+p63RE	7.22708	TGACAAGCC
chr17	75684927	75685338	19	chr17	75685147	75685166	-	secondary.unique-p63RE	9.44355	GTGCAAGCCCCAACATACC
chr17	76586753	76587355	19	chr17	76587066	76587085	-	primary.p53+p63RE	9.79657	GCAGGCTGTGACATGCCCC
chr17	76597226	76598095	19	chr17	76597563	76597582	-	primary.p53+p63RE	9.56325	GCAAGACCAGGCAAGCTCT
chr17	77285767	77286804	19	chr17	77286424	77286448	+	primary.unique-p63RE	8.17023	AGCTCAAGCCAGGACAGGTACAGG
chr17	77454133	77454865	19	chr17	77454355	77454379	-	primary.unique-p63RE	9.32072	CCGGACAGGTAGGGACCTGTTCCC
chr17	78351491	78352044	19	chr17	78351795	78351814	+	primary.p53+p63RE	9.72872	GCACTTGTCCATGCTTGCC
chr17	80850857	80851267	19	chr17	80851068	80851092	+	primary.unique-p63RE	9.61916	CATGCATGTGCCATCATGCCCGGC
chr17	81841283	81841915	19	chr17	81841497	81841521	-	primary.unique-p63RE	7.70729	GGCGACGTGTTGACACAGGTCCTC
chr17	82105728	82106541	19	chr17	82106097	82106116	-	primary.p53+p63RE	10.2834	GCCTGCCCAGGCCTGTCTG
chr17	82495670	82496475	19	chr17	82496027	82496046	+	primary.p53+p63RE	9.92075	CTACATGTATGGACACGTT
chr17	82835963	82836506	19	chr17	82836254	82836273	-	primary.p53+p63RE	10.413	GCCTGTGCCGGCATGCCTC
chr18	3652487	3653099	19	chr18	3652851	3652875	-	primary.unique-p63RE	8.35773	AAAGACTTGCATCAGCCTGCCACC
chr18	8685273	8685857	19	chr18	8685483	8685502	+	primary.p53+p63RE	10.9564	GAACGTGCCCGAGCAAGTC
chr18	9895419	9895901	19	chr18	9895681	9895700	-	primary.p53+p63RE	9.71814	ACTTGTCCCAGCAGGCCTA
chr18	22856869	22857358	19	chr18	22857125	22857149	+	primary.unique-p63RE	9.08668	GTTTCAAGTCTTCACATGCTTTTG
chr18	26460710	26461172	19	chr18	26460937	26460956	+	primary.p53+p63RE	12.8274	ATACTTGTCTAGACATGTT
chr18	45806222	45806845	19	chr18	45806385	45806404	-	primary.p53+p63RE	9.58825	GCATGTGGAGGCTTGCATC
chr18	61896733	61897310	19	chr18	61897006	61897030	+	primary.unique-p63RE	8.41404	AGAACAGGCAACAACACGTCCCAG
chr18	80245885	80246612	19	chr18	80246424	80246448	+	primary.unique-p63RE	9.07936	CCCGCAAGTTCGGGCACGCTCCGC
chr19	6103071	6103709	19	chr19	6103249	6103273	+	primary.unique-p63RE	8.37627	TCTACAGGCAGTGGCAAGTCAACT
chr19	18373651	18374612	19	chr19	18373946	18373965	+	primary.p53+p63RE	14.0862	AGACCTGCCCGGACATGTC
chr19	38775192	38775818	19	chr19	38775617	38775636	+	primary.p53+p63RE	11.0575	GTGCAAGTCCCAACTTGCC
chr19	40718922	40719442	19	chr19	40719203	40719227	-	primary.unique-p63RE	8.52707	GGGGACGTGTTCACACATGTGGCC
chr19	42199375	42200073	19	chr19	42199714	42199733	-	primary.p53+p63RE	10.3637	GCCTGCCCAAACACGTCCA
chr19	42270749	42271082	19	chr19	42270916	42270935	+	primary.p53+p63RE	10.0345	AGACATGCCCCTGCCTGCT
chr19	45446933	45447355	19	chr19	45447063	45447087	+	primary.unique-p63RE	8.77792	GAGGCAGGTTGGCACAGGCACAGA
chr19	45632405	45632863	19	chr19	45632595	45632619	-	primary.unique-p63RE	8.6246	CTGGACATGCCAAAACCCGCCTGC
chr19	46206132	46206796	19	chr19	46206502	46206521	+	primary.p53+p63RE	11.6538	CAACATGCCCGGACAGGTA
chr19	47623930	47624464	19	chr19	47624125	47624149	+	primary.unique-p63RE	8.51875	CAGGCGTGAGCCAACATGCCCGGC
chr19	48977666	48978218	19	chr19	48978009	48978028	-	primary.p53+p63RE	11.1061	GCAAGCAGGGGCATGCATG
chr19	56295521	56296267	19	chr19	56295687	56295711	+	primary.unique-p63RE	8.84479	CCTGCAAGTCACTGCACGTCCCTC
chr2	1704753	1705724	19	chr2	1705178	1705192	-	secondary.p53+p63RE	7.95942	AGCATGTCTGCACA
chr2	2739358	2739803	19	chr2	2739602	2739626	-	primary.unique-p63RE	8.80516	TCTGGCAAGTCTGATCCTGTCATG
chr2	20153416	20153819	19	chr2	20153615	20153639	+	primary.unique-p63RE	8.89702	GGGGCAGGAACAAACTTGTCCTGT
chr2	20212415	20213389	19	chr2	20212662	20212681	+	primary.p53+p63RE	9.96136	AGGCAAGCCGGGGCCTGCC
chr2	20356104	20356513	19	chr2	20356304	20356323	-	primary.p53+p63RE	10.7197	GCTAGCTCAGGCTTGTTCA
chr2	28377913	28378713	19	chr2	28378467	28378491	-	primary.unique-p63RE	7.75073	GAGGGCGTGTTATCGCTTGTCTCC
chr2	28436574	28437190	19	chr2	28436783	28436807	-	primary.unique-p63RE	8.44748	AGCAGCGTGTTGCCACCTGCCCAA
chr2	31401474	31402011	19	chr2	31401685	31401709	-	primary.unique-p63RE	9.67292	TAAAGCATGCTCCTGCCTGCAGGG
chr2	42371653	42372031	19	chr2	42371820	42371844	-	primary.unique-p63RE	9.50016	TTTCGCATGCTGCTGCTTGTTCAG
chr2	46172211	46172671	19	chr2	46172493	46172507	-	secondary.p53+p63RE	8.50959	GGCGTGCCTGGGCG
chr2	69667722	69668201	19	chr2	69667923	69667942	+	primary.p53+p63RE	10.5978	GGGCTAGCCGGGACAAGCC
chr2	70569928	70570557	19	chr2	70570277	70570296	+	primary.p53+p63RE	10.4896	AAACATGTTCTCACATGCA
chr2	72041305	72042013	19	chr2	72041562	72041586	+	primary.unique-p63RE	9.38757	GGTACATGTGGAAACAGGCAGGGA
chr2	73776904	73777582	19	chr2	73777252	73777271	+	primary.p53+p63RE	9.61092	AAACATGATCCAACAGGCC
chr2	74010138	74010679	19	chr2	74010446	74010465	+	primary.p53+p63RE	9.23161	GACCATGCTTCAACTTGCC
chr2	95259838	95260575	19	chr2	95260192	95260211	-	primary.p53+p63RE	9.50572	ACATGTGCTCACATGCCAC
chr2	98435744	98436037	19	chr2	98435869	98435888	-	primary.p53+p63RE	12.737	GCATGCCCAGGCTTGCTAG
chr2	101704017	101704486	19	chr2	101704215	101704234	-	primary.p53+p63RE	13.3998	GCATGTTCAGGCTTGTTCT
chr2	105404033	105404767	19	chr2	105404414	105404433	-	primary.p53+p63RE	11.8652	GCAAGTCCCTGCATGCCTT
chr2	111640299	111641126	19	chr2	111640677	111640696	+	primary.p53+p63RE	10.9173	TTACATGCCTGGTCTTGTT
chr2	137031723	137032201	19	chr2	137031980	137031999	+	primary.p53+p63RE	13.3616	AGGCATGCTCCAACATGCC
chr2	148594156	148594683	19	chr2	148594384	148594408	+	primary.unique-p63RE	8.94233	ATTGCCTGCCTCAACCTGCCTGGC
chr2	151945107	151945639	19	chr2	151945388	151945412	-	primary.unique-p63RE	8.90566	CCGGGCATGATGGCTCATGCCTGT
chr2	158892942	158893647	19	chr2	158893303	158893322	-	primary.p53+p63RE	11.8757	GCTTGTCCTGGCAAGTTCG
chr2	168524968	168525513	19	chr2	168525191	168525215	+	primary.unique-p63RE	9.07985	TTCTCAAGCTTCAGCATGCCTCGG
chr2	180222564	180223063	19	chr2	180222835	180222854	+	primary.p53+p63RE	10.4461	GAACAAGTTAGAGCTTGCC
chr2	190578130	190578943	19	chr2	190578368	190578392	+	primary.unique-p63RE	8.95002	AGAACAGGCAGGCACATGCAGGCT
chr2	201118553	201119087	19	chr2	201118822	201118841	-	primary.p53+p63RE	10.2111	GCAGGTCTGAGCTTGTCCG
chr2	220219240	220219744	19	chr2	220219482	220219506	+	primary.unique-p63RE	8.75709	TCTGCCTGTGCTGGCTTGTTTGAG
chr2	233492749	233493163	19	chr2	233492921	233492940	+	primary.p53+p63RE	11.6415	CAACATGCTTGTACTTGTC
chr2	233691092	233691842	19	chr2	233691530	233691554	-	primary.unique-p63RE	8.22542	CTGGGCAAGTCTGTTCTAGTAATT
chr2	234446560	234447191	19	chr2	234446964	234446988	-	primary.unique-p63RE	8.84806	CGTGTCATGCAGCTGCTTGCTTCA
chr2	237935792	237936270	19	chr2	237936021	237936045	-	primary.unique-p63RE	10.0133	GGCTACAAGTCCCTGCTTGCTGGT
chr2	238720252	238720833	19	chr2	238720585	238720609	-	primary.unique-p63RE	9.15597	CCCTACTAGTCCATACTTGCTCCC
chr20	858004	858597	19	chr20	858190	858214	-	primary.unique-p63RE	9.38713	TGGGACAGGATCAGACTTGCATTT
chr20	4451208	4452032	19	chr20	4451668	4451687	+	primary.p53+p63RE	11.5868	GAACAAGCCTGGGCTAGTC
chr20	7347076	7347943	19	chr20	7347634	7347653	+	secondary.unique-p63RE	11.5328	AGCTGTTGGGACATGCTGC
chr20	10733133	10733747	19	chr20	10733375	10733394	+	primary.p53+p63RE	12.7108	AGGCTAGCCCGGGCATGTT
chr20	10954264	10954840	19	chr20	10954602	10954616	+	tertiary.unique-p63RE	6.87123	GAGTGTTGACTTGT
chr20	11001797	11002444	19	chr20	11002264	11002288	-	primary.unique-p63RE	8.84872	GTCTGCCTGTTCATGCATGTGCTC
chr20	13800565	13801300	19	chr20	13800907	13800926	-	primary.p53+p63RE	10.7197	GCTAGCTCAGGCTTGTTCA
chr20	18001395	18001963	19	chr20	18001652	18001671	-	secondary.unique-p63RE	8.81771	GAACAAGCCCCAGCACACA
chr20	22762289	22763157	19	chr20	22762698	22762722	-	primary.unique-p63RE	9.65922	ATAGACAGGCCCAGGCCTGTAGAG
chr20	23100104	23100927	19	chr20	23100575	23100594	-	primary.p53+p63RE	12.0742	GCATGTATGGGCATGTATG
chr20	23139426	23139923	19	chr20	23139673	23139692	+	primary.p53+p63RE	9.97533	ATGCATGTATGGACACGTA
chr20	24338867	24339613	19	chr20	24339272	24339291	-	primary.p53+p63RE	9.98047	GCAGGTCCAAACATGCATG
chr20	31710498	31711298	19	chr20	31710935	31710954	+	primary.p53+p63RE	9.63041	AAGCCAGTCTGGGCTTGTA
chr20	35308051	35308652	19	chr20	35308317	35308331	-	secondary.p53+p63RE	8.72292	GACAAGCTCAGGCA
chr20	37358424	37359347	19	chr20	37358922	37358936	-	secondary.p53+p63RE	9.41212	GGCATGTCCTGGCT
chr20	37526036	37526706	19	chr20	37526474	37526498	+	primary.unique-p63RE	9.33924	CATGCATGCCCCAGCAGGATCCAG
chr20	45339049	45339583	19	chr20	45339362	45339386	-	primary.unique-p63RE	8.27991	GTGTTCGTGTGTATACATGCACAG
chr20	47125752	47126527	19	chr20	47126092	47126111	-	primary.p53+p63RE	9.47445	GCAAGCCCAGACAAGGCCC
chr20	51258453	51258968	19	chr20	51258711	51258735	+	primary.unique-p63RE	7.98714	GACTCAGGCCTGGGCAAGCACCGC
chr20	54123520	54124116	19	chr20	54123884	54123908	-	primary.unique-p63RE	8.55323	AAAGTCATGTTGCCTCTTGCCAAA
chr20	56359339	56360362	19	chr20	56359818	56359842	+	primary.unique-p63RE	9.37668	ATGGCAAGCCCAGACACGCGGAGC
chr20	61683515	61684134	19	chr20	61683829	61683853	-	primary.unique-p63RE	9.63168	TTGTACAAGCCTGTGCCTGCCTGC
chr20	62856785	62857668	19	chr20	62857220	62857234	-	tertiary.unique-p63RE	7.92947	CGAGCCTGGGCATA
chr21	26390013	26390691	19	chr21	26390510	26390534	-	primary.unique-p63RE	8.44275	TCACTCATGTTAGAACCTGACACT
chr21	34813356	34813949	19	chr21	34813683	34813707	-	primary.unique-p63RE	8.78993	GGGTACAGGCTAGCACTTGCCTCT
chr21	35522055	35522515	19	chr21	35522328	35522347	+	primary.p53+p63RE	9.85944	TGACATGCCACCACTTGCT
chr21	38903517	38904246	19	chr21	38903786	38903810	+	primary.unique-p63RE	8.85694	GGGACAGGCCTCCACAAGTCCAAT
chr21	42170983	42171693	19	chr21	42171269	42171293	-	primary.unique-p63RE	8.77965	ACACGCAGGTTGGGGCAGGCTCTA
chr22	23903223	23903681	19	chr22	23903404	23903423	+	primary.p53+p63RE	10.3201	GGGCAGGCCCAGGCTTGCT
chr22	26493347	26494156	19	chr22	26493809	26493828	-	primary.p53+p63RE	11.547	GCATGCTCAGGCATGAATG
chr22	26567951	26568642	19	chr22	26568273	26568297	-	primary.unique-p63RE	7.77679	CGAAACAAGTCAGCACAAGAAAGA
chr22	27719321	27719902	19	chr22	27719682	27719701	+	primary.p53+p63RE	10.8952	ACGCTAGCCCAGGCATGTC
chr22	29070983	29072075	19	chr22	29071565	29071589	-	primary.unique-p63RE	8.67103	GGGCGCAGGTCTGCACTTGCAAGC
chr22	32644179	32644892	19	chr22	32644580	32644604	-	primary.unique-p63RE	9.66125	TCGCACATGCAGGCACATGCACAG
chr22	35443302	35443808	19	chr22	35443464	35443483	+	primary.p53+p63RE	10.6585	AGACATGAGCCAACATGTC
chr22	37749873	37750343	19	chr22	37750069	37750083	+	tertiary.unique-p63RE	9.08612	TTGTACAGACACGT
chr22	41280017	41280715	19	chr22	41280254	41280273	-	primary.p53+p63RE	11.2761	GCATGTCCAGACCAGTTCC
chr22	42425514	42426257	19	chr22	42425841	42425860	-	primary.p53+p63RE	9.32758	GCGAGCTCAGTCATGCCCC
chr22	42918433	42918856	19	chr22	42918635	42918659	+	primary.unique-p63RE	9.1201	CCAACAAGACACCACATGCCCAGC
chr22	45469508	45470267	19	chr22	45469923	45469942	+	primary.p53+p63RE	11.3604	GGGCAGGCCTGGACTTGTT
chr22	46514490	46515331	19	chr22	46514757	46514771	+	secondary.p53+p63RE	8.98562	GCCCAGCCCTGTCC
chr3	11529724	11530504	19	chr3	11530256	11530275	-	primary.p53+p63RE	9.31831	GCAAGCAGTGGCATGCTCT
chr3	13890724	13891227	19	chr3	13890970	13890989	-	primary.p53+p63RE	11.4021	GCATGTCCTGGCCTGTTTA
chr3	14199423	14200063	19	chr3	14199550	14199569	+	primary.p53+p63RE	10.3278	GTACATGCCCCTGCAAGTT
chr3	49358339	49358872	19	chr3	49358520	49358539	+	primary.p53+p63RE	10.8373	AGGCATGTCTGGTCTGGCC
chr3	49803543	49804382	19	chr3	49803968	49803992	-	primary.unique-p63RE	9.68919	CCCTGCATGCTGCAGCCTGCCAGA
chr3	52053422	52054303	19	chr3	52053829	52053853	+	primary.unique-p63RE	9.21587	CACACAGGTCTCAACAGGCCCAGA
chr3	52106942	52107517	19	chr3	52107135	52107154	-	primary.p53+p63RE	11.8868	ACATGCCTTGGCATGTGCG
chr3	112378887	112379673	19	chr3	112379162	112379181	+	primary.p53+p63RE	12.4001	AGGCATGACTAAACATGCT
chr3	122789761	122790386	19	chr3	122790137	122790156	+	primary.p53+p63RE	12.3075	AGGCATGCACCAGCATGCC
chr3	126753107	126753863	19	chr3	126753437	126753461	+	primary.unique-p63RE	8.63117	GGAGCATGCTGCAGCCCGCCTGCA
chr3	129995033	129995582	19	chr3	129995396	129995415	-	primary.p53+p63RE	9.64671	ACAAGTGCTGACAGGTCTG
chr3	139434798	139435435	19	chr3	139435071	139435095	+	primary.unique-p63RE	9.26091	GGTGCCAGCCCTGACTTGTATGGC
chr3	139715690	139716197	19	chr3	139715868	139715887	+	primary.p53+p63RE	9.80074	GGGCAAGTTGGAACTTGCA
chr3	141308481	141309125	19	chr3	141308865	141308889	+	primary.unique-p63RE	9.12693	GTAGCAAGTAGAGACACGCTCTGT
chr3	143851094	143851833	19	chr3	143851444	143851468	+	primary.unique-p63RE	8.39077	ACTGCAAGATGCGACACGCAAGTG
chr3	150469295	150469958	19	chr3	150469677	150469701	+	primary.unique-p63RE	8.19661	TGAACAAGTAGAGACTTGGCAATA
chr3	153138469	153139183	19	chr3	153138834	153138853	-	primary.p53+p63RE	9.83769	ACATGTTCTGTCAGGTCAG
chr3	156680955	156681444	19	chr3	156681141	156681155	-	tertiary.unique-p63RE	6.51339	CATGTTGAGCCTTG
chr3	166444183	166445121	19	chr3	166444454	166444478	+	primary.unique-p63RE	8.96253	GCTGCAAGCAGTGACACGCTCTTG
chr3	182182473	182182983	19	chr3	182182758	182182782	-	primary.unique-p63RE	8.60186	GTGAGCAAGCCGGGGCCTGAGAAT
chr3	187183063	187183660	19	chr3	187183380	187183399	-	primary.p53+p63RE	11.691	GCTTGTGTGGGCATGCCCA
chr3	188348688	188349126	19	chr3	188348853	188348867	-	tertiary.unique-p63RE	6.29693	CATGCTGTACCATG
chr3	194089499	194090170	19	chr3	194089817	194089831	+	tertiary.unique-p63RE	7.86711	AAGGCCAAACTTGC
chr3	194330667	194331071	19	chr3	194330860	194330879	+	primary.p53+p63RE	9.54332	GAACAGGCCTGGGCATGGC
chr3	197394367	197395095	19	chr3	197394436	197394460	+	primary.unique-p63RE	8.07803	TGAGCATGCCACGGCAGGAGAGGA
chr4	2937020	2937870	19	chr4	2937513	2937532	-	primary.p53+p63RE	9.67857	GCAGGTCCCAACAAGCCTT
chr4	3436859	3437314	19	chr4	3437090	3437109	+	primary.p53+p63RE	10.4947	GGGCAGGCCCTGGCATGTA
chr4	3484535	3485255	19	chr4	3484826	3484850	+	primary.unique-p63RE	8.90804	GCAGCATGTGTGGGCAGGTGCCGT
chr4	4392486	4392863	19	chr4	4392676	4392700	-	primary.unique-p63RE	8.95525	CACTGCCTGTCAGGGCCTGCCTGG
chr4	5773021	5773790	19	chr4	5773398	5773417	+	primary.p53+p63RE	12.7296	GGACTAGCCTGGGCATGTT
chr4	40256195	40256706	19	chr4	40256497	40256521	-	primary.unique-p63RE	9.74461	TTGGGCAAGTCGGGACTTGAGGGC
chr4	52837660	52838187	19	chr4	52837872	52837891	+	primary.p53+p63RE	9.95443	TCACTTGCCCCAACTTGCC
chr4	139887873	139888487	19	chr4	139888115	139888134	+	primary.p53+p63RE	9.22961	AGGCCTGTCTCTGCAGGCC
chr4	140308269	140308913	19	chr4	140308628	140308652	-	primary.unique-p63RE	8.37159	GCCGGCTTGTCTGTGCACGCACGC
chr4	145881977	145882464	19	chr4	145882181	145882205	-	primary.unique-p63RE	8.54599	GCTCACCTGCCCTGACATGCAATG
chr4	147820943	147821415	19	chr4	147821137	147821156	-	primary.p53+p63RE	9.91575	GCGAGCCTGGGCTTGTTCT
chr4	156771323	156771851	19	chr4	156771609	156771628	+	primary.p53+p63RE	12.6877	GGGCAAGTCTGAACATGAC
chr4	167897102	167897508	19	chr4	167897324	167897343	-	primary.p53+p63RE	12.3601	GCATGCCCAGGCAAGACCC
chr4	168811179	168811711	19	chr4	168811456	168811475	+	primary.p53+p63RE	10.069	AGGCATGATGGCACATGCC
chr4	184328115	184328557	19	chr4	184328323	184328342	+	primary.p53+p63RE	10.5593	GTGCATGTCTTTGCATGCA
chr5	36526520	36527105	19	chr5	36526749	36526768	+	primary.p53+p63RE	11.0688	AGACAAGCCTGGGCAGGCA
chr5	37847765	37848439	19	chr5	37848064	37848083	+	primary.p53+p63RE	12.4628	GAACATGCCTGGGCTAGCC
chr5	49661332	49661880	19	-	-	-		Other	0	-
chr5	68033037	68033452	19	chr5	68033205	68033224	-	primary.p53+p63RE	9.83272	GCAAGTGTTGACTTGTTTA
chr5	112479288	112480032	19	chr5	112479604	112479623	-	primary.p53+p63RE	10.1028	ACAGGACCAGGCTTGTCTG
chr5	113145741	113146240	19	chr5	113145920	113145944	+	primary.unique-p63RE	8.44287	TGAACAAGAGGCAACATGAAGCCT
chr5	113161686	113162129	19	chr5	113161932	113161951	+	primary.p53+p63RE	10.6689	AGGCAGGCCCTGGCTTGTC
chr5	126368216	126368910	19	chr5	126368520	126368539	+	primary.p53+p63RE	9.23901	GGGCAAGCCCCAGCTGGCT
chr5	134110409	134110919	19	chr5	134110659	134110678	+	primary.p53+p63RE	9.25687	GGGCAAGCCCCAACAGGAT
chr5	138504750	138505449	19	chr5	138505202	138505221	-	primary.p53+p63RE	9.21524	ACCAGCACAGGCATGTTCG
chr5	140237017	140237762	19	chr5	140237426	140237450	-	primary.unique-p63RE	9.08119	GGTGACAGGCCAGGACCTGCCTCT
chr5	140557253	140557907	19	chr5	140557508	140557532	+	primary.unique-p63RE	8.637	CGGGCCAGTTGAGACACGTCCAGG
chr5	141716083	141716453	19	chr5	141716263	141716287	+	primary.unique-p63RE	9.46065	GAGGCAGGCCACAGCTTGCCTGGG
chr5	141935485	141936064	19	chr5	141935721	141935740	+	primary.p53+p63RE	11.5819	GGGCAAGACTGGGCATGCT
chr5	143200722	143201192	19	chr5	143200901	143200920	+	primary.p53+p63RE	11.6596	AGGCATGCCCTGGCTGGTC
chr5	150492474	150493071	19	chr5	150492704	150492723	-	primary.p53+p63RE	11.2442	GCCTGTCTGGGCAGGTCCC
chr5	150634968	150635481	19	chr5	150635241	150635265	+	primary.unique-p63RE	8.17268	CATGCGTGCCTGGGCACGCTCTGC
chr5	151572543	151573262	19	chr5	151572828	151572852	-	primary.unique-p63RE	8.68995	CTGGTCGAGTCTAAGCTTGCTGGC
chr5	163437542	163438209	19	chr5	163437927	163437946	-	primary.p53+p63RE	10.4238	ACAAGCCCAGGCTAGTCCG
chr5	167804725	167805288	19	chr5	167804992	167805006	-	senary.unique-p63RE	7.42868	ACGCTACAGCTTGT
chr5	174425260	174425887	19	chr5	174425495	174425514	+	primary.p53+p63RE	10.5426	AGTCATGACAGGACTTGTC
chr5	177389636	177390317	19	chr5	177390038	177390057	+	quartenary.p53+p63RE	8.56368	GATGTGCTTGGTCTTGCAA
chr6	3432352	3432967	19	chr6	3432666	3432685	-	primary.p53+p63RE	9.51032	GCAAGCACAAACATGCTTC
chr6	19537988	19538488	19	chr6	19538149	19538173	-	primary.unique-p63RE	8.96656	GCCGGCTTGTTTCCACTTGCTACA
chr6	21188345	21189017	19	chr6	21188682	21188701	+	primary.p53+p63RE	10.8331	GGGCATGACAGAGCTTGCC
chr6	30810763	30811350	19	chr6	30810978	30810997	+	secondary.unique-p63RE	9.05213	CCGAGCCTGAACTTGCTTA
chr6	35297752	35298592	19	chr6	35298291	35298315	-	primary.unique-p63RE	8.99287	AGAGTCATGCTTGGGCACGCAGTG
chr6	36676053	36676840	19	chr6	36676448	36676467	+	primary.p53+p63RE	13.5091	GAACATGTCCCAACATGTT
chr6	36682339	36683030	19	chr6	36682644	36682663	-	primary.p53+p63RE	10.9552	GCAAGTTGGGACTTGTCCC
chr6	37244629	37245373	19	chr6	37244976	37244995	+	primary.p53+p63RE	12.6673	AGGCTAGCCTAGACATGTT
chr6	44201639	44202395	19	chr6	44202027	44202046	-	primary.p53+p63RE	10.2861	GCCTGTCGCAGCATGCTCT
chr6	45613593	45614100	19	chr6	45613854	45613878	-	primary.unique-p63RE	8.8679	CAGCACATGCTGGTTCTTGTTCAC
chr6	46821481	46821961	19	chr6	46821746	46821765	-	primary.p53+p63RE	9.89083	TCAAGTGCAGACTTGCTCA
chr6	48110932	48111587	19	chr6	48111199	48111218	-	primary.p53+p63RE	12.8892	GCAAGTCTGGGCAAGCCTC
chr6	54846258	54846813	19	chr6	54846453	54846472	+	secondary.unique-p63RE	9.08106	GGGTGTCGGGACTTGTAAT
chr6	63573228	63574180	19	chr6	63573714	63573733	-	primary.p53+p63RE	11.1728	ACAAGTCTAGTCTTGTCCT
chr6	63598455	63599116	19	chr6	63598784	63598808	-	primary.unique-p63RE	8.937	CAGGACAAGCTGGGACTCGCAGCA
chr6	69894573	69895047	19	chr6	69894760	69894784	-	primary.unique-p63RE	9.3656	TAAAACAAGATGAGGCTTGCAGCA
chr6	79544971	79545432	19	chr6	79545249	79545268	-	primary.p53+p63RE	12.394	GCCTGTTTGGGCATGCTTG
chr6	90175786	90176413	19	chr6	90176095	90176119	+	primary.unique-p63RE	8.84705	GTAGCATGTGGTGACACGCCTCTA
chr6	104625423	104626038	19	chr6	104625750	104625774	-	primary.unique-p63RE	7.83639	AGGAACGAGCTGAGGCAAGCACTC
chr6	105372636	105373671	19	chr6	105373011	105373030	-	primary.p53+p63RE	11.6652	GCAAGCCCAGGCTAGTCTG
chr6	110098504	110099022	19	chr6	110098696	110098715	-	primary.p53+p63RE	9.37263	CCTTGTCCAGGCTTGCTTA
chr6	111483836	111484404	19	chr6	111484139	111484158	+	primary.p53+p63RE	11.5538	GTACATGTAAGGACTTGTC
chr6	137813167	137813945	19	chr6	137813524	137813543	-	primary.p53+p63RE	10.8479	GCAGGTTTAGGCATGTTCT
chr6	150272412	150273028	19	chr6	150272724	150272748	-	primary.unique-p63RE	7.73164	CCAGGCGGGTTCAGGCACGTTCCT
chr6	158737654	158738307	19	chr6	158737948	158737967	+	primary.p53+p63RE	9.36019	GGGCATGACTCAACCTGCC
chr6	169224146	169224626	19	chr6	169224331	169224350	+	primary.p53+p63RE	11.2015	GAGCAAGCCCCTGCATGCC
chr7	2169913	2170653	19	chr7	2170135	2170154	-	primary.p53+p63RE	11.7692	GCATGCCAGGGCTTGTCCC
chr7	4189023	4189596	19	chr7	4189407	4189426	+	primary.p53+p63RE	9.3492	AAGCGAGCCAGGACTTGCC
chr7	4683083	4684175	19	chr7	4683453	4683477	-	primary.unique-p63RE	8.23231	CCCCACAAGCCTGGGCTCGCAGGG
chr7	7100152	7100853	19	chr7	7100577	7100601	+	primary.unique-p63RE	9.89919	ACAGCAGGCCTCAGCTTGCCTTGT
chr7	23235811	23236368	19	chr7	23236139	23236158	+	primary.p53+p63RE	9.8195	GAGCATGCCCTGGCAGGTG
chr7	30301714	30302198	19	chr7	30301896	30301915	+	primary.p53+p63RE	9.25101	GAGCATGCTGCTGCTTGTT
chr7	30406865	30407598	19	chr7	30407151	30407175	-	primary.unique-p63RE	8.30808	GGGCTCTTGCCCCTACTTGTTCAT
chr7	40717168	40717755	19	chr7	40717492	40717511	-	primary.p53+p63RE	13.9984	GCATGCCCAGACAAGCCCT
chr7	40843492	40844308	19	chr7	40843824	40843843	+	primary.p53+p63RE	12.404	TGACATGACTGGACTTGTT
chr7	42198284	42198812	19	chr7	42198531	42198555	+	primary.unique-p63RE	8.28706	CTCACAGGCCAGGACAAGTTCTGT
chr7	44797187	44797931	19	chr7	44797576	44797600	+	primary.unique-p63RE	9.14404	CAAGCAAGTTGCGACTGGCCACAA
chr7	48636265	48636954	19	chr7	48636579	48636598	-	primary.p53+p63RE	9.98078	TCCTGCCTGGGCATGTGCT
chr7	50378906	50379569	19	chr7	50379269	50379293	-	primary.unique-p63RE	9.84973	CTGGACAGGCTAGGACTTGCACTG
chr7	66359609	66360201	19	chr7	66359794	66359813	+	primary.p53+p63RE	9.93048	TGGCTTGTCTAGGCCTGTA
chr7	73838364	73838983	19	chr7	73838780	73838799	-	primary.p53+p63RE	9.39991	GCCTGCCCAGACCTGCCCA
chr7	74312603	74313065	19	chr7	74312880	74312899	+	secondary.unique-p63RE	9.69524	ATGTGCCAGGACAGGTAGT
chr7	74542330	74542959	19	chr7	74542646	74542665	+	primary.p53+p63RE	11.3634	GGGCATGACCAGACTTGAC
chr7	91557025	91557750	19	chr7	91557532	91557551	-	primary.p53+p63RE	10.5623	ACAAGCCTAGGCCTGCCCC
chr7	99254284	99254836	19	chr7	99254623	99254647	+	primary.unique-p63RE	10.543	TGTGCAGGCACCAACATGCTCAAC
chr7	110534539	110535073	19	chr7	110534713	110534732	+	primary.p53+p63RE	11.4805	GCACAAGCCCGGGCTTGTC
chr7	119733357	119734070	19	chr7	119733739	119733758	+	primary.p53+p63RE	11.4517	GAGCAAGCCTGGACTAGCC
chr7	130373686	130374303	19	chr7	130374077	130374091	-	secondary.p53+p63RE	8.00689	GGCATGTTGGGACA
chr7	148784075	148784666	19	chr7	148784351	148784370	-	primary.p53+p63RE	9.43612	ACAAGATCGGGCACGTTCA
chr7	157293221	157293907	19	chr7	157293669	157293688	+	primary.p53+p63RE	10.1566	AAACAAGCCAGGTCTTGCC
chr8	8625701	8626241	19	chr8	8625955	8625974	-	primary.p53+p63RE	11.3746	ACAAGCCTGGGCTAGCCTG
chr8	10710906	10711608	19	chr8	10711294	10711318	+	primary.unique-p63RE	7.89712	TGAGCAAGACGGCACACGTCAGAG
chr8	19096286	19096673	19	chr8	19096502	19096526	-	primary.unique-p63RE	10.2206	CAGGGCAGGCTGGGGCATGCAGAC
chr8	29770219	29770870	19	chr8	29770627	29770646	-	primary.p53+p63RE	14.2554	ACATGTTGGGACATGCCAG
chr8	41156148	41156801	19	chr8	41156414	41156433	+	primary.p53+p63RE	11.1489	AAACAAGCCTATACTTGTT
chr8	48696188	48696734	19	chr8	48696491	48696515	+	primary.unique-p63RE	8.92582	GCAACAGGCCCAGACTCGCCTGTG
chr8	48703982	48704802	19	chr8	48704463	48704487	+	primary.unique-p63RE	9.22851	GGTGCAGGCCCTGGCCTGCTCCAC
chr8	53944949	53946175	19	chr8	53945761	53945780	-	primary.p53+p63RE	9.49839	GCGTGTTGGCACATGCCTG
chr8	65948511	65948962	19	chr8	65948703	65948722	+	primary.p53+p63RE	10.2247	TGGCCTGTCTCGGCTTGTA
chr8	94657120	94657854	19	chr8	94657618	94657637	-	primary.p53+p63RE	10.3884	ACATGTTGGGACGTGTTAT
chr8	95772917	95773649	19	chr8	95773248	95773267	+	primary.p53+p63RE	11.888	GGGCTTGCCTGGGCTTGAC
chr8	97755418	97755869	19	chr8	97755595	97755619	+	primary.unique-p63RE	8.81169	GTTGCAGGTTGTGGCATGAAAAGG
chr8	129848671	129849045	19	chr8	129848846	129848870	+	primary.unique-p63RE	8.58236	CAGGCATGAGCCAGCACGCCCAGC
chr8	141041205	141041881	19	chr8	141041576	141041595	+	primary.p53+p63RE	10.5178	GAGCATGTCAGGGCATGAG
chr8	142815443	142816444	19	chr8	142815832	142815851	-	primary.p53+p63RE	12.7932	GCTTGCCCAGGCATGTCCA
chr8	143738314	143739055	19	chr8	143738654	143738678	-	primary.unique-p63RE	8.42649	ACGGGCGTGCCTGGTCCTGCCCTG
chr9	33418081	33418561	19	chr9	33418316	33418335	-	primary.p53+p63RE	10.6639	ACCTGTCCAGACTTGCCTT
chr9	35905736	35906374	19	chr9	35906132	35906151	-	primary.p53+p63RE	9.97714	GCAAGTCCAAACAGGCTTC
chr9	36336997	36337493	19	chr9	36337204	36337223	+	primary.p53+p63RE	10.3716	TGGCAAGCCTGAGCTGGTC
chr9	77981314	77981706	19	chr9	77981494	77981508	-	secondary.p53+p63RE	7.96947	GGCAAGTCAGAGCA
chr9	82021198	82021716	19	chr9	82021413	82021432	-	primary.p53+p63RE	12.4628	GCTAGCCCAGGCATGTTCT
chr9	84137761	84138310	19	chr9	84138057	84138076	-	primary.p53+p63RE	10.0923	GCAGGTCCTGACTTGCTCT
chr9	84851900	84852498	19	chr9	84852064	84852083	-	primary.p53+p63RE	11.5842	ACAGGTCTGGGCAAGTCAG
chr9	87763228	87763778	19	chr9	87763456	87763470	-	secondary.p53+p63RE	8.27083	AACAAGGCTGGACT
chr9	89686146	89686776	19	chr9	89686402	89686416	-	secondary.p53+p63RE	9.0463	AACATGCCCAGGCA
chr9	90970494	90971158	19	chr9	90970834	90970858	-	primary.unique-p63RE	9.14557	AAGGACTTGCTGCAGCCTGCTCCT
chr9	97089348	97089822	19	chr9	97089552	97089576	+	primary.unique-p63RE	8.50594	AGCACAGGCAGCAACTTGCTCTGA
chr9	109537095	109537913	19	chr9	109537465	109537489	-	primary.unique-p63RE	9.69241	GTGGGCAGGTCGAGTCTTGTCCAT
chr9	114472771	114473306	19	chr9	114473044	114473068	+	primary.unique-p63RE	9.26987	AGGGCAGGTCCCATCTTGTTTCTG
chr9	114908037	114908933	19	chr9	114908549	114908568	-	primary.p53+p63RE	11.7181	GCAAGCCCAGGCTTGCCTC
chr9	121398110	121398847	19	chr9	121398366	121398390	-	primary.unique-p63RE	9.47699	ATGGGCAAGTTATGTCATGTAATT
chr9	121700151	121701018	19	chr9	121700422	121700441	-	primary.p53+p63RE	9.24142	GCCAGTTAGAACATGTCCC
chr9	126793696	126794440	19	chr9	126794125	126794144	-	primary.p53+p63RE	11.6761	ACATGTGCACACATGTCCC
chr9	127361293	127362039	19	chr9	127361673	127361697	-	primary.unique-p63RE	7.89688	TGAAGCCTGCCACCACCTGTCCTG
chr9	127566163	127566806	19	chr9	127566444	127566463	+	primary.p53+p63RE	10.4628	AAACAAGCCTCTGCTTGCC
chr9	128328615	128329359	19	chr9	128329151	128329170	-	primary.p53+p63RE	9.47611	ACAAGCCTGGACAAATCCT
chr9	128902232	128902973	19	chr9	128902597	128902621	+	primary.unique-p63RE	9.47357	CAGGCAGGCTGCTGCATGCACCGG
chr9	129102567	129103627	19	chr9	129102963	129102987	+	primary.unique-p63RE	8.91302	TAAGCAGGCCTGGGCAGGTGTGGG
chr9	129278231	129279068	19	chr9	129278595	129278619	-	primary.unique-p63RE	9.33546	CCCTGCCTGCCTGGGCCTGCACCT
chr9	129331925	129332635	19	chr9	129332344	129332368	-	primary.unique-p63RE	8.81385	CCTGTCCTGTTGGGGCATGATTTT
chr9	130426893	130427380	19	chr9	130427149	130427173	+	primary.unique-p63RE	8.04201	CCAACAGGCCTGGGCAGGAAATGG
chr9	131714067	131714439	19	chr9	131714240	131714264	+	primary.unique-p63RE	8.2047	AGTGCCTGTCCCTACACGCAAGAC
chr9	133881153	133881517	19	chr9	133881311	133881330	+	primary.p53+p63RE	9.2315	GAATGTGTCTGGACTTGCC
chr9	133944505	133945140	19	chr9	133944878	133944902	+	primary.unique-p63RE	8.77691	CGGGCAAGTCTCCTCATGTGCACA
chr9	134379758	134380700	19	chr9	134380149	134380168	-	primary.p53+p63RE	9.64607	GCAAGTCAGGGCAGGTGCG
chr9	136108354	136109045	19	chr9	136108542	136108561	-	primary.p53+p63RE	9.36219	ACAGGCCCAGGCCTGTCCC
chr9	136109266	136110220	19	chr9	136109823	136109842	+	primary.p53+p63RE	11.4752	CGGCATGCCCGGGCACGCT
chr9	136296804	136297389	19	chr9	136297090	136297109	-	primary.p53+p63RE	9.9476	GCATGTGCACACATGCCAG
chrKI270438.1	111991	112505	19	-	-	-		Other	0	-
chrMT	0	1036	19	-	-	-		Other	0	-
chrX	2710489	2710862	19	chrX	2710671	2710690	+	primary.p53+p63RE	11.7738	-
chrX	3362965	3363374	19	chrX	3363135	3363159	+	primary.unique-p63RE	9.40759	-
chrX	17547664	17548287	19	chrX	17547930	17547949	-	primary.p53+p63RE	11.7238	-
chrX	121823332	121823981	19	chrX	121823621	121823640	-	primary.p53+p63RE	10.6869	-
chrX	134684812	134685476	19	chrX	134685134	134685153	+	primary.p53+p63RE	10.0797	-
chr1	633873	634176	18	-	-	-		Other	0	-
chr1	1250730	1251298	18	chr1	1251047	1251066	+	primary.p53+p63RE	10.3227	AGGCAGGCCTGGGCATGCG
chr1	2428362	2428851	18	chr1	2428449	2428463	-	secondary.p53+p63RE	8.29717	GGCAAGCGTGGACT
chr1	3680961	3681527	18	chr1	3681226	3681245	-	primary.p53+p63RE	10.045	GCAGGTCCAGGCCTGCCTG
chr1	3857304	3857773	18	chr1	3857476	3857500	-	primary.unique-p63RE	8.86412	CCCGGCCTGTGCCAGCTTGCAGAG
chr1	6367372	6368056	18	chr1	6367774	6367793	-	primary.p53+p63RE	9.90017	GCAAGAAGGGGCATGTTTC
chr1	10083145	10083540	18	chr1	10083311	10083330	+	primary.p53+p63RE	10.0452	GGGCAAGAATGGACTTGCC
chr1	11025974	11026437	18	chr1	11026240	11026259	+	primary.p53+p63RE	11.5795	GAACATGCCTGGTCTTGCT
chr1	12232291	12232634	18	chr1	12232453	12232477	+	primary.unique-p63RE	7.86036	GATGCGTGCCATGGCAAGTCTGTA
chr1	14190503	14190864	18	chr1	14190677	14190696	+	primary.p53+p63RE	10.091	GAACAAGCCTGAGCTAGCT
chr1	16300403	16300884	18	chr1	16300674	16300698	-	primary.unique-p63RE	8.08172	GTTATCCAGTCTGGGCCTGCTGGC
chr1	16396492	16397133	18	chr1	16396774	16396793	+	primary.p53+p63RE	9.40148	AGCCATGCCCCAACACGTC
chr1	21974765	21975151	18	chr1	21974895	21974909	-	secondary.p53+p63RE	9.8411	AACATGTCCGGGCA
chr1	22137336	22137825	18	chr1	22137577	22137601	+	primary.unique-p63RE	8.45135	TGGGCGAGTTTCAACAGGTTTGGG
chr1	24317018	24317384	18	chr1	24317199	24317213	+	tertiary.unique-p63RE	8.12889	GAGCACAGACACGC
chr1	27247314	27247783	18	chr1	27247556	27247575	+	primary.p53+p63RE	10.9961	TTACAAGTTAGAACATGCC
chr1	27522231	27522900	18	chr1	27522538	27522562	-	primary.unique-p63RE	9.38785	TGCTACAGGTTTGCACTTGTTTCT
chr1	28241836	28242242	18	chr1	28242033	28242052	-	primary.p53+p63RE	13.0122	GCATGTCTATGCATGCCTA
chr1	29191057	29191794	18	chr1	29191446	29191465	-	primary.p53+p63RE	10.0567	GCATGTACCAGCACGCCTG
chr1	29709598	29710254	18	chr1	29709990	29710009	+	primary.p53+p63RE	11.0017	TTGCTTGCCCCAGCATGCC
chr1	30748027	30748552	18	chr1	30748278	30748297	+	primary.p53+p63RE	11.8318	AGACAGGCCCGGGCTTGTC
chr1	33220971	33221515	18	chr1	33221255	33221279	+	primary.unique-p63RE	7.72196	GGTACGGGCCAGGACCTGTCCTGA
chr1	41006776	41007639	18	chr1	41007454	41007468	-	secondary.p53+p63RE	8.5093	GACATGCCAGAACA
chr1	43666508	43667208	18	chr1	43666929	43666953	-	primary.unique-p63RE	8.23329	TGCTTCAAGTCTGCTCTTGTTCAG
chr1	45557389	45557906	18	chr1	45557695	45557714	-	primary.p53+p63RE	12.0888	TCAAGTCCAGACTTGCTTG
chr1	46218419	46219022	18	chr1	46218652	46218671	-	primary.p53+p63RE	9.5015	ACAGGTTCAGACTTGTGCT
chr1	50603497	50604093	18	chr1	50603737	50603756	+	primary.p53+p63RE	10.2967	GCACTTGTCTGGACTAGCC
chr1	50705639	50706181	18	chr1	50705930	50705949	-	primary.p53+p63RE	10.1293	ACAAGTTCTAGCTTGCTTT
chr1	55320885	55321258	18	chr1	55321058	55321077	+	primary.p53+p63RE	9.48476	GAACGTGACTGGACTTGCT
chr1	59122965	59123647	18	chr1	59123239	59123258	+	primary.p53+p63RE	10.997	ACACATGACTGGACTTGTT
chr1	84750111	84750650	18	chr1	84750465	84750479	+	tertiary.unique-p63RE	7.96144	GTGTGCACACACGC
chr1	93597679	93598246	18	chr1	93597981	93598000	-	primary.p53+p63RE	9.44089	GCAAGTCCAGTCTTGACAG
chr1	109263161	109263802	18	chr1	109263438	109263452	-	secondary.p53+p63RE	9.30776	GGCAGGCCTGGGCA
chr1	110476980	110477679	18	chr1	110477263	110477287	+	primary.unique-p63RE	8.50052	GTATCAAGTGCTGGCATGTGTTTG
chr1	112061077	112061454	18	chr1	112061259	112061278	+	primary.p53+p63RE	10.4905	CGGCATGCCTGGGCAAGAA
chr1	114802819	114803465	18	chr1	114803270	114803289	+	primary.p53+p63RE	10.8401	AGGCTAGCCCCGGCTTGTT
chr1	116693756	116694328	18	chr1	116694006	116694030	-	primary.unique-p63RE	8.88815	CCTCTCCTGCCTAGACATGCAGCT
chr1	116878958	116879785	18	chr1	116879308	116879327	+	primary.p53+p63RE	12.5586	GGACAGGTCTGGACTTGTC
chr1	143244860	143245203	18	-	-	-		Other	0	-
chr1	143246821	143247202	18	-	-	-		Other	0	-
chr1	150624078	150624802	18	chr1	150624441	150624460	+	primary.p53+p63RE	11.4421	GTGCATGACTGAGCATGTT
chr1	151058478	151059218	18	chr1	151058850	151058874	+	primary.unique-p63RE	8.8068	CTGACAAGCCCTCACATGAAGCAG
chr1	151713673	151714241	18	chr1	151714028	151714047	-	primary.p53+p63RE	10.7259	ACCTGCCCAGGCCTGCCCA
chr1	152023928	152024635	18	chr1	152024313	152024332	-	primary.p53+p63RE	9.49268	GCCAGTGCAGACTTGCCTC
chr1	153525961	153526620	18	chr1	153526313	153526332	-	primary.p53+p63RE	11.389	ACATGTTTAGGCAAGCCCC
chr1	153615222	153616025	18	chr1	153615612	153615631	+	primary.p53+p63RE	9.23309	GAGCAGGTCCCAGCATGCA
chr1	154320821	154321204	18	chr1	154321006	154321020	+	tertiary.unique-p63RE	9.03127	GTGCACAGACACGT
chr1	154418191	154418896	18	chr1	154418451	154418475	+	primary.unique-p63RE	8.22442	AATACAAGCAGGTACAAGAAGTAC
chr1	159009585	159010382	18	chr1	159009932	159009956	+	primary.unique-p63RE	8.11355	GGAGCAAGCCAGCACTAGTCAGCT
chr1	160767642	160768253	18	chr1	160767885	160767909	+	primary.unique-p63RE	9.96281	CTTGCATGCTGGGACCTGTGCATC
chr1	165903549	165904157	18	chr1	165903899	165903923	+	primary.unique-p63RE	9.06588	AAGACAGGAAGGGGCATGTTGAGG
chr1	168112826	168113365	18	chr1	168113027	168113046	-	secondary.unique-p63RE	9.29888	GCACAAGCCCCAGCAAATC
chr1	169115857	169116374	18	chr1	169116029	169116053	+	primary.unique-p63RE	8.67705	TGAGCAGGCACAGGCACGCACACC
chr1	172138505	172139069	18	chr1	172138858	172138882	+	primary.unique-p63RE	9.07708	ACAGCAAGTGTAGACAGGCAGACA
chr1	179038844	179039485	18	chr1	179039216	179039235	+	primary.p53+p63RE	11.8774	GAGCAAGCCTGTGCATGTT
chr1	181044527	181045049	18	chr1	181044785	181044809	+	primary.unique-p63RE	8.63855	AGGACAAGCTCAGACAAGAGGCAG
chr1	181768130	181768850	18	chr1	181768346	181768365	+	primary.p53+p63RE	11.8869	GAGCATGTCCAGGCAAGAC
chr1	182643569	182644216	18	chr1	182643902	182643921	+	primary.p53+p63RE	13.5915	AGACTTGCCTGGACTTGCC
chr1	185412536	185413090	18	chr1	185412893	185412912	+	primary.p53+p63RE	9.31261	TGTCATGCTGGCACTTGTC
chr1	200894690	200895095	18	chr1	200894866	200894880	+	tertiary.unique-p63RE	7.62631	AAGTCATAACAAGT
chr1	201397018	201397543	18	chr1	201397486	201397510	-	primary.unique-p63RE	8.04748	GTGGACAAGCTTAGGCCAGACCTT
chr1	201468610	201469546	18	chr1	201469158	201469177	+	secondary.unique-p63RE	10.2539	ATGTGCCCTTACATGTTCC
chr1	202229260	202229661	18	chr1	202229463	202229487	+	primary.unique-p63RE	9.28226	GTGGCAGGCTCAGACCTGCAGCCC
chr1	203306433	203306877	18	chr1	203306682	203306701	+	primary.p53+p63RE	10.849	GGCCCTGCCTGGACATGCC
chr1	205258723	205259471	18	chr1	205259059	205259083	-	primary.unique-p63RE	9.30278	CTGCACAGGCCTGGGCCTGCTTGT
chr1	205284382	205285146	18	chr1	205284768	205284792	+	primary.unique-p63RE	7.90849	AAAACCTGCCCTCACAGGCCCAGC
chr1	205983736	205984389	18	chr1	205984077	205984101	+	primary.unique-p63RE	7.96002	ACAGCAAGAGCAGGCACGCCTGTG
chr1	207707188	207707928	18	chr1	207707486	207707505	-	primary.p53+p63RE	12.6763	GCATGTTGGTGCATGCCTG
chr1	214573870	214574417	18	chr1	214574152	214574176	+	primary.unique-p63RE	9.46281	CCAGCATGAGCCAACATGTTACAG
chr1	218600838	218601577	18	chr1	218601192	218601211	+	primary.p53+p63RE	13.078	GGACAAGTCTGAACTTGCC
chr1	220515885	220517063	18	chr1	220516184	220516203	-	primary.p53+p63RE	9.22734	GCATGCTCATTCTTGTTTC
chr1	225449348	225449907	18	chr1	225449527	225449551	-	primary.unique-p63RE	8.87788	CCCTTCTTGCCCAGACCTGCCTCT
chr1	227885739	227886311	18	chr1	227885947	227885971	+	primary.unique-p63RE	8.1681	GAGGCAGGCCCAGTCTAGCCTGTG
chr1	228013236	228013857	18	chr1	228013485	228013509	+	primary.unique-p63RE	8.43459	TGTGCCTGCTGGGACTCGTTCAAA
chr1	228486528	228487299	18	chr1	228486779	228486803	+	primary.unique-p63RE	8.46704	CGGGCAGGCCCGTGCACGCAGGGC
chr1	229225348	229225862	18	chr1	229225618	229225642	-	primary.unique-p63RE	9.84642	CAGGGCATGCTGCAGCCTGTCGGG
chr1	229231187	229231759	18	chr1	229231514	229231533	+	primary.p53+p63RE	9.91976	GGACGTGCCCTAACTTGCT
chr1	235067604	235068616	18	chr1	235068225	235068244	+	primary.p53+p63RE	10.7474	ATACTTGTCAGAACAAGCC
chr1	235917535	235917953	18	chr1	235917800	235917824	-	primary.unique-p63RE	8.66502	GGAAGCAGGTCAGGACTTGAGGCT
chr1	235960636	235961276	18	chr1	235960980	235961004	+	primary.unique-p63RE	8.43534	ATGGCAGGCCCAGACTCGCTCTCA
chr1	236083677	236084402	18	chr1	236083978	236083997	+	primary.p53+p63RE	9.55058	TGATAAGCCTGGGCATGTG
chr10	5618001	5618445	18	chr10	5618262	5618281	-	primary.p53+p63RE	9.4791	GCAAGCCCAGGCAGGGCTC
chr10	8975553	8976085	18	chr10	8975711	8975735	+	primary.unique-p63RE	8.87327	GTAGCAGGACTGGGCTTGTTTGCA
chr10	27500804	27501428	18	chr10	27501104	27501128	-	primary.unique-p63RE	9.10384	GTGCTCATGTTGGTACCTGTTCAC
chr10	29479125	29479438	18	chr10	29479275	29479299	+	primary.unique-p63RE	9.44045	GAGGCAGGTCTGGACTTGAGTGTC
chr10	29951690	29952139	18	chr10	29951880	29951904	+	primary.unique-p63RE	8.46138	CGCACAGGTGCGGACAAGTCCAGG
chr10	33927301	33927813	18	chr10	33927542	33927566	+	primary.unique-p63RE	8.22488	GCCGCATGACTTAACACGTCCTTC
chr10	34905868	34906335	18	chr10	34906144	34906168	-	primary.unique-p63RE	8.63058	GAGCACTTGCCCAGGCCTGCATCC
chr10	34988585	34989349	18	chr10	34988847	34988866	+	primary.p53+p63RE	10.3131	GAGCCTGCTCAGGCTTGCC
chr10	35887646	35888061	18	chr10	35887876	35887895	+	primary.p53+p63RE	12.5044	TGGCATGCCCCAGCTTGCC
chr10	45514236	45514778	18	chr10	45514492	45514511	+	primary.p53+p63RE	9.39906	GGACTTGTGAGGGCTTGCT
chr10	48417364	48417829	18	chr10	48417544	48417563	-	primary.p53+p63RE	11.7653	TCAAGTTCAGGCTTGTCCC
chr10	50325422	50325892	18	chr10	50325620	50325644	-	primary.unique-p63RE	8.08268	CTCACCAAGTATGGGCTTGCCAGC
chr10	52864413	52865069	18	chr10	52864642	52864666	-	primary.unique-p63RE	9.25039	CAAGGCCTGCAACAACATGCTCCT
chr10	59337217	59337594	18	chr10	59337398	59337417	+	primary.p53+p63RE	12.2204	TGACTTGCCTGGGCATGTG
chr10	69385308	69385795	18	chr10	69385549	69385573	+	primary.unique-p63RE	8.73041	GAGGCAAGACCCAGCCTGTCACGC
chr10	71246765	71247439	18	chr10	71246981	71247005	-	primary.unique-p63RE	8.06634	CAGGACCTGTCTGATCACGCCCCT
chr10	71300839	71301579	18	chr10	71301130	71301149	+	primary.p53+p63RE	12.006	GGGCATGCCCCAGCAGGTC
chr10	71333086	71333805	18	chr10	71333656	71333680	-	primary.unique-p63RE	7.99136	AGAAGCCTGCCCGGTCAGGCAAGA
chr10	72889201	72889834	18	chr10	72889465	72889489	-	primary.unique-p63RE	9.20106	ACAAACGTGTACACACATGTTCAT
chr10	80471016	80471496	18	chr10	80471227	80471246	-	primary.p53+p63RE	11.3699	ACATGTAGAAACAAGTCTT
chr10	83983498	83984055	18	chr10	83983812	83983831	-	primary.p53+p63RE	11.6187	GCAAGCTCAGGCAGGTCCA
chr10	85548085	85548543	18	chr10	85548307	85548326	+	primary.p53+p63RE	9.66769	AGGCAAGTTGAAACTTGTA
chr10	86958689	86959372	18	chr10	86959052	86959076	-	primary.unique-p63RE	8.13874	GGCTACCTGTCTGTGCACGCACAC
chr10	88990975	88991540	18	chr10	88991310	88991329	-	primary.p53+p63RE	12.0644	ACAAGCCCTGACAAGCCAA
chr10	93445449	93445970	18	chr10	93445770	93445794	-	primary.unique-p63RE	7.92811	GGGCTCATGTTTGCACAGGCCATC
chr10	93465916	93466639	18	chr10	93466279	93466303	+	primary.unique-p63RE	8.25769	TGGGCAAGTGGCAACAGGATACAA
chr10	97412839	97413326	18	chr10	97413072	97413096	+	primary.unique-p63RE	8.21297	GGGGCAAGTAAGAACACGATGTGT
chr10	99621243	99621858	18	chr10	99621660	99621684	-	primary.unique-p63RE	7.95197	CCGAGCGTGTTGGCACAAGCTGCC
chr10	100656410	100656782	18	chr10	100656568	100656587	+	primary.p53+p63RE	11.6173	AAGCATGTTCCAACAAGTC
chr10	101558178	101558659	18	chr10	101558385	101558404	-	primary.p53+p63RE	11.2222	GCCTGCCCTGGCAAGTCTC
chr10	103676055	103676553	18	chr10	103676227	103676251	+	primary.unique-p63RE	9.17448	GCAGCAAGAAAGGACTTGCCTCAT
chr10	103900189	103900702	18	chr10	103900461	103900480	+	primary.p53+p63RE	10.4858	GGGCAAGTTCCGACAGGCT
chr10	103941759	103942399	18	chr10	103942029	103942048	+	primary.p53+p63RE	10.123	TAGCAAGTCTGTACAGGCT
chr10	113099299	113099796	18	chr10	113099486	113099510	+	primary.unique-p63RE	10.282	GGAACAAGCTGCTACATGCACGGG
chr10	120965699	120966134	18	chr10	120965896	120965920	+	primary.unique-p63RE	9.11934	AATTCATGCTGCAACAAGTTACAT
chr10	121313084	121313458	18	chr10	121313248	121313272	+	primary.unique-p63RE	9.03873	CACTCATGCCCCAACTTGACTCGG
chr10	124021366	124021836	18	chr10	124021619	124021638	+	primary.p53+p63RE	11.5888	AGACATGTCTATACTGGCC
chr10	124524851	124525394	18	chr10	124525006	124525030	-	primary.unique-p63RE	9.64139	ATTGACATGCCCAGTCCTGCAGAG
chr10	131094535	131095107	18	chr10	131094825	131094844	+	primary.p53+p63RE	13.1675	AGACTTGCCTGGGCTTGTT
chr11	2803388	2804002	18	chr11	2803691	2803710	-	primary.p53+p63RE	12.0404	GCCTGCCCAGACTTGCCAG
chr11	9609874	9610414	18	chr11	9610140	9610159	+	primary.p53+p63RE	11.8649	AGGCATGTCCCAACACGCC
chr11	13140847	13141324	18	chr11	13141092	13141111	-	primary.p53+p63RE	10.567	ACCTGCCTGGGCCTGCCTG
chr11	27040159	27040644	18	chr11	27040351	27040375	+	primary.unique-p63RE	8.64105	CGGGCAAGAAGCAACAAGTTGCAG
chr11	33045833	33046261	18	chr11	33046193	33046207	+	secondary.p53+p63RE	8.16642	CCCTGGACATGTTC
chr11	34685212	34685866	18	chr11	34685591	34685610	-	primary.p53+p63RE	12.0207	TCATGTCCACACATGTCAA
chr11	35276301	35276741	18	chr11	35276526	35276550	+	primary.unique-p63RE	8.99895	TTTGCAAGTGTAAGCATGTGAGCA
chr11	44564463	44565293	18	chr11	44564762	44564781	-	primary.p53+p63RE	10.3938	GCCAGTCCAGGCAAGCTGG
chr11	56932728	56933240	18	chr11	56933044	56933063	-	quinary.unique-p63RE	10.1295	TCTCTTGTTGCAACAAGTA
chr11	61973430	61973908	18	chr11	61973665	61973689	+	primary.unique-p63RE	7.78679	CTTGCAAGTCTGGGCAGGGACCTC
chr11	65121907	65122635	18	chr11	65122263	65122282	+	primary.p53+p63RE	9.951	GAACCTGCCTGGGCAGGCA
chr11	66336490	66337356	18	chr11	66337058	66337077	-	primary.p53+p63RE	9.54001	ACAGGTGCAGACATGACCC
chr11	66767690	66768571	18	chr11	66768180	66768199	-	primary.p53+p63RE	11.4674	ACAGGTCCAGACTTGCTCA
chr11	68818059	68818553	18	chr11	68818345	68818364	+	primary.p53+p63RE	10.0566	ATTCATGCCTGGACCTGCC
chr11	69377568	69378043	18	chr11	69377810	69377829	+	primary.p53+p63RE	9.62128	GGGCGAGCCGGGACAAGTC
chr11	72058570	72059205	18	chr11	72058910	72058929	-	primary.p53+p63RE	10.4705	GCAAGTGCAGACAGGCCCA
chr11	76784382	76785031	18	chr11	76784705	76784724	+	primary.p53+p63RE	9.73555	GGATAAGTCTAGACTTGCA
chr11	79168512	79169283	18	chr11	79168894	79168913	-	primary.p53+p63RE	11.3163	ACAAGCCCAGGCTAGTTTA
chr11	82747373	82747834	18	chr11	82747552	82747576	+	primary.unique-p63RE	8.48749	CAGGCATGTGCCATCACGCCTGGC
chr11	92852901	92853466	18	chr11	92853160	92853184	+	primary.unique-p63RE	9.3408	CAGGCATGCTGGCACATGAGCAAG
chr11	101721184	101721861	18	chr11	101721500	101721524	+	primary.unique-p63RE	9.04462	CAGGCAGGCAGGCACATGTTCGCT
chr11	111426443	111427047	18	chr11	111426781	111426800	+	primary.p53+p63RE	10.3782	AGGCAGGCCCGGGCAGGTT
chr11	112614496	112615194	18	chr11	112614794	112614818	-	primary.unique-p63RE	8.5408	CTGAACAAGACCAGTCCTGTTTAT
chr11	118691951	118692735	18	chr11	118692124	118692138	-	secondary.p53+p63RE	7.80796	GGCAGGCCCGAACT
chr11	119696316	119696988	18	chr11	119696552	119696571	-	primary.p53+p63RE	10.4257	CCCTGTCCTGACATGTCCC
chr11	123616433	123616884	18	chr11	123616684	123616708	-	primary.unique-p63RE	8.20266	AGGCTCTTGCCCCCACATGCCTGC
chr12	3457827	3458416	18	chr12	3457985	3458004	-	primary.p53+p63RE	9.86938	GCATGTGCCATCATGCCCA
chr12	9872599	9873230	18	chr12	9873040	9873054	+	secondary.p53+p63RE	8.42183	GCCAAGGCAAGCCC
chr12	11745951	11746478	18	chr12	11746198	11746217	+	primary.p53+p63RE	9.21115	TTACAAGCTTGAACCTGTC
chr12	14961483	14962013	18	chr12	14961745	14961764	+	primary.p53+p63RE	9.31077	GCACATGTGCGAGCATGAC
chr12	22101632	22102196	18	chr12	22101904	22101923	+	primary.p53+p63RE	11.3377	TAACATGTCTCTACAAGCC
chr12	25135504	25136182	18	chr12	25135874	25135893	+	primary.p53+p63RE	11.4851	AGACATGCCTATACCTGCC
chr12	27580863	27581256	18	chr12	27581033	27581057	-	primary.unique-p63RE	8.33839	ACAGGCGTGTGCCATCATGCCCGG
chr12	28032959	28033630	18	chr12	28033288	28033312	+	primary.unique-p63RE	9.05995	GCAACCTGTCCTAACCTGCTTTAT
chr12	31360587	31361015	18	chr12	31360827	31360841	-	secondary.p53+p63RE	8.42312	GGCAGGTTCAGGCA
chr12	47088215	47089047	18	chr12	47088626	47088645	+	primary.p53+p63RE	10.3375	TGACATGCTGCTACTTGCC
chr12	54207324	54207994	18	chr12	54207614	54207633	+	primary.p53+p63RE	10.2368	GTGCAAGCCTGAACAAGCA
chr12	54285936	54286368	18	chr12	54286135	54286159	+	primary.unique-p63RE	8.74363	GGGGCAGGCCACGGCACGCTCCAT
chr12	54390158	54390964	18	chr12	54390557	54390581	-	primary.unique-p63RE	8.19188	CTCGGCGTGTTGGGGCAGGATGGC
chr12	57888478	57888948	18	chr12	57888689	57888708	+	secondary.unique-p63RE	10.2009	CTTTGTTCCAGCATGTTGT
chr12	64169907	64170441	18	chr12	64170196	64170215	+	primary.p53+p63RE	10.2766	GAACATGTTGGCACATGAC
chr12	68787393	68787910	18	chr12	68787720	68787734	-	secondary.p53+p63RE	9.87905	GGCAAGTCCAGGCA
chr12	75177768	75178360	18	chr12	75178122	75178141	+	primary.p53+p63RE	11.7735	AGGCATGTCCTGGCATGAA
chr12	77065658	77066270	18	chr12	77066066	77066085	+	primary.p53+p63RE	9.31387	GGAGTTGTCCAGACTTGCC
chr12	88865595	88865969	18	chr12	88865772	88865791	-	primary.p53+p63RE	11.2452	GCATGTGCAGGCATGCACA
chr12	92552890	92553802	18	chr12	92552969	92552988	-	primary.p53+p63RE	10.2763	ACTAGCCAAGGCTTGCCAT
chr12	94202342	94202892	18	chr12	94202621	94202645	+	primary.unique-p63RE	9.09394	GTTGCAGGCCCAGGCACGTTCAGG
chr12	104263781	104264353	18	chr12	104263977	104263996	-	primary.p53+p63RE	10.6563	TCAAGCCCAGGCCTGTCTG
chr12	107296618	107297276	18	chr12	107296964	107296988	-	primary.unique-p63RE	9.26596	TTGTTCAAGTCTTTGCTTGCATCA
chr12	108696487	108696959	18	chr12	108696762	108696786	+	primary.unique-p63RE	9.00016	GTGGCAAGCCACAGCTTGATGGAA
chr12	108814749	108815365	18	chr12	108815051	108815070	+	primary.p53+p63RE	10.514	TAGCAAGTCCATACATGAT
chr12	108838224	108838766	18	chr12	108838492	108838511	+	primary.p53+p63RE	9.9662	TGACCTGCCCGTGCAGGCC
chr12	109497578	109498171	18	chr12	109497869	109497893	-	primary.unique-p63RE	9.25767	CACATCATGTCTGTGCCTGCTCTG
chr12	109864866	109865319	18	chr12	109865024	109865048	+	primary.unique-p63RE	8.73559	AATTCAAGCCTGTGCCTGCTCTGA
chr12	110340638	110341264	18	chr12	110340996	110341015	+	primary.p53+p63RE	12.899	GAGCATGTTTGAACATGTA
chr12	110370697	110371163	18	chr12	110370951	110370975	-	primary.unique-p63RE	8.32335	CCGCGCAGGCCCTGGCCTGCCACA
chr12	119667759	119668301	18	chr12	119668029	119668048	+	primary.p53+p63RE	10.3096	CGGCTTGCCTGGGCAGGTA
chr12	120042052	120042594	18	chr12	120042433	120042457	+	primary.unique-p63RE	9.91681	AGTTCAGGTTTGGACATGTTGAGT
chr12	120925681	120926454	18	chr12	120926057	120926076	-	primary.p53+p63RE	9.84672	GCAGGTAGAAGCATGTCTC
chr12	124577731	124578539	18	chr12	124577884	124577908	+	primary.unique-p63RE	8.45548	CACGCATGTCCTCGCAAGCCACAA
chr12	124938557	124939027	18	chr12	124938728	124938747	-	primary.p53+p63RE	13.1395	ACGTGCCCAGGCATGTCCC
chr12	132524304	132524849	18	chr12	132524299	132524313	+	tertiary.unique-p63RE	7.19003	CTGCCCGGCCAGGG
chr13	24851472	24852064	18	chr13	24851751	24851770	+	primary.p53+p63RE	9.28814	AGGCATGTCAGTTCTTGCA
chr13	26914679	26915193	18	chr13	26914955	26914974	+	primary.p53+p63RE	11.4254	GGGCGTGCCCAGACATGCA
chr13	27634064	27634680	18	chr13	27634404	27634428	+	primary.unique-p63RE	9.36751	AGAACAAGCCAGAACATGAGGAAG
chr13	39506995	39507499	18	chr13	39507274	39507298	-	primary.unique-p63RE	9.63851	CATTGCATGCTAGGACCTGTAGAC
chr13	44311049	44311535	18	chr13	44311264	44311288	-	primary.unique-p63RE	10.0744	CTCAGCAAGCTGAAGCTTGCAGGC
chr13	50529303	50529849	18	chr13	50529519	50529538	+	primary.p53+p63RE	14.5925	AGGCTTGTCCGGGCATGTC
chr13	50756139	50756657	18	chr13	50756340	50756359	-	primary.p53+p63RE	10.5935	GCAGGACTAGGCATGTCTG
chr13	52925839	52926386	18	chr13	52926156	52926170	-	secondary.p53+p63RE	10.6956	GGCATGTCCAGGCA
chr13	73677151	73677748	18	chr13	73677479	73677498	-	primary.p53+p63RE	9.51719	GCCTGTTCACACTTGCCCT
chr13	75666725	75667258	18	chr13	75666893	75666917	-	primary.unique-p63RE	8.6743	GGGCTCAAGTTGCTACTTGTTGGG
chr13	79647528	79648158	18	chr13	79647858	79647877	-	primary.p53+p63RE	10.2505	GCAAGTGGGGACAAGTCCA
chr13	97273091	97273817	18	chr13	97273366	97273385	-	primary.p53+p63RE	10.5823	ACAAGTCCAGGCTGGTCTA
chr13	106472158	106472550	18	chr13	106472361	106472385	-	primary.unique-p63RE	8.61183	GAGTGCCTGTTCCTGCCTGCTCGG
chr13	111937853	111938428	18	chr13	111938225	111938244	+	primary.p53+p63RE	11.9867	GAGCAAGCTCAGACATGCT
chr14	22536819	22537345	18	chr14	22537134	22537153	-	primary.p53+p63RE	13.2629	TCATGCCGAGGCATGTCTT
chr14	31462384	31462848	18	chr14	31462580	31462599	-	primary.p53+p63RE	9.28063	GCATGTTGGTGCGTGCCTG
chr14	31865399	31865865	18	chr14	31865672	31865686	+	secondary.p53+p63RE	8.83665	GCCTAGCCCTGCCC
chr14	63773474	63773987	18	chr14	63773702	63773721	+	primary.p53+p63RE	12.6763	AGGCATGCACCAACATGCC
chr14	64060164	64061075	18	chr14	64060664	64060683	+	primary.p53+p63RE	10.6584	TCACATGCCCCAACAAGTC
chr14	64722915	64723278	18	chr14	64723078	64723102	-	primary.unique-p63RE	8.54302	AGGGGCCTGCTGTAGCCTGCCTGC
chr14	68140266	68140860	18	chr14	68140517	68140536	+	primary.p53+p63RE	9.74548	TAACAGGCCAGGGCTTGCC
chr14	71371964	71372944	18	chr14	71372653	71372677	+	primary.unique-p63RE	8.13914	CTAACAAGTCCATTCAAGCAGTAG
chr14	77033108	77033662	18	chr14	77033444	77033468	-	primary.unique-p63RE	8.43439	CACCGCCTGCCAGGACCTGCCCAG
chr14	81329640	81330337	18	chr14	81329864	81329888	-	primary.unique-p63RE	8.477	CTGCACAAGTACCAACAGGTAAGC
chr14	81393634	81394027	18	chr14	81393824	81393843	+	primary.p53+p63RE	10.3903	AAGCCTGTCTGGACCTGTC
chr14	98903410	98903757	18	chr14	98903566	98903590	-	primary.unique-p63RE	8.78043	CCAGGCAGGTCCACACTTGAATTC
chr14	100693050	100693687	18	chr14	100693471	100693490	-	primary.p53+p63RE	9.22097	ACAAGCTGGAGCCTGCCCC
chr14	102987003	102987728	18	chr14	102987431	102987450	-	primary.p53+p63RE	12.4605	ACAAGTACAAGCATGTTCC
chr14	103868128	103869016	18	chr14	103868683	103868707	+	primary.unique-p63RE	10.0409	AGTGCAGGTTGCAGCATGTCAGGC
chr14	104968648	104968994	18	chr14	104968825	104968839	-	tertiary.unique-p63RE	7.75229	CGTGTGTGCACTTG
chr15	30961866	30962465	18	chr15	30962136	30962155	+	primary.p53+p63RE	10.105	GGGCAGGCCTAGACTTGCA
chr15	39177400	39178226	18	chr15	39177691	39177715	+	primary.unique-p63RE	8.16128	CCAACAAGCAGAGGCAGGAGCAGA
chr15	40359863	40360424	18	chr15	40360188	40360212	+	primary.unique-p63RE	8.8017	CCTGCAGGCCCGGGCAGGCAACCC
chr15	40456240	40456647	18	chr15	40456455	40456479	+	primary.unique-p63RE	7.96328	GTGGCAAGTCCCCGCACGTGGCCA
chr15	41832844	41833235	18	chr15	41833026	41833050	-	primary.unique-p63RE	8.31882	TCATGCGTGCCAAGGCAGGCAGCA
chr15	50686730	50687327	18	chr15	50687133	50687147	+	tertiary.unique-p63RE	8.45154	CTGTGCCGACTCGC
chr15	52558015	52558619	18	chr15	52558306	52558325	+	primary.p53+p63RE	11.131	GGGCATGATGGTACATGTC
chr15	61749041	61749496	18	chr15	61749303	61749327	+	primary.unique-p63RE	9.43772	CAAACAGGATTCAACATGCCAATT
chr15	63156870	63157679	18	chr15	63157234	63157253	+	primary.p53+p63RE	11.4147	GGGCAAGTCACTACATGCC
chr15	65246095	65246850	18	chr15	65246523	65246542	+	primary.p53+p63RE	11.2963	AGGCAGGCACAGACATGTC
chr15	71363999	71364635	18	chr15	71364274	71364293	-	primary.p53+p63RE	13.101	GCAAGTCTGGACAAGTTTG
chr15	71447266	71448172	18	chr15	71447858	71447877	-	primary.p53+p63RE	11.4332	GCATGTCACTGCATGTTCT
chr15	72222372	72222930	18	chr15	72222569	72222588	+	primary.p53+p63RE	9.32926	GTGCCTGCCAGGACATGTG
chr15	78988287	78988898	18	chr15	78988648	78988672	+	primary.unique-p63RE	8.27808	AGGGCAAGTGGAATCATGTGCTCC
chr15	80580089	80580918	18	chr15	80580458	80580482	-	primary.unique-p63RE	8.11747	TTCCACGGGCCAGAACATGTCCCA
chr15	82021949	82022527	18	chr15	82022215	82022234	+	primary.p53+p63RE	9.73009	TTGCAGGTCTCAACATGTT
chr15	83288406	83289000	18	chr15	83288698	83288712	-	secondary.p53+p63RE	8.59439	GGCAGGTCTGGGCA
chr15	89379280	89380149	18	chr15	89379639	89379658	-	primary.p53+p63RE	11.3216	GCATGTTTGAGCTTGCCCT
chr15	91866628	91867430	18	chr15	91867080	91867099	+	primary.p53+p63RE	10.179	GGGCATGTCAGGGCTGGCA
chr15	91953364	91953785	18	chr15	91953548	91953572	-	primary.unique-p63RE	9.3787	CCGCTCATGTTGGGGCCTGCACTC
chr15	98123884	98124426	18	chr15	98124055	98124079	-	primary.unique-p63RE	9.23176	GTGGGCGAGTCTAGACCTGCTCCA
chr15	98874817	98875207	18	chr15	98875008	98875032	-	primary.unique-p63RE	8.27055	TGTCACTTGCCAGTACTTGTTCTC
chr15	99967792	99968251	18	chr15	99967943	99967962	+	primary.p53+p63RE	10.8432	GGGCGTGTCAGAACATGCT
chr15	100877300	100877977	18	chr15	100877647	100877666	-	primary.p53+p63RE	11.517	GCTTGTCTGGACAAGCCCA
chr16	2348693	2348976	18	chr16	2348823	2348847	+	primary.unique-p63RE	8.7918	TGGGCATGAGCCATCATGCCCGGT
chr16	4140645	4141163	18	chr16	4140870	4140889	+	primary.p53+p63RE	12.291	GAACATGCCCAGGCATGCG
chr16	10429208	10429672	18	chr16	10429492	10429511	-	primary.p53+p63RE	11.7633	GCATGTGCCAGCATGCCTG
chr16	11497001	11497765	18	chr16	11497123	11497142	+	primary.p53+p63RE	9.42036	GTGCAGGTCTGTGCATGTA
chr16	12538456	12538892	18	chr16	12538693	12538712	+	primary.p53+p63RE	10.6377	GGGCGAGCCTGGGCATGTA
chr16	21150656	21151131	18	chr16	21150900	21150919	+	primary.p53+p63RE	10.4715	ATACAAGACTGGGCATGAC
chr16	28537044	28537637	18	chr16	28537304	28537323	-	primary.p53+p63RE	10.8453	GCAAGCACACACATGCCCG
chr16	31451690	31452068	18	chr16	31451890	31451914	-	primary.unique-p63RE	9.79446	TGATACATGCTCTGGCCTGCTGCG
chr16	34581201	34581889	18	-	-	-		Other	0	-
chr16	34594525	34595380	18	-	-	-		Other	0	-
chr16	46380666	46381171	18	-	-	-		Other	0	-
chr16	46399237	46399596	18	-	-	-		Other	0	-
chr16	46400010	46400266	18	-	-	-		Other	0	-
chr16	46400531	46401151	18	-	-	-		Other	0	-
chr16	53142604	53143260	18	chr16	53142991	53143010	+	primary.p53+p63RE	10.4785	AGGCATGACTGAACTTGAT
chr16	56334748	56335219	18	chr16	56334969	56334983	-	tertiary.unique-p63RE	8.04478	CGGGCTGGGGCAGG
chr16	57276584	57276970	18	chr16	57276728	57276752	-	primary.unique-p63RE	8.90054	GGAGGCATGCTGTTGCAGGCAGGA
chr16	58280053	58280993	18	chr16	58280284	58280308	-	primary.unique-p63RE	8.93498	TACAACCTGTTCTGACCTGCAAAA
chr16	67961594	67962090	18	chr16	67961800	67961824	-	primary.unique-p63RE	8.83132	TGAGACAGGCCTGGGCCTGATCCC
chr16	67966186	67966635	18	chr16	67966361	67966380	+	primary.p53+p63RE	12.6907	GGGCAGGTCTGGACATGCC
chr16	68936693	68937346	18	chr16	68936896	68936915	-	primary.p53+p63RE	10.7297	ACATGCCCAAACAAATCAC
chr16	74291737	74292183	18	chr16	74291961	74291985	+	primary.unique-p63RE	9.10741	AGAACAAGCTGCAACATGAGAGTG
chr16	74462329	74462779	18	chr16	74462508	74462532	+	primary.unique-p63RE	8.28412	CAGGCAAGAGATGACTTGTCCTTC
chr16	75011421	75012144	18	chr16	75011743	75011762	-	primary.p53+p63RE	9.47955	ACGAGCCCAGTCATGTTGG
chr16	79658186	79659019	18	chr16	79658477	79658501	-	primary.unique-p63RE	8.29526	CATGGCCTGTCGTGGCTTGCGAAG
chr16	80120812	80121365	18	chr16	80121080	80121104	+	primary.unique-p63RE	9.85864	TCTGCAGGCATGGACTTGCCCTTC
chr16	81621465	81621825	18	chr16	81621632	81621651	+	primary.p53+p63RE	10.1853	GAACAAGCTTTGACAGGCC
chr16	81928893	81929452	18	chr16	81929300	81929319	-	primary.p53+p63RE	10.5291	GCAGGCACGGGCATGCTCC
chr16	84196874	84197476	18	chr16	84197131	84197145	-	tertiary.unique-p63RE	8.31915	CACGTTTGGGCTTG
chr16	85360254	85360970	18	chr16	85360647	85360666	+	primary.p53+p63RE	10.5973	GGGCACGTCCAGACATGCA
chr16	88298144	88298593	18	chr16	88298391	88298415	-	primary.unique-p63RE	7.80696	GCCGCCAAGTTGCTGCTTGTTCAC
chr16	88879327	88879978	18	chr16	88879744	88879768	-	primary.unique-p63RE	9.31439	TGTCACAAGTCAAAGCTTGCACTC
chr16	89441941	89442427	18	chr16	89442228	89442247	+	primary.p53+p63RE	12.3556	GAACATGCCAGGTCATGTC
chr16	89476320	89476946	18	chr16	89476636	89476660	+	primary.unique-p63RE	7.99832	GCCGCAGGCACTAGCCTGCCAAAA
chr16	89880761	89881366	18	chr16	89881174	89881193	-	primary.p53+p63RE	10.1154	GCAAGCACAGACCTGCCCT
chr17	4187021	4187639	18	chr17	4187326	4187350	-	primary.unique-p63RE	8.60085	CAGGACAGGTCATTGCTTGTCAAG
chr17	17913779	17914500	18	chr17	17914016	17914040	+	primary.unique-p63RE	8.44214	GTAGCAAGTCCAGGCCCGCAGGCA
chr17	19723967	19724353	18	chr17	19724174	19724198	+	primary.unique-p63RE	7.8618	TCAGCATGTTGCTGCCAGACTTGA
chr17	25920065	25920362	18	chr17	25920092	25920111	+	quinary.unique-p63RE	7.48106	CTTTGATAGTTCAGGTTTG
chr17	28282462	28283105	18	chr17	28282810	28282829	+	primary.p53+p63RE	12.6763	AGGCATGCACCAACATGCC
chr17	31274135	31274760	18	chr17	31274427	31274446	+	primary.p53+p63RE	10.8519	GTACAAGCCAGTACATGTT
chr17	37361432	37362189	18	chr17	37361430	37361449	-	primary.p53+p63RE	9.32835	GCCAGCCCCTGCATGTCCT
chr17	40582134	40582992	18	chr17	40582481	40582495	-	tertiary.unique-p63RE	8.24274	CTTGTCAGGACGTG
chr17	41800536	41801114	18	chr17	41800741	41800755	+	tertiary.unique-p63RE	7.62677	CTGCGCAGACACGC
chr17	43418593	43419469	18	chr17	43419334	43419348	+	tertiary.unique-p63RE	7.04288	CTGTCCAGCCACAT
chr17	43615128	43615817	18	chr17	43615450	43615469	-	primary.p53+p63RE	9.23747	ACAAGTCGAGGCAGGATCA
chr17	44138108	44138690	18	chr17	44138471	44138495	+	primary.unique-p63RE	8.72877	TACACATGTACGCACACGCCCAGG
chr17	44152737	44153433	18	chr17	44153079	44153098	+	primary.p53+p63RE	11.5181	AGACATGCCAGTACATGTG
chr17	44348784	44349177	18	chr17	44348936	44348955	+	primary.p53+p63RE	9.21905	TTACAGGTCCGCACATGCT
chr17	44918031	44918441	18	chr17	44918203	44918222	+	primary.p53+p63RE	9.55596	CAGCAAGTCACAGCATGTA
chr17	49501510	49501952	18	chr17	49501685	49501709	+	primary.unique-p63RE	9.77365	TGTGCAAGCTACAACCTGTCCAAC
chr17	50062350	50062849	18	chr17	50062657	50062671	+	secondary.p53+p63RE	9.59384	GCCCTGGCATGCCC
chr17	51153394	51154109	18	chr17	51153805	51153829	+	primary.unique-p63RE	8.19221	TGGACAAGTGCAGACCGGTCGGCG
chr17	57236795	57237451	18	chr17	57237088	57237107	+	primary.p53+p63RE	11.1832	AAACAAGCCCTAGCTTGCC
chr17	58364565	58365102	18	chr17	58364834	58364853	+	primary.p53+p63RE	10.0005	GAGCCTGTCAGGGCAGGTC
chr17	66675977	66676860	18	chr17	66676454	66676473	+	primary.p53+p63RE	12.0778	AGGCTTGCCCCGACAGGTC
chr17	73271052	73271485	18	chr17	73271274	73271293	-	primary.p53+p63RE	10.6188	ACATGTAGAGTCTTGTCAA
chr17	73625019	73625427	18	chr17	73625190	73625214	+	primary.unique-p63RE	8.67587	CAGGCAGGACCAGACAAGCAGGCA
chr17	74872653	74873160	18	chr17	74872993	74873017	-	primary.unique-p63RE	8.31145	CAGGGCAAGCCCGCTCCTGCCCGG
chr17	75700327	75701039	18	chr17	75700767	75700791	+	primary.unique-p63RE	9.07526	ACAACAAGCTCCAGCCTGTAAGGA
chr17	76131957	76133017	18	chr17	76132382	76132401	-	primary.p53+p63RE	10.0155	TCAAGCCCCAGCATGCCCA
chr17	76581598	76581912	18	chr17	76581744	76581763	+	primary.p53+p63RE	10.2605	GGACCAGCCTGCACATGCC
chr17	78383815	78384424	18	chr17	78384173	78384197	-	primary.unique-p63RE	10.255	GTCAGCATGTAGCTGCATGCTGGC
chr17	80861890	80862469	18	chr17	80862154	80862178	-	primary.unique-p63RE	9.61495	CTGGGCATGCCCTTGCCTGCAGTG
chr17	81087196	81087535	18	chr17	81087343	81087362	-	primary.p53+p63RE	9.26531	TCAAGCCTTGGCAAGCCCC
chr17	81239676	81240140	18	chr17	81239854	81239873	+	primary.p53+p63RE	11.6431	GGGCTTGTCCCTGCATGTT
chr17	82133533	82134360	18	chr17	82133719	82133738	-	primary.p53+p63RE	10.2618	GCGTGTTGGTGCATGCCTG
chr17	82384541	82385228	18	chr17	82384765	82384784	-	primary.p53+p63RE	9.45365	ACCTGCCCGGGCACGCTCC
chr17	82787152	82787887	18	chr17	82787597	82787621	-	primary.unique-p63RE	10.1152	CTGTACATGATGAAACTTGCAGGT
chr17	82875990	82876433	18	chr17	82876182	82876201	-	primary.p53+p63RE	9.36705	ACAAGTCGAGGCGTGCACT
chr18	2147924	2148315	18	chr18	2148093	2148112	+	primary.p53+p63RE	9.70037	CAGCATGCCTCCACTTGCT
chr18	9671148	9671573	18	chr18	9671347	9671366	-	primary.p53+p63RE	9.97135	GCATGTGCAGGCCTGCCGG
chr18	12309634	12310270	18	chr18	12310125	12310144	+	primary.p53+p63RE	10.3061	GGTCATGCCTGGACTCGTT
chr18	12470772	12471146	18	chr18	12470952	12470976	-	primary.unique-p63RE	8.38684	AGGGGCCAGTCTGGGCACGTAACT
chr18	31255950	31256314	18	chr18	31256107	31256131	-	primary.unique-p63RE	8.53177	GACGGCAGGTTAGATCTTGCCTTC
chr18	49609690	49610325	18	chr18	49610077	49610096	-	primary.p53+p63RE	10.2079	ACAGGCCCAGACAGGCCTG
chr18	51321580	51322210	18	chr18	51321922	51321941	-	primary.p53+p63RE	9.37919	ACCTGCCCTGACTTGCAAC
chr18	54023411	54023854	18	chr18	54023601	54023620	+	primary.p53+p63RE	10.861	GGGCATGACTATACTTGTT
chr18	54247044	54247505	18	chr18	54247300	54247324	+	primary.unique-p63RE	9.66322	CCTGCAGGCCCCGACAGGCCTTTG
chr18	59700227	59700683	18	chr18	59700455	59700474	-	primary.p53+p63RE	10.1216	GCAAGCCCAGGCCTGCCCT
chr18	63345962	63346475	18	chr18	63346233	63346247	+	secondary.p53+p63RE	8.5137	GCCCAGCCATGCTC
chr18	76806144	76806825	18	chr18	76806563	76806577	+	secondary.p53+p63RE	8.62838	GCCCTGCCCTGCCC
chr18	80179942	80180612	18	chr18	80180333	80180357	+	primary.unique-p63RE	7.97155	CCGGCAGGTGAGGACACGCAGCTG
chr18	80233822	80234582	18	chr18	80234117	80234136	-	primary.p53+p63RE	10.0869	TCAAGTTCAGGCACGTTTT
chr19	1027710	1028658	18	chr19	1028267	1028291	-	primary.unique-p63RE	9.1669	GGGGGCAGGTTGATACCTGCCCTG
chr19	4624713	4625276	18	chr19	4624894	4624913	+	primary.p53+p63RE	10.1002	AGGCATGAGCCAACATGCC
chr19	4713220	4713836	18	chr19	4713472	4713486	-	tertiary.unique-p63RE	6.85429	CGTGCAGGCACACG
chr19	6092257	6092901	18	chr19	6092551	6092575	+	primary.unique-p63RE	9.11296	GCGACAAGCATGAGCTTGTGGCTG
chr19	8489481	8489884	18	chr19	8489637	8489661	-	primary.unique-p63RE	8.35797	CCATGCGTGTTCAGTCCTGCCAGA
chr19	11083903	11084510	18	chr19	11084356	11084380	-	primary.unique-p63RE	8.6533	CCGGGCGTGTTGGCTCATGTCTGT
chr19	13844162	13844614	18	chr19	13844412	13844436	+	primary.unique-p63RE	8.0718	GATGCAGGATCTGACAGGTTGGGG
chr19	18364609	18365328	18	chr19	18364988	18365007	-	primary.p53+p63RE	13.6752	GCATGTCCCGGCATGTCTG
chr19	33350443	33350967	18	chr19	33350635	33350654	+	primary.p53+p63RE	9.75315	GAGCAGGTCACAACATGCC
chr19	38559593	38560193	18	chr19	38559789	38559813	+	primary.unique-p63RE	8.51749	ACTGCATGTTGCTACCCGTCTGGA
chr19	38792884	38793562	18	chr19	38793304	38793323	-	primary.p53+p63RE	10.0298	ACATGTGGGAACTTGTCCC
chr19	40302231	40302613	18	chr19	40302406	40302425	+	primary.p53+p63RE	13.9093	AGGCATGCACGAACATGTC
chr19	42281205	42281661	18	chr19	42281359	42281383	+	primary.unique-p63RE	9.27865	TGGGCAGGCCTCAGCCTGTACCGC
chr19	43606887	43607260	18	chr19	43607061	43607080	+	primary.p53+p63RE	9.34422	TGGCAGGCCAGGGCTTGTA
chr19	43759087	43759888	18	chr19	43759430	43759449	+	primary.p53+p63RE	10.3039	AAACAAGCACCGGCTTGTT
chr19	46784502	46785113	18	chr19	46784832	46784856	+	primary.unique-p63RE	8.53671	ACGGCAGGCCAGGGCAGGTCGCCC
chr19	47231172	47231986	18	chr19	47231319	47231338	+	primary.p53+p63RE	11.7536	GGACAAGTCAGGACTTGCA
chr19	47633485	47634166	18	chr19	47633792	47633816	+	primary.unique-p63RE	8.55951	GTGACAAGCCCTGACCTGAAGCCA
chr19	47718954	47719370	18	chr19	47719158	47719172	-	tertiary.unique-p63RE	9.72015	CACGTCTGGGCAGG
chr19	48053701	48054235	18	chr19	48054002	48054021	-	primary.p53+p63RE	11.2851	ACATGCATAAACATGCAAG
chr19	49064019	49064431	18	chr19	49064232	49064256	+	primary.unique-p63RE	7.73499	AGGACAGGCCAGGGCCCGCCCAAG
chr19	55643137	55643682	18	chr19	55643251	55643265	-	tertiary.unique-p63RE	7.78224	CCAGTCGGAACTGG
chr2	3558189	3558717	18	chr2	3558462	3558486	-	primary.unique-p63RE	8.1988	AACTTCCTGTCGGTACTTGAAGAA
chr2	9801052	9802055	18	chr2	9801295	9801319	-	primary.unique-p63RE	8.9259	TCCCACCTGCAGGGACTTGCCCAG
chr2	14586913	14587661	18	chr2	14587287	14587306	-	primary.p53+p63RE	9.82127	GCATGCAGAGTCATGTTTT
chr2	20172201	20172706	18	chr2	20172463	20172487	-	primary.unique-p63RE	8.98239	TGGGGCCTGTGGGGACCTGCAGAG
chr2	20179521	20180149	18	chr2	20179841	20179865	+	primary.unique-p63RE	8.04922	CGGGCAGGCCAGTGCAGGCCAGGC
chr2	20422021	20422438	18	chr2	20422256	20422275	-	primary.p53+p63RE	9.51473	ACCTGCTCAGGCTCGCCTG
chr2	20510039	20510736	18	chr2	20510412	20510431	+	primary.p53+p63RE	9.44897	GGGCATGCTAGCACACGCC
chr2	25719548	25720056	18	chr2	25719836	25719860	-	primary.unique-p63RE	8.05655	CCTGGCCAGTCCAGTCCTGCCTGC
chr2	31379065	31379475	18	chr2	31379229	31379248	+	primary.p53+p63RE	10.3995	AGACCTGCCCCAACAGGCC
chr2	31390198	31390874	18	chr2	31390466	31390485	+	primary.p53+p63RE	11.2695	AAGCATGCCTGTGCAGGTT
chr2	33014298	33014743	18	chr2	33014551	33014570	+	primary.p53+p63RE	11.0608	AGACATGCTGCAACTTGTT
chr2	39097511	39097920	18	chr2	39097704	39097723	+	primary.p53+p63RE	10.5289	AGGCATGCACCATCATGCC
chr2	42795839	42796442	18	chr2	42796177	42796196	-	primary.p53+p63RE	12.1608	ACATGCAGAGACTTGCCCA
chr2	46134283	46134895	18	chr2	46134586	46134605	-	primary.p53+p63RE	10.548	GCAAGTTCAAGCAAGTTCT
chr2	54124698	54125100	18	chr2	54124890	54124909	-	primary.p53+p63RE	11.5053	GCATGTACTGTCATGCCCA
chr2	64055958	64056388	18	chr2	64056201	64056225	-	primary.unique-p63RE	9.51163	TCTAGCATGTAACCACATGCTGCC
chr2	65068796	65069209	18	chr2	65068928	65068947	+	primary.p53+p63RE	12.7867	GGGCATGCCCTGACTTGCT
chr2	68807826	68808427	18	chr2	68808201	68808225	+	primary.unique-p63RE	8.78745	GTTGCCTGCGTGAACTTGTCCTGC
chr2	70596314	70597586	18	chr2	70597091	70597110	-	primary.p53+p63RE	15.2778	ACATGCCCAGGCATGTCTG
chr2	72934667	72935247	18	chr2	72934919	72934933	-	tertiary.unique-p63RE	7.96229	CGTGCCAGGGCCCG
chr2	73925938	73926420	18	chr2	73926160	73926184	-	primary.unique-p63RE	8.77493	TTATACAAGTCTCTACTCGCCATT
chr2	73939434	73939817	18	chr2	73939620	73939639	+	primary.p53+p63RE	11.7909	AGACTTGTTTCGACATGAC
chr2	96927797	96928226	18	chr2	96928018	96928042	+	primary.unique-p63RE	8.91103	ACGGCAGGCTGGCACATGTGTGGG
chr2	101113238	101114075	18	chr2	101113414	101113433	+	primary.p53+p63RE	9.47215	AAACAAGACTGAACATGAA
chr2	101741981	101742498	18	chr2	101742246	101742270	+	primary.unique-p63RE	8.83676	CAGGCAGGTACAGGCAGGTTCTGA
chr2	128373526	128374524	18	chr2	128373664	128373688	+	primary.unique-p63RE	8.80861	GATTCAAGTTGGAGCACGTTCCTC
chr2	134131684	134132108	18	chr2	134131812	134131836	-	primary.unique-p63RE	9.07487	TTTTACAGGACTGGGCTTGCACCT
chr2	137168367	137168946	18	chr2	137168727	137168751	-	primary.unique-p63RE	8.25684	TGACTCATGCCATGTCTTGCTCAA
chr2	142857190	142857775	18	chr2	142857433	142857452	-	primary.p53+p63RE	10.2618	GCGTGTTGGTGCATGCCTG
chr2	144102278	144102853	18	chr2	144102583	144102602	-	primary.p53+p63RE	11.9495	ACATGTCATGACATGTGCA
chr2	150485241	150485686	18	chr2	150485476	150485500	-	primary.unique-p63RE	8.7602	ACCTGCTTGTTGGCACTTGCGCGT
chr2	153059512	153060045	18	chr2	153059856	153059875	-	primary.p53+p63RE	12.0133	ACATGCTCAGTCATGCTTT
chr2	153405167	153405558	18	chr2	153405367	153405386	-	primary.p53+p63RE	11.6191	GCATGCACAGGCATGCACA
chr2	158761607	158762168	18	chr2	158761874	158761898	+	primary.unique-p63RE	8.14715	AGGTCAGGTAAGAACCTGTCTGGA
chr2	160220440	160221015	18	chr2	160220780	160220804	-	primary.unique-p63RE	8.8707	CGGAACCAGTCTCATCATGCCCAC
chr2	168614536	168614937	18	chr2	168614747	168614761	+	secondary.p53+p63RE	9.07473	GCCTAGCCTTGCCC
chr2	176473209	176473718	18	chr2	176473405	176473424	+	primary.p53+p63RE	9.69172	GGGCATGCTAGAACCTGCT
chr2	187986337	187986912	18	chr2	187986538	187986557	-	primary.p53+p63RE	11.331	GCATGTACCGGCTTGTTTG
chr2	191171557	191172241	18	chr2	191171942	191171966	-	primary.unique-p63RE	8.67264	GAGGTCATGTGCTAGCTTGCAAGA
chr2	196925518	196926244	18	chr2	196925787	196925811	+	primary.unique-p63RE	9.13338	CAGGCAAGCCCACACACGCACGGC
chr2	200129499	200130360	18	chr2	200129913	200129932	+	primary.p53+p63RE	9.69581	TGACAAGAATGAACTTGTC
chr2	203656562	203657044	18	chr2	203656771	203656795	-	primary.unique-p63RE	8.99986	TGATGCAAGCAGAGGCTTGAAAAG
chr2	205670253	205670689	18	chr2	205670477	205670491	-	secondary.p53+p63RE	9.8952	GGCATGCCTGGGCC
chr2	216362757	216363580	18	chr2	216363426	216363445	+	primary.p53+p63RE	11.0625	GAGCAAGTTTGTACATGTA
chr2	216551717	216552058	18	chr2	216551898	216551917	-	primary.p53+p63RE	11.3306	GCATGTTCGGGCCAGTCTG
chr2	222837552	222838335	18	chr2	222837899	222837918	-	primary.p53+p63RE	10.3868	ACAAGTTTATTCATGTTCT
chr2	231701700	231702272	18	chr2	231702048	231702062	-	secondary.p53+p63RE	8.42385	GGCAGGCCTGGGCG
chr2	234306409	234306819	18	chr2	234306629	234306653	-	primary.unique-p63RE	10.1713	CTCAGCAAGTCCTAGCTTGCAGGA
chr2	235026307	235027240	18	chr2	235027137	235027151	+	secondary.p53+p63RE	8.31986	GCCAAGCCACGCCC
chr2	240433698	240434402	18	chr2	240434093	240434117	+	primary.unique-p63RE	8.51365	CAGGCAAGAAGGAGCAAGCCTGGA
chr2	241287571	241288066	18	chr2	241287767	241287786	+	primary.p53+p63RE	11.5456	ATACATGTTTGTACATGCA
chr2	241390900	241391269	18	chr2	241391079	241391103	-	primary.unique-p63RE	8.46057	ACGCACAAGTAAGGACAGGCAAGC
chr20	1500054	1500867	18	chr20	1500582	1500601	-	primary.p53+p63RE	10.4994	ACATGCCCAGACACGCCAC
chr20	3235501	3236337	18	chr20	3235835	3235859	-	primary.unique-p63RE	8.88815	CTAGGCATGCAAGGTCCTGTCCTC
chr20	3893347	3893867	18	chr20	3893601	3893620	-	primary.p53+p63RE	11.9901	GCATGTTGTAGCATGCCAG
chr20	5668300	5668951	18	chr20	5668433	5668457	+	primary.unique-p63RE	9.02114	CCAACAAGAGGCAACATGCACTTT
chr20	6654682	6655390	18	chr20	6654969	6654988	-	primary.p53+p63RE	12.2317	GCGTGTCCTGGCATGTCCT
chr20	10557609	10558216	18	chr20	10557916	10557940	-	primary.unique-p63RE	9.25991	CAGTGCATGACAGGACCTGCAGAG
chr20	11906959	11907699	18	chr20	11907196	11907215	-	primary.p53+p63RE	11.1521	GCATGTAGGGACTTGCTTT
chr20	19913982	19914945	18	chr20	19914368	19914392	+	primary.unique-p63RE	8.09336	TTTGCCTGTCTGCACACGCTCTGC
chr20	19928326	19928976	18	chr20	19928446	19928470	-	primary.unique-p63RE	8.63405	TTGCACAAGTTGCTGCCTGAAGAA
chr20	19958198	19958721	18	chr20	19958425	19958449	-	primary.unique-p63RE	8.00118	CCACTCTTGCTGAAACCTGCATGG
chr20	22743320	22743782	18	chr20	22743581	22743600	-	primary.p53+p63RE	9.35849	ACAAGCCCGTGCTTGTTTC
chr20	22966838	22967581	18	chr20	22967212	22967231	+	primary.p53+p63RE	10.2523	GGGCAAGATCGGGCATGCA
chr20	35451210	35451919	18	chr20	35451427	35451446	+	primary.p53+p63RE	10.9115	AGACAGGTCTGAACATGAT
chr20	36142711	36143171	18	chr20	36142945	36142959	+	tertiary.unique-p63RE	7.20606	TTGTCCATTCACGT
chr20	36251447	36252104	18	chr20	36251629	36251653	-	primary.unique-p63RE	8.83997	CACTGCGTGTTGCCGCATGCCTAG
chr20	36408258	36408741	18	chr20	36408487	36408511	-	primary.unique-p63RE	8.63903	CTGAGCTTGTTCCTGCAGGCAGTC
chr20	36861799	36862577	18	chr20	36862162	36862186	+	primary.unique-p63RE	9.08238	AAGGCAGGCAGAGACAGGCCTGCG
chr20	37295542	37296039	18	chr20	37295737	37295761	-	primary.unique-p63RE	7.86715	GTATGCGAGTTGCTGCCTGTAAAG
chr20	37331904	37332660	18	chr20	37332308	37332332	+	primary.unique-p63RE	8.14604	GATTCCTGTCCCAACAAGTGTTGG
chr20	47377030	47377655	18	chr20	47377278	47377297	-	primary.p53+p63RE	12.128	ACAAGCCAAGACATGCCAG
chr20	50496561	50497341	18	chr20	50496893	50496917	+	primary.unique-p63RE	8.26722	TCTGCAAGAACCATCTTGCCCTAG
chr20	50729167	50730211	18	chr20	50729731	50729750	-	primary.p53+p63RE	9.46271	ACAGGCCCTGACATGCACT
chr20	50865549	50866211	18	chr20	50865820	50865844	+	primary.unique-p63RE	8.57064	AGGGCAGGACTGGACACGCAGGGG
chr20	50992310	50992845	18	chr20	50992539	50992558	-	primary.p53+p63RE	9.58936	GCAAGTAGAGGCAGGTTTG
chr20	54105688	54106155	18	chr20	54105963	54105987	-	primary.unique-p63RE	8.96626	CAAAGCAAGCACAGTCTTGCACTG
chr20	57179157	57179715	18	chr20	57179361	57179380	+	primary.p53+p63RE	9.21123	AGACAAGTCAGGACTGGTG
chr20	57262979	57263681	18	chr20	57263374	57263393	+	primary.p53+p63RE	10.9854	AAACAAGTCCCAGCTTGCT
chr20	57435535	57436245	18	chr20	57435872	57435896	-	primary.unique-p63RE	9.46711	GCAGGCATGCCCCAGCCTGTGGTT
chr20	61789403	61789906	18	chr20	61789642	61789666	-	primary.unique-p63RE	8.19549	CGCTGCGTGCATGAGCCTGCCTTG
chr20	61812717	61813155	18	chr20	61812916	61812935	+	primary.p53+p63RE	9.28441	ACACAAGCCCTAACATGAT
chr20	62241367	62241884	18	chr20	62241532	62241556	+	primary.unique-p63RE	8.71587	CATGCAAGCCATGTCTTGTCTGGC
chr20	62378022	62378617	18	chr20	62378259	62378273	-	secondary.p53+p63RE	8.36114	GACAAGCCTGGGCG
chr20	63255998	63256587	18	chr20	63256401	63256425	+	primary.unique-p63RE	8.84787	AGAGCAGGTCTGCACAGGTCCCAC
chr21	8219773	8220310	18	chr21	8219878	8219892	-	septary.unique-p63RE	10.5967	GGTTTTGTCTTGCC
chr21	31504000	31504403	18	chr21	31504169	31504193	-	primary.unique-p63RE	9.31121	ACTGACAGGTTCCTGCTTGCTGGC
chr21	33428605	33429311	18	chr21	33428900	33428924	-	primary.unique-p63RE	8.09807	GAGGGCGAGTTGCCACTTGTATCC
chr21	36434556	36435012	18	chr21	36434786	36434810	-	primary.unique-p63RE	8.40633	GCTGTCCTGTTGAGACTTGTGCCT
chr21	37647751	37648327	18	chr21	37647956	37647980	+	primary.unique-p63RE	8.15817	ACCTCAAGTTGGGACAAGCAGTCT
chr21	40886796	40887447	18	chr21	40887122	40887146	-	primary.unique-p63RE	9.45403	CTCAGCAGGTTTGTACCTGCAAAT
chr21	41751532	41751955	18	chr21	41751711	41751735	+	primary.unique-p63RE	8.4797	CGGGCAAGTGGCTGCAAGTCCTTT
chr21	42955408	42956076	18	chr21	42955666	42955690	-	primary.unique-p63RE	8.03628	AAGAACTAGTAAATACTTGTTACC
chr22	17884088	17884497	18	chr22	17884303	17884322	+	primary.p53+p63RE	9.5925	GAACCTGCCCAGGCAGGCA
chr22	17920001	17920659	18	chr22	17920254	17920268	+	tertiary.unique-p63RE	6.99174	CTGCCCCGTCATCT
chr22	24965957	24966654	18	chr22	24966383	24966402	+	primary.p53+p63RE	10.1043	TGGCCTGTCTGGACTTGAA
chr22	27930277	27930968	18	chr22	27930549	27930568	+	primary.p53+p63RE	10.9844	GAACAAGTCAGAGCTTGTT
chr22	29992794	29993324	18	chr22	29993143	29993167	-	primary.unique-p63RE	8.81556	ACAGGCGTGTCCAGGCTAGCAGAA
chr22	30841248	30842076	18	chr22	30841467	30841491	-	primary.unique-p63RE	9.73036	TTATGCGTGTTGCTACATGTATCA
chr22	31683113	31683773	18	chr22	31683391	31683410	+	primary.p53+p63RE	9.24623	AAACATGCCTGGACAAGGG
chr22	32280993	32281434	18	chr22	32281162	32281186	-	primary.unique-p63RE	9.17447	TCATTCATGTCACGTCTTGCTGCC
chr22	32991645	32992086	18	chr22	32991890	32991914	+	primary.unique-p63RE	8.69033	CAGGCAGGCCTCCACAGGCCCCAA
chr22	38124209	38124696	18	chr22	38124421	38124435	+	secondary.p53+p63RE	7.9016	GCCCTGACACGTCT
chr22	39097051	39097666	18	chr22	39097292	39097311	-	primary.p53+p63RE	11.5931	ACAAGCAGGGGCAAGTCTG
chr22	42389075	42389595	18	chr22	42389404	42389428	+	primary.unique-p63RE	8.33614	TTGACAAGTCCTGACCCGCTGGGT
chr22	43404524	43405082	18	chr22	43404820	43404834	+	secondary.p53+p63RE	8.77784	GCCCAGGCTTGTCT
chr22	44685496	44685990	18	chr22	44685718	44685732	-	secondary.p53+p63RE	10.4006	GACATGCCCAGGCA
chr22	45537669	45538243	18	chr22	45537875	45537899	-	primary.unique-p63RE	9.36603	ATAGTCCTGCTCAGACTTGCAGCC
chr22	46147729	46148357	18	chr22	46148064	46148088	-	primary.unique-p63RE	8.90856	GCTGGCAGGTCAGCACTTGCAGGA
chr22	47767114	47767893	18	chr22	47767562	47767576	-	tertiary.unique-p63RE	6.99033	CACGTTGGAACTTG
chr3	5004623	5005149	18	chr3	5004785	5004809	+	primary.unique-p63RE	9.65355	TCTGCAGGCCTCGACAGGCTCTGA
chr3	10194423	10194865	18	chr3	10194696	10194715	+	primary.p53+p63RE	11.0275	AGGCATGCATGGGCCTGCC
chr3	11770514	11771366	18	chr3	11770927	11770946	-	primary.p53+p63RE	9.6259	ACAAGTGGGTACATGTACC
chr3	13836707	13837223	18	chr3	13836931	13836955	-	primary.unique-p63RE	9.43174	GAAGGCAAGTTGGGACCTGAAGGG
chr3	30346232	30346630	18	chr3	30346389	30346408	-	primary.p53+p63RE	9.62922	ACCAGCCCTGGCTTGTTCA
chr3	58874177	58874764	18	chr3	58874506	58874525	-	primary.p53+p63RE	13.2789	GCATGTTCTGACATGTCTG
chr3	59566328	59566803	18	chr3	59566520	59566539	-	primary.p53+p63RE	10.4117	GCATGTCCAGACCTGTGCA
chr3	72628048	72628480	18	chr3	72628232	72628256	-	primary.unique-p63RE	9.33346	CTTAGCAAGCTGGAGCCTGTTTGC
chr3	72754600	72755149	18	chr3	72754752	72754771	-	primary.p53+p63RE	10.1629	GCAAGTTCTGACTTGCACA
chr3	100600274	100600878	18	chr3	100600592	100600606	-	secondary.p53+p63RE	8.9121	GGCAGGGCCAGGCA
chr3	108006114	108006784	18	chr3	108006514	108006538	-	primary.unique-p63RE	8.33393	AAAGGCGTGTTGGTGCAGGTTTCA
chr3	119638757	119639344	18	chr3	119639116	119639135	+	primary.p53+p63RE	10.1201	GCACATGTCAGGGCATGAA
chr3	123740363	123740921	18	chr3	123740517	123740541	+	primary.unique-p63RE	9.14107	CTGGCAAGTAGCAGCAAGCTGAAA
chr3	128095138	128095623	18	chr3	128095394	128095408	-	secondary.p53+p63RE	8.89379	AGCAAGTCCAGACA
chr3	139601158	139602142	18	chr3	139601805	139601829	+	primary.unique-p63RE	8.88377	TGAACAGGTTGGAACACGTTTTCT
chr3	141937553	141938040	18	chr3	141937785	141937809	+	primary.unique-p63RE	8.45841	CCTGCCTGCCCTGGCAGGCACCTG
chr3	146582061	146582522	18	chr3	146582300	146582319	-	primary.p53+p63RE	14.5554	ACTTGCCCAGACATGTCTG
chr3	151318804	151319353	18	chr3	151319163	151319187	-	primary.unique-p63RE	9.81906	TAATACATGTTTAGTCATGAAAAA
chr3	153160454	153161130	18	chr3	153160791	153160810	-	primary.p53+p63RE	9.25503	ACAAGTCGGGGCATCTCCC
chr3	153614433	153615122	18	chr3	153614796	153614815	+	primary.p53+p63RE	14.4573	AGGCATGTCAGGGCATGTC
chr3	159783847	159784652	18	chr3	159784252	159784276	-	primary.unique-p63RE	9.8782	TTGAGCAAGTCTACACCTGTTCAT
chr3	161420759	161421181	18	chr3	161420931	161420955	+	primary.unique-p63RE	8.34897	AAAACAAGCAAATACACGCTCCAT
chr3	167940157	167940580	18	chr3	167940399	167940418	+	primary.p53+p63RE	11.8049	AGACATGACTGGTCATGTT
chr3	170689225	170689860	18	chr3	170689449	170689473	+	primary.unique-p63RE	8.96933	CAGGCATGAACCATCTTGCCCAGA
chr3	181974103	181974664	18	chr3	181974416	181974435	+	primary.p53+p63RE	10.1081	GGTCATGTCAGGGCTTGAT
chr3	182052311	182052727	18	chr3	182052505	182052529	-	primary.unique-p63RE	9.84336	AGAAACAAGCCACAGCTTGCAGGA
chr3	183924736	183925427	18	chr3	183925107	183925131	+	primary.unique-p63RE	8.55216	CAAACATGTGCTGGCTGGTCTCAG
chr3	184651740	184652333	18	chr3	184652036	184652060	-	primary.unique-p63RE	9.38333	TGAAACGTGCTGCGGCTTGTTCCT
chr3	184760282	184760881	18	chr3	184760511	184760530	-	primary.p53+p63RE	10.3688	TCAAGTCCAGGCAGGTCCA
chr3	186922745	186923460	18	chr3	186923012	186923031	-	primary.p53+p63RE	11.9388	ACATGTTCAGGCATGGTTG
chr3	192850266	192851048	18	chr3	192850556	192850580	+	primary.unique-p63RE	8.68554	CTATCAAGTCCCTGCCTGCACAGG
chr3	196135908	196136799	18	chr3	196136595	196136614	-	primary.p53+p63RE	12.6307	GCTTGTCCAGGCATGTACA
chr3	196320066	196320549	18	chr3	196320243	196320262	-	primary.p53+p63RE	12.7359	ACAAGCCCAGGCAAGCTTC
chr4	3385363	3386342	18	chr4	3385680	3385699	+	primary.p53+p63RE	10.2828	TGACTTGTCTGTTCTTGTC
chr4	8188757	8189250	18	chr4	8188991	8189010	+	primary.p53+p63RE	9.38419	GGGCAAGTCCGTGCCTGCT
chr4	8205992	8206537	18	chr4	8206276	8206295	+	primary.p53+p63RE	10.8843	TGGCATGCCTGGGCAGGAA
chr4	13944157	13944556	18	chr4	13944364	13944388	+	primary.unique-p63RE	9.56703	CCAACAGGCACTGGCATGCCGGCA
chr4	26779276	26780119	18	chr4	26779779	26779803	+	primary.unique-p63RE	8.95112	TTGGCAGGACTGAACATGAACTAT
chr4	38128824	38129429	18	chr4	38129039	38129058	-	primary.p53+p63RE	10.3045	TCATGTCAGAGCTTGTTAG
chr4	49120485	49121204	18	-	-	-		Other	0	-
chr4	52051588	52052304	18	chr4	52051956	52051975	+	primary.p53+p63RE	12.1497	GGACATGTGTGTACATGCC
chr4	52911746	52912096	18	chr4	52911909	52911933	+	primary.unique-p63RE	9.63363	AGAACAGGCAGGAACTTGCTTCTC
chr4	53917666	53918231	18	chr4	53917890	53917909	+	primary.p53+p63RE	9.99187	GAGCAAGACCCAGCATGTT
chr4	74886470	74886917	18	chr4	74886684	74886703	-	primary.p53+p63RE	14.9502	ACATGTCTGGACATGTTTG
chr4	76388256	76388918	18	chr4	76388627	76388646	-	primary.p53+p63RE	13.9188	GCATGTCCAGACATGCACA
chr4	84606636	84607117	18	chr4	84606821	84606840	+	primary.p53+p63RE	10.1002	AGGCATGAGCCAACATGCC
chr4	127783204	127783795	18	chr4	127783508	127783527	+	primary.p53+p63RE	11.2865	AAACATGTTTCCACATGTT
chr4	151355152	151355514	18	chr4	151355329	151355353	-	primary.unique-p63RE	8.41099	GGGAGCGTGTGGTGACTTGCTGCA
chr4	152325862	152326313	18	chr4	152326158	152326182	-	primary.unique-p63RE	8.38866	CAAAACATGTAAACACTGGCCTGT
chr4	152634314	152634738	18	chr4	152634541	152634560	-	primary.p53+p63RE	10.9755	GCAAGCCTAGTCATGCACA
chr4	153023597	153024020	18	chr4	153023788	153023812	+	primary.unique-p63RE	9.50425	CCTGCATGTCCCCGCAGGCCCAGG
chr4	153748281	153748897	18	chr4	153748599	153748623	+	primary.unique-p63RE	9.23276	GATACAAGCTGGAGCAGGCTCCCA
chr4	158170927	158171621	18	chr4	158171354	158171373	+	primary.p53+p63RE	12.2323	CGGCTTGTCTGGACAGGTC
chr4	184417833	184418206	18	chr4	184418000	184418024	+	primary.unique-p63RE	9.97733	TCTGCAAGTGGATACATGCTGAAG
chr4	186368209	186368681	18	chr4	186368444	186368468	+	primary.unique-p63RE	9.2221	TTAACATGATGTGACTTGCCGGCT
chr4	187129016	187129374	18	chr4	187129193	187129217	-	primary.unique-p63RE	8.77364	CAGAGCGTGCACAGACCTGCACTT
chr4	188107894	188108340	18	chr4	188108103	188108122	+	primary.p53+p63RE	10.7139	TAACTTGTCTGGTCTTGTT
chr5	861359	861761	18	chr5	861552	861571	+	primary.p53+p63RE	10.4245	AGACAAGCACAGGCTTGCA
chr5	13143596	13144018	18	chr5	13143787	13143811	+	primary.unique-p63RE	8.81997	AGGGCAAGAATAGACAAGCTTTGC
chr5	14660253	14660632	18	chr5	14660438	14660462	-	primary.unique-p63RE	8.63406	GCTGGCGTGCAGGGGCATGATCAT
chr5	17228837	17229388	18	chr5	17229061	17229080	-	primary.p53+p63RE	9.49538	GCAAGCCCTGACCTGTTAG
chr5	33270618	33271045	18	chr5	33270854	33270873	+	primary.p53+p63RE	9.8185	ACGCAAGCCTTGACTTGTT
chr5	36442274	36442756	18	chr5	36442506	36442525	+	primary.p53+p63RE	14.3164	GGGCATGTCTGGGCAAGTC
chr5	36452103	36452798	18	chr5	36452481	36452505	+	primary.unique-p63RE	9.41253	CATACAGGTCTGAACAGGCTCTGT
chr5	49666713	49667199	18	-	-	-		Other	0	-
chr5	57835041	57835758	18	chr5	57835402	57835421	+	primary.p53+p63RE	11.8075	GGGCTTGCCCAGGCATGAT
chr5	67020849	67021459	18	chr5	67021205	67021229	+	primary.unique-p63RE	9.42047	GGTACAGGACAGAACATGTTGAAA
chr5	68950145	68950559	18	chr5	68950353	68950372	-	primary.p53+p63RE	10.1622	GCCTGTCAAGACAAGCCTC
chr5	71873312	71873745	18	chr5	71873529	71873548	+	primary.p53+p63RE	9.43634	GGTCAAGTCTGAACTTGTG
chr5	73236455	73237100	18	chr5	73236712	73236731	+	primary.p53+p63RE	13.5062	AGACATGTCTGCACATGTT
chr5	73565090	73565792	18	chr5	73565396	73565420	+	primary.unique-p63RE	8.07384	CCTCCAAGCCCGGGCTTGTTTTGG
chr5	73786047	73786780	18	chr5	73786552	73786576	+	primary.unique-p63RE	9.86106	CCCGCAGGCACAGACATGTCTCGA
chr5	82183863	82184303	18	chr5	82184048	82184072	-	primary.unique-p63RE	9.01715	CAATTCCTGCCCAGACTTGTTGGA
chr5	106730653	106731438	18	chr5	106731079	106731103	+	primary.unique-p63RE	9.51118	ACTGCCTGTGTGAACATGCACAGA
chr5	107456123	107456780	18	chr5	107456424	107456443	+	primary.p53+p63RE	11.7236	AGGCTTGTTCAAACATGCA
chr5	107568187	107568659	18	chr5	107568425	107568444	+	primary.p53+p63RE	12.2361	GGACATGCCTAGGCAGGTA
chr5	124132764	124133199	18	chr5	124132959	124132978	+	primary.p53+p63RE	12.252	TAACATGTCCTGACTTGCT
chr5	133041164	133041830	18	chr5	133041322	133041341	-	primary.p53+p63RE	10.1032	GCATGCAGGGGCCTGCCTA
chr5	135693315	135693866	18	chr5	135693505	135693519	+	secondary.p53+p63RE	9.13328	GTCCAGGCTTGCCA
chr5	139232122	139232598	18	chr5	139232397	139232416	-	primary.p53+p63RE	12.0869	GCATGTGTGGGCAAGTCTC
chr5	142720697	142721240	18	chr5	142720959	142720983	+	primary.unique-p63RE	8.80837	GCAGCCTGCCTCAACAGGCAAGTC
chr5	143142734	143143410	18	chr5	143143223	143143242	-	primary.p53+p63RE	10.1698	ACCTGTTCGGGCCTGCCAA
chr5	145247433	145247880	18	chr5	145247632	145247651	+	primary.p53+p63RE	11.0226	AGGCATGCCCAGGCCTGCA
chr5	149805760	149806340	18	chr5	149806043	149806062	-	primary.p53+p63RE	9.54617	ACAAGCCCAGGCTGGTGTG
chr5	150318677	150319156	18	chr5	150318891	150318910	-	primary.p53+p63RE	10.3349	CCATGTTAAAACATGTTCA
chr5	151628028	151628731	18	chr5	151628384	151628403	+	primary.p53+p63RE	9.58701	GGGCATGACCAGGCCTGCT
chr5	160422934	160423515	18	chr5	160423315	160423339	+	primary.unique-p63RE	9.27303	AGGGCAAGCAGCAGCTTGTTAGGT
chr5	163509223	163509816	18	chr5	163509456	163509480	-	primary.unique-p63RE	8.99555	CATCACTTGTTGGAACTTGTTGGG
chr6	7447018	7447399	18	chr6	7447195	7447219	+	primary.unique-p63RE	9.86824	GGAGCAAGATGGAACATGCATGCA
chr6	7479778	7480328	18	chr6	7479900	7479924	+	primary.unique-p63RE	7.88529	CCTGCAAGTTGCTGCCAGTGCAGG
chr6	7505316	7506148	18	chr6	7505700	7505724	+	primary.unique-p63RE	8.9553	TGATCAAGTCAGAACAGGTTTCCT
chr6	10136612	10136977	18	chr6	10136766	10136785	-	primary.p53+p63RE	9.4339	GCAGGCCAGGACAAGTCTG
chr6	12472634	12473104	18	chr6	12472846	12472870	+	primary.unique-p63RE	8.81911	ATTGCCTGCCCATACATGAAGAGG
chr6	13447991	13448371	18	chr6	13448138	13448162	+	primary.unique-p63RE	8.65544	GGAACAAGACCATGCTTGTTATAA
chr6	16251604	16252194	18	chr6	16251884	16251903	+	primary.p53+p63RE	10.7669	CAACATGCCTGCACTTGCT
chr6	30520946	30521593	18	chr6	30521200	30521219	+	primary.p53+p63RE	10.3156	TGGCATGCTGCAGCTTGTT
chr6	30690961	30691347	18	chr6	30691151	30691175	-	primary.unique-p63RE	8.9887	GGATGCGTGTCCCGGCCTGCTGTC
chr6	30889866	30890718	18	chr6	30890308	30890332	+	primary.unique-p63RE	8.41506	GGAACAAGCCAGGGCTCGTTCCCA
chr6	33834829	33835289	18	chr6	33835040	33835064	+	primary.unique-p63RE	8.24623	GCGGCGTGTCTGGACACGTGTGGT
chr6	36373564	36373994	18	chr6	36373667	36373681	+	tertiary.unique-p63RE	7.53386	AAGGGCTGGCATGT
chr6	41111041	41111591	18	chr6	41111267	41111291	-	primary.unique-p63RE	8.12487	CCAGACGAGTGTGCACATGCCCTG
chr6	42326147	42326745	18	chr6	42326418	42326437	-	primary.p53+p63RE	10.6258	ACTTGTGAGGGCATGTTTG
chr6	42890214	42891369	18	chr6	42891029	42891053	-	primary.unique-p63RE	8.52365	ACGGACGTGCCAAAACTTGAAGGC
chr6	43733952	43734496	18	chr6	43734227	43734246	-	primary.p53+p63RE	9.82733	ACAGGCTGGGGCAAGCCAG
chr6	44685127	44685605	18	chr6	44685409	44685428	-	primary.p53+p63RE	12.0178	ACACGTCCAGGCATGTCTG
chr6	47700034	47700611	18	chr6	47700308	47700322	+	tertiary.unique-p63RE	7.69766	GTGTTCAGACGGGT
chr6	56220060	56220448	18	chr6	56220230	56220249	+	primary.p53+p63RE	9.53538	AGGCCAGCCAGGACTTGTA
chr6	85406518	85407158	18	chr6	85406910	85406934	-	primary.unique-p63RE	8.49753	CTCTACGTGCCAGATCATGTTCTA
chr6	87944586	87945036	18	chr6	87944763	87944787	+	primary.unique-p63RE	8.05675	AGTGCAAGTCACGGCTAGACAGAG
chr6	89035325	89036124	18	chr6	89035702	89035721	+	primary.p53+p63RE	9.64153	AGACATGACTCAGCACGCC
chr6	107813536	107814168	18	chr6	107813720	107813744	+	primary.unique-p63RE	8.29401	AAAACAAGTTCAAACTTGGTAGCT
chr6	108589331	108589869	18	chr6	108589570	108589594	-	primary.unique-p63RE	7.77212	GGTTTCCAGTGCAGACTTGCAGGT
chr6	111987172	111987696	18	chr6	111987506	111987525	+	primary.p53+p63RE	11.9362	AGGCATGTCAGGGCCTGTC
chr6	122800270	122800679	18	chr6	122800463	122800487	+	primary.unique-p63RE	9.84638	TGTGCAGGCTCAAACCTGCCTTTG
chr6	149900421	149900917	18	chr6	149900673	149900697	+	primary.unique-p63RE	8.91373	TGTGCAGGTTACAACTGGCCCAAT
chr6	150250735	150251199	18	chr6	150251012	150251031	-	primary.p53+p63RE	10.8336	CCATGTCCAGGCTTGTCTC
chr6	150255707	150256395	18	chr6	150255709	150255733	+	primary.unique-p63RE	9.23038	CAGACAGGCATGAGCATGTGTGGG
chr6	157029921	157030604	18	chr6	157030245	157030264	+	primary.p53+p63RE	11.3952	AAGCTAGTCTGGGCTTGTT
chr6	161033589	161034111	18	chr6	161033827	161033851	+	primary.unique-p63RE	9.45162	AGAGCAGGACTGAACTTGCCCACT
chr6	161486146	161486695	18	chr6	161486446	161486470	+	primary.unique-p63RE	8.39638	GGAACGTGTTCTGACAAGCAGTGG
chr6	170224463	170225191	18	chr6	170224649	170224673	-	primary.unique-p63RE	8.85746	GCAGGCAGGTCGCTACCTGTCAGC
chr7	485362	485825	18	chr7	485618	485642	+	primary.unique-p63RE	7.82446	AGGACAGGCTGTGACTCGCCAGGC
chr7	539805	540238	18	chr7	540032	540051	-	primary.p53+p63RE	9.76395	GCAAGCCCAGGCTAGATCC
chr7	2471235	2471768	18	chr7	2471525	2471544	+	primary.p53+p63RE	12.0483	GGGCTTGTCAGTGCATGTC
chr7	5608057	5608827	18	chr7	5608177	5608191	-	secondary.p53+p63RE	7.96938	GACCTGCCCAGGCC
chr7	6403925	6404579	18	chr7	6404156	6404175	+	primary.p53+p63RE	9.94888	ATTCATGTTTGGACCTGTC
chr7	12851107	12851515	18	chr7	12851325	12851349	+	primary.unique-p63RE	9.26223	GATTCAAGCAGTAACATGCCCTCA
chr7	16421318	16422384	18	chr7	16421949	16421973	+	primary.unique-p63RE	8.55315	GGAGCGTGTCCTGACACGCTCAGA
chr7	18420701	18421215	18	chr7	18420986	18421005	+	primary.p53+p63RE	13.8918	GGGCATGCCTAGACATGCA
chr7	32415739	32416514	18	chr7	32416145	32416169	+	primary.unique-p63RE	8.95702	CTGACAGGTGCTGACATGTAAGGG
chr7	45033580	45034299	18	chr7	45034034	45034053	-	primary.p53+p63RE	12.6874	TCATGTCCAAACTTGTCCT
chr7	47291114	47292026	18	chr7	47291612	47291631	-	primary.p53+p63RE	11.2787	ACTTGTTGAGTCATGTCTC
chr7	55774664	55775114	18	chr7	55774852	55774871	-	primary.p53+p63RE	10.3965	GCAGGACCAGGCATGCCAG
chr7	56009613	56010119	18	chr7	56009912	56009931	+	primary.p53+p63RE	10.3965	TGGCATGCCTGGTCCTGCC
chr7	75527805	75528394	18	chr7	75528132	75528151	+	primary.p53+p63RE	9.53714	GCGCATGCCCGAACACGCA
chr7	80134389	80134781	18	-	-	-		Other	0	-
chr7	95691314	95691958	18	chr7	95691647	95691666	+	primary.p53+p63RE	9.99319	GAACATGTACGTACAGGTA
chr7	97130363	97130773	18	chr7	97130527	97130551	-	primary.unique-p63RE	10.1117	TTGTTCATGTTACAGCTTGTTCAT
chr7	98034329	98034778	18	chr7	98034585	98034609	+	primary.unique-p63RE	8.32402	TTTGCAAGTGCTAACTCGTTCCTG
chr7	101108922	101109590	18	chr7	101109292	101109306	-	tertiary.unique-p63RE	8.28646	CAGGTCTGGGCGGG
chr7	101126205	101127202	18	chr7	101126943	101126962	+	primary.p53+p63RE	10.9043	ACACATGCCTCAGCAAGTC
chr7	101426421	101427114	18	chr7	101426806	101426830	+	primary.unique-p63RE	8.94458	GAAGCAGGTCCCAGCACGTCAGCC
chr7	101792281	101792696	18	chr7	101792481	101792505	-	primary.unique-p63RE	8.37964	GTGAACAAGTTGATTCAAGTATCT
chr7	115585093	115585780	18	chr7	115585418	115585437	+	primary.p53+p63RE	12.3721	AGACATGCCTAGGCCTGCC
chr7	116500488	116501022	18	chr7	116500765	116500779	+	tertiary.unique-p63RE	6.381	CTGTTGTGACTCGT
chr7	117273960	117274343	18	chr7	117274153	117274172	+	primary.p53+p63RE	9.53751	GCGCATGCACGGTCATGTT
chr7	118754998	118755614	18	chr7	118755311	118755330	-	primary.p53+p63RE	10.7126	GCATGCACAGTCATGCAAA
chr7	126589145	126589838	18	chr7	126589489	126589503	+	secondary.p53+p63RE	8.46231	GCTCAGACATGTCT
chr7	132239503	132240000	18	chr7	132239806	132239825	+	primary.p53+p63RE	9.9799	AGACAAGACTGGGCACGTT
chr7	143318665	143319053	18	chr7	143318854	143318878	-	primary.unique-p63RE	8.95564	CAATTCATGTGCGTGCTTGTTCAG
chr7	151116160	151116600	18	chr7	151116501	151116525	-	primary.unique-p63RE	8.0587	ATAAACCTGCTGGAGCAGGAAGAG
chr7	151688087	151688615	18	chr7	151688263	151688282	+	primary.p53+p63RE	14.2554	GAGCATGTCTGAACATGTT
chr7	151696208	151696700	18	chr7	151696480	151696504	+	primary.unique-p63RE	9.39298	TCTGCAGGCCCAGGCCTGCCGGCG
chr7	151895113	151895924	18	chr7	151895402	151895421	+	primary.p53+p63RE	9.76343	CAACAGGCCTCAACATGTT
chr7	155951499	155952011	18	chr7	155951572	155951581	-	quinary.p53+p63RE	6.64686	ACATGCCCA
chr7	158818472	158819176	18	chr7	158818956	158818975	-	primary.p53+p63RE	9.83981	TCATGTCCAGACAAGGACA
chr8	19041399	19041939	18	chr8	19041719	19041738	+	primary.p53+p63RE	10.0189	GGATGTGTCCAGACATGTT
chr8	22140609	22141332	18	chr8	22140883	22140907	-	primary.unique-p63RE	9.22621	CCAAGCCTGCCCAGGCCTGCACCG
chr8	22718886	22719605	18	chr8	22719308	22719327	-	primary.p53+p63RE	11.224	GCAAGCTGTGGCATGTCCT
chr8	25078476	25079011	18	chr8	25078669	25078693	+	primary.unique-p63RE	8.06968	CCCACAAGATCAGGCACGTTTGAG
chr8	27361770	27362439	18	chr8	27362096	27362115	-	primary.p53+p63RE	11.6103	ACCTGTCTGGGCAGGCCTG
chr8	38936952	38937443	18	chr8	38937331	38937345	+	secondary.p53+p63RE	8.84055	GCCCAGGCCTGCCC
chr8	41818683	41819360	18	chr8	41818920	41818939	+	primary.p53+p63RE	13.292	TAACTTGCCCAGACATGCC
chr8	42265649	42266415	18	chr8	42266134	42266158	+	primary.unique-p63RE	10.1972	GAAGCAAGTCCTGACCTGCAGAGT
chr8	47381432	47381967	18	chr8	47381619	47381643	+	primary.unique-p63RE	7.84235	CGGGCAGGTCTGGGCCTGGTCAGT
chr8	47823025	47823490	18	chr8	47823194	47823213	-	primary.p53+p63RE	12.6763	GCATGTTGGTGCATGCCTG
chr8	48501216	48501877	18	chr8	48501378	48501397	+	secondary.unique-p63RE	8.97632	ATCTGTACTGACACGTCCA
chr8	48522209	48523019	18	chr8	48522692	48522716	+	primary.unique-p63RE	10.1021	GCTGCAAGTCAGAGCATGCGGCAG
chr8	48708914	48709518	18	chr8	48709274	48709298	+	primary.unique-p63RE	9.22851	GGTGCAGGCCCTGGCCTGCTCCAC
chr8	52629267	52629797	18	chr8	52629559	52629578	+	primary.p53+p63RE	11.186	GGACTTGCCTCATCATGTC
chr8	53529034	53529868	18	chr8	53529477	53529501	-	primary.unique-p63RE	8.24516	GAGGGCGAGACCAGACTTGCAGTA
chr8	67380616	67381317	18	chr8	67380709	67380733	+	primary.unique-p63RE	8.83137	CCGACAGGCCACTGCATGTGGGGT
chr8	93519086	93519654	18	chr8	93519457	93519476	-	primary.p53+p63RE	10.1477	ACAAGCCCAGGCATACATA
chr8	100567209	100567744	18	chr8	100567527	100567551	-	primary.unique-p63RE	8.5327	GAGGACGAGTTTCAGCCTGCTGCT
chr8	100678636	100679324	18	chr8	100678932	100678956	-	primary.unique-p63RE	9.9619	TTAGACATGTGGCTGCTTGTTTGT
chr8	101245237	101245912	18	chr8	101245515	101245534	+	primary.p53+p63RE	10.759	ATGCAAGCCTGGACTAGCC
chr8	101436985	101437633	18	chr8	101437348	101437372	-	primary.unique-p63RE	8.58943	TGGGTCTGGTCCAAACATGCGCAT
chr8	101891661	101892076	18	chr8	101891951	101891965	+	secondary.p53+p63RE	8.89903	GCCCAGGCTTGCTT
chr8	102721571	102722057	18	chr8	102721798	102721817	-	primary.p53+p63RE	10.8892	TCAGGTCTGGACATGCTCA
chr8	103120224	103120742	18	chr8	103120473	103120497	-	primary.unique-p63RE	9.53519	AGTGGCAGGTCTGTGCTTGCATCC
chr8	106608419	106609112	18	chr8	106608700	106608719	-	primary.p53+p63RE	11.4276	ACAGGCCCAAACATGCTTT
chr8	121155186	121155795	18	chr8	121155513	121155537	+	primary.unique-p63RE	8.21918	AGAACAAGTCCTGACCCGTGTAAC
chr8	123708379	123708876	18	chr8	123708607	123708626	-	primary.p53+p63RE	9.6034	GCCTGCCTGAGCAAGTCAC
chr8	126844996	126845540	18	chr8	126845333	126845357	+	primary.unique-p63RE	8.57017	AGGGCCTGTTGGAACAAGCGTGAG
chr8	130904478	130904969	18	chr8	130904662	130904686	-	primary.unique-p63RE	9.29667	GTGGACATGTGCAGGCTGGCAGCT
chr8	133328454	133329129	18	chr8	133328868	133328887	-	primary.p53+p63RE	9.82544	GCATGCAGAGGCAGGCCTG
chr8	134691104	134691783	18	chr8	134691491	134691515	-	primary.unique-p63RE	8.84731	GGCAGCTTGTTCTGGCCTGCAGGC
chr8	143836295	143836698	18	chr8	143836557	143836581	-	primary.unique-p63RE	9.0291	GTTTGCCTGTTAGGACATGAATTC
chr9	470156	470554	18	chr9	470317	470341	-	primary.unique-p63RE	8.76961	GCGGGCGTGCTCCAGCCTGCTCAG
chr9	5629471	5629986	18	chr9	5629744	5629758	+	secondary.p53+p63RE	8.98147	GCCCAGACTTGTTC
chr9	19404131	19404769	18	chr9	19404386	19404410	-	primary.unique-p63RE	9.23922	ATCTACAAGTCTGAGCCTGAAAAC
chr9	36858750	36859288	18	chr9	36858935	36858959	-	primary.unique-p63RE	8.34354	CAGTGCTAGTCCCGACCTGCGCTG
chr9	38500157	38500589	18	chr9	38500335	38500359	+	primary.unique-p63RE	8.50594	AGCACAGGCAGCAACTTGCTCTGA
chr9	77158618	77159325	18	chr9	77158973	77158997	-	primary.unique-p63RE	8.38473	GGGATCAAGTTCCTTCTTGCCATT
chr9	90921062	90921565	18	chr9	90921267	90921291	-	primary.unique-p63RE	8.12003	TTCCTCCTGTCCTCACATGCTGCA
chr9	92715585	92716340	18	chr9	92715904	92715928	+	primary.unique-p63RE	9.06508	TAAGCAGGACTGGGCTTGTTCCCA
chr9	93224598	93225091	18	chr9	93224892	93224916	-	primary.unique-p63RE	8.54898	TTCTTCCTGCCCTGGCTTGTTGAC
chr9	106860148	106860649	18	chr9	106860333	106860347	-	tertiary.unique-p63RE	6.53412	CGTGTTGGGGCGCG
chr9	114278674	114279268	18	chr9	114278995	114279009	+	tertiary.unique-p63RE	6.96699	ACGTCCCAGCAAGT
chr9	115036250	115037154	18	chr9	115036742	115036761	-	primary.p53+p63RE	10.2983	GCCTGCTGGGTCATGTCCA
chr9	130532433	130532922	18	chr9	130532572	130532591	+	primary.p53+p63RE	9.73144	AGGCATGAGCCAGCATGCC
chr9	132027920	132028401	18	chr9	132028202	132028226	-	primary.unique-p63RE	10.1791	TTGTGCAAGTCTCAACTTGAACTT
chr9	132923383	132923944	18	chr9	132923743	132923767	-	primary.unique-p63RE	8.45193	GGAGACGAGTTCAAACTTGACTTG
chr9	133133298	133134217	18	chr9	133133790	133133814	+	primary.unique-p63RE	8.69102	CACACAAGCCCAGGCTAGCAAAAC
chr9	133873951	133874676	18	chr9	133874227	133874251	+	primary.unique-p63RE	8.36256	TAAACCTGTCCCAGCAAGACTGGC
chr9	134323790	134324613	18	chr9	134324163	134324187	-	primary.unique-p63RE	8.73732	CCTGGCGTGTCCTGACCTGCCGTC
chr9	134371550	134372289	18	chr9	134371805	134371819	-	tertiary.unique-p63RE	6.56775	CAGGGCCGGGCCTG
chr9	135951904	135952490	18	chr9	135952090	135952114	+	primary.unique-p63RE	8.58341	GGGACAGGCGGAGGCAGGCCCAGA
chr9	137273961	137274384	18	chr9	137274187	137274211	-	primary.unique-p63RE	9.79852	CTGAGCAGGTTGGGACCTGTTGGG
chrGL000225.1	67157	67695	18	-	-	-		Other	0	-
chrKI270466.1	205	1233	18	-	-	-		Other	0	-
chrMT	2051	3902	18	-	-	-		Other	0	-
chrMT	14753	16563	18	-	-	-		Other	0	-
chrX	22122586	22123016	18	chrX	22122809	22122828	-	primary.p53+p63RE	10.6196	-
chrX	44675269	44675862	18	chrX	44675534	44675553	-	primary.p53+p63RE	11.7558	-
chrX	100895668	100896185	18	chrX	100895928	100895947	-	primary.p53+p63RE	9.29437	-
chrX	106672421	106672963	18	chrX	106672742	106672756	+	tertiary.unique-p63RE	8.58924	-
chrX	120260365	120260867	18	chrX	120260605	120260624	-	primary.p53+p63RE	10.9791	-
chrX	130111112	130111717	18	chrX	130111360	130111384	+	primary.unique-p63RE	9.91541	-
chrX	150694230	150694892	18	chrX	150694526	150694550	-	primary.unique-p63RE	9.17376	-
chr1	1025694	1026329	17	chr1	1025924	1025948	+	primary.unique-p63RE	8.26571	CCTGCGTGAATGGACTTGTCCCGT
chr1	6258602	6259050	17	chr1	6258796	6258820	+	primary.unique-p63RE	8.05937	TGAACAAGCTCTGTCTAGCCCCGT
chr1	9181862	9182527	17	chr1	9182145	9182164	-	primary.p53+p63RE	12.7227	ACAAGCCCAGGCAAGCCCA
chr1	10063850	10064283	17	chr1	10064033	10064052	+	primary.p53+p63RE	9.52991	GAGCTTGTTGCAGCTTGTC
chr1	10495958	10496375	17	chr1	10496146	10496160	-	tertiary.unique-p63RE	6.95386	CGGGTATGAACACG
chr1	10899719	10900166	17	chr1	10899996	10900010	+	secondary.p53+p63RE	8.30409	GCCCTGCCCTGCCC
chr1	17460345	17460902	17	chr1	17460571	17460595	-	primary.unique-p63RE	8.23597	TCCACCAAGTTCAAACCTGCTTTT
chr1	23377211	23377745	17	chr1	23377551	23377575	-	primary.unique-p63RE	7.88199	GTGGACTTGAGCTGACTTGTTCTT
chr1	25042356	25042788	17	chr1	25042556	25042580	+	primary.unique-p63RE	8.95212	CAGGCAGGTTCCAACAAGTGTTGA
chr1	25194326	25194925	17	chr1	25194658	25194682	-	primary.unique-p63RE	8.1551	AGGGCCCTGTCCCTGCATGTCCAT
chr1	25568215	25568726	17	chr1	25568463	25568482	-	primary.p53+p63RE	10.8801	GCTTGTCGGAGCAAGTTTC
chr1	26328001	26328377	17	chr1	26328153	26328172	-	primary.p53+p63RE	10.4617	GCCTGCCCAGACACGCTCA
chr1	26854960	26855324	17	chr1	26855126	26855145	+	primary.p53+p63RE	10.67	GGACCTGCCCAGACAGGCT
chr1	28884647	28885254	17	chr1	28885083	28885107	-	primary.unique-p63RE	7.93831	CTTATCAGGCTGGGGCAGGCACTG
chr1	29576498	29576966	17	chr1	29576659	29576678	+	primary.p53+p63RE	9.31304	GGGCATGCTCGGGCCTGAA
chr1	31047527	31047979	17	chr1	31047800	31047819	-	primary.p53+p63RE	11.9128	GCATGTTGGCACATGCCTG
chr1	32179734	32180324	17	chr1	32180130	32180149	+	primary.p53+p63RE	9.42136	AAGCCTGCCCCGGCACGTC
chr1	32989118	32989573	17	chr1	32989190	32989214	-	primary.unique-p63RE	8.75238	TCAAGCCTGTTCATACAGGCATGC
chr1	39601914	39602360	17	chr1	39602081	39602100	+	primary.p53+p63RE	9.31411	AGGCGTGCTGGCACATGCC
chr1	40315234	40315600	17	chr1	40315394	40315418	-	primary.unique-p63RE	9.10723	CTCCGCATGTCAGGGCTGGTTTGA
chr1	41323233	41323602	17	chr1	41323405	41323424	-	primary.p53+p63RE	11.0516	ACATGTTCCAACATGTGCA
chr1	43885155	43885837	17	chr1	43885459	43885473	-	tertiary.unique-p63RE	6.62483	CGGGCTGGGGCCTG
chr1	48869409	48869759	17	chr1	48869587	48869606	+	primary.p53+p63RE	9.93021	AGACAGGCCTGGGCTTGTG
chr1	51592566	51593181	17	chr1	51592854	51592873	-	primary.p53+p63RE	10.5726	GCAGGTCTGTGCATGTTCT
chr1	51828997	51829396	17	chr1	51829204	51829223	+	primary.p53+p63RE	10.6472	AGGCATGTACCATCATGCC
chr1	54323314	54323893	17	chr1	54323497	54323521	-	primary.unique-p63RE	8.06057	AGCCTCCTGTCCTGGCCTGCTCAT
chr1	54542119	54542979	17	chr1	54542579	54542603	+	primary.unique-p63RE	9.07395	CTTGCAGGCTGGGGCATGAAGCAC
chr1	59329340	59329737	17	chr1	59329545	59329564	+	primary.p53+p63RE	10.0199	TGGCCTGTCTCGACTTGCA
chr1	59673428	59674225	17	chr1	59674028	59674047	-	primary.p53+p63RE	10.3542	TCCTGCGCAGGCATGCCTG
chr1	61338179	61338869	17	chr1	61338673	61338692	+	primary.p53+p63RE	9.8194	GAACAAGCCCAAACTTGAA
chr1	65177414	65177976	17	chr1	65177684	65177708	+	primary.unique-p63RE	9.25243	GGAGCAAGCATCCACTTGTTGGGA
chr1	67575718	67576330	17	chr1	67576025	67576049	+	primary.unique-p63RE	9.55542	CCAGCAGGCAAGGGCATGTTTCAT
chr1	94103531	94104145	17	chr1	94103834	94103853	-	primary.p53+p63RE	11.3896	ACATGCCGGGGCTTGCCTG
chr1	107677706	107678083	17	chr1	107677871	107677890	-	primary.p53+p63RE	10.9832	GCATGCACAGACCTGCCAG
chr1	109209960	109210705	17	chr1	109210278	109210297	-	primary.p53+p63RE	9.79803	ACAGGACCGGACTTGTTCG
chr1	109240455	109241068	17	chr1	109240840	109240864	+	primary.unique-p63RE	8.14149	ACTGCGTGTCGGAGCCTGTGCCGG
chr1	111592874	111593444	17	chr1	111593218	111593227	+	quinary.p53+p63RE	7.67121	AGACAAGTC
chr1	114336336	114336747	17	chr1	114336516	114336535	+	primary.p53+p63RE	11.67	GAACATGTCGCTGCATGCC
chr1	116720359	116720739	17	chr1	116720538	116720557	+	primary.p53+p63RE	9.30743	AAACAAGTCTGTTCATGAT
chr1	143231810	143232335	17	-	-	-		Other	0	-
chr1	143253093	143253592	17	chr1	143253209	143253223	-	senary.unique-p63RE	6.53607	ACGATGATGATTGC
chr1	143256030	143256394	17	-	-	-		Other	0	-
chr1	149995832	149996355	17	chr1	149996113	149996137	+	primary.unique-p63RE	7.86194	GCTACAAGAAAGAACCTGCAAGCA
chr1	150537981	150538297	17	chr1	150538109	150538133	-	primary.unique-p63RE	8.28856	CACCTCCTGCCTCAACTTGCATTT
chr1	152182954	152183557	17	chr1	152183215	152183239	+	primary.unique-p63RE	8.95285	GCTTCAAGTTGCTACAAGTTCACT
chr1	152191184	152191779	17	chr1	152191460	152191484	-	primary.unique-p63RE	9.25404	CCCTTCATGCCTACACTTGCTGGG
chr1	152367375	152367820	17	chr1	152367560	152367579	-	primary.p53+p63RE	9.97937	GCAAGTTGAGGCAGGTACA
chr1	152502600	152503267	17	chr1	152503005	152503024	+	primary.p53+p63RE	9.81702	GAGCATGACTGAGCAGGCT
chr1	152739782	152740173	17	chr1	152739969	152739993	+	primary.unique-p63RE	9.21222	AATGCAAGTTTAAACTCGTCAGTC
chr1	152953739	152954158	17	chr1	152953952	152953966	-	tertiary.unique-p63RE	6.95883	CAGGTTTGTACGTG
chr1	153567509	153568045	17	chr1	153567660	153567679	+	primary.p53+p63RE	10.3914	GAACGTGCCCACACATGCC
chr1	154196946	154197421	17	chr1	154197083	154197107	-	primary.unique-p63RE	9.20054	CCATACTTGTCGTTACTTGTTCAG
chr1	154391123	154391910	17	chr1	154391496	154391515	+	primary.p53+p63RE	10.955	AGGCATGAATCAACATGCC
chr1	155125201	155125850	17	chr1	155125564	155125588	+	primary.unique-p63RE	8.69437	CCAGCGAGCCCGAACCTGCCTGGC
chr1	160414811	160415187	17	chr1	160414968	160414987	-	primary.p53+p63RE	10.6506	GCAAGTAGAAACTTGTCTT
chr1	172476207	172476691	17	chr1	172476412	172476426	+	tertiary.unique-p63RE	8.06513	ACGTCCTGGCATGA
chr1	175222100	175222652	17	chr1	175222397	175222416	-	primary.p53+p63RE	11.6127	ACATGTCTGGGCATCTCTG
chr1	180953358	180953741	17	chr1	180953537	180953551	-	tertiary.unique-p63RE	7.26828	CAGGTGAGCACAAG
chr1	181032990	181033683	17	chr1	181033282	181033306	-	primary.unique-p63RE	8.463	TCTTTCCTGTCTGGGCCTGTTCCC
chr1	182101287	182101824	17	chr1	182101482	182101506	-	primary.unique-p63RE	9.57704	GGACACAGGCTGGAGCATGCCTGT
chr1	182604365	182604922	17	chr1	182604760	182604779	+	primary.p53+p63RE	10.2587	AGGCAAGTCTGAGCCTGCT
chr1	183954517	183954906	17	chr1	183954678	183954697	-	primary.p53+p63RE	9.39455	GCAAGCTCAGGCTTGTGTT
chr1	184424199	184424822	17	chr1	184424354	184424373	+	secondary.unique-p63RE	10.2087	ATAAGTTGTGACTTGCCTA
chr1	186927696	186928487	17	chr1	186928024	186928043	+	primary.p53+p63RE	9.71994	GAGCAGGCCTGGGCTTGCA
chr1	192901511	192901910	17	chr1	192901703	192901722	-	primary.p53+p63RE	11.4907	GCAAGCCAAGGCATGCCAA
chr1	195958108	195958534	17	chr1	195958346	195958370	-	primary.unique-p63RE	8.04015	GTAGGCGTGTGCTTGCTTGTTTGA
chr1	200095105	200095497	17	chr1	200095259	200095278	-	primary.p53+p63RE	10.069	GCATGTGCCATCATGCCTG
chr1	200659238	200659760	17	chr1	200659497	200659521	-	primary.unique-p63RE	9.0656	TGGGGCAGGCTGAGGCAGGCACCA
chr1	201475950	201477104	17	chr1	201476972	201476996	-	primary.unique-p63RE	9.12544	TGGTTCAGGTTGGGGCCTGCAGAA
chr1	202222323	202222737	17	chr1	202222531	202222550	-	secondary.unique-p63RE	8.96929	GTTCCTGTCGAGACACATC
chr1	202836364	202836915	17	chr1	202836649	202836673	-	primary.unique-p63RE	9.15987	TCAGACAGGCTCAGGCAGGCAGGA
chr1	202844177	202844664	17	chr1	202844447	202844466	+	primary.p53+p63RE	10.0565	GAACCTGCCCAGACTTGAT
chr1	203625529	203625959	17	chr1	203625761	203625785	-	primary.unique-p63RE	9.76635	TGGTGCATGTTTGTGCTTGAAAGC
chr1	203650285	203650891	17	chr1	203650620	203650634	-	tertiary.unique-p63RE	7.3803	CAGGTCCGAACTCG
chr1	204915740	204916409	17	chr1	204915992	204916016	-	primary.unique-p63RE	9.53579	TCCGACATGCTGCGTCCTGCCTTT
chr1	206961580	206962090	17	chr1	206961875	206961894	+	primary.p53+p63RE	11.8904	CTGCATGTCTGAACATGCA
chr1	208238776	208239204	17	chr1	208238956	208238975	-	primary.p53+p63RE	10.1629	ACCTGTTGGGGCAGGCCTC
chr1	209411417	209412113	17	chr1	209411824	209411843	-	primary.p53+p63RE	10.6589	ACATGTTATGTCATGCCCT
chr1	209430871	209431611	17	chr1	209431192	209431206	-	secondary.p53+p63RE	9.10562	GGCATGTCTGAACA
chr1	212596224	212596914	17	chr1	212596564	212596583	-	primary.p53+p63RE	12.3271	ACATGTCAGGACATGTAAC
chr1	225922141	225922922	17	chr1	225922559	225922583	-	primary.unique-p63RE	8.46063	CTGGACAAGTAAGCACAGGCTTGG
chr1	226083818	226084328	17	chr1	226083860	226083874	+	tertiary.unique-p63RE	7.76788	TGGCCCAGCCATGC
chr1	226658149	226658497	17	chr1	226658320	226658339	+	primary.p53+p63RE	9.94158	GTACAAGCCCAGGCAGGTA
chr1	227946257	227946806	17	chr1	227946334	227946348	+	secondary.p53+p63RE	9.09398	GCCTGGACAAGCCC
chr1	234656975	234657753	17	chr1	234657587	234657611	+	primary.unique-p63RE	9.17981	AGGACAGGCTTAAACAGGTTTGTA
chr1	236465830	236466497	17	chr1	236466202	236466226	-	primary.unique-p63RE	8.42798	ACATACCTGCCCGATCCTGCAGGA
chr1	241688677	241689275	17	chr1	241688934	241688953	+	primary.p53+p63RE	10.8208	AAACGTGCCAGAACATGTT
chr1	244735333	244735833	17	chr1	244735616	244735635	-	primary.p53+p63RE	14.3164	ACTTGCCCAGACATGCCCG
chr10	1600782	1601344	17	chr10	1601079	1601098	-	primary.p53+p63RE	10.0271	ACAAGTTCAGACAGGTTTG
chr10	4250008	4250583	17	chr10	4250363	4250382	+	primary.p53+p63RE	11.1013	TAGCATGTGTCAACATGTC
chr10	5538627	5539517	17	chr10	5539078	5539097	-	primary.p53+p63RE	10.7531	ACAAGCAGGGGCATGTAAG
chr10	6219004	6219472	17	chr10	6219275	6219294	+	quartenary.uniuqe-p63RE	15.53	GACAGATCCTGACTTGCTG
chr10	8594271	8594723	17	chr10	8594474	8594493	+	primary.p53+p63RE	10.8713	ATGCTTGTGTGAACATGTC
chr10	11884548	11885145	17	chr10	11884871	11884890	-	primary.p53+p63RE	10.7608	GCCAGCCTGGACAAGCCAG
chr10	13758330	13758703	17	chr10	13758535	13758554	-	primary.p53+p63RE	9.41414	TCTTGCCCGGGCGTGCCTG
chr10	18627642	18628002	17	chr10	18627846	18627860	+	secondary.p53+p63RE	8.89903	GCCCAGGCTTGCTT
chr10	24756259	24756761	17	chr10	24756480	24756499	-	primary.p53+p63RE	13.5225	GCAAGTCCAGGCTTGCCTG
chr10	42640814	42641233	17	chr10	42641035	42641054	+	primary.p53+p63RE	12.0547	GGACTTGTCTGGGCATGGC
chr10	43025977	43026608	17	chr10	43026293	43026317	-	primary.unique-p63RE	9.65074	TAGCACAAGTTCAGACATGAAACC
chr10	47396194	47396815	17	chr10	47396417	47396436	+	primary.p53+p63RE	11.9178	TATCTTGCCTGGGCATGTC
chr10	52443412	52444085	17	chr10	52443631	52443655	+	primary.unique-p63RE	9.25673	AGAACATGTAGTCACTTGTTCAGT
chr10	61902642	61903487	17	chr10	61903029	61903053	+	primary.unique-p63RE	8.39615	GTAACAGGCACAAACACGTTAAGC
chr10	62027928	62028568	17	chr10	62028259	62028278	-	primary.p53+p63RE	9.3003	ACGAGCTTGGGCTTGTTTG
chr10	69340689	69341111	17	chr10	69340931	69340955	-	primary.unique-p63RE	8.89489	TCACACATGCCCTTGCTTGTGCCT
chr10	71868138	71868548	17	chr10	71868311	71868335	-	primary.unique-p63RE	9.1438	CACTGCAAGCCACAGCCTGCAGCT
chr10	71888856	71889521	17	chr10	71889165	71889189	-	primary.unique-p63RE	8.44809	ACGAACGGGTTGGGGCATGCGCGG
chr10	72298067	72298830	17	chr10	72298368	72298387	-	primary.p53+p63RE	12.9244	ACAAGTCCCAGCATGCCCA
chr10	73887644	73888233	17	chr10	73887901	73887915	-	secondary.p53+p63RE	10.4736	GACATGCCAGGGCA
chr10	75429995	75430413	17	chr10	75430199	75430223	+	primary.unique-p63RE	8.27263	TGGGCCTGTTTCCACAAGTCCTCT
chr10	78950935	78951343	17	chr10	78951218	78951232	-	secondary.p53+p63RE	8.6466	GGCAGGGCAGGACA
chr10	79237605	79238175	17	chr10	79237906	79237925	+	primary.p53+p63RE	9.2912	CAGCTAGTCAGAACTTGTT
chr10	90051415	90051924	17	chr10	90051697	90051716	+	secondary.unique-p63RE	9.96929	ATCTGCCTGGGCATGAAGT
chr10	91652313	91652802	17	chr10	91652558	91652582	-	primary.unique-p63RE	8.39574	TGCTTCAAGTAAGCACTTGCAGTA
chr10	92200591	92201091	17	chr10	92200764	92200788	+	primary.unique-p63RE	9.48452	TAAACATGACTCAACTTGAAGCAC
chr10	92329894	92330558	17	chr10	92330239	92330258	-	primary.p53+p63RE	9.38758	TCATGTTTGGTCTTGCTCC
chr10	99656468	99656976	17	chr10	99656801	99656820	+	primary.p53+p63RE	10.1225	TAACTTGTTGCAACATGTT
chr10	100998337	100999035	17	chr10	100998547	100998571	-	primary.unique-p63RE	7.98929	CCGGGCGAGCTCCGGCAGGCCTTG
chr10	101221515	101221952	17	chr10	101221735	101221754	+	primary.p53+p63RE	10.325	GAACATGCCCTTGCTAGTC
chr10	101830557	101831219	17	chr10	101831005	101831029	+	primary.unique-p63RE	8.40899	CACTCATGCACAGACACGCACGCA
chr10	102113057	102113539	17	chr10	102113246	102113270	-	primary.unique-p63RE	8.13119	CAGAGCCTGTGTGTGCCTGCACAC
chr10	102769702	102770408	17	chr10	102769971	102769995	+	primary.unique-p63RE	7.70263	TTTTCTTGCCTCAGCAGGCCTGCT
chr10	103757648	103758376	17	chr10	103757822	103757846	+	primary.unique-p63RE	8.34848	TTTGCAAGTTACCACAGGCCGGGA
chr10	109894562	109894966	17	chr10	109894719	109894738	-	secondary.unique-p63RE	10.23	CAACAAGTCCTGGCAGCTC
chr10	110398527	110399080	17	chr10	110398909	110398933	+	primary.unique-p63RE	7.75857	AAGGCTTGCCCAAACAAGAGGTCC
chr10	110862122	110862560	17	chr10	110862286	110862305	+	primary.p53+p63RE	10.1157	CAGCCTGCCTAAACATGTA
chr10	111473361	111473898	17	chr10	111473538	111473562	-	primary.unique-p63RE	9.3446	AAAGGCAAGTGAGGACCTGCACCT
chr10	114320459	114321071	17	chr10	114320780	114320804	+	primary.unique-p63RE	8.35757	CAGGCAGGCCCCTGCTGGCCCGGC
chr10	125453048	125453533	17	chr10	125453244	125453263	-	primary.p53+p63RE	10.4464	GCAAGTCCAGGCTTGCAGG
chr10	127939654	127940202	17	chr10	127940002	127940026	+	primary.unique-p63RE	8.85148	GAGGCAGGTGCAGGCAGGTACAGA
chr10	132424276	132424678	17	chr10	132424466	132424485	+	primary.p53+p63RE	10.7768	ATACAGGCCCTGGCATGTC
chr11	692816	693158	17	chr11	692937	692961	+	primary.unique-p63RE	9.38147	ACCACAAGCCCCGGCATGCGGCGC
chr11	8138347	8138905	17	chr11	8138730	8138749	+	primary.p53+p63RE	12.2471	TGGCATGCTTATACTTGTC
chr11	11584316	11584705	17	chr11	11584513	11584527	-	tertiary.unique-p63RE	8.54823	CACGTCTGAACACG
chr11	13260616	13261360	17	chr11	13260886	13260905	+	primary.p53+p63RE	10.3709	GGGCAAGTCAGGGCAAGCA
chr11	16788073	16788615	17	chr11	16788320	16788339	-	primary.p53+p63RE	9.89669	GCCAGTTAGAGCATGTTCA
chr11	27173982	27174477	17	chr11	27174278	27174302	-	primary.unique-p63RE	8.43214	AGGCTCGTGTAGAGACTTGCTGAA
chr11	27674004	27674553	17	chr11	27674178	27674202	-	primary.unique-p63RE	9.58433	CAAAACATGTGTGGACCTGCAACC
chr11	34176316	34176728	17	chr11	34176496	34176520	-	primary.unique-p63RE	7.98879	CCAGGCCTGCTGGCACACGCCTGT
chr11	34627037	34627569	17	chr11	34627368	34627392	-	primary.unique-p63RE	9.83691	CCTGGCAAGTAGGGACCTGCAGAA
chr11	35622115	35622634	17	chr11	35622320	35622344	+	primary.unique-p63RE	7.84384	GTTCCAAGCCCAGACTTGATCGTG
chr11	45158062	45158437	17	chr11	45158247	45158271	+	primary.unique-p63RE	8.75974	CCTGCATGTGGCCACAAGCCCACG
chr11	46066367	46066726	17	chr11	46066553	46066577	-	primary.unique-p63RE	8.50655	CCAGGCGTGACAGTGCATGCCTGT
chr11	46344907	46345432	17	chr11	46345216	46345240	-	primary.unique-p63RE	9.30804	CTGGGCTTGTCCCCACCTGCCCCT
chr11	58577704	58578292	17	chr11	58578094	58578108	-	secondary.p53+p63RE	9.54001	GGCAAGTCTGGGCA
chr11	62500236	62500731	17	chr11	62500484	62500508	-	primary.unique-p63RE	9.17931	AGAGTCAGGTTTGAACCTGTTCCT
chr11	62547928	62548308	17	chr11	62548101	62548125	+	primary.unique-p63RE	9.37616	CAGACAGGCAGAGACATGTGAAAA
chr11	64324573	64325140	17	chr11	64324876	64324895	-	primary.p53+p63RE	10.6793	GCCTGTCCTAGCATGCCCA
chr11	64437309	64437889	17	chr11	64437551	64437570	+	primary.p53+p63RE	12.5544	TGACATGCCTGATCATGCC
chr11	64881522	64881881	17	chr11	64881698	64881717	-	primary.p53+p63RE	11.7736	ACATGCACACGCATGTTTG
chr11	65182868	65183760	17	chr11	65183285	65183309	+	primary.unique-p63RE	8.8559	CTTGCAAGCCCAGGCAGGATCTGG
chr11	65225375	65226067	17	chr11	65225611	65225635	-	primary.unique-p63RE	8.79107	CCCTGCCGGCCTGGGCTTGCCCTT
chr11	65899037	65899489	17	chr11	65899229	65899248	-	primary.p53+p63RE	11.3085	ACAAGCCCAGGCAAGTCCC
chr11	66126678	66127540	17	chr11	66127108	66127127	-	primary.p53+p63RE	10.0186	TCAAGCAGGGACTTGTCCT
chr11	66619050	66619586	17	chr11	66619439	66619458	+	primary.p53+p63RE	10.6493	AAACATGTACAGACTTGTG
chr11	67310534	67311159	17	chr11	67310739	67310763	+	primary.unique-p63RE	8.74109	CGGGCAGGTTCCAGCCTGACCACA
chr11	67312692	67313154	17	chr11	67312950	67312974	+	primary.unique-p63RE	8.62961	TGGACAGGACCAAGCCTGTTCCAA
chr11	67656258	67656706	17	chr11	67656488	67656507	-	primary.p53+p63RE	13.2706	GCAAGTCCAAGCATGCCAC
chr11	68337289	68337673	17	chr11	68337468	68337487	-	primary.p53+p63RE	9.82789	TCAGGCCTGGGCATGCTCA
chr11	69510383	69511054	17	chr11	69510686	69510710	+	primary.unique-p63RE	8.70405	CCAACAAGCCCTTGCTAGCCCAGC
chr11	72831613	72832153	17	chr11	72831890	72831914	-	primary.unique-p63RE	8.37998	AGCAACGTGTTCAGACTCGCAGTT
chr11	75500601	75501175	17	chr11	75500936	75500955	-	primary.p53+p63RE	11.3191	GCAGGCCTGGGCATGCCTT
chr11	75563787	75564290	17	chr11	75563981	75564005	+	primary.unique-p63RE	8.49073	CCTGCTTGCAGTAACTTGCCTTCC
chr11	79156032	79156552	17	chr11	79156171	79156190	+	primary.p53+p63RE	10.4411	GGACAGGTCTGGGCTTGCA
chr11	86719888	86720645	17	chr11	86720256	86720275	-	primary.p53+p63RE	11.7582	GCATGTGGGGACATGCCTG
chr11	101478520	101478908	17	chr11	101478662	101478681	-	primary.p53+p63RE	10.7548	TCAAGTCCAAGCTTGCCCC
chr11	107893165	107893655	17	chr11	107893374	107893393	-	primary.p53+p63RE	9.56883	TCAAGTCTGGGCCTGTTAC
chr11	108698704	108699566	17	chr11	108699146	108699170	+	primary.unique-p63RE	9.31056	AGAACAGGACCTGACATGTAGTAG
chr11	110296802	110297229	17	chr11	110296819	110296838	+	quinary.unique-p63RE	7.19853	GTGGGTGGCTGCGGGCTCG
chr11	111378448	111378821	17	chr11	111378616	111378640	+	primary.unique-p63RE	8.74528	GGAGCAAGTGAGGACACGCTTCAC
chr11	118153157	118153524	17	chr11	118153361	118153380	-	primary.p53+p63RE	9.88783	GCGTGTGCGGGCTTGCCCA
chr11	118910312	118910637	17	chr11	118910482	118910496	-	tertiary.unique-p63RE	6.91925	CAGGCCCGGGCGGG
chr11	119612845	119613257	17	chr11	119613011	119613030	+	primary.p53+p63RE	12.8024	TGGCATGCCTAGGCTTGTA
chr11	119752186	119752666	17	chr11	119752467	119752486	-	primary.p53+p63RE	11.58	ACATGCACAGACATGCTCC
chr11	119860511	119861667	17	chr11	119861337	119861361	+	primary.unique-p63RE	9.46263	GGGGCAGGACCAGACTTGCTGGCA
chr11	120055397	120056009	17	chr11	120055753	120055772	+	primary.p53+p63RE	10.7962	AGACATGATGGGACTTGTT
chr11	130947461	130947934	17	chr11	130947608	130947632	+	primary.unique-p63RE	10.3182	TTGGCAGGCAGCGACATGCCCATT
chr12	847783	848313	17	chr12	847948	847967	+	primary.p53+p63RE	11.9128	AGGCATGTGCCAACATGCC
chr12	3217302	3217850	17	chr12	3217527	3217551	-	primary.unique-p63RE	8.22246	AGGGCCCTGTTTGGGCTTGTTCTT
chr12	6225960	6226352	17	chr12	6226132	6226156	+	primary.unique-p63RE	8.13317	GCTTCCAGTTTAAACCTGCCTGGG
chr12	6312772	6313282	17	chr12	6313067	6313081	+	secondary.p53+p63RE	8.17405	GACCAGGCCTGCCC
chr12	6507413	6508021	17	chr12	6507809	6507828	-	primary.p53+p63RE	11.7636	GCGTGTCCAGGCATGTAAC
chr12	12469382	12470033	17	chr12	12469655	12469674	-	primary.p53+p63RE	10.4288	ACGTGACCAGACATGTATT
chr12	13099781	13100204	17	chr12	13099986	13100005	-	primary.p53+p63RE	10.6669	GCATGTCCTAGCATGTGCC
chr12	15446854	15447197	17	chr12	15446995	15447009	-	tertiary.unique-p63RE	9.23649	CATGTTAGCACACG
chr12	19397464	19398034	17	chr12	19397699	19397723	-	primary.unique-p63RE	8.53569	AGCTGCCTGCTGAATCTTGCCTAC
chr12	22624941	22625425	17	chr12	22625151	22625170	-	primary.p53+p63RE	10.686	GCCAGCCCCGGCATGCTCT
chr12	25054116	25054768	17	chr12	25054282	25054306	-	primary.unique-p63RE	10.3204	CTGTTCATGTTGAGACATGAATCA
chr12	26496139	26496602	17	chr12	26496326	26496350	+	primary.unique-p63RE	10.2052	CCTTCATGCTGTGACATGTAGCTC
chr12	27548962	27549541	17	chr12	27549353	27549367	-	tertiary.unique-p63RE	8.38491	CATGCCTGTACGTG
chr12	27999540	28000128	17	chr12	27999745	27999769	-	primary.unique-p63RE	8.91236	TTGAACAAGTTTGTTCTTGATTTA
chr12	32901461	32901832	17	chr12	32901600	32901624	+	primary.unique-p63RE	9.09001	CGAGCAGGCCCTGTCATGTTCTTC
chr12	46678389	46678793	17	chr12	46678609	46678628	+	primary.p53+p63RE	9.83165	GTACAAGTTAAGACTTGCT
chr12	47304117	47304563	17	chr12	47304299	47304318	+	primary.p53+p63RE	12.1116	GGACATGACTATACATGTT
chr12	47781975	47782414	17	chr12	47782174	47782198	-	primary.unique-p63RE	9.13106	GTGAGCTTGTCCAGGCCTGTGCCT
chr12	50220291	50220714	17	chr12	50220523	50220547	-	primary.unique-p63RE	9.73579	TTTGGCCAGTTTCAACATGCAGCA
chr12	50349162	50349563	17	chr12	50349353	50349372	+	primary.p53+p63RE	9.71078	AGGCATGCACCATCATGTA
chr12	52151928	52152749	17	chr12	52152714	52152738	+	primary.unique-p63RE	8.26846	CCTGCCTGTCCTGGCCTGTGCTGG
chr12	52580159	52580524	17	chr12	52580309	52580328	-	primary.p53+p63RE	9.2552	ACAAGCACTGTCTTGCCCT
chr12	52582878	52583198	17	chr12	52583021	52583040	-	primary.p53+p63RE	11.802	GCCAGCCTGGGCATGCCAG
chr12	52906252	52906756	17	chr12	52906575	52906589	-	tertiary.unique-p63RE	8.38801	CCAGGCAGGGCATG
chr12	53223988	53224307	17	chr12	53224153	53224177	-	primary.unique-p63RE	8.82535	GAGCACAGGCCTGTGCTTGCCTCA
chr12	53381985	53382698	17	chr12	53382417	53382441	+	primary.unique-p63RE	9.32464	CCAGCAAGTTCTGACAGGACTACC
chr12	55608065	55608662	17	chr12	55608409	55608428	-	primary.p53+p63RE	10.0028	GCATGTCACAGCTTGCCTT
chr12	56897847	56898458	17	chr12	56898200	56898224	-	primary.unique-p63RE	8.89889	TTAAACTTGCCTGGTCTTGAACAT
chr12	68042042	68042755	17	chr12	68042259	68042278	-	primary.p53+p63RE	13.9972	TCATGTCTGGGCATGTTTG
chr12	80777989	80778504	17	chr12	80778245	80778264	-	primary.p53+p63RE	10.8461	ACAAGCCCAAACTAGCCTA
chr12	84508938	84509369	17	chr12	84509123	84509142	+	primary.p53+p63RE	9.21589	TGGCCTGCCAGCACTTGTC
chr12	92973581	92974015	17	chr12	92973826	92973845	+	primary.p53+p63RE	11.033	GTGCATGTTGGAACTTGCC
chr12	93744018	93744485	17	chr12	93744194	93744213	+	primary.p53+p63RE	9.44017	CAGCAGGCCTGGACTTGTA
chr12	96193684	96194202	17	chr12	96193869	96193888	-	quinary.unique-p63RE	9.23148	AGGCGTGAGCCAGCACGCC
chr12	98644120	98645175	17	chr12	98644550	98644574	+	primary.unique-p63RE	8.82116	ACAGCAGGCTCAGGCACGTTCGGG
chr12	104546671	104547111	17	chr12	104546860	104546884	+	primary.unique-p63RE	8.32163	CAAACTTGCTGTGACAAGTATGGT
chr12	106112456	106112873	17	chr12	106112689	106112713	-	primary.unique-p63RE	8.86374	TTTAGCCTGTTGGTTCATGTCCTA
chr12	107320796	107321517	17	chr12	107321208	107321232	-	primary.unique-p63RE	9.40331	TCATTCATGTTGCTGCCTGTCTGT
chr12	107380165	107380723	17	chr12	107380416	107380440	+	primary.unique-p63RE	9.45813	GCTGCGTGTCCCAACATGACTGAG
chr12	116497091	116497464	17	chr12	116497242	116497266	-	primary.unique-p63RE	8.29765	GCTGTCAGGTTGGCACTTGCTGCC
chr12	120445994	120446801	17	chr12	120446338	120446357	-	primary.p53+p63RE	11.6731	TCATGTCCGTGCATGCCTC
chr12	120914833	120915243	17	chr12	120915016	120915030	-	tertiary.unique-p63RE	6.90816	CGCGTCAGCACTTG
chr12	122721048	122721502	17	chr12	122721271	122721290	-	primary.p53+p63RE	9.74716	GCATGTTTTGTCTTGCTTG
chr12	124904610	124905085	17	chr12	124904907	124904931	-	primary.unique-p63RE	8.25834	ACGTGCTTGCAGGGACACGCTGGC
chr12	124927791	124928273	17	-	-	-		Other	0	-
chr13	20350814	20351280	17	chr13	20350995	20351009	-	tertiary.unique-p63RE	7.7107	CCTGTCAGCACAAG
chr13	21683157	21683789	17	chr13	21683522	21683546	+	primary.unique-p63RE	8.65598	TGGGCAGGAATAGACTTGTCACCA
chr13	34048657	34049127	17	chr13	34048930	34048954	-	primary.unique-p63RE	9.42864	CTGGGCATGATGTCACATGCCTGT
chr13	39512699	39513088	17	chr13	39512903	39512927	+	primary.unique-p63RE	7.99931	AAGACGTGCCCAGGCACGCGCGAC
chr13	40172145	40172694	17	chr13	40172392	40172406	-	tertiary.unique-p63RE	7.17562	CAAGCCTTGGCGTG
chr13	40190530	40191025	17	chr13	40190704	40190728	+	primary.unique-p63RE	8.03669	GCTTCAGGCTGTAACAGGCACCAG
chr13	40233629	40234099	17	chr13	40233804	40233823	+	primary.p53+p63RE	10.9311	GCACATGTCCTCACATGTC
chr13	41137169	41137752	17	chr13	41137506	41137530	+	primary.unique-p63RE	7.71714	CTGGCAAGACCAGACACGAGTCTC
chr13	41260011	41260678	17	chr13	41260329	41260353	-	primary.unique-p63RE	8.83824	GGCAACAAGTGAGAACCTGCTTCT
chr13	43002723	43003627	17	chr13	43003193	43003212	+	primary.p53+p63RE	10.9512	GTTCATGTTTGGACTTGTT
chr13	46554143	46554807	17	chr13	46554551	46554575	+	primary.unique-p63RE	8.3239	CCGGCAAGTTGTAACTCGCGCCAA
chr13	50261545	50261984	17	chr13	50261786	50261805	+	primary.p53+p63RE	10.8626	AGGCTTGTCTGAGCCTGCC
chr13	56424238	56424669	17	chr13	56424412	56424431	+	primary.p53+p63RE	10.3591	GGACAAGTTGGAACTTGTA
chr13	73261778	73262249	17	chr13	73262013	73262037	-	primary.unique-p63RE	9.35786	TCACACAAGTACAGTCATGCATGG
chr13	73286996	73287383	17	chr13	73287164	73287183	-	primary.p53+p63RE	9.36046	GCTAGCCCAGACTAGCCTA
chr13	73429709	73430057	17	chr13	73429881	73429905	-	primary.unique-p63RE	8.35333	CACTCCTTGTCTGAACATGCAGCA
chr13	79604863	79605248	17	chr13	79605076	79605095	-	primary.p53+p63RE	10.8782	GCATGCTCTGACTTGCCAT
chr13	85108370	85108869	17	chr13	85108557	85108576	+	primary.p53+p63RE	11.988	AGGCATGCCCCGACCTGCC
chr13	98582745	98583403	17	chr13	98583116	98583130	+	secondary.p53+p63RE	8.67333	GCCCAGACATGCAT
chr13	99614273	99614726	17	chr13	99614425	99614444	+	primary.p53+p63RE	11.3488	GGACATGCCTGGGCTGGAC
chr13	100100350	100100874	17	chr13	100100700	100100719	+	primary.p53+p63RE	10.4234	AAACCAGTTCAGACTTGTC
chr13	109738106	109738800	17	chr13	109738434	109738453	+	primary.p53+p63RE	10.5274	AGATTTGCCTGGGCTTGTT
chr13	110122871	110123253	17	chr13	110123065	110123084	+	primary.p53+p63RE	12.7854	AGACGTGCCTGGGCATGCC
chr14	22159024	22159521	17	chr14	22159208	22159232	+	primary.unique-p63RE	9.50296	CCAGCAGGTGCCAGCATGTTCTAA
chr14	23631639	23632434	17	chr14	23632008	23632027	-	primary.p53+p63RE	11.1171	GCAAGTTCAGACAAGCAGG
chr14	24309859	24310248	17	chr14	24310028	24310052	+	primary.unique-p63RE	9.32822	AAGGCAGGCTCTCACATGCCTGGA
chr14	32473457	32473880	17	chr14	32473718	32473732	+	secondary.p53+p63RE	8.09385	GCCTGGTCTTGTTT
chr14	35826513	35827099	17	chr14	35826857	35826881	-	primary.unique-p63RE	8.67833	CGGGGCGGGCCTGGGCTTGTCCAG
chr14	36816509	36816866	17	chr14	36816640	36816659	+	primary.p53+p63RE	10.5289	AGGCATGCACCATCATGCC
chr14	45785276	45785789	17	chr14	45785511	45785530	-	primary.p53+p63RE	12.9325	ACTTGCCAAGACATGCCCA
chr14	50081824	50082504	17	chr14	50082183	50082202	+	primary.p53+p63RE	9.97579	GAGCAAGCCCTCACTTGTC
chr14	50599951	50600710	17	chr14	50600391	50600410	+	primary.p53+p63RE	12.7956	AAACATGTTTGGACTTGTA
chr14	53993785	53994453	17	chr14	53994097	53994121	-	primary.unique-p63RE	9.81105	GCAGACAAGTTGGAACTTGAATTG
chr14	61964987	61965372	17	chr14	61965176	61965195	+	primary.p53+p63RE	10.0755	AAACATGTCTAAACAGGGC
chr14	63853847	63854393	17	chr14	63854094	63854118	+	primary.unique-p63RE	9.3037	TGTACAAGCACCAGCAAGTCGGAG
chr14	64118035	64118443	17	chr14	64118255	64118274	+	primary.p53+p63RE	10.2612	TGGCATGACCGAGCAGGCT
chr14	66379081	66379442	17	chr14	66379242	66379266	-	primary.unique-p63RE	8.37633	GGAAGCCTGCCCAGACTGGTAAGT
chr14	66932541	66933148	17	chr14	66932798	66932817	-	primary.p53+p63RE	14.1905	GCAAGTCTAGACATGCCCT
chr14	68941852	68942266	17	chr14	68941838	68941862	+	primary.unique-p63RE	7.79122	CTAGCAGGATCCAGCAGGCACTGC
chr14	70755588	70756220	17	chr14	70755853	70755877	+	primary.unique-p63RE	8.71448	GGAACAAGTCTAGACTAGAGCAAC
chr14	74261243	74261723	17	chr14	74261473	74261497	+	primary.unique-p63RE	9.63299	TGTGCAGGCCCAGGCAGGCCCAGC
chr14	75002447	75002904	17	chr14	75002622	75002641	+	quartenary.p53+p63RE	9.44475	GGCGCGTAGAGACTTGCTG
chr14	88616710	88617100	17	chr14	88616912	88616931	-	primary.p53+p63RE	9.30511	GCAAGTGCGGGCAGGTTGA
chr14	99035735	99036282	17	chr14	99036061	99036085	-	primary.unique-p63RE	7.85113	AGGAGCTGGCCACGACCTGCCAGG
chr14	99612692	99613293	17	chr14	99613115	99613134	+	secondary.unique-p63RE	9.19073	CCTTGTCGTGACCTGCCCT
chr14	100320237	100320872	17	chr14	100320641	100320660	-	primary.p53+p63RE	11.6453	TCAAGTTAGGGCATGTTTG
chr14	100691643	100691998	17	chr14	100691814	100691833	-	primary.p53+p63RE	11.5842	ACAAGTGCGGACATGCTTG
chr14	103512711	103513403	17	chr14	103512899	103512923	-	primary.unique-p63RE	8.18652	CTGGGCAGGCTCTTTCTTGTCACT
chr14	105166856	105167547	17	chr14	105166953	105166967	+	secondary.p53+p63RE	8.82291	GCCTGGGCCTGCCC
chr15	29946199	29946707	17	chr15	29946460	29946479	-	primary.p53+p63RE	9.61183	ACATGCCCAGGCCAGCAAG
chr15	31465401	31466097	17	chr15	31465882	31465901	-	primary.p53+p63RE	10.5401	GCCTGTGCAAACATGCCAT
chr15	32659482	32659903	17	chr15	32659697	32659721	+	primary.unique-p63RE	8.33497	CAGGCCTGTGTCAACAAGCCCTGC
chr15	35319355	35319770	17	chr15	35319538	35319552	+	tertiary.unique-p63RE	7.35426	AAGACCAGGCTGGC
chr15	36653857	36654236	17	chr15	36654036	36654055	+	primary.p53+p63RE	9.69376	TGACAAGTCTATGCTGGCC
chr15	41207605	41208330	17	chr15	41207869	41207888	-	primary.p53+p63RE	10.1002	GCATGTTGGCTCATGCCTG
chr15	41946907	41947312	17	chr15	41947070	41947089	+	primary.p53+p63RE	10.2306	ACACATGCCATAACATGCT
chr15	47801518	47801927	17	chr15	47801707	47801721	-	secondary.p53+p63RE	8.37789	GACAAGCGCGGGCA
chr15	48759717	48760278	17	chr15	48760010	48760029	+	primary.p53+p63RE	11.7526	TAACATGTATCAACATGTT
chr15	50355025	50355703	17	chr15	50355431	50355455	+	primary.unique-p63RE	8.53016	ACCGCAAGTCCCGGCTCGCCCGGC
chr15	50797853	50798447	17	chr15	50798087	50798111	+	primary.unique-p63RE	9.08912	TTAACAAGTCATAACATGAAATCA
chr15	51080134	51080673	17	chr15	51080459	51080478	-	primary.p53+p63RE	10.6069	TCAAGTCTGGGCATGTTTC
chr15	51776807	51777299	17	chr15	51777081	51777105	-	primary.unique-p63RE	9.20034	AGAGGCCTGTTGAGTCTTGCAGGC
chr15	51864310	51865066	17	chr15	51864678	51864697	-	primary.p53+p63RE	11.4872	GCAAGTTTGAACAAGTTTA
chr15	52076749	52077516	17	chr15	52077174	52077188	+	secondary.p53+p63RE	8.87091	GTCTGAACATGTCT
chr15	52093633	52094129	17	chr15	52093910	52093929	-	primary.p53+p63RE	9.26907	GCATGATGAGACCTGCCTG
chr15	52334676	52335286	17	chr15	52335000	52335019	-	primary.p53+p63RE	10.8021	ACAAGACCTGGCATGTTGG
chr15	55408034	55408572	17	chr15	55408368	55408382	-	tertiary.unique-p63RE	6.81199	CATGCCGTGACGCG
chr15	56244520	56244848	17	chr15	56244654	56244678	-	primary.unique-p63RE	8.98833	TAGCTCAAGTCGCGGCTTGTCAGG
chr15	56369148	56369701	17	chr15	56369472	56369491	-	primary.p53+p63RE	11.9754	GCATGTGCTAACATGCCTG
chr15	60409175	60409537	17	chr15	60409391	60409415	+	primary.unique-p63RE	9.94045	GGAACAAGCTGAAACATGAACCCA
chr15	69685553	69686015	17	chr15	69685730	69685749	+	primary.p53+p63RE	10.0212	AAACGTGCCTAGGCATGAA
chr15	70196492	70196901	17	chr15	70196687	70196706	-	quinary.unique-p63RE	8.37667	GGACAAGAATCAACAGGAA
chr15	76150832	76151236	17	chr15	76151008	76151027	-	primary.p53+p63RE	9.99611	ACCTGCCAGGACATGCCAT
chr15	79035125	79035913	17	chr15	79035539	79035563	-	primary.unique-p63RE	8.92065	CTCCTCAAGTCCCGGCCTGCTGGG
chr15	82742046	82742755	17	chr15	82742409	82742428	+	primary.p53+p63RE	12.5881	AAACATGCCAGAGCATGCT
chr15	84001077	84001464	17	chr15	84001257	84001276	-	primary.p53+p63RE	10.0667	ACAAGTAGAGTCATGCATG
chr15	88620995	88621795	17	chr15	88621305	88621324	+	primary.p53+p63RE	12.3454	GGGCTTGCCCGGGCATGTG
chr15	89958054	89958577	17	chr15	89958425	89958439	-	secondary.p53+p63RE	8.84207	GACATGGCCAGGCC
chr15	91021836	91022501	17	chr15	91022138	91022162	+	primary.unique-p63RE	9.55365	CAGGCAAGCACTGACCTGCTCCAG
chr15	91894724	91895041	17	chr15	91894871	91894895	+	primary.unique-p63RE	8.13403	GAAGCAGGTTGTAGCTCGCCTGCA
chr15	93831612	93832066	17	chr15	93831822	93831846	+	primary.unique-p63RE	10.7682	TCTGCAGGCTCCAACATGCTCAGG
chr15	94677431	94677806	17	chr15	94677621	94677645	+	primary.unique-p63RE	8.79398	GAGACAGGCCCAGGCATGAGACGG
chr15	98683253	98683716	17	chr15	98683490	98683509	+	secondary.unique-p63RE	10.4198	TTGTGTTACAACTTGTTTA
chr15	98775098	98775674	17	chr15	98775449	98775463	+	tertiary.unique-p63RE	8.14072	TTGTGCAAACAAGT
chr15	98896929	98897518	17	chr15	98897178	98897192	-	secondary.p53+p63RE	8.9439	GGCAAGCCCTGACA
chr15	101112566	101113183	17	chr15	101112918	101112942	-	primary.unique-p63RE	8.64222	CTGGGCAAGTTGGGGCTGGAAAGC
chr16	354100	354775	17	chr16	354400	354419	-	primary.p53+p63RE	9.45279	TCATGTCCATACCTGCCAG
chr16	1036802	1037363	17	chr16	1037135	1037159	+	primary.unique-p63RE	8.5091	GCAGCGGGCAGAGACATGCAGGGA
chr16	2163199	2163714	17	chr16	2163412	2163426	-	tertiary.unique-p63RE	8.73922	CCTGTCGTGGCAGG
chr16	4597265	4597691	17	chr16	4597514	4597538	+	primary.unique-p63RE	9.47435	ACAGCAAGCCAGGACTTGAATCAT
chr16	8716615	8716957	17	chr16	8716751	8716770	+	primary.p53+p63RE	10.4991	AGACAGGCCCAGGCAGGCC
chr16	10616556	10617144	17	chr16	10616759	10616783	+	primary.unique-p63RE	8.63247	GGAGCGAGTCCTGGCCTGTCCAAC
chr16	11613303	11613791	17	chr16	11613475	11613499	-	primary.unique-p63RE	9.29968	TTCCGCCTGTTTAGACCTGCCCCA
chr16	11627858	11628388	17	chr16	11628058	11628082	-	primary.unique-p63RE	8.78679	CAAGACAAGCACAGTCCTGCAGAA
chr16	11676873	11677265	17	chr16	11677059	11677073	-	secondary.p53+p63RE	8.62642	GGCGAGTCAGGGCA
chr16	15644197	15644661	17	chr16	15644368	15644392	+	primary.unique-p63RE	9.58516	AGGGCAGGATCAGACATGTAGCTG
chr16	18962454	18962773	17	chr16	18962623	18962642	-	primary.p53+p63RE	9.66952	TCAAGTCCCAGCAAGTCTG
chr16	23072764	23073305	17	chr16	23072766	23072790	+	primary.unique-p63RE	8.9795	AGTACATGAAGCAGCATGACTGTC
chr16	23768650	23768957	17	chr16	23768803	23768827	+	primary.unique-p63RE	8.54945	CCTTCAAGAAGGAACTTGCCCTTC
chr16	23771081	23771428	17	chr16	23771230	23771254	-	primary.unique-p63RE	7.986	ACGTGCGTGTCATTTCATGTTCTA
chr16	27317194	27317721	17	chr16	27317447	27317461	+	secondary.p53+p63RE	8.06787	GCCCAGCCACGTTT
chr16	51553164	51553749	17	chr16	51553487	51553506	-	primary.p53+p63RE	12.7207	ACATGCCCAGACTAGCTCA
chr16	53449752	53450363	17	chr16	53450004	53450023	-	primary.p53+p63RE	11.1998	ACAAGTTTAGGCTTGTTGG
chr16	56608208	56608727	17	chr16	56608492	56608506	-	secondary.p53+p63RE	8.42742	GGCGTGTGCAGGCA
chr16	56833562	56834158	17	chr16	56833751	56833770	-	primary.p53+p63RE	9.46163	GCATGTGCATACCTGCCTG
chr16	57619523	57620587	17	chr16	57620341	57620360	-	primary.p53+p63RE	9.69308	GCATGGCCGGGCATGCTGG
chr16	68707116	68707857	17	chr16	68707456	68707480	-	primary.unique-p63RE	8.71182	CAGGGCCTGTCGGGGCCTGTGGGC
chr16	68798291	68798955	17	chr16	68798639	68798658	-	primary.p53+p63RE	11.7616	GCAAGTCCAATCATGCTTG
chr16	69404450	69404888	17	chr16	69404722	69404741	+	secondary.unique-p63RE	9.42918	ATGGGTCAGAACTTGTCAC
chr16	69660112	69660622	17	chr16	69660397	69660411	-	tertiary.unique-p63RE	6.60315	CCAGCCTGGGCAGC
chr16	74813098	74813610	17	chr16	74813344	74813368	+	primary.unique-p63RE	9.04195	GGAACAGGCTGGGACACGCCTGCC
chr16	78105512	78105867	17	chr16	78105680	78105704	+	primary.unique-p63RE	9.33901	CAGGCATGAGGCTACATGTCTGAG
chr16	79885303	79885723	17	chr16	79885471	79885490	-	primary.p53+p63RE	9.62144	GCAGGTCCGGGCAGGCCCG
chr16	81908464	81908972	17	chr16	81908679	81908703	-	primary.unique-p63RE	9.03439	TTGGGCAGGCTGGGACCTGAATCC
chr16	82633805	82634500	17	chr16	82634011	82634030	+	primary.p53+p63RE	9.76992	AGGCACGTTTTGACTTGTC
chr16	84642983	84643461	17	chr16	84643279	84643303	-	primary.unique-p63RE	8.03692	GCAGGCCTGCTCTTTCATGCCAGG
chr16	85152348	85153300	17	chr16	85152835	85152859	+	primary.unique-p63RE	8.84167	GGGACAGGCTCCAACACGTTCCCT
chr16	86676131	86676863	17	chr16	86676333	86676352	-	primary.p53+p63RE	12.2982	TCATGCACTGACATGTCTG
chr16	87777860	87778371	17	chr16	87778177	87778196	+	primary.p53+p63RE	10.1522	CTACATGACTAGACTTGCT
chr16	89150099	89150491	17	chr16	89150295	89150314	+	primary.p53+p63RE	11.4525	ACACATGCCTGGGCTTGCA
chr16	89404535	89404948	17	chr16	89404725	89404749	+	primary.unique-p63RE	9.03185	AGAACAGGCAGGGACAGGCCCAGC
chr16	89458498	89459177	17	chr16	89458628	89458647	-	primary.p53+p63RE	13.7124	GCAAGTTCAGACATGTTCC
chr17	2737017	2737398	17	chr17	2737210	2737234	-	primary.unique-p63RE	8.21859	AGGAACCTGCCTTCACCTGCCCCT
chr17	3666314	3667307	17	chr17	3667201	3667220	-	primary.p53+p63RE	12.3075	GCATGCTGGTGCATGCCTG
chr17	4393784	4394479	17	chr17	4394062	4394086	+	primary.unique-p63RE	8.98821	ATGGCAAGATGAGACCTGCTTTTA
chr17	4866467	4866810	17	chr17	4866630	4866654	+	primary.unique-p63RE	8.327	CAGGCATGATGGCACACGCCTGTA
chr17	6655082	6655530	17	chr17	6655327	6655346	+	primary.p53+p63RE	11.2021	GTGCATGTCCGCGCTTGCC
chr17	7444094	7444602	17	chr17	7444289	7444313	+	primary.unique-p63RE	9.52574	ATGGCATGACTGAACCTGCATCTG
chr17	7867747	7868342	17	chr17	7868014	7868038	+	primary.unique-p63RE	9.52896	CGGGCAGGCAGGCACATGTCCAGA
chr17	10119756	10120147	17	chr17	10119987	10120001	-	tertiary.unique-p63RE	6.98976	CAAGCTGGCACTCG
chr17	16189767	16190136	17	chr17	16189956	16189975	-	primary.p53+p63RE	9.2791	GCATGCTGCTTCATGCCTA
chr17	18849874	18850516	17	chr17	18850264	18850278	+	secondary.p53+p63RE	8.36233	GCCCAGCCATGTGT
chr17	19719177	19719701	17	chr17	19719516	19719540	+	primary.unique-p63RE	7.99267	GGGGCAAGAGCCAACCTGAACAAG
chr17	22521250	22521560	17	-	-	-		Other	0	-
chr17	28507680	28508529	17	chr17	28508062	28508086	-	primary.unique-p63RE	8.46611	CAGGGCCTGCCGAGGCACGCTGCA
chr17	29583675	29584419	17	chr17	29584365	29584389	-	primary.unique-p63RE	8.31117	CATGCCATGTCCACACTTGCTGCT
chr17	31549627	31550281	17	chr17	31549950	31549969	+	primary.p53+p63RE	9.26522	AGTCAAGCCCGGGCTTGCG
chr17	34299849	34300454	17	chr17	34300070	34300089	-	primary.p53+p63RE	10.6306	GCATGTGGGTGCATGCTCA
chr17	39946689	39947336	17	chr17	39947148	39947172	-	primary.unique-p63RE	9.22821	CCCAACTTGTCACCACATGCAGCA
chr17	40510106	40510608	17	chr17	40510489	40510498	-	quinary.p53+p63RE	6.71465	GCATGCCCA
chr17	41301312	41302207	17	chr17	41301652	41301676	+	primary.unique-p63RE	8.16414	TCTTCGTGCCTGGACAAGTTCCCT
chr17	41651542	41652022	17	chr17	41651740	41651764	+	primary.unique-p63RE	7.90686	CCAGCCAGTACCAGCCTGTTCTCG
chr17	42529841	42530240	17	chr17	42530059	42530078	-	primary.p53+p63RE	10.5289	GCATGATGGTGCATGCCTG
chr17	45170861	45171472	17	chr17	45171390	45171404	-	tertiary.unique-p63RE	6.34586	CCTGCCTGCCCCTG
chr17	49507924	49508763	17	chr17	49508231	49508250	-	primary.p53+p63RE	10.4973	GCAAGTCCAGACCAGCCAG
chr17	49523623	49524080	17	chr17	49523826	49523850	-	primary.unique-p63RE	8.3729	CCTATCAGGCTGGGGCCTGCCTCA
chr17	49980733	49981197	17	chr17	49980951	49980975	-	primary.unique-p63RE	9.96505	CTCTGCAAGCTCGGGCCTGCTGCA
chr17	50148763	50149107	17	chr17	50148919	50148938	+	primary.p53+p63RE	9.37525	GGGCAGGTCGGGGCAGGCC
chr17	57196112	57196600	17	chr17	57196317	57196336	+	primary.p53+p63RE	11.354	GGGCTAGCCTAGGCTTGTT
chr17	57867934	57868627	17	chr17	57868213	57868232	-	secondary.unique-p63RE	10.4044	GGGCAAGTTCAAACAGTTT
chr17	57946353	57947015	17	chr17	57946647	57946666	-	primary.p53+p63RE	10.5313	GCATGCTCACACTTGCTTT
chr17	59139800	59140298	17	chr17	59140089	59140108	+	primary.p53+p63RE	9.97211	ATGCATGACTATGCTTGTC
chr17	60082150	60082826	17	chr17	60082441	60082465	-	primary.unique-p63RE	8.0946	CCGGACGTGTTGGCACACGCCTGT
chr17	60600056	60600686	17	chr17	60600251	60600265	-	secondary.p53+p63RE	9.95315	GACAAGTCCAGACA
chr17	61474599	61475115	17	chr17	61474853	61474877	-	primary.unique-p63RE	8.98422	AGGCTCAAGTTTATACTTGTCTTG
chr17	62670255	62670800	17	chr17	62670520	62670539	+	primary.p53+p63RE	9.21831	AATCCTGCCCGAGCATGAC
chr17	68697588	68698304	17	chr17	68697983	68698002	+	primary.p53+p63RE	13.0071	AAACAAGCCTGGACTTGCC
chr17	69870672	69871044	17	chr17	69870821	69870840	-	primary.p53+p63RE	9.24888	ACAAGTGCAAACCTGCCTT
chr17	75352079	75352543	17	chr17	75352244	75352268	+	primary.unique-p63RE	8.72435	CCATCATGAAGAGACAAGCTCAGC
chr17	75723188	75723670	17	chr17	75723379	75723403	-	primary.unique-p63RE	7.95475	CCAGGCCTGTACCTGCCTGTGTAA
chr17	75844835	75845547	17	chr17	75845309	75845323	+	tertiary.unique-p63RE	8.25276	AGGTCCTGACGTGC
chr17	80575397	80575774	17	chr17	80575576	80575600	+	primary.unique-p63RE	8.65396	CATACATGCATGCACACGCTTGGA
chr17	82502235	82502635	17	chr17	82502454	82502468	-	secondary.p53+p63RE	8.067	GGCATGTCTAGAAC
chr18	3679115	3679557	17	chr18	3679345	3679364	+	primary.p53+p63RE	9.75105	TGACATGACACTACTTGTC
chr18	23453354	23454088	17	chr18	23453814	23453838	-	primary.unique-p63RE	8.92146	GGAAACAAGCACGATCTTGTTTTT
chr18	26550177	26550828	17	chr18	26550498	26550517	-	primary.p53+p63RE	10.679	ACAAGTTAGAGCAAGTCCC
chr18	27789320	27789815	17	chr18	27789610	27789629	-	primary.p53+p63RE	10.3762	ACATGACCAGGCTAGTATT
chr18	31294254	31294697	17	chr18	31294513	31294537	-	primary.unique-p63RE	8.35074	GAGCACAGGTTACTGCTTGCTCTG
chr18	32382892	32383413	17	chr18	32383151	32383170	-	primary.p53+p63RE	9.24032	ACCAGTTCTAACATGTTGG
chr18	44732077	44732572	17	chr18	44732306	44732325	+	primary.p53+p63RE	10.135	TAACATGCTACGACTTGAC
chr18	45565522	45566077	17	chr18	45565959	45565983	+	primary.unique-p63RE	8.67938	GTGTCAGGTGGGGACATGTGTGTT
chr18	46387832	46388615	17	chr18	46388457	46388481	-	primary.unique-p63RE	10.4227	AAACACATGTTGGGACCTGCACGT
chr18	57980483	57981023	17	chr18	57980772	57980791	-	primary.p53+p63RE	11.2943	GCAAGTCCAGGCTTGTACT
chr18	58768529	58769085	17	chr18	58768838	58768857	+	primary.p53+p63RE	10.8103	GGGCATGCATCAACAGGCC
chr18	59899517	59900152	17	chr18	59899810	59899829	+	primary.p53+p63RE	10.7032	GAGCGTGTCCGGGCAGGTC
chr18	61606713	61607174	17	chr18	61606998	61607017	-	primary.p53+p63RE	9.38385	ACGAGCTCAGGCATGCAGC
chr18	61949768	61950339	17	chr18	61950126	61950150	-	primary.unique-p63RE	8.23662	CTATACGTGCTGGAACCTGAATTG
chr18	77086025	77086462	17	chr18	77086193	77086212	+	secondary.unique-p63RE	11.4654	ATCTGTTCCAACTTGTCCT
chr18	77114400	77115054	17	chr18	77114901	77114915	-	secondary.p53+p63RE	8.20879	GACGTGCCTGGGCG
chr18	79062783	79063178	17	chr18	79062959	79062983	+	primary.unique-p63RE	9.56571	TCAGCAGGCCCTGGCATGAAGGAC
chr19	778919	779321	17	-	-	-		Other	0	-
chr19	1252569	1253033	17	chr19	1252760	1252784	-	primary.unique-p63RE	9.52313	AGCGGCATGTAGAGTCCTGCCCTT
chr19	3520591	3521321	17	chr19	3520864	3520883	+	primary.p53+p63RE	9.53245	ACGCAAGCCAGTGCATGCC
chr19	4593479	4593856	17	chr19	4593681	4593705	+	primary.unique-p63RE	9.1495	ACGTCAAGTAAGCACATGTCCATG
chr19	5790479	5791012	17	chr19	5790812	5790836	-	primary.unique-p63RE	9.09248	TCCCACCTGCCCTAGCATGCACGT
chr19	6057322	6058040	17	chr19	6057730	6057754	+	primary.unique-p63RE	8.8054	TGAACAAGAAGGAACAAGCCCGGA
chr19	6577285	6578029	17	chr19	6577593	6577612	+	primary.p53+p63RE	13.1021	GGGCTTGTCTGGGCTTGCC
chr19	6615941	6616313	17	chr19	6616107	6616126	+	primary.p53+p63RE	10.7714	TGGCAAGACTGGGCATGAC
chr19	8224760	8225146	17	chr19	8224963	8224977	-	secondary.p53+p63RE	9.03099	GACGTGTCTGGACA
chr19	10520801	10521283	17	chr19	10521101	10521125	+	primary.unique-p63RE	9.27125	GAAGCATGCCTAGGCCAGCACACC
chr19	15195462	15195915	17	chr19	15195600	15195619	-	secondary.unique-p63RE	9.20447	AAACAGGTCGGGGCACGGC
chr19	18157635	18158011	17	chr19	18157817	18157841	-	primary.unique-p63RE	9.3791	CCCCGCAGGCCCCGGCTTGCCCCT
chr19	18756915	18757412	17	chr19	18757213	18757227	+	secondary.p53+p63RE	9.51956	GTCTGGTCATGCCT
chr19	18763752	18764455	17	chr19	18763838	18763857	+	quartenary.uniuqe-p63RE	10.6272	AGCATCTCTCGGCCTGCTG
chr19	33819999	33820560	17	chr19	33820183	33820202	-	quinary.unique-p63RE	6.7582	GTACGAGTAGGTACAAGGC
chr19	37966154	37966768	17	chr19	37966366	37966380	-	secondary.p53+p63RE	8.51486	GACAGGTTTGGACA
chr19	45402406	45402744	17	chr19	45402569	45402583	-	tertiary.unique-p63RE	8.2898	CGGGCCCGGGCAGG
chr19	46373914	46374327	17	chr19	46374148	46374162	-	secondary.p53+p63RE	8.39893	GGCCTGCCCAGACA
chr19	46453690	46454081	17	chr19	46453849	46453868	-	primary.p53+p63RE	10.4205	GCATGACAAGGCATGCACT
chr19	46461047	46461958	17	chr19	46461720	46461744	+	primary.unique-p63RE	7.74319	CATTCAGGCCTGAACAAGAGCCAG
chr19	48752398	48753121	17	chr19	48752624	48752648	-	primary.unique-p63RE	8.80239	CGCAGCCTGTCCGGACTGGCAGCG
chr19	49272093	49272594	17	chr19	49272336	49272355	-	primary.p53+p63RE	10.8735	ACATGTCTGGGCTAATCTG
chr19	50896512	50896996	17	chr19	50896681	50896700	+	primary.p53+p63RE	11.589	GGGCATGACTAAACATGCA
chr19	55446121	55446561	17	chr19	55446317	55446336	-	primary.p53+p63RE	9.36409	ACAAGCCACAGCATGCACG
chr2	11968047	11968488	17	chr2	11968287	11968311	+	primary.unique-p63RE	8.90535	TCTGCAAGTGCCGACAGGACTTTG
chr2	14288030	14288645	17	chr2	14288493	14288512	+	primary.p53+p63RE	9.81162	AAGCATGTGCATACAGGTC
chr2	14535069	14535589	17	chr2	14535246	14535270	+	primary.unique-p63RE	8.45486	CAAACAGGCCTGGACACGTGAGTG
chr2	17590495	17590958	17	chr2	17590767	17590786	-	primary.p53+p63RE	11.315	GCAAGTGTAGACATGCCTG
chr2	19073444	19073976	17	chr2	19073710	19073724	-	secondary.p53+p63RE	7.8045	GGCAGGGCAGGGCC
chr2	19228743	19229162	17	chr2	19228939	19228958	-	primary.p53+p63RE	11.0897	GCAAGCACAAGCTTGTCCT
chr2	21362102	21362539	17	chr2	21362305	21362324	+	primary.p53+p63RE	13.9239	GGGCAAGCCTGAACATGTC
chr2	24083993	24084755	17	chr2	24084388	24084402	-	secondary.p53+p63RE	8.68426	GACAGGGCAGGGCA
chr2	24276296	24276796	17	chr2	24276513	24276532	+	primary.p53+p63RE	9.26112	AGGCAAGTGTCAACATGCA
chr2	27705836	27706639	17	chr2	27706319	27706338	-	secondary.unique-p63RE	11.4314	GAACAAGTCCCAACACATG
chr2	28377353	28377801	17	chr2	28377545	28377564	-	primary.p53+p63RE	9.3208	GCCTGCTCGGACCTGCCCT
chr2	28927782	28928307	17	chr2	28927968	28927987	+	primary.p53+p63RE	10.2044	AGTCAAGCCAGGACTTGCT
chr2	29068388	29068855	17	chr2	29068670	29068689	-	primary.p53+p63RE	11.2133	GCATGCCTGGGCCTGTCTG
chr2	29966161	29966751	17	chr2	29966438	29966462	-	primary.unique-p63RE	8.29009	CCTGGCCTGCCCAGTCCTGCTGAG
chr2	33222306	33222789	17	chr2	33222474	33222498	+	primary.unique-p63RE	8.92464	CTTGCAGGCACCCACATGTACTTA
chr2	36367716	36368459	17	chr2	36367977	36367996	+	primary.p53+p63RE	9.85919	AGACAGGCCAAAACTTGCC
chr2	37361390	37361787	17	chr2	37361575	37361594	-	primary.p53+p63RE	11.9375	GCATGCCCTGGCTAGCCTG
chr2	37629462	37630050	17	chr2	37629681	37629700	+	primary.p53+p63RE	11.6054	AGGCAAGTGCAGACATGTT
chr2	41722681	41723216	17	chr2	41722919	41722938	+	primary.p53+p63RE	12.4198	AAGCAAGCCTAGACTTGTT
chr2	46170980	46171860	17	chr2	46171190	46171209	+	primary.p53+p63RE	10.1205	AGGCAAGCCAGGGCAGGCA
chr2	46645640	46646026	17	chr2	46645826	46645845	-	primary.p53+p63RE	9.64757	TCTTGCCCAGGCATGTAGC
chr2	55839261	55839967	17	chr2	55839690	55839714	-	primary.unique-p63RE	9.3406	CTCAGCAAGTTGCTTCATGTTTTC
chr2	60601010	60601542	17	chr2	60601375	60601394	+	primary.p53+p63RE	9.73144	AGGCATGAGCCAGCATGCC
chr2	60717596	60718193	17	chr2	60717996	60718020	+	primary.unique-p63RE	7.70196	AGAACGTGCTATGACAAGTCTTGA
chr2	69518777	69519202	17	chr2	69518962	69518986	-	primary.unique-p63RE	7.81566	CTGGGCCTGCTGCTGCTGGTAAAA
chr2	73983592	73984053	17	chr2	73983803	73983817	+	secondary.p53+p63RE	8.30761	GCCAGGACTCGCCC
chr2	83851042	83851506	17	chr2	83851278	83851297	+	primary.p53+p63RE	11.0108	AGGCATGCCCCAGCCTGCC
chr2	84894047	84894510	17	chr2	84894293	84894317	+	primary.unique-p63RE	8.38291	CCTTCAAGAAAGGACTTGTCGAAC
chr2	84925368	84926085	17	chr2	84925556	84925580	+	primary.unique-p63RE	8.84275	AGGGCAGGTCTAGGCAAGTGGGGC
chr2	85014570	85015068	17	chr2	85014885	85014904	+	primary.p53+p63RE	9.21233	TTGCATGTTAAAACTTGCA
chr2	85274314	85274741	17	chr2	85274527	85274541	-	secondary.p53+p63RE	7.90253	AGCAAGTCAGGACA
chr2	85956237	85956710	17	chr2	85956488	85956507	-	primary.p53+p63RE	10.6086	TCATGTTCCCACATGCCTG
chr2	95315887	95316648	17	chr2	95316380	95316399	+	primary.p53+p63RE	11.2696	TGGCTTGCCTGAACTTGCA
chr2	96534808	96535188	17	chr2	96534981	96535005	+	primary.unique-p63RE	9.32344	CAGGCAGGTGTTGACTTGCTGAGG
chr2	96698052	96698653	17	chr2	96698383	96698407	+	primary.unique-p63RE	9.1749	AGAACAAGCCCGAACCTGAAGGGA
chr2	100562486	100562979	17	chr2	100562691	100562715	-	primary.unique-p63RE	8.35305	CTTTACAGGTTTGGGCCGGCAGCT
chr2	101185062	101186044	17	chr2	101185241	101185260	-	primary.p53+p63RE	12.6099	ACATGTATGGACAAGCTCT
chr2	101820490	101820965	17	chr2	101820691	101820710	-	primary.p53+p63RE	9.94739	GCCTGTCTTGACAAGCCTC
chr2	105409711	105410085	17	chr2	105409886	105409910	+	primary.unique-p63RE	8.9567	AGAGCAAGCCGACTCATGCCTGGA
chr2	108933491	108934091	17	chr2	108933737	108933761	-	primary.unique-p63RE	9.2514	CAGAGCAAGCTGGGGCAGGCAGCG
chr2	111236071	111236484	17	chr2	111236285	111236309	-	primary.unique-p63RE	8.39062	CTTCTCAGGCCCAGGCTTGCAAAG
chr2	112645094	112645713	17	chr2	112645424	112645438	-	tertiary.unique-p63RE	8.52727	CGTGCCAGAACTGG
chr2	112877150	112877849	17	chr2	112877652	112877666	+	secondary.p53+p63RE	7.86284	GTGTGGGCATGTCA
chr2	113072441	113072994	17	chr2	113072753	113072777	+	primary.unique-p63RE	8.58302	ATGGCAAGATACTACATGTAAGTT
chr2	119240304	119240949	17	chr2	119240657	119240671	-	secondary.p53+p63RE	9.60172	GACAAGCCTGGGCA
chr2	127859671	127860113	17	chr2	127859849	127859873	-	primary.unique-p63RE	8.69066	AGGAACCTGCCCAGACCTGAAGGG
chr2	128805230	128805678	17	chr2	128805470	128805489	+	primary.p53+p63RE	9.51728	GCACATGTCACAACTTGTA
chr2	145060638	145061292	17	chr2	145061012	145061036	+	primary.unique-p63RE	9.04326	CCTACAAGATAGGACTTGTTGACT
chr2	149027769	149028335	17	chr2	149027999	149028023	-	primary.unique-p63RE	8.49676	TGTGACAGGTCGTGTCTTGTTATT
chr2	152200597	152201017	17	-	-	-		Other	0	-
chr2	159124702	159125163	17	chr2	159124876	159124890	+	tertiary.unique-p63RE	8.85309	AAGTACAGGCACGC
chr2	159735672	159736145	17	chr2	159735852	159735871	-	primary.p53+p63RE	10.1002	GCATGTTGGCTCATGCCTG
chr2	160352378	160352913	17	chr2	160352661	160352680	-	primary.p53+p63RE	10.1294	TCAAGTCTGCACATGTCCG
chr2	160647034	160647517	17	chr2	160647270	160647294	+	primary.unique-p63RE	8.53373	CTGGCAGGCTGGTACCTGTTAAGA
chr2	161077877	161078500	17	chr2	161078222	161078241	+	primary.p53+p63RE	12.1323	AGGCTTGTCTTGGCTTGTC
chr2	164839914	164840519	17	chr2	164840070	164840089	-	primary.p53+p63RE	10.6653	ACATGCTGTGACTTGCTTC
chr2	168991990	168992622	17	chr2	168992182	168992206	+	primary.unique-p63RE	9.46648	AAAGCAAGACAAGACATGTGCAGA
chr2	172228249	172228849	17	chr2	172228550	172228574	-	primary.unique-p63RE	9.28818	AGCAACATGCTCGCACTTGAAAAA
chr2	172442421	172443050	17	chr2	172442814	172442833	+	primary.p53+p63RE	10.5148	GAGCATGTGTGAGCTTGTT
chr2	172857978	172858327	17	chr2	172858135	172858159	+	primary.unique-p63RE	8.73612	ACAACAAGACCAGGCTTGAGCAAT
chr2	173355922	173356523	17	chr2	173356261	173356280	-	primary.p53+p63RE	9.41679	GCTTGTGCTGACTTGTTAA
chr2	176106521	176107082	17	chr2	176106696	176106720	+	primary.unique-p63RE	8.46851	TGAACAAGAAGCAACAAGCTCCCA
chr2	191305054	191305858	17	chr2	191305680	191305699	-	primary.p53+p63RE	9.33217	GCATGTCCTGGTTTGCCCT
chr2	195622862	195623296	17	chr2	195623012	195623031	+	primary.p53+p63RE	9.67015	ATTCATGTCTGGGCTTGAA
chr2	201642623	201643002	17	chr2	201642802	201642821	-	primary.p53+p63RE	10.3818	GCCAGTCCAGACTAGCCCT
chr2	203578942	203579584	17	chr2	203579215	203579239	-	primary.unique-p63RE	8.19548	CTGAGCCAGTCTGCACAGGTCCCT
chr2	209422250	209422607	17	chr2	209422401	209422420	-	primary.p53+p63RE	9.54565	GCATGCCTGGTCATGAATG
chr2	216659135	216659800	17	chr2	216659524	216659543	+	primary.p53+p63RE	10.8413	GAGCTTGCTGGGGCTTGTC
chr2	219217873	219218625	17	chr2	219218293	219218317	+	primary.unique-p63RE	8.07187	ACGACAAGCAGCCACAGGCCACAG
chr2	227889309	227889711	17	chr2	227889516	227889535	+	primary.p53+p63RE	10.4467	GAACATGTTTCAGCATGAA
chr2	229363202	229363885	17	chr2	229363596	229363615	-	primary.p53+p63RE	10.0314	GCATGCAGGAGCTTGCCCG
chr2	230219807	230220354	17	chr2	230220063	230220087	-	primary.unique-p63RE	9.05191	GAAGGCAGGTCGGTGCCTGCAGCC
chr2	233139465	233140062	17	chr2	233139698	233139712	+	secondary.p53+p63RE	10.0338	GCCCGGGCTTGTCC
chr2	234133003	234133564	17	chr2	234133242	234133266	-	primary.unique-p63RE	8.47696	CTGAGCAAGTGTGGTCCTGTCAGA
chr2	236769822	236770898	17	chr2	236770615	236770639	+	primary.unique-p63RE	9.77011	GGGGCAGGTGGAAGCATGCACAGC
chr2	237298524	237299061	17	chr2	237298836	237298860	-	primary.unique-p63RE	9.46199	ATGAACCTGTCTCTACCTGCCTCT
chr2	240441330	240442006	17	chr2	240441704	240441728	+	primary.unique-p63RE	8.49272	GGAACAGGCCTGGGCAGGTGCCCT
chr20	298341	298886	17	chr20	298709	298733	+	primary.unique-p63RE	8.37772	GTGGCAAGCGAGGACACGCCTTTG
chr20	1569328	1569808	17	chr20	1569467	1569486	-	primary.p53+p63RE	9.37534	GCATGCGTGAGCAAGTTTT
chr20	5119530	5120454	17	chr20	5120176	5120195	-	primary.p53+p63RE	10.0781	ACAAGTCCGGGCATATGTG
chr20	11850538	11851435	17	chr20	11851042	11851061	+	primary.p53+p63RE	9.45311	AGGCAAGAATGGGCTTGTT
chr20	21496439	21496901	17	chr20	21496625	21496639	+	secondary.p53+p63RE	8.22391	GCCTGGACTTGTTG
chr20	23155041	23155489	17	chr20	23155197	23155216	-	primary.p53+p63RE	12.2836	ACCTGTCTAAACATGCCTA
chr20	23583560	23583952	17	chr20	23583722	23583741	-	primary.p53+p63RE	10.0736	ACAAGCTGGTGCATGTTCT
chr20	31678434	31679142	17	chr20	31678772	31678791	-	primary.p53+p63RE	11.9414	ACTAGTCCAGACAAGTCCC
chr20	34335679	34336191	17	chr20	34335862	34335881	-	primary.p53+p63RE	9.87244	ACCTGTGGGTACATGCCTG
chr20	35171553	35172102	17	chr20	35171887	35171911	+	primary.unique-p63RE	8.31163	AAGGCAGGTCTGGGCAGGAGGGAG
chr20	40176389	40176846	17	chr20	40176632	40176656	-	primary.unique-p63RE	9.56748	GGCCACAGGTTTGAGCATGTAGAC
chr20	41133707	41134352	17	chr20	41134046	41134065	-	primary.p53+p63RE	11.8778	GCATGCTGAAGCATGCATG
chr20	44678199	44678970	17	chr20	44678426	44678445	+	primary.p53+p63RE	12.3465	AGACAGGTCTGGACTTGTC
chr20	44956369	44956814	17	chr20	44956603	44956622	-	primary.p53+p63RE	10.6907	ACCTGTTCAGGCTTGTTGG
chr20	46139763	46140264	17	chr20	46140052	46140071	+	secondary.unique-p63RE	10.6241	TTTTGTTTGTACATGCCCT
chr20	46377532	46377910	17	chr20	46377702	46377726	-	primary.unique-p63RE	9.34058	GTGATCATGTCCAGTCCTGTAGCT
chr20	47665248	47665675	17	chr20	47665422	47665441	-	primary.p53+p63RE	12.2311	GCAAGCACCGGCATGTCTG
chr20	47927476	47927934	17	chr20	47927723	47927747	+	primary.unique-p63RE	7.91872	CTGGCATGTGGGCACTAGTTGACC
chr20	49381519	49382021	17	chr20	49381719	49381743	+	primary.unique-p63RE	8.21073	AGCTCAGGCCTGGACAGGCCTCTG
chr20	49834943	49835591	17	chr20	49835245	49835264	-	primary.p53+p63RE	13.1967	GCATGTACAAGCATGTTCA
chr20	50430442	50431005	17	chr20	50430812	50430831	-	secondary.unique-p63RE	9.75475	GAACAAGCCCCAACAGTTC
chr20	51020019	51020558	17	chr20	51020369	51020388	+	primary.p53+p63RE	9.70375	GAGCATGATCGGACCTGCC
chr20	51360862	51361469	17	chr20	51361152	51361176	+	primary.unique-p63RE	8.8609	GAGTCAAGTTGTGGCAGGCCTGAT
chr20	53757487	53758046	17	chr20	53757718	53757732	+	tertiary.unique-p63RE	6.40516	CTGCACAGACACGC
[truncated: 30,536 more rows]

## Sheet: p63associatedGeneTSS
p63peak_Chromosome	p63peak_Start	p63peak_End	Number of supporting p63 ChIP-seq datasets	RefSeqID	Gene Symbol	distance
chr1	161074451	161075357	20	NM_001025598	ARHGAP30	4934
chr1	161074451	161075357	20	NM_001287600	ARHGAP30	4934
chr1	161074451	161075357	20	NM_001287602	ARHGAP30	4934
chr1	161074451	161075357	20	NM_181720	ARHGAP30	4934
chr1	200669441	200670347	20	NR_110787	LOC101929224	388
chr1	200669441	200670347	20	NM_001031725	DDX59	-104
chr1	206001839	206002563	20	NM_001304839	RAB7B	-1265
chr1	206001839	206002563	20	NM_001164522	RAB7B	-1265
chr1	23167389	23167912	20	NM_001142546	LUZP1	-1208
chr1	23167389	23167912	20	NM_033631	LUZP1	-1208
chr1	31574872	31575935	20	NM_022164	TINAGL1	-1081
chr1	31574872	31575935	20	NM_001204414	TINAGL1	-1081
chr1	31574872	31575935	20	NM_001204415	TINAGL1	-2741
chr1	93592997	93593374	20	NR_034091	LOC100129046	1218
chr10	1054750	1055124	20	NM_014023	WDR37	-1898
chr10	121596929	121597880	20	NM_001144915	FGFR2	759
chr10	121596929	121597880	20	NM_001144916	FGFR2	3146
chr10	121596929	121597880	20	NM_023029	FGFR2	3437
chr10	121596929	121597880	20	NM_001144917	FGFR2	-1054
chr10	121596929	121597880	20	NM_001144913	FGFR2	3437
chr10	121596929	121597880	20	NM_022970	FGFR2	-1054
chr10	121596929	121597880	20	NM_000141	FGFR2	-1054
chr10	121596929	121597880	20	NM_001144914	FGFR2	3437
chr10	121596929	121597880	20	NR_073009	FGFR2	-1054
chr10	121596929	121597880	20	NM_001144918	FGFR2	-1054
chr10	121596929	121597880	20	NM_001144919	FGFR2	-1054
chr10	70146617	70147413	20	NR_073582	TYSND1	275
chr10	70146617	70147413	20	NR_073595	TYSND1	2287
chr10	70146617	70147413	20	NR_073591	TYSND1	275
chr10	70146617	70147413	20	NM_173555	TYSND1	275
chr10	70146617	70147413	20	NR_073594	TYSND1	275
chr10	70146617	70147413	20	NR_073593	TYSND1	275
chr10	70146617	70147413	20	NR_073580	TYSND1	275
chr10	70146617	70147413	20	NM_001040273	TYSND1	275
chr10	70146617	70147413	20	NR_073592	TYSND1	275
chr10	70146617	70147413	20	NR_073581	TYSND1	275
chr10	86968179	86968789	20	NM_006829	ADIRF	54
chr10	86968179	86968789	20	NM_133447	AGAP11	-2256
chr11	113446737	113447340	20	NR_036183	MIR4301	-3050
chr11	1830348	1831231	20	NM_001290332	SYT8	-3520
chr11	1830348	1831231	20	NM_001290334	SYT8	-3520
chr11	1830348	1831231	20	NM_001290333	SYT8	-3520
chr11	1830348	1831231	20	NM_138567	SYT8	-3520
chr11	20050455	20051159	20	NR_046672	NAV2-AS2	1504
chr11	534367	535154	20	NM_176795	HRAS	-790
chr11	534367	535154	20	NM_005343	HRAS	-790
chr11	534367	535154	20	NM_001130442	HRAS	-790
chr11	534367	535154	20	NM_198075	LRRC56	-2761
chr11	63985940	63986639	20	NM_017670	OTUB1	437
chr11	63985940	63986639	20	NR_003089	OTUB1	437
chr11	65381826	65382576	20	NM_001077241	SLC25A45	-473
chr11	65381826	65382576	20	NM_001278251	SLC25A45	-1500
chr11	65381826	65382576	20	NM_001300833	FRMD8	-4368
chr11	65381826	65382576	20	NM_001300832	FRMD8	-4368
chr11	65381826	65382576	20	NM_182556	SLC25A45	-473
chr11	65381826	65382576	20	NM_001300820	SLC25A45	-185
chr11	65381826	65382576	20	NM_001278250	SLC25A45	-185
chr11	65381826	65382576	20	NM_031904	FRMD8	-4368
chr11	65420953	65421741	20	NR_028272	NEAT1	-1450
chr12	120264262	120265116	20	NM_001243756	PXN	-1082
chr12	120264262	120265116	20	NM_001080855	PXN	-1082
chr12	120264262	120265116	20	NM_002859	PXN	-1082
chr12	68808639	68809264	20	NM_002392	MDM2	780
chr12	68808639	68809264	20	NM_001278462	MDM2	-65
chr12	68808639	68809264	20	NM_001145337	MDM2	-65
chr12	68808639	68809264	20	NM_001145339	MDM2	780
chr12	68808639	68809264	20	NR_073494	LOC100130075	3457
chr12	68808639	68809264	20	NM_001145340	MDM2	-65
chr14	22979032	22979764	20	NM_198086	AJUBA	2175
chr14	22979032	22979764	20	NM_001289097	AJUBA	-3244
chr14	22979032	22979764	20	NM_032876	AJUBA	-3244
chr16	81499543	81500183	20	NM_030629	CMIP	4515
chr16	81531136	81532010	20	NR_107008	MIR7854	-2328
chr16	84501164	84501841	20	NM_020947	TLDC1	-3180
chr17	28407301	28408209	20	NM_080669	SLC46A1	1543
chr17	28407301	28408209	20	NM_001242366	SLC46A1	1543
chr17	28896713	28897637	20	NM_004475	FLOT2	-522
chr17	40193994	40194872	20	NR_106927	MIR6867	837
chr17	57901238	57901874	20	NM_001292025	CUEDC1	-1833
chr17	61411887	61412730	20	NM_203425	C17orf82	558
chr17	7354091	7354818	20	NM_001002914	KCTD11	2566
chr17	7354091	7354818	20	NM_198154	TMEM95	-723
chr18	63476523	63477089	20	NM_002639	SERPINB5	-104
chr19	14525571	14526379	20	NM_138501	TECR	-3591
chr19	14525571	14526379	20	NR_038104	TECR	-3591
chr19	14525571	14526379	20	NR_030369	MIR639	-3567
chr19	14525571	14526379	20	NR_038103	TECR	-3591
chr19	19776295	19776978	20	NR_026956	LINC00663	223
chr19	3154781	3155460	20	NR_110670	LOC100996351	-55
chr19	33298362	33298920	20	NM_001285829	CEBPA	-3923
chr19	33298362	33298920	20	NM_004364	CEBPA	-3923
chr19	33298362	33298920	20	NM_001287424	CEBPA	-3923
chr19	33298362	33298920	20	NM_001287435	CEBPA	-3923
chr19	33298362	33298920	20	NR_026887	CEBPA-AS1	-4215
chr19	38786619	38787217	20	NM_001042507	LGALS7B	-2291
chr19	41218359	41219222	20	NM_001699	AXL	-408
chr19	41218359	41219222	20	NM_021913	AXL	-408
chr19	45231674	45232505	20	NM_138568	EXOC3L2	-2122
chr19	45400156	45400656	20	NM_006663	PPP1R13L	-4648
chr19	49765952	49766602	20	NM_021733	TSKS	3019
chr19	49765952	49766602	20	NM_014203	AP2A1	-645
chr19	49765952	49766602	20	NM_130787	AP2A1	-645
chr20	35411612	35412350	20	NM_018244	UQCC1	-161
chr20	35411612	35412350	20	NM_199487	UQCC1	-161
chr20	35411612	35412350	20	NM_001184977	UQCC1	-161
chr20	62349883	62350703	20	NR_109922	LAMA5-AS1	-2716
chr20	62349883	62350703	20	NR_109923	LAMA5-AS1	-2716
chr20	62349883	62350703	20	NR_109924	LAMA5-AS1	-2716
chr22	30399908	30400574	20	NM_033382	SEC14L2	3301
chr22	30399908	30400574	20	NM_012429	SEC14L2	3301
chr22	30399908	30400574	20	NM_001204204	SEC14L2	3301
chr22	30399908	30400574	20	NM_001291932	SEC14L2	3301
chr3	12759142	12759927	20	NM_001284407	TMEM40	225
chr3	12759142	12759927	20	NM_018306	TMEM40	225
chr3	12759142	12759927	20	NM_001284408	TMEM40	225
chr3	189833793	189834544	20	NR_030642	MIR944	4247
chr3	48432306	48433062	20	NM_001130082	PLXNB1	2633
chr3	48432306	48433062	20	NM_002673	PLXNB1	3221
chr3	48598777	48599653	20	NM_000094	COL7A1	4055
chr3	50157727	50158385	20	NM_004186	SEMA3F	2642
chr4	10021314	10021745	20	NM_020041	SLC2A9	39
chr5	77879706	77880318	20	NR_105012	LOC101929154	-4643
chr6	47788135	47788595	20	NR_033806	OPN5	1298
chr7	100272048	100272504	20	NR_028038	GATS	44
chr7	100272048	100272504	20	NM_178831	GATS	44
chr7	100272048	100272504	20	NR_028040	GATS	44
chr7	100272048	100272504	20	NR_028039	GATS	44
chr7	5525923	5526634	20	NM_001101	ACTB	-4323
chr8	127401135	127401727	20	NR_109834	CCAT2	1033
chr8	144448003	144448739	20	NM_013432	TONSL	3942
chr8	66124007	66124717	20	NM_033058	TRIM55	-2680
chr8	66124007	66124717	20	NM_184086	TRIM55	-2680
chr8	66124007	66124717	20	NM_184085	TRIM55	-2680
chr8	66124007	66124717	20	NM_184087	TRIM55	-2680
chr9	109449162	109449745	20	NM_001145370	PTPN3	-1931
chr9	109449162	109449745	20	NM_001145369	PTPN3	-1931
chr9	116686809	116687702	20	NM_001184734	ASTN2	-8
chr9	116686809	116687702	20	NM_001099679	TRIM32	-46
chr9	116686809	116687702	20	NM_198186	ASTN2	40
chr9	116686809	116687702	20	NM_001184735	ASTN2	-8
chr9	116686809	116687702	20	NM_198188	ASTN2	-8
chr9	116686809	116687702	20	NM_012210	TRIM32	-46
chr9	116686809	116687702	20	NM_198187	ASTN2	-8
chr1	115771642	115772298	19	NM_001232	CASQ2	3165
chr1	1217866	1218386	19	NM_003327	TNFRSF4	3958
chr1	12618162	12618904	19	NM_004753	DHRS3	802
chr1	1421146	1421764	19	NM_001146685	TMEM88B	-4672
chr1	1421146	1421764	19	NM_001243536	ANKRD65	11
chr1	1421146	1421764	19	NM_001243535	ANKRD65	11
chr1	1421146	1421764	19	NM_001145210	ANKRD65	11
chr1	152785849	152786503	19	NM_178353	LCE1E	-100
chr1	152811057	152811511	19	NM_178349	LCE1B	-686
chr1	152811057	152811511	19	NM_178351	LCE1C	4653
chr1	152811057	152811511	19	NM_001276331	LCE1C	4653
chr1	16925503	16926027	19	NM_014675	CROCC	3816
chr1	201986922	201987344	19	NM_020216	RNPEP	4496
chr1	232952803	232953489	19	NM_032324	NTPCR	2523
chr1	27342638	27343456	19	NM_001193308	SYTL1	1056
chr1	27342638	27343456	19	NM_032872	SYTL1	1056
chr1	32963726	32964293	19	NM_001300826	RNF19B	-804
chr1	32963726	32964293	19	NM_001127361	RNF19B	-804
chr1	32963726	32964293	19	NM_153341	RNF19B	-804
chr1	34755013	34755872	19	NM_005268	GJB5	396
chr1	34755013	34755872	19	NM_153212	GJB4	-4298
chr1	3690229	3690866	19	NM_001204189	TP73	-124
chr1	3690229	3690866	19	NM_001126240	TP73	-124
chr1	3690229	3690866	19	NM_001204190	TP73	-124
chr1	3690229	3690866	19	NM_001204191	TP73	-124
chr1	3690229	3690866	19	NM_001126242	TP73	-124
chr1	3690229	3690866	19	NM_001126241	TP73	-124
chr1	3698702	3699504	19	NM_001204192	TP73	1058
chr1	58572484	58573221	19	NM_002353	TACSTD2	-4642
chr1	59015635	59016356	19	NR_110626	LINC01358	-4480
chr1	6488665	6489492	19	NM_001265593	PLEKHG5	3609
chr1	6488665	6489492	19	NM_001265594	PLEKHG5	-1516
chr1	6488665	6489492	19	NM_020631	PLEKHG5	-2623
chr1	6488665	6489492	19	NM_001042664	PLEKHG5	-1502
chr1	6488665	6489492	19	NM_001042665	PLEKHG5	3124
chr1	67686395	67687019	19	NM_001199742	GADD45A	1531
chr1	67686395	67687019	19	NM_001199741	GADD45A	1531
chr1	67686395	67687019	19	NM_001924	GADD45A	1531
chr10	1059832	1060324	19	NM_014023	WDR37	3243
chr10	89644821	89645747	19	NM_148977	PANK1	-288
chr10	89644821	89645747	19	NM_148978	PANK1	1393
chr10	89644821	89645747	19	NM_138316	PANK1	1393
chr11	113384540	113385015	19	NM_178510	ANKK1	-3013
chr11	120135707	120136451	19	NM_012101	TRIM29	-2076
chr11	1307177	1307620	19	NM_019009	TOLLIP	-2264
chr11	1307177	1307620	19	NR_029409	TOLLIP-AS1	-2309
chr11	62599745	62600406	19	NM_004739	MTA2	-1765
chr11	64842142	64843571	19	NM_017525	CDC42BPG	-1713
chr11	65592596	65593470	19	NM_005714	KCNK7	-2963
chr11	65592596	65593470	19	NM_033455	KCNK7	-2963
chr11	65592596	65593470	19	NM_033348	KCNK7	-2963
chr11	65592596	65593470	19	NM_033347	KCNK7	-2963
chr11	66339064	66339425	19	NM_004292	RIN1	2715
chr11	70063452	70064134	19	NR_120530	LOC101928443	-131
chr11	70063452	70064134	19	NR_120529	LOC101928443	-1578
chr11	803925	804847	19	NM_145887	PIDD1	-864
chr11	803925	804847	19	NM_145886	PIDD1	-864
chr12	103493162	103493664	19	NM_001278420	C12orf42	-2597
chr12	103493162	103493664	19	NM_001099336	C12orf42	-2597
chr12	103493162	103493664	19	NM_198521	C12orf42	-2597
chr12	103493162	103493664	19	NR_103526	C12orf42	-2597
chr12	103493162	103493664	19	NM_001278419	C12orf42	-2597
chr12	38904762	38905473	19	NM_153634	CPNE8	-501
chr12	57521959	57522583	19	NM_001195057	DDIT3	1754
chr12	57521959	57522583	19	NM_001195055	DDIT3	1754
chr12	57521959	57522583	19	NM_052897	MBD6	-604
chr12	57521959	57522583	19	NM_001195054	DDIT3	1754
chr12	57521959	57522583	19	NM_001195053	DDIT3	1754
chr12	57521959	57522583	19	NM_001195056	DDIT3	1754
chr12	57521959	57522583	19	NR_030346	MIR616	3012
chr12	57521959	57522583	19	NM_004083	DDIT3	1754
chr14	105097383	105097951	19	NR_110546	LOC102723354	3521
chr14	21041826	21042498	19	NM_032572	RNASE7	-63
chr14	22839016	22839775	19	NM_004995	MMP14	2863
chr14	51488599	51489288	19	NM_001042481	FRMD6	-177
chr15	43219018	43219639	19	NM_000119	EPB42	-1797
chr15	43219018	43219639	19	NM_001114134	EPB42	-1797
chr15	63385762	63386274	19	NM_001218	CA12	3908
chr15	63385762	63386274	19	NM_206925	CA12	3908
chr15	63385762	63386274	19	NR_120375	LOC102723344	-4211
chr15	63385762	63386274	19	NM_001293642	CA12	3908
chr16	2468242	2469010	19	NM_006181	NTN3	-2872
chr16	2468242	2469010	19	NR_106826	MIR6768	4660
chr16	30950000	30950677	19	NM_152288	ORAI3	1255
chr16	592294	593159	19	NM_021168	RAB40C	2554
chr16	592294	593159	19	NM_001172663	RAB40C	3370
chr16	592294	593159	19	NM_001172665	RAB40C	2650
chr16	592294	593159	19	NM_001172664	RAB40C	3058
chr16	592294	593159	19	NM_001172666	RAB40C	2650
chr16	676741	677484	19	NM_005861	STUB1	-2998
chr16	676741	677484	19	NM_001278720	RHBDL1	1447
chr16	676741	677484	19	NM_001278721	RHBDL1	1447
chr16	676741	677484	19	NM_001293197	STUB1	-2998
chr17	19752961	19753590	19	NM_000691	ALDH3A1	4842
chr17	28742984	28743668	19	NM_004295	TRAF4	-678
chr17	40176445	40177357	19	NM_016339	RAPGEFL1	-1087
chr17	40176445	40177357	19	NM_001303534	RAPGEFL1	-175
chr17	40176445	40177357	19	NM_001303533	RAPGEFL1	-108
chr17	45047241	45047603	19	NM_001128631	DCAKD	-4239
chr17	45047241	45047603	19	NM_001288655	DCAKD	-4095
chr17	56982279	56982787	19	NM_021626	SCPEP1	4427
chr17	57523848	57524488	19	NR_110808	LOC101927557	571
chr17	65058350	65058984	19	NM_006572	GNA13	1865
chr17	65058350	65058984	19	NM_001282425	GNA13	2893
chr17	76586753	76587355	19	NM_006456	ST6GALNAC2	991
chr17	77285767	77286804	19	NM_001293695	SEPT9	4876
chr17	77285767	77286804	19	NM_001113492	SEPT9	-1605
chr17	77285767	77286804	19	NM_001113491	SEPT9	4876
chr17	77454133	77454865	19	NM_001293697	SEPT9	3256
chr17	77454133	77454865	19	NM_001113496	SEPT9	3969
chr17	77454133	77454865	19	NM_001293698	SEPT9	507
chr17	82835963	82836506	19	NM_024702	ZNF750	-3821
chr18	61896733	61897310	19	NM_173557	RNF152	3950
chr18	80245885	80246612	19	NM_032510	PARD6G	-1266
chr19	38775192	38775818	19	NM_002307	LGALS7	1988
chr19	40718922	40719442	19	NM_025194	ITPKC	2080
chr19	40718922	40719442	19	NM_024876	ADCK4	2297
chr19	40718922	40719442	19	NM_001142555	ADCK4	4076
chr19	42270749	42271082	19	NM_001304815	CIC	2379
chr19	46206132	46206796	19	NR_027003	DKFZp434J0226	-3777
chr2	201118553	201119087	19	NM_001202519	CFLAR	2667
chr2	201118553	201119087	19	NM_001127183	CFLAR	275
chr2	201118553	201119087	19	NM_003879	CFLAR	2667
chr2	201118553	201119087	19	NM_001127184	CFLAR	2667
chr2	201118553	201119087	19	NM_001202516	CFLAR	2667
chr2	201118553	201119087	19	NM_001202517	CFLAR	2667
chr2	233691092	233691842	19	NM_205862	UGT1A6	-207
chr2	233691092	233691842	19	NM_001072	UGT1A6	-1398
chr2	73776904	73777582	19	NM_003584	DUSP11	-2914
chr20	37526036	37526706	19	NM_001167823	BLCAP	1820
chr20	37526036	37526706	19	NM_001167821	BLCAP	-1361
chr20	37526036	37526706	19	NM_001167820	BLCAP	-1560
chr20	37526036	37526706	19	NM_001167822	BLCAP	-1310
chr20	37526036	37526706	19	NM_006698	BLCAP	-1560
chr20	56359339	56360362	19	NM_080821	FAM210B	924
chr20	62856785	62857668	19	NM_006602	TCFL5	-4537
chr20	62856785	62857668	19	NM_001301726	TCFL5	-4537
chr20	7347076	7347943	19	NR_110610	LOC101929312	77
chr22	23903223	23903681	19	NR_038911	MIF-AS1	4522
chr22	26567951	26568642	19	NM_001008566	TPST2	2892
chr22	29070983	29072075	19	NM_032045	KREMEN1	-1548
chr22	29070983	29072075	19	NM_001039570	KREMEN1	-1548
chr22	37749873	37750343	19	NM_007032	TRIOBP	3875
chr22	37749873	37750343	19	NM_138632	TRIOBP	3875
chr3	122789761	122790386	19	NM_032839	DIRC2	-4980
chr3	122789761	122790386	19	NM_024610	HSPBAP1	-3746
chr3	143851094	143851833	19	NM_173653	SLC9A9	2932
chr3	156680955	156681444	19	NM_001184718	TIPARP	4536
chr3	49358339	49358872	19	NM_201397	GPX1	247
chr3	49358339	49358872	19	NM_000581	GPX1	247
chr3	49803543	49804382	19	NM_203370	FAM212A	709
chr3	49803543	49804382	19	NR_049825	MIR5193	-2283
chr3	49803543	49804382	19	NM_001007540	CDHR4	4127
chr3	52053422	52054303	19	NM_001947	DUSP7	-2583
chr4	2937020	2937870	19	NM_001146069	MFSD10	2586
chr4	2937020	2937870	19	NR_015453	NOP14-AS1	1900
chr4	2937020	2937870	19	NM_001120	MFSD10	3208
chr4	3436859	3437314	19	NM_001528	HGFAC	-4846
chr4	3436859	3437314	19	NM_001297439	HGFAC	-4846
chr4	3484535	3485255	19	NM_001256896	DOK7	352
chr5	134110409	134110919	19	NM_213648	TCF7	-4942
chr5	134110409	134110919	19	NM_201632	TCF7	-4942
chr5	134110409	134110919	19	NM_201634	TCF7	-4942
chr5	134110409	134110919	19	NR_033449	TCF7	-4994
chr5	134110409	134110919	19	NM_003202	TCF7	-4046
chr5	134110409	134110919	19	NM_001134851	TCF7	-4942
chr5	140557253	140557907	19	NM_001253764	SRA1	124
chr5	140557253	140557907	19	NR_045586	SRA1	-513
chr5	140557253	140557907	19	NR_045587	SRA1	124
chr5	140557253	140557907	19	NM_001035235	SRA1	-513
chr5	151572543	151573262	19	NM_001447	FAT2	3958
chr5	163437542	163438209	19	NM_199246	CCNG1	305
chr5	163437542	163438209	19	NM_004060	CCNG1	305
chr6	111483836	111484404	19	NR_034111	TRAF3IP2-AS1	649
chr6	111483836	111484404	19	NM_001286431	REV3L	405
chr6	111483836	111484404	19	NR_034110	TRAF3IP2-AS1	649
chr6	111483836	111484404	19	NR_034108	TRAF3IP2-AS1	649
chr6	111483836	111484404	19	NM_001286432	REV3L	405
chr6	111483836	111484404	19	NR_034109	TRAF3IP2-AS1	649
chr6	111483836	111484404	19	NM_002912	REV3L	405
chr6	35297752	35298592	19	NM_022047	DEF6	355
chr6	36676053	36676840	19	NM_078467	CDKN1A	-43
chr6	36676053	36676840	19	NM_001220778	CDKN1A	-2263
chr6	36676053	36676840	19	NM_001291549	CDKN1A	-90
chr6	36676053	36676840	19	NM_000389	CDKN1A	-2232
chr6	36676053	36676840	19	NR_109836	PANDAR	1320
chr6	36676053	36676840	19	NM_001220777	CDKN1A	-13
chr6	36682339	36683030	19	NM_001220778	CDKN1A	3975
chr6	36682339	36683030	19	NM_000389	CDKN1A	4006
chr6	54846258	54846813	19	NM_001010872	FAM83B	-235
chr6	63573228	63574180	19	NM_003463	PTP4A1	1693
chr7	44797187	44797931	19	NM_001300981	PPIA	924
chr7	44797187	44797931	19	NM_021130	PPIA	924
chr7	4683083	4684175	19	NM_001037165	FOXK1	1331
chr7	7100152	7100853	19	NR_034022	LOC100131257	3716
chr7	73838364	73838983	19	NM_152559	WBSCR27	-3852
chr8	143738314	143739055	19	NM_198488	FAM83H	4940
chr8	143738314	143739055	19	NR_033849	FAM83H-AS1	4545
chr9	127566163	127566806	19	NM_022833	FAM129B	-2633
chr9	129278231	129279068	19	NR_121587	LOC101929331	-3766
chr9	129331925	129332635	19	NR_120686	LINC01503	-4642
chr9	129331925	129332635	19	NR_120685	LINC01503	-4642
chr9	131714067	131714439	19	NM_198679	RAPGEF1	4411
chr9	134379758	134380700	19	NM_001291920	RXRA	935
chr9	134379758	134380700	19	NR_039816	MIR4669	819
chr9	35905736	35906374	19	NR_024283	LINC00961	-3427
chr9	35905736	35906374	19	NM_001039792	HRCT1	-136
chr1	110476980	110477679	18	NR_003599	CYMP	-3436
chr1	116693756	116694328	18	NM_001013643	C1orf137	-69
chr1	12232291	12232634	18	NM_015378	VPS13D	2424
chr1	12232291	12232634	18	NM_018156	VPS13D	2424
chr1	1250730	1251298	18	NM_001014980	FAM132A	4292
chr1	150624078	150624802	18	NM_207047	ENSA	-4693
chr1	150624078	150624802	18	NM_207045	ENSA	-4693
chr1	150624078	150624802	18	NM_207046	ENSA	-4693
chr1	151058478	151059218	18	NM_006818	MLLT11	-826
chr1	151058478	151059218	18	NM_020239	CDC42SE1	-801
chr1	151058478	151059218	18	NM_001038707	CDC42SE1	-801
chr1	151713673	151714241	18	NM_001291106	CELF3	-2863
chr1	151713673	151714241	18	NM_001291107	CELF3	-2863
chr1	151713673	151714241	18	NM_001172648	CELF3	-2359
chr1	151713673	151714241	18	NM_001172649	CELF3	-2863
chr1	151713673	151714241	18	NM_007185	CELF3	-2863
chr1	153615222	153616025	18	NM_020672	S100A14	-709
chr1	153615222	153616025	18	NM_080388	S100A16	2585
chr1	154320821	154321204	18	NM_080429	AQP10	-103
chr1	154320821	154321204	18	NM_001005855	ATP8B2	-4547
chr1	159009585	159010382	18	NM_005531	IFI16	92
chr1	159009585	159010382	18	NM_001206567	IFI16	92
chr1	165903549	165904157	18	NR_037431	MIR3658	-4067
chr1	172138505	172139069	18	NR_036066	MIR3120	-20
chr1	172138505	172139069	18	NR_029627	MIR214	-120
chr1	200894690	200895095	18	NM_018265	C1orf106	3394
chr1	200894690	200895095	18	NM_001142569	C1orf106	72
chr1	201397018	201397543	18	NM_005558	LAD1	-2261
chr1	201468610	201469546	18	NR_073080	PHLDA3	-93
chr1	201468610	201469546	18	NM_012396	PHLDA3	-93
chr1	203306433	203306877	18	NR_034151	LINC01136	1330
chr1	203306433	203306877	18	NR_034150	LINC01136	1330
chr1	203306433	203306877	18	NM_006763	BTG2	1120
chr1	205258723	205259471	18	NM_001297613	TMCC2	2897
chr1	21974765	21975151	18	NM_007352	CELA3B	-1966
chr1	228486528	228487299	18	NM_001010858	RNF187	-453
chr1	235067604	235068616	18	NR_027454	LINC01348	-1708
chr1	24317018	24317384	18	NM_198173	GRHL3	-2120
chr1	24317018	24317384	18	NM_001195010	GRHL3	-2364
chr1	24317018	24317384	18	NM_198174	GRHL3	-2120
chr1	3857304	3857773	18	NM_004402	DFFB	272
chr1	3857304	3857773	18	NM_001282669	DFFB	272
chr1	3857304	3857773	18	NR_104222	DFFB	272
chr1	3857304	3857773	18	NM_014704	CEP104	305
chr1	46218419	46219022	18	NM_001243766	POMGNT1	-1585
chr1	633873	634176	18	NR_106781	MIR6723	1611
chr10	131094535	131095107	18	NR_120623	TCERG1L-AS1	-396
chr10	27500804	27501428	18	NM_021252	RAB18	-3057
chr10	27500804	27501428	18	NM_001256412	RAB18	-3057
chr10	27500804	27501428	18	NM_001256411	RAB18	-3057
chr10	27500804	27501428	18	NR_046172	RAB18	-3057
chr10	27500804	27501428	18	NM_001256415	RAB18	-3057
chr10	27500804	27501428	18	NM_001256410	RAB18	-3057
chr10	72889201	72889834	18	NR_130125	OIT3	-4038
chr10	72889201	72889834	18	NM_152635	OIT3	-4038
chr10	86958689	86959372	18	NM_024756	MMRN2	1362
chr10	86958689	86959372	18	NM_003087	SNCG	500
chr10	88990975	88991540	18	NR_028034	FAS	727
chr10	88990975	88991540	18	NR_028033	FAS	727
chr10	88990975	88991540	18	NM_000043	FAS	727
chr10	88990975	88991540	18	NM_152871	FAS	727
chr10	88990975	88991540	18	NR_028036	FAS	727
chr10	88990975	88991540	18	NM_001141945	ACTA2	-133
chr10	88990975	88991540	18	NR_028371	FAS-AS1	-1718
chr10	88990975	88991540	18	NM_152872	FAS	727
chr10	88990975	88991540	18	NR_028035	FAS	727
chr10	99621243	99621858	18	NM_031212	SLC25A28	1086
chr11	27040159	27040644	18	NM_003986	BBOX1	-560
chr11	44564463	44565293	18	NM_002231	CD82	-712
chr11	44564463	44565293	18	NM_001024844	CD82	-712
chr11	65121907	65122635	18	NR_037568	MRPL49	28
chr11	65121907	65122635	18	NR_037567	MRPL49	89
chr11	65121907	65122635	18	NM_001997	FAU	71
chr11	65121907	65122635	18	NM_014205	ZNHIT2	4533
chr11	65121907	65122635	18	NM_004927	MRPL49	28
chr11	66336490	66337356	18	NM_004292	RIN1	394
chr11	76784382	76785031	18	NR_120561	LOC101928837	1644
chr11	76784382	76785031	18	NR_120562	LOC101928837	1644
chr11	76784382	76785031	18	NM_001258210	TSKU	2394
chr11	76784382	76785031	18	NM_015516	TSKU	1466
chr12	108838224	108838766	18	NR_030350	MIR619	1489
chr12	119667759	119668301	18	NM_006253	PRKAB1	75
chr12	14961483	14962013	18	NM_001175	ARHGDIB	120
chr12	54390158	54390964	18	NM_001290002	ZNF385A	4772
chr12	54390158	54390964	18	NM_001130967	ZNF385A	-744
chr12	54390158	54390964	18	NM_001130968	ZNF385A	-744
chr12	54390158	54390964	18	NM_001290004	ZNF385A	4772
chr12	77065658	77066270	18	NM_203394	E2F7	384
chr12	9872599	9873230	18	NM_005127	CLEC2B	3055
chr13	50529303	50529849	18	NR_125753	DLEU1-AS1	2127
chr14	77033108	77033662	18	NM_024496	IRF2BPL	4686
chr15	100877300	100877977	18	NM_000693	ALDH1A3	-2053
chr15	100877300	100877977	18	NM_001293815	ALDH1A3	-2053
chr15	40359863	40360424	18	NM_033510	DISP2	1911
chr15	41832844	41833235	18	NM_001198588	JMJD7-PLA2G4B	4955
chr15	41832844	41833235	18	NM_005090	JMJD7-PLA2G4B	4955
chr15	41832844	41833235	18	NM_001114632	JMJD7	4955
chr15	50686730	50687327	18	NM_001301212	TRPM7	213
chr15	50686730	50687327	18	NM_017672	TRPM7	213
chr15	63156870	63157679	18	NM_015920	RPS27L	-268
chr15	80580089	80580918	18	NR_049837	MIR5572	-599
chr15	83288406	83289000	18	NM_001717	BNC1	3987
chr15	89379280	89380149	18	NR_015411	LINC00925	1673
chr16	10429208	10429672	18	NR_045815	ATF7IP2	573
chr16	28537044	28537637	18	NM_012385	NUPR1	-1834
chr16	28537044	28537637	18	NM_001042483	NUPR1	-1834
chr16	67961594	67962090	18	NM_001145963	SLC12A4	-2223
chr16	67966186	67966635	18	NM_001145964	SLC12A4	-468
chr16	67966186	67966635	18	NM_001145961	SLC12A4	-2284
chr16	67966186	67966635	18	NM_001145963	SLC12A4	2345
chr16	67966186	67966635	18	NM_001145962	SLC12A4	-2284
chr16	67966186	67966635	18	NM_005072	SLC12A4	-2284
chr16	74291737	74292183	18	NM_002811	PSMD7	-4814
chr17	37361432	37362189	18	NM_198836	ACACA	2694
chr17	44138108	44138690	18	NM_001171251	C17orf53	-3506
chr17	44138108	44138690	18	NM_024032	C17orf53	-3506
chr17	44348784	44349177	18	NM_002087	GRN	3895
chr17	44918031	44918441	18	NM_001131019	GFAP	2684
chr17	44918031	44918441	18	NM_001242376	GFAP	2684
chr17	44918031	44918441	18	NM_002055	GFAP	2684
chr17	51153394	51154109	18	NM_001018136	NME1-NME2	216
chr17	51153394	51154109	18	NR_037149	NME1-NME2	216
chr17	51153394	51154109	18	NM_000269	NME1	193
chr17	51153394	51154109	18	NM_198175	NME1	193
chr17	74872653	74873160	18	NM_001258016	FDXR	4153
chr17	74872653	74873160	18	NR_047576	FDXR	-125
chr17	74872653	74873160	18	NM_024417	FDXR	-125
chr17	74872653	74873160	18	NM_001258013	FDXR	-125
chr17	74872653	74873160	18	NM_004110	FDXR	-125
chr17	74872653	74873160	18	NM_001258015	FDXR	-125
chr17	74872653	74873160	18	NM_001258012	FDXR	-125
chr17	74872653	74873160	18	NM_001258014	FDXR	-125
chr17	76581598	76581912	18	NM_006456	ST6GALNAC2	-4308
chr17	81239676	81240140	18	NM_001086521	C17orf89	598
chr17	81239676	81240140	18	NM_144679	ENTHD2	817
chr18	12309634	12310270	18	NM_001303527	TUBB6	1894
chr18	12309634	12310270	18	NM_001303529	TUBB6	1894
chr18	12309634	12310270	18	NM_001303528	TUBB6	1894
chr18	12309634	12310270	18	NM_001303524	TUBB6	2284
chr18	12309634	12310270	18	NM_001303530	TUBB6	1894
chr18	12309634	12310270	18	NM_001303526	TUBB6	1894
chr18	12309634	12310270	18	NM_001303525	TUBB6	1894
chr18	12309634	12310270	18	NM_032525	TUBB6	1894
chr18	59700227	59700683	18	NM_133459	CCBE1	3043
chr19	1027710	1028658	18	NM_004368	CNN2	1910
chr19	1027710	1028658	18	NM_001303501	CNN2	1910
chr19	1027710	1028658	18	NM_001303499	CNN2	1910
chr19	1027710	1028658	18	NM_201277	CNN2	1910
chr19	38792884	38793562	18	NM_001042507	LGALS7B	4014
chr19	42281205	42281661	18	NM_015125	CIC	-3231
chr19	43759087	43759888	18	NM_019108	SMG9	4497
chr19	46784502	46785113	18	NM_001145145	SLC1A5	-70
chr19	46784502	46785113	18	NM_001145144	SLC1A5	-2481
chr19	46784502	46785113	18	NM_005628	SLC1A5	-3778
chr19	47231172	47231986	18	NM_014417	BBC3	385
chr19	47231172	47231986	18	NR_036158	MIR3190	4638
chr19	47231172	47231986	18	NM_001127242	BBC3	-1187
chr19	47231172	47231986	18	NM_001127241	BBC3	-1187
chr19	47231172	47231986	18	NR_036159	MIR3191	4560
chr19	47231172	47231986	18	NM_001127240	BBC3	-1187
chr19	49064019	49064431	18	NM_006179	NTF4	358
chr19	55643137	55643682	18	NM_016535	ZNF581	-210
chr19	55643137	55643682	18	NM_013301	CCDC106	-4178
chr19	55643137	55643682	18	NM_001163423	ZNF580	1313
chr19	55643137	55643682	18	NM_016202	ZNF580	1358
chr19	55643137	55643682	18	NM_207115	ZNF580	2384
chr2	134131684	134132108	18	NR_037450	MIR3679	4772
chr2	150485241	150485686	18	NM_005168	RND3	-2232
chr2	150485241	150485686	18	NM_001254738	RND3	-2232
chr2	196925518	196926244	18	NM_024989	PGAP1	-849
chr2	240433698	240434402	18	NM_002081	GPC1	-1647
chr2	3558189	3558717	18	NM_001286837	RNASEH1	82
chr2	3558189	3558717	18	NR_038429	RNASEH1-AS1	68
chr2	3558189	3558717	18	NR_038431	RNASEH1-AS1	67
chr2	3558189	3558717	18	NM_001286834	RNASEH1	82
chr2	3558189	3558717	18	NM_002936	RNASEH1	82
chr2	3558189	3558717	18	NR_038430	RNASEH1-AS1	67
chr2	42795839	42796442	18	NM_012205	HAAO	3529
chr2	73925938	73926420	18	NM_080918	DGUOK	-646
chr2	73925938	73926420	18	NM_080916	DGUOK	-646
chr20	3235501	3236337	18	NM_032034	SLC4A11	-1808
chr20	3235501	3236337	18	NM_001174090	SLC4A11	-2270
chr20	3235501	3236337	18	NM_001174089	SLC4A11	-3322
chr20	35451210	35451919	18	NR_031620	MIR1289-1	-2533
chr20	35451210	35451919	18	NM_007186	CEP250	-3837
chr20	36861799	36862577	18	NM_080627	SOGA1	-1496
chr20	36861799	36862577	18	NM_199181	SOGA1	2315
chr20	3893347	3893867	18	NM_024960	PANK2	4769
chr20	3893347	3893867	18	NM_153638	PANK2	4513
chr20	3893347	3893867	18	NM_153640	PANK2	3792
chr20	50729167	50730211	18	NM_032521	PARD6B	-1854
chr20	57262979	57263681	18	NM_001719	BMP7	-3321
chr20	62241367	62241884	18	NM_144498	OSBPL2	3141
chr20	62241367	62241884	18	NM_014835	OSBPL2	3141
chr20	62241367	62241884	18	NM_001278649	OSBPL2	3141
chr20	63255998	63256587	18	NM_152864	NKAIN4	1752
chr20	63255998	63256587	18	NR_024389	FLJ16779	2315
chr21	41751532	41751955	18	NR_106872	MIR6814	4902
chr21	42955408	42956076	18	NR_049889	MIR5692B	4728
chr22	39097051	39097666	18	NM_181773	APOBEC3H	135
chr22	39097051	39097666	18	NM_001166004	APOBEC3H	135
chr22	39097051	39097666	18	NM_001166003	APOBEC3H	135
chr22	39097051	39097666	18	NM_001166002	APOBEC3H	135
chr22	46147729	46148357	18	NM_001001928	PPARA	-2552
chr22	46147729	46148357	18	NM_005036	PPARA	-2552
chr3	151318804	151319353	18	NM_023915	GPR87	2230
chr3	153160454	153161130	18	NM_002886	RAP2B	-1419
chr3	196320066	196320549	18	NM_152773	TCTEX1D2	2013
chr3	196320066	196320549	18	NR_046724	TM4SF19-AS1	1976
chr3	196320066	196320549	18	NR_121665	TM4SF19-AS1	1976
chr4	127783204	127783795	18	NM_014278	HSPA4L	1202
chr4	158170927	158171621	18	NM_016613	FAM198B	-1292
chr4	158170927	158171621	18	NM_001128424	FAM198B	-1776
chr4	158170927	158171621	18	NM_001031700	FAM198B	-1776
chr4	188107894	188108340	18	NM_173553	TRIML2	2530
chr4	188107894	188108340	18	NM_001303419	TRIML2	2530
chr4	52051588	52052304	18	NR_123728	SPATA18	616
chr4	52051588	52052304	18	NM_145263	SPATA18	616
chr4	52051588	52052304	18	NM_001297608	SPATA18	616
chr5	14660253	14660632	18	NM_138348	OTULIN	-4231
chr5	160422934	160423515	18	NM_001282382	PTTG1	1315
chr5	160422934	160423515	18	NM_004219	PTTG1	1418
chr5	160422934	160423515	18	NM_001282383	PTTG1	1315
chr5	160422934	160423515	18	NM_006425	SLU7	4063
chr5	163509223	163509816	18	NM_013283	MAT2B	3992
chr5	73565090	73565792	18	NM_001284431	UTP15	-299
chr5	73565090	73565792	18	NM_032175	UTP15	-299
chr5	73565090	73565792	18	NM_023039	ANKRA2	-245
chr5	73565090	73565792	18	NM_001284430	UTP15	-299
chr6	149900421	149900917	18	NM_001243328	RAET1E	4610
chr6	30690961	30691347	18	NM_007243	NRM	-266
chr6	30690961	30691347	18	NM_001270709	NRM	25
chr6	30690961	30691347	18	NR_073065	NRM	25
chr6	30690961	30691347	18	NM_133471	PPP1R18	3259
chr6	30690961	30691347	18	NR_073066	NRM	25
chr6	30690961	30691347	18	NR_073072	NRM	431
chr6	30690961	30691347	18	NM_001270710	NRM	25
chr6	30690961	30691347	18	NM_001270707	NRM	25
chr6	30690961	30691347	18	NM_001134870	PPP1R18	3838
chr6	30690961	30691347	18	NM_001270708	NRM	25
chr6	30889866	30890718	18	NM_013994	DDR1	1605
chr6	30889866	30890718	18	NM_001202522	DDR1	1605
chr6	30889866	30890718	18	NM_001202521	DDR1	1605
chr6	30889866	30890718	18	NR_039783	MIR4640	-590
chr6	42890214	42891369	18	NM_001008739	C6orf226	-25
chr6	47700034	47700611	18	NM_153838	GPR115	1770
chr7	101126205	101127202	18	NM_000602	SERPINE1	-385
chr7	116500488	116501022	18	NM_198212	CAV2	1155
chr7	116500488	116501022	18	NM_001206747	CAV2	1155
chr7	116500488	116501022	18	NM_001233	CAV2	1155
chr7	116500488	116501022	18	NM_001206748	CAV2	712
chr7	143318665	143319053	18	NM_000083	CLCN1	2734
chr7	143318665	143319053	18	NR_046453	CLCN1	2734
chr7	16421318	16422384	18	NM_001101426	ISPD	529
chr7	16421318	16422384	18	NM_001101417	ISPD	529
chr7	2471235	2471768	18	NM_001291784	GRIFIN	-4882
chr7	75527805	75528394	18	NR_028059	PMS2P3	-24
chr7	80134389	80134781	18	NM_002069	GNAI1	-238
chr7	80134389	80134781	18	NM_001256414	GNAI1	-1169
chr8	143836295	143836698	18	NR_106904	MIR6845	-1320
chr8	143836295	143836698	18	NM_178564	NRBP2	-4478
chr8	22140609	22141332	18	NM_025232	REEP4	-965
chr8	42265649	42266415	18	NR_125823	LOC101929897	-4929
chr9	106860148	106860649	18	NM_021224	ZNF462	-2698
chr9	133133298	133134217	18	NM_001271775	RALGDS	4356
chr9	133133298	133134217	18	NM_001271774	RALGDS	2600
chr9	134323790	134324613	18	NM_002957	RXRA	-2261
chr9	137273961	137274384	18	NM_017723	TOR4A	-3655
chr9	19404131	19404769	18	NM_001010887	ACER2	-4476
chr9	470156	470554	18	NM_001256876	KANK1	62
chr9	5629471	5629986	18	NM_001135920	RIC1	610
chr9	5629471	5629986	18	NM_020829	RIC1	610
chr9	5629471	5629986	18	NM_001206557	RIC1	610
chrX	130111112	130111717	18	NM_001127197	ELF4	701
chrX	130111112	130111717	18	NM_001421	ELF4	914
chrX	150694230	150694892	18	NM_003828	MTMR1	1166
chr1	109209960	109210705	17	NM_006513	SARS	-3560
chr1	109209960	109210705	17	NR_034072	SARS	-3560
chr1	153567509	153568045	17	NM_005978	S100A2	1947
chr1	154196946	154197421	17	NR_030600	MIR190B	3440
chr1	155125201	155125850	17	NM_182685	EFNA1	-2347
chr1	155125201	155125850	17	NM_004428	EFNA1	-2347
chr1	181032990	181033683	17	NM_001531	MR1	-88
chr1	181032990	181033683	17	NM_001195000	MR1	-88
chr1	181032990	181033683	17	NM_001195035	MR1	-88
chr1	181032990	181033683	17	NM_001194999	MR1	-88
chr1	182604365	182604922	17	NM_002928	RGS16	230
chr1	203625529	203625959	17	NM_001001396	ATP2B4	-1042
chr1	203625529	203625959	17	NM_001684	ATP2B4	-1042
chr1	209430871	209431611	17	NR_029622	MIR205	-891
chr1	209430871	209431611	17	NM_001104548	MIR205HG	2419
chr1	225922141	225922922	17	NM_013328	PYCR2	-1809
chr1	225922141	225922922	17	NM_001271681	PYCR2	-1809
chr1	225922141	225922922	17	NR_106799	MIR6741	389
chr1	227946257	227946806	17	NM_003395	WNT9A	-1444
chr1	227946257	227946806	17	NR_049806	MIR5008	4848
chr1	28884647	28885254	17	NM_203343	EPB41	-2140
chr1	28884647	28885254	17	NM_004437	EPB41	-2140
chr1	28884647	28885254	17	NM_001166005	EPB41	-2140
chr1	28884647	28885254	17	NM_001166007	EPB41	-2140
chr1	28884647	28885254	17	NM_203342	EPB41	-2140
chr1	32179734	32180324	17	NM_175852	TXLNA	286
chr1	40315234	40315600	17	NM_001852	COL9A2	-1850
chr1	6258602	6259050	17	NM_207370	GPR153	-2149
chr10	100998337	100999035	17	NM_032429	LZTS2	1580
chr10	102113057	102113539	17	NM_003893	LDB1	-1668
chr10	42640814	42641233	17	NM_001305036	ZNF33B	2186
chr10	42640814	42641233	17	NR_130950	ZNF33B	2186
chr10	42640814	42641233	17	NR_130948	ZNF33B	2186
chr10	42640814	42641233	17	NM_001305035	ZNF33B	2186
chr10	42640814	42641233	17	NM_001305033	ZNF33B	2186
chr10	42640814	42641233	17	NM_001305039	ZNF33B	2186
chr10	42640814	42641233	17	NM_001305040	ZNF33B	2186
chr10	42640814	42641233	17	NR_130951	ZNF33B	2186
chr10	42640814	42641233	17	NM_001305037	ZNF33B	2186
chr10	42640814	42641233	17	NR_130949	ZNF33B	2186
chr10	42640814	42641233	17	NM_001305038	ZNF33B	2186
chr10	42640814	42641233	17	NM_006955	ZNF33B	2186
chr10	61902642	61903487	17	NM_032199	ARID5B	1811
chr10	99656468	99656976	17	NM_020354	ENTPD7	-2783
chr11	110296802	110297229	17	NM_001260495	RDX	303
chr11	110296802	110297229	17	NM_001260494	RDX	303
chr11	110296802	110297229	17	NM_001260493	RDX	303
chr11	110296802	110297229	17	NM_001260492	RDX	303
chr11	110296802	110297229	17	NM_002906	RDX	303
chr11	110296802	110297229	17	NM_001260496	RDX	303
chr11	111378448	111378821	17	NM_006235	POU2AF1	-798
chr11	118153157	118153524	17	NM_174934	SCN4B	425
chr11	118153157	118153524	17	NM_001142348	SCN4B	425
chr11	118910312	118910637	17	NR_039713	MIR4492	-233
chr11	118910312	118910637	17	NM_182557	BCL9L	-430
chr11	35622115	35622634	17	NM_014344	FJX1	4188
chr11	46344907	46345432	17	NM_003646	DGKZ	-2236
chr11	46344907	46345432	17	NM_001199268	DGKZ	-2236
chr11	46344907	46345432	17	NM_201533	DGKZ	-97
chr11	46344907	46345432	17	NM_001199266	DGKZ	-2236
chr11	46344907	46345432	17	NM_001199267	DGKZ	-2236
chr11	58577704	58578292	17	NM_004811	LPXN	2081
chr11	58577704	58578292	17	NR_024091	ZFP91-CNTF	-1115
chr11	58577704	58578292	17	NM_053023	ZFP91	-1115
chr11	58577704	58578292	17	NM_001197051	ZFP91	-1115
chr11	58577704	58578292	17	NM_001143995	LPXN	-168
chr11	62547928	62548308	17	NM_001620	AHNAK	1258
chr11	62547928	62548308	17	NM_024060	AHNAK	1258
chr11	64881522	64881881	17	NM_006795	EHD1	2933
chr11	64881522	64881881	17	NM_001282445	EHD1	1988
chr11	64881522	64881881	17	NM_001282444	EHD1	1988
chr11	65182868	65183760	17	NM_001198868	CAPN1	2100
chr11	65182868	65183760	17	NM_005186	CAPN1	1482
chr11	65182868	65183760	17	NM_001198869	CAPN1	1636
chr11	65182868	65183760	17	NR_040008	CAPN1	1482
chr11	65899037	65899489	17	NR_125339	FOSL1	-1263
chr11	65899037	65899489	17	NM_001300844	FOSL1	-1263
chr11	65899037	65899489	17	NM_005438	FOSL1	-1263
chr11	65899037	65899489	17	NM_001300857	FOSL1	-1263
chr11	65899037	65899489	17	NM_001300855	FOSL1	-1263
chr11	65899037	65899489	17	NM_001300856	FOSL1	-1263
chr11	66619050	66619586	17	NM_001198846	RBM14-RBM4	2737
chr11	66619050	66619586	17	NM_006328	RBM14	2737
chr11	66619050	66619586	17	NM_001198836	RBM14	2737
chr11	66619050	66619586	17	NM_001198845	RBM14-RBM4	2737
chr11	66619050	66619586	17	NM_001198837	RBM14	2737
chr11	67312692	67313154	17	NR_024469	LOC100130987	-4915
chr11	692816	693158	17	NM_174940	TMEM80	-2603
chr11	692816	693158	17	NM_001293634	DEAF1	-2767
chr11	692816	693158	17	NM_001276253	TMEM80	-2603
chr11	692816	693158	17	NM_001042463	TMEM80	-2603
chr11	692816	693158	17	NM_001276274	TMEM80	-2603
chr11	692816	693158	17	NM_021008	DEAF1	-2767
chr11	75563787	75564290	17	NM_001235	SERPINH1	1983
chr11	75563787	75564290	17	NM_001207014	SERPINH1	1983
chr12	107320796	107321517	17	NM_001018072	BTBD11	2737
chr12	120445994	120446801	17	NR_033684	GATC	-40
chr12	120445994	120446801	17	NM_176818	GATC	-40
chr12	120445994	120446801	17	NM_016399	TRIAP1	-15
chr12	122721048	122721502	17	NM_006018	HCAR3	4383
chr12	13099781	13100204	17	NM_001206842	GSG1	-3704
chr12	13099781	13100204	17	NM_153823	GSG1	4186
chr12	13099781	13100204	17	NM_001080555	GSG1	-3704
chr12	13099781	13100204	17	NM_001206845	GSG1	4186
chr12	13099781	13100204	17	NM_001206843	GSG1	4186
chr12	13099781	13100204	17	NM_001080554	GSG1	-3704
chr12	13099781	13100204	17	NM_031289	GSG1	4186
chr12	22624941	22625425	17	NM_018638	ETNK1	42
chr12	22624941	22625425	17	NM_001039481	ETNK1	42
chr12	25054116	25054768	17	NM_006152	LRMP	2196
chr12	25054116	25054768	17	NM_001204127	LRMP	2196
chr12	25054116	25054768	17	NM_001204126	LRMP	2196
chr12	32901461	32901832	17	NM_001005242	PKP2	4800
chr12	32901461	32901832	17	NM_004572	PKP2	4800
chr12	50220291	50220714	17	NM_001113547	LIMA1	-2203
chr12	52906252	52906756	17	NM_002273	KRT8	1420
chr12	53223988	53224307	17	NM_001243732	RARG	3734
chr12	53223988	53224307	17	NM_001042728	RARG	3734
chr12	53381985	53382698	17	NM_138473	SP1	2147
chr12	53381985	53382698	17	NM_003109	SP1	1698
chr12	53381985	53382698	17	NM_001251825	SP1	2147
chr12	6312772	6313282	17	NM_018173	PLEKHG6	2592
chr12	6312772	6313282	17	NM_001144857	PLEKHG6	377
chr12	6312772	6313282	17	NM_001144856	PLEKHG6	2095
chr12	6507413	6508021	17	NR_004387	SCARNA10	-2504
chr12	96193684	96194202	17	NM_005230	ELK3	-438
chr12	98644120	98645175	17	NM_001160	APAF1	-652
chr12	98644120	98645175	17	NM_201613	IKBIP	-404
chr12	98644120	98645175	17	NM_201612	IKBIP	-404
chr12	98644120	98645175	17	NM_153687	IKBIP	-404
chr12	98644120	98645175	17	NM_181869	APAF1	-652
chr12	98644120	98645175	17	NM_013229	APAF1	-652
chr12	98644120	98645175	17	NM_181868	APAF1	-652
chr12	98644120	98645175	17	NM_181861	APAF1	-652
chr13	41137169	41137752	17	NM_152903	KBTBD6	4660
chr13	41137169	41137752	17	NR_120423	LOC101929140	4533
chr13	41260011	41260678	17	NM_004294	MTRF1	-3233
chr13	46554143	46554807	17	NM_001164213	LRCH1	1315
chr13	46554143	46554807	17	NM_015116	LRCH1	1315
chr13	46554143	46554807	17	NM_001164211	LRCH1	1315
chr14	100320237	100320872	17	NM_207117	SLC25A47	-2787
chr14	105166856	105167547	17	NM_145159	JAG2	-1623
chr14	105166856	105167547	17	NM_002226	JAG2	-1623
chr14	23631639	23632434	17	NM_005794	DHRS2	-4327
chr14	23631639	23632434	17	NM_182908	DHRS2	-4327
chr14	24309859	24310248	17	NM_014430	CIDEB	-1317
chr14	24309859	24310248	17	NM_019839	LTB4R2	-97
chr14	24309859	24310248	17	NM_001143919	LTB4R	-1445
chr14	24309859	24310248	17	NM_001164692	LTB4R2	-97
chr14	24309859	24310248	17	NM_181657	LTB4R	-3053
chr14	35826513	35827099	17	NM_032352	BRMS1L	416
chr14	63853847	63854393	17	NM_182914	SYNE2	1156
chr14	63853847	63854393	17	NM_015180	SYNE2	1156
chr14	75002447	75002904	17	NM_014239	EIF2B2	-233
chr15	50355025	50355703	17	NM_181427	GABPB1	-44
chr15	50355025	50355703	17	NM_002041	GABPB1	-44
chr15	50355025	50355703	17	NR_024490	GABPB1-AS1	1191
chr15	50355025	50355703	17	NR_039862	MIR4712	-4964
chr15	50355025	50355703	17	NR_026891	FLJ10038	485
chr15	50355025	50355703	17	NM_016654	GABPB1	-44
chr15	50355025	50355703	17	NM_016655	GABPB1	-44
chr15	50355025	50355703	17	NM_005254	GABPB1	-44
chr15	55408034	55408572	17	NM_020739	CCPG1	-207
chr15	55408034	55408572	17	NM_004748	CCPG1	-73
chr15	55408034	55408572	17	NM_001204451	CCPG1	-207
chr15	55408034	55408572	17	NM_001204450	CCPG1	-207
chr15	55408034	55408572	17	NM_001198784	C15orf65	-221
chr15	56244520	56244848	17	NM_022841	RFX7	1399
chr15	56369148	56369701	17	NM_198524	TEX9	4001
chr15	56369148	56369701	17	NM_001286449	TEX9	4001
chr15	82742046	82742755	17	NR_036446	ACTG1P17	2620
chr15	88620995	88621795	17	NM_022767	AEN	100
chr15	91021836	91022501	17	NM_018668	VPS33B	-453
chr15	91021836	91022501	17	NR_110104	LOC101926911	-453
chr15	91021836	91022501	17	NM_001289149	VPS33B	-453
chr15	91021836	91022501	17	NM_001289148	VPS33B	-453
chr16	15644197	15644661	17	NM_001143979	NDE1	1163
chr16	15644197	15644661	17	NM_014647	KIAA0430	1263
chr16	15644197	15644661	17	NR_030159	MIR484	1136
chr16	15644197	15644661	17	NM_001184998	KIAA0430	1263
chr16	15644197	15644661	17	NM_001184999	KIAA0430	1263
chr16	27317194	27317721	17	NM_000418	IL4R	3549
chr16	27317194	27317721	17	NM_001257407	IL4R	3549
chr16	27317194	27317721	17	NM_001257997	IL4R	3549
chr16	27317194	27317721	17	NM_001257406	IL4R	3549
chr16	354100	354775	17	NM_003502	AXIN1	1761
chr16	354100	354775	17	NM_181050	AXIN1	1761
chr16	56608208	56608727	17	NM_005953	MT2A	-98
chr16	57619523	57620587	17	NM_001145770	GPR56	58
chr16	57619523	57620587	17	NM_001290143	GPR56	363
chr16	57619523	57620587	17	NM_005682	GPR56	58
chr16	57619523	57620587	17	NM_001290142	GPR56	363
chr16	8716615	8716957	17	NM_000663	ABAT	3818
chr16	8716615	8716957	17	NM_001127448	ABAT	-3929
chr16	87777860	87778371	17	NR_120309	LOC102724467	-1033
chr17	16189767	16190136	17	NM_001190440	NCOR1	-4688
chr17	16189767	16190136	17	NM_001190438	NCOR1	-4688
chr17	19719177	19719701	17	NM_001256663	SLC47A2	2709
chr17	19719177	19719701	17	NM_001099646	SLC47A2	2709
chr17	19719177	19719701	17	NM_152908	SLC47A2	2709
chr17	22521250	22521560	17	NM_001190452	MTRNR2L1	-1705
chr17	3666314	3667307	17	NM_001014764	EMC6	-1912
chr17	3666314	3667307	17	NM_014604	TAX1BP3	-1869
chr17	3666314	3667307	17	NM_001204698	TAX1BP3	-1869
chr17	3666314	3667307	17	NM_031298	EMC6	-1912
chr17	41301312	41302207	17	NM_001257309	KRTAP29-1	-1092
chr17	49507924	49508763	17	NR_106751	MIR6165	-2473
chr17	50148763	50149107	17	NM_032595	PPP1R9B	-1582
chr17	59139800	59140298	17	NR_030411	MIR454	2177
chr17	60082150	60082826	17	NM_022070	HEATR6	3557
chr17	60600056	60600686	17	NM_003620	PPM1D	189
chr17	6655082	6655530	17	NM_016060	MED31	3672
chr17	6655082	6655530	17	NR_039874	MIR4520-2	-142
chr17	6655082	6655530	17	NR_039745	MIR4520-1	-203
chr17	6655082	6655530	17	NM_001105520	C17orf100	3568
chr17	6655082	6655530	17	NR_045985	ALOX15P1	-2412
chr17	7444094	7444602	17	NM_001303460	FGF11	3607
chr17	7444094	7444602	17	NM_000747	CHRNB1	-738
chr17	75723188	75723670	17	NM_001005619	ITGB4	-1266
chr17	75723188	75723670	17	NM_000213	ITGB4	1994
chr17	75723188	75723670	17	NM_001005731	ITGB4	1994
chr17	75844835	75845547	17	NM_199242	UNC13D	474
chr18	23453354	23454088	17	NM_003831	RIOK3	899
chr18	26550177	26550828	17	NM_001136205	KCTD1	1067
chr18	26550177	26550828	17	NM_001258221	KCTD1	688
chr18	26550177	26550828	17	NM_001142730	KCTD1	1966
chr18	59899517	59900152	17	NM_021127	PMAIP1	-125
chr19	10520801	10521283	17	NM_030760	S1PR5	3592
chr19	10520801	10521283	17	NM_001166215	S1PR5	3050
chr19	1252569	1253033	17	NM_177401	MIDN	4249
chr19	18157635	18158011	17	NR_073517	PIK3R2	4646
chr19	18157635	18158011	17	NM_005027	PIK3R2	4646
chr19	3520591	3521321	17	NM_001136197	FZR1	-1999
chr19	3520591	3521321	17	NM_001136198	FZR1	-1999
chr19	45402406	45402744	17	NM_001142502	PPP1R13L	-3774
chr19	45402406	45402744	17	NM_006663	PPP1R13L	-2479
chr19	45402406	45402744	17	NM_001297590	CD3EAP	-3633
chr19	45402406	45402744	17	NM_012099	CD3EAP	-3633
chr19	48752398	48753121	17	NM_000148	FUT1	-2631
chr19	48752398	48753121	17	NM_019113	FGF21	-3327
chr19	50896512	50896996	17	NR_002948	KLKP1	356
chr19	55446121	55446561	17	NM_001145176	SHISA7	3478
chr19	5790479	5791012	17	NM_001161619	DUS3L	-493
chr19	5790479	5791012	17	NM_020175	DUS3L	-493
chr2	100562486	100562979	17	NM_024065	PDCL3	-223
chr2	112645094	112645713	17	NM_005415	SLC20A1	-453
chr2	112645094	112645713	17	NR_033871	FLJ42351	1223
chr2	113072441	113072994	17	NM_173161	IL1F10	4748
chr2	113072441	113072994	17	NM_032556	IL1F10	400
chr2	127859671	127860113	17	NM_004805	POLR2D	1737
chr2	159735672	159736145	17	NM_001282807	MARCH7	2018
chr2	164839914	164840519	17	NR_110574	LOC101929633	-532
chr2	164839914	164840519	17	NM_001278458	COBLL1	-1952
chr2	164839914	164840519	17	NM_001278461	COBLL1	-1202
chr2	164839914	164840519	17	NM_001278460	COBLL1	-1952
chr2	164839914	164840519	17	NM_014900	COBLL1	-1202
chr2	172857978	172858327	17	NM_001282899	RAPGEF4	-1885
chr2	172857978	172858327	17	NM_001282900	RAPGEF4	-1885
chr2	173355922	173356523	17	NM_031942	CDCA7	1390
chr2	173355922	173356523	17	NM_145810	CDCA7	1390
chr2	176106521	176107082	17	NM_021192	HOXD11	-554
chr2	201642623	201643002	17	NM_001044385	TMEM237	-717
chr2	201642623	201643002	17	NM_152388	TMEM237	-132
chr2	209422250	209422607	17	NM_001039538	MAP2	-1618
chr2	219217873	219218625	17	NM_005689	ABCB6	-741
chr2	230219807	230220354	17	NM_080424	SP110	-32
chr2	230219807	230220354	17	NM_004510	SP110	-32
chr2	230219807	230220354	17	NM_004509	SP110	-32
chr2	24083993	24084755	17	NM_147184	TP53I3	-841
chr2	24083993	24084755	17	NM_004881	TP53I3	-841
chr2	24083993	24084755	17	NM_001206802	TP53I3	43
chr2	28927782	28928307	17	NR_002741	SNORD53	978
chr2	69518777	69519202	17	NR_003705	SNORA36C	-1182
chr2	73983592	73984053	17	NR_104029	DGUOK-AS1	2383
chr2	73983592	73984053	17	NR_104030	DGUOK-AS1	2383
chr2	73983592	73984053	17	NM_001287491	TET3	-2581
chr2	96534808	96535188	17	NM_212481	ARID5A	-1728
chr20	298341	298886	17	NM_033089	ZCCHC3	1051
chr20	35171553	35172102	17	NM_006404	PROCR	-109
chr20	41133707	41134352	17	NM_002660	PLCG1	-3491
chr20	41133707	41134352	17	NM_182811	PLCG1	-3491
chr20	41133707	41134352	17	NR_109889	PLCG1-AS1	-3971
chr20	44956369	44956814	17	NM_006809	TOMM34	-3882
chr20	51020019	51020558	17	NM_002237	KCNG1	-2850
chr20	5119530	5120454	17	NR_028370	PCNA-AS1	407
chr20	5119530	5120454	17	NM_182649	PCNA	-9
chr20	63740900	63741561	17	NM_020062	SLC2A4RG	1373
chr20	63740900	63741561	17	NM_017806	LIME1	4605
chr21	41678028	41678647	17	NR_024367	LINC00111	-964
chr21	45409755	45410420	17	NR_052004	COL18A1-AS2	22
chr21	45409755	45410420	17	NM_130445	COL18A1	4951
chr21	45853939	45854369	17	NM_020528	PCBP3	4194
chr21	45853939	45854369	17	NM_001130141	PCBP3	4194
chr22	26592257	26592677	17	NM_003595	TPST2	2342
chr22	26673326	26673927	17	NR_110543	MIATNB	784
chr22	37431941	37432507	17	NM_052906	ELFN2	4754
chr22	37431941	37432507	17	NR_110512	ELFN2	4754
chr22	37518062	37518625	17	NM_014550	CARD10	-860
chr22	38318300	38318727	17	NM_152221	CSNK1E	1105
chr22	38318300	38318727	17	NM_001894	CSNK1E	429
chr22	43925956	43926546	17	NM_025225	PNPLA3	2513
chr22	50083216	50083680	17	NM_139202	MLC1	-1904
chr22	50083216	50083680	17	NM_015166	MLC1	-2481
chr22	50305847	50306179	17	NM_012401	PLXNB2	-1559
chr3	122081361	122082089	17	NM_006889	CD86	3877
chr3	122081361	122082089	17	NM_176892	CD86	3877
chr3	122324839	122325277	17	NM_005213	CSTA	-105
chr3	13547941	13548340	17	NM_001998	FBLN2	-984
chr3	13547941	13548340	17	NM_001004019	FBLN2	-984
chr3	142925002	142925570	17	NR_038455	LOC100507389	-1388
chr3	189824855	189825434	17	NR_030642	MIR944	-4777
chr3	190325894	190326598	17	NM_021101	CLDN1	3800
chr3	46692471	46692977	17	NM_001190707	ALS2CL	-932
chr3	46692471	46692977	17	NM_147129	ALS2CL	-980
chr3	46692471	46692977	17	NR_033815	ALS2CL	-980
chr3	52406252	52406759	17	NM_004656	BAP1	-3600
chr3	52406252	52406759	17	NM_016483	PHF7	-4055
chr3	52536176	52536545	17	NM_022908	NT5DC2	1283
chr3	52536176	52536545	17	NM_001124767	SMIM4	-244
chr3	52536176	52536545	17	NM_001134231	NT5DC2	2583
chr3	71069726	71070112	17	NM_001244813	FOXP1	4996
chr3	81761193	81761951	17	NM_000158	GBE1	-227
chr4	105896187	105896569	17	NM_001184691	NPNT	939
chr4	105896187	105896569	17	NM_001184693	NPNT	939
chr4	105896187	105896569	17	NM_001184690	NPNT	939
chr4	105896187	105896569	17	NM_001033047	NPNT	939
chr4	105896187	105896569	17	NM_001184692	NPNT	939
chr4	184814997	184815445	17	NM_001286708	ACSL1	2962
chr4	70701236	70701698	17	NM_001130709	RUFY3	-3469
chr5	123422806	123423598	17	NM_153223	CEP120	-390
chr5	123422806	123423598	17	NM_001166226	CEP120	-390
chr5	176541442	176541795	17	NM_014901	RNF44	4198
chr5	176541442	176541795	17	NM_001171976	CDHR2	-892
chr5	180803748	180804293	17	NM_001114619	MGAT1	118
chr5	180803748	180804293	17	NM_001114620	MGAT1	118
chr5	180803748	180804293	17	NM_002406	MGAT1	972
chr5	80406855	80407311	17	NM_001284236	ZFYVE16	-929
chr5	80406855	80407311	17	NM_014733	ZFYVE16	-929
chr5	80406855	80407311	17	NM_001105251	ZFYVE16	-929
chr5	80406855	80407311	17	NM_001284237	ZFYVE16	-929
chr5	84382093	84382713	17	NM_005711	EDIL3	-2464
chr5	84382093	84382713	17	NM_001278642	EDIL3	-2464
chr5	96808053	96808546	17	NM_016442	ERAP1	110
chr5	96808053	96808546	17	NM_001040458	ERAP1	110
chr6	10431290	10431839	17	NR_027793	LINC00518	-3258
chr6	109008748	109009724	17	NM_001199933	SESN1	-319
chr6	109008748	109009724	17	NM_001199934	SESN1	248
chr6	18386973	18387493	17	NM_182757	RNF144B	-116
chr6	30744512	30744923	17	NM_005803	FLOT1	2041
chr6	30744512	30744923	17	NM_003897	IER3	167
chr6	30882559	30882947	17	NM_001954	DDR1	-1330
chr6	30882559	30882947	17	NM_001297653	DDR1	-1784
chr6	30882559	30882947	17	NM_013993	DDR1	-1796
chr6	30882559	30882947	17	NM_001202523	DDR1	-2226
chr6	30882559	30882947	17	NM_001297654	DDR1	-1784
chr6	30882559	30882947	17	NM_001297652	DDR1	141
chr6	42193487	42193913	17	NM_002098	GUCA1B	-1256
chr6	44128518	44129044	17	NM_018426	TMEM63B	1143
chr6	44128518	44129044	17	NM_032111	MRPL14	1327
chr6	53627802	53628223	17	NR_125841	LINC01564	-367
chr6	70397400	70397836	17	NR_125857	LOC101928353	3417
chr6	85679197	85679604	17	NR_003044	SNORD50B	1741
chr6	85679197	85679604	17	NR_002743	SNORD50A	2032
chr6	85679197	85679604	17	NR_003038	SNHG5	667
chr7	100163128	100163515	17	NM_018275	C7orf43	4600
chr7	100163128	100163515	17	NM_001303470	C7orf43	4600
chr7	108132530	108132943	17	NM_007356	LAMB4	2380
chr7	134526521	134526913	17	NM_020299	AKR1B10	-874
chr7	149716576	149716974	17	NM_032534	KRBA1	1765
chr7	149716576	149716974	17	NM_001290187	KRBA1	1765
chr7	150367832	150368274	17	NM_014374	REPIN1	-3115
chr7	150367832	150368274	17	NM_001099695	REPIN1	-736
chr7	150367832	150368274	17	NM_013400	REPIN1	-736
chr7	150367832	150368274	17	NM_001099696	REPIN1	-736
chr7	1559563	1560516	17	NM_001097620	TMEM184A	3609
chr7	22356977	22358056	17	NM_012294	RAPGEF5	602
chr7	2523064	2524466	17	NM_001040167	LFNG	3921
chr7	2523064	2524466	17	NM_001040168	LFNG	3921
chr7	2523064	2524466	17	NR_039791	MIR4648	-3308
chr7	75486098	75486471	17	NM_001099415	POM121C	-4
chr7	76423209	76423898	17	NM_001110354	ZP3	-1401
chr7	944939	945840	17	NM_001284309	ADAP1	-427
chr7	99561203	99561919	17	NM_001085367	ZNF655	2737
chr7	99561203	99561919	17	NM_001085366	ZNF655	3140
chr7	99561203	99561919	17	NM_001085368	ZNF655	2737
chr7	99561203	99561919	17	NM_001009960	ZNF655	2737
chr7	99561203	99561919	17	NM_024061	ZNF655	3140
chr7	99561203	99561919	17	NM_001009958	ZNF655	2737
chr7	99561203	99561919	17	NM_138494	ZNF655	3140
chr7	99561203	99561919	17	NM_001083956	ZNF655	3140
chr7	99737452	99738098	17	NM_000765	CYP3A7	2575
chr7	99737452	99738098	17	NM_001256497	CYP3A7-CYP3A51P	2575
chr8	10654477	10655018	17	NM_178857	RP1L1	-360
chr8	27482960	27483610	17	NM_000742	CHRNA2	3989
chr8	27482960	27483610	17	NM_001282455	CHRNA2	3989
chr9	113872367	113873067	17	NM_133374	ZNF618	-3564
chr9	122551382	122551810	17	NM_001004457	OR1N2	-1573
chr9	129751798	129752312	17	NM_004878	PTGES	-1010
chr9	131432039	131432596	17	NM_013318	PRRC2B	2228
chr9	134329889	134330436	17	NM_002957	RXRA	3700
chr9	136198632	136199070	17	NM_014564	LHX3	-4307
chr9	33621094	33621532	17	NR_003573	ANXA2P2	-2911
chr9	34662908	34663616	17	NM_006664	CCL27	570
chr9	63817579	63818428	17	NR_039688	MIR4477A	-1651
chr9	63817579	63818428	17	NR_039689	MIR4477B	-1570
chrX	153441938	153442344	17	NM_080701	TREX2	-4346
chr1	115839172	115839635	16	NM_001111061	NHLH2	-1309
chr1	115839172	115839635	16	NM_005599	NHLH2	-1723
chr1	116556656	116556973	16	NR_039621	MIR548AC	-3297
chr1	152718250	152718748	16	NM_001024679	C1orf68	-1022
chr1	156123683	156124211	16	NM_001282624	LMNA	-2169
chr1	156123683	156124211	16	NM_001257374	LMNA	-2169
chr1	159925551	159926171	16	NM_001277224	TAGLN2	2144
chr1	159925551	159926171	16	NM_003564	TAGLN2	319
chr1	159925551	159926171	16	NM_001277223	TAGLN2	1310
chr1	16155925	16156271	16	NM_004431	EPHA2	11
chr1	17245253	17245603	16	NM_016233	PADI3	-3669
chr1	17443450	17443930	16	NM_018715	RCC2	3936
chr1	17582041	17582428	16	NM_001011722	ARHGEF10L	1682
chr1	205749579	205750197	16	NM_022731	NUCKS1	-356
chr1	223707867	223708456	16	NM_001748	CAPN2	-4255
chr1	229268213	229269038	16	NM_004578	RAB4A	-2436
chr1	229268213	229269038	16	NR_073545	RAB4A	-2436
chr1	229268213	229269038	16	NM_001271998	RAB4A	-2436
chr1	24319529	24319872	16	NM_198173	GRHL3	379
chr1	24319529	24319872	16	NM_001195010	GRHL3	135
chr1	24319529	24319872	16	NM_021180	GRHL3	-3339
chr1	24319529	24319872	16	NM_198174	GRHL3	379
chr1	25871275	25872009	16	NM_178422	PAQR7	389
chr1	26864924	26865537	16	NM_006142	SFN	2089
chr1	29239246	29239713	16	NM_001195001	PTPRU	2964
chr1	29239246	29239713	16	NM_005704	PTPRU	2964
chr1	29239246	29239713	16	NM_133177	PTPRU	2964
chr1	29239246	29239713	16	NM_133178	PTPRU	2964
chr1	42743290	42743691	16	NM_001123395	CLDN19	3236
chr1	42743290	42743691	16	NM_148960	CLDN19	3236
chr1	42743290	42743691	16	NM_001185117	CLDN19	3236
chr1	43711942	43712348	16	NM_001270464	ST3GAL3	4613
chr1	43711942	43712348	16	NR_073018	ST3GAL3	4613
chr1	43711942	43712348	16	NM_001270459	ST3GAL3	4613
chr1	43711942	43712348	16	NM_174969	ST3GAL3	4613
chr1	43711942	43712348	16	NR_073021	ST3GAL3	4613
chr1	43711942	43712348	16	NM_001270461	ST3GAL3	4613
chr1	43711942	43712348	16	NM_174967	ST3GAL3	4613
chr1	43711942	43712348	16	NR_073016	ST3GAL3	4613
chr1	43711942	43712348	16	NR_073017	ST3GAL3	4613
chr1	43711942	43712348	16	NM_001270460	ST3GAL3	4613
chr1	43711942	43712348	16	NM_001270462	ST3GAL3	4613
chr1	43711942	43712348	16	NM_001270465	ST3GAL3	4613
chr1	43711942	43712348	16	NR_073019	ST3GAL3	4613
chr1	43711942	43712348	16	NM_001270466	ST3GAL3	4613
chr1	43711942	43712348	16	NM_001270463	ST3GAL3	4613
chr1	43711942	43712348	16	NM_174970	ST3GAL3	4613
chr1	43711942	43712348	16	NR_073020	ST3GAL3	4613
chr1	43711942	43712348	16	NR_073023	ST3GAL3	4613
chr1	43711942	43712348	16	NM_174963	ST3GAL3	4613
chr1	43711942	43712348	16	NM_174964	ST3GAL3	4613
chr1	43711942	43712348	16	NM_174966	ST3GAL3	4613
chr1	43711942	43712348	16	NR_033827	KDM4A-AS1	4804
chr1	43711942	43712348	16	NM_174968	ST3GAL3	4613
chr1	43711942	43712348	16	NM_006279	ST3GAL3	4613
chr1	43711942	43712348	16	NM_174965	ST3GAL3	4613
chr1	43711942	43712348	16	NM_174971	ST3GAL3	4613
chr1	52368921	52369429	16	NM_032449	CC2D1B	2970
chr1	63317337	63317755	16	NR_121635	FOXD3-AS1	-4912
chr1	63317337	63317755	16	NR_038252	LINC00466	316
chr1	63317337	63317755	16	NR_121634	FOXD3-AS1	-4912
chr1	6414409	6415439	16	NM_019089	HES2	-4995
chr1	86423848	86424395	16	NM_006536	CLCA2	36
chr10	100285941	100286650	16	NM_173809	BLOC1S2	-417
chr10	100285941	100286650	16	NM_001282436	BLOC1S2	-417
chr10	100285941	100286650	16	NM_001001342	BLOC1S2	-69
chr10	100285941	100286650	16	NM_001282438	BLOC1S2	-83
chr10	100285941	100286650	16	NM_001282437	BLOC1S2	-417
chr10	100285941	100286650	16	NM_001282439	BLOC1S2	-417
chr10	102642351	102643176	16	NM_030912	TRIM8	-1731
chr10	113551992	113552383	16	NM_004132	HABP2	-831
chr10	113551992	113552383	16	NM_001177660	HABP2	1357
chr10	127738447	127738964	16	NM_207426	FOXI2	1432
chr10	29635063	29635614	16	NM_021738	SVIL	366
chr10	47483939	47484267	16	NM_001040084	ANXA8	-55
chr10	47483939	47484267	16	NM_001271703	ANXA8	-55
chr10	47483939	47484267	16	NM_001271702	ANXA8	-55
chr10	50621884	50622308	16	NM_147156	SGMS1	-1881
chr10	50621884	50622308	16	NR_126411	SGMS1-AS1	-2854
chr10	58385130	58385714	16	NR_073073	TFAM	280
chr10	58385130	58385714	16	NM_003201	TFAM	280
chr10	58385130	58385714	16	NM_001270782	TFAM	280
chr10	75208161	75208641	16	NM_001184823	VDAC2	-1752
chr10	75208161	75208641	16	NM_001184783	VDAC2	-2140
chr10	75208161	75208641	16	NR_033675	VDAC2	-2140
chr10	75208161	75208641	16	NM_003375	VDAC2	-2140
chr10	97689972	97690538	16	NM_021732	AVPI1	2997
chr11	118264193	118264698	16	NM_144765	MPZL2	-91
chr11	118264193	118264698	16	NM_005797	MPZL2	-91
chr11	122655401	122656014	16	NM_032873	UBASH3B	18
chr11	27362999	27363554	16	NM_080654	CCDC34	28
chr11	27362999	27363554	16	NM_030771	CCDC34	28
chr11	32583506	32584000	16	NM_006360	EIF3M	-13
chr11	446816	447290	16	NM_030783	PTDSS2	-3226
chr11	46916715	46917086	16	NM_002334	LRP4	-1722
chr11	47214768	47215876	16	NM_001300734	DDB2	381
chr11	47214768	47215876	16	NM_000107	DDB2	381
chr11	61820052	61820660	16	NM_013402	FADS1	3299
chr11	61820052	61820660	16	NM_001281502	FADS2	3953
chr11	61820052	61820660	16	NM_001281501	FADS2	4154
chr11	67264830	67265357	16	NM_001619	ADRBK1	-1340
chr11	72083991	72084475	16	NM_001145310	LRTOMT	3903
chr11	72083991	72084475	16	NM_006185	NUMA1	3540
chr11	72083991	72084475	16	NM_001205138	LRTOMT	3903
chr11	72083991	72084475	16	NM_001271471	LRTOMT	3903
chr11	72083991	72084475	16	NM_001286561	NUMA1	3540
chr11	72083991	72084475	16	NM_001145307	LRTOMT	3903
chr11	72083991	72084475	16	NM_001145309	LRTOMT	3903
chr11	72083991	72084475	16	NM_145309	LRTOMT	3903
chr11	72083991	72084475	16	NR_104476	NUMA1	3759
chr11	72083991	72084475	16	NM_001145308	LRTOMT	3903
chr11	72083991	72084475	16	NR_026886	LRTOMT	3903
chr11	72721765	72722227	16	NM_001135190	ARAP1	-362
chr11	72721765	72722227	16	NM_015242	ARAP1	-362
chr11	7600229	7600662	16	NM_001256568	PPFIBP2	3260
chr11	86068963	86069402	16	NM_001206946	PICALM	85
chr11	86068963	86069402	16	NM_001008660	PICALM	85
chr11	86068963	86069402	16	NM_007166	PICALM	85
chr11	86068963	86069402	16	NM_001206947	PICALM	-699
chr11	88179893	88180366	16	NR_036124	MIR3166	3628
chr11	88179893	88180366	16	NM_022337	RAB38	4662
chr11	9758772	9759189	16	NR_033972	LOC440028	-553
chr11	9758772	9759189	16	NR_036485	SBF2-AS1	688
chr11	9759463	9760094	16	NR_033972	LOC440028	245
chr11	9759463	9760094	16	NR_036485	SBF2-AS1	1486
chr12	10176209	10176660	16	NM_002543	OLR1	4243
chr12	10176209	10176660	16	NM_001172632	OLR1	4243
chr12	10176209	10176660	16	NM_153022	TMEM52B	-2523
chr12	10176209	10176660	16	NM_001172633	OLR1	4243
chr12	15789711	15790266	16	NM_004447	EPS8	412
chr12	31732923	31733336	16	NR_103523	AMN1	3955
chr12	31732923	31733336	16	NM_001278412	AMN1	3955
chr12	31732923	31733336	16	NM_001113402	AMN1	3955
chr12	31732923	31733336	16	NR_103522	AMN1	3955
chr12	31732923	31733336	16	NM_001278411	AMN1	3955
chr12	52209279	52209666	16	NR_027358	LINC00592	-1457
chr12	52209279	52209666	16	NM_001242696	C12orf80	-1383
chr12	52521165	52521650	16	NM_000424	KRT5	948
chr12	57127640	57128047	16	NM_002332	LRP1	-655
chr12	8678603	8679048	16	NR_123740	RIMKLB	-2851
chr13	113298532	113298945	16	NM_005561	LAMP1	1585
chr13	51556773	51557214	16	NR_039852	MIR4703	4405
chr13	51584686	51585130	16	NM_052950	WDFY2	561
chr13	98576069	98576558	16	NM_001286649	STK24	-838
chr13	98576069	98576558	16	NM_001032296	STK24	-838
chr14	65047575	65048000	16	NR_039855	MIR4706	3100
chr14	91509133	91509717	16	NM_001284281	SMEK1	-1055
chr14	91509133	91509717	16	NM_001284280	SMEK1	-1055
chr14	92926390	92926793	16	NM_001301690	CHGA	3492
chr14	92926390	92926793	16	NM_001275	CHGA	3492
chr14	93959760	93960284	16	NM_016150	ASB2	2601
chr15	65796310	65796950	16	NM_005848	DENND4A	4337
chr15	65796310	65796950	16	NM_001144823	DENND4A	4337
chr15	78146895	78147487	16	NM_005530	IDH3A	-2185
chr15	88913606	88913997	16	NM_001114614	MFGE8	369
chr15	88913606	88913997	16	NM_005928	MFGE8	369
chr15	89243509	89244000	16	NM_018193	FANCI	-208
chr15	89243509	89244000	16	NM_001113378	FANCI	-208
chr15	99733477	99733927	16	NM_001284418	LYSMD4	317
chr15	99733477	99733927	16	NM_001284417	LYSMD4	258
chr15	99733477	99733927	16	NM_001284422	LYSMD4	258
chr15	99733477	99733927	16	NM_001284419	LYSMD4	258
chr15	99733477	99733927	16	NM_152449	LYSMD4	258
chr15	99733477	99733927	16	NM_001284420	LYSMD4	258
chr15	99733477	99733927	16	NM_001284421	LYSMD4	258
chr16	1701382	1701884	16	NM_001040439	MAPK8IP3	-4586
chr16	1701382	1701884	16	NM_015133	MAPK8IP3	-4586
chr16	1952530	1952924	16	NM_005061	RPL3L	-1951
chr16	53052448	53052959	16	NM_025134	CHD9	-2329
chr16	593502	593913	16	NM_021168	RAB40C	3535
chr16	593502	593913	16	NM_001172663	RAB40C	4351
chr16	593502	593913	16	NM_001172665	RAB40C	3631
chr16	593502	593913	16	NM_001172664	RAB40C	4039
chr16	593502	593913	16	NM_001172666	RAB40C	3631
chr16	66935201	66935613	16	NM_198061	CES2	964
chr16	66935201	66935613	16	NR_024525	FAM96B	984
chr16	66935201	66935613	16	NR_046109	FAM96B	984
chr16	66935201	66935613	16	NM_003869	CES2	964
chr16	66935201	66935613	16	NM_016062	FAM96B	984
chr16	66935201	66935613	16	NR_036684	CES2	937
chr16	67397874	67398245	16	NM_015964	TPPP3	4524
chr16	67397874	67398245	16	NM_016140	TPPP3	4524
chr16	85752021	85752472	16	NM_206967	C16orf74	1163
chr17	18377339	18377894	16	NM_001145127	EVPLL	-148
chr17	41348218	41348727	16	NM_004138	KRT33A	-2340
chr17	41519424	41520034	16	NR_106765	MIR6510	2512
chr17	41519424	41520034	16	NM_002275	KRT15	711
chr17	43444014	43444680	16	NR_031751	MIR2117	-458
chr17	43483680	43484082	16	NM_004941	DHX8	-35
chr17	43483680	43484082	16	NM_001302623	DHX8	-35
chr17	43759937	43760465	16	NM_025237	SOST	1413
chr17	50371333	50372082	16	NM_152463	EME1	-1512
chr17	50371333	50372082	16	NM_001166131	EME1	-1512
chr17	50371333	50372082	16	NM_016504	MRPL27	-1494
chr17	68510333	68510831	16	NM_212472	PRKAR1A	-1796
chr17	68510333	68510831	16	NM_212471	PRKAR1A	-1197
chr17	68510333	68510831	16	NM_001276290	PRKAR1A	-4811
chr17	68510333	68510831	16	NM_001276289	PRKAR1A	-1796
chr17	68510333	68510831	16	NM_002734	PRKAR1A	-1796
chr17	7280028	7280988	16	NM_001042	SLC2A4	-1226
chr17	73224655	73225416	16	NM_001289412	FAM104A	-2682
chr17	7476176	7476952	16	NM_001128833	ZBTB4	-3061
chr17	7476176	7476952	16	NM_001102614	SLC35G6	-4837
chr17	74921011	74921394	16	NM_173477	USH1G	-2061
chr17	74921011	74921394	16	NM_001282489	USH1G	-2061
chr17	74921011	74921394	16	NM_178160	OTOP2	-3072
chr17	75784874	75785704	16	NM_001080419	UNK	451
chr17	75784874	75785704	16	NR_039892	MIR4738	682
chr17	75784874	75785704	16	NR_038131	UNK	451
chr17	76071925	76072495	16	NM_014230	SRP68	-316
chr17	76071925	76072495	16	NR_048541	SRP68	-316
chr17	76071925	76072495	16	NM_001260502	SRP68	-316
chr17	76071925	76072495	16	NM_003857	GALR2	-2590
chr17	76484572	76485073	16	NM_001005498	RHBDF2	-3087
chr17	77471796	77472331	16	NM_001113495	SEPT9	-3179
chr18	10412916	10413338	16	NR_110775	LINC01254	-1243
chr18	46069437	46070177	16	NM_024430	PSTPIP2	-2477
chr19	15276592	15277056	16	NM_014299	BRD4	-3627
chr19	15276592	15277056	16	NM_058243	BRD4	-3627
chr19	17249988	17250372	16	NM_005234	NR2F6	4838
chr19	17450165	17450765	16	NM_001190844	TMEM221	1898
chr19	18438539	18439065	16	NM_001170938	ISYNA1	501
chr19	18438539	18439065	16	NM_016368	ISYNA1	501
chr19	18438539	18439065	16	NR_045574	ISYNA1	640
chr19	18438539	18439065	16	NM_001253389	ISYNA1	1493
chr19	18438539	18439065	16	NR_045573	ISYNA1	501
chr19	18939964	18940501	16	NM_004838	HOMER3	-1000
chr19	18939964	18940501	16	NM_001145722	HOMER3	-72
chr19	18939964	18940501	16	NM_001145721	HOMER3	-120
chr19	18939964	18940501	16	NR_027297	HOMER3	597
chr19	18939964	18940501	16	NM_001145724	HOMER3	1183
chr19	35122892	35123357	16	NR_106947	MIR6887	425
chr19	42129803	42130248	16	NR_038332	LOC100505622	-2603
chr19	42129803	42130248	16	NM_001207026	POU2F2	-2448
chr19	42129803	42130248	16	NM_001247994	POU2F2	-2448
chr19	42129803	42130248	16	NM_001207025	POU2F2	-2448
chr19	42129803	42130248	16	NR_036208	MIR4323	-3488
chr19	42129803	42130248	16	NM_002698	POU2F2	-2448
chr19	44553486	44554087	16	NR_027754	CEACAM22P	-3131
chr19	45250718	45251323	16	NM_031417	MARK4	-237
chr19	45250718	45251323	16	NM_001199867	MARK4	-237
chr19	45424252	45424717	16	NM_001166049	ERCC1	565
chr19	45424252	45424717	16	NM_001983	ERCC1	565
chr19	45424252	45424717	16	NM_202001	ERCC1	922
chr19	5789858	5790212	16	NM_001161619	DUS3L	-1203
chr19	5789858	5790212	16	NM_020175	DUS3L	-1203
chr2	10137138	10137981	16	NM_182626	C2orf48	-3822
chr2	130911823	130912331	16	NM_015320	ARHGEF4	-4573
chr2	14628960	14629335	16	NM_145175	FAM84A	-3538
chr2	168583753	168584217	16	NR_039933	MIR4774	1043
chr2	171433257	171433583	16	NR_028482	DCAF17	-830
chr2	171433257	171433583	16	NM_025000	DCAF17	-830
chr2	171433257	171433583	16	NM_024770	METTL8	-1382
chr2	171433257	171433583	16	NM_001164821	DCAF17	-830
chr2	27380673	27381177	16	NM_144631	ZNF513	181
chr2	27380673	27381177	16	NM_001201459	ZNF513	481
chr2	28895156	28895673	16	NM_015131	WDR43	772
chr2	72822802	72823132	16	NM_015189	EXOC6B	-3081
chr20	19884637	19885184	16	NM_018993	RIN2	-4655
chr20	19884637	19885184	16	NM_001242581	RIN2	-1610
chr20	25695581	25696397	16	NM_015655	ZNF337	-915
chr20	31610611	31611083	16	NR_036161	MIR3193	3662
chr20	32235835	32236537	16	NR_031726	MIR1825	-1608
chr20	45114413	45114931	16	NM_145652	WFDC5	-500
chr20	47317229	47317882	16	NR_024594	LOC100131496	-946
chr20	62366322	62366714	16	NM_005560	LAMA5	-794
chr20	63534000	63534462	16	NM_001256358	PTK6	-3139
chr20	63534000	63534462	16	NM_005975	PTK6	-3139
chr21	36320601	36321030	16	NM_015358	MORC3	627
chr21	38267801	38268389	16	NM_170737	KCNJ15	-4324
chr22	19129806	19130214	16	NM_053006	TSSK2	-797
chr22	24578640	24579158	16	NM_013430	GGT1	-4850
chr22	29717835	29718181	16	NM_182527	CABP7	-2346
chr22	39309427	39309908	16	NR_000028	SNORD83B	-4244
chr22	46007216	46007922	16	NR_027240	LOC730668	954
chr22	46627322	46627761	16	NM_015124	GRAMD4	781
chr3	159765742	159766218	16	NR_121669	IQCJ-SCHIP1-AS1	-2632
chr3	168095990	168096571	16	NM_014498	GOLIM4	651
chr3	179969497	179969974	16	NM_001256755	PEX5L	-4485
chr3	179969497	179969974	16	NM_001256756	PEX5L	-4485
chr3	179969497	179969974	16	NM_001256754	PEX5L	-4485
chr3	186614878	186615233	16	NM_001622	AHSG	1995
chr3	38453478	38453878	16	NM_001106	ACVR2B	-620
chr3	38453478	38453878	16	NR_028389	ACVR2B-AS1	-1142
chr3	43693516	43694049	16	NM_016006	ABHD5	2900
chr3	9248525	9248940	16	NM_001033117	SRGAP3	-953
chr3	9248525	9248940	16	NM_014850	SRGAP3	-953
chr4	152352383	152352958	16	NM_018315	FBXW7	-288
chr4	1789597	1789964	16	NM_022965	FGFR3	-3531
chr4	1789597	1789964	16	NM_001163213	FGFR3	-3531
chr4	1789597	1789964	16	NM_000142	FGFR3	-3531
chr4	25376677	25377120	16	NM_001286756	ANAPC4	-327
chr4	25376677	25377120	16	NM_013367	ANAPC4	-327
chr4	3531532	3531998	16	NM_002337	LRPAP1	-732
chr4	3531532	3531998	16	NR_110005	LRPAP1	-384
chr4	36278756	36279257	16	NM_001136536	DTHD1	-2608
chr4	40514721	40515205	16	NM_019027	RBM47	-1010
chr4	55851915	55852304	16	NM_001024924	EXOC1	-1540
chr4	55851915	55852304	16	NM_178237	EXOC1	-1540
chr4	55851915	55852304	16	NM_018261	EXOC1	-1540
chr4	75724015	75724579	16	NM_001290049	USO1	-224
chr4	75724015	75724579	16	NM_003715	USO1	-224
chr4	78062228	78062623	16	NM_001166133	FRAS1	4856
chr4	78062228	78062623	16	NM_025074	FRAS1	4856
chr5	119269309	119269632	16	NM_001286817	TNFAIP8	779
chr5	119269309	119269632	16	NM_001286815	TNFAIP8	779
chr5	119269309	119269632	16	NM_001077654	TNFAIP8	779
chr5	133423720	133424063	16	NR_031621	MIR1289-2	-3815
chr5	142685946	142686266	16	NM_000800	FGF1	-389
chr5	142685946	142686266	16	NM_001257211	FGF1	403
chr5	142685946	142686266	16	NM_001257208	FGF1	403
chr5	142685946	142686266	16	NM_033136	FGF1	-389
chr5	142685946	142686266	16	NM_001257209	FGF1	403
chr5	142685946	142686266	16	NM_001257207	FGF1	-389
chr5	148825925	148826781	16	NM_000024	ADRB2	-239
chr5	157464505	157465093	16	NM_001172292	NIPAL4	4781
chr5	157464505	157465093	16	NM_001099287	NIPAL4	4781
chr5	159331231	159331709	16	NR_037889	LOC285626	-47
chr5	159331231	159331709	16	NM_002187	IL12B	997
chr5	58462075	58462537	16	NM_001252226	PLK2	2167
chr5	58462075	58462537	16	NM_006622	PLK2	2167
chr5	69416727	69417272	16	NM_001038603	MARVELD2	1888
chr5	69416727	69417272	16	NM_001244734	MARVELD2	1888
chr5	76711522	76712154	16	NM_001992	F2R	-4204
chr5	76711522	76712154	16	NR_028375	NCRUPAR	-564
chr5	96075513	96076108	16	NR_030309	MIR583	-3327
chr5	96934573	96935069	16	NM_005575	LNPEP	-820
chr6	106098285	106099045	16	NM_182907	PRDM1	-196
chr6	113645548	113646163	16	NR_125844	LOC101927686	-4220
chr6	31057850	31058578	16	NR_003948	HCG22	4765
chr6	31823132	31823520	16	NM_005346	HSPA1B	-4408
chr6	42221460	42222000	16	NM_018141	MRPS10	3835
chr6	73264319	73264874	16	NM_030568	KHDC1	1400
chr7	101630581	101631318	16	NM_138403	MYL10	1653
chr7	116284351	116284828	16	NR_130921	LOC102724434	-2075
chr7	116284351	116284828	16	NR_130922	LOC102724434	-2138
chr7	116284351	116284828	16	NR_130923	LOC102724434	-2075
chr7	129184917	129185373	16	NM_005631	SMO	-3726
chr7	22565262	22565925	16	NR_038393	LOC100506178	2257
chr7	22859647	22860033	16	NR_003075	SNORD93	3228
chr7	2509829	2510197	16	NM_001166355	LFNG	-2515
chr7	28408790	28409425	16	NM_182898	CREB5	-3417
chr7	41698838	41699258	16	NM_002192	INHBA	-4060
chr7	43522337	43522846	16	NR_038276	LOC100506895	49
chr7	75875606	75876097	16	NM_001040457	RHBDD2	-3147
chr7	75875606	75876097	16	NM_001040456	RHBDD2	-3147
chr7	99786706	99787075	16	NM_001202855	CYP3A4	2702
chr7	99786706	99787075	16	NM_017460	CYP3A4	2702
chr8	127795326	127796194	16	NR_031609	MIR1204	-201
chr8	143280721	143281155	16	NR_120683	LOC100507316	-762
chr8	143280721	143281155	16	NR_120682	LOC100507316	-762
chr8	20270914	20271372	16	NR_047509	LZTS1-AS1	-4629
chr8	38148947	38149368	16	NM_000349	STAR	-1925
chr8	55772107	55772842	16	NM_001286661	TMEM68	-933
chr8	55772107	55772842	16	NM_001286660	TMEM68	-933
chr8	55772107	55772842	16	NM_152417	TMEM68	-933
chr8	55772107	55772842	16	NM_024831	TGS1	-757
chr8	78560588	78560994	16	NR_125389	LOC101927003	2288
chr9	111040431	111040976	16	NM_001401	LPAR1	2618
chr9	111040431	111040976	16	NM_057159	LPAR1	2618
chr9	126915788	126916232	16	NM_014636	RALGPS1	1237
chr9	126915788	126916232	16	NM_001190729	RALGPS1	1237
chr9	126915788	126916232	16	NM_001190730	RALGPS1	1237
chr9	137425525	137425826	16	NM_001256067	NOXA1	2281
chr9	137425525	137425826	16	NM_017820	EXD3	2413
chr9	137425525	137425826	16	NM_001256068	NOXA1	2281
chr9	137425525	137425826	16	NR_104598	EXD3	2413
chr9	137425525	137425826	16	NM_006647	NOXA1	2281
chr9	137425525	137425826	16	NM_001286823	EXD3	2413
chr9	137425525	137425826	16	NR_104599	EXD3	2413
chr9	4788525	4789043	16	NM_001286700	RCL1	-4049
chr9	4788525	4789043	16	NM_001286699	RCL1	-4049
chr9	4788525	4789043	16	NM_005772	RCL1	-4049
chrX	112818741	112819220	16	NM_001113490	AMOT	-4146
chrX	115594220	115594838	16	NM_001136025	PLS3	1023
chrX	115594220	115594838	16	NM_001172335	PLS3	1023
chrX	115594220	115594838	16	NM_001282338	PLS3	1023
chrX	48917230	48917658	16	NM_006875	PIM2	-1692
chr1	109911263	109911925	15	NM_172211	CSF1	984
chr1	109911263	109911925	15	NM_000757	CSF1	984
chr1	109911263	109911925	15	NM_172210	CSF1	984
chr1	109911263	109911925	15	NM_172212	CSF1	984
chr1	1162892	1163532	15	NR_029834	MIR200A	-4650
chr1	1162892	1163532	15	NR_029639	MIR200B	-3891
chr1	155683756	155684284	15	NM_001198899	YY1AP1	4191
chr1	155683756	155684284	15	NM_139119	YY1AP1	-4754
chr1	155683756	155684284	15	NM_001198903	YY1AP1	-4636
chr1	155683756	155684284	15	NM_001198902	YY1AP1	-4704
chr1	155683756	155684284	15	NM_139121	YY1AP1	-4953
chr1	155683756	155684284	15	NM_001198900	YY1AP1	-4757
chr1	155683756	155684284	15	NM_001198905	YY1AP1	-4757
chr1	155683756	155684284	15	NM_018253	YY1AP1	-4757
chr1	155683756	155684284	15	NM_001198904	YY1AP1	-4636
chr1	15765306	15765665	15	NM_001024216	FBLIM1	522
chr1	15765306	15765665	15	NM_001024215	FBLIM1	987
chr1	160116829	160117271	15	NM_000702	ATP1A2	1321
chr1	203303436	203303960	15	NR_034151	LINC01136	-1627
chr1	203303436	203303960	15	NR_034150	LINC01136	-1627
chr1	203303436	203303960	15	NM_006763	BTG2	-1837
chr1	205318055	205318580	15	NM_030952	NUAK2	-3474
chr1	20735587	20736101	15	NM_001103161	SH2D5	3204
chr1	20735587	20736101	15	NM_001103160	SH2D5	3204
chr1	210329154	210329632	15	NM_001170587	HHAT	488
chr1	210329154	210329632	15	NM_001122834	HHAT	1142
chr1	210329154	210329632	15	NM_001170588	HHAT	488
chr1	210329154	210329632	15	NM_001170580	HHAT	98
chr1	210329154	210329632	15	NM_018194	HHAT	488
chr1	210329154	210329632	15	NM_001170564	HHAT	1142
chr1	211258745	211259169	15	NM_001136223	RCOR3	-408
chr1	211258745	211259169	15	NM_018254	RCOR3	-989
chr1	211258745	211259169	15	NM_001136225	RCOR3	-408
chr1	211258745	211259169	15	NM_001136224	RCOR3	-408
chr1	213055031	213055365	15	NM_001287219	RPS6KC1	3966
chr1	213055031	213055365	15	NM_012424	RPS6KC1	3966
chr1	213055031	213055365	15	NM_001287221	RPS6KC1	3966
chr1	213055031	213055365	15	NM_001287218	RPS6KC1	3966
chr1	213055031	213055365	15	NM_001136138	RPS6KC1	3966
chr1	213055031	213055365	15	NM_001287220	RPS6KC1	3966
chr1	21439814	21440197	15	NM_001256417	NBPF3	-84
chr1	21439814	21440197	15	NR_046176	NBPF3	-84
chr1	21439814	21440197	15	NM_032264	NBPF3	-84
chr1	21439814	21440197	15	NM_001256416	NBPF3	-84
chr1	215001598	215002020	15	NM_001017424	KCNK2	-3732
chr1	22142209	22142532	15	NM_030761	WNT4	-656
chr1	26858967	26859330	15	NM_006142	SFN	-3993
chr1	36150321	36150824	15	NM_001270894	TRAPPC3	1058
chr1	36150321	36150824	15	NM_001270897	TRAPPC3	1058
chr1	36150321	36150824	15	NM_014408	TRAPPC3	1058
chr1	36150321	36150824	15	NR_073098	TRAPPC3	1058
chr1	36150321	36150824	15	NR_073097	TRAPPC3	1058
chr1	36150321	36150824	15	NM_001270896	TRAPPC3	1058
chr1	41358086	41358989	15	NM_001291281	FOXO6	-3393
chr1	44799722	44800286	15	NM_004073	PLK3	-359
chr1	46611583	46612118	15	NM_145279	MOB3C	-3283
chr1	629804	630091	15	NR_125957	LOC101928626	938
chr1	629804	630091	15	NR_106781	MIR6723	-2466
chr1	66934417	66934786	15	NM_001077701	MIER1	4359
chr1	66934417	66934786	15	NM_001077704	MIER1	4359
chr10	12725480	12725878	15	NR_031752	MIR548Q	326
chr10	132447805	132448206	15	NM_173541	C10orf91	2796
chr10	133274760	133275181	15	NM_001164490	ADAM8	-1933
chr10	133274760	133275181	15	NM_001164489	ADAM8	-1933
chr10	133274760	133275181	15	NM_001109	ADAM8	-1933
chr10	37976642	37977056	15	NM_145011	ZNF25	324
chr10	75294852	75295240	15	NR_038225	ZNF503-AS1	-1336
chr10	75294852	75295240	15	NR_038226	ZNF503-AS1	-1336
chr10	75294852	75295240	15	NR_038224	ZNF503-AS1	-1336
chr10	75294852	75295240	15	NR_038223	ZNF503-AS1	-1336
chr10	88851735	88852128	15	NM_144590	ANKRD22	-44
chr10	94362855	94363198	15	NM_022451	NOC3L	50
chr11	111510223	111510777	15	NR_029840	MIR34C	-2938
chr11	111510223	111510777	15	NR_029839	MIR34B	-2437
chr11	111510223	111510777	15	NM_207430	C11orf88	-4284
chr11	111510223	111510777	15	NM_017589	BTG4	-1854
chr11	111510223	111510777	15	NM_001100388	C11orf88	-4284
chr11	118074847	118075295	15	NM_019894	TMPRSS4	-1940
chr11	118074847	118075295	15	NM_001083947	TMPRSS4	-1940
chr11	118074847	118075295	15	NM_001290094	TMPRSS4	-1940
chr11	118074847	118075295	15	NR_110734	TMPRSS4	-1940
chr11	118074847	118075295	15	NM_001173551	TMPRSS4	-1940
chr11	118074847	118075295	15	NM_001290096	TMPRSS4	-1940
chr11	118074847	118075295	15	NM_001173552	TMPRSS4	-1940
chr11	128887915	128888365	15	NM_000890	KCNJ5	-3277
chr11	128940162	128941076	15	NM_001195195	TP53AIP1	-2780
chr11	128940162	128941076	15	NM_022112	TP53AIP1	-2780
chr11	128940162	128941076	15	NM_001195194	TP53AIP1	2785
chr11	128940162	128941076	15	NM_001251964	TP53AIP1	-2780
chr11	30322934	30323392	15	NM_152316	ARL14EP	65
chr11	393209	393551	15	NM_001303029	PKP3	782
chr11	393209	393551	15	NM_007183	PKP3	-802
chr11	47248658	47249018	15	NM_001302491	ACP2	-9
chr11	47248658	47249018	15	NM_001251935	NR1H3	539
chr11	47248658	47249018	15	NM_001130102	NR1H3	-59
chr11	47248658	47249018	15	NM_001610	ACP2	-9
chr11	47248658	47249018	15	NM_001302489	ACP2	210
chr11	47248658	47249018	15	NM_001251934	NR1H3	539
chr11	47248658	47249018	15	NM_001302492	ACP2	-9
chr11	47248658	47249018	15	NM_001302490	ACP2	-9
chr11	65386240	65386656	15	NM_001077241	SLC25A45	3774
chr11	65386240	65386656	15	NM_001278251	SLC25A45	2747
chr11	65386240	65386656	15	NM_001300833	FRMD8	-121
chr11	65386240	65386656	15	NM_001300832	FRMD8	-121
chr11	65386240	65386656	15	NM_182556	SLC25A45	3774
chr11	65386240	65386656	15	NM_001300820	SLC25A45	4062
chr11	65386240	65386656	15	NM_001278250	SLC25A45	4062
chr11	65386240	65386656	15	NM_031904	FRMD8	-121
chr11	65793163	65793518	15	NR_108085	OVOL1-AS1	2472
chr11	73647724	73648270	15	NM_001130036	PLEKHB1	-692
chr11	73647724	73648270	15	NM_001130034	PLEKHB1	449
chr11	73647724	73648270	15	NM_001130035	PLEKHB1	449
chr11	73647724	73648270	15	NM_021200	PLEKHB1	1820
chr11	73647724	73648270	15	NM_001130033	PLEKHB1	1820
chr12	106138914	106139489	15	NM_014840	NUAK1	-832
chr12	108562428	108563300	15	NM_001301141	ISCU	1402
chr12	108562428	108563300	15	NM_014706	SART3	1475
chr12	108562428	108563300	15	NM_014301	ISCU	1402
chr12	108562428	108563300	15	NM_213595	ISCU	1402
chr12	108562428	108563300	15	NM_001301140	ISCU	1402
chr12	112112658	112113156	15	NM_024953	NAA25	4076
chr12	112936972	112937391	15	NM_006187	OAS3	-1251
chr12	2004451	2004879	15	NM_152640	DCP1B	154
chr12	40831930	40832278	15	NM_001256064	CNTN1	4167
chr12	50928264	50928698	15	NM_014033	METTL7A	3731
chr12	52215555	52215982	15	NR_027358	LINC00592	4839
chr12	52215555	52215982	15	NM_001242696	C12orf80	4913
chr12	53224434	53224880	15	NM_001243732	RARG	4244
chr12	53224434	53224880	15	NM_001042728	RARG	4244
chr12	57509994	57510338	15	NR_106816	MIR6758	-2521
chr12	62467100	62467604	15	NM_001278472	MON2	536
chr12	62467100	62467604	15	NM_001278471	MON2	536
chr12	62467100	62467604	15	NM_001278470	MON2	536
chr12	62467100	62467604	15	NM_015026	MON2	536
chr12	62467100	62467604	15	NM_001278469	MON2	536
chr13	38346748	38347118	15	NR_104584	UFM1	-2837
chr13	38346748	38347118	15	NM_001286703	UFM1	-2837
chr13	38346748	38347118	15	NM_001286705	UFM1	-2837
chr13	38346748	38347118	15	NM_001286706	UFM1	-2837
chr13	38346748	38347118	15	NM_016617	UFM1	-2837
chr13	38346748	38347118	15	NM_001286704	UFM1	-2837
chr13	38346748	38347118	15	NR_104585	UFM1	-2837
chr13	48072288	48072623	15	NR_046511	MED4-AS1	-4681
chr13	51583823	51584206	15	NM_052950	WDFY2	-333
chr13	52454454	52454850	15	NM_001282169	VPS36	4408
chr13	52454454	52454850	15	NM_001282168	VPS36	3974
chr13	52454454	52454850	15	NM_001286687	CKAP2	-707
chr13	52454454	52454850	15	NM_001098525	CKAP2	-707
chr13	52454454	52454850	15	NM_016075	VPS36	3974
chr13	52454454	52454850	15	NM_018204	CKAP2	-707
chr13	52454454	52454850	15	NM_001286686	CKAP2	-1319
chr14	100107307	100107692	15	NR_039601	MIR151B	-2015
chr14	100107307	100107692	15	NR_029888	MIR342	-2155
chr14	23366609	23367068	15	NM_001277174	EFS	1205
chr14	23366609	23367068	15	NM_032459	EFS	1205
chr14	23366609	23367068	15	NM_005864	EFS	1205
chr14	61322511	61323362	15	NM_006255	PRKCH	1494
chr14	92103399	92103754	15	NM_001127696	ATXN3	-3045
chr14	92103399	92103754	15	NR_028470	ATXN3	-3045
chr14	92103399	92103754	15	NR_028459	ATXN3	-3045
chr14	92103399	92103754	15	NR_028467	ATXN3	-3045
chr14	92103399	92103754	15	NR_028455	ATXN3	-3045
chr14	92103399	92103754	15	NR_028462	ATXN3	-3045
chr14	92103399	92103754	15	NM_001164776	ATXN3	-3045
chr14	92103399	92103754	15	NR_028461	ATXN3	-3045
chr14	92103399	92103754	15	NR_028456	ATXN3	-3045
chr14	92103399	92103754	15	NM_001164774	ATXN3	-3045
chr14	92103399	92103754	15	NR_028458	ATXN3	-3045
chr14	92103399	92103754	15	NR_028463	ATXN3	-3045
chr14	92103399	92103754	15	NR_028464	ATXN3	-3045
chr14	92103399	92103754	15	NM_001164779	ATXN3	-3045
chr14	92103399	92103754	15	NR_028454	ATXN3	-3045
chr14	92103399	92103754	15	NM_001164777	ATXN3	-3045
chr14	92103399	92103754	15	NM_030660	ATXN3	-3045
chr14	92103399	92103754	15	NR_028468	ATXN3	-3045
chr14	92103399	92103754	15	NR_028457	ATXN3	-3045
chr14	92103399	92103754	15	NR_028469	ATXN3	-3045
chr14	92103399	92103754	15	NR_028465	ATXN3	-3045
chr14	92103399	92103754	15	NM_001164782	ATXN3	-3045
chr14	92103399	92103754	15	NR_031765	ATXN3	-3045
chr14	92103399	92103754	15	NM_001127697	ATXN3	-3045
chr14	92103399	92103754	15	NM_001164780	ATXN3	-3045
chr14	92103399	92103754	15	NM_004993	ATXN3	-3045
chr14	92103399	92103754	15	NR_028460	ATXN3	-3045
chr14	92103399	92103754	15	NM_001164781	ATXN3	-3045
chr14	92103399	92103754	15	NR_028466	ATXN3	-3045
chr14	92103399	92103754	15	NR_028453	ATXN3	-3045
chr14	92103399	92103754	15	NM_001164778	ATXN3	-3045
chr14	99484118	99484515	15	NM_199123	SETD3	3427
chr14	99484118	99484515	15	NM_001099402	CCNK	2915
chr14	99484118	99484515	15	NM_032233	SETD3	3427
chr15	42154586	42155022	15	NR_033151	PLA2G4F	-1837
chr15	42154586	42155022	15	NM_213600	PLA2G4F	-1837
chr15	60392980	60393433	15	NM_001136015	ANXA2	-4780
chr15	60392980	60393433	15	NM_004039	ANXA2	-4780
chr15	60392980	60393433	15	NM_001002857	ANXA2	-4780
chr15	60392980	60393433	15	NM_001002858	ANXA2	-4780
chr15	62307381	62307840	15	NR_107034	MIR8067	2876
chr15	75741235	75741569	15	NR_024595	DNM1P35	1325
chr15	83284600	83285191	15	NM_001301206	BNC1	1438
chr15	83284600	83285191	15	NM_001717	BNC1	179
chr16	1949624	1950404	15	NM_005061	RPL3L	-4664
chr16	30469547	30469875	15	NM_001114380	ITGAL	-2950
chr16	30469547	30469875	15	NM_002209	ITGAL	-2950
chr16	3100238	3100704	15	NM_001282415	ZSCAN10	1154
chr16	3100238	3100704	15	NM_032805	ZSCAN10	1154
chr16	3100238	3100704	15	NM_001282416	ZSCAN10	1154
chr16	4618890	4619322	15	NM_145253	UBALD1	4180
chr16	54929407	54929763	15	NM_005853	IRX5	-1613
chr16	54929407	54929763	15	NR_110453	CRNDE	396
chr16	54929407	54929763	15	NR_034106	CRNDE	807
chr16	54929407	54929763	15	NR_110454	CRNDE	807
chr16	54929407	54929763	15	NM_001252197	IRX5	-1613
chr16	54929407	54929763	15	NR_034105	CRNDE	396
chr16	85751069	85751697	15	NM_206967	C16orf74	300
chr17	30290974	30291777	15	NM_000386	BLMH	-791
chr17	35750900	35751374	15	NM_139285	GAS2L2	-1741
chr17	3888174	3888675	15	NM_172207	CAMKK1	-4619
chr17	3888174	3888675	15	NM_032294	CAMKK1	-4619
chr17	3888174	3888675	15	NM_172206	CAMKK1	-2319
chr17	41588178	41588491	15	NM_000526	KRT14	1439
chr17	41620969	41621539	15	NM_000422	KRT17	-3376
chr17	48045620	48046226	15	NM_003204	NFE2L1	-2400
chr17	69316786	69317171	15	NM_018672	ABCA5	1345
chr17	729654	730109	15	NM_024792	FAM57A	-2725
chr17	74427451	74427781	15	NM_022036	GPRC5C	-3911
chr17	76666784	76667317	15	NR_130916	LOC105274304	-4877
chr18	31042614	31043256	15	NM_024423	DSC3	120
chr18	31042614	31043256	15	NM_001941	DSC3	120
chr18	48955107	48955793	15	NM_001190821	SMAD7	4739
chr18	48955107	48955793	15	NM_005904	SMAD7	4739
chr19	10285937	10286454	15	NM_003259	ICAM5	-3783
chr19	10285937	10286454	15	NM_022377	ICAM4	-771
chr19	10285937	10286454	15	NM_001039132	ICAM4	-771
chr19	10285937	10286454	15	NM_001544	ICAM4	-771
chr19	11815200	11815567	15	NM_152357	ZNF440	1092
chr19	1210282	1210729	15	NM_000455	STK11	4707
chr19	17458950	17459342	15	NM_138454	NXNL1	-1770
chr19	18224360	18224927	15	NM_001098818	PDE4C	-1832
chr19	18224360	18224927	15	NM_001098819	PDE4C	150
chr19	18224360	18224927	15	NR_040546	PDE4C	-1832
chr19	41427407	41427821	15	NM_198540	B3GNT8	-1116
chr19	49056013	49056456	15	NM_033142	CGB7	494
chr19	659527	659856	15	NM_194460	RNF126	-3542
chr2	108620998	108621438	15	NM_001193484	LIMS1	-27
chr2	111120550	111120956	15	NM_138625	BCL2L11	-160
chr2	111120550	111120956	15	NM_138623	BCL2L11	-160
chr2	111120550	111120956	15	NM_001204110	BCL2L11	-160
chr2	111120550	111120956	15	NM_001204107	BCL2L11	-160
chr2	111120550	111120956	15	NM_001204108	BCL2L11	-160
chr2	111120550	111120956	15	NM_006538	BCL2L11	-160
chr2	111120550	111120956	15	NM_138624	BCL2L11	-160
chr2	111120550	111120956	15	NM_207002	BCL2L11	-160
chr2	111120550	111120956	15	NM_138627	BCL2L11	-160
chr2	111120550	111120956	15	NM_207003	BCL2L11	-160
chr2	111120550	111120956	15	NM_138621	BCL2L11	-160
chr2	111120550	111120956	15	NM_138626	BCL2L11	-160
chr2	111120550	111120956	15	NM_001204109	BCL2L11	-160
chr2	111120550	111120956	15	NM_138622	BCL2L11	-160
chr2	111120550	111120956	15	NM_001204113	BCL2L11	-160
chr2	111120550	111120956	15	NM_001204106	BCL2L11	-160
chr2	111120550	111120956	15	NM_001204112	BCL2L11	-160
chr2	111120550	111120956	15	NM_001204111	BCL2L11	-160
chr2	127416105	127416674	15	NM_000312	PROC	-2030
chr2	13008967	13009430	15	NR_038434	LOC100506474	2185
chr2	151258079	151258504	15	NM_198557	RBM43	-3584
chr2	177313450	177313749	15	NR_106767	MIR6512	-283
chr2	215137787	215138324	15	NM_173076	ABCA12	-373
chr2	215137787	215138324	15	NR_103740	ABCA12	-373
chr2	218125739	218126286	15	NM_001557	CXCR2	0
chr2	218125739	218126286	15	NM_001168298	CXCR2	723
chr2	218218917	218219392	15	NM_152862	ARPC2	2061
chr2	218218917	218219392	15	NM_005731	ARPC2	1758
chr2	218383809	218384189	15	NM_000578	SLC11A1	1971
chr2	218883468	218883790	15	NM_025216	WNT10A	3097
chr2	27081244	27081643	15	NM_007046	EMILIN1	2877
chr2	37196511	37197018	15	NR_037879	CEBPZOS	273
chr2	37196511	37197018	15	NR_037880	CEBPZOS	273
chr2	42572273	42572622	15	NM_001282756	MTA3	4403
chr2	42572273	42572622	15	NM_020744	MTA3	3931
chr2	72827948	72828309	15	NM_015189	EXOC6B	2080
chr2	95274603	95275110	15	NM_001165978	PROM2	404
chr2	95274603	95275110	15	NM_001165977	PROM2	404
chr2	95274603	95275110	15	NM_144707	PROM2	404
chr2	96854972	96855327	15	NM_016466	ANKRD39	-2870
chr20	33404174	33404637	15	NM_001278168	CDK5RAP1	2836
chr20	33404174	33404637	15	NM_001278167	CDK5RAP1	2836
chr20	33404174	33404637	15	NM_001278169	CDK5RAP1	2836
chr20	33404174	33404637	15	NM_016082	CDK5RAP1	2836
chr20	33404174	33404637	15	NM_016408	CDK5RAP1	2836
chr20	34314472	34314866	15	NM_001161766	AHCY	2867
chr20	35746895	35747266	15	NR_040722	RBM39	4744
chr20	35746895	35747266	15	NR_040724	RBM39	4744
chr20	35746895	35747266	15	NM_001242599	RBM39	4744
chr20	35746895	35747266	15	NM_004902	RBM39	4744
chr20	35746895	35747266	15	NM_001242600	RBM39	4744
chr20	35746895	35747266	15	NM_184234	RBM39	4744
chr20	35746895	35747266	15	NR_040723	RBM39	4744
chr20	3767572	3768171	15	NM_001039140	C20orf27	66
chr20	3767572	3768171	15	NR_047675	C20orf27	-517
chr20	3767572	3768171	15	NM_001258430	C20orf27	66
chr20	3767572	3768171	15	NM_001258429	C20orf27	66
chr20	58312791	58313246	15	NR_003505	PPP4R1L	3579
chr20	58312791	58313246	15	NM_020673	RAB22A	3304
chr20	843915	844287	15	NM_031424	FAM110A	-506
chr20	843915	844287	15	NM_001289147	FAM110A	2827
chr21	17921577	17921977	15	NM_001204175	CHODL	4438
chr21	17921577	17921977	15	NM_001204176	CHODL	4438
chr21	17921577	17921977	15	NM_001204177	CHODL	4438
chr21	17921577	17921977	15	NM_001204178	CHODL	4438
chr21	38256900	38257200	15	NM_170736	KCNJ15	247
chr21	38256900	38257200	15	NM_001276436	KCNJ15	353
chr21	38256900	38257200	15	NM_001276435	KCNJ15	353
chr21	38256900	38257200	15	NM_002243	KCNJ15	353
chr22	36530166	36530541	15	NM_003753	EIF3D	1123
chr22	37563712	37564323	15	NM_152243	CDC42EP1	3554
chr22	39928581	39928946	15	NM_001291824	GRAP2	2173
chr22	39928581	39928946	15	NM_001291826	GRAP2	2173
chr22	39928581	39928946	15	NM_001291828	GRAP2	2136
chr22	41288274	41288922	15	NM_002883	RANGAP1	2347
chr22	41288274	41288922	15	NM_001278651	RANGAP1	2581
chr3	126472281	126472831	15	NR_104249	ZXDC	-3363
chr3	126472281	126472831	15	NM_025112	ZXDC	-3363
chr3	126472281	126472831	15	NM_001040653	ZXDC	-3363
chr3	136022633	136023207	15	NM_181897	PPP2R3A	186
chr3	159763391	159763875	15	NR_121669	IQCJ-SCHIP1-AS1	-4979
chr3	169772730	169773456	15	NM_032487	ACTRT3	3198
chr3	169772730	169773456	15	NR_033702	MYNN	29
chr3	169772730	169773456	15	NM_018657	MYNN	29
chr3	169772730	169773456	15	NM_001185118	MYNN	29
chr3	169772730	169773456	15	NR_033703	MYNN	29
chr3	169772730	169773456	15	NM_001185119	MYNN	-1171
chr3	186640421	186640907	15	NM_014375	FETUB	305
chr3	195131154	195131624	15	NR_036089	MIR3137	-3191
chr3	197575408	197575814	15	NM_203315	BDH1	2288
chr3	51956408	51956793	15	NM_080865	GPR62	1287
chr3	64186913	64187353	15	NR_046702	PRICKLE2-AS3	-410
chr4	15001141	15001552	15	NR_038857	CPEB2-AS1	-699
chr4	15001141	15001552	15	NM_001177383	CPEB2	-1327
chr4	15001141	15001552	15	NM_182646	CPEB2	-1327
chr4	15001141	15001552	15	NM_001177381	CPEB2	-1327
chr4	15001141	15001552	15	NM_001177384	CPEB2	-1327
chr4	15001141	15001552	15	NM_182485	CPEB2	-1327
chr4	15001141	15001552	15	NM_001177382	CPEB2	-1327
chr4	37686685	37687050	15	NM_001085400	RELL1	490
chr4	37686685	37687050	15	NM_001085399	RELL1	490
chr4	40506571	40506996	15	NR_039966	MIR4802	4664
chr4	53991649	53992281	15	NR_027153	RPL21P44	4683
chr4	55397738	55398066	15	NR_073070	TMEM165	1990
chr4	55397738	55398066	15	NM_018475	TMEM165	1990
chr5	132074486	132074976	15	NM_000758	CSF2	940
chr5	132259219	132259788	15	NM_001131027	PDLIM4	1846
chr5	132259219	132259788	15	NM_003687	PDLIM4	1846
chr5	140348153	140348595	15	NM_001945	HBEGF	1771
chr5	180072002	180072548	15	NM_018434	RNF130	157
chr5	180072002	180072548	15	NM_001280801	RNF130	157
chr5	59767799	59768826	15	NM_001197218	PDE4D	-300
chr5	61163315	61163676	15	NR_109908	CTC-436P18.1	1180
chr5	61163315	61163676	15	NM_001048249	SMIM15	1020
chr6	100880598	100881398	15	NM_001284271	ASCC3	-374
chr6	100880598	100881398	15	NM_022091	ASCC3	-374
chr6	100880598	100881398	15	NM_006828	ASCC3	-374
chr6	137216996	137217620	15	NM_000416	IFNGR1	-2122
chr6	138105398	138105765	15	NM_022121	PERP	-1942
chr6	29679920	29680262	15	NM_001109809	ZFP57	2937
chr6	35454036	35454669	15	NM_021922	FANCE	1992
chr6	43233367	43233719	15	NM_006443	DNPH1	4070
chr6	43233367	43233719	15	NM_199184	DNPH1	4070
chr6	44309029	44309538	15	NM_020745	AARS2	-4043
chr6	56642703	56643206	15	NM_015548	DST	58
chr6	56642703	56643206	15	NM_001723	DST	58
chr6	87789207	87789658	15	NR_110869	LOC101928911	4573
chr7	100867995	100868605	15	NR_106935	MIR6875	265
chr7	100867995	100868605	15	NM_003302	TRIP6	973
chr7	128236960	128237447	15	NM_000230	LEP	-4074
chr7	135213595	135214250	15	NM_014149	WDR91	2358
chr7	144407309	144407993	15	NM_001080413	NOBOX	-2576
chr7	2758188	2758706	15	NM_001282440	GNA12	-4693
chr7	44544144	44544449	15	NM_001101648	NPC1L1	2981
chr7	44544144	44544449	15	NM_013389	NPC1L1	2981
chr7	44544144	44544449	15	NM_001300967	NPC1L1	2981
chr7	5596123	5596768	15	NM_003088	FSCN1	3641
chr7	76297378	76297872	15	NM_001540	HSPB1	-4932
chr7	77122119	77122683	15	NM_020879	CCDC146	-215
chr7	80920075	80920450	15	NM_006379	SEMA3C	911
chr7	99505038	99505411	15	NM_032164	ZNF394	4970
chr7	99505038	99505411	15	NM_145102	ZKSCAN5	575
chr7	99505038	99505411	15	NM_014569	ZKSCAN5	275
chr8	100103896	100104351	15	NM_001286692	RGS22	-1993
chr8	100103896	100104351	15	NM_015668	RGS22	-1993
chr8	100103896	100104351	15	NM_001286693	RGS22	-1503
chr8	102236675	102237051	15	NM_001172478	RRM2B	-2255
chr8	102236675	102237051	15	NM_015713	RRM2B	-2255
chr8	102236675	102237051	15	NM_001172477	RRM2B	-1968
chr8	102236675	102237051	15	NR_125415	LOC101927221	-2587
chr8	103298681	103299029	15	NM_003506	FZD6	25
chr8	103298681	103299029	15	NM_001164615	FZD6	423
chr8	103298681	103299029	15	NM_001164616	FZD6	25
chr8	10841488	10841856	15	NM_001284356	PINX1	1773
chr8	10841488	10841856	15	NR_125432	LOC101929229	1647
chr8	10841488	10841856	15	NM_017884	PINX1	1773
chr8	48923312	48923808	15	NM_003068	SNAI2	2120
chr8	55764394	55764786	15	NM_001286657	TMEM68	610
chr9	108859724	108860144	15	NM_006686	ACTL7B	3939
chr9	108859724	108860144	15	NM_006687	ACTL7A	-2293
chr9	109318210	109318552	15	NM_018424	EPB41L4B	-2583
chr9	109318210	109318552	15	NM_019114	EPB41L4B	-2583
chr9	112332775	112333304	15	NM_001244897	PTBP3	-625
chr9	112332775	112333304	15	NM_005156	PTBP3	-625
chr9	112332775	112333304	15	NM_001163790	PTBP3	-625
chr9	112332775	112333304	15	NM_001244898	PTBP3	13
chr9	112332775	112333304	15	NM_001163788	PTBP3	-625
chr9	112332775	112333304	15	NM_001244896	PTBP3	-625
chr9	113585533	113585961	15	NM_001282922	RGS3	4871
chr9	124779382	124779822	15	NM_182487	OLFML2A	2445
chr9	33080505	33080908	15	NM_018225	SMU1	3990
chr9	33167473	33167903	15	NR_108110	B4GALT1-AS1	741
chr9	33167473	33167903	15	NM_001497	B4GALT1	330
chr9	33167473	33167903	15	NR_108109	B4GALT1-AS1	741
chr9	33167473	33167903	15	NR_108108	B4GALT1-AS1	-170
chr9	4743199	4743725	15	NM_001199853	AK3	1419
chr9	4743199	4743725	15	NM_016282	AK3	2153
chr9	4743199	4743725	15	NM_001199855	AK3	1663
chr9	4743199	4743725	15	NM_001199852	AK3	2153
chr9	63338293	63338630	15	NR_026558	AQP7P3	4182
chr9	63338293	63338630	15	NR_002817	AQP7P1	3941
chr9	94805543	94805985	15	NR_031755	MIR2278	-4197
chr9	96301948	96302373	15	NM_000197	HSD17B3	8
chrX	153723121	153723873	15	NM_001139457	BCAP31	-604
chrX	153723121	153723873	15	NM_001256447	BCAP31	-1249
chrX	153723121	153723873	15	NM_005745	BCAP31	-886
chrX	153723121	153723873	15	NM_001139441	BCAP31	-630
chrX	153723121	153723873	15	NM_000033	ABCD1	-1370
chrX	153764004	153764401	15	NM_005393	PLXNB3	7
chrX	153764004	153764401	15	NM_001163257	PLXNB3	7
chrX	153778751	153779078	15	NM_014370	SRPK3	-2086
chrX	153778751	153779078	15	NM_001170761	SRPK3	-2086
chrX	153778751	153779078	15	NM_001170760	SRPK3	-2086
chrX	153794063	153794568	15	NM_001204526	SSR4	-133
chrX	153794063	153794568	15	NM_004135	IDH3G	-208
chrX	153794063	153794568	15	NM_001204527	SSR4	141
chrX	153794063	153794568	15	NM_174869	IDH3G	-208
chrX	153794063	153794568	15	NM_006280	SSR4	-248
chrX	153794063	153794568	15	NR_037927	SSR4	-133
chrX	154373558	154374015	15	NM_001456	FLNA	-852
chrX	154373558	154374015	15	NM_001110556	FLNA	-852
chrX	17374703	17375177	15	NM_001291867	NHS	-479
chrX	17374703	17375177	15	NM_198270	NHS	-479
chrX	49166491	49167518	15	NM_001099681	MAGIX	4162
chrX	49166491	49167518	15	NM_002668	PLP2	-4832
chrX	49166491	49167518	15	NM_024859	MAGIX	4162
chrX	49166491	49167518	15	NM_001099682	MAGIX	4162
chrX	49184649	49185011	15	NM_006150	PRICKLE3	-1493
chr1	11981233	11982166	14	NM_014874	MFN2	1519
chr1	11981233	11982166	14	NM_001127660	MFN2	1519
chr1	151858081	151858631	14	NM_182578	THEM5	4659
chr1	152774885	152775276	14	NM_178354	LCE1F	-1291
chr1	152972212	152972921	14	NM_173080	SPRR4	1914
chr1	153032973	153033489	14	NM_003125	SPRR1B	2029
chr1	153174506	153174985	14	NR_110685	LOC101928009	228
chr1	153565462	153566088	14	NM_005978	S100A2	-55
chr1	153774769	153775368	14	NM_024330	SLC27A3	-223
chr1	154937461	154937877	14	NM_006556	PMVK	661
chr1	155562865	155563314	14	NM_018489	ASH1L	556
chr1	155562865	155563314	14	NR_027023	ASH1L-AS1	1109
chr1	15765690	15766179	14	NM_001024216	FBLIM1	971
chr1	15765690	15766179	14	NM_001024215	FBLIM1	1436
chr1	161019998	161020367	14	NM_016946	F11R	-1161
chr1	1627186	1627584	14	NM_006983	MMP23B	-4795
chr1	181021935	181022682	14	NM_001286210	STX6	-813
chr1	181021935	181022682	14	NM_005819	STX6	-813
chr1	204366830	204367273	14	NR_027022	LINC00628	-2668
chr1	204494354	204494912	14	NM_002646	PIK3C2B	4287
chr1	206826539	206826999	14	NM_013371	IL19	-2107
chr1	212285302	212285717	14	NR_125984	LOC101929541	488
chr1	212285302	212285717	14	NM_006243	PPP2R5A	-27
chr1	221839896	221840321	14	NR_125989	LOC101929771	-558
chr1	231929330	231929736	14	NR_126441	DISC1-IT1	3700
chr1	23791831	23792138	14	NM_007260	LYPLA2	829
chr1	24418957	24419511	14	NM_020448	NIPAL3	3480
chr1	24418957	24419511	14	NM_001199012	STPG1	4137
chr1	26861899	26862352	14	NM_006142	SFN	-1016
chr1	27153235	27153670	14	NM_003047	SLC9A1	-1678
chr1	27153235	27153670	14	NR_046474	SLC9A1	-1678
chr1	28196857	28197227	14	NM_001164722	PTAFR	3106
chr1	28196857	28197227	14	NM_001164721	PTAFR	3106
chr1	28260166	28260532	14	NM_031459	SESN2	898
chr1	43937339	43937868	14	NM_057090	ARTN	4284
chr1	43937339	43937868	14	NM_057091	ARTN	4284
chr1	43937339	43937868	14	NM_001136215	ARTN	4284
chr1	56819005	56819375	14	NM_001004303	C1orf168	-506
chr1	67836695	67837165	14	NR_040077	GNG12-AS1	4643
chr1	67836695	67837165	14	NM_018841	GNG12	3458
chr1	85276637	85277149	14	NR_045484	LOC646626	536
chr1	85276637	85277149	14	NM_003921	BCL10	-11
chr10	100373148	100373500	14	NR_026762	OLMALINC	-251
chr10	26858555	26858976	14	NM_001178125	ABI1	-2322
chr10	26858555	26858976	14	NM_001012752	ABI1	-2322
chr10	26858555	26858976	14	NM_001178120	ABI1	-2322
chr10	26858555	26858976	14	NM_001012751	ABI1	-2322
chr10	26858555	26858976	14	NM_001178124	ABI1	-2322
chr10	26858555	26858976	14	NM_001178116	ABI1	-2322
chr10	26858555	26858976	14	NM_001178119	ABI1	-2322
chr10	26858555	26858976	14	NM_001178122	ABI1	-2322
chr10	26858555	26858976	14	NM_001178123	ABI1	-2322
chr10	26858555	26858976	14	NM_001012750	ABI1	-2322
chr10	26858555	26858976	14	NM_001178121	ABI1	-2322
chr10	26858555	26858976	14	NM_005470	ABI1	-2322
chr10	73920035	73920473	14	NM_001001791	C10orf55	-2523
chr10	89532586	89532911	14	NM_213606	SLC16A12	-2808
chr11	10505952	10506304	14	NM_001190702	MTRNR2L8	-3048
chr11	10505952	10506304	14	NR_039705	MIR4485	-2198
chr11	117824468	117824799	14	NM_021603	FXYD2	-3459
chr11	117824468	117824799	14	NM_001680	FXYD2	-111
chr11	12988939	12989260	14	NR_038904	LINC00958	-449
chr11	5690350	5690802	14	NM_006074	TRIM22	990
chr11	5690350	5690802	14	NM_001199573	TRIM22	990
chr11	57657181	57657638	14	NM_006831	CLP1	-334
chr11	57657181	57657638	14	NM_001142597	CLP1	-334
chr11	62560592	62561104	14	NR_037427	MIR3654	542
chr11	65493847	65494187	14	NR_002819	MALAT1	-3744
chr11	67584571	67585026	14	NM_000852	GSTP1	1204
chr11	72780373	72781023	14	NR_039841	MIR4692	-2831
chr11	78427886	78428261	14	NR_120564	LOC101928865	-1763
chr11	85806821	85807290	14	NM_001289608	SYTL2	-4104
chr11	85806821	85807290	14	NM_032943	SYTL2	-4104
chr11	86372623	86372937	14	NM_021827	CCDC81	-1955
chr11	86372623	86372937	14	NM_001156474	CCDC81	-1955
chr11	94305228	94305669	14	NM_001199206	IZUMO1R	-188
chr12	101877386	101877738	14	NM_018370	DRAM1	236
chr12	10392486	10393026	14	NM_007360	KLRK1	2702
chr12	116559128	116559808	14	NM_001085481	MAP1LC3B2	88
chr12	123085644	123086128	14	NR_038290	LOC100507091	4503
chr12	1616203	1616686	14	NM_030775	WNT5B	-611
chr12	50170371	50170739	14	NM_001281731	CERS5	3022
chr12	50170371	50170739	14	NR_104035	CERS5	3022
chr12	50170371	50170739	14	NM_147190	CERS5	3022
chr12	53498692	53499110	14	NM_004178	TARBP2	-2019
chr12	53498692	53499110	14	NM_134323	TARBP2	-2019
chr12	53498692	53499110	14	NM_134324	TARBP2	-2691
chr12	53498692	53499110	14	NM_006301	MAP3K12	-759
chr12	53498692	53499110	14	NM_001193511	MAP3K12	-759
chr12	55933284	55933867	14	NM_201445	DGKA	1548
chr12	55933284	55933867	14	NM_001345	DGKA	2414
chr12	55933284	55933867	14	NM_201554	DGKA	1548
chr12	55933284	55933867	14	NM_201444	DGKA	1548
chr12	56487917	56488274	14	NM_001280798	GLS2	-319
chr12	56487917	56488274	14	NM_001280796	GLS2	-319
chr12	56487917	56488274	14	NM_001280797	GLS2	-319
chr12	56487917	56488274	14	NM_013267	GLS2	-319
chr12	6372740	6373128	14	NM_001038	SCNN1A	-2805
chr12	6372740	6373128	14	NM_001159576	SCNN1A	-2290
chr12	6372740	6373128	14	NM_001159575	SCNN1A	-4423
chr12	6372740	6373128	14	NM_001270987	LTBR	-2433
chr12	89352428	89352865	14	NM_001946	DUSP6	-213
chr12	89352428	89352865	14	NM_022652	DUSP6	-213
chr14	49623908	49624313	14	NM_001001	RPL36AL	3425
chr14	49623908	49624313	14	NM_002408	MGAT2	3340
chr14	51333801	51334398	14	NR_038358	LINC00640	707
chr14	66503432	66503940	14	NM_001024218	GPHN	-3720
chr14	66503432	66503940	14	NM_020806	GPHN	-3720
chr14	73027170	73027654	14	NM_001281734	ZFYVE1	200
chr14	73027170	73027654	14	NM_021260	ZFYVE1	200
chr14	74953014	74953402	14	NM_001293643	PGF	-2556
chr14	74953014	74953402	14	NM_002632	PGF	-2556
chr14	74953014	74953402	14	NM_001207012	PGF	-2556
chr14	85532131	85532557	14	NM_013231	FLRT2	2201
chr15	31164187	31164540	14	NM_001252020	TRPM1	3090
chr15	43100856	43101447	14	NM_174916	UBR1	-4937
chr15	51738891	51739416	14	NM_153374	LYSMD2	1030
chr15	63038086	63038462	14	NM_000366	TPM1	-4364
chr15	63038086	63038462	14	NM_001018005	TPM1	-4364
chr15	63038086	63038462	14	NM_001018007	TPM1	-4364
chr15	63038086	63038462	14	NM_001018020	TPM1	-4364
chr15	63038086	63038462	14	NM_001018004	TPM1	-4364
chr15	63038086	63038462	14	NM_001018006	TPM1	-4364
chr15	63038086	63038462	14	NM_001301244	TPM1	-4364
chr15	73987921	73988410	14	NM_001256677	STOML1	-4183
chr15	73987921	73988410	14	NM_001256675	STOML1	-4183
chr15	73987921	73988410	14	NM_001256674	STOML1	-4183
chr15	73987921	73988410	14	NM_004809	STOML1	-4183
chr15	73987921	73988410	14	NM_001256673	STOML1	-4183
chr15	73987921	73988410	14	NM_001256672	STOML1	-4183
chr15	75723827	75724202	14	NM_175881	ODF3L1	37
chr16	19525044	19525597	14	NM_016641	GDE1	3192
chr16	19525044	19525597	14	NM_001199022	CCP110	1464
chr16	19525044	19525597	14	NM_014711	CCP110	1464
chr16	25026629	25026992	14	NR_038379	LOC554206	-4930
chr16	2915868	2916367	14	NM_020912	FLYWCH1	4139
[truncated: 9,104 more rows]

## Sheet: p63associatedGeneEnhancer
p63peak_Chromosome	p63peak_Start	p63peak_End	Number of supporting p63 ChIP-seq datasets	enhancer_Chromosome	enhancer_Start	enhancer_End	EnhancerID	Enhancer-associated Gene	Gene Symbol
chr1	200669441	200670347	20	chr1	200668229	200671704	GH01J200668	ENSG00000118197	DDX59
chr1	200669441	200670347	20	chr1	200668229	200671704	GH01J200668	ENSG00000260088	DDX59-AS1
chr1	205591795	205592393	20	chr1	205591432	205595438	GH01J205591	ENSG00000174514	MFSD4A
chr1	209815811	209816870	20	chr1	209814152	209818041	GH01J209814	ENSG00000117595	IRF6
chr1	214439360	214440038	20	chr1	214437640	214442556	GH01J214437	ENSG00000152104	PTPN14
chr1	23167389	23167912	20	chr1	23166075	23170599	GH01J023166	ENSG00000169641	LUZP1
chr1	40886634	40887465	20	chr1	40885928	40888357	GH01J040885	ENSG00000229528	AC119677.1
chr1	40886634	40887465	20	chr1	40885928	40888357	GH01J040885	ENSG00000179862	CITED4
chr1	42940918	42941444	20	chr1	42929869	42948855	GH01J042929	ENSG00000117394	SLC2A1
chr1	93592997	93593374	20	chr1	93590785	93597291	GH01J093590	ENSG00000137936	BCAR3
chr10	103871904	103872856	20	chr10	103869556	103873902	GH10J103869	ENSG00000107960	STN1
chr10	1054750	1055124	20	chr10	1054376	1058738	GH10J001054	ENSG00000047056	WDR37
chr10	11757455	11758431	20	chr10	11756555	11759420	GH10J011756	ENSG00000134463	ECHDC3
chr10	24382984	24384017	20	chr10	24381714	24386989	GH10J024381	ENSG00000120549	KIAA1217
chr10	70146617	70147413	20	chr10	70144883	70147981	GH10J070144	ENSG00000042286	AIFM2
chr10	70146617	70147413	20	chr10	70144883	70147981	GH10J070144	ENSG00000079332	SAR1A
chr10	72331608	72332324	20	chr10	72326601	72337892	GH10J072326	ENSG00000148719	DNAJB12
chr10	72331608	72332324	20	chr10	72326601	72337892	GH10J072326	ENSG00000213551	DNAJC9
chr10	73888707	73889383	20	chr10	73886001	73896016	GH10J073886	ENSG00000148660	CAMK2G
chr10	73888707	73889383	20	chr10	73886001	73896016	GH10J073886	ENSG00000166507	NDST2
chr10	77898301	77899350	20	chr10	77897751	77900017	GH10J077897	ENSG00000151208	DLG5
chr10	86968179	86968789	20	chr10	86965953	86973708	GH10J086965	ENSG00000272734	ADIRF-AS1
chr11	102256218	102256687	20	chr11	102255550	102257464	GH11J102255	ENSG00000254422	AP000942.2
chr11	118622983	118623812	20	chr11	118614769	118623969	GH11J118614	ENSG00000118096	IFT46
chr11	118622983	118623812	20	chr11	118614769	118623969	GH11J118614	ENSG00000118058	KMT2A
chr11	118622983	118623812	20	chr11	118614769	118623969	GH11J118614	ENSG00000019144	PHLDB1
chr11	118622983	118623812	20	chr11	118614769	118623969	GH11J118614	ENSG00000118094	TREH
chr11	12189437	12190156	20	chr11	12155761	12191174	GH11J012155	ENSG00000133816	MICAL2
chr11	35115419	35116060	20	chr11	35114859	35118107	GH11J035114	ENSG00000255521	AL356215.1
chr11	35115419	35116060	20	chr11	35114859	35118107	GH11J035114	ENSG00000026508	CD44
chr11	534367	535154	20	chr11	534160	538417	GH11J000534	ENSG00000174775	HRAS
chr11	57292908	57293652	20	chr11	57291998	57296879	GH11J057291	ENSG00000149136	SSRP1
chr11	57292908	57293652	20	chr11	57291998	57296879	GH11J057291	ENSG00000149115	TNKS1BP1
chr11	63985940	63986639	20	chr11	63985437	63987785	GH11J063985	ENSG00000167770	OTUB1
chr11	65381826	65382576	20	chr11	65377322	65387640	GH11J065377	ENSG00000126391	FRMD8
chr11	65381826	65382576	20	chr11	65377322	65387640	GH11J065377	ENSG00000245532	NEAT1
chr11	65381826	65382576	20	chr11	65377322	65387640	GH11J065377	ENSG00000168066	SF1
chr11	65420953	65421741	20	chr11	65414758	65433603	GH11J065414	ENSG00000149806	FAU
chr11	65420953	65421741	20	chr11	65414758	65433603	GH11J065414	ENSG00000126391	FRMD8
chr11	65420953	65421741	20	chr11	65414758	65433603	GH11J065414	ENSG00000172977	KAT5
chr11	65420953	65421741	20	chr11	65414758	65433603	GH11J065414	ENSG00000173327	MAP3K11
chr11	65420953	65421741	20	chr11	65414758	65433603	GH11J065414	ENSG00000245532	NEAT1
chr11	65420953	65421741	20	chr11	65414758	65433603	GH11J065414	ENSG00000173039	RELA
chr11	65420953	65421741	20	chr11	65414758	65433603	GH11J065414	ENSG00000168066	SF1
chr11	74942758	74943668	20	chr11	74941970	74944438	GH11J074941	ENSG00000166435	XRRA1
chr12	120264262	120265116	20	chr12	120261350	120266507	GH12J120261	ENSG00000089159	PXN
chr12	122946492	122947248	20	chr12	122942132	122948290	GH12J122942	ENSG00000139722	VPS37B
chr12	123519098	123519832	20	chr12	123518367	123521228	GH12J123518	ENSG00000188026	RILPL1
chr12	47863327	47864034	20	chr12	47863001	47864561	GH12J047863	ENSG00000061273	HDAC7
chr12	47863327	47864034	20	chr12	47863001	47864561	GH12J047863	ENSG00000111424	VDR
chr12	50642770	50643380	20	chr12	50641278	50643646	GH12J050641	ENSG00000066084	DIP2B
chr12	68808639	68809264	20	chr12	68803183	68810219	GH12J068803	ENSG00000256678	AC025423.3
chr12	68808639	68809264	20	chr12	68803183	68810219	GH12J068803	ENSG00000111605	CPSF6
chr12	68808639	68809264	20	chr12	68803183	68810219	GH12J068803	ENSG00000135679	MDM2
chr12	68808639	68809264	20	chr12	68803183	68810219	GH12J068803	ENSG00000111581	NUP107
chr12	68808639	68809264	20	chr12	68803183	68810219	GH12J068803	ENSG00000127314	RAP1B
chr13	49082549	49083211	20	chr13	49081993	49083971	GH13J049081	ENSG00000102531	FNDC3A
chr14	22979032	22979764	20	chr14	22976100	22983710	GH14J022976	ENSG00000129474	AJUBA
chr14	22979032	22979764	20	chr14	22976100	22983710	GH14J022976	ENSG00000258457	AL132780.2
chr14	22979032	22979764	20	chr14	22976100	22983710	GH14J022976	ENSG00000100802	C14orf93
chr14	22979032	22979764	20	chr14	22976100	22983710	GH14J022976	ENSG00000139880	CDH24
chr14	22979032	22979764	20	chr14	22976100	22983710	GH14J022976	ENSG00000092036	HAUS4
chr14	22979032	22979764	20	chr14	22976100	22983710	GH14J022976	ENSG00000215271	HOMEZ
chr14	22979032	22979764	20	chr14	22976100	22983710	GH14J022976	ENSG00000100462	PRMT5
chr14	22979032	22979764	20	chr14	22976100	22983710	GH14J022976	ENSG00000100804	PSMB5
chr14	22979032	22979764	20	chr14	22976100	22983710	GH14J022976	ENSG00000100461	RBM23
chr14	50060945	50061839	20	chr14	50059582	50066522	GH14J050059	ENSG00000214900	LINC01588
chr14	50060945	50061839	20	chr14	50059582	50066522	GH14J050059	ENSG00000100483	VCPKMT
chr15	59165393	59166320	20	chr15	59164748	59167565	GH15J059164	ENSG00000157483	MYO1E
chr15	90212141	90213041	20	chr15	90209527	90215444	GH15J090209	ENSG00000185033	SEMA4B
chr16	75305200	75306200	20	chr16	75303503	75311446	GH16J075303	ENSG00000050820	BCAR1
chr16	75305200	75306200	20	chr16	75303503	75311446	GH16J075303	ENSG00000153774	CFDP1
chr16	75305200	75306200	20	chr16	75303503	75311446	GH16J075303	ENSG00000252101	RNU6-758P
chr16	75485776	75486550	20	chr16	75482832	75487449	GH16J075482	ENSG00000050820	BCAR1
chr16	81526906	81527296	20	chr16	81516991	81534260	GH16J081517	ENSG00000153815	CMIP
chr16	81531136	81532010	20	chr16	81516991	81534260	GH16J081517	ENSG00000153815	CMIP
chr16	81580929	81581633	20	chr16	81579963	81585168	GH16J081579	ENSG00000153815	CMIP
chr16	84501164	84501841	20	chr16	84498741	84507144	GH16J084498	ENSG00000140950	MEAK7
chr16	87789701	87790570	20	chr16	87787715	87792567	GH16J087787	ENSG00000174990	CA5A
chr16	87789701	87790570	20	chr16	87787715	87792567	GH16J087787	ENSG00000103264	FBXO31
chr17	35784519	35785410	20	chr17	35783026	35789942	GH17J035783	ENSG00000271447	MMP28
chr17	35784519	35785410	20	chr17	35783026	35789942	GH17J035783	ENSG00000270647	TAF15
chr17	4854112	4854904	20	chr17	4851999	4855270	GH17J004852	ENSG00000141503	MINK1
chr17	50539873	50540576	20	chr17	50539619	50544514	GH17J050539	ENSG00000250286	AC021491.2
chr17	50539873	50540576	20	chr17	50539619	50544514	GH17J050539	ENSG00000049283	EPN3
chr17	50539873	50540576	20	chr17	50539619	50544514	GH17J050539	ENSG00000006282	SPATA20
chr17	50954014	50954804	20	chr17	50953488	50956529	GH17J050953	ENSG00000243678	NME2
chr17	57901238	57901874	20	chr17	57897796	57905999	GH17J057897	ENSG00000180891	CUEDC1
chr17	57901238	57901874	20	chr17	57897796	57905999	GH17J057897	ENSG00000136450	SRSF1
chr17	61411887	61412730	20	chr17	61393416	61417549	GH17J061393	ENSG00000187013	LINC02875
chr17	61411887	61412730	20	chr17	61393416	61417549	GH17J061393	ENSG00000267280	TBX2-AS1
chr17	7354091	7354818	20	chr17	7347305	7356331	GH17J007347	ENSG00000072818	ACAP1
chr18	63476523	63477089	20	chr18	63475393	63482667	GH18J063475	ENSG00000206075	SERPINB5
chr19	14525571	14526379	20	chr19	14525247	14531134	GH19J014525	ENSG00000132002	DNAJB1
chr19	14525571	14526379	20	chr19	14525247	14531134	GH19J014525	ENSG00000099797	TECR
chr19	19776295	19776978	20	chr19	19774619	19777801	GH19J019774	ENSG00000266904	LINC00663
chr19	19776295	19776978	20	chr19	19774619	19777801	GH19J019774	ENSG00000267419	ZNF56
chr19	2088980	2089699	20	chr19	2079413	2098291	GH19J002079	ENSG00000133243	BTBD2
chr19	2088980	2089699	20	chr19	2079413	2098291	GH19J002079	ENSG00000104885	DOT1L
chr19	2088980	2089699	20	chr19	2079413	2098291	GH19J002079	ENSG00000099840	IZUMO4
chr19	2088980	2089699	20	chr19	2079413	2098291	GH19J002079	ENSG00000099875	MKNK2
chr19	2088980	2089699	20	chr19	2079413	2098291	GH19J002079	ENSG00000172081	MOB3A
chr19	3154781	3155460	20	chr19	3150383	3156392	GH19J003150	ENSG00000088256	GNA11
chr19	33298362	33298920	20	chr19	33296106	33306704	GH19J033296	ENSG00000245848	CEBPA
chr19	33298362	33298920	20	chr19	33296106	33306704	GH19J033296	ENSG00000267296	CEBPA-DT
chr19	37979608	37980359	20	chr19	37973558	37983573	GH19J037973	ENSG00000099338	CATSPERG
chr19	37979608	37980359	20	chr19	37973558	37983573	GH19J037973	ENSG00000105738	SIPA1L3
chr19	37979608	37980359	20	chr19	37973558	37983573	GH19J037973	ENSG00000171804	WDR87
chr19	37979608	37980359	20	chr19	37973558	37983573	GH19J037973	ENSG00000245680	ZNF585B
chr19	37979608	37980359	20	chr19	37973558	37983573	GH19J037973	ENSG00000198182	ZNF607
chr19	38698825	38699485	20	chr19	38673895	38715876	GH19J038673	ENSG00000267375	AC008649.2
chr19	38698825	38699485	20	chr19	38673895	38715876	GH19J038673	ENSG00000130402	ACTN4
chr19	38698825	38699485	20	chr19	38673895	38715876	GH19J038673	ENSG00000099338	CATSPERG
chr19	38698825	38699485	20	chr19	38673895	38715876	GH19J038673	ENSG00000161243	FBXO27
chr19	38698825	38699485	20	chr19	38673895	38715876	GH19J038673	ENSG00000104824	HNRNPL
chr19	38698825	38699485	20	chr19	38673895	38715876	GH19J038673	ENSG00000178934	LGALS7B
chr19	38698825	38699485	20	chr19	38673895	38715876	GH19J038673	ENSG00000130669	PAK4
chr19	41218359	41219222	20	chr19	41217850	41228295	GH19J041217	ENSG00000269652	AC011510.1
chr19	41218359	41219222	20	chr19	41217850	41228295	GH19J041217	ENSG00000167601	AXL
chr19	45400156	45400656	20	chr19	45400362	45400512	GH19J045400	ENSG00000117877	CD3EAP
chr19	46762200	46762912	20	chr19	46759250	46763078	GH19J046759	ENSG00000105281	SLC1A5
chr19	47725656	47726493	20	chr19	47725512	47727300	GH19J047726	ENSG00000105373	NOP53
chr19	49765952	49766602	20	chr19	49764800	49768725	GH19J049764	ENSG00000196961	AP2A1
chr2	112692447	112693249	20	chr2	112690537	112693917	GH02J112690	ENSG00000237753	AC079922.2
chr2	112814120	112814839	20	chr2	112811141	112815468	GH02J112811	ENSG00000125538	IL1B
chr2	112814120	112814839	20	chr2	112811141	112815468	GH02J112811	ENSG00000136696	IL36B
chr2	128305043	128306362	20	chr2	128299221	128311686	GH02J128299	ENSG00000136720	HS6ST1
chr2	173124237	173124992	20	chr2	173123903	173125072	GH02J173123	ENSG00000091436	MAP3K20
chr2	177169797	177170749	20	chr2	177164172	177173131	GH02J177164	ENSG00000116044	NFE2L2
chr2	25278937	25279555	20	chr2	25272583	25281271	GH02J025272	ENSG00000221445	MIR1301
chr2	28565746	28566603	20	chr2	28565551	28567600	GH02J028565	ENSG00000230730	AC074011.1
chr2	28565746	28566603	20	chr2	28565551	28567600	GH02J028565	ENSG00000163803	PLB1
chr2	28565746	28566603	20	chr2	28565551	28567600	GH02J028565	ENSG00000242915	SNRPGP7
chr2	60354592	60355161	20	chr2	60348522	60357637	GH02J060348	ENSG00000228590	AC007381.1
chr2	74188148	74188711	20	chr2	74184001	74188837	GH02J074184	ENSG00000217702	AC073263.1
chr2	74188148	74188711	20	chr2	74184001	74188837	GH02J074184	ENSG00000225439	BOLA3-AS1
chr2	74188148	74188711	20	chr2	74184001	74188837	GH02J074184	ENSG00000114978	MOB1A
chr20	35411612	35412350	20	chr20	35410754	35412814	GH20J035410	ENSG00000100991	TRPC4AP
chr20	35411612	35412350	20	chr20	35410754	35412814	GH20J035410	ENSG00000101019	UQCC1
chr20	50844369	50845255	20	chr20	50843089	50846404	GH20J050843	ENSG00000124243	BCAS4
chr20	62349883	62350703	20	chr20	62349810	62351791	GH20J062350	ENSG00000130702	LAMA5
chr21	33975990	33976479	20	chr21	33974898	33978334	GH21J033975	ENSG00000237945	LINC00649
chr22	31177370	31177891	20	chr22	31176270	31179998	GH22J031176	ENSG00000138942	RNF185
chr22	31253833	31254525	20	chr22	31247005	31255522	GH22J031247	ENSG00000182541	LIMK2
chr22	36329191	36330001	20	chr22	36321325	36345840	GH22J036321	ENSG00000100360	IFT27
chr22	40541270	40541693	20	chr22	40540194	40543076	GH22J040540	ENSG00000196588	MRTFA
chr22	40627551	40628106	20	chr22	40627431	40629294	GH22J040627	ENSG00000196588	MRTFA
chr22	42749095	42749837	20	chr22	42747416	42749849	GH22J042747	ENSG00000128274	A4GALT
chr3	12759142	12759927	20	chr3	12757486	12761316	GH03J012757	ENSG00000088726	TMEM40
chr3	159829467	159830033	20	chr3	159828448	159831272	GH03J159828	ENSG00000168811	IL12A
chr3	159881622	159882359	20	chr3	159880966	159885200	GH03J159880	ENSG00000168811	IL12A
chr3	177447946	177448347	20	chr3	177441234	177453516	GH03J177441	ENSG00000228221	LINC00578
chr3	184740875	184741657	20	chr3	184737280	184742200	GH03J184737	ENSG00000272970	AC107294.2
chr3	190037848	190038454	20	chr3	190036379	190038916	GH03J190036	ENSG00000090530	P3H2
chr3	37945895	37946617	20	chr3	37941728	37947465	GH03J037941	ENSG00000144677	CTDSPL
chr3	48402200	48402895	20	chr3	48401617	48403322	GH03J048401	ENSG00000164053	ATRIP
chr3	48402200	48402895	20	chr3	48401617	48403322	GH03J048401	ENSG00000164054	SHISA5
chr3	48432306	48433062	20	chr3	48424573	48436680	GH03J048424	ENSG00000164054	SHISA5
chr3	48432306	48433062	20	chr3	48424573	48436680	GH03J048424	ENSG00000232112	TMA7
chr3	48598777	48599653	20	chr3	48593561	48601110	GH03J048593	ENSG00000178252	WDR6
chr3	4994860	4995473	20	chr3	4993073	4997383	GH03J004993	ENSG00000134109	EDEM1
chr3	50157727	50158385	20	chr3	50154447	50173170	GH03J050154	ENSG00000114353	GNAI2
chr3	50157727	50158385	20	chr3	50154447	50173170	GH03J050154	ENSG00000114738	MAPKAPK3
chr3	50157727	50158385	20	chr3	50154447	50173170	GH03J050154	ENSG00000003756	RBM5
chr3	50157727	50158385	20	chr3	50154447	50173170	GH03J050154	ENSG00000004534	RBM6
chr3	50157727	50158385	20	chr3	50154447	50173170	GH03J050154	ENSG00000001617	SEMA3F
chr3	53269839	53270501	20	chr3	53268601	53272151	GH03J053268	ENSG00000163932	PRKCD
chr3	53269839	53270501	20	chr3	53268601	53272151	GH03J053268	ENSG00000163931	TKT
chr4	10021314	10021745	20	chr4	10018416	10023420	GH04J010018	ENSG00000109667	SLC2A9
chr4	122798095	122798588	20	chr4	122795893	122800409	GH04J122795	ENSG00000138685	FGF2
chr4	76781722	76782408	20	chr4	76779896	76784450	GH04J076779	ENSG00000233860	AC107072.2
chr5	141514109	141514795	20	chr5	141506468	141526487	GH05J141506	ENSG00000131504	DIAPH1
chr5	141514109	141514795	20	chr5	141506468	141526487	GH05J141506	ENSG00000246422	DIAPH1-AS1
chr5	141514109	141514795	20	chr5	141506468	141526487	GH05J141506	ENSG00000253846	PCDHGA10
chr5	141514109	141514795	20	chr5	141506468	141526487	GH05J141506	ENSG00000253873	PCDHGA11
chr5	141514109	141514795	20	chr5	141506468	141526487	GH05J141506	ENSG00000253159	PCDHGA12
chr5	141514109	141514795	20	chr5	141506468	141526487	GH05J141506	ENSG00000081853	PCDHGA2
chr5	141514109	141514795	20	chr5	141506468	141526487	GH05J141506	ENSG00000254245	PCDHGA3
chr5	141514109	141514795	20	chr5	141506468	141526487	GH05J141506	ENSG00000253731	PCDHGA6
chr5	141514109	141514795	20	chr5	141506468	141526487	GH05J141506	ENSG00000253537	PCDHGA7
chr5	141514109	141514795	20	chr5	141506468	141526487	GH05J141506	ENSG00000254221	PCDHGB1
chr5	141514109	141514795	20	chr5	141506468	141526487	GH05J141506	ENSG00000253953	PCDHGB4
chr5	141514109	141514795	20	chr5	141506468	141526487	GH05J141506	ENSG00000253305	PCDHGB6
chr5	141514109	141514795	20	chr5	141506468	141526487	GH05J141506	ENSG00000254122	PCDHGB7
chr5	141514109	141514795	20	chr5	141506468	141526487	GH05J141506	ENSG00000240184	PCDHGC3
chr5	141514109	141514795	20	chr5	141506468	141526487	GH05J141506	ENSG00000242419	PCDHGC4
chr5	141514109	141514795	20	chr5	141506468	141526487	GH05J141506	ENSG00000240764	PCDHGC5
chr5	151615262	151615899	20	chr5	151612489	151621806	GH05J151612	ENSG00000145907	G3BP1
chr5	57494628	57495131	20	chr5	57492845	57496148	GH05J057492	ENSG00000250961	AC025470.2
chr6	138034958	138035489	20	chr6	138029954	138036995	GH06J138029	ENSG00000112378	PERP
chr6	158049386	158050274	20	chr6	158048137	158051716	GH06J158048	ENSG00000271040	AL390955.2
chr6	158049386	158050274	20	chr6	158048137	158051716	GH06J158048	ENSG00000078269	SYNJ2
chr6	17865068	17865960	20	chr6	17863078	17870062	GH06J017863	ENSG00000137177	KIF13A
chr6	35485933	35486698	20	chr6	35483527	35501594	GH06J035483	ENSG00000064995	TAF11
chr6	35485933	35486698	20	chr6	35483527	35501594	GH06J035483	ENSG00000007866	TEAD3
chr6	35485933	35486698	20	chr6	35483527	35501594	GH06J035483	ENSG00000112041	TULP1
chr6	37083246	37083811	20	chr6	37082433	37085199	GH06J037082	ENSG00000146192	FGD2
chr6	37083246	37083811	20	chr6	37082433	37085199	GH06J037082	ENSG00000137193	PIM1
chr6	37083246	37083811	20	chr6	37082433	37085199	GH06J037082	ENSG00000112081	SRSF3
chr6	43088711	43089268	20	chr6	43087569	43094831	GH06J043087	ENSG00000124587	PEX6
chr6	43088711	43089268	20	chr6	43087569	43094831	GH06J043087	ENSG00000112655	PTK7
chr7	128962293	128963223	20	chr7	128960902	128964220	GH07J128960	ENSG00000128604	IRF5
chr7	128962293	128963223	20	chr7	128960902	128964220	GH07J128960	ENSG00000064419	TNPO3
chr7	131188240	131188898	20	chr7	131185902	131191671	GH07J131185	ENSG00000128585	MKLN1
chr7	44307957	44308581	20	chr7	44307116	44308432	GH07J044307	ENSG00000058404	CAMK2B
chr7	44307957	44308581	20	chr7	44307116	44308432	GH07J044307	ENSG00000122678	POLM
chr7	47557734	47558673	20	chr7	47555392	47563826	GH07J047555	ENSG00000136205	TNS3
chr7	5525923	5526634	20	chr7	5523929	5535065	GH07J005523	ENSG00000075624	ACTB
chr7	5525923	5526634	20	chr7	5523929	5535065	GH07J005523	ENSG00000146587	RBAK
chr8	127401135	127401727	20	chr8	127396733	127403818	GH08J127396	ENSG00000246228	CASC8
chr9	116686809	116687702	20	chr9	116686214	116690811	GH09J116686	ENSG00000148219	ASTN2
chr9	124818075	124819034	20	chr9	124817737	124819676	GH09J124817	ENSG00000136918	WDR38
chr9	131633199	131634012	20	chr9	131632374	131637517	GH09J131632	ENSG00000107263	RAPGEF1
chr9	38024080	38024720	20	chr9	38021751	38029289	GH09J038021	ENSG00000255872	AL138752.2
chr9	38024080	38024720	20	chr9	38021751	38029289	GH09J038021	ENSG00000107338	SHB
chr9	38024080	38024720	20	chr9	38021751	38029289	GH09J038021	ENSG00000122696	SLC25A51
chr9	90942475	90943444	20	chr9	90942218	90943731	GH09J090942	ENSG00000228216	AL355607.1
chr9	92147101	92147848	20	chr9	92145625	92149154	GH09J092145	ENSG00000225511	LINC00475
chr1	109197480	109198575	19	chr1	109196528	109199306	GH01J109196	ENSG00000116299	KIAA1324
chr1	115655062	115655838	19	chr1	115654531	115656021	GH01J115654	ENSG00000173218	VANGL1
chr1	115771642	115772298	19	chr1	115771130	115772609	GH01J115771	ENSG00000118729	CASQ2
chr1	12618162	12618904	19	chr1	12614002	12620773	GH01J012614	ENSG00000048707	VPS13D
chr1	1421146	1421764	19	chr1	1420676	1423691	GH01J001420	ENSG00000235098	ANKRD65
chr1	1421146	1421764	19	chr1	1420676	1423691	GH01J001420	ENSG00000160072	ATAD3B
chr1	14733021	14733578	19	chr1	14731544	14734361	GH01J014731	ENSG00000189337	KAZN
chr1	152167633	152168266	19	chr1	152166892	152168626	GH01J152166	ENSG00000237975	FLG-AS1
chr1	15799050	15799465	19	chr1	15791869	15803135	GH01J015791	ENSG00000178715	AL450998.1
chr1	15799050	15799465	19	chr1	15791869	15803135	GH01J015791	ENSG00000186510	CLCNKA
chr1	15799050	15799465	19	chr1	15791869	15803135	GH01J015791	ENSG00000173641	HSPB7
chr1	16184425	16185097	19	chr1	16171445	16185389	GH01J016171	ENSG00000142632	ARHGEF19
chr1	16184425	16185097	19	chr1	16171445	16185389	GH01J016171	ENSG00000228549	BX284668.2
chr1	16184425	16185097	19	chr1	16171445	16185389	GH01J016171	ENSG00000142627	EPHA2
chr1	167662927	167663649	19	chr1	167660571	167667371	GH01J167660	ENSG00000198771	RCSD1
chr1	17215224	17216017	19	chr1	17215137	17215656	GH01J017215	ENSG00000142619	PADI3
chr1	174818818	174819542	19	chr1	174818494	174819692	GH01J174818	ENSG00000152061	RABGAP1L
chr1	181159205	181160116	19	chr1	181159011	181162174	GH01J181159	ENSG00000153029	MR1
chr1	201311513	201312185	19	chr1	201305867	201313359	GH01J201305	ENSG00000159166	LAD1
chr1	201311513	201312185	19	chr1	201305867	201313359	GH01J201305	ENSG00000081277	PKP1
chr1	202056576	202057193	19	chr1	202055603	202059484	GH01J202055	ENSG00000234678	ELF3-AS1
chr1	202236802	202237795	19	chr1	202233325	202237129	GH01J202233	ENSG00000133067	LGR6
chr1	207240669	207241310	19	chr1	207239799	207244925	GH01J207239	ENSG00000196352	CD55
chr1	209370366	209371233	19	chr1	209366484	209371604	GH01J209366	ENSG00000231648	LINC01698
chr1	209370366	209371233	19	chr1	209366484	209371604	GH01J209366	ENSG00000230937	MIR205HG
chr1	224503442	224504237	19	chr1	224501847	224504857	GH01J224501	ENSG00000143786	CNIH3
chr1	224503442	224504237	19	chr1	224501847	224504857	GH01J224501	ENSG00000162923	WDR26
chr1	27342638	27343456	19	chr1	27339748	27344199	GH01J027339	ENSG00000142765	SYTL1
chr1	34755013	34755872	19	chr1	34753637	34756470	GH01J034754	ENSG00000189280	GJB5
chr1	3690229	3690866	19	chr1	3687984	3691697	GH01J003687	ENSG00000078900	TP73
chr1	46183112	46183599	19	chr1	46178987	46185981	GH01J046178	ENSG00000171357	LURAP1
chr1	58572484	58573221	19	chr1	58572299	58578798	GH01J058572	ENSG00000162600	OMA1
chr1	58572484	58573221	19	chr1	58572299	58578798	GH01J058572	ENSG00000184292	TACSTD2
chr1	6488665	6489492	19	chr1	6487570	6493544	GH01J006487	ENSG00000171680	PLEKHG5
chr1	6488665	6489492	19	chr1	6487570	6493544	GH01J006487	ENSG00000041988	THAP3
chr1	6488665	6489492	19	chr1	6487570	6493544	GH01J006487	ENSG00000215788	TNFRSF25
chr1	67348145	67348702	19	chr1	67347499	67348882	GH01J067347	ENSG00000081985	IL12RB2
chr1	8004726	8005169	19	chr1	8002829	8007092	GH01J008002	ENSG00000238290	AL034417.3
chr1	8004726	8005169	19	chr1	8002829	8007092	GH01J008002	ENSG00000116285	ERRFI1
chr1	8004726	8005169	19	chr1	8002829	8007092	GH01J008002	ENSG00000116288	PARK7
chr10	100043396	100044106	19	chr10	100043119	100045329	GH10J100043	ENSG00000107554	DNMBP
chr10	1059832	1060324	19	chr10	1060156	1065619	GH10J001060	ENSG00000047056	WDR37
chr10	119680590	119681109	19	chr10	119677922	119683217	GH10J119677	ENSG00000151929	BAG3
chr10	119680590	119681109	19	chr10	119677922	119683217	GH10J119677	ENSG00000232823	TXNP1
chr10	128063715	128064311	19	chr10	128061762	128066538	GH10J128061	ENSG00000132334	PTPRE
chr10	14648714	14649397	19	chr10	14647073	14650208	GH10J014647	ENSG00000065809	FAM107B
chr10	24256008	24256766	19	chr10	24253998	24260412	GH10J024253	ENSG00000120549	KIAA1217
chr10	3107421	3108123	19	chr10	3106782	3108903	GH10J003106	ENSG00000067057	PFKP
chr10	47406033	47406827	19	chr10	47401096	47409475	GH10J047401	ENSG00000204172	AGAP9
chr10	89644821	89645747	19	chr10	89641863	89647579	GH10J089641	ENSG00000235100	AL157400.3
chr10	89644821	89645747	19	chr10	89641863	89647579	GH10J089641	ENSG00000240996	AL157400.4
chr10	89644821	89645747	19	chr10	89641863	89647579	GH10J089641	ENSG00000138182	KIF20B
chr10	89644821	89645747	19	chr10	89641863	89647579	GH10J089641	ENSG00000152782	PANK1
chr10	97549889	97550694	19	chr10	97548903	97551133	GH10J097548	ENSG00000165887	ANKRD2
chr10	97549889	97550694	19	chr10	97548903	97551133	GH10J097548	ENSG00000165886	UBTD1
chr11	10899176	10900357	19	chr11	10897924	10903244	GH11J010897	ENSG00000250041	AC069360.1
chr11	10899176	10900357	19	chr11	10897924	10903244	GH11J010897	ENSG00000110321	EIF4G2
chr11	10899176	10900357	19	chr11	10897924	10903244	GH11J010897	ENSG00000236287	ZBED5
chr11	10899176	10900357	19	chr11	10897924	10903244	GH11J010897	ENSG00000247271	ZBED5-AS1
chr11	113384540	113385015	19	chr11	113383782	113386126	GH11J113383	ENSG00000149292	TTC12
chr11	119691795	119692573	19	chr11	119690164	119702813	GH11J119690	ENSG00000110400	NECTIN1
chr11	120135707	120136451	19	chr11	120131408	120139160	GH11J120131	ENSG00000137699	TRIM29
chr11	12065881	12066523	19	chr11	12065215	12068628	GH11J012066	ENSG00000254991	AC124276.1
chr11	1307177	1307620	19	chr11	1301487	1312143	GH11J001301	ENSG00000174672	BRSK2
chr11	1307177	1307620	19	chr11	1301487	1312143	GH11J001301	ENSG00000078902	TOLLIP
chr11	1307177	1307620	19	chr11	1301487	1312143	GH11J001301	ENSG00000255153	TOLLIP-AS1
chr11	27228185	27228696	19	chr11	27227631	27230787	GH11J027227	ENSG00000254560	BBOX1-AS1
chr11	35567600	35568397	19	chr11	35566995	35568877	GH11J035566	ENSG00000149090	PAMR1
chr11	57788270	57788939	19	chr11	57773945	57789936	GH11J057774	ENSG00000254732	AP001931.1
chr11	57788270	57788939	19	chr11	57773945	57789936	GH11J057774	ENSG00000198561	CTNND1
chr11	57788270	57788939	19	chr11	57773945	57789936	GH11J057774	ENSG00000211450	SELENOH
chr11	57788270	57788939	19	chr11	57773945	57789936	GH11J057774	ENSG00000166793	YPEL4
chr11	61369536	61370310	19	chr11	61365686	61371384	GH11J061365	ENSG00000187049	TMEM216
chr11	62599745	62600406	19	chr11	62597510	62603729	GH11J062597	ENSG00000149499	EML3
chr11	62599745	62600406	19	chr11	62597510	62603729	GH11J062597	ENSG00000089597	GANAB
chr11	62599745	62600406	19	chr11	62597510	62603729	GH11J062597	ENSG00000149480	MTA2
chr11	62599745	62600406	19	chr11	62597510	62603729	GH11J062597	ENSG00000149016	TUT1
chr11	64842142	64843571	19	chr11	64841545	64845844	GH11J064841	ENSG00000133895	MEN1
chr11	65592596	65593470	19	chr11	65583512	65594645	GH11J065583	ENSG00000173442	EHBP1L1
chr11	65592596	65593470	19	chr11	65583512	65594645	GH11J065583	ENSG00000173327	MAP3K11
chr11	70063452	70064134	19	chr11	70063133	70066114	GH11J070063	ENSG00000248844	LINC02753
chr11	74135223	74135698	19	chr11	74133137	74143376	GH11J074133	ENSG00000168014	C2CD3
chr11	74135223	74135698	19	chr11	74133137	74143376	GH11J074133	ENSG00000175564	UCP3
chr11	76824690	76825610	19	chr11	76823241	76826338	GH11J076823	ENSG00000078124	ACER3
chr11	803925	804847	19	chr11	803369	806602	GH11J000803	ENSG00000177595	PIDD1
chr11	803925	804847	19	chr11	803369	806602	GH11J000803	ENSG00000177600	RPLP2
chr11	94706201	94707472	19	chr11	94705246	94708039	GH11J094705	ENSG00000166025	AMOTL1
chr11	96243234	96243652	19	chr11	96241147	96244732	GH11J096241	ENSG00000077458	FAM76B
chr11	96243234	96243652	19	chr11	96241147	96244732	GH11J096241	ENSG00000184384	MAML2
chr12	10716607	10717711	19	chr12	10715681	10724506	GH12J010715	ENSG00000111196	MAGOHB
chr12	10716607	10717711	19	chr12	10715681	10724506	GH12J010715	ENSG00000060140	STYK1
chr12	121184311	121184836	19	chr12	121184295	121184989	GH12J121184	ENSG00000135124	P2RX4
chr12	121184311	121184836	19	chr12	121184295	121184989	GH12J121184	ENSG00000089041	P2RX7
chr12	122096602	122097147	19	chr12	122085902	122101398	GH12J122085	ENSG00000158113	LRRC43
chr12	122096602	122097147	19	chr12	122085902	122101398	GH12J122085	ENSG00000175727	MLXIP
chr12	38904762	38905473	19	chr12	38903126	38907623	GH12J038903	ENSG00000257718	CPNE8-AS1
chr12	40158766	40159283	19	chr12	40158118	40159568	GH12J040158	ENSG00000223914	LINC02471
chr12	57095897	57096673	19	chr12	57085002	57099131	GH12J057085	ENSG00000166888	STAT6
chr12	57521959	57522583	19	chr12	57516680	57525496	GH12J057516	ENSG00000166987	MBD6
chr12	6735593	6736207	19	chr12	6735274	6736420	GH12J006735	ENSG00000111652	COPS7A
chr13	113837109	113838399	19	chr13	113835463	113841636	GH13J113835	ENSG00000183087	GAS6
chr13	113837109	113838399	19	chr13	113835463	113841636	GH13J113835	ENSG00000233695	GAS6-AS1
chr13	45367378	45367878	19	chr13	45366780	45369487	GH13J045366	ENSG00000170919	TPT1-AS1
chr13	50731277	50731826	19	chr13	50730571	50733113	GH13J050730	ENSG00000186047	DLEU7
chr13	50731277	50731826	19	chr13	50730571	50733113	GH13J050730	ENSG00000237152	DLEU7-AS1
chr14	22839016	22839775	19	chr14	22835111	22840508	GH14J022835	ENSG00000157227	MMP14
chr14	22839016	22839775	19	chr14	22835111	22840508	GH14J022835	ENSG00000172590	MRPL52
chr14	49950731	49951284	19	chr14	49949944	49952683	GH14J049949	ENSG00000214900	LINC01588
chr14	51488599	51489288	19	chr14	51487740	51492314	GH14J051487	ENSG00000252400	RNU6-1291P
chr14	64680042	64680724	19	chr14	64679557	64684760	GH14J064679	ENSG00000126822	PLEKHG3
chr14	89428632	89429192	19	chr14	89425213	89432761	GH14J089425	ENSG00000053254	FOXN3
chr14	89428632	89429192	19	chr14	89425213	89432761	GH14J089425	ENSG00000258920	FOXN3-AS1
chr14	96267404	96267853	19	chr14	96264887	96270166	GH14J096264	ENSG00000258793	AL355102.4
chr14	96267404	96267853	19	chr14	96264887	96270166	GH14J096264	ENSG00000100739	BDKRB1
chr15	41804196	41804859	19	chr15	41800769	41807751	GH15J041800	ENSG00000243789	JMJD7
chr15	41804196	41804859	19	chr15	41800769	41807751	GH15J041800	ENSG00000137802	MAPKBP1
chr15	45162459	45163369	19	chr15	45161994	45163792	GH15J045161	ENSG00000259539	AC051619.5
chr15	45162459	45163369	19	chr15	45161994	45163792	GH15J045161	ENSG00000137857	DUOX1
chr15	45162459	45163369	19	chr15	45161994	45163792	GH15J045161	ENSG00000140254	DUOXA1
chr15	63385762	63386274	19	chr15	63385015	63386670	GH15J063385	ENSG00000074410	CA12
chr15	67147025	67147414	19	chr15	67129742	67152699	GH15J067129	ENSG00000166949	SMAD3
chr15	68271816	68272469	19	chr15	68270533	68274800	GH15J068270	ENSG00000260657	AC107871.2
chr15	68271816	68272469	19	chr15	68270533	68274800	GH15J068270	ENSG00000128973	CLN6
chr15	74799497	74800404	19	chr15	74775179	74801166	GH15J074775	ENSG00000179335	CLK3
chr15	74799497	74800404	19	chr15	74775179	74801166	GH15J074775	ENSG00000213578	CPLX3
chr15	74799497	74800404	19	chr15	74775179	74801166	GH15J074775	ENSG00000103653	CSK
chr15	74799497	74800404	19	chr15	74775179	74801166	GH15J074775	ENSG00000140506	LMAN1L
chr15	74799497	74800404	19	chr15	74775179	74801166	GH15J074775	ENSG00000140474	ULK3
chr15	75666600	75667077	19	chr15	75658719	75670721	GH15J075658	ENSG00000173548	SNX33
chr15	90190759	90191568	19	chr15	90186976	90195693	GH15J090186	ENSG00000185033	SEMA4B
chr16	10594409	10595127	19	chr16	10594317	10599913	GH16J010594	ENSG00000213853	EMP2
chr16	2468242	2469010	19	chr16	2467005	2472383	GH16J002467	ENSG00000167967	E4F1
chr16	2468242	2469010	19	chr16	2467005	2472383	GH16J002467	ENSG00000162068	NTN3
chr16	30950000	30950677	19	chr16	30946766	30951326	GH16J030946	ENSG00000099377	HSD3B7
chr16	30950000	30950677	19	chr16	30946766	30951326	GH16J030946	ENSG00000167394	ZNF668
chr16	592294	593159	19	chr16	586939	595323	GH16J000586	ENSG00000197562	RAB40C
chr16	68658278	68658949	19	chr16	68655900	68661722	GH16J068655	ENSG00000062038	CDH3
chr16	68667996	68668791	19	chr16	68663305	68670017	GH16J068663	ENSG00000062038	CDH3
chr16	68786566	68787092	19	chr16	68785924	68787699	GH16J068785	ENSG00000039068	CDH1
chr16	70699794	70700635	19	chr16	70680117	70709286	GH16J070680	ENSG00000132613	MTSS2
chr16	70699794	70700635	19	chr16	70680117	70709286	GH16J070680	ENSG00000103043	VAC14
chr16	8730013	8730687	19	chr16	8729794	8732036	GH16J008729	ENSG00000183044	ABAT
chr16	87806809	87807514	19	chr16	87805689	87811164	GH16J087805	ENSG00000103257	SLC7A5
chr16	89502312	89503046	19	chr16	89501902	89503424	GH16J089501	ENSG00000197912	SPG7
chr17	15963462	15964252	19	chr17	15962300	15968058	GH17J015962	ENSG00000011295	TTC19
chr17	15963462	15964252	19	chr17	15962300	15968058	GH17J015962	ENSG00000214941	ZSWIM7
chr17	1769923	1770529	19	chr17	1769434	1772000	GH17J001769	ENSG00000132386	SERPINF1
chr17	27331228	27331664	19	chr17	27331314	27334627	GH17J027331	ENSG00000109046	WSB1
chr17	28742984	28743668	19	chr17	28737262	28751176	GH17J028737	ENSG00000076604	TRAF4
chr17	38449088	38449981	19	chr17	38447465	38456827	GH17J038447	ENSG00000275832	ARHGAP23
chr17	40537869	40538587	19	chr17	40528729	40544482	GH17J040528	ENSG00000126353	CCR7
chr17	40537869	40538587	19	chr17	40528729	40544482	GH17J040528	ENSG00000141753	IGFBP4
chr17	40537869	40538587	19	chr17	40528729	40544482	GH17J040528	ENSG00000131759	RARA
chr17	40537869	40538587	19	chr17	40528729	40544482	GH17J040528	ENSG00000073584	SMARCE1
chr17	40547332	40548120	19	chr17	40546964	40567241	GH17J040546	ENSG00000126353	CCR7
chr17	40547332	40548120	19	chr17	40546964	40567241	GH17J040546	ENSG00000073584	SMARCE1
chr17	40547332	40548120	19	chr17	40546964	40567241	GH17J040546	ENSG00000131747	TOP2A
chr17	45043830	45044407	19	chr17	45042715	45049469	GH17J045042	ENSG00000172992	DCAKD
chr17	45047241	45047603	19	chr17	45042715	45049469	GH17J045042	ENSG00000172992	DCAKD
chr17	56982279	56982787	19	chr17	56981088	56986400	GH17J056981	ENSG00000121064	SCPEP1
chr17	57523848	57524488	19	chr17	57521088	57529371	GH17J057521	ENSG00000266100	AC007431.2
chr17	62724584	62725378	19	chr17	62723780	62726521	GH17J062723	ENSG00000265702	AC005821.1
chr17	62724584	62725378	19	chr17	62723780	62726521	GH17J062723	ENSG00000173838	MARCHF10
chr17	65058350	65058984	19	chr17	65054014	65059415	GH17J065054	ENSG00000120063	GNA13
chr17	75684927	75685338	19	chr17	75683044	75702712	GH17J075683	ENSG00000177303	CASKIN2
chr17	75684927	75685338	19	chr17	75683044	75702712	GH17J075683	ENSG00000125447	GGA3
chr17	75684927	75685338	19	chr17	75683044	75702712	GH17J075683	ENSG00000132470	ITGB4
chr17	75684927	75685338	19	chr17	75683044	75702712	GH17J075683	ENSG00000108469	RECQL5
chr17	75684927	75685338	19	chr17	75683044	75702712	GH17J075683	ENSG00000161526	SAP30BP
chr17	75684927	75685338	19	chr17	75683044	75702712	GH17J075683	ENSG00000177728	TMEM94
chr17	76586753	76587355	19	chr17	76586738	76587128	GH17J076586	ENSG00000070731	ST6GALNAC2
chr17	77285767	77286804	19	chr17	77279284	77290291	GH17J077279	ENSG00000184640	SEPTIN9
chr17	77454133	77454865	19	chr17	77449001	77468500	GH17J077449	ENSG00000184640	SEPTIN9
chr17	78351491	78352044	19	chr17	78349919	78361809	GH17J078349	ENSG00000266970	AC061992.2
chr17	78351491	78352044	19	chr17	78349919	78361809	GH17J078349	ENSG00000087157	PGS1
chr17	78351491	78352044	19	chr17	78349919	78361809	GH17J078349	ENSG00000184557	SOCS3
chr17	78351491	78352044	19	chr17	78349919	78361809	GH17J078349	ENSG00000055483	USP36
chr17	81841283	81841915	19	chr17	81839977	81843979	GH17J081839	ENSG00000185624	P4HB
chr17	82105728	82106541	19	chr17	82095064	82108554	GH17J082095	ENSG00000169738	DCXR
chr17	82105728	82106541	19	chr17	82095064	82108554	GH17J082095	ENSG00000169710	FASN
chr17	82105728	82106541	19	chr17	82095064	82108554	GH17J082095	ENSG00000141568	FOXK2
chr17	82105728	82106541	19	chr17	82095064	82108554	GH17J082095	ENSG00000169727	GPS1
chr17	82105728	82106541	19	chr17	82095064	82108554	GH17J082095	ENSG00000169660	HEXD
chr17	82105728	82106541	19	chr17	82095064	82108554	GH17J082095	ENSG00000185359	HGS
chr17	82495670	82496475	19	chr17	82492487	82498497	GH17J082492	ENSG00000169718	DUS1L
chr17	82495670	82496475	19	chr17	82492487	82498497	GH17J082492	ENSG00000141560	FN3KRP
chr17	82495670	82496475	19	chr17	82492487	82498497	GH17J082492	ENSG00000141568	FOXK2
chr17	82495670	82496475	19	chr17	82492487	82498497	GH17J082492	ENSG00000169660	HEXD
chr17	82495670	82496475	19	chr17	82492487	82498497	GH17J082492	ENSG00000141562	NARF
chr17	82495670	82496475	19	chr17	82492487	82498497	GH17J082492	ENSG00000141574	SECTM1
chr17	82495670	82496475	19	chr17	82492487	82498497	GH17J082492	ENSG00000141556	TBCD
chr17	82835963	82836506	19	chr17	82835111	82839087	GH17J082835	ENSG00000141579	ZNF750
chr17	924776	925449	19	chr17	924260	930877	GH17J000924	ENSG00000167693	NXN
chr18	22856869	22857358	19	chr18	22855599	22859000	GH18J022855	ENSG00000266850	AC090912.2
chr18	22856869	22857358	19	chr18	22855599	22859000	GH18J022855	ENSG00000101773	RBBP8
chr18	45806222	45806845	19	chr18	45805707	45807689	GH18J045805	ENSG00000152223	EPG5
chr18	80245885	80246612	19	chr18	80246199	80248001	GH18J080246	ENSG00000178184	PARD6G
chr19	18373651	18374612	19	chr19	18372121	18390078	GH19J018372	ENSG00000130513	GDF15
chr19	18373651	18374612	19	chr19	18372121	18390078	GH19J018372	ENSG00000213999	MEF2B
chr19	38775192	38775818	19	chr19	38775620	38775770	GH19J038775	ENSG00000205076	LGALS7
chr19	38775192	38775818	19	chr19	38775620	38775770	GH19J038775	ENSG00000178934	LGALS7B
chr19	40718922	40719442	19	chr19	40713744	40722950	GH19J040713	ENSG00000123815	COQ8B
chr19	42199375	42200073	19	chr19	42196388	42205218	GH19J042196	ENSG00000105429	MEGF8
chr19	42270749	42271082	19	chr19	42267434	42274340	GH19J042267	ENSG00000079432	CIC
chr19	42270749	42271082	19	chr19	42267434	42274340	GH19J042267	ENSG00000105429	MEGF8
chr19	42270749	42271082	19	chr19	42267434	42274340	GH19J042267	ENSG00000105732	ZNF574
chr19	45446933	45447355	19	chr19	45446080	45452954	GH19J045446	ENSG00000012061	ERCC1
chr19	45446933	45447355	19	chr19	45446080	45452954	GH19J045446	ENSG00000125740	FOSB
chr19	45632405	45632863	19	chr19	45629627	45633344	GH19J045629	ENSG00000125746	EML2
chr19	46206132	46206796	19	chr19	46205383	46207245	GH19J046205	ENSG00000268460	AC006262.1
chr19	46206132	46206796	19	chr19	46205383	46207245	GH19J046205	ENSG00000269745	AC006262.3
chr19	46206132	46206796	19	chr19	46205383	46207245	GH19J046205	ENSG00000269637	RPL12P41
chr19	56295521	56296267	19	chr19	56293938	56296658	GH19J056293	ENSG00000131848	ZSCAN5A
chr2	105404033	105404767	19	chr2	105402467	105406935	GH02J105402	ENSG00000272994	AC012360.3
chr2	105404033	105404767	19	chr2	105402467	105406935	GH02J105402	ENSG00000238273	AC108058.1
chr2	105404033	105404767	19	chr2	105402467	105406935	GH02J105402	ENSG00000135974	C2orf49
chr2	168524968	168525513	19	chr2	168523800	168527628	GH02J168523	ENSG00000172292	CERS6
chr2	1704753	1705724	19	chr2	1704658	1705738	GH02J001704	ENSG00000130508	PXDN
chr2	190578130	190578943	19	chr2	190577512	190580903	GH02J190577	ENSG00000138386	NAB1
chr2	201118553	201119087	19	chr2	201114710	201133720	GH02J201114	ENSG00000003400	CASP10
chr2	201118553	201119087	19	chr2	201114710	201133720	GH02J201114	ENSG00000003402	CFLAR
chr2	201118553	201119087	19	chr2	201114710	201133720	GH02J201114	ENSG00000013441	CLK1
chr2	201118553	201119087	19	chr2	201114710	201133720	GH02J201114	ENSG00000115942	ORC2
chr2	20212415	20213389	19	chr2	20205352	20226614	GH02J020205	ENSG00000055917	PUM2
chr2	20212415	20213389	19	chr2	20205352	20226614	GH02J020205	ENSG00000200763	RNU6-961P
chr2	20212415	20213389	19	chr2	20205352	20226614	GH02J020205	ENSG00000115884	SDC1
chr2	233691092	233691842	19	chr2	233688939	233693062	GH02J233688	ENSG00000167165	UGT1A6
chr2	233691092	233691842	19	chr2	233688939	233693062	GH02J233688	ENSG00000085982	USP40
chr2	234446560	234447191	19	chr2	234443421	234455579	GH02J234443	ENSG00000188042	ARL4C
chr2	28436574	28437190	19	chr2	28435350	28438296	GH02J028435	ENSG00000270210	AC104695.3
chr2	31401474	31402011	19	chr2	31400562	31403384	GH02J031400	ENSG00000158125	XDH
chr2	74010138	74010679	19	chr2	74008045	74010946	GH02J074008	ENSG00000257800	FNBP1P1
chr20	11001797	11002444	19	chr20	11001035	11004318	GH20J011001	ENSG00000270777	AL158042.1
chr20	23139426	23139923	19	chr20	23138922	23140014	GH20J023138	ENSG00000125810	CD93
chr20	31710498	31711298	19	chr20	31709848	31724527	GH20J031709	ENSG00000131055	COX4I2
chr20	31710498	31711298	19	chr20	31709848	31724527	GH20J031709	ENSG00000101306	MYLK2
chr20	31710498	31711298	19	chr20	31709848	31724527	GH20J031709	ENSG00000126003	PLAGL2
chr20	35308051	35308652	19	chr20	35301499	35310515	GH20J035301	ENSG00000242372	EIF6
chr20	35308051	35308652	19	chr20	35301499	35310515	GH20J035301	ENSG00000125965	GDF5
chr20	35308051	35308652	19	chr20	35301499	35310515	GH20J035301	ENSG00000101019	UQCC1
chr20	37358424	37359347	19	chr20	37356000	37359701	GH20J037356	ENSG00000197122	SRC
chr20	37526036	37526706	19	chr20	37516050	37529159	GH20J037516	ENSG00000166619	BLCAP
chr20	45339049	45339583	19	chr20	45334859	45349300	GH20J045334	ENSG00000124145	SDC4
chr20	45339049	45339583	19	chr20	45334859	45349300	GH20J045334	ENSG00000204070	SYS1
chr20	54123520	54124116	19	chr20	54121025	54125979	GH20J054121	ENSG00000019186	CYP24A1
chr20	56359339	56360362	19	chr20	56358372	56364370	GH20J056358	ENSG00000087586	AURKA
chr20	56359339	56360362	19	chr20	56358372	56364370	GH20J056358	ENSG00000101138	CSTF1
chr20	56359339	56360362	19	chr20	56358372	56364370	GH20J056358	ENSG00000124098	FAM210B
chr20	62856785	62857668	19	chr20	62857288	62857438	GH20J062857	ENSG00000101190	TCFL5
chr21	42170983	42171693	19	chr21	42169516	42172217	GH21J042169	ENSG00000160179	ABCG1
chr22	26493347	26494156	19	chr22	26492175	26494541	GH22J026492	ENSG00000100104	SRRD
chr22	26493347	26494156	19	chr22	26492175	26494541	GH22J026492	ENSG00000100109	TFIP11
chr22	26567951	26568642	19	chr22	26566868	26569645	GH22J026566	ENSG00000213707	HMGB1P10
chr22	26567951	26568642	19	chr22	26566868	26569645	GH22J026566	ENSG00000128294	TPST2
chr22	27719321	27719902	19	chr22	27717144	27720402	GH22J027717	ENSG00000169184	MN1
chr22	29070983	29072075	19	chr22	29070758	29075530	GH22J029070	ENSG00000183762	KREMEN1
chr22	37749873	37750343	19	chr22	37745254	37756174	GH22J037745	ENSG00000100116	GCAT
chr22	37749873	37750343	19	chr22	37745254	37756174	GH22J037745	ENSG00000189060	H1-0
chr22	37749873	37750343	19	chr22	37745254	37756174	GH22J037745	ENSG00000100106	TRIOBP
chr22	42918433	42918856	19	chr22	42918034	42924999	GH22J042918	ENSG00000242247	ARFGAP3
chr3	112378887	112379673	19	chr3	112376401	112380352	GH03J112376	ENSG00000091972	CD200
chr3	11529724	11530504	19	chr3	11529117	11531438	GH03J011529	ENSG00000197548	ATG7
chr3	122789761	122790386	19	chr3	122788400	122790742	GH03J122788	ENSG00000173193	PARP14
chr3	126753107	126753863	19	chr3	126750220	126754657	GH03J126750	ENSG00000159685	CHCHD6
chr3	14199423	14200063	19	chr3	14199613	14201438	GH03J014199	ENSG00000154767	XPC
chr3	153138469	153139183	19	chr3	153137329	153142175	GH03J153137	ENSG00000244268	AC117394.2
chr3	153138469	153139183	19	chr3	153137329	153142175	GH03J153137	ENSG00000181467	RAP2B
chr3	156680955	156681444	19	chr3	156673333	156687687	GH03J156673	ENSG00000163660	CCNL1
chr3	156680955	156681444	19	chr3	156673333	156687687	GH03J156673	ENSG00000197980	LEKR1
chr3	156680955	156681444	19	chr3	156673333	156687687	GH03J156673	ENSG00000240875	LINC00886
chr3	156680955	156681444	19	chr3	156673333	156687687	GH03J156673	ENSG00000163659	TIPARP
chr3	187183063	187183660	19	chr3	187182531	187184073	GH03J187182	ENSG00000175077	RTP1
chr3	194089499	194090170	19	chr3	194088123	194091989	GH03J194088	ENSG00000114315	HES1
chr3	49803543	49804382	19	chr3	49802167	49809387	GH03J049802	ENSG00000185614	INKA1
chr3	52053422	52054303	19	chr3	52044627	52058616	GH03J052044	ENSG00000164086	DUSP7
chr3	52053422	52054303	19	chr3	52044627	52058616	GH03J052044	ENSG00000180929	GPR62
chr3	52053422	52054303	19	chr3	52044627	52058616	GH03J052044	ENSG00000168268	NT5DC2
chr4	139887873	139888487	19	chr4	139886622	139889345	GH04J139886	ENSG00000196782	MAML3
chr4	140308269	140308913	19	chr4	140307320	140310165	GH04J140307	ENSG00000153130	SCOC
chr4	145881977	145882464	19	chr4	145880488	145883641	GH04J145880	ENSG00000151612	ZNF827
chr4	147820943	147821415	19	chr4	147820713	147823800	GH04J147820	ENSG00000071205	ARHGAP10
chr4	156771323	156771851	19	chr4	156769479	156776779	GH04J156769	ENSG00000248629	AC092608.1
chr4	156771323	156771851	19	chr4	156769479	156776779	GH04J156769	ENSG00000145431	PDGFC
chr4	168811179	168811711	19	chr4	168810730	168814107	GH04J168810	ENSG00000129116	PALLD
chr4	184328115	184328557	19	chr4	184326757	184333189	GH04J184326	ENSG00000180712	LINC02363
chr4	2937020	2937870	19	chr4	2930116	2938286	GH04J002930	ENSG00000109736	MFSD10
chr4	2937020	2937870	19	chr4	2930116	2938286	GH04J002930	ENSG00000249673	NOP14-AS1
chr4	3484535	3485255	19	chr4	3480133	3487793	GH04J003480	ENSG00000175920	DOK7
chr5	113161686	113162129	19	chr5	113161157	113164374	GH05J113161	ENSG00000171444	MCC
chr5	126368216	126368910	19	chr5	126367360	126375070	GH05J126367	ENSG00000155324	GRAMD2B
chr5	134110409	134110919	19	chr5	134110203	134111104	GH05J134110	ENSG00000081059	TCF7
chr5	138504750	138505449	19	chr5	138503391	138505833	GH05J138503	ENSG00000120705	ETF1
chr5	140237017	140237762	19	chr5	140235600	140237660	GH05J140235	ENSG00000120306	CYSTM1
chr5	140237017	140237762	19	chr5	140235600	140237660	GH05J140235	ENSG00000113068	PFDN1
chr5	140557253	140557907	19	chr5	140555474	140558750	GH05J140555	ENSG00000113108	APBB3
chr5	140557253	140557907	19	chr5	140555474	140558750	GH05J140555	ENSG00000213523	SRA1
chr5	143200722	143201192	19	chr5	143199648	143202006	GH05J143199	ENSG00000230789	ARHGAP26-IT1
chr5	150492474	150493071	19	chr5	150484852	150493767	GH05J150484	ENSG00000070614	NDST1
chr5	163437542	163438209	19	chr5	163436149	163439904	GH05J163436	ENSG00000170584	NUDCD2
chr5	177389636	177390317	19	chr5	177388050	177392188	GH05J177388	ENSG00000131183	SLC34A1
chr6	105372636	105373671	19	chr6	105370337	105375195	GH06J105370	ENSG00000085377	PREP
chr6	111483836	111484404	19	chr6	111477331	111485982	GH06J111477	ENSG00000173214	MFSD4B
chr6	137813167	137813945	19	chr6	137810343	137814032	GH06J137810	ENSG00000237499	WAKMAR2
chr6	150272412	150273028	19	chr6	150266225	150274512	GH06J150266	ENSG00000198729	PPP1R14C
chr6	169224146	169224626	19	chr6	169223883	169226295	GH06J169223	ENSG00000226445	BX322234.1
chr6	169224146	169224626	19	chr6	169223883	169226295	GH06J169223	ENSG00000186340	THBS2
chr6	30810763	30811350	19	chr6	30810272	30816200	GH06J030810	ENSG00000204580	DDR1
chr6	30810763	30811350	19	chr6	30810272	30816200	GH06J030810	ENSG00000137331	IER3
chr6	30810763	30811350	19	chr6	30810272	30816200	GH06J030810	ENSG00000214894	LINC00243
chr6	30810763	30811350	19	chr6	30810272	30816200	GH06J030810	ENSG00000066379	ZNRD1
chr6	35297752	35298592	19	chr6	35296979	35305805	GH06J035296	ENSG00000023892	DEF6
chr6	35297752	35298592	19	chr6	35296979	35305805	GH06J035296	ENSG00000112033	PPARD
chr6	35297752	35298592	19	chr6	35296979	35305805	GH06J035296	ENSG00000065029	ZNF76
chr6	36676053	36676840	19	chr6	36675633	36686064	GH06J036675	ENSG00000112062	MAPK14
chr6	36676053	36676840	19	chr6	36675633	36686064	GH06J036675	ENSG00000255587	RAB44
chr6	36676053	36676840	19	chr6	36675633	36686064	GH06J036675	ENSG00000238554	RNU1-88P
chr6	36682339	36683030	19	chr6	36675633	36686064	GH06J036675	ENSG00000112062	MAPK14
chr6	36682339	36683030	19	chr6	36675633	36686064	GH06J036675	ENSG00000255587	RAB44
chr6	36682339	36683030	19	chr6	36675633	36686064	GH06J036675	ENSG00000238554	RNU1-88P
chr6	44201639	44202395	19	chr6	44200586	44204018	GH06J044200	ENSG00000137225	CAPN11
chr6	63573228	63574180	19	chr6	63569468	63576810	GH06J063569	ENSG00000118482	PHF3
chr6	63598455	63599116	19	chr6	63597800	63599325	GH06J063597	ENSG00000118482	PHF3
chr6	69894573	69895047	19	chr6	69892794	69895791	GH06J069892	ENSG00000082293	COL19A1
chr6	79544971	79545432	19	chr6	79543180	79547287	GH06J079543	ENSG00000198478	SH3BGRL2
chr6	90175786	90176413	19	chr6	90175375	90176895	GH06J090175	ENSG00000112182	BACH2
chr7	110534539	110535073	19	chr7	110533662	110535564	GH07J110533	ENSG00000226965	AC073114.1
chr7	130373686	130374303	19	chr7	130362722	130375437	GH07J130362	ENSG00000091704	CPA1
chr7	130373686	130374303	19	chr7	130362722	130375437	GH07J130362	ENSG00000158525	CPA5
chr7	130373686	130374303	19	chr7	130362722	130375437	GH07J130362	ENSG00000128607	KLHDC10
chr7	130373686	130374303	19	chr7	130362722	130375437	GH07J130362	ENSG00000106484	MEST
chr7	44797187	44797931	19	chr7	44795368	44799513	GH07J044795	ENSG00000105968	H2AZ2
chr7	44797187	44797931	19	chr7	44795368	44799513	GH07J044795	ENSG00000196262	PPIA
chr7	44797187	44797931	19	chr7	44795368	44799513	GH07J044795	ENSG00000122515	ZMIZ2
chr7	4683083	4684175	19	chr7	4681382	4685761	GH07J004681	ENSG00000182095	TNRC18
chr7	66359609	66360201	19	chr7	66358490	66361083	GH07J066358	ENSG00000169902	TPST1
chr7	7100152	7100853	19	chr7	7098986	7101199	GH07J007098	ENSG00000106392	C1GALT1
chr7	73838364	73838983	19	chr7	73838332	73839400	GH07J073838	ENSG00000165171	METTL27
chr7	74312603	74313065	19	chr7	74311370	74313372	GH07J074311	ENSG00000106665	CLIP2
chr8	143738314	143739055	19	chr8	143731692	143742802	GH08J143731	ENSG00000203499	IQANK1
chr8	48696188	48696734	19	chr8	48695087	48697180	GH08J048695	ENSG00000253608	AC022915.2
chr8	48696188	48696734	19	chr8	48695087	48697180	GH08J048695	ENSG00000034239	EFCAB1
chr8	48703982	48704802	19	chr8	48703632	48705535	GH08J048703	ENSG00000034239	EFCAB1
chr8	65948511	65948962	19	chr8	65944442	65957102	GH08J065944	ENSG00000205268	PDE7A
chr8	94657120	94657854	19	chr8	94656665	94658644	GH08J094656	ENSG00000104413	ESRP1
chr9	114472771	114473306	19	chr9	114472860	114473010	GH09J114472	ENSG00000095397	WHRN
chr9	114908037	114908933	19	chr9	114906103	114911130	GH09J114906	ENSG00000181634	TNFSF15
chr9	114908037	114908933	19	chr9	114906103	114911130	GH09J114906	ENSG00000106952	TNFSF8
chr9	121398110	121398847	19	chr9	121397646	121400599	GH09J121397	ENSG00000227355	AL359644.1
chr9	127566163	127566806	19	chr9	127553075	127576818	GH09J127553	ENSG00000225032	AL162586.1
chr9	127566163	127566806	19	chr9	127553075	127576818	GH09J127553	ENSG00000106991	ENG
chr9	127566163	127566806	19	chr9	127553075	127576818	GH09J127553	ENSG00000136877	FPGS
chr9	127566163	127566806	19	chr9	127553075	127576818	GH09J127553	ENSG00000136830	NIBAN2
chr9	128902232	128902973	19	chr9	128897996	128904799	GH09J128897	ENSG00000171097	KYAT1
chr9	129278231	129279068	19	chr9	129277981	129278999	GH09J129277	ENSG00000224307	AL161785.1
chr9	129331925	129332635	19	chr9	129330981	129338104	GH09J129330	ENSG00000233901	LINC01503
chr9	131714067	131714439	19	chr9	131703401	131716997	GH09J131704	ENSG00000107263	RAPGEF1
chr9	133881153	133881517	19	chr9	133880008	133883893	GH09J133880	ENSG00000160293	VAV2
chr9	133944505	133945140	19	chr9	133943497	133947294	GH09J133943	ENSG00000160293	VAV2
chr9	134379758	134380700	19	chr9	134369342	134388125	GH09J134369	ENSG00000186350	RXRA
chr9	136108354	136109045	19	chr9	136105535	136111465	GH09J136105	ENSG00000238227	TMEM250
chr9	136109266	136110220	19	chr9	136105535	136111465	GH09J136105	ENSG00000238227	TMEM250
chr9	33418081	33418561	19	chr9	33413997	33418853	GH09J033413	ENSG00000165272	AQP3
chr9	33418081	33418561	19	chr9	33413997	33418853	GH09J033413	ENSG00000165269	AQP7
chr9	35905736	35906374	19	chr9	35904489	35911844	GH09J035904	ENSG00000196196	HRCT1
chr9	35905736	35906374	19	chr9	35904489	35911844	GH09J035904	ENSG00000168828	OR13J1
chr9	35905736	35906374	19	chr9	35904489	35911844	GH09J035904	ENSG00000235387	SPAAR
chr9	35905736	35906374	19	chr9	35904489	35911844	GH09J035904	ENSG00000137103	TMEM8B
chr9	77981314	77981706	19	chr9	77979829	77982651	GH09J077979	ENSG00000156052	GNAQ
chr9	84851900	84852498	19	chr9	84850703	84852833	GH09J084850	ENSG00000148053	NTRK2
chr9	90970494	90971158	19	chr9	90969166	90971649	GH09J090969	ENSG00000228216	AL355607.1
chrX	17547664	17548287	19	chrX	17546948	17549865	GH0XJ017546	ENSG00000188158	NHS
chrX	2710489	2710862	19	chrX	2703200	2711200	GH0XJ002703	ENSG00000002586	CD99
chr1	10083145	10083540	18	chr1	10082894	10084151	GH01J010082	ENSG00000201746	RNU6-828P
chr1	109263161	109263802	18	chr1	109262655	109264164	GH01J109262	ENSG00000134222	PSRC1
chr1	116693756	116694328	18	chr1	116693438	116695225	GH01J116693	ENSG00000143061	IGSF3
chr1	151058478	151059218	18	chr1	151054066	151063940	GH01J151054	ENSG00000143458	GABPB2
chr1	151713673	151714241	18	chr1	151712103	151718449	GH01J151712	ENSG00000178796	RIIAD1
chr1	152023928	152024635	18	chr1	152022472	152025631	GH01J152022	ENSG00000229021	AL450992.2
chr1	153525961	153526620	18	chr1	153524920	153528149	GH01J153524	ENSG00000263841	RN7SL44P
chr1	153615222	153616025	18	chr1	153606661	153618256	GH01J153606	ENSG00000189334	S100A14
chr1	153615222	153616025	18	chr1	153606661	153618256	GH01J153606	ENSG00000188643	S100A16
chr1	154320821	154321204	18	chr1	154320552	154322358	GH01J154320	ENSG00000143595	AQP10
chr1	154320821	154321204	18	chr1	154320552	154322358	GH01J154320	ENSG00000143515	ATP8B2
chr1	154418191	154418896	18	chr1	154417744	154424412	GH01J154417	ENSG00000160712	IL6R
chr1	159009585	159010382	18	chr1	159004767	159017376	GH01J159004	ENSG00000163565	IFI16
chr1	160767642	160768253	18	chr1	160766653	160769060	GH01J160766	ENSG00000122223	CD244
chr1	160767642	160768253	18	chr1	160766653	160769060	GH01J160766	ENSG00000026751	SLAMF7
chr1	165903549	165904157	18	chr1	165902842	165904807	GH01J165902	ENSG00000236364	AL358115.1
chr1	165903549	165904157	18	chr1	165902842	165904807	GH01J165902	ENSG00000143179	UCK2
chr1	168112826	168113365	18	chr1	168112679	168113599	GH01J168112	ENSG00000143147	GPR161
chr1	169115857	169116374	18	chr1	169115326	169117967	GH01J169115	ENSG00000143156	NME7
chr1	179038844	179039485	18	chr1	179038199	179039604	GH01J179038	ENSG00000116199	FAM20B
chr1	200894690	200895095	18	chr1	200890650	200900619	GH01J200890	ENSG00000163362	INAVA
chr1	201397018	201397543	18	chr1	201394515	201402256	GH01J201394	ENSG00000159166	LAD1
chr1	201468610	201469546	18	chr1	201465019	201470225	GH01J201465	ENSG00000224818	AC096677.2
chr1	201468610	201469546	18	chr1	201465019	201470225	GH01J201465	ENSG00000174307	PHLDA3
chr1	203306433	203306877	18	chr1	203298431	203310649	GH01J203298	ENSG00000122176	FMOD
chr1	205258723	205259471	18	chr1	205258088	205260618	GH01J205258	ENSG00000133059	DSTYK
chr1	205284382	205285146	18	chr1	205283601	205289226	GH01J205283	ENSG00000133059	DSTYK
chr1	205284382	205285146	18	chr1	205283601	205289226	GH01J205283	ENSG00000163545	NUAK2
chr1	214573870	214574417	18	chr1	214569108	214575790	GH01J214569	ENSG00000117724	CENPF
chr1	214573870	214574417	18	chr1	214569108	214575790	GH01J214569	ENSG00000152104	PTPN14
chr1	228486528	228487299	18	chr1	228485899	228489193	GH01J228485	ENSG00000168159	RNF187
chr1	229225348	229225862	18	chr1	229224580	229226183	GH01J229224	ENSG00000233920	AL162595.2
chr1	235917535	235917953	18	chr1	235916150	235924799	GH01J235916	ENSG00000143669	LYST
chr1	27522231	27522900	18	chr1	27516969	27530656	GH01J027516	ENSG00000009780	FAM76A
chr1	27522231	27522900	18	chr1	27516969	27530656	GH01J027516	ENSG00000142765	SYTL1
chr1	27522231	27522900	18	chr1	27516969	27530656	GH01J027516	ENSG00000158195	WASF2
chr1	28241836	28242242	18	chr1	28241474	28242489	GH01J028241	ENSG00000270605	AL353622.1
chr1	30748027	30748552	18	chr1	30737288	30765246	GH01J030737	ENSG00000162511	LAPTM5
chr1	30748027	30748552	18	chr1	30737288	30765246	GH01J030737	ENSG00000134644	PUM1
chr1	33220971	33221515	18	chr1	33218999	33222501	GH01J033219	ENSG00000116525	TRIM62
chr1	93597679	93598246	18	chr1	93597413	93599493	GH01J093597	ENSG00000137936	BCAR3
chr10	103676055	103676553	18	chr10	103675001	103679968	GH10J103675	ENSG00000107957	SH3PXD2A
chr10	103900189	103900702	18	chr10	103899858	103901854	GH10J103900	ENSG00000065613	SLK
chr10	103900189	103900702	18	chr10	103899858	103901854	GH10J103900	ENSG00000107960	STN1
chr10	113099299	113099796	18	chr10	113099348	113100191	GH10J113099	ENSG00000148737	TCF7L2
chr10	124524851	124525394	18	chr10	124524964	124525639	GH10J124524	ENSG00000203791	EEF1AKMT2
chr10	124524851	124525394	18	chr10	124524964	124525639	GH10J124524	ENSG00000107902	LHPP
chr10	29479125	29479438	18	chr10	29478751	29479801	GH10J029478	ENSG00000224597	SVIL-AS1
chr10	45514236	45514778	18	chr10	45513804	45514921	GH10J045514	ENSG00000165406	MARCHF8
chr10	50325422	50325892	18	chr10	50324469	50329979	GH10J050324	ENSG00000198964	SGMS1
chr10	5618001	5618445	18	chr10	5617573	5620524	GH10J005617	ENSG00000196372	ASB13
chr10	59337217	59337594	18	chr10	59336138	59338462	GH10J059336	ENSG00000148541	FAM13C
chr10	71246765	71247439	18	chr10	71243319	71249902	GH10J071243	ENSG00000107731	UNC5B
chr10	71246765	71247439	18	chr10	71243319	71249902	GH10J071243	ENSG00000237512	UNC5B-AS1
chr10	71333086	71333805	18	chr10	71332609	71334881	GH10J071332	ENSG00000198246	SLC29A3
chr10	80471016	80471496	18	chr10	80453019	80475714	GH10J080453	ENSG00000122378	PRXL2A
chr10	80471016	80471496	18	chr10	80453019	80475714	GH10J080453	ENSG00000108219	TSPAN14
chr10	86958689	86959372	18	chr10	86953474	86961447	GH10J086953	ENSG00000173267	SNCG
chr10	88990975	88991540	18	chr10	88988928	88997555	GH10J088988	ENSG00000107796	ACTA2
chr10	93465916	93466639	18	chr10	93455673	93484041	GH10J093455	ENSG00000138180	CEP55
chr10	97412839	97413326	18	chr10	97412497	97415636	GH10J097412	ENSG00000052749	RRP12
chr10	99621243	99621858	18	chr10	99617149	99622718	GH10J099617	ENSG00000095485	CWF19L1
chr10	99621243	99621858	18	chr10	99617149	99622718	GH10J099617	ENSG00000233690	EBAG9P1
chr11	118691951	118692735	18	chr11	118691632	118693311	GH11J118691	ENSG00000255239	TREHP1
chr11	119696316	119696988	18	chr11	119690164	119702813	GH11J119690	ENSG00000110400	NECTIN1
chr11	27040159	27040644	18	chr11	27040079	27042096	GH11J027040	ENSG00000129151	BBOX1
chr11	33045833	33046261	18	chr11	33043086	33046713	GH11J033043	ENSG00000176148	TCP11L1
chr11	35276301	35276741	18	chr11	35274775	35277616	GH11J035274	ENSG00000255004	AL133330.2
chr11	35276301	35276741	18	chr11	35274775	35277616	GH11J035274	ENSG00000110436	SLC1A2
chr11	44564463	44565293	18	chr11	44560858	44571392	GH11J044560	ENSG00000254693	AC010768.1
chr11	44564463	44565293	18	chr11	44560858	44571392	GH11J044560	ENSG00000085117	CD82
chr11	76784382	76785031	18	chr11	76780723	76785733	GH11J076780	ENSG00000255100	AP003119.2
chr11	76784382	76785031	18	chr11	76780723	76785733	GH11J076780	ENSG00000182704	TSKU
chr12	108696487	108696959	18	chr12	108684833	108698437	GH12J108684	ENSG00000110880	CORO1C
chr12	108838224	108838766	18	chr12	108820020	108843400	GH12J108820	ENSG00000110880	CORO1C
chr12	108838224	108838766	18	chr12	108820020	108843400	GH12J108820	ENSG00000110876	SELPLG
chr12	108838224	108838766	18	chr12	108820020	108843400	GH12J108820	ENSG00000084112	SSH1
chr12	109864866	109865319	18	chr12	109863310	109866009	GH12J109863	ENSG00000139433	GLTP
chr12	11745951	11746478	18	chr12	11743001	11761134	GH12J011743	ENSG00000139083	ETV6
chr12	119667759	119668301	18	chr12	119666935	119675368	GH12J119666	ENSG00000111725	PRKAB1
chr12	124938557	124939027	18	chr12	124937031	124942002	GH12J124937	ENSG00000150990	DHX37
chr12	124938557	124939027	18	chr12	124937031	124942002	GH12J124937	ENSG00000150991	UBC
chr12	14961483	14962013	18	chr12	14945762	14964864	GH12J014945	ENSG00000111348	ARHGDIB
chr12	14961483	14962013	18	chr12	14945762	14964864	GH12J014945	ENSG00000139055	ERP27
chr12	14961483	14962013	18	chr12	14945762	14964864	GH12J014945	ENSG00000084463	WBP11
chr12	27580863	27581256	18	chr12	27579380	27584618	GH12J027579	ENSG00000110841	PPFIBP1
chr12	28032959	28033630	18	chr12	28031867	28036000	GH12J028031	ENSG00000087494	PTHLH
chr12	54285936	54286368	18	chr12	54285194	54291145	GH12J054285	ENSG00000258344	AC078778.1
chr12	54285936	54286368	18	chr12	54285194	54291145	GH12J054285	ENSG00000135486	HNRNPA1
chr12	54390158	54390964	18	chr12	54381501	54391979	GH12J054381	ENSG00000161642	ZNF385A
chr12	57888478	57888948	18	chr12	57886452	57900137	GH12J057886	ENSG00000245651	AC083805.1
chr12	57888478	57888948	18	chr12	57886452	57900137	GH12J057886	ENSG00000135446	CDK4
chr12	57888478	57888948	18	chr12	57886452	57900137	GH12J057886	ENSG00000123427	EEF1AKMT3
chr12	57888478	57888948	18	chr12	57886452	57900137	GH12J057886	ENSG00000123297	TSFM
chr12	64169907	64170441	18	chr12	64169811	64173492	GH12J064169	ENSG00000255629	AC025576.1
chr12	68787393	68787910	18	chr12	68783800	68789045	GH12J068783	ENSG00000256678	AC025423.3
chr12	68787393	68787910	18	chr12	68783800	68789045	GH12J068783	ENSG00000135679	MDM2
chr12	68787393	68787910	18	chr12	68783800	68789045	GH12J068783	ENSG00000175782	SLC35E3
chr12	75177768	75178360	18	chr12	75177315	75178750	GH12J075177	ENSG00000166006	KCNC2
chr12	77065658	77066270	18	chr12	77058880	77066925	GH12J077058	ENSG00000165891	E2F7
chr12	92552890	92553802	18	chr12	92549576	92560095	GH12J092549	ENSG00000133639	BTG1
chr12	9872599	9873230	18	chr12	9864759	9873120	GH12J009864	ENSG00000255882	AC091814.1
chr13	27634064	27634680	18	chr13	27633400	27635580	GH13J027633	ENSG00000186184	POLR1D
chr13	39506995	39507499	18	chr13	39506234	39508006	GH13J039506	ENSG00000183722	LHFPL6
chr13	44311049	44311535	18	chr13	44300108	44314859	GH13J044300	ENSG00000151778	SERP2
chr14	104968648	104968994	18	chr14	104966316	104978601	GH14J104966	ENSG00000185567	AHNAK2
chr14	104968648	104968994	18	chr14	104966316	104978601	GH14J104966	ENSG00000170779	CDCA4
chr14	104968648	104968994	18	chr14	104966316	104978601	GH14J104966	ENSG00000140104	CLBA1
chr14	22536819	22537345	18	chr14	22504825	22571549	GH14J022504	ENSG00000100439	ABHD4
chr14	22536819	22537345	18	chr14	22504825	22571549	GH14J022504	ENSG00000259003	AC243965.1
chr14	22536819	22537345	18	chr14	22504825	22571549	GH14J022504	ENSG00000100802	C14orf93
chr14	22536819	22537345	18	chr14	22504825	22571549	GH14J022504	ENSG00000129562	DAD1
chr14	22536819	22537345	18	chr14	22504825	22571549	GH14J022504	ENSG00000157227	MMP14
chr14	22536819	22537345	18	chr14	22504825	22571549	GH14J022504	ENSG00000100462	PRMT5
chr14	22536819	22537345	18	chr14	22504825	22571549	GH14J022504	ENSG00000100461	RBM23
chr14	22536819	22537345	18	chr14	22504825	22571549	GH14J022504	ENSG00000277734	TRAC
chr14	64722915	64723278	18	chr14	64714139	64728181	GH14J064714	ENSG00000126822	PLEKHG3
chr14	64722915	64723278	18	chr14	64714139	64728181	GH14J064714	ENSG00000126804	ZBTB1
chr14	71371964	71372944	18	chr14	71370515	71373399	GH14J071370	ENSG00000197555	SIPA1L1
chr14	77033108	77033662	18	chr14	77021581	77047176	GH14J077021	ENSG00000198894	CIPC
chr14	77033108	77033662	18	chr14	77021581	77047176	GH14J077021	ENSG00000119669	IRF2BPL
chr14	77033108	77033662	18	chr14	77021581	77047176	GH14J077021	ENSG00000246548	LINC02288
chr14	81393634	81394027	18	chr14	81392730	81394292	GH14J081392	ENSG00000140022	STON2
chr15	30961866	30962465	18	chr15	30961964	30963143	GH15J030962	ENSG00000166912	MTMR10
chr15	41832844	41833235	18	chr15	41832301	41834192	GH15J041832	ENSG00000243789	JMJD7
chr15	50686730	50687327	18	chr15	50685380	50687970	GH15J050685	ENSG00000092439	TRPM7
chr15	52558015	52558619	18	chr15	52557090	52560274	GH15J052557	ENSG00000128989	ARPP19
chr15	52558015	52558619	18	chr15	52557090	52560274	GH15J052557	ENSG00000197535	MYO5A
chr15	63156870	63157679	18	chr15	63155443	63158762	GH15J063155	ENSG00000103642	LACTB
chr15	63156870	63157679	18	chr15	63155443	63158762	GH15J063155	ENSG00000185088	RPS27L
chr15	72222372	72222930	18	chr15	72221882	72224754	GH15J072221	ENSG00000175318	GRAMD2A
chr15	78988287	78988898	18	chr15	78987256	78991539	GH15J078987	ENSG00000058335	RASGRF1
chr15	83288406	83289000	18	chr15	83277586	83289950	GH15J083277	ENSG00000169594	BNC1
chr15	89379280	89380149	18	chr15	89378272	89380922	GH15J089378	ENSG00000255571	MIR9-3HG
chr15	91866628	91867430	18	chr15	91864597	91868936	GH15J091864	ENSG00000176463	SLCO3A1
chr16	11497001	11497765	18	chr16	11493208	11499799	GH16J011493	ENSG00000188897	AC099489.1
chr16	21150656	21151131	18	chr16	21150356	21151338	GH16J021150	ENSG00000011638	TMEM159
chr16	57276584	57276970	18	chr16	57275941	57278401	GH16J057275	ENSG00000102934	PLLP
chr16	67966186	67966635	18	chr16	67963111	67970096	GH16J067963	ENSG00000132600	PRMT7
chr16	75011421	75012144	18	chr16	75010124	75013731	GH16J075010	ENSG00000103091	WDR59
chr16	75011421	75012144	18	chr16	75010124	75013731	GH16J075010	ENSG00000186187	ZNRF1
chr16	81621465	81621825	18	chr16	81620218	81622939	GH16J081620	ENSG00000153815	CMIP
chr16	88879327	88879978	18	chr16	88879019	88882715	GH16J088879	ENSG00000259881	AC092384.2
chr16	88879327	88879978	18	chr16	88879019	88882715	GH16J088879	ENSG00000129993	CBFA2T3
chr16	88879327	88879978	18	chr16	88879019	88882715	GH16J088879	ENSG00000141012	GALNS
chr17	17913779	17914500	18	chr17	17913461	17915095	GH17J017913	ENSG00000108557	RAI1
chr17	31274135	31274760	18	chr17	31273717	31275399	GH17J031273	ENSG00000126861	OMG
chr17	41800536	41801114	18	chr17	41798763	41802238	GH17J041798	ENSG00000173801	JUP
chr17	41800536	41801114	18	chr17	41798763	41802238	GH17J041798	ENSG00000141698	NT5C3B
chr17	44348784	44349177	18	chr17	44344431	44349883	GH17J044344	ENSG00000030582	GRN
chr17	44348784	44349177	18	chr17	44344431	44349883	GH17J044344	ENSG00000168591	TMUB2
chr17	44348784	44349177	18	chr17	44344431	44349883	GH17J044344	ENSG00000108312	UBTF
chr17	50062350	50062849	18	chr17	50046265	50067562	GH17J050046	ENSG00000005884	ITGA3
chr17	50062350	50062849	18	chr17	50046265	50067562	GH17J050046	ENSG00000246640	PICART1
chr17	51153394	51154109	18	chr17	51152246	51155110	GH17J051152	ENSG00000239672	NME1
chr17	51153394	51154109	18	chr17	51152246	51155110	GH17J051152	ENSG00000243678	NME2
chr17	51153394	51154109	18	chr17	51152246	51155110	GH17J051152	ENSG00000011260	UTP18
chr17	58364565	58365102	18	chr17	58362936	58366828	GH17J058362	ENSG00000108375	RNF43
chr17	58364565	58365102	18	chr17	58362936	58366828	GH17J058362	ENSG00000213246	SUPT4H1
chr17	58364565	58365102	18	chr17	58362936	58366828	GH17J058362	ENSG00000005379	TSPOAP1
chr17	74872653	74873160	18	chr17	74871526	74878746	GH17J074871	ENSG00000161513	FDXR
chr17	75700327	75701039	18	chr17	75683044	75702712	GH17J075683	ENSG00000177303	CASKIN2
chr17	75700327	75701039	18	chr17	75683044	75702712	GH17J075683	ENSG00000125447	GGA3
chr17	75700327	75701039	18	chr17	75683044	75702712	GH17J075683	ENSG00000132470	ITGB4
chr17	75700327	75701039	18	chr17	75683044	75702712	GH17J075683	ENSG00000108469	RECQL5
chr17	75700327	75701039	18	chr17	75683044	75702712	GH17J075683	ENSG00000161526	SAP30BP
chr17	75700327	75701039	18	chr17	75683044	75702712	GH17J075683	ENSG00000177728	TMEM94
chr17	78383815	78384424	18	chr17	78368446	78387317	GH17J078368	ENSG00000266970	AC061992.2
chr17	78383815	78384424	18	chr17	78368446	78387317	GH17J078368	ENSG00000087157	PGS1
chr17	81087196	81087535	18	chr17	81086359	81088548	GH17J081086	ENSG00000175866	BAIAP2
chr17	81239676	81240140	18	chr17	81238108	81240710	GH17J081238	ENSG00000224877	NDUFAF8
chr17	81239676	81240140	18	chr17	81238108	81240710	GH17J081238	ENSG00000167302	TEPSIN
chr17	82875990	82876433	18	chr17	82870468	82879335	GH17J082870	ENSG00000141556	TBCD
chr17	82875990	82876433	18	chr17	82870468	82879335	GH17J082870	ENSG00000141579	ZNF750
chr18	12309634	12310270	18	chr18	12306051	12311260	GH18J012306	ENSG00000141385	AFG3L2
chr18	12309634	12310270	18	chr18	12306051	12311260	GH18J012306	ENSG00000141391	PRELID3A
chr18	12309634	12310270	18	chr18	12306051	12311260	GH18J012306	ENSG00000176014	TUBB6
chr18	31255950	31256314	18	chr18	31255296	31256935	GH18J031255	ENSG00000134755	DSC2
chr18	31255950	31256314	18	chr18	31255296	31256935	GH18J031255	ENSG00000134760	DSG1
chr18	54247044	54247505	18	chr18	54246041	54248675	GH18J054246	ENSG00000134046	MBD2
chr18	54247044	54247505	18	chr18	54246041	54248675	GH18J054246	ENSG00000101751	POLI
chr18	63345962	63346475	18	chr18	63345345	63347812	GH18J063345	ENSG00000119537	KDSR
chr18	80179942	80180612	18	chr18	80178520	80180904	GH18J080178	ENSG00000267251	AC139100.1
chr18	80179942	80180612	18	chr18	80178520	80180904	GH18J080178	ENSG00000178184	PARD6G
chr18	9671148	9671573	18	chr18	9670714	9674759	GH18J009670	ENSG00000168461	RAB31
chr18	9671148	9671573	18	chr18	9670714	9674759	GH18J009670	ENSG00000212572	RNU6-903P
chr19	1027710	1028658	18	chr19	1025461	1031298	GH19J001025	ENSG00000064687	ABCA7
chr19	13844162	13844614	18	chr19	13833000	13856144	GH19J013833	ENSG00000104957	CCDC130
chr19	13844162	13844614	18	chr19	13833000	13856144	GH19J013833	ENSG00000132017	DCAF15
chr19	13844162	13844614	18	chr19	13833000	13856144	GH19J013833	ENSG00000037757	MRI1
chr19	13844162	13844614	18	chr19	13833000	13856144	GH19J013833	ENSG00000132003	ZSWIM4
chr19	18364609	18365328	18	chr19	18361442	18368002	GH19J018361	ENSG00000130517	PGPEP1
chr19	18364609	18365328	18	chr19	18361442	18368002	GH19J018361	ENSG00000064607	SUGP2
chr19	38792884	38793562	18	chr19	38792214	38794105	GH19J038792	ENSG00000178934	LGALS7B
chr19	38792884	38793562	18	chr19	38792214	38794105	GH19J038792	ENSG00000207296	RNU6-140P
chr19	42281205	42281661	18	chr19	42276358	42287467	GH19J042276	ENSG00000079432	CIC
chr19	42281205	42281661	18	chr19	42276358	42287467	GH19J042276	ENSG00000105429	MEGF8
chr19	42281205	42281661	18	chr19	42276358	42287467	GH19J042276	ENSG00000167625	ZNF526
chr19	42281205	42281661	18	chr19	42276358	42287467	GH19J042276	ENSG00000105732	ZNF574
chr19	43759087	43759888	18	chr19	43751434	43760318	GH19J043751	ENSG00000105771	SMG9
chr19	43759087	43759888	18	chr19	43751434	43760318	GH19J043751	ENSG00000131116	ZNF428
chr19	46784502	46785113	18	chr19	46782399	46789163	GH19J046782	ENSG00000105287	PRKD2
chr19	46784502	46785113	18	chr19	46782399	46789163	GH19J046782	ENSG00000105281	SLC1A5
chr19	47633485	47634166	18	chr19	47633113	47634483	GH19J047633	ENSG00000063169	BICRA
chr19	47718954	47719370	18	chr19	47716862	47721299	GH19J047716	ENSG00000268746	AC010519.1
chr19	47718954	47719370	18	chr19	47716862	47721299	GH19J047716	ENSG00000024422	EHD2
chr19	47718954	47719370	18	chr19	47716862	47721299	GH19J047716	ENSG00000178980	SELENOW
chr19	55643137	55643682	18	chr19	55639114	55645607	GH19J055639	ENSG00000171425	ZNF581
chr19	6092257	6092901	18	chr19	6090770	6094180	GH19J006090	ENSG00000087903	RFX2
chr19	8489481	8489884	18	chr19	8485787	8490491	GH19J008485	ENSG00000133246	PRAM1
chr2	101113238	101114075	18	chr2	101108727	101122115	GH02J101108	ENSG00000204634	TBC1D8
chr2	101113238	101114075	18	chr2	101108727	101122115	GH02J101108	ENSG00000272902	TBC1D8-AS1
chr2	101741981	101742498	18	chr2	101740400	101744199	GH02J101740	ENSG00000071054	MAP4K4
chr2	160220440	160221015	18	chr2	160219277	160230701	GH02J160219	ENSG00000241399	CD302
chr2	160220440	160221015	18	chr2	160219277	160230701	GH02J160219	ENSG00000115221	ITGB6
chr2	191171557	191172241	18	chr2	191165061	191174254	GH02J191165	ENSG00000227542	AC092614.1
chr2	191171557	191172241	18	chr2	191165061	191174254	GH02J191165	ENSG00000128641	MYO1B
chr2	196925518	196926244	18	chr2	196924553	196928399	GH02J196924	ENSG00000119041	GTF3C3
chr2	20179521	20180149	18	chr2	20177516	20181335	GH02J020177	ENSG00000115884	SDC1
chr2	216551717	216552058	18	chr2	216550837	216554463	GH02J216550	ENSG00000115457	IGFBP2
chr2	231701700	231702272	18	chr2	231701307	231702590	GH02J231701	ENSG00000237641	AC073476.1
chr2	234306409	234306819	18	chr2	234304505	234309862	GH02J234304	ENSG00000188042	ARL4C
chr2	240433698	240434402	18	chr2	240432941	240438533	GH02J240432	ENSG00000063660	GPC1
chr2	31390198	31390874	18	chr2	31388897	31391911	GH02J031388	ENSG00000158125	XDH
chr2	33014298	33014743	18	chr2	33013694	33016707	GH02J033013	ENSG00000049323	LTBP1
chr2	42795839	42796442	18	chr2	42791445	42796990	GH02J042791	ENSG00000143924	EML4
chr2	42795839	42796442	18	chr2	42791445	42796990	GH02J042791	ENSG00000226491	FTOP1
chr2	65068796	65069209	18	chr2	65068026	65071874	GH02J065068	ENSG00000011523	CEP68
chr2	68807826	68808427	18	chr2	68805641	68810625	GH02J068805	ENSG00000163219	ARHGAP25
chr2	68807826	68808427	18	chr2	68805641	68810625	GH02J068805	ENSG00000237576	LINC01888
chr2	70596314	70597586	18	chr2	70595865	70597992	GH02J070595	ENSG00000163235	TGFA
chr2	73939434	73939817	18	chr2	73937593	73940540	GH02J073937	ENSG00000114956	DGUOK
chr2	96927797	96928226	18	chr2	96927236	96928972	GH02J096927	ENSG00000168754	FAM178B
chr2	9801052	9802055	18	chr2	9797211	9803971	GH02J009797	ENSG00000172059	KLF11
chr20	1500054	1500867	18	chr20	1499081	1501641	GH20J001499	ENSG00000088833	NSFL1C
chr20	1500054	1500867	18	chr20	1499081	1501641	GH20J001499	ENSG00000125775	SDCBP2
chr20	1500054	1500867	18	chr20	1499081	1501641	GH20J001499	ENSG00000196209	SIRPB2
chr20	19913982	19914945	18	chr20	19913516	19921855	GH20J019913	ENSG00000233895	RP1-122P22.2
chr20	36861799	36862577	18	chr20	36853303	36864601	GH20J036854	ENSG00000149639	SOGA1
chr20	37295542	37296039	18	chr20	37293401	37298986	GH20J037293	ENSG00000101363	MANBAL
chr20	37331904	37332660	18	chr20	37331358	37333200	GH20J037331	ENSG00000101363	MANBAL
chr20	50496561	50497341	18	chr20	50496139	50499800	GH20J050496	ENSG00000232043	AL133230.2
chr20	50496561	50497341	18	chr20	50496139	50499800	GH20J050496	ENSG00000196396	PTPN1
chr20	50729167	50730211	18	chr20	50721282	50749087	GH20J050721	ENSG00000232043	AL133230.2
chr20	50729167	50730211	18	chr20	50721282	50749087	GH20J050721	ENSG00000124217	MOCS3
chr20	50729167	50730211	18	chr20	50721282	50749087	GH20J050721	ENSG00000124171	PARD6B
chr20	54105688	54106155	18	chr20	54105042	54108663	GH20J054105	ENSG00000019186	CYP24A1
chr20	62241367	62241884	18	chr20	62240845	62243425	GH20J062240	ENSG00000130703	OSBPL2
chr20	62378022	62378617	18	chr20	62374128	62379052	GH20J062374	ENSG00000130702	LAMA5
chr20	63255998	63256587	18	chr20	63252378	63256698	GH20J063252	ENSG00000101198	NKAIN4
chr21	33428605	33429311	18	chr21	33428260	33430223	GH21J033428	ENSG00000142188	TMEM50B
chr21	36434556	36435012	18	chr21	36434198	36435170	GH21J036434	ENSG00000230479	AP000695.1
chr21	41751532	41751955	18	chr21	41751056	41752947	GH21J041751	ENSG00000236384	LINC00479
chr21	42955408	42956076	18	chr21	42954672	42963720	GH21J042954	ENSG00000224100	AP001630.1
chr21	42955408	42956076	18	chr21	42954672	42963720	GH21J042954	ENSG00000160193	WDR4
chr22	17884088	17884497	18	chr22	17884436	17885931	GH22J017884	ENSG00000243156	MICAL3
chr22	17920001	17920659	18	chr22	17919243	17924399	GH22J017919	ENSG00000243156	MICAL3
chr22	29992794	29993324	18	chr22	29992378	29995810	GH22J029992	ENSG00000100330	MTMR3
chr22	30841248	30842076	18	chr22	30840204	30845284	GH22J030840	ENSG00000184792	OSBP2
chr22	31683113	31683773	18	chr22	31679561	31684273	GH22J031679	ENSG00000183530	PRR14L
chr22	39097051	39097666	18	chr22	39094133	39100780	GH22J039094	ENSG00000100298	APOBEC3H
chr22	44685496	44685990	18	chr22	44684300	44687671	GH22J044684	ENSG00000186654	PRR5
chr22	45537669	45538243	18	chr22	45536765	45539060	GH22J045536	ENSG00000077935	SMC1B
chr22	46147729	46148357	18	chr22	46147044	46152929	GH22J046147	ENSG00000186951	PPARA
chr3	100600274	100600878	18	chr3	100599714	100601560	GH03J100599	ENSG00000114354	TFG
chr3	10194423	10194865	18	chr3	10188773	10200915	GH03J010188	ENSG00000157017	GHRL
chr3	10194423	10194865	18	chr3	10188773	10200915	GH03J010188	ENSG00000134070	IRAK2
chr3	10194423	10194865	18	chr3	10188773	10200915	GH03J010188	ENSG00000231177	LINC00852
chr3	10194423	10194865	18	chr3	10188773	10200915	GH03J010188	ENSG00000157014	TATDN2
chr3	10194423	10194865	18	chr3	10188773	10200915	GH03J010188	ENSG00000134086	VHL
chr3	119638757	119639344	18	chr3	119635912	119640405	GH03J119635	ENSG00000138495	COX17
chr3	119638757	119639344	18	chr3	119635912	119640405	GH03J119635	ENSG00000242052	RPL10P7
chr3	123740363	123740921	18	chr3	123738698	123742325	GH03J123738	ENSG00000065534	MYLK
chr3	128095138	128095623	18	chr3	128094757	128096419	GH03J128094	ENSG00000175792	RUVBL1
chr3	146582061	146582522	18	chr3	146580522	146583113	GH03J146580	ENSG00000231213	PLSCR5
chr3	151318804	151319353	18	chr3	151317964	151320542	GH03J151317	ENSG00000138271	GPR87
chr3	153160454	153161130	18	chr3	153158939	153167942	GH03J153158	ENSG00000181467	RAP2B
chr3	153614433	153615122	18	chr3	153613771	153615472	GH03J153613	ENSG00000238755	LINC02006
chr3	159783847	159784652	18	chr3	159783151	159790612	GH03J159783	ENSG00000283154	IQCJ-SCHIP1
chr3	159783847	159784652	18	chr3	159783151	159790612	GH03J159783	ENSG00000252763	RNU2-31P
chr3	161420759	161421181	18	chr3	161418591	161421707	GH03J161418	ENSG00000240567	LINC02067
chr3	161420759	161421181	18	chr3	161418591	161421707	GH03J161418	ENSG00000196542	SPTSSB
chr3	170689225	170689860	18	chr3	170688675	170691100	GH03J170688	ENSG00000244738	AC026316.3
chr3	192850266	192851048	18	chr3	192846821	192853303	GH03J192846	ENSG00000180611	MB21D2
chr3	196135908	196136799	18	chr3	196135505	196146933	GH03J196135	ENSG00000224652	LINC00885
chr3	30346232	30346630	18	chr3	30341167	30350851	GH03J030341	ENSG00000281710	AC025614.2
chr4	127783204	127783795	18	chr4	127781089	127785346	GH04J127781	ENSG00000164070	HSPA4L
chr4	153748281	153748897	18	chr4	153747895	153749294	GH04J153747	ENSG00000145428	RNF175
chr4	158170927	158171621	18	chr4	158167999	158175200	GH04J158168	ENSG00000248429	FAM198B-AS1
chr4	158170927	158171621	18	chr4	158167999	158175200	GH04J158168	ENSG00000164125	GASK1B
chr4	184417833	184418206	18	chr4	184416176	184419357	GH04J184416	ENSG00000168310	IRF2
chr4	188107894	188108340	18	chr4	188106309	188112449	GH04J188106	ENSG00000179046	TRIML2
chr4	3385363	3386342	18	chr4	3384400	3390869	GH04J003384	ENSG00000159788	RGS12
chr4	52051588	52052304	18	chr4	52050999	52052895	GH04J052051	ENSG00000163069	SGCB
chr4	53917666	53918231	18	chr4	53913564	53918491	GH04J053913	ENSG00000249706	AC105384.1
chr4	8188757	8189250	18	chr4	8188122	8196347	GH04J008188	ENSG00000125089	SH3TC1
chr4	8205992	8206537	18	chr4	8205262	8207153	GH04J008205	ENSG00000125089	SH3TC1
chr5	150318677	150319156	18	chr5	150316147	150324144	GH05J150316	ENSG00000070808	CAMK2A
chr5	150318677	150319156	18	chr5	150316147	150324144	GH05J150316	ENSG00000113721	PDGFRB
chr5	160422934	160423515	18	chr5	160421209	160423791	GH05J160421	ENSG00000164611	PTTG1
chr5	160422934	160423515	18	chr5	160421209	160423791	GH05J160421	ENSG00000164609	SLU7
chr5	163509223	163509816	18	chr5	163502135	163510853	GH05J163502	ENSG00000038274	MAT2B
chr5	36442274	36442756	18	chr5	36441676	36445476	GH05J036441	ENSG00000079215	SLC1A3
chr5	36452103	36452798	18	chr5	36450128	36453658	GH05J036450	ENSG00000079215	SLC1A3
chr5	67020849	67021459	18	chr5	67019898	67022767	GH05J067020	ENSG00000069020	MAST4
chr5	73565090	73565792	18	chr5	73563986	73567159	GH05J073563	ENSG00000164331	ANKRA2
chr5	73565090	73565792	18	chr5	73563986	73567159	GH05J073563	ENSG00000164338	UTP15
chr6	13447991	13448371	18	chr6	13448001	13448799	GH06J013448	ENSG00000145990	GFOD1
chr6	150250735	150251199	18	chr6	150250412	150258403	GH06J150250	ENSG00000238594	AL355497.3
chr6	150250735	150251199	18	chr6	150250412	150258403	GH06J150250	ENSG00000198729	PPP1R14C
chr6	150255707	150256395	18	chr6	150250412	150258403	GH06J150250	ENSG00000238594	AL355497.3
chr6	150255707	150256395	18	chr6	150250412	150258403	GH06J150250	ENSG00000198729	PPP1R14C
chr6	30690961	30691347	18	chr6	30678583	30692067	GH06J030678	ENSG00000204574	ABCF1
chr6	30690961	30691347	18	chr6	30678583	30692067	GH06J030678	ENSG00000204536	CCHCR1
chr6	30690961	30691347	18	chr6	30678583	30692067	GH06J030678	ENSG00000204560	DHX16
chr6	30690961	30691347	18	chr6	30678583	30692067	GH06J030678	ENSG00000213780	GTF2H4
chr6	30690961	30691347	18	chr6	30678583	30692067	GH06J030678	ENSG00000230795	HLA-K
chr6	30690961	30691347	18	chr6	30678583	30692067	GH06J030678	ENSG00000137337	MDC1
chr6	30690961	30691347	18	chr6	30678583	30692067	GH06J030678	ENSG00000137404	NRM
chr6	30690961	30691347	18	chr6	30678583	30692067	GH06J030678	ENSG00000204569	PPP1R10
chr6	30690961	30691347	18	chr6	30678583	30692067	GH06J030678	ENSG00000146112	PPP1R18
chr6	30690961	30691347	18	chr6	30678583	30692067	GH06J030678	ENSG00000234127	TRIM26
chr6	30690961	30691347	18	chr6	30678583	30692067	GH06J030678	ENSG00000204599	TRIM39
chr6	30889866	30890718	18	chr6	30889338	30890893	GH06J030889	ENSG00000204580	DDR1
chr6	42890214	42891369	18	chr6	42889557	42891740	GH06J042889	ENSG00000221821	C6orf226
chr6	42890214	42891369	18	chr6	42889557	42891740	GH06J042889	ENSG00000146223	RPL7L1
chr6	47700034	47700611	18	chr6	47697463	47702360	GH06J047697	ENSG00000164393	ADGRF2
chr6	7479778	7480328	18	chr6	7479405	7480607	GH06J007479	ENSG00000096696	DSP
chr6	85406518	85407158	18	chr6	85401311	85407886	GH06J085401	ENSG00000135318	NT5E
chr7	101126205	101127202	18	chr7	101116193	101131292	GH07J101116	ENSG00000172354	GNB2
chr7	101126205	101127202	18	chr7	101116193	101131292	GH07J101116	ENSG00000106333	PCOLCE
chr7	101126205	101127202	18	chr7	101116193	101131292	GH07J101116	ENSG00000224729	PCOLCE-AS1
chr7	101126205	101127202	18	chr7	101116193	101131292	GH07J101116	ENSG00000106366	SERPINE1
chr7	101792281	101792696	18	chr7	101791523	101793194	GH07J101791	ENSG00000257923	CUX1
chr7	116500488	116501022	18	chr7	116498900	116503727	GH07J116498	ENSG00000237813	AC002066.1
chr7	116500488	116501022	18	chr7	116498900	116503727	GH07J116498	ENSG00000105971	CAV2
chr7	151116160	151116600	18	chr7	151112893	151117659	GH07J151112	ENSG00000133612	AGAP3
chr7	155951499	155952011	18	chr7	155949618	155954827	GH07J155949	ENSG00000204876	AC021218.1
chr7	158818472	158819176	18	chr7	158809466	158826045	GH07J158809	ENSG00000117868	ESYT2
chr7	45033580	45034299	18	chr7	45032967	45034397	GH07J045032	ENSG00000136280	CCM2
chr7	55774664	55775114	18	chr7	55774340	55775577	GH07J055774	ENSG00000226278	PSPHP1
chr7	56009613	56010119	18	chr7	56004329	56011082	GH07J056004	ENSG00000146729	NIPSNAP2
chr7	6403925	6404579	18	chr7	6403332	6404981	GH07J006403	ENSG00000164535	DAGLB
chr7	6403925	6404579	18	chr7	6403332	6404981	GH07J006403	ENSG00000136238	RAC1
chr7	80134389	80134781	18	chr7	80133126	80137261	GH07J080133	ENSG00000127955	GNAI1
chr8	103120224	103120742	18	chr8	103119472	103120942	GH08J103119	ENSG00000250929	LINC01181
chr8	106608419	106609112	18	chr8	106606472	106609727	GH08J106606	ENSG00000254615	AC027031.2
chr8	123708379	123708876	18	chr8	123707874	123709218	GH08J123707	ENSG00000104537	ANXA13
chr8	130904478	130904969	18	chr8	130902920	130906312	GH08J130902	ENSG00000253992	AC103726.2
chr8	22140609	22141332	18	chr8	22138505	22143093	GH08J022138	ENSG00000168495	POLR3D
chr8	22140609	22141332	18	chr8	22138505	22143093	GH08J022138	ENSG00000168476	REEP4
chr8	27361770	27362439	18	chr8	27359429	27372856	GH08J027359	ENSG00000120899	PTK2B
chr8	38936952	38937443	18	chr8	38934495	38940648	GH08J038934	ENSG00000169499	PLEKHA2
chr8	38936952	38937443	18	chr8	38934495	38940648	GH08J038934	ENSG00000147526	TACC1
chr8	47381432	47381967	18	chr8	47376883	47386159	GH08J047376	ENSG00000164808	SPIDR
chr8	48501216	48501877	18	chr8	48500791	48502724	GH08J048500	ENSG00000253608	AC022915.2
chr8	48522209	48523019	18	chr8	48521075	48524264	GH08J048521	ENSG00000253608	AC022915.2
chr8	48708914	48709518	18	chr8	48708397	48710486	GH08J048708	ENSG00000034239	EFCAB1
chr9	114278674	114279268	18	chr9	114276167	114279980	GH09J114276	ENSG00000207726	MIR455
chr9	115036250	115037154	18	chr9	115034375	115037518	GH09J115034	ENSG00000041982	TNC
chr9	132027920	132028401	18	chr9	132025476	132028842	GH09J132025	ENSG00000160563	MED27
chr9	133133298	133134217	18	chr9	133112070	133145873	GH09J133112	ENSG00000125485	DDX31
chr9	133133298	133134217	18	chr9	133112070	133145873	GH09J133112	ENSG00000125484	GTF3C4
chr9	133133298	133134217	18	chr9	133112070	133145873	GH09J133112	ENSG00000148308	GTF3C5
chr9	133133298	133134217	18	chr9	133112070	133145873	GH09J133112	ENSG00000160271	RALGDS
chr9	133133298	133134217	18	chr9	133112070	133145873	GH09J133112	ENSG00000148303	RPL7A
chr9	133133298	133134217	18	chr9	133112070	133145873	GH09J133112	ENSG00000165699	TSC1
chr9	133873951	133874676	18	chr9	133871811	133877587	GH09J133871	ENSG00000160293	VAV2
chr9	134323790	134324613	18	chr9	134323561	134331210	GH09J134323	ENSG00000186350	RXRA
chr9	134371550	134372289	18	chr9	134369342	134388125	GH09J134369	ENSG00000186350	RXRA
chr9	135951904	135952490	18	chr9	135947903	135953309	GH09J135947	ENSG00000130560	UBAC1
chr9	137273961	137274384	18	chr9	137273848	137275002	GH09J137273	ENSG00000188986	NELFB
chr9	470156	470554	18	chr9	468353	471443	GH09J000468	ENSG00000235330	RPL12P25
chr9	5629471	5629986	18	chr9	5623685	5631201	GH09J005623	ENSG00000107036	RIC1
chrX	130111112	130111717	18	chrX	130108258	130112536	GH0XJ130108	ENSG00000102034	ELF4
chrX	150694230	150694892	18	chrX	150691198	150698140	GH0XJ150691	ENSG00000063601	MTMR1
chr1	10063850	10064283	17	chr1	10063131	10067884	GH01J010063	ENSG00000054523	KIF1B
chr1	10063850	10064283	17	chr1	10063131	10067884	GH01J010063	ENSG00000162441	LZIC
chr1	10063850	10064283	17	chr1	10063131	10067884	GH01J010063	ENSG00000201746	RNU6-828P
chr1	10063850	10064283	17	chr1	10063131	10067884	GH01J010063	ENSG00000130939	UBE4B
chr1	10495958	10496375	17	chr1	10494613	10499279	GH01J010494	ENSG00000160049	DFFA
chr1	10495958	10496375	17	chr1	10494613	10499279	GH01J010494	ENSG00000142655	PEX14
chr1	111592874	111593444	17	chr1	111591663	111594860	GH01J111591	ENSG00000116473	RAP1A
chr1	111592874	111593444	17	chr1	111591663	111594860	GH01J111591	ENSG00000121933	TMIGD3
chr1	111592874	111593444	17	chr1	111591663	111594860	GH01J111591	ENSG00000284755
chr1	153567509	153568045	17	chr1	153561171	153569950	GH01J153561	ENSG00000189334	S100A14
chr1	153567509	153568045	17	chr1	153561171	153569950	GH01J153561	ENSG00000188643	S100A16
chr1	153567509	153568045	17	chr1	153561171	153569950	GH01J153561	ENSG00000196754	S100A2
chr1	153567509	153568045	17	chr1	153561171	153569950	GH01J153561	ENSG00000188015	S100A3
chr1	153567509	153568045	17	chr1	153561171	153569950	GH01J153561	ENSG00000196154	S100A4
chr1	153567509	153568045	17	chr1	153561171	153569950	GH01J153561	ENSG00000197956	S100A6
chr1	155125201	155125850	17	chr1	155123682	155132362	GH01J155123	ENSG00000169242	EFNA1
chr1	172476207	172476691	17	chr1	172475270	172480793	GH01J172475	ENSG00000135845	PIGC
chr1	172476207	172476691	17	chr1	172475270	172480793	GH01J172475	ENSG00000094975	SUCO
chr1	180953358	180953741	17	chr1	180952964	180955276	GH01J180952	ENSG00000243155	AL162431.1
chr1	180953358	180953741	17	chr1	180952964	180955276	GH01J180952	ENSG00000232586	KIAA1614-AS1
chr1	182101287	182101824	17	chr1	182100467	182102785	GH01J182100	ENSG00000225982	AL355482.2
chr1	184424199	184424822	17	chr1	184423927	184425004	GH01J184423	ENSG00000116667	C1orf21
chr1	200659238	200659760	17	chr1	200658002	200661065	GH01J200658	ENSG00000118197	DDX59
chr1	200659238	200659760	17	chr1	200658002	200661065	GH01J200658	ENSG00000260088	DDX59-AS1
chr1	200659238	200659760	17	chr1	200658002	200661065	GH01J200658	ENSG00000118193	KIF14
chr1	203650285	203650891	17	chr1	203647750	203658353	GH01J203647	ENSG00000058668	ATP2B4
chr1	208238776	208239204	17	chr1	208230883	208245985	GH01J208230	ENSG00000076356	PLXNA2
chr1	209430871	209431611	17	chr1	209427139	209435965	GH01J209427	ENSG00000230937	MIR205HG
chr1	212596224	212596914	17	chr1	212594813	212598098	GH01J212594	ENSG00000174606	ANGEL2
chr1	212596224	212596914	17	chr1	212594813	212598098	GH01J212594	ENSG00000162772	ATF3
chr1	225922141	225922922	17	chr1	225921795	225925481	GH01J225921	ENSG00000143811	PYCR2
chr1	226083818	226084328	17	chr1	226082738	226084232	GH01J226082	ENSG00000234478	ACBD3-AS1
chr1	226083818	226084328	17	chr1	226082738	226084232	GH01J226082	ENSG00000163041	H3-3A
chr1	226658149	226658497	17	chr1	226651712	226668199	GH01J226651	ENSG00000143772	ITPKB
chr1	234656975	234657753	17	chr1	234654618	234661971	GH01J234654	ENSG00000228044	AL160408.1
chr1	241688677	241689275	17	chr1	241688347	241690188	GH01J241688	ENSG00000162843	WDR64
chr1	25568215	25568726	17	chr1	25564789	25570544	GH01J025565	ENSG00000157978	LDLRAP1
chr1	26854960	26855324	17	chr1	26852194	26855861	GH01J026852	ENSG00000204160	ZDHHC18
chr1	28884647	28885254	17	chr1	28881865	28888618	GH01J028881	ENSG00000159023	EPB41
chr1	28884647	28885254	17	chr1	28881865	28888618	GH01J028881	ENSG00000162419	GMEB1
chr1	32179734	32180324	17	chr1	32178273	32182415	GH01J032178	ENSG00000224066	AL049795.1
chr1	32179734	32180324	17	chr1	32178273	32182415	GH01J032178	ENSG00000222046	DCDC2B
chr1	32179734	32180324	17	chr1	32178273	32182415	GH01J032178	ENSG00000160051	IQCC
chr1	32179734	32180324	17	chr1	32178273	32182415	GH01J032178	ENSG00000084652	TXLNA
chr1	32989118	32989573	17	chr1	32988001	32994555	GH01J032988	ENSG00000239670	AL355864.2
chr1	40315234	40315600	17	chr1	40311800	40317211	GH01J040311	ENSG00000049089	COL9A2
chr1	54323314	54323893	17	chr1	54322492	54329152	GH01J054322	ENSG00000225632	AL161644.1
chr1	54323314	54323893	17	chr1	54322492	54329152	GH01J054322	ENSG00000157216	SSBP3
chr1	61338179	61338869	17	chr1	61336691	61339744	GH01J061336	ENSG00000162599	NFIA
chr1	65177414	65177976	17	chr1	65174400	65178499	GH01J065174	ENSG00000162433	AK4
chr1	67575718	67576330	17	chr1	67574584	67577258	GH01J067574	ENSG00000116717	GADD45A
chr10	101830557	101831219	17	chr10	101828803	101833162	GH10J101828	ENSG00000166189	HPS6
chr10	101830557	101831219	17	chr10	101828803	101833162	GH10J101828	ENSG00000120049	KCNIP2
chr10	101830557	101831219	17	chr10	101828803	101833162	GH10J101828	ENSG00000226009	KCNIP2-AS1
chr10	102113057	102113539	17	chr10	102111943	102123523	GH10J102111	ENSG00000166189	HPS6
chr10	102113057	102113539	17	chr10	102111943	102123523	GH10J102111	ENSG00000198728	LDB1
chr10	102113057	102113539	17	chr10	102111943	102123523	GH10J102111	ENSG00000077150	NFKB2
chr10	102769702	102770408	17	chr10	102768835	102772103	GH10J102768	ENSG00000156398	SFXN2
chr10	103757648	103758376	17	chr10	103756117	103760513	GH10J103756	ENSG00000107957	SH3PXD2A
chr10	109894562	109894966	17	chr10	109891703	109896731	GH10J109891	ENSG00000272160	RNU4-5P
chr10	109894562	109894966	17	chr10	109891703	109896731	GH10J109891	ENSG00000108039	XPNPEP1
chr10	110862122	110862560	17	chr10	110857170	110875168	GH10J110857	ENSG00000214413	BBIP1
chr10	110862122	110862560	17	chr10	110857170	110875168	GH10J110857	ENSG00000150593	PDCD4
chr10	110862122	110862560	17	chr10	110857170	110875168	GH10J110857	ENSG00000108061	SHOC2
chr10	11884548	11885145	17	chr10	11879753	11885297	GH10J011879	ENSG00000148426	PROSER2
chr10	11884548	11885145	17	chr10	11879753	11885297	GH10J011879	ENSG00000225778	PROSER2-AS1
chr10	132424276	132424678	17	chr10	132392295	132424508	GH10J132392	ENSG00000180066	LINC02870
chr10	132424276	132424678	17	chr10	132392295	132424508	GH10J132392	ENSG00000171813	PWWP2B
chr10	13758330	13758703	17	chr10	13756601	13760122	GH10J013756	ENSG00000234091	AL157392.2
chr10	18627642	18628002	17	chr10	18626875	18628481	GH10J018626	ENSG00000240291	AL450384.2
chr10	18627642	18628002	17	chr10	18626875	18628481	GH10J018626	ENSG00000165997	ARL5B
chr10	18627642	18628002	17	chr10	18626875	18628481	GH10J018626	ENSG00000241058	NSUN6
chr10	52443412	52444085	17	chr10	52439624	52446895	GH10J052439	ENSG00000231131	LNCAROD
chr10	5538627	5539517	17	chr10	5536546	5541915	GH10J005536	ENSG00000205488	CALML3-AS1
chr10	61902642	61903487	17	chr10	61896541	61906705	GH10J061896	ENSG00000150347	ARID5B
chr10	62027928	62028568	17	chr10	62024639	62029314	GH10J062024	ENSG00000150347	ARID5B
chr10	69340689	69341111	17	chr10	69325401	69341401	GH10J069325	ENSG00000156515	HK1
chr10	71868138	71868548	17	chr10	71867680	71869030	GH10J071867	ENSG00000148719	DNAJB12
chr10	71868138	71868548	17	chr10	71867680	71869030	GH10J071867	ENSG00000197746	PSAP
chr10	71888856	71889521	17	chr10	71887738	71892741	GH10J071887	ENSG00000148719	DNAJB12
chr10	71888856	71889521	17	chr10	71887738	71892741	GH10J071887	ENSG00000197746	PSAP
chr10	71888856	71889521	17	chr10	71887738	71892741	GH10J071887	ENSG00000107738	VSIR
chr10	72298067	72298830	17	chr10	72294595	72299625	GH10J072294	ENSG00000148719	DNAJB12
chr10	73887644	73888233	17	chr10	73886001	73896016	GH10J073886	ENSG00000148660	CAMK2G
chr10	73887644	73888233	17	chr10	73886001	73896016	GH10J073886	ENSG00000166507	NDST2
chr10	75429995	75430413	17	chr10	75427639	75432433	GH10J075427	ENSG00000148655	LRMDA
chr10	79237605	79238175	17	chr10	79236559	79251703	GH10J079236	ENSG00000108179	PPIF
chr10	79237605	79238175	17	chr10	79236559	79251703	GH10J079236	ENSG00000108175	ZMIZ1
chr11	110296802	110297229	17	chr11	110292511	110300049	GH11J110292	ENSG00000137710	RDX
chr11	111378448	111378821	17	chr11	111375932	111381040	GH11J111375	ENSG00000196167	COLCA1
chr11	111378448	111378821	17	chr11	111375932	111381040	GH11J111375	ENSG00000214290	COLCA2
chr11	111378448	111378821	17	chr11	111375932	111381040	GH11J111375	ENSG00000110777	POU2AF1
chr11	11584316	11584705	17	chr11	11583875	11585608	GH11J011583	ENSG00000110328	GALNT18
chr11	118910312	118910637	17	chr11	118906479	118931105	GH11J118906	ENSG00000280502	AP003392.6
chr11	118910312	118910637	17	chr11	118906479	118931105	GH11J118906	ENSG00000245869	AP004609.3
chr11	118910312	118910637	17	chr11	118906479	118931105	GH11J118906	ENSG00000186174	BCL9L
chr11	118910312	118910637	17	chr11	118906479	118931105	GH11J118906	ENSG00000172375	C2CD2L
chr11	118910312	118910637	17	chr11	118906479	118931105	GH11J118906	ENSG00000160683	CXCR5
chr11	118910312	118910637	17	chr11	118906479	118931105	GH11J118906	ENSG00000172269	DPAGT1
chr11	118910312	118910637	17	chr11	118906479	118931105	GH11J118906	ENSG00000256269	HMBS
chr11	118910312	118910637	17	chr11	118906479	118931105	GH11J118906	ENSG00000118058	KMT2A
chr11	118910312	118910637	17	chr11	118906479	118931105	GH11J118906	ENSG00000173456	RNF26
chr11	118910312	118910637	17	chr11	118906479	118931105	GH11J118906	ENSG00000118181	RPS25
chr11	118910312	118910637	17	chr11	118906479	118931105	GH11J118906	ENSG00000110375	UPK2
chr11	118910312	118910637	17	chr11	118906479	118931105	GH11J118906	ENSG00000160695	VPS11
chr11	120055397	120056009	17	chr11	120054856	120059190	GH11J120054	ENSG00000255216	AP001360.1
chr11	58577704	58578292	17	chr11	58572721	58582249	GH11J058572	ENSG00000186660	ZFP91
chr11	62500236	62500731	17	chr11	62498958	62503693	GH11J062498	ENSG00000124942	AHNAK
chr11	62547928	62548308	17	chr11	62537956	62549868	GH11J062537	ENSG00000124942	AHNAK
chr11	62547928	62548308	17	chr11	62537956	62549868	GH11J062537	ENSG00000149499	EML3
chr11	62547928	62548308	17	chr11	62537956	62549868	GH11J062537	ENSG00000162231	NXF1
chr11	62547928	62548308	17	chr11	62537956	62549868	GH11J062537	ENSG00000162236	STX5
chr11	64324573	64325140	17	chr11	64320460	64325778	GH11J064320	ENSG00000149782	PLCB3
chr11	65182868	65183760	17	chr11	65180179	65185379	GH11J065180	ENSG00000254614	AP003068.2
chr11	65182868	65183760	17	chr11	65180179	65185379	GH11J065180	ENSG00000014216	CAPN1
chr11	65182868	65183760	17	chr11	65180179	65185379	GH11J065180	ENSG00000014138	POLA2
chr11	65899037	65899489	17	chr11	65886247	65904668	GH11J065886	ENSG00000255320	AP000759.1
chr11	65899037	65899489	17	chr11	65886247	65904668	GH11J065886	ENSG00000175334	BANF1
chr11	65899037	65899489	17	chr11	65886247	65904668	GH11J065886	ENSG00000175602	CCDC85B
chr11	65899037	65899489	17	chr11	65886247	65904668	GH11J065886	ENSG00000172757	CFL1
chr11	65899037	65899489	17	chr11	65886247	65904668	GH11J065886	ENSG00000175550	DRAP1
chr11	65899037	65899489	17	chr11	65886247	65904668	GH11J065886	ENSG00000175376	EIF1AD
chr11	65899037	65899489	17	chr11	65886247	65904668	GH11J065886	ENSG00000172500	FIBP
chr11	65899037	65899489	17	chr11	65886247	65904668	GH11J065886	ENSG00000175592	FOSL1
chr11	65899037	65899489	17	chr11	65886247	65904668	GH11J065886	ENSG00000172977	KAT5
chr11	65899037	65899489	17	chr11	65886247	65904668	GH11J065886	ENSG00000172732	MUS81
chr11	65899037	65899489	17	chr11	65886247	65904668	GH11J065886	ENSG00000245532	NEAT1
chr11	65899037	65899489	17	chr11	65886247	65904668	GH11J065886	ENSG00000174903	RAB1B
chr11	65899037	65899489	17	chr11	65886247	65904668	GH11J065886	ENSG00000173914	RBM4B
chr11	65899037	65899489	17	chr11	65886247	65904668	GH11J065886	ENSG00000173039	RELA
chr11	65899037	65899489	17	chr11	65886247	65904668	GH11J065886	ENSG00000175467	SART1
chr11	65899037	65899489	17	chr11	65886247	65904668	GH11J065886	ENSG00000142186	SCYL1
chr11	65899037	65899489	17	chr11	65886247	65904668	GH11J065886	ENSG00000087365	SF3B2
chr11	65899037	65899489	17	chr11	65886247	65904668	GH11J065886	ENSG00000173465	ZNRD2
chr11	66126678	66127540	17	chr11	66123536	66128765	GH11J066123	ENSG00000175115	PACS1
[truncated: 11,189 more rows]

## Sheet: p53peaks+REs
p53peak_Chromosome	p53peak_Start	p53peak_End	Number of supporting p53 ChIP-seq datasets	p53RE_Chromosome	p53RE_Start	p53RE_End	Strand	p53RE_class	HOMER_motif.score
[truncated: 7,705 more rows]
